# Supplementary material for: Proteome profiling of serum reveals PSMD6 as a biomarker in breast cancer metastasis
Source: Research Square preprint supplement (doi:10.21203/rs.3.rs-3634466/v1), 2023-12-11
Supplement: Supplementary file 1 [file 10346c504e347e51005209f9.xlsx]

## Sheet: Description
Table S2	Differentially expressed proteins between BC and Non-BC. Related to Figure 2
Sheet	Description
Table S2A	List of differentially proteins (Student's t-test, p-value <0.05, BC/Non-BC ratio >2 or <0.5) in BC and non-BC serum samples
Table S2B	List of significantly enriched terms in the functional enrichment analysis on DEPs
Table S2C	List of the upregulated protein (BC / Non-BC ratio >1.5 or <0.66) overlap among BC tumor tissue and BC serum
Table S2D	List of significantly enriched terms in the functional enrichment analysis on DEPs between tissue and serum samples
Table S2E	List of the serum protein panel (Student's t-test, p-value <0.05, BC/Non-BC ratio >2) associated with neutrophil degranulation

## Sheet: Table S2A
Table S2A : List of differentially proteins (Student's t-test, p-value <0.05, BC/non-BC ratio >2 or <0.5) in BC and non-BC serum samples
Upregulated in BC				Downregulated in BC
Stages	Fold change (BC/Non-BC)	p-value			Fold change (BC/Non-BC)	p-value
PA2G4	4.15442	1.29423e-26		AARSD1	0.366705	0.0396206
RAP1A	13.7819	8.0386e-22		ABCA6	0.167423	7.02213e-18
CCT8	2.37303	1.07577e-15		ABCF3	0.133598	5.75162e-07
AOC1	4.14409	1.88945e-12		ABHD10	0.384193	2.67521e-09
RHOA	3.58099	1.58956e-10		ACAD10	0.0132382	1.72749e-11
CD93	5.37542	8.05501e-10		ACAD8	0.134628	3.55479e-12
MGAM	17.7332	2.17807e-09		ACAN	0.177015	1.72453e-24
ITGAL	9.24262	4.92842e-09		ACOT1	0.0717891	0.000474086
PSMD6	3.7889	2.63889e-06		ACTR3C	0.480977	0.00796968
ALDH3B1	2.05919	0.000705794		ACTR3B	0.283243	4.30042e-07
ITGB2	2.22229	0.0186019		ACTR5	0.000332751	0.0266788
CYBA	11.5517	0.0286798		ADH1A	0.432324	0.013789
ARHGAP45	3.42809	0.0481391		ADH1C	0.460515	0.00219295
AATF	2.57202	0.0451067		ADPRH	0.339852	0.000157802
ABCB1	14.1941	0.000161964		AGK	0.350173	3.68458e-07
ABHD14B	2.09933	0.000309975		AGPS	0.0634658	3.52982e-18
ABLIM1	2.27972	0.0389579		AK1	0.186626	3.27995e-32
ACAA1	11.6957	1.35969e-33		AKAP12	0.226166	4.89214e-06
ACAD9	3.77597	0.000447643		AKR1C4	0.0484264	9.01908e-12
ACO1	2.10758	1.03431e-09		ALAD	0.284058	1.02958e-07
ACSF2	6.46271	0.0185539		ALDH1L1	0.312681	2.44231e-15
ACSL1	2.24955	4.27547e-07		ALPP	0.0627266	0.00594856
ACTN2	2.01868	5.85709e-05		ALPG	0.0622046	0.00556219
ACTN3	2.11813	1.36378e-05		ANGPTL3	0.349659	2.37796e-17
ADAMTSL4	258.33	1.35771e-15		ANK2	0.0565206	5.20488e-05
ADGRL2	2.01154	0.000106042		ANXA11	0.240873	0.00849012
AFAP1L2	16.0695	0.0354243		AOC2	0.173601	2.12349e-18
AFDN	2.37619	1.71039e-07		AP1B1	0.0821819	5.74095e-11
AGO3	2.66875	4.21671e-07		AP1M2	0.313382	0.044142
AGRN	3.55665	1.02475e-06		AP3B1	0.285635	2.93799e-06
AKR1B10	3.94591	1.57076e-50		AP4E1	0.282376	0.000551647
AKR1B15	3.52927	4.74746e-35		APOA5	0.297165	0.00276437
ALDH7A1	2.55743	0.0254126		ARHGAP25	0.0640328	1.83816e-54
ALG11	4.43903	1.03459e-15		ARHGEF10L	0.189428	7.04202e-10
ANK3	19.6463	0.000274009		ARHGEF12	0.395877	0.0386259
ANTXR2	5.86318	6.71565e-21		ARL15	0.479422	7.52175e-05
ANXA7	2.28368	0.0374816		ARMC5	0.245355	0.0144931
AP2S1	6.89567	0.000388002		ARSA	0.185082	8.1523e-12
APOBEC3G	13.0437	3.67688e-10		ASAP2	0.133467	1.78009e-30
APPL2	3.48285	0.0351477		ATAD1	0.267234	2.73252e-08
ARFGEF1	7.9799	1.63353e-17		ATL3	0.375163	7.22878e-20
ARFIP1	2.59208	0.000598157		ATP12A	0.0144147	3.87224e-10
ARL8A	2.09138	0.00175477		ATP1A4	0.456321	0.00553863
ARPC3	3.36294	0.000446601		ATP2A1	0.295509	4.15575e-17
ART4	3.45355	0.0398259		ATP5MG	0.465806	0.00399473
ARSH	6.52211	2.44859e-25		ATP6V1H	0.41565	6.78569e-07
ARSL	5.37016	5.50137e-23		ATPAF1	0.430628	0.00022468
ASCC1	3.65721	1.13656e-13		BAG6	0.313091	0.00174534
ASPSCR1	4.37995	6.7038e-05		BANF1	0.383549	0.027329
ATAD3C	8.65476	0.000736356		BCAM	0.290182	9.32281e-12
ATIC	2.06815	6.5812e-06		BCAN	0.102114	4.2039e-45
ATP1A2	3.31634	7.79174e-16		BCS1L	0.309899	0.0271962
ATP2A3	23.2809	1.93905e-15		BIRC6	0.418027	0.0388195
ATP2B4	19.3089	1.94871e-18		BLOC1S4	0.144962	3.98761e-50
ATP6AP1	2.44301	0.0025846		BRIX1	0.28383	3.15857e-09
ATP6V1E1	3.55175	0.000356999		C12orf10	0.30595	6.2119e-28
BABAM2	6.39596	0.0270771		BZW2	0.315862	2.69128e-11
BCAR1	14.8506	1.24225e-13		C1orf56	0.170172	1.47746e-17
BCL2L13	2.5525	0.0295432		CALD1	0.451495	1.48105e-07
BPHL	7.66885	0.0211666		CARD9	0.470823	2.40801e-13
BRAF	5.25232	3.86356e-14		CBWD1	0.000743354	0.0162444
BRAT1	2.12881	0.00525228		CBWD2	0.000777118	0.0162444
BTAF1	7.33581	1.94472e-10		CBWD3	0.000777118	0.0162444
BTK	6.9565	0.0437207		CBWD5	0.000777118	0.0162444
CAB39	2.62851	0.0150983		CBWD6	0.00118309	0.0459549
CAB39L	17.0541	0.0485418		CBX3	0.484695	0.0336035
CAD	2.03728	8.85027e-07		CC2D1A	0.105129	2.11818e-10
CAMK1D	2.1059	2.63836e-06		CCAR1	0.488931	5.35275e-08
CAMK2A	6.50385	0.00128729		CCAR2	0.31815	0.00159823
CAMK2B	223.448	0.000374196		CCNK	0.311339	2.86031e-09
CAMK2G	4.01863	0.00642223		CCT7	0.426606	2.2137e-08
CASP2	5.29352	3.19558e-10		CDC123	0.0777783	1.02745e-09
CCDC22	2.437	3.78083e-07		CDH6	0.0807069	3.92026e-11
CCDC90B	34.51	1.67142e-32		CEACAM6	0.18281	1.85757e-11
CDC42	2.87581	0.0011814		CELA3A	0.472987	0.00284517
CDC42BPB	20.7302	1.55784e-08		CES2	0.127353	1.1406e-09
CDK5	10.3474	6.27398e-05		CGREF1	0.45722	3.20046e-13
CDK5RAP3	3.03444	0.00836285		CHMP4A	0.358343	2.02382e-16
CELA2A	4.36918	2.01387e-08		CLEC12A	0.0596126	0.0405271
CETN2	3.32281	0.00278629		CLINT1	0.493236	1.21876e-06
CHD5	130.853	6.80256e-15		CLUH	0.471592	8.69785e-06
CHGA	2.30559	0.00829836		CLYBL	0.169177	0.00016135
CKM	4.40726	6.40748e-23		CMPK1	0.163571	5.29974e-07
CLIC1	4.50739	5.0204e-13		CNN3	0.385598	0.000210197
CLIC6	4.9123	2.03256e-05		CNOT1	0.0262728	6.9115e-20
CNOT9	12.9996	0.00016379		COG4	0.144993	0.000725095
CNTFR	3.49871	0.0139255		COL18A1	0.412632	1.14925e-05
COL6A5	2.71411	0.0494652		COMMD2	0.472867	1.9857e-08
COL8A1	4.71204	4.79589e-05		COPS4	0.404618	4.38188e-08
COX5A	2.71085	0.00171546		COQ6	0.427534	0.000396758
CPNE1	2.91746	0.00278531		CORO2A	0.458638	3.34475e-09
CPNE2	2.47915	1.19041e-08		CRISP3	0.26422	5.05111e-09
CPNE5	5.61452	3.76165e-20		CROCC	0.161159	6.15991e-25
CPOX	6.66859	2.13018e-06		CRYZL1	0.000240181	0.0385413
CPSF6	2.11993	0.000403445		CSE1L	0.375668	5.12537e-15
CPT1A	13.9501	1.5584e-29		CSTF1	0.386444	0.00673445
CRIPT	6.07339	0.0407089		CTNNA2	0.373516	0.0017491
CSDE1	52.5786	9.96789e-30		CUL3	0.121274	1.14936e-09
CST6	2.57008	1.55193e-18		CZIB	0.0638701	2.05919e-12
CTPS2	2.33732	0.000153623		DCTN4	0.106979	1.85117e-05
CTR9	12.7855	7.99075e-32		DDX58	0.390447	2.20965e-07
CUBN	6.04283	0.00070002		DERPC	0.374783	1.24644e-08
CWF19L1	2.54067	0.0148214		DENND4C	0.0336259	5.0429e-33
CYB5R1	5.98493	2.23609e-20		DHX9	0.491849	1.21318e-05
CYC1	2.66899	0.0286777		DLAT	0.0734435	1.33522e-11
CYP4B1	4.94647	0.0456077		DMPK	0.226311	1.95259e-11
CYRIA	3.3389	0.0035455		DNAJC13	0.209266	1.85181e-24
DAB2IP	560.835	0.0409588		DNAJC6	0.209292	0.0231249
DBN1	9.57857	2.29974e-13		DNMT3A	0.0487365	0.0320128
DCXR	4.20114	9.73505e-09		DOCK10	0.468984	0.000347986
DDI2	7.66988	9.68664e-11		DPEP1	0.211089	0.016336
DDX27	7.43578	0.0448821		DPEP2	0.492611	1.05211e-05
DDX6	2.34651	0.0249894		DPH2	0.0379773	0.00898914
DFFA	2.91046	0.000216092		DPP7	0.25782	2.71336e-05
DHRS7	2.05396	0.0475441		DSTN	0.216965	1.04897e-08
DNAJA3	2.75639	0.00778102		EARS2	0.40085	0.0221615
DNAJB4	3.28272	0.00165133		EFNB1	0.289093	0.000417563
DNM1	13.3512	2.54367e-09		EIF3F	0.364184	0.035494
DNM1L	2.37797	1.28829e-21		EIF4E2	0.126688	0.0279527
DNM3	10.4445	5.18948e-08		ELAC2	0.0378396	2.30362e-15
DPYD	4.06932	0.000647325		ELMOD2	0.258232	0.0211637
DPYSL3	3.21164	7.6904e-18		EML4	0.389098	0.000293604
DSG2	2.49279	6.48078e-08		EPB41	0.322528	4.13347e-15
DTNB	2.038	0.000749546		EPB41L3	0.26611	0.00276853
DUOX1	3.77182	2.23477e-08		EPHB1	0.482848	8.1854e-06
DUOX2	13.0729	2.48442e-14		EPN1	0.413519	0.039646
DYNLRB1	2.60529	1.91341e-07		EPS15L1	0.0347739	5.97503e-25
ECE1	7.49388	0.000806724		ERO1A	0.296096	0.0121186
EEF1AKMT4	3.04994	0.0366501		ERP44	0.360036	3.54641e-10
EEF1AKMT4-ECE2	2.96015	0.038254		ETFB	0.360408	0.0415174
EIF2S1	5.78131	5.4004e-08		ETFDH	0.15156	0.0372423
EIF2S2	3.48394	0.00118301		EXOC1	0.459614	0.000160953
EIF3H	6.12126	2.29645e-08		EXOC5	0.196379	0.0051905
EIF4A3	2.59615	1.73163e-11		F11R	0.174846	9.24037e-15
EIF4B	23.1984	6.76953e-39		FAF2	0.341941	0.000886236
EIF4G3	13.1921	2.44453e-30		FAM135A	0.250143	1.58024e-14
EIF4H	3.09093	0.000838974		FAM169A	0.000734577	0.00774034
ELN	2.55812	1.21223e-20		FAM83H	0.35764	3.09604e-05
EMC7	8.1498	0.0330817		FAM91A1	0.291869	0.00183002
ENPP6	13.5194	2.12663e-06		FCGR2B	0.0871028	0.026007
EOGT	4.48965	4.81839e-16		FCHSD1	0.0139698	2.04428e-11
EPB41L1	2.93927	0.000371722		FDPS	0.122645	0.000894117
EPN2	3.0688	0.00106026		FDXR	0.290477	6.81357e-12
ERAL1	6.3962	0.0445354		FGB	0.365032	0.0346461
ERLIN2	2.48991	0.00229518		FGG	0.402158	0.0489153
ESF1	2.51327	0.0404459		FHOD1	0.203597	8.4781e-12
EXOC6B	2.77495	0.00149622		FLG2	0.169831	2.99039e-09
EXOC8	4.95837	1.48029e-22		FNDC3A	0.49578	7.86947e-18
FBXO3	9.70556	1.74334e-08		FTMT	0.289727	0.0479658
FBXO38	7.06005	0.0270721		FXR2	0.00590054	0.044458
FHL2	16.743	0.0226404		G3BP1	0.466037	0.0139549
FKBP10	3.56303	0.00408671		GAPVD1	0.154516	0.000398031
FKBP15	4.69097	4.15601e-31		GARS1	0.0490176	1.31696e-35
FKBP4	2.23604	1.80295e-08		GBF1	0.389788	7.88685e-07
FLG	14.3057	2.33775e-09		GBP2	0.28682	0.0260142
FNTB	3.58912	0.0365255		GCC2	0.205999	0.0468191
FSTL1	8.25116	0.042786		GCSH	0.201212	7.77005e-07
FUCA2	8.10034	1.0456e-05		GDPD1	0.0408345	7.82831e-12
FYN	4.91854	0.000448516		GID8	0.25436	2.877e-09
GABPA	2418.24	0.00641019		GIPC3	0.47758	3.26279e-13
GALM	4.99446	9.57695e-34		GIT1	0.446033	3.76429e-19
GINS1	4.86666	0.000103777		GLA	0.29886	2.06466e-09
GIT2	18.1006	6.83566e-23		GMFB	0.090654	0.000960926
GMDS	13.6773	0.036882		GNAT1	0.277848	1.88728e-06
GMIP	4.78169	0.000622431		GNAL	0.27499	2.00309e-06
GMPPA	5.53107	0.0238328		GNAT2	0.272994	1.85641e-06
GMPR2	3.38027	6.72028e-10		GNAT3	0.271731	1.96448e-06
GNG10	7.92927	0.0458382		GNPAT	0.0500577	1.23318e-10
GOLGA2	8.91366	4.12149e-05		GOLGB1	0.13502	4.20529e-26
GPN3	2.17512	0.0263882		GON7	0.423504	0.00743491
GSDMA	2.96955	1.04424e-06		GP6	0.050787	2.03764e-11
GSTA5	2.67737	0.011957		GPRC5C	0.103775	3.21376e-43
GSTA3	2.31496	4.90845e-17		GRK2	0.257041	1.01774e-15
GSTM3	2.00438	0.0271074		GUCY1B1	0.122741	0.000274081
GTF3C4	2.27871	0.00136577		HADHB	0.484737	5.65336e-09
GUCY1A2	4.98156	0.0348745		HDAC8	0.0112249	0.0431232
H1-2	3.74278	1.46936e-30		HCK	0.325709	1.57672e-07
H1-3	3.62022	4.29005e-31		HDAC2	0.321322	4.38871e-19
HAAO	2.81425	9.95329e-09		HDGFL2	0.287768	1.36023e-09
HAPLN4	2.81084	0.00345304		HLA-H	0.434306	2.72771e-10
HEATR1	13.2769	2.54104e-08		HMGB3	0.467015	5.75662e-08
HGD	4.32541	2.054e-09		HNRNPA1L2	0.137681	1.42283e-10
HIP1R	4.37481	5.21263e-06		HNRNPD	0.291013	1.06907e-05
HKDC1	11.4661	2.0845e-15		HPCAL4	0.303506	0.0293289
HMGB2	5.05376	0.0108705		HPN	0.0390759	0.0443168
HSP90AA4P	6.3698	2.18367e-06		HSD17B10	0.453515	0.0001066
HSPA12A	8.5232	1.60144e-08		HSP90AA2P	0.154023	7.63894e-13
HSPA4	2.13973	3.37795e-08		HSP90AB2P	0.16532	0.0494541
HTT	10.5227	5.08894e-09		HSPB6	0.233624	0.0104821
IBA57	2.65493	0.000258502		IAH1	0.291211	0.000158994
ICAM3	4.99983	0.00489674		IFI16	0.0996644	6.68351e-11
IDH2	35.3783	0.0131886		IGF2BP2	0.471809	0.0369005
IDH3B	3.35268	0.00162129		IGLV5-45	0.383654	1.91372e-05
IDO1	3.50395	0.00160643		IKBIP	0.408446	0.0113109
IGFBP5	2.66146	0.0102499		INF2	0.483729	4.79454e-10
IGSF8	10.5853	5.66932e-10		INTS3	0.408579	1.40761e-05
ILVBL	2.45822	5.59583e-07		ISG15	0.259636	0.0123976
INTS13	923.687	0.0339392		ITGA1	0.167002	6.96427e-09
ITGA2B	2.87602	0.00798396		ITGAM	0.370618	2.0546e-07
ITGA5	4.86668	1.3715e-05		ITPKC	0.260161	0.00216039
JAGN1	2.68206	0.0321263		ITPR1	0.12831	3.73751e-32
KAT8	15.5533	0.0203949		KEAP1	0.216676	2.01825e-07
KHDRBS2	17.5472	0.0407191		KLK10	0.244145	5.20969e-09
KIF13B	21.6095	4.85427e-16		KPNA5	0.445987	0.000228462
KIF1A	2.09266	0.025238		KRAS	0.284365	4.57282e-07
KIF5C	2.13878	3.54901e-11		KRT12	0.17646	0.000533609
KRT222	2.19416	0.00321015		LAMP1	0.418871	0.00267714
LAMTOR4	2.71887	0.0417589		LAMTOR2	0.323293	3.59846e-08
LARP7	10.3225	8.97636e-39		LBR	0.30297	0.0117825
LDLRAP1	3.33612	0.000118553		LRRC32	0.0899847	0.0487108
LEPR	3.16818	5.91719e-08		LTBP4	0.176037	2.98528e-27
LGALS2	2.46347	0.0475609		LYN	0.208449	6.12921e-15
LIG1	3.37308	0.00836305		MAGI2	0.00100839	0.0292193
LMAN2L	3.22247	1.36813e-06		MAP1S	0.196546	1.91646e-06
LNPEP	11.0345	8.28675e-34		MAP2K2	0.221652	6.48165e-05
LPP	11.6295	1.9929e-17		MAP4K4	0.0906455	2.14099e-19
LRCH1	2.89709	0.0119064		MCM6	0.497066	2.57281e-09
LRCH2	2.89809	0.0119041		METTL14	0.117913	0.0382214
LRP2	4.31544	2.89267e-08		MICALL2	0.328263	6.54983e-12
LRP6	8.5319	0.000632132		MISP	0.355211	3.46235e-06
LRRFIP1	4.46504	2.72708e-20		MLYCD	0.167683	0.0123134
LSM1	3.93894	3.12215e-25		MMP10	0.123645	2.2507e-49
LSM3	2.04235	0.001134		MOGS	0.443196	9.41457e-15
LSM4	2.83851	0.00142412		MOV10	0.325008	0.00392772
LSR	12.4932	0.000134359		MPV17	0.420073	0.0333123
MADCAM1	16.8153	2.73722e-09		MRPL40	0.0125954	0.0415739
MADD	28.6166	0.000475984		MSH6	0.189511	1.17631e-28
MAG	2.39822	8.37573e-05		MYO1D	0.479641	0.0170184
MAN2B2	3.33746	0.031061		NAP1L4	0.135222	0.000919879
MAP4	2.12863	6.13797e-10		NCAN	0.218968	2.15714e-09
MB21D2	6.00176	0.000148991		NCF1C	0.227425	9.36905e-11
MBD2	8.96208	0.000163822		NCF1	0.226979	7.77376e-11
MDN1	5.24599	1.35792e-21		NCF1B	0.223807	6.1851e-11
MERTK	3.65501	1.63917e-25		NCOR1	0.0951149	0.000711163
MFGE8	2.39994	7.8243e-22		NDUFS1	0.43278	3.9839e-09
MGAT5	3.72948	0.0370349		NDUFS3	0.10072	6.24656e-22
MMRN2	7.27383	6.99613e-17		NF2	0.0015077	0.0314338
MMS19	2.16459	5.65231e-15		NGLY1	0.363309	0.00402598
MRE11	3.5661	0.048266		NTM	0.341503	0.0449242
MS4A1	11.9835	0.0462468		NUDT16	0.107684	0.00759431
MTFR1L	9.44961	1.30879e-05		NUFIP2	0.0785253	1.00779e-14
MTM1	2.25664	0.00530991		OAS2	0.426928	0.00236736
MUC5AC	3.27534	1.28189e-07		OAS3	0.0719745	8.88145e-10
MXRA8	3.28914	0.000770609		OIT3	0.251156	0.0429126
MYBBP1A	10.6878	1.79592e-12		OLFM4	0.417388	1.61678e-06
MYD88	2.69569	0.0468207		ORC3	0.294967	0.0256925
MYO1G	5.391	1.09835e-20		OSBP	0.219106	2.1064e-15
MYO7B	4.49138	0.000795257		OVCA2	0.120221	0.0158127
NACA	4.18501	0.0337905		PACSIN2	0.154515	9.66603e-20
NADSYN1	3.05731	0.0269424		PAFAH1B1	0.469434	0.0253042
NANS	3.90447	8.74384e-05		PARS2	0.143334	3.27411e-27
NAPRT	7.90788	8.30629e-15		PBLD	0.35474	0.00892431
NARS2	5.71	1.33131e-25		PCBP3	0.102384	0.000269006
NBEAL2	21.7682	0.045919		PCDH1	0.277729	1.50553e-13
NCK1	2.0313	0.0248468		PDK1	0.191727	4.82158e-05
NDE1	9.08383	0.0237428		PDK2	0.1969	9.60873e-05
NDRG1	2.02301	3.59297e-06		PDK4	0.196055	0.000112895
NDUFA9	2.24041	0.000154012		PEX1	0.134608	1.69607e-09
NDUFAF7	7.47717	0.000105753		PHB2	0.38067	1.34931e-27
NDUFB4	2.26264	1.83859e-08		PI16	0.341285	0.0408046
NDUFS8	7.03985	0.0457353		PIEZO1	0.0574782	0.000306534
NELFB	2.53449	0.000885052		PIGS	0.27274	8.45939e-09
NGRN	14.7035	0.031806		PIP	0.343111	3.55812e-13
NIBAN2	2.71894	9.75405e-09		PIP4P1	0.181338	0.0450183
NIPSNAP1	3.0867	0.00474625		PLCD3	0.208782	3.88277e-06
NIPSNAP2	2.19196	0.0315099		PLXDC1	0.370128	1.47443e-05
NIT2	7.37436	8.39749e-15		PNLIPRP1	0.160576	4.33362e-09
NLRX1	5.5167	0.000371411		POLG2	0.0205784	1.19304e-11
NOL3	3.67832	3.03944e-14		POLR2C	0.0969596	0.00991509
NOMO2	8.57043	0.00171857		PPIC	0.368253	0.0156564
NOMO3	8.35273	0.00176179		PPIG	0.091821	3.97565e-11
NOP14	25.7871	7.84457e-17		PPP1CA	0.494575	4.50547e-06
NPM3	2.4458	0.0438932		PPP1CB	0.288023	9.15565e-27
NUP107	8.12858	4.52811e-25		PPP2R2A	0.310132	1.7626e-13
NUP210	5.02315	4.03645e-06		PRF1	0.136125	0.0375313
NUP93	2.28953	7.26633e-15		PRG2	0.470365	0.0479705
OCLN	8.78064	0.000310793		PRKAG1	0.475608	0.0259264
OGDHL	4.72568	0.033352		PRKCSH	0.465165	0.0102961
OGT	3.01088	0.00708091		PRKRA	0.392592	2.01932e-17
OLFML2B	12.3152	0.014		PRORP	0.110725	0.0148613
OMD	2.76808	2.21789e-06		PRSS29P	0.102285	0.0110836
OPHN1	3290.06	0.0129241		PSIP1	0.328502	2.26439e-08
OPLAH	13.2496	3.53283e-05		PSMA4	0.265429	2.35575e-14
OSBPL3	9.28723	8.60508e-05		PSMB7	0.402362	0.000353969
OXSR1	8.40016	8.35803e-28		PSMB9	0.395087	1.11984e-05
P4HA1	6.4043	1.18944e-05		PTGES3	0.125676	0.0337437
PARG	42.6683	7.57014e-34		PTPRZ1	0.128465	3.48242e-08
PARP4	7.39308	0.00101161		PVR	0.0766614	1.70383e-10
PARVG	1675.66	0.00862776		PXDN	0.255834	0.0142462
PCBD1	7.36591	0.0293933		PYCARD	0.359492	2.0579e-09
PDIA6	2.22034	6.27896e-14		RAB12	0.000465227	0.0353128
PDXDC1	5.02797	5.57246e-05		RAB1A	0.450585	4.33212e-14
PFDN4	5.33032	0.000365427		RAB2A	0.353046	2.2389e-13
PIGG	2.65997	0.0127536		RAB3GAP2	0.295357	0.00414159
PIK3CB	6.09975	0.00099813		RAB5B	0.32352	2.28856e-05
PIKFYVE	12.0665	5.27556e-06		RANGAP1	0.121019	3.51787e-11
PIP4K2A	16.5079	3.74515e-27		RAVER1	0.136642	2.62355e-24
PIP4K2B	2.24623	0.0431586		RBBP4	0.118877	1.0553e-05
PITPNB	3.77436	0.0120956		RBBP7	0.120184	8.732e-06
PITPNM2	1671.64	0.0239221		RBMXL1	0.336409	3.48036e-06
PKP1	4.09372	0.000435003		RCL1	0.340309	8.18075e-11
PKP3	10.5872	7.40725e-19		RECK	0.376956	1.09748e-07
PLBD1	2.27272	0.0461774		RETREG2	0.251727	8.32647e-11
PLBD2	2.49074	7.81985e-11		RFC1	0.337312	8.38294e-05
PLCB4	3.08453	2.88257e-18		RHOC	0.207503	0.000451708
PLEK2	5.47058	0.0494377		RIC8A	0.0706511	0.000158312
PLXNB1	5.97788	2.5359e-18		RMDN3	0.288939	2.54057e-14
POLR2A	3.04097	3.90302e-22		RNASET2	0.321842	0.0029801
PPP1R13L	7.04737	8.82757e-19		RNF20	0.0455751	0.00035119
PPP6R2	3.42209	0.0402021		RPL12	0.319911	0.0475579
PREB	5.30455	4.08514e-25		RPL17	0.232853	2.3611e-21
PRKACB	2.36114	2.43154e-13		RPL8	0.211211	1.37567e-08
PRNP	2.19104	2.34025e-09		RPS10	0.127907	5.91002e-29
PROCR	10.9553	1.07477e-26		RPS6	0.112559	9.59868e-11
PRPH	5.69796	1.38133e-15		RTN3	0.385408	2.24371e-10
PRPSAP2	3.11224	3.10419e-23		SACM1L	0.395567	3.84466e-15
PSMA1	2.03122	0.00298772		SARDH	0.279144	0.0188494
PSMB3	2.09398	1.64973e-08		SARM1	0.35769	5.54688e-23
PSMB5	20.261	5.95887e-35		SEPTIN10	0.267679	9.51573e-10
PSMD10	2.65781	0.0126677		SF1	0.331424	0.014194
PTBP2	2.26906	0.000814518		SHTN1	0.325381	0.0122431
PTGFRN	2.30299	4.80211e-06		SLC25A42	0.0222711	1.14995e-12
PTK2B	2.74748	0.0374681		SLC44A2	0.0958902	2.00966e-11
PTP4A1	2.89879	0.00117762		SLC9A3R1	0.243856	3.27736e-07
PTPA	4.17668	3.84978e-05		SLK	0.0474013	2.40469e-15
PTPN11	2.53421	5.73286e-20		SMC4	0.287519	0.0023234
PTPN13	2.25159	5.16904e-08		SMOC1	0.000243594	0.0402188
PTPRM	10.3406	0.000892672		SMPD4	0.273619	5.92516e-09
PYCR1	2.29071	0.0446495		SMPDL3B	0.000435879	0.00509932
RAB18	3.52732	0.00371111		SNX4	0.185602	2.73485e-08
RAB21	2.44848	0.015158		SORD	0.465988	7.80383e-10
RAB32	7.25498	2.67996e-35		SORL1	0.353495	0.0379711
RARS2	8.61187	3.57395e-13		SP140L	0.143664	2.20287e-11
RBMXL3	3.78915	0.00230114		SPP2	0.204797	7.22751e-05
RCN3	12.0861	4.29151e-41		ST6GAL1	0.122734	0.00898941
RENBP	13.749	0.0120299		STAU1	0.490301	1.62252e-11
RHCE	2.38434	0.0221837		STK10	0.0395795	0.0390567
RHD	2.38452	0.0221835		STK39	0.418702	5.42464e-08
RMDN1	2.74715	6.30725e-06		STK4	0.223629	1.77053e-11
RNF2	2.11952	0.012487		STT3B	0.495653	6.87682e-06
RNH1	3.77978	1.56831e-12		SUB1	0.288062	1.42525e-05
RPL21	2.03265	0.0322086		SULT1A3	0.273539	1.3165e-09
RPL22	2.61003	1.509e-05		SULT1A4	0.273539	1.3165e-09
RPRD1A	3.10914	0.00159034		SYTL4	0.282558	0.0470779
RPS18	2.62383	0.0351014		TACO1	0.122627	1.15561e-11
RPS6KA1	6.68463	0.000120683		TARS3	0.0998329	0.000932043
RPS6KA2	7.71039	0.000123681		TBC1D13	0.186748	0.0104105
RPS6KA3	7.18143	0.000334407		TBCA	0.488304	0.00039808
RPTOR	12.0433	1.64663e-09		TCOF1	0.259018	0.0411782
RRAGA	3.66021	0.0487813		TGFB1	0.0758852	4.93143e-08
RRAGB	3.44956	0.0403552		TGM3	0.442851	0.049262
RRP8	4.00946	0.000676468		TLE3	0.487084	7.14519e-05
SAMM50	12.6942	6.70637e-32		TMED10	0.401559	4.49098e-08
SARS1	2.99316	6.75916e-20		TMED9	0.146139	3.6543e-09
SBF2	2.015	0.0449952		TMEM33	0.181758	3.95854e-10
SCARB1	6.975	0.000766812		TMPO	0.146013	6.7652e-05
SEC24A	4.26386	0.00243437		TNPO3	0.398166	0.0487726
SEC24B	7.99817	1.67591e-11		TRAPPC8	0.00475495	0.0378633
SEC31A	2.27181	6.73188e-06		TRIM22	0.134216	0.0243149
SEC61A1	6.12713	2.38738e-05		TRIP6	0.0813825	0.0389796
SEC61A2	13.5882	2.48313e-06		TRMT10C	0.344108	0.0325713
SEMA3G	2.47929	0.0291602		TSG101	0.237177	0.000454864
SEMA7A	4.21034	0.00450474		TSPYL1	0.0655769	0.00980006
SEPTIN6	5.15562	0.000912557		TWF1	0.267967	4.33261e-08
SEPTIN9	15.2969	4.09883e-20		TXNIP	0.0946291	2.98592e-13
SERPINB2	4.12261	7.05725e-06		UBA3	0.106421	6.16388e-06
SF3A1	2.67959	0.00894759		UBE2J1	0.180227	0.00333445
SFPQ	8.494	0.0371391		UBE4A	0.293832	1.59392e-09
SFXN3	2.711	0.00703851		UBFD1	0.481542	4.06622e-08
SGCB	2.46156	0.00481937		UBR4	0.330184	4.51773e-11
SH3GL1	2.40884	1.4893e-06		UMOD	0.305536	1.48814e-17
SIN3A	2.41251	2.8335e-12		UNG	0.30891	0.0323634
SLC2A11	2400.24	0.0337408		UPF1	0.45864	9.46638e-08
SMARCC1	26.6502	4.98613e-21		USP11	0.178146	2.72062e-11
SMARCC2	2.49951	6.35601e-11		USP30	0.254257	0.0293085
SMC2	14.9044	2.08522e-41		USP9X	0.0946355	0.000162596
SMG1	3.61744	0.0303055		VAMP7	0.175286	7.27041e-07
SMPDL3A	3.26836	0.00514462		VDAC2	0.408379	0.00254631
SNAPIN	9.51153	0.0203892		VPS16	0.128834	0.0423496
SNIP1	2.67797	0.00119807		VPS18	0.100898	1.93923e-08
SNX1	2.42044	0.0377171		VPS26A	0.241839	2.09745e-29
SNX2	2.36841	5.93841e-08		VPS26B	0.28249	1.92031e-23
SPINK1	101156	0.0179334		VPS35	0.164154	4.72628e-09
SRRT	4.83122	3.12257e-05		VWA1	0.174901	3.5991e-08
SRSF12	9.09657	0.00429081		WASF3	0.202851	0.000338485
ST6GALNAC4	4.44207	0.0433606		WASHC5	0.057651	5.77596e-10
STAG3	9.92385	0.011649		WDFY1	0.308836	2.73241e-38
STAM2	5.16925	0.0013051		WDR3	0.090299	0.00030487
STAT5B	5.22423	1.11645e-14		WDR36	0.0536703	5.26176e-11
STRN3	6.60524	0.0317757		WDR75	0.284169	0.00197107
STRN4	2.27133	0.0275873		ZCRB1	0.470769	0.000259645
STXBP2	3.91101	1.76249e-06
SUGT1	4.31186	0.000438682
SUN1	5.12389	3.71437e-38
SUSD2	5.38015	3.93453e-07
SUSD5	3.71103	0.0409287
SVIL	3.35397	0.0254066
SWAP70	5.88577	6.65462e-39
SYK	4.65964	2.59287e-28
SYNCRIP	3.40783	5.05209e-23
TANGO2	3.32722	6.60879e-05
TAP2	3.63246	0.0246063
TBC1D15	11.1316	1.32753e-14
TBC1D5	47.8858	2.15975e-30
TBCB	3.32128	7.68888e-07
TCAF1	298.752	0.0395597
TCAF2	403.286	0.0494679
TCIRG1	8.16394	0.000110009
THNSL1	3.76292	0.00523146
THYN1	5.88714	0.0103855
TKFC	44.0454	2.19922e-22
TM9SF3	2.41914	5.8273e-06
TMEM126A	4.13409	2.53693e-05
TMEM192	4.08872	0.00958279
TMEM205	2.38476	0.0147428
TMEM245	1361.13	0.0415722
TMEM62	4.30442	0.00274067
TMEM68	2.46326	3.30501e-16
TNFAIP8	4.31958	0.0415315
TOM1L2	2.64664	0.0335547
TOX2	3.82201	0.0325001
TOX3	3.82123	0.0325002
TOX4	3.82098	0.0325002
TP53BP1	4.01403	1.26561e-07
TRIM3	18.7145	0.000243888
TRIM46	2.98851	0.0486052
TRNT1	6.88175	1.41769e-17
TXNRD1	2.34331	4.95053e-07
UBA7	2.1484	6.23962e-09
UBQLN2	4.2187	1.37204e-07
UCHL3	6.28069	0.0259147
UGDH	4.90448	9.7686e-18
UGT2B15	6.80657	0.00198272
UGT2B17	6.80657	0.00198272
UQCRFS1	3.18518	5.49337e-12
UVRAG	10.735	1.11607e-32
VAT1	2.26125	0.00038288
VPS33A	3.24447	8.48008e-18
VTI1B	2.78262	0.000484951
WDR11	2.58504	4.03735e-14
WDR44	7.63469	3.11244e-06
WDR47	5.8953	3.6519e-06
WDR82	2.65664	0.021936
WIPI2	2.73336	0.000332613
WRNIP1	2.41884	8.5636e-28
YBX2	27.8387	8.47497e-16
YES1	2.02446	1.22651e-07

## Sheet: Table S2B
Table S2B : List of significantly enriched terms in the functional enrichment analysis on DEPs
Group	Pathway	p-value
BC	Neutrophil degranulation	0.00206805
BC	Pentose and glucuronate interconversions	0.00222324
BC	Platelet activation	0.00224362
BC	MHC class II antigen presentation	0.00307564
BC	Endocytosis	0.00428222
BC	Phagosome	0.00428222
BC	mTOR signaling pathway	0.00819693
BC	TCA cycle	0.00880822
BC	ErbB signaling pathway	0.00890886
BC	Galactose metabolism	0.00989797
non-BC	Vesicle-mediated transport	5.22769e-06
non-BC	RHO GTPase cycle	0.00016767
non-BC	Signaling by Retinoic Acid	0.000592819
non-BC	RHOC GTPase cycle	0.00193791
non-BC	Fc gamma R-mediated phagocytosis	0.00212718
non-BC	Integrin	0.00297096
non-BC	Signaling by Rho GTPases	0.00437845
non-BC	Pyruvate metabolism	0.00479351
non-BC	Thiamine metabolism	0.00501116
non-BC	Clathrin-mediated endocytosis	0.00720837

## Sheet: Table S2C
Table S2C : List of the upregulated protein (BC / non-BC ratio >1.5 or <0.66) overlap among BC tumor tissue and BC serum
	Fold change (BC/Non-BC)-serum	Fold change (BC/Non-BC)-tissue
A1BG	1.11442	0.220561
A1CF	0.58871	1.70337
A2M	0.914145	2.91229
A2ML1	0.530134	0.877925
A4GNT	2744.15	0.558164
AAAS	31.7691	3.35088
AACS	14.1047	0.406719
AADAC	2832.88	4.85835
AADAT	0.475577	0.584327
AAGAB	0.119442	1.988
AAK1	11.9248	1.03236
AAMP	0.689089	1.17529
AAR2	2.19042	0.939484
AARS1	0.952108	2.12105
AARS2	0.149982	1.19204
AASDHPPT	0.987646	1.99513
AASS	1.35525	0.441434
AATF	22.7943	0.626975
ABAT	0.774225	1.41085
ABCA3	0.760364	1.26995
ABCA6	4.08281	0.443185
ABCA8	10.1333	0.848414
ABCA9	1	0.625265
ABCB1	28.4842	3.075
ABCB10	641.118	0.91812
ABCB11	1.08309	0.393706
ABCB4	6.49733	149.642
ABCB6	2.50416	0.885413
ABCB7	0.479339	0.883077
ABCB8	1.12991	0.952324
ABCC1	2.7966	0.76378
ABCC2	3.96091	3.19465
ABCC3	0.920144	1.27141
ABCC4	6.05518	2.03308
ABCC5	97.4885	10.7636
ABCD1	1.76269	0.829747
ABCD3	0.821581	1.83078
ABCE1	0.825424	1.77962
ABCF1	8.55155	1.35947
ABCF3	0.0587362	1.34885
ABCG8	147.483	0.834246
ABHD10	3.40701	1.86147
ABHD11	1.74511	3.45999
ABHD12	0.891423	0.652751
ABHD14B	2.2735	0.84545
ABHD16A	4.20016	1.676
ABHD17C	2.57376	1.11826
ABHD2	1	0.425832
ABHD4	475.485	0.593075
ABHD6	1.54166	0.73817
ABI1	0.860654	1.62632
ABI2	1998.48	0.6922
ABI3	2.38731	7.07425
ABI3BP	1.15697	1.13696
ABL2	0.0818851	0.72881
ABLIM1	9.02994	1.13964
ABLIM2	63.4918	11.0777
ABLIM3	0.53368	0.817108
ABO	291.695	0.716438
ABR	0.573054	1.3661
ABRACL	0.345761	0.719596
ABRAXAS2	224.549	2.01258
ABT1	8.72772	1.02777
ABTB2	0.0801998	2.72205
ACAA1	17.1455	1.70045
ACAA2	1.92327	1.64867
ACACA	0.972873	4.49944
ACACB	0.971678	1.68774
ACAD10	0.00443438	0.773414
ACAD11	1.81759	1.21845
ACAD8	0.0506894	0.432346
ACAD9	3.29497	3.10312
ACADL	0.552393	0.918845
ACADM	2.57295	1.09271
ACADS	1.20264	2.89916
ACADSB	0.833609	1.6964
ACADVL	0.617554	1.691
ACAN	0.172921	0.792055
ACAP1	0.873183	0.273665
ACAP2	1964.4	0.945418
ACAT1	1.34319	2.63435
ACAT2	0.518504	1.94017
ACBD3	2.51029	71.0167
ACBD4	0.649136	0.890431
ACBD5	1.68478	1.01959
ACBD6	1	0.449274
ACE	1.19373	0.528548
ACE2	0.991878	1.20842
ACHE	1.06586	8.09086
ACIN1	1.53069	4.09211
ACLY	0.290897	6.98314
ACO1	0.962295	1.1844
ACO2	1.01199	2.2803
ACOT1	0.114585	1.55641
ACOT11	1.65275	1.79281
ACOT13	1.58545	0.495735
ACOT2	0.822975	0.409962
ACOT4	33.6124	1.03597
ACOT7	0.155236	3.92568
ACOT8	0.807635	7.4716
ACOT9	1.55341	1.39551
ACOX1	1.11319	2.17486
ACOX2	1.31893	69.7294
ACOX3	1.71374	0.888332
ACP1	0.648309	1.58236
ACP2	5.22269	0.764454
ACP3	1.14144	1.78099
ACP5	0.493587	1.50926
ACR	0.769634	0.581918
ACSBG1	1528	0.536007
ACSF2	43.5751	5.26828
ACSF3	1924.02	6.36661
ACSL1	2.69014	1.93568
ACSL3	1.10008	1.15781
ACSL4	1.01226	1.27243
ACSL5	0.470041	0.983676
ACSL6	0.476097	0.765477
ACSM2A	2.69105	5.25902
ACSM2B	92.7823	4.07169
ACSM3	1.29757	1.07063
ACSM5	4738.27	0.778863
ACSS1	2.12826	1.55094
ACSS2	0.104102	2.1724
ACSS3	0.972337	2.52434
ACTA1	1.33765	0.999255
ACTA2	1.2372	1.63201
ACTB	1.08656	0.438526
ACTBL2	0.858123	1.31186
ACTC1	1.30755	4.77799
ACTG1	1.08659	0.927878
ACTG2	1.24191	0.927544
ACTL6A	0.260689	0.844214
ACTL6B	0.101377	1.91043
ACTN1	0.980351	1.16026
ACTN2	0.711926	0.813852
ACTN3	0.729348	0.987411
ACTN4	3.2185	1.12392
ACTR10	1.77288	2.74856
ACTR1A	1.35346	1.43905
ACTR1B	0.661135	1.64195
ACTR2	1.95202	1.63203
ACTR3	5.32529	0.756418
ACTR3B	3.03174	1.34677
ACTR5	0.000278368	0.810206
ACTR6	0.445112	0.626179
ACVRL1	1.03708	0.517886
ACY1	3.54913	3.14642
ACY3	2.88391	0.704199
ACYP1	3228.01	3.02052
ACYP2	1	1.71753
ADA	1.99925	0.947174
ADA2	0.803552	0.619978
ADAM10	1.31861	8.03028
ADAM11	196.58	0.312542
ADAM15	151.127	2.33962
ADAM17	0.0142899	0.573806
ADAM22	0.00188737	0.854666
ADAM28	161.051	0.683246
ADAM9	1.00976	14.0925
ADAMDEC1	23.0367	0.299468
ADAMTS1	561.185	0.5766
ADAMTS13	0.82695	0.917342
ADAMTS4	0.342423	0.499407
ADAMTSL1	726.851	1.20218
ADAMTSL4	244.171	1.27627
ADAP1	3.15041	6.04449
ADAR	0.685722	1.25421
ADARB1	1.03013	2.41379
ADCK5	0.643039	0.920099
ADCY5	0.586423	1.15358
ADCY6	613.519	1.12998
ADCY8	0.000939367	0.523106
ADD1	3.5869	2.91871
ADD2	0.792903	1.66885
ADD3	1.62526	0.743237
ADGRB3	0.916128	1.04601
ADGRD1	1.24555	0.249402
ADGRE5	0.527321	0.720075
ADGRG1	0.00107856	6.91382
ADGRG3	388.899	5.39413
ADGRG6	0.976018	0.41549
ADGRL1	555.676	2.12493
ADGRL2	1.86402	0.649673
ADGRL3	0.57169	0.378773
ADH1A	0.596809	1.03519
ADH1B	1.95769	0.841924
ADH1C	1.51804	1.96665
ADH4	0.957338	1.06521
ADH5	1.47172	0.325318
ADH6	1.22941	13.1744
ADH7	1.90751	3.21676
ADHFE1	2.90026	39.6537
ADI1	2.66999	1.20763
ADIPOQ	0.874212	0.229394
ADIRF	1	2.04346
ADK	0.479464	0.901672
ADNP	0.749051	1.9997
ADPGK	1.77623	1.90371
ADPRH	1.78922	0.98327
ADPRS	0.160009	1.62185
ADRA2A	0.00303928	0.728176
ADRM1	71.6585	2.93391
ADSL	0.632423	0.7674
ADSS1	1333.29	1.29611
ADSS2	1.12529	7.18355
AEBP1	0.238044	1.87575
AFAP1	1.95512	1.07938
AFAP1L2	16.5311	0.355929
AFDN	2.79101	0.796956
AFF4	1	3.1844
AFG1L	1.08919	5.96012
AFG3L2	21.0486	0.707009
AFM	1.35332	0.478607
AFTPH	4.95246	1.08141
AGA	0.364615	1.52185
AGAP1	0.102032	0.518179
AGAP2	0.188186	0.466124
AGAP3	2302.93	2.05421
AGER	0.62857	2.37129
AGFG1	1.48554	0.792518
AGFG2	0.630883	2.87587
AGK	0.138758	1.27753
AGL	1.06018	1.57594
AGMAT	0.928229	0.27068
AGO1	36.3985	1.02708
AGO2	1.94378	1.38467
AGO3	4.79425	2.41644
AGO4	6.16247	0.339791
AGPAT1	1.96383	0.882254
AGPAT2	336.247	0.848789
AGPAT5	0.132313	1.20589
AGPS	0.240621	1.53196
AGR2	0.591851	2.01227
AGR3	1.00768	1.90671
AGRN	3.78032	1.8142
AGT	0.909628	0.343957
AGTRAP	1.16263	1.19934
AGXT	1.03227	2.4749
AGXT2	0.304338	0.729285
AHCTF1	3.25974	1.04735
AHCY	1.49632	5.41771
AHCYL1	1.85027	0.575245
AHCYL2	0.019495	2.08003
AHNAK	0.782529	1.3605
AHNAK2	0.314387	1.96524
AHR	1.31574	1.23601
AHSA1	0.310418	2.53616
AHSG	0.827704	0.753311
AHSP	0.881734	1.70145
AIDA	30.6786	0.421179
AIF1	1.07459	2.88719
AIF1L	2621.61	0.80355
AIFM1	5.81545	2.16908
AIFM2	0.707759	1.02366
AIG1	1553.04	2.20306
AIM2	74.4043	0.869382
AIMP1	0.287568	1.11038
AIMP2	0.197594	5.2779
AIP	1.62088	0.857467
AK1	0.172011	2.16851
AK2	0.975897	1.37514
AK3	9.0301	1.33
AK4	0.160275	1.73897
AK5	0.582338	0.799552
AKAP1	3.8941	0.73283
AKAP11	71.8682	1.8464
AKAP12	0.776322	0.559878
AKAP13	8.64738	0.89062
AKAP17A	8.00328	4.472
AKAP5	56.9499	3.01341
AKAP8	0.976142	1.1346
AKAP8L	2.2635	8.33243
AKAP9	0.588847	2.81116
AKNA	1	4.22838
AKR1A1	2.11504	0.921184
AKR1B1	0.931285	2.38499
AKR1B10	2.85818	2.67283
AKR1B15	2.37046	1.57309
AKR1C1	0.616183	0.571503
AKR1C2	1.05694	1.21577
AKR1C3	0.691688	1.01652
AKR1C4	0.0170144	1.21182
AKR7A2	0.716839	0.764832
AKR7A3	0.697034	3.27399
AKR7L	0.467461	0.586036
AKT1	427.547	1.67645
AKT2	802.769	0.778169
AKT3	101.804	0.733017
AKTIP	0.982467	0.979433
ALAD	0.117838	0.387985
ALB	0.988301	0.602534
ALCAM	1.28286	6.9426
ALDH16A1	4.76133	0.978566
ALDH18A1	0.824873	2.72585
ALDH1A1	0.85255	0.550537
ALDH1A2	0.827407	0.330968
ALDH1A3	0.840948	3.20791
ALDH1B1	0.729495	1.05656
ALDH1L1	0.82196	1.5084
ALDH1L2	1.62707	0.901876
ALDH2	0.996432	2.27287
ALDH3A1	3.55858	147.021
ALDH3A2	0.855273	2.70731
ALDH3B1	1.56428	1.32563
ALDH3B2	1.39241	0.522824
ALDH4A1	4.21467	0.681952
ALDH5A1	0.471971	0.912672
ALDH6A1	5.54478	0.933981
ALDH7A1	10.7148	0.683402
ALDH8A1	0.871389	12.2824
ALDH9A1	1.23725	7.66764
ALDOA	0.854866	4.04923
ALDOB	1.17561	4.84796
ALDOC	2.1683	2.31521
ALG1	1.07777	2.6268
ALG10	0.00821374	14.0356
ALG10B	0.00821374	14.0356
ALG11	5.36259	0.867707
ALG12	1779.82	1.37293
ALG13	1	0.906613
ALG14	5.31785	1.49896
ALG2	794.119	2.50741
ALG5	25.2864	0.800585
ALG6	1	6.56346
ALG9	0.00323526	2.5016
ALK	1	0.388597
ALKBH4	0.395751	1.12009
ALKBH5	220.682	0.400374
ALKBH8	284.914	1.72037
ALOX12B	0.244982	3.98452
ALOX15	0.129504	1.22687
ALOX15B	0.0101151	1.48613
ALOX5	1.38128	0.820476
ALOX5AP	1	0.954739
ALPG	0.0219088	0.403889
ALPI	14.2916	0.576869
ALPL	0.719142	1.21824
ALYREF	0.897637	1.21864
AMACR	1.80519	0.587258
AMBP	1.12282	0.482105
AMDHD1	419.847	0.549885
AMDHD2	3.386	3.58947
AMPD2	1.36463	1.83167
AMPD3	1.08555	1.013
AMPH	0.168404	1.65223
AMT	835.013	1.62124
AMY2A	1.03326	1.43611
ANAPC1	3.49787	1.21149
ANAPC13	0.530314	1.16001
ANAPC16	999.347	0.995163
ANAPC2	24.4025	1.11785
ANAPC4	47.1222	0.707883
ANAPC5	111.989	1.66137
ANAPC7	3.16719	0.59213
ANG	0.778373	3.10182
ANGPTL2	1.32799	1.01874
ANGPTL3	0.32608	0.730429
ANGPTL4	3.77446	1.40867
ANGPTL6	1	1.03508
ANK1	1.19299	1.47169
ANK2	1.13241	1.04705
ANK3	380.097	1.62781
ANKFY1	0.624073	1.54335
ANKH	2604.3	0.554346
ANKIB1	0.000172159	1.32235
ANKLE2	51.4504	0.586722
ANKMY2	30.9779	1.37805
ANKRD13A	0.200304	0.820245
ANKRD17	36.5657	0.460111
ANKRD2	451.304	2.49434
ANKRD22	0.00243233	0.603606
ANKRD27	527.857	1.11987
ANKRD28	0.717395	0.734094
ANKRD35	0.010816	0.841256
ANKRD44	0.370493	2.93929
ANKRD45	1	108.344
ANKRD50	0.685439	0.752879
ANKS1A	1.30967	1.03162
ANKS4B	0.120919	1.08361
ANKZF1	1	1.24972
ANLN	0.0055598	1.18629
ANO1	4770.56	0.71443
ANO10	1.03749	1.28304
ANO6	0.823602	2.9151
ANP32A	2.45478	1.51951
ANP32B	3.54363	38.3751
ANP32C	7.17263	1.46326
ANP32D	11804	1.25636
ANP32E	0.76111	1.0243
ANPEP	0.895771	0.994633
ANTXR1	3.3693	0.381042
ANTXR2	6.47612	1.26896
ANXA1	0.478647	0.798568
ANXA10	1.18068	31.3654
ANXA11	0.129143	0.790929
ANXA13	0.611587	1.65622
ANXA2	2.14424	40.6239
ANXA2P2	1.21636	0.904946
ANXA3	0.955451	0.480267
ANXA4	0.786203	2.60889
ANXA5	1.65485	0.962161
ANXA6	0.928616	4.8899
ANXA7	1.54443	1.41292
ANXA8L1	0.625772	0.524506
ANXA9	0.14197	3.97619
AOC1	2.22819	2.62619
AOC2	5.93504	1.36613
AOC3	1.24198	0.861856
AOX1	713.252	3.626
AP1B1	0.0299707	1.71996
AP1G1	2.61649	1.09053
AP1G2	1233.72	1.45356
AP1M1	0.25095	1.78005
AP1M2	0.134105	1.44273
AP1S1	1281.71	1.58264
AP1S2	0.00154182	1.4225
AP2A1	1.54073	0.954031
AP2A2	1.35923	1.25473
AP2B1	1.37803	1.75911
AP2M1	2.22608	0.72834
AP2S1	8.3387	2.9832
AP3B1	0.10256	17.4307
AP3B2	0.621162	0.160195
AP3D1	20.6024	1.24827
AP3M1	1.54605	1.33744
AP3M2	0.000603084	0.818487
AP3S1	1.99055	0.64466
AP4B1	48928.6	0.700661
AP4E1	3.70868	0.79442
AP4S1	439.567	4.27398
AP5B1	980.323	0.798764
AP5Z1	30.846	41.7902
APAF1	17.0569	0.630565
APBB1	0.474358	0.81623
APBB1IP	1.8911	1.0343
APBB2	574.141	24.9645
APCS	1.21198	0.741663
APEH	1.5781	1.08377
APEX1	0.818148	3.18786
API5	1.26314	2.0116
APIP	193.555	3.0172
APLP1	1.69994	10.8225
APLP2	6.2165	0.817888
APMAP	0.852639	1.93474
APOA1	0.945312	0.385857
APOA2	1.26073	0.278281
APOA4	1.02029	0.972042
APOA5	0.291913	0.436493
APOB	1.1173	3.86766
APOBEC3B	0.661559	0.829206
APOBEC3C	748.06	0.730473
APOBEC3D	5.66379	2.21065
APOBEC3F	2.44544	0.65356
APOBEC3G	24.9428	1.99271
APOBR	0.982065	0.970388
APOC1	0.972184	0.777652
APOC2	1.23449	1.2457
APOC3	1.07725	0.671123
APOD	0.989372	1.39397
APOE	1.10227	8.38513
APOF	1.07914	1.95751
APOH	1.26151	0.579826
APOL1	1.00194	0.353484
APOL2	13.1894	2.21388
APOL3	233.855	1.52597
APOM	0.910301	0.583724
APOO	0.759688	1.80821
APOOL	1	1.3331
APP	0.561216	1.88504
APPL1	1.82635	2.66523
APPL2	2.2959	1.00636
APRT	2.39945	0.899132
AQP1	0.451307	0.438395
AQP3	2164.83	4.13982
AQP4	1599.32	19.9678
AQR	0.534719	1.592
ARAF	0.492033	1.44853
ARAP1	0.720972	0.724414
ARAP3	0.503886	1.0798
ARCN1	0.608739	2.72042
ARF1	1.58057	1.23252
ARF3	1.58057	7.49923
ARF4	1.51494	2.24619
ARF5	7.22006	1.00307
ARF6	1.78317	1.47169
ARFGAP1	7.86523	1.34535
ARFGAP2	0.549401	1.53883
ARFGAP3	1.26187	1.91216
ARFGEF1	6.01132	4.61596
ARFGEF2	25.9714	3.71823
ARFGEF3	19.0432	0.813622
ARFIP1	2.61767	0.6517
ARFRP1	225.339	8.86699
ARG1	10.1819	0.78996
ARG2	3115.41	0.909173
ARHGAP1	1.14882	1.53188
ARHGAP10	203.382	0.54942
ARHGAP12	1.55873	0.576034
ARHGAP17	1.91037	1.38646
ARHGAP18	22891.1	0.652732
ARHGAP19	22975.7	0.500976
ARHGAP21	0.335314	1.05269
ARHGAP23	192.053	0.880523
ARHGAP25	0.0677989	0.667901
ARHGAP26	0.0384515	8.05006
ARHGAP27	2.89782	4.63964
ARHGAP29	76.3259	5.60769
ARHGAP30	5.24953	0.951048
ARHGAP31	557.226	1.07126
ARHGAP35	1.4262	1.21967
ARHGAP36	68.5149	14.3677
ARHGAP39	81.4179	4.25258
ARHGAP4	0.50423	0.82805
ARHGAP44	0.680423	0.671966
ARHGAP45	3.53264	5.60042
ARHGAP5	3.21954	0.648318
ARHGAP6	0.619715	1.67153
ARHGAP8	1.9115	0.887209
ARHGDIA	0.842792	1.76174
ARHGDIB	1.06721	1.73055
ARHGEF1	1.34281	1.03684
ARHGEF10	10.4632	0.911749
ARHGEF10L	4.71883	0.77653
ARHGEF11	1.07595	0.584169
ARHGEF12	0.444191	0.848393
ARHGEF16	2049.06	1.30393
ARHGEF17	1.15952	1.46681
ARHGEF18	0.87994	0.862295
ARHGEF2	1.52394	0.895951
ARHGEF28	156.035	0.718721
ARHGEF37	6.55119	8.08786
ARHGEF4	32.3638	2.64766
ARHGEF40	0.891933	1.66124
ARHGEF5	271.462	0.527362
ARHGEF6	0.959143	0.78316
ARHGEF7	0.87761	1.36355
ARID1A	0.301685	1.20521
ARID1B	457.511	1.25185
ARID3A	40.3769	1.09526
ARID3B	0.00360235	1.89912
ARIH1	0.660787	1.39675
ARIH2	0.0017323	0.533909
ARL1	2.48611	1.6425
ARL14EP	1	0.760741
ARL15	4.85613	0.904375
ARL2	0.953795	1.24314
ARL2BP	1967.87	1.16685
ARL3	1.06158	2.6973
ARL5A	0.000505845	1.04601
ARL5B	2.09851	1.04601
ARL6	0.658086	1.15648
ARL6IP4	2646.58	0.689412
ARL6IP5	1.88723	1.12268
ARL6IP6	399.289	1.67467
ARL8A	2.37336	0.692791
ARL8B	0.289907	0.619793
ARMC1	1.67583	0.790773
ARMC10	4.72011	2.04306
ARMC5	0.129217	0.754114
ARMC6	4.6409	2.55372
ARMC8	60.1875	4.39577
ARMC9	364.828	131.242
ARMCX1	0.599038	1.29764
ARMCX2	14.8313	0.6212
ARMCX3	0.142526	2.75999
ARMCX5	4097.37	2.01838
ARMH3	3.65755	1.15839
ARMT1	0.175161	3.37703
ARNT	0.00652067	2.33652
ARPC1A	0.721232	1.03003
ARPC1B	0.751911	1.92251
ARPC2	0.905916	8.23027
ARPC3	4.87681	0.843812
ARPC4	1.45482	2.38413
ARPC5	2.19118	1.47878
ARPC5L	3.33907	1.43738
ARPIN	1.14523	2.76455
ARR3	415.477	0.775933
ARRB1	2.92349	2.57021
ARRB2	137.82	0.603077
ARRDC1	939.739	1.25147
ARSA	1.83909	1.58479
ARSB	1.0068	0.296192
ARSD	4.9402	1.70356
ARSF	14.013	73.3289
ARSH	27.83	0.346199
ARSL	16.9034	0.576175
ART3	1.15185	0.885086
ARVCF	0.963042	0.937449
ASAH1	0.71884	2.72093
ASAP1	5.83297	2.54812
ASAP2	0.128644	1.48007
ASAP3	377.745	0.511631
ASCC1	13.8385	0.765823
ASCC2	0.735896	3.8353
ASCC3	0.897903	5.60935
ASF1A	0.686315	1.20187
ASF1B	56.1117	2.02684
ASGR1	0.00686788	0.512973
ASGR2	0.284741	1.02968
ASH2L	4.54491	0.410087
ASL	2.13412	3.6259
ASMTL	3.02821	1.06697
ASNS	1.78118	2.02265
ASPA	2.55515	2.6328
ASPDH	0.264121	0.747483
ASPH	7.44036	1.76903
ASPN	0.968755	1.42794
ASPRV1	739.743	1.4136
ASPSCR1	4.1025	2.77859
ASRGL1	3.0498	2.35561
ASS1	1.69711	1.82862
ASTN1	63.5025	0.526915
ATAD1	0.113874	0.848618
ATAD2B	0.33299	1.46833
ATAD3A	8.0108	1.00413
ATAD3B	0.54611	1.244
ATAD3C	12.5498	21.3464
ATAT1	1.55246	0.713504
ATE1	1.3675	0.58823
ATF6	0.17955	6.25251
ATF6B	1.64134	4.04473
ATF7	93.3801	0.978071
ATG101	2.07398	0.819056
ATG13	0.130176	0.830418
ATG16L1	3.87442	0.800265
ATG2A	355.495	0.57789
ATG2B	1.3924	0.609734
ATG3	0.497777	1.69932
ATG4B	0.227908	1.18732
ATG5	1.6083	0.967915
ATG7	1.32438	1.13309
ATG9A	0.617876	3.72921
ATIC	3.38928	0.945695
ATL1	1114.13	0.717385
ATL2	4.74211	1.03671
ATL3	0.334322	1.18234
ATM	23.5369	0.947348
ATOX1	9.7819	3.18611
ATP10B	1.02445	5.19275
ATP11A	0.220901	0.362709
ATP11B	0.00225594	1.2948
ATP11C	162.7	0.663387
ATP12A	0.0048169	0.399882
ATP13A1	3.87156	2.00219
ATP13A4	946.945	3.51546
ATP1A1	1.31214	1.18184
ATP1A2	1.13034	1.0831
ATP1A3	18.5086	1.20238
ATP1A4	0.154718	1.71863
ATP1B1	2.13527	1.84443
ATP1B3	5.25268	171.582
ATP2A1	0.310449	2.86909
ATP2A2	1.05831	1.87737
ATP2A3	28.5055	3.4963
ATP2B1	11.7359	1.25138
ATP2B2	0.15113	1.11608
ATP2B3	2.64114	0.724367
ATP2B4	24.146	2.706
ATP2C1	3.42177	0.453287
ATP4A	0.378506	1.12508
ATP5F1A	0.930885	2.31256
ATP5F1B	0.722835	1.25748
ATP5F1C	5.55677	1.57437
ATP5F1D	1.57379	2.11517
ATP5ME	6511.59	1.34242
ATP5MF	0.963142	1.00218
ATP5MG	1.10656	1.84923
ATP5MPL	16898.2	0.865333
ATP5PB	1.2158	1.40082
ATP5PD	1.45352	1.17235
ATP5PF	12.9391	0.940858
ATP5PO	2.29205	2.38791
ATP6AP1	1.83338	0.453234
ATP6AP2	0.685844	1.12182
ATP6V0A1	0.496179	1.16335
ATP6V0A2	1.20754	1.30628
ATP6V0A4	28.8382	0.814078
ATP6V0C	0.727921	2.24424
ATP6V0D1	18.6809	1.47734
ATP6V1A	1.53474	1.73171
ATP6V1B1	0.544134	0.742344
ATP6V1B2	0.935435	1.79142
ATP6V1C1	17.7937	2.03977
ATP6V1C2	1640.03	1.06041
ATP6V1D	3138.56	1.53163
ATP6V1E1	4.73889	2.12802
ATP6V1E2	1	0.631436
ATP6V1F	0.596646	0.535129
ATP6V1G1	611.793	1.61673
ATP6V1G2	0.77743	66.6655
ATP6V1H	35.5384	1.52556
ATP8	1260.47	1.59791
ATP8A1	258.577	2.05473
ATP8A2	43.5296	0.637086
ATP8B1	3.574	2.64374
ATP8B2	49.7042	0.544147
ATP8B3	42.3643	0.609746
ATP8B4	48.9311	0.280992
ATP9A	0.536132	0.873309
ATP9B	0.531629	0.738298
ATPAF1	0.342107	1.27195
ATPAF2	7.74054	0.631607
ATR	0.00284548	0.734515
ATRIP	157.102	0.434501
ATRN	1.0315	0.528574
ATRX	24.7712	0.684421
ATXN1	1	0.252287
ATXN10	0.944169	1.37421
ATXN2	0.471333	0.381421
ATXN2L	7.2476	1.01374
ATXN3	0.000356048	2.239
ATXN7L3B	620.634	0.654999
AUH	55.6111	0.834104
AUP1	0.00077778	0.769043
AURKA	1.57571	0.850249
AURKB	1.96371	0.748431
AVEN	6.7397	0.434401
AVIL	0.458498	1.19661
AVL9	0.0493245	0.738781
AXL	0.942192	0.196695
AZGP1	1.05113	0.541394
AZU1	1.18217	1.53311
B2M	1.1431	1.82186
B3GALT5	1	0.541582
B3GALT6	0.000499176	1.36245
B3GLCT	1.54338	0.686729
B3GNT2	0.812058	1.46195
B3GNT3	4.15034	2.00201
B3GNT6	0.476327	1.14841
B3GNT8	0.419674	0.675648
B4GALNT1	0.00615363	0.601973
B4GALT1	0.852075	1.28472
B4GALT3	2717.72	1.16871
B4GALT4	1	14.2911
B4GALT5	142.186	23.3816
B4GAT1	11.4262	0.751808
B9D1	5514.34	2.35819
BAAT	659.816	1.79426
BABAM1	0.653781	1.16382
BABAM2	132.012	1.22415
BAD	0.756686	228.217
BAG1	0.063075	1.11289
BAG2	0.902965	2.51838
BAG3	5.38636	2.95168
BAG5	0.537865	1.15806
BAG6	3.1422	4.13114
BAIAP2	0.0571481	1.36607
BAIAP2L1	0.243552	0.664913
BAK1	0.178341	0.415958
BANF1	0.227682	1.63977
BANP	0.0761709	9.89588
BASP1	63.8713	1.29025
BAX	2.67831	1.04512
BAZ1A	5.31639	2.04157
BAZ1B	3.8423	0.597543
BAZ2A	0.958795	0.684632
BBOX1	0.731591	1.68311
BBS1	129.194	0.836717
BBS2	2.64443	0.827447
BBS7	2.03199	273.976
BBX	3768.16	0.741041
BCAM	3.886	0.842459
BCAN	0.0962315	1.06596
BCAP29	0.22768	10.3092
BCAP31	0.727963	2.21911
BCAR1	14.9071	1.1455
BCAS1	1.05305	0.818186
BCAS2	0.348786	0.799936
BCAS3	9.22328	0.952056
BCAT1	2.40814	0.827171
BCAT2	8.30601	1.60114
BCCIP	0.245101	1.02069
BCHE	0.802009	2.26009
BCKDHA	6197.29	0.762613
BCKDHB	1.01061	1.28938
BCKDK	1.2696	0.637672
BCL10	1.6784	3.67843
BCL11A	16.3157	1.24729
BCL2	8.06033	0.489874
BCL2L1	0.0569804	0.913824
BCL2L11	0.66036	0.384455
BCL2L13	2.93348	1.55603
BCL2L14	0.000139862	11.7421
BCL2L2	1.45082	3.98595
BCL9L	36.1352	0.510983
BCLAF1	0.139722	0.846366
BCR	3.82232	0.536331
BCS1L	7.50136	1.21013
BDH1	3.5738	1.2511
BDH2	0.752128	1.69523
BECN1	596.694	0.986832
BEND3	1	0.993144
BET1	0.911362	0.707871
BET1L	1109.47	1.38207
BGN	1.65727	1.12681
BHMT	0.671996	1.8949
BHMT2	1.059	1.97752
BICC1	159.962	0.505395
BICD2	2.02206	0.969858
BICDL2	0.70939	0.684507
BID	0.4326	1.25627
BIN1	0.867734	0.698966
BIN2	2.16105	0.769976
BIN3	1.09872	2.79563
BIRC6	0.3032	0.874451
BLK	1	0.453906
BLM	203.825	0.801648
BLMH	1.38353	2.93285
BLOC1S1	1.29555	0.978922
BLOC1S2	484.468	1.81461
BLOC1S3	0.0379611	2.50308
BLOC1S4	0.143642	3.47914
BLOC1S6	0.439622	0.757322
BLVRA	0.453841	1.88384
BLVRB	1.3577	0.871466
BMERB1	151.736	0.733026
BMP1	1133.78	1.15827
BMP2K	4.25707	0.950078
BMP8A	8.44689	1.55903
BMPER	1	0.537819
BMS1	0.948174	1.16518
BNIP1	0.153969	1.72588
BOD1	1	1.01278
BOD1L1	1.1849	4.11532
BOK	48.9279	0.803275
BOLA3	0.00141028	87.8366
BOP1	0.210321	2.51301
BORCS5	1.74758	4.08523
BORCS6	3.62711	1.93967
BORCS7	1316.81	0.721714
BORCS8	17.5409	0.574348
BPGM	0.737278	0.988492
BPHL	3.49718	1.20127
BPI	0.745136	0.452777
BPIFA1	281.996	2.01963
BPIFB1	1.32972	0.81553
BPNT1	0.189311	0.843634
BPTF	1285.94	0.917869
BRAF	7.18719	0.506429
BRAT1	2.38954	0.272627
BRCC3	1.92049	0.894619
BRD1	0.242709	1.03707
BRD3	22.7552	0.662066
BRD4	0.000170357	1.3529
BRD7	0.136697	0.334336
BRD9	0.00200675	1.11618
BRI3BP	1.08234	1.96658
BRIX1	0.125624	1.84473
BRK1	0.721069	1.89689
BRMS1	1571.08	2.32112
BROX	1.26548	1.84502
BRSK1	78.6562	1.67582
BSCL2	0.0101076	4.72541
BSDC1	1.09786	1.06328
BSG	0.509886	1.59269
BSN	0.28915	0.930073
BSPRY	491.923	0.936051
BST1	0.273639	0.635886
BST2	1865.74	3.56729
BTAF1	7.60893	0.746063
BTBD1	1	0.943386
BTBD11	21.0046	0.371029
BTD	0.907652	0.544779
BTF3	0.972544	0.360709
BTF3L4	2.48558	28.2899
BTK	14.6647	0.832479
BTN2A1	1181.65	0.591211
BTN2A2	55.4882	16.5199
BTN3A1	246.184	0.841357
BTN3A2	1	0.232775
BTN3A3	1	0.706289
BTRC	48.3447	0.430694
BUB1B	1.10712	0.492586
BUB3	1.88963	1.50079
BUD23	0.679183	3.00891
BUD31	1.56928	1.42064
BYSL	1.17286	1.05978
BZW1	0.0896964	14.6601
BZW2	4.70219	36.4433
C11orf52	589.538	0.48011
C11orf54	0.578092	1.65286
C11orf58	1.25734	1.86771
C11orf68	1	1.06065
C11orf96	187.042	0.972119
C12orf4	964.343	1.47053
C12orf45	7.72152e-05	0.519142
C12orf57	4.19541	0.888187
C15orf48	1	1.77649
C16orf54	1	0.584413
C16orf89	16.7949	2.09485
C17orf49	0.570881	1.12008
C17orf58	2.06704	2.48101
C17orf75	0.00250434	2.45148
C19orf25	0.00141325	1.43456
C1GALT1C1	236.553	0.820714
C1orf116	996.123	2.72166
C1orf122	6665.72	0.831851
C1orf198	1.33733	1.80857
C1orf35	0.977736	14.6002
C1orf56	3.57507	1.08313
C1orf87	0.000229477	2.25558
C1QA	0.929378	1.24016
C1QB	1.01409	0.475827
C1QBP	0.53397	0.997545
C1QC	0.963843	0.968285
C1QTNF3	2.25194	0.913106
C1QTNF7	0.00327078	0.512987
C1R	1.14171	0.430845
C1RL	1.2555	0.588064
C1S	1.01893	1.31009
C2	1.58406	0.866008
C20orf27	1.09381	1.94045
C2CD2	0.596256	0.615571
C2CD2L	0.00149332	0.25909
C2CD5	0.611359	0.931451
C2orf49	453.34	0.365147
C2orf69	0.00110795	1.20606
C2orf72	1	1.61016
C3	1.10517	1.81087
C3AR1	356.953	0.44676
C3orf38	0.495761	0.527901
C4B	1.09271	0.986688
C4BPA	1.07698	0.862889
C4BPB	1.20918	2.03526
C4orf33	784.984	0.866398
C5	0.964861	1.00569
C5orf22	1482.22	0.370046
C6	1.05145	2.9067
C6orf132	1.02202	3.47197
C6orf58	0.23181	22.8186
C6orf89	0.0160141	0.836059
C7	1.00307	1.5749
C7orf26	0.0938146	1.24458
C7orf50	1350.25	0.706974
C8A	0.955208	2.62421
C8B	0.858091	0.716335
C8G	1.15252	1.12839
C8orf82	299.102	1.54291
C9	1.19868	0.972366
C9orf129	0.412561	0.595304
C9orf16	36117.9	1.33953
C9orf64	0.615378	1.06998
C9orf78	1472.11	0.80996
CA1	3.39464	1.45335
CA12	9.51076	1.61778
CA13	1	0.581598
CA2	1.3816	1.64242
CA3	1.81555	1.08773
CA4	0.545947	4.41481
CA5B	38.5452	0.883226
CA6	2571.75	1.1507
CA8	0.0779116	0.729711
CA9	1.93621	3.36269
CAB39	14.4827	1.30418
CAB39L	3421.02	0.857637
CACNA2D1	0.747578	1.11377
CACNA2D2	0.966352	1.63736
CACNA2D3	0.570516	0.659523
CACTIN	1.77143	0.865988
CACYBP	1.41797	3.89794
CAD	0.84465	3.15179
CADM1	1.16603	0.740979
CADM2	1.80527	0.61188
CADM3	0.553636	0.735438
CADM4	1.87975	3.36654
CADPS	0.529185	0.413379
CADPS2	2.17502	1.01161
CALB1	4.25546	60.8509
CALB2	0.231844	0.699327
CALCOCO2	2.02323	0.90323
CALD1	0.325856	2.06221
CALHM5	0.965247	0.548206
CALHM6	0.134703	1.36424
CALM3	1.14847	2.00032
CALML3	1.77211	1.02389
CALML4	2.95558	3.06742
CALML5	2.51302	0.932014
CALR	1.37875	2.7647
CALU	0.869409	1.4343
CAMK1	0.387706	2.3836
CAMK1D	2.47615	12.6348
CAMK2A	322.283	9.122
CAMK2B	336.795	2.33534
CAMK2D	0.898445	0.952501
CAMK2G	9.31367	1.48525
CAMK4	44.299	25.854
CAMKK2	0.236716	1.0441
CAMP	0.766758	1.67818
CAMSAP2	0.54656	1.09091
CAMSAP3	0.272512	0.489371
CAND1	1.51873	1.46806
CAND2	0.672427	0.835735
CANT1	2.68606	0.77977
CANX	0.769225	1.7287
CAP1	1.09924	2.43009
CAP2	2.76555	1.15475
CAPG	0.961841	2.58348
CAPN1	1.04018	0.803701
CAPN2	0.567683	3.85541
CAPN5	1.26565	0.683466
CAPN7	4401.55	4.40677
CAPN9	0.238302	0.673174
CAPNS1	0.772241	2.6576
CAPNS2	0.275095	1.30802
CAPRIN1	7.95909	2.17065
CAPS	0.811756	0.958486
CAPZA1	0.762399	1.49795
CAPZA2	0.997753	1.11639
CAPZB	5.003	2.94776
CARD11	6603.47	0.537595
CARD16	0.489671	0.830552
CARD8	262.466	0.193277
CARD9	0.45299	0.741562
CARHSP1	4.3201	1.61534
CARM1	1.19808	1.04167
CARMIL1	2.99943	0.837279
CARNS1	173.952	0.55801
CARS1	0.571896	4.56709
CARS2	0.896173	1.73641
CASC3	1473.16	0.688338
CASK	1.30751	1.46288
CASKIN1	165.917	1.35696
CASKIN2	2.56726	0.744514
CASP1	1.62509	1.2689
CASP10	0.421886	0.532553
CASP14	0.718881	1.42507
CASP2	5.174	0.471541
CASP3	1.11953	0.627637
CASP4	19.9383	1.61732
CASP5	0.797272	1.24676
CASP6	21525.8	1.82292
CASP7	563.212	0.769803
CASP8	4.44333	0.806208
CASP9	1006.25	0.48398
CASR	37.7453	28.5673
CAST	37.4116	0.816236
CASTOR2	4.24469	1.03748
CAT	1.23866	0.98813
CAV1	0.742085	0.412547
CAV2	1.36091	0.689569
CAVIN1	0.405631	1.62858
CAVIN2	4.16376	1.24864
CAVIN3	2.74973	2.70475
CBFB	10470.3	2.16144
CBL	3.99553	0.964576
CBLB	1.73436	9.93807
CBLL1	149.075	0.73402
CBR1	5.5792	1.15546
CBR3	0.233896	1.16284
CBR4	2.7199	0.602368
CBWD1	0.000563017	1.04601
CBWD2	0.000588595	1.04601
CBWD3	0.000588595	1.04601
CBWD5	0.000588595	1.04601
CBWD6	0.00084984	1.04601
CBX1	2.88632	1.9152
CBX3	0.599984	15.337
CBX5	33.827	5.19112
CBX7	41.1792	1.18245
CBX8	1208.88	0.883566
CC2D1A	0.0376751	2.43763
CC2D1B	6.13744	1.89788
CCAR1	2.40948	1.45156
CCAR2	0.939806	1.60747
CCDC115	139.246	2.07424
CCDC12	0.435185	0.919153
CCDC124	1.7786	2.95274
CCDC126	2.06564	2.7972
CCDC134	2.69334	1.45971
CCDC22	13.1681	2.63469
CCDC25	0.00313119	9.7751
CCDC28B	0.00145513	0.697307
CCDC43	0.940734	1.4167
CCDC47	1.59338	3.84314
CCDC50	0.366992	1.55446
CCDC51	2123.48	3.48711
CCDC58	28.7072	1.06814
CCDC6	0.60878	19.8097
CCDC61	1	0.877864
CCDC80	1597.46	0.601316
CCDC82	129.764	0.844154
CCDC86	0.802838	4.03968
CCDC88A	84.3749	0.829667
CCDC88B	0.570215	0.539721
CCDC88C	38.24	1.11494
CCDC9	0.000123591	5.28179
CCDC90B	34.6259	1.00089
CCDC93	2.05041	1.39226
CCDC97	2.1975	0.388206
CCL21	5.87766e-05	0.782647
CCM2	2.21762	0.992353
CCNDBP1	244.031	2.69024
CCNK	0.146902	0.533149
CCNL1	1.57473	1.12319
CCNY	45.0684	1.8645
CCS	1.29449	2.40904
CCT2	2.101	1.47818
CCT3	0.956318	2.98757
CCT4	2.51656	0.85755
CCT5	0.736203	1.82078
CCT6A	1.06025	1.17458
CCT6B	1.41144	0.607597
CCT7	3.0991	4.56835
CCT8	0.938276	2.12287
CCZ1B	5.50095	2.71067
CD109	0.875595	1.08013
CD14	0.553434	0.655077
CD151	315.467	0.8267
CD163	0.908113	0.97641
CD163L1	5.13152	0.55012
CD177	144.306	0.390746
CD180	0.000105423	0.900491
CD19	1	0.743997
CD1A	380.854	0.18948
CD200	0.533954	64.3531
CD207	2.80958e-05	0.216591
CD209	1	2.02581
CD22	9.63186	0.54985
CD248	22.9714	0.499005
CD276	1.39516	5.95904
CD2AP	18.1391	2.24071
CD2BP2	858.784	1.07537
CD300A	1270.3	1.19769
CD34	1.02048	0.669315
CD36	14.5537	0.836744
CD38	0.233653	4.74539
CD3E	1037.06	8.74401
CD4	1	0.663257
CD40	0.00152209	52.5515
CD44	1.08494	2.97502
CD46	57.1304	1.26725
CD47	1	12.769
CD48	30304.2	4.06548
CD5	1	1.51567
CD55	1.00661	0.614747
CD59	0.266451	0.906595
CD5L	0.669605	0.81532
CD6	0.819981	1.8355
CD63	0.534974	1.40655
CD68	3.23585	0.929483
CD74	0.553607	1.88228
CD81	1.76208	0.547351
CD82	21.7185	3.46268
CD84	0.64036	1.29489
CD8A	2.09493	0.840099
CD9	3.46883	2.0913
CD93	4.0743	1.18232
CD99	2.50278	2.28459
CD99L2	1.49492	14.9562
CDA	0.367716	10.1042
CDC123	0.0266968	0.996292
CDC16	0.00447847	0.335365
CDC23	0.656892	0.796439
CDC26	0.130213	0.377065
CDC27	386.317	0.805833
CDC34	379.88	1.14746
CDC37	3.83178	5.45273
CDC40	29.6631	0.738047
CDC42	3.70285	1.55043
CDC42BPA	0.980788	1.57769
CDC42BPB	14.1157	0.842539
CDC42BPG	0.5697	1.03067
CDC42EP1	42.2721	1.78203
CDC42EP2	0.430742	0.359915
CDC42EP3	400.146	0.773891
CDC42EP4	2.88728	1.31703
CDC42EP5	1.06145	1.16598
CDC42SE2	83358.7	0.572212
CDC5L	1.02782	2.36945
CDC73	1.14918	0.853119
CDCA2	80.9992	1.25159
CDCA3	852.764	0.556151
CDCP1	0.294074	1.3647
CDH1	2.51596	0.769662
CDH11	16.632	1.01249
CDH13	0.397293	0.940112
CDH16	0.434465	1.60386
CDH17	24.7245	0.679494
CDH18	67.5889	1.04601
CDH2	1.752	1.40688
CDH20	0.696456	0.531215
CDH3	0.778479	1.16652
CDH4	2.17225	0.121406
CDH5	0.742465	1.54991
CDH6	0.0285521	1.22875
CDH7	72.4622	0.950292
CDH9	86.9586	22.2378
CDHR2	0.957725	0.340168
CDHR5	1.75103	67.0981
CDIPT	0.143934	1.52564
CDK1	0.349087	1.01016
CDK12	0.0754096	1.07059
CDK13	0.00349988	0.41648
CDK14	0.000388299	0.557132
CDK15	0.00174901	11.2079
CDK16	0.00228596	1.49732
CDK17	0.609813	0.955609
CDK18	0.00201756	1.70722
CDK2	0.0609185	0.746448
CDK4	0.381184	1.10043
CDK5	19.9415	4.36933
CDK5RAP1	2102.43	1.32712
CDK5RAP3	7.05719	1.41545
CDK6	0.069614	1.02091
CDK7	1.28434	1.92937
CDK9	4.14471	1.13773
CDKAL1	1	0.808289
CDKN1B	0.359543	0.574345
CDKN2A	80.2203	2.8994
CDKN2AIP	1	3.42001
CDKN2AIPNL	0.00116017	1.18233
CDKN2C	5516.6	0.992641
CDR2	0.00330164	0.574336
CDR2L	391.658	1.19825
CDS2	3842.32	0.910914
CDSN	4.05808	1.10296
CDV3	0.00157036	1.2847
CDYL	0.340616	1.36585
CEACAM1	1.02774	5.51693
CEACAM3	987.352	0.48685
CEACAM5	0.652532	1.17951
CEACAM6	0.0843737	0.859247
CEACAM7	0.100952	8.1499
CEACAM8	0.859341	0.630481
CEBPD	805.498	2.44142
CEBPZ	6.26859	0.678421
CECR2	15.5327	0.559509
CEL	0.598668	3.66058
CELA3A	0.219899	0.930247
CELF1	5607.61	6.89759
CELF2	1.73357	1.15837
CELF4	1	0.336565
CELF5	1	1.04601
CELF6	1	0.665079
CELSR1	114.359	1.15877
CELSR2	0.783176	0.897271
CELSR3	2.48633	6.18028
CEMIP2	2.86382	0.598204
CENPB	4678.12	0.593381
CENPC	1	0.418382
CENPV	0.541976	1.80482
CENPVL1	0.000912771	0.746214
CENPVL2	0.000912771	0.746214
CEP120	481.834	3.88303
CEP135	159.638	3.98354
CEP170	1.40412	6.02825
CEP170B	0.119024	0.623093
CEP170P1	0.00369742	1.04601
CEP250	389.363	0.636226
CEP41	1	6.23345
CEP97	0.00607134	0.871817
CEPT1	0.105939	1.0491
CERCAM	0.00950237	0.965004
CERS2	883.837	2.03693
CERT1	8.38095	0.630492
CES1	1.11519	4.9242
CES1P1	1	64.8845
CES2	0.0451454	1.03004
CETN2	18.3463	1.20143
CETP	0.714191	0.941954
CFAP20	2.02124	0.919944
CFAP36	490.878	0.938354
CFAP410	0.00195923	0.536592
CFB	1.04709	4.32783
CFD	1.15661	0.465582
CFDP1	87.107	1.15919
CFH	1.10395	1.29616
CFHR1	1.10995	1.0755
CFHR2	1.51836	0.393434
CFHR4	1.33528	37.7684
CFHR5	11.2756	1.84791
CFI	1.00174	0.291432
CFL1	0.703021	1.44022
CFL2	1.1357	1.86624
CFP	1.0036	0.608843
CFTR	0.314463	0.45989
CGAS	422.341	0.244075
CGGBP1	2.09824	1.54197
CGN	0.429865	2.67585
CGNL1	34.9123	0.868988
CGREF1	0.384584	1.19605
CHAC2	1	0.960881
CHAD	0.775492	1.20485
CHADL	0.726227	1.2215
CHAF1A	0.151712	1.45596
CHAMP1	3.38533	6.04245
CHCHD1	3258.69	0.950389
CHCHD2	2.46121	0.846442
CHCHD3	1.16088	7.76903
CHCHD4	0.367455	1.80306
CHCHD6	0.0296023	0.447064
CHD1	3.39255	0.909397
CHD1L	0.000772894	0.804623
CHD2	2.93664	1.03184
CHD3	0.585617	0.808811
CHD4	1.8914	1.0011
CHD5	123.449	10.32
CHD6	4.05852	0.841623
CHD7	4.23269	3.99604
CHD8	2.77611	9.28628
CHD9	3.94733	1.12785
CHDH	0.113865	1.31272
CHEK1	0.000718158	3.45077
CHEK2	0.38237	1.16326
CHERP	0.752157	8.3624
CHGA	1.54533	20.0841
CHGB	1.12427	4.04643
CHI3L1	1.74037	0.516686
CHI3L2	8.36543	0.858672
CHID1	0.742434	0.962962
CHIT1	1.45737	0.384211
CHKA	2.42066	0.566318
CHKB	4.05501	0.792385
CHL1	1.10804	0.27659
CHM	1.48686	0.411338
CHML	190.105	0.86138
CHMP1A	49.1795	2.39966
CHMP1B	419.502	1.86192
CHMP2A	825.087	0.577581
CHMP4A	0.357577	1.40619
CHMP4B	5.34913	6.04249
CHMP4C	0.405427	1.343
CHMP5	1	2.83077
CHMP6	0.118938	1.69061
CHMP7	1.65565	1.26694
CHN1	1104.89	0.914284
CHN2	1.0086	1.47379
CHORDC1	0.707733	2.33373
CHP1	1.05843	0.972725
CHPF2	13.3264	1.13768
CHRD	1	0.453449
CHRDL1	432.416	1.10341
CHST12	208.871	0.947673
CHST13	0.459993	0.476293
CHST14	0.602303	1.00231
CHST15	0.639143	0.563441
CHST3	1	2.27493
CHTF18	14.0691	2.05166
CHTOP	1.02001	3.49941
CHUK	1733.43	0.329748
CHURC1	0.478052	0.0262015
CIAO1	10.0208	0.891751
CIAO2A	1.08974	0.877649
CIAO2B	7.07295	0.393488
CIAO3	565.198	3.39511
CIAPIN1	0.0154034	0.906286
CIB1	0.428214	1.28188
CIC	1.79838	0.425416
CILP	0.395762	2.55029
CILP2	0.837471	0.893307
CIP2A	0.101058	1.23207
CIRBP	0.885914	10.1429
CISD1	1	2.19395
CISD2	2.59034	0.981204
CKAP4	6.72534	2.16584
CKAP5	0.979567	0.985324
CKB	0.811193	1.91272
CKM	3.5238	1.51941
CKMT1A	0.8494	7.77044
CKMT2	0.595979	0.712404
CKS1B	9221.74	1.86268
CLASP1	1.02954	0.750918
CLASP2	68.7589	1.97493
CLC	2.05658	3.58862
CLCA1	0.989754	11.2281
CLCA2	1.06353	1.05204
CLCA4	0.23797	2.62891
CLCC1	791.686	2.4694
CLCN3	54.5256	1.40558
CLCN6	0.239604	0.833411
CLCN7	0.439641	0.69116
CLCNKB	1	1.04601
CLDN1	0.328083	1.26902
CLDN12	8582.51	0.404371
CLDN16	2100.42	0.0642944
CLDN3	3498.71	1.94283
CLDN5	1872.66	76.0699
CLDN7	41.8371	0.766221
CLDND1	2091.65	0.46502
CLEC11A	0.108422	1.25328
CLEC14A	0.424825	0.991997
CLEC16A	0.299066	0.871408
CLEC3B	0.982579	0.459986
CLEC4M	114.424	1.65127
CLGN	668.158	3.02161
CLIC1	5.41735	1.41749
CLIC2	0.775027	0.988365
CLIC3	0.345236	2.79488
CLIC4	1.68624	1.09422
CLIC5	2.25301	1.36643
CLIC6	3.43274	1.60222
CLINT1	0.625629	1.88469
CLIP1	1.07009	1.01402
CLIP2	2.5705	2.63297
CLK1	42.7409	0.29294
CLK2	1629.39	1.82545
CLK3	0.0666003	1.21098
CLK4	42.7646	33.1502
CLMN	2.08601	1.96209
CLN5	0.218017	0.992808
CLN6	1	6.67127
CLNK	0.612055	0.209695
CLNS1A	14.3399	2.37352
CLPB	7.52495	0.949628
CLPP	2.39839	1.59608
CLPTM1	1.08379	1.55344
CLPTM1L	0.655644	1.08589
CLPX	6.32566	3.20739
CLSTN1	1.02972	0.781346
CLSTN3	3484.27	1.06937
CLTA	62.7206	1.7455
CLTB	1.27947	1.55569
CLTC	2.34697	2.17598
CLTCL1	1.59764	0.917812
CLU	1.09153	2.76036
CLUH	9.16154	1.10171
CLVS2	1	1.011
CLYBL	0.658282	1.37569
CMA1	0.581312	0.495316
CMAS	0.93591	2.52967
CMBL	0.380926	30.5002
CMIP	0.00429335	1.21784
CMPK1	0.0750007	0.860268
CMPK2	1.47672	0.821025
CMSS1	0.33663	1.20817
CMTM6	1356.71	5.80727
CMTR1	1.42186	1.83165
CMTR2	1	0.736094
CNBP	0.99724	7.05926
CNDP1	1.08907	0.692759
CNDP2	0.678859	1.10452
CNIH4	8.39732	0.998781
CNKSR2	1385.17	2.39824
CNN1	7.40001	0.796701
CNN2	0.80286	4.29597
CNN3	0.196883	1.58855
CNNM2	0.233316	0.609065
CNNM3	0.0118835	1.08922
CNOT1	1.12588	2.49443
CNOT10	0.423588	1.95456
CNOT11	2.32516	2.85677
CNOT3	1.24471	2.51461
CNOT4	584.199	0.484397
CNOT6L	1	1.89126
CNOT7	7.03955	0.763619
CNOT9	178.35	6.01137
CNP	11.2039	2.2196
CNPY2	2.71873	1.41431
CNPY3	0.102286	1.09561
CNPY4	6327.53	0.728562
CNRIP1	7240.86	0.895003
CNST	137.303	1.92239
CNTFR	4.48316	1.22859
CNTN1	1.04228	0.349019
CNTN2	0.59012	1.38418
CNTN4	1	1.3778
CNTNAP1	18.3531	2.03842
CNTNAP2	1.68603	0.891168
CNTNAP4	517.412	0.93852
CNTROB	106.384	1.20943
COA3	3342.08	2.49188
COA6	2.76897	1.84623
COA7	6.77549	1.67098
COASY	31.7541	1.87496
COBL	1.09949	24.4099
COBLL1	0.825159	0.587231
COCH	4426.4	0.53721
COG1	0.68853	1.5219
COG2	4.96898	3.62211
COG3	0.940194	1.46558
COG4	1.5953	1.82867
COG5	1.46556	1.24168
COG6	3.55163	0.64339
COG7	0.200591	0.855451
COG8	0.41083	1.06734
COIL	2.71221	1.60011
COL11A1	2.135	0.442259
COL11A2	1.79199	2.84001
COL12A1	0.975115	1.9152
COL14A1	1.34518	0.239698
COL15A1	1.49204	1.12239
COL16A1	0.500454	0.817821
COL17A1	1.15898	1.8426
COL18A1	3.95476	1.45275
COL1A1	0.656541	0.569712
COL1A2	5.61693	1.99264
COL28A1	0.287517	10.9216
COL2A1	0.444919	0.507336
COL3A1	5.21656	1.51198
COL4A1	0.269292	0.930119
COL4A2	0.820268	2.921
COL4A4	170.534	0.781894
COL4A5	0.319401	0.375149
COL4A6	2.03381	0.392089
COL5A1	0.954937	1.03876
COL5A2	7.9284	0.2876
COL5A3	1.51162	1.37942
COL6A1	0.884768	3.75437
COL6A2	1.93015	0.259235
COL6A3	0.977917	0.50381
COL6A5	15.8489	1.18571
COL6A6	0.370494	0.126002
COL7A1	0.401469	0.832819
COL8A1	7.88859	0.697785
COLEC11	1.08106	0.271638
COLEC12	1.90768	0.885066
COLGALT1	3.2623	1.68451
COMMD1	0.533987	0.781417
COMMD10	6.24065	0.409888
COMMD2	5.4011	1.68211
COMMD3	2.7413	2.16951
COMMD4	1.29798	0.838534
COMMD5	7.31313	1.14134
COMMD6	2.94682	1.45132
COMMD7	1719.87	0.371999
COMMD8	1.70322	1.63254
COMMD9	0.951621	0.886718
COMP	0.713902	18.311
COMT	11.3372	1.24551
COMTD1	50.1815	1.44041
COPA	2.29379	3.23814
COPB1	0.691192	2.31987
COPB2	16.3786	0.912971
COPE	3.8456	5.56774
COPG1	0.435068	2.88278
COPG2	1.5662	1.36448
COPRS	2576.88	0.306249
COPS2	1.10798	1.61304
COPS3	2.21368	1.81568
COPS4	0.289356	1.32209
COPS5	2.83801	1.44022
COPS6	0.713105	0.443634
COPS7A	0.86095	1.42218
COPS7B	3.4476	5.05919
COPS8	1.61174	1.40693
COPZ1	275.12	2.06688
COQ10B	71.2807	0.816815
COQ3	5.63709	0.942756
COQ5	0.478624	1.04569
COQ6	0.152217	1.01193
COQ7	0.798856	5.32566
COQ8A	0.171938	1.968
COQ8B	2104.66	2.17024
COQ9	0.709186	4.0085
CORO1A	2.31381	2.7046
CORO1B	1.03192	2.52657
CORO1C	4.77112	1.90165
CORO2A	0.497667	2.31175
CORO2B	0.172245	0.864911
CORO7	0.847719	9.85895
COTL1	3.99884	2.15268
COX1	1.29358	2.06115
COX15	1.44867	0.796179
COX2	93.8166	20.9939
COX20	577.961	1.22108
COX3	2.99242	1.63241
COX4I1	1.92963	1.02228
COX5A	2.54238	0.461153
COX5B	4.49499	0.831709
COX6A1	4.46791	1.02123
COX6B1	0.536848	1.48005
COX6C	0.325881	1.35694
COX7A2	9187.87	1.05142
COX7A2L	608.475	3.55691
CP	0.934853	0.428085
CPA1	0.710642	4.64145
CPA2	6.40575	0.82713
CPA3	0.959183	0.317603
CPA4	3.60143	2.83087
CPB1	1.42703	1.33949
CPB2	0.942503	0.739006
CPD	0.84589	1.34299
CPE	4.79423	5.22131
CPEB2	126.242	0.972239
CPEB3	114.5	0.530737
CPEB4	107.823	1.82821
CPM	0.946521	0.49401
CPN1	1.05302	0.702703
CPN2	0.906687	1.18391
CPNE1	3.87415	1.11809
CPNE2	1.16816	0.502992
CPNE3	1.8489	9.79189
CPNE4	17.4868	0.708373
CPNE5	84.929	0.37909
CPNE6	1.67052	7.3622
CPNE7	15.258	0.504127
CPNE8	2.02437	1.06156
CPNE9	5.40691	0.539576
CPOX	54.1982	1.06606
CPPED1	1.65929	2.80477
CPQ	0.511162	0.342163
CPS1	0.599282	1.49642
CPSF1	5.37539	0.864524
CPSF2	3.24572	0.689378
CPSF3	589.268	1.36007
CPSF4	0.526196	1.17749
CPSF6	2.75109	0.685169
CPSF7	0.813	2.22825
CPT1A	16.4393	2.18466
CPT1C	781.794	39.3501
CPT2	10.6832	2.66638
CPTP	21.4291	1.4161
CPVL	0.69757	1.05817
CPXM1	1.3161	0.625561
CPXM2	0.224545	2.25824
CPZ	1	0.871285
CR1	1.7554	0.337024
CR1L	1	17.6165
CRABP2	2.38538	2.23489
CRACD	47.486	0.442269
CRADD	1.47525	0.738986
CRAT	0.341998	1.75905
CRB2	1	2.1174
CRBN	0.155566	0.902076
CREB1	0.655817	1.20075
CREBBP	0.412574	1.27817
CREG1	5.662	0.651061
CRELD1	4.95721	1.79384
CRELD2	1	1.23966
CRIP2	0.049594	1.25623
CRIPT	25157.1	0.555179
CRISP3	0.109402	0.385284
CRISPLD2	305.085	1.38457
CRK	1.27406	0.54915
CRKL	1.06457	1.31574
CRLF3	2.93654	8.28075
CRMP1	1.88282	0.900266
CRNKL1	0.783014	0.492954
CROCC	0.527683	1.0861
CROCC2	53.3632	5.14663
CROT	0.405856	0.724946
CRP	1.47356	0.466034
CRTAC1	0.922515	2.511
CRTAP	0.569745	0.83493
CRTC1	0.42782	0.716589
CRTC2	80.8566	1.4754
CRYAB	0.347908	0.598619
CRYBB1	207.944	0.803349
CRYBG1	3.64801	1.36922
CRYL1	2.88356	7.67036
CRYM	0.458557	0.956542
CRYZ	1.03498	0.792188
CRYZL1	0.00134642	1.53136
CS	2.08813	3.24523
CSDE1	67.5488	4.03914
CSE1L	0.828981	1.32758
CSF1	0.368214	0.889803
CSF1R	2.44891	10.7576
CSF2RA	7693.76	0.52649
CSK	0.864179	1.14881
CSMD2	131.226	0.699044
CSN1S1	0.749425	0.286408
CSN2	1.32097	0.385818
CSN3	0.839402	0.102477
CSNK1A1	1.79883	2.07388
CSNK1A1L	1.07972	49.6053
CSNK1D	0.372701	1.95478
CSNK1G1	1	0.889735
CSNK1G2	1234.72	1.74004
CSNK2A1	1.54629	0.916636
CSNK2A2	6.5726	0.854317
CSNK2A3	1.53165	0.472576
CSNK2B	143.069	0.744323
CSPG4	1.44312	1.38665
CSPG5	361.325	0.47873
CSRP1	0.998782	1.46187
CSRP2	0.0271383	4.81467
CST1	0.608051	1.00021
CST3	0.835113	0.95132
CST4	1.66691	1.47418
CST6	3.5683	0.940332
CSTA	1.47927	1.53193
CSTB	1.53411	1.11211
CSTF1	0.183619	1.13089
CSTF2	0.456252	1.4122
CSTF2T	0.162225	0.801042
CSTF3	1.52121	0.986511
CTBP1	2.96582	0.906117
CTBP2	0.958998	0.657598
CTBS	2.50528	1.83546
CTDP1	72.462	1.29901
CTDSPL2	1	1.10991
CTH	0.442339	1.42204
CTHRC1	443.095	19.3341
CTIF	0.000163636	0.912888
CTNNA1	0.809557	1.00374
CTNNA2	1.19941	1.59137
CTNNA3	1354.31	2.51605
CTNNB1	0.65716	3.63451
CTNNBIP1	982.465	0.801581
CTNNBL1	1.01993	0.647343
CTNND1	2.18191	1.41578
CTNND2	18.2206	1.62531
CTPS1	1.02827	0.899374
CTPS2	61.2697	0.80329
CTR9	17.1511	3.25029
CTSA	122.779	0.713174
CTSB	0.984422	2.02006
CTSC	0.666777	2.77476
CTSD	1.92593	1.83361
CTSE	0.365461	3.33633
CTSF	407.656	0.842306
CTSG	1.78939	29.6741
CTSH	1.66447	1.78374
CTSL	0.788591	1.11433
CTSS	1.74055	2.28103
CTSV	1	0.514141
CTSZ	5.28178	2.52373
CTTN	0.830911	2.8055
CTTNBP2	115.571	1.04803
CTTNBP2NL	0.000632308	0.753336
CTU1	262.08	19.6198
CTU2	1.45904	0.549657
CUBN	10.2867	0.698085
CUL1	0.307248	1.44295
CUL2	1.1888	2.52586
CUL3	0.0436662	1.16067
CUL4A	1.17283	3.64381
CUL4B	1.0972	2.52984
CUL5	0.28541	0.963552
CUTA	1.86461	1.07665
CUX1	0.952885	3.51032
CWC22	1.85998	4.38566
CWC27	4.95338	0.737723
CWF19L1	3.49378	3.51355
CXADR	0.573252	1.0978
CXCR5	59.3407	0.585299
CXorf38	1477.19	1.05554
CXXC1	1449.7	6.74634
CYB5A	0.218296	2.96489
CYB5B	0.76004	1.12858
CYB5R1	8.59743	1.3972
CYB5R2	38.9705	2.83653
CYB5R3	1.87269	4.10484
CYB5R4	1	2.62784
CYBA	3.85165	4.02704
CYBB	2.17311	0.976753
CYBC1	0.150872	0.950438
CYBRD1	1	0.742485
CYC1	48.2794	1.08833
CYCS	4.19334	2.69072
CYFIP1	0.963453	0.571291
CYFIP2	13.361	1.04685
CYGB	0.710411	1.8685
CYLD	63.5149	1.15339
CYP17A1	1	0.706128
CYP1B1	9.54597	0.900596
CYP20A1	1.9625	1.10918
CYP27A1	13.0408	1.67485
CYP2J2	2.21437	0.762738
CYP2S1	0.812875	1.55308
CYP3A4	1.26193	3.15974
CYP3A5	7.10988	40.9564
CYP4A11	6.86234	10.9232
CYP4B1	3.89899	1.14458
CYP4F11	1.25697	0.683094
CYP4F12	465.538	0.612234
CYP4F2	1.15706	0.61612
CYP4X1	0.00208486	1.11739
CYP51A1	1.34805	1.08255
CYP7B1	0.907301	0.589626
CYRIA	1.82256	0.706939
CYRIB	1.30159	1.3743
CYS1	1.66892	0.756803
CYSTM1	4542.04	3.7736
CYTB	2327.84	0.884572
CYTH1	0.445822	3.04379
CYTH2	295.774	1.1725
CYTH3	78.8943	0.507034
CYTH4	322.482	0.904417
CZIB	0.0234614	0.507293
D2HGDH	1.57458	0.969004
DAAM2	328.032	1.09041
DAB2	0.439024	1.12227
DAB2IP	560.835	0.823198
DACH1	0.107356	0.993029
DAD1	0.532971	1.33475
DAG1	1.85329	0.612867
DAGLA	1	1.36546
DAGLB	0.428759	0.647659
DAO	0.00171859	2.31229
DAP	1718.98	0.880819
DAP3	24.8141	3.71889
DAPK2	0.00255762	1.04708
DAPK3	2.74026	1.52258
DARS1	3.48068	8.60302
DARS2	1.23833	1.81103
DAXX	18331.7	0.730145
DAZAP1	6.84452	0.788165
DBH	0.827943	0.556095
DBI	1.49575	3.68748
DBN1	9.97474	1.07057
DBNDD1	821.536	1.12422
DBNL	0.915127	2.42261
DBR1	0.545739	1.12688
DBT	3633.53	3.83219
DCAF1	0.911276	0.857419
DCAF13	0.101967	1.06523
DCAF16	1	0.429894
DCAF5	61.3551	0.652274
DCAF7	459.641	0.441606
DCAF8	815.408	4.87772
DCAKD	1.0054	1.27174
DCBLD2	1.02882	0.388721
DCD	1.80143	2.56817
DCDC2	0.000943328	1.47975
DCHS1	0.00661417	1.05444
DCK	0.000124521	1.08962
DCLK1	1.06515	0.676165
DCLK2	816.009	1.37313
DCN	1.46451	0.461477
DCP1A	0.72254	0.878566
DCPS	0.767784	0.47285
DCTD	0.860345	0.67241
DCTN1	1.0752	1.19792
DCTN2	1.1133	1.35845
DCTN3	7691.44	0.367391
DCTN4	0.0484477	1.06391
DCTN5	2683.09	0.348524
DCTN6	0.000255413	0.87641
DCTPP1	13.7736	2.52371
DCUN1D1	0.888897	1.00349
DCUN1D5	0.295952	1.77043
DCX	1136.71	0.427838
DCXR	8.34954	1.93776
DDAH1	0.763983	3.08729
DDAH2	1.31598	1.16469
DDB1	0.927303	1.29113
DDB2	11.8865	0.76564
DDC	0.522124	4.80899
DDHD2	0.735028	1.60732
DDI1	1	39.0022
DDI2	7.50546	1.02206
DDN	1	1.14677
DDO	817.393	2.48469
DDOST	3.2034	1.49398
DDR1	0.578337	1.068
DDR2	77.0394	0.865302
DDRGK1	259.583	1.46862
DDT	1.86037	0.903573
DDTL	29.1714	0.549325
DDX1	2.42757	4.03654
DDX10	0.00495362	3.11523
DDX12P	18.5054	22.3367
DDX17	0.830272	1.12525
DDX18	0.658961	1.47603
DDX19A	0.815909	31.898
DDX19B	1.12871	0.759883
DDX20	1367.31	1.57383
DDX21	3.56798	1.74019
DDX23	2.38308	0.639727
DDX25	34.2574	1.11166
DDX27	14.783	1.48286
DDX39A	0.957864	1.58826
DDX39B	0.283179	1.715
DDX3X	1.74547	1.92368
DDX3Y	0.979458	0.612372
DDX41	1.16564	11.3512
DDX42	0.64917	2.85643
DDX46	1.06354	1.41453
DDX47	0.739181	0.987741
DDX49	4154.85	0.561722
DDX5	24.4549	1.54747
DDX50	9.30266	0.849744
DDX51	171.098	3.5928
DDX52	2.69022	0.751122
DDX54	0.00101564	0.385906
DDX55	4001.01	0.791412
DDX56	0.0114025	5.31355
DDX58	0.212869	2.28618
DDX59	1	1.02606
DDX6	4.02113	0.710665
DDX60	0.786155	0.745596
DECR1	0.986643	1.77286
DECR2	51.5267	3.45579
DEF6	0.33642	0.929319
DEFA3	394.898	1.04601
DEGS1	1.49889	4.02989
DEGS2	0.462837	0.762195
DEK	3.54825	0.5699
DENND10	1.26791	1.07867
DENND10P1	1.26791	1.04601
DENND11	646.514	0.770239
DENND1A	110.757	0.946897
DENND2B	1	1.09151
DENND2D	1.03852	1.15846
DENND3	1.69898	1.05456
DENND4A	144.682	0.931236
DENND4B	16.207	1.31845
DENND4C	0.0277674	0.610014
DENND5B	862.24	0.496354
DENR	0.902688	3.03108
DEPDC5	0.0193339	0.775854
DEPTOR	0.925623	1.40165
DERA	2.19898	1.62598
DERL1	0.00154865	2.51475
DERL2	419.25	1.1865
DES	0.525535	0.939122
DFFA	2.39113	0.799231
DFFB	1.1679	0.750478
DGAT1	0.87378	0.770198
DGKA	0.897252	1.56601
DGKK	1	0.560914
DGKZ	0.392275	2.06301
DGLUCY	3.10585	1.83647
DGUOK	0.500594	1.02393
DHCR24	3.15578	1.24988
DHCR7	197.216	1.16897
DHFR	1.01158	0.819464
DHODH	4289.58	1.32783
DHPS	15.0806	0.485336
DHRS1	234.528	1.73527
DHRS11	0.00828482	0.763374
DHRS13	1.21861	0.866965
DHRS2	0.000278272	1.35006
DHRS3	83.2834	4.5923
DHRS4	1.36323	3.63486
DHRS4L1	1.36324	2.38881
DHRS4L2	1	33.9869
DHRS7	1.91944	1.06308
DHRS7B	1.40863	1.65922
DHTKD1	1.5085	0.869653
DHX15	3.31737	2.23623
DHX16	4.6969	0.967054
DHX29	0.617908	0.743052
DHX30	17.4375	1.14313
DHX32	5.46106	0.679638
DHX35	1476.06	0.782761
DHX36	2239.58	0.816524
DHX37	0.30789	0.556549
DHX38	6.39191	1.79347
DHX57	1.64415	0.922017
DHX58	182.861	1.44169
DHX8	0.93478	0.783684
DHX9	0.235979	4.76921
DIABLO	1.34471	2.19041
DIAPH1	0.51844	4.22665
DIAPH2	2.68478	0.810314
DICER1	0.163191	0.876771
DIDO1	0.613585	0.885189
DIP2A	3.68195	1.25058
DIP2B	0.406543	2.14633
DIP2C	0.837203	0.412492
DIPK2A	1.08617	0.589461
DIRAS2	0.00294017	14.3082
DIS3	3.60567	0.854608
DIS3L2	2.21978	3.63376
DKC1	2.36924	1.36092
DKK3	0.872324	0.474242
DLAT	0.0258386	1.15939
DLD	1.42815	1.60247
DLG1	1.79544	5.04221
DLG2	1.14624	40.0056
DLG3	9.2013	3.5773
DLG4	1.07197	55.4265
DLG5	50.8226	1.0021
DLGAP1	31.9473	0.72744
DLGAP2	365.499	1.68108
DLGAP4	487.671	4.45301
DLGAP5	22.1119	1.61758
DLST	5.67608	1.87514
DMAC2L	2.83667e-05	1.29155
DMAP1	0.420647	0.763091
DMBT1	3.49709	2.86693
DMD	1.10969	2.07277
DMGDH	0.78957	13.5636
DMKN	0.704116	0.808286
DMPK	0.08833	2.39156
DMTN	1.35854	0.784917
DMWD	0.00314514	1.77139
DMXL1	575.352	0.894534
DMXL2	0.743756	0.927284
DNAAF5	0.477615	5.22674
DNAH6	1	1.52638
DNAI2	0.0249756	0.54447
DNAJA1	0.468598	3.68795
DNAJA2	12.1351	0.765298
DNAJA3	24.4025	1.28183
DNAJA4	0.00562661	2.77569
DNAJB1	0.936948	4.09031
DNAJB11	1.06018	15.6581
DNAJB2	91.4077	0.954144
DNAJB4	6.0025	6.58917
DNAJB6	11.6006	3.21398
DNAJB9	540.419	2.191
DNAJC1	1.44444	1.05087
DNAJC10	0.306812	0.849834
DNAJC11	0.761712	2.13745
DNAJC13	0.179372	0.921758
DNAJC17	76.7805	1.73791
DNAJC19	1	0.613701
DNAJC2	2.11264	0.369777
DNAJC21	349.094	0.652707
DNAJC3	2.83484	1.30271
DNAJC5	2.66962	1.04079
DNAJC6	0.151191	0.781264
DNAJC7	3.03421	0.93061
[truncated: 6,464 more rows]

## Sheet: Table S2D
Table S2D : List of significantly enriched terms in the functional enrichment analysis on DEPs between tissue and serum samples
Upregulated in BC between serum and tissue samples
p-value	pathway	members_input_overlap
3.14887e-08	Neutrophil degranulation	AOC1; ATP6V1D; ELANE; DYNLL1; ACTR10; HRAS; PSMD6; NIT2; RAP1A; SURF4; MGST1; ILF2; HGSNAT; PKP1; LTA4H; CYB5R3; XRCC5; IQGAP1; DERA; CPPED1; ARHGAP45; LPCAT1; CPNE3; COMMD3; GSDMD; COTL1; PA2G4; DOK3; ACAA1; MAPK1; S100A9; S100A8; DNASE1L1; RAB10; HEBP2; DSG1; RAB14; STK11IP; CTSH; RNASE2; DDX3X; GPI; RAC1; CTSD; ATP8A1; GALNS; ANXA2; CTSG; CTSZ; RAB3D; QSOX1; ARMC8; PYCARD; PLEKHO2; CYSTM1; ALD…
1.84212e-05	Glucose metabolism	NUP88; PCK2; PPP2R1B; PCK1; NUP62; GPI; ADPGK; NUP107; SLC25A1; GNPDA1; NUP85; PFKFB3; GOT2; AAAS; TPR; NUP155; PPP2R5D; ALDOC; NUP210; SEC13; SLC25A11
1.91129e-05	Phagosome - Homo sapiens (human)	ATP6V1D; TAP2; ATP6V1A; ITGA5; CORO1A; HLA-DRA; TUBB2A; RAC1; SFTPA2; SFTPA1; PIKFYVE; PLA2R1; TUBB3; ATP6V1H; CYBA; DYNC1LI2; SEC61G; HGS; CTSS; DYNC2H1; CLEC4M; TUBAL3; ATP6V1E1; TCIRG1; ATP6V1G1; STX18; ATP6V1C1; HLA-DMB; SEC61A1
0.000279924	Endocytosis - Homo sapiens (human)	HSPA2; PDGFRA; EHD4; VPS4B; CAPZB; HRAS; ARRB1; ARFGEF2; SNX1; DNM1; CLTC; DNM2; EPS15; AP2S1; RAB8A; ARF3; ARF4; PML; RAB10; CHMP4B; TGFBR2; CBLB; SMAP1; SH3GLB1; HGS; AGAP3; ARFGEF1; EPS15L1; CHMP1B; CHMP1A; ZFYVE27; KIF5C; LDLRAP1; ACTR2; CLTA; WIPF1; ASAP1; CDC42
0.000397419	Innate Immune System	AOC1; ELANE; DYNLL1; PPP3R1; NIT2; PKP1; CPPED1; PIK3CA; DCD; GSDMD; MAP3K7; COTL1; PA2G4; HEBP2; FGA; STK11IP; CTSH; RNASE2; DDX3X; GPI; TRIM25; CTSD; CTSG; TNIP2; CTSZ; CTSS; MUC12; ORMDL3; SNAP23; ADGRG3; BST2; HGSNAT; ATP6V1D; ATP6V1A; HRAS; QSOX1; UBE2D2; UBE2D3; MGST1; XRCC5; PCBP2; MRE11; SURF4; DNASE1L1; UBA7; NFASC; CYSTM1; RHOG; ATOX1; UBE2N; TCN1; PSMD13; TCIRG1; CYBA; ATP6V1G1; COMMD3…
0.000572921	Pentose Phosphate Pathway	GPI; PRPS1L1; G6PD; PGLS; RBKS; DERA
0.00100388	VEGF signaling pathway - Homo sapiens (human)	PTK2; RAC2; PPP3R1; RAC1; PIK3CA; HRAS; PRKCB; AKT1; MAP2K1; MAPK1; MAPK11; PPP3CC; CDC42
0.00209735	Immune System	AOC1; RNF14; ELANE; TAP2; DYNLL1; PPP3R1; RAPGEF4; AKT1; PTK2B; PKP1; PPL; CPPED1; GHR; COMMD3; DCD; GSDMD; MAP3K7; COTL1; PA2G4; OAS1; RNF114; HEBP2; FGA; STK11IP; CTSH; CBLB; RNASE2; DDX3X; GPI; TRIM25; TRIM26; JAK1; CTSD; CAMK2A; IFI30; CTSG; TNIP2; CTSZ; SEC24A; SEC24B; CTSS; MUC12; LRRC41; ORMDL3; SNAP23; EIF4G3; EIF4G2; ADGRG3; BST2; CD3E; MAGT1; NFATC1; BPIFA1; ATP6V1A; ENAH; QSOX1; UBE2D2…
0.00220302	Proteasome Degradation	UBA7; PSMD5; PSMD6; UBE2D2; UBE2D3; PSMD13; PSMB10; PSMA3; PSMA1; UBA1; PSMC4; PSMC5; PSMC6
0.00240056	T cell receptor signaling pathway - Homo sapiens (human)	DLG1; NFATC1; PPP3R1; CBLB; PIK3CA; HRAS; MAP3K7; CD3E; AKT1; MAP2K1; MAPK1; PTPRC; MAPK11; PAK4; MAPK8; PPP3CC; BCL10; CDC42
0.00336643	Glycolysis / Gluconeogenesis - Homo sapiens (human)	PCK2; PDHA1; ADH7; GPI; ACSS1; ALDH3A1; PCK1; ADH1C; ADPGK; GALM; ALDOC; LDHB; LDHC
0.00414683	Proteasome - Homo sapiens (human)	PSMB10; PSMC4; PSME4; PSMD6; PSMD13; PSMA3; PSMA1; ADRM1; PSMC5; PSMC6
0.0060467	Pentose and glucuronate interconversions - Homo sapiens (human)	UGT2B7; AKR1B10; CRYL1; DCXR; UGT2B10; UGT1A9; UGT1A7; UGP2
0.00805629	PPAR signaling pathway - Homo sapiens (human)	PCK2; CPT1A; CPT1C; GK2; ACSL1; SCP2; ILK; CYP27A1; ACAA1; PCK1; FABP3; CPT2; PLIN4
0.00829344	Fatty acid degradation - Homo sapiens (human)	CPT1A; CPT1C; CPT2; ADH7; ACSL1; ACAA1; ACAA2; ECI1; ADH1C
Upregulated in BC tissue samples
p-value	pathway	members_input_overlap
0.000276598	Peroxisome	MLYCD; CRAT; AGPS; PEX26; HMGCL; DAO; XDH; ECI2; MVK; NUDT19; EHHADH
0.00118781	Fatty acid metabolism	MLYCD; CRAT; ACADVL; ALOX12B; HADHB; PTGES3; MCAT; ACLY; ECI2; PRXL2B; PTGR2; MECR; ACOT7; NUDT19; EHHADH; ACOT1
0.0012329	Fatty Acid Biosynthesis	ACLY; ECHDC3; MECR; PC; ACSS2
0.00471993	Pyrimidine metabolism	DPYS; CDA; POLR2E; POLE; POLR1D; RRM1; DTYMK; POLR2C; UMPS
0.00519262	fatty acid beta-oxidation	HADHB; ECI2; HSD17B10; EHHADH
0.00599358	Folate metabolism	PKLR; GART; FTCD; PTS; QDPR
0.00698781	Glycolysis Gluconeogenesis	PKLR; PGM1; GLB1; PC; ENO3; GPT
0.00767217	Ribosome	RPL8; MRPL11; MRPL12; RPL5; MRPL16; RPL23A; RPLP2; RPLP0; MRPS9; RPL30; RPL31; RPL18A; FAU
0.00893692	Pyruvate metabolism	MLYCD; HMGCL; ACAT2; ACSS2; PKLR
0.00956464	Valine, leucine and isoleucine degradation	HSD17B10; HADHB; HMGCL; ACAT2; IL4I1; EHHADH
Downregulated in BC between serum and tissue samples
p-value	pathway	members_input_overlap
2.5527e-07	Ascorbate and aldarate metabolism	UGT1A10; KL; MIOX; UGT2B28; UGT1A5; UGT1A6; UGT1A3; UGT1A1; GUSB
8.35107e-07	Pentose and glucuronate interconversions	XYLB; UGT1A10; KL; UGT2B28; UGT1A5; UGT1A6; UGT1A3; UGT1A1; GUSB
0.000199137	Estrogen metabolism	UGT1A1; ARSL; UGT1A6; GSTA1; UGT1A3
0.00212965	RHO GTPase cycle	STARD13; WWP2; NCF4; ATP6AP1; DOCK6; SH3BP1; ARHGAP5; BCR; PREX2; WASF3; ITSN1; ARHGEF5; CDC42SE2; DSG2; TRA2B; GIT2; DST; YKT6; TRIP10; PLEKHG3; ANKLE2; RHPN2; ARHGAP12; ARHGAP10; ARHGAP18; ARHGAP19
0.00221661	Purine catabolism	NUDT9; NT5C; NT5E; NT5C1A
0.00289975	TNF-alpha signaling pathway	TRAF1; MAP4K2; TANK; PLK1; BTRC; CHUK; CASP9; KSR1; APAF1
0.00302132	RHOA GTPase cycle	PLEKHG3; STARD13; PREX2; RHPN2; ARHGEF5; ATP6AP1; YKT6; BCR; ARHGAP10; ARHGAP5; ARHGAP18; ARHGAP19
0.00322062	Steroid hormone biosynthesis	UGT1A10; UGT1A5; UGT2B28; UGT1A6; HSD11B2; UGT1A1; UGT1A3
0.00577502	Pyrimidine catabolism	NT5C; NT5E; NT5C1A
0.00659831	RAC1 GTPase cycle	PLEKHG3; PREX2; WASF3; NCF4; ARHGEF5; DOCK6; YKT6; BCR; ARHGAP12; SH3BP1; ARHGAP10; ARHGAP5; GIT2
0.00776627	Tyrosine metabolism	SLC6A2; UGT1A10; CYP4F12; AMACR; UGT1A5; UGT2B28; UGT1A6; UGT1A1; UGT1A3
0.00933164	RHOG GTPase cycle	PLEKHG3; ANKLE2; ITSN1; ARHGEF5; YKT6; DSG2; ARHGAP5
Upregulated in BC between serum samples
p-value	pathway	members_input_overlap
0.00194667	PI3K-Akt signaling pathway - Homo sapiens (human)	ITGB8; THEM4; BCL2L11; CDKN1B; COL1A1; TCL1A; COL4A5; EIF4E2; PPP2R2D; ITGA1; PDPK1; COL6A6; COL2A1; PPP2R5B; TSC1
0.00362601	Focal adhesion - Homo sapiens (human)	SHC3; ITGB8; COL4A5; RAPGEF1; COL1A1; ITGA1; PDPK1; MAPK9; COL2A1; COL6A6
0.00519083	ECM-receptor interaction - Homo sapiens (human)	ITGB8; ITGA1; COL4A5; COL1A1; COL2A1; COL6A6
0.00974428	FoxO signaling pathway - Homo sapiens (human)	MAPK9; BCL2L11; CDKN1B; IRS2; AGAP2; PDPK1; EP300

## Sheet: Table S2E
Table S2E : List of the serum protein panel (Student's t-test, p-value <0.05, BC/non-BC ratio >2) associated with neutrophil degranulation
Stages	Fold change (BC/Non-BC)	p-value
AOC1	2.22819	0.00140811
HRAS	3.24766	2.65004e-19
PSMD6	4.29873	0.00135713
NIT2	9.52774	1.44513e-06
RAP1A	13.6867	4.64217e-10
MGST1	2.93809	2.61932e-08
PKP1	5.79482	0.0182944
XRCC5	2.93437	2.87176e-07
COTL1	3.99884	6.19861e-06
PA2G4	13.7252	1.34049e-25
ACAA1	17.1455	1.60567e-14
HEBP2	5.20731	1.08918e-12
RNASE2	4.54676	1.37486e-06
ANXA2	2.14424	0.0367131
QSOX1	2.00607	0.0243893
ARMC8	60.1875	0.000390097
PYCARD	3.53984	0.00918787
ALDOC	2.1683	0.00129527
RHOG	7.11042	1.44491e-05
TCIRG1	4.84774	0.04167
CKAP4	6.72534	4.51221e-12
PPIE	9.46887	4.43967e-11
