# Supplementary material for: Proteome profiling of serum reveals PSMD6 as a biomarker in breast cancer metastasis
Source: Research Square preprint supplement (doi:10.21203/rs.3.rs-3634466/v1), 2023-12-11
Supplement: Supplementary file 2 [file 3a9cee587639ad7cdae8c8ff.xlsx]

## Sheet: Sheet1
Table S5	Correlation analysis between serum proteins and tumor progression. Related to Figure5
Sheet	Description
Table S5A	List of the serum protein panel associated with tumor metastasis
Table S5B	Hazard ratios of metastasis related proteins
Table S5C	List of the cis-effect protein panel (Spearman's correlation, p-value <0.05, rho >0.2) beotween IDC and MBC stages
Table S5D	List of the CLTA correlated pathway panel (Spearman's correlation, p-value <0.05, rho >0.2) between IDC and MBC stages
Table S5E	Upregulated pathway by ssGSEA scores and CLTA protein expression level (Student's t-test, p-value<0.05)between IDC and MBC
Table S5 F	Cibersort scores correlated with PSMD6 between IDC and MBC
Table S5G	List of the PSMD6 correlated pathway panel (Spearman's correlation, p-value <0.05, rho >0.2) between IDC and MBC stages

## Sheet: Table S5A
Table S5A : List of the serum protein panel associated with tumor metastasis.
Genes	color
ACADVL	MEgreen
ACP1	MEgreen
ADA2	MEgreen
ALDH3B1	MEgreen
ALDH3B2	MEgreen
ALDH7A1	MEgreen
ANXA3	MEgreen
APRT	MEgreen
ARMCX1	MEgreen
ATE1	MEgreen
ATP2B4	MEgreen
ATP6AP1	MEgreen
BCAR1	MEgreen
BCL2L13	MEgreen
BRAF	MEgreen
BSG	MEgreen
BTAF1	MEgreen
CALU	MEgreen
CAND2	MEgreen
CAPN2	MEgreen
CASP2	MEgreen
CDC42BPB	MEgreen
CLINT1	MEgreen
CLMN	MEgreen
COG1	MEgreen
COX5A	MEgreen
CPNE2	MEgreen
CPSF6	MEgreen
CSTF3	MEgreen
CTPS1	MEgreen
CTPS2	MEgreen
CYP51A1	MEgreen
DBN1	MEgreen
DDAH1	MEgreen
DDI2	MEgreen
DNAJC11	MEgreen
DNM1	MEgreen
DNM3	MEgreen
DOCK2	MEgreen
DTNA	MEgreen
DTNB	MEgreen
DUOX2	MEgreen
DYNC1LI2	MEgreen
EIF2S1	MEgreen
EIF3H	MEgreen
ELF1	MEgreen
EOGT	MEgreen
EPCAM	MEgreen
EPHX2	MEgreen
ESAM	MEgreen
ESYT1	MEgreen
EXOSC3	MEgreen
FBXO3	MEgreen
FCGRT	MEgreen
FERMT2	MEgreen
FNDC3A	MEgreen
GALNT2	MEgreen
GIPC3	MEgreen
GLG1	MEgreen
GSDMA	MEgreen
GSDME	MEgreen
HARS1	MEgreen
HKDC1	MEgreen
HLA-A	MEgreen
HPD	MEgreen
HSPA12A	MEgreen
HSPA4	MEgreen
HTT	MEgreen
IARS2	MEgreen
IBA57	MEgreen
IDH2	MEgreen
IPO5	MEgreen
ITGAL	MEgreen
ITPR3	MEgreen
KLC1	MEgreen
KLC4	MEgreen
KRT222	MEgreen
LEPR	MEgreen
LMAN2L	MEgreen
LNPK	MEgreen
LRBA	MEgreen
MAPRE2	MEgreen
MCCC2	MEgreen
MEF2D	MEgreen
MGAM	MEgreen
MRPS15	MEgreen
MRPS9	MEgreen
MYO6	MEgreen
NANS	MEgreen
NFKB1	MEgreen
NMT2	MEgreen
NOL3	MEgreen
NUDT5	MEgreen
NUP160	MEgreen
P4HA2	MEgreen
PCNA	MEgreen
PCYT1B	MEgreen
PGM5	MEgreen
PITHD1	MEgreen
PLBD2	MEgreen
PNLIP	MEgreen
PPIL3	MEgreen
PSMA2	MEgreen
PSMD2	MEgreen
PSMD4	MEgreen
PSMD6	MEgreen
PSMG4	MEgreen
PYGM	MEgreen
QDPR	MEgreen
RAD23B	MEgreen
RAP1B	MEgreen
RARS2	MEgreen
RBM39	MEgreen
RCN2	MEgreen
RMDN1	MEgreen
RPL22	MEgreen
RPTOR	MEgreen
SCG3	MEgreen
SEC31A	MEgreen
SF3B3	MEgreen
SLC27A2	MEgreen
SNX2	MEgreen
SP100	MEgreen
STOM	MEgreen
STOML2	MEgreen
STX8	MEgreen
SUSD2	MEgreen
SYTL2	MEgreen
TANGO2	MEgreen
TBC1D15	MEgreen
TBCE	MEgreen
TBK1	MEgreen
TJP1	MEgreen
TM9SF3	MEgreen
TMEM126A	MEgreen
TP53BP1	MEgreen
TRAM1	MEgreen
UBQLN2	MEgreen
VAT1	MEgreen

## Sheet: Table S5B
Table S5B : Hazard ratios of metastasis related proteins
	Hazard ratio	logrank p-value
PSMD6	2.55	0.0085
NANS	2.33	0.018
DNM1	2.21	0.028
EIF2S1	1.7	0.21

## Sheet: Table S5C
Table S5C : List of the cis-effect protein panel (Spearman's correlation, p-value <0.05, rho >0.2) beotween IDC and MBC stages
	p-value	rho
A1CF	0.0331666	0.293116
ABHD14B	0.00650713	0.369262
ABHD17C	0.00284385	0.40204
ABHD8	0.011844	0.343312
ABR	0.0170367	0.32648
ACOT8	0.0105347	0.348554
ACSBG1	0.0264327	0.304882
ACSL6	0.0185453	0.322421
ACSM1	0.0153587	0.331371
ACTR3	0.0383057	0.285409
ADAM7	0.00447412	0.384502
ADAP1	0.032721	0.293829
ADAR	0.0491076	0.27165
ADCYAP1R1	0.00182191	0.418409
ADGRB1	0.014174	0.335107
ADM	0.0305324	0.297458
ADNP	0.00976899	0.351886
ADRM1	0.0129118	0.339394
ADSL	0.0313686	0.296047
AFMID	0.031486	0.295851
AGPAT4-IT1	0.0149921	0.3325
AKT1	0.0338558	0.292027
ALDH1L1	0.0235637	0.310676
ALKBH7	0.0322943	0.294521
ALOX12B	0.00235615	0.409055
ALOXE3	0.0388259	0.284678
ANGPTL4	0.00929359	0.35407
ANKDD1A	0.0400694	0.282961
ANKRD13C	0.0270297	0.303744
ANKRD36C	0.0403262	0.282612
ANKRD61	0.0283114	0.301369
AOX1	0.00567464	0.374914
ARFRP1	0.000559387	0.458251
ARHGEF16	0.00707202	0.365777
ARMC6	0.0461292	0.275174
ASAP1	0.0172597	0.325861
ASCL3	0.0248578	0.307993
ASPN	0.0136753	0.336761
ATG3	0.0116044	0.344233
ATM	0.039169	0.284199
ATP1A1	0.0100045	0.350838
AZU1	0.00159653	0.423111
B2M	0.0223854	0.313228
B3GLCT	0.0404896	0.282391
BAIAP2	0.0198426	0.319149
BBS9	0.0471774	0.273913
BCL2	0.0182601	0.323166
BMPER	0.000679023	0.452033
BTRC	0.0324431	0.294279
C11orf96	0.0427438	0.279413
C16orf89	0.0277112	0.30247
C2CD4B	0.00185035	0.417853
C2orf72	0.00112147	0.435368
C7orf50	0.0465049	0.274719
C8orf82	0.00137949	0.428237
C9orf40	0.0411851	0.281458
CADM1	0.0134928	0.337379
CADM2	0.00634012	0.370343
CALML5	0.030243	0.297954
CAMSAP3	0.0187168	0.321977
CAPG	0.0292263	0.299728
CAPN2	0.00381831	0.390743
CAPZA1	0.00659065	0.368731
CATSPER2	0.000307319	0.476755
CBLL1	0.0117806	0.343554
CCDC126	0.045375	0.276096
CCDC13	0.0132112	0.338346
CCDC30	0.046773	0.274397
CCDC74B	0.0178453	0.324268
CCDC88A	0.0235768	0.310648
CCKAR	0.0494039	0.271309
CCL28	0.0253422	0.307019
CD46	0.0443453	0.277375
CD58	0.0064757	0.369464
CDC7	0.00114801	0.43457
CDK18	0.00664178	0.368408
CEP170B	0.0156095	0.330612
CFAP36	0.0165609	0.327823
CHCHD1	0.012457	0.341028
CHCHD4	0.0195835	0.319787
CHMP1B	0.0452531	0.276246
CHMP4B	0.0237515	0.310279
CHMP7	0.0103293	0.349426
CHST3	0.0465534	0.274661
CIB2	0.0119841	0.342781
CLCA1	0.0372985	0.286849
CLTA	0.0303639	0.297746
CNOT11	0.016085	0.329201
CNOT2	0.0131453	0.338575
CNOT7	0.00549925	0.376197
CNST	0.0342514	0.29141
CNTROB	0.0383098	0.285403
COL27A1	0.00653987	0.369053
COPS7B	0.0329107	0.293525
COPS8	0.0283936	0.30122
CPNE3	0.00473396	0.38225
CRABP2	0.000509346	0.461216
CREB5	0.00904594	0.355246
CRELD2	0.0233306	0.311172
CRY1	0.000385688	0.46986
CRYBG3	0.0123744	0.34133
CSNK2A3	0.0444696	0.277219
CTNND1	0.0271613	0.303496
CTR9	0.0405578	0.282299
CTSW	0.0247647	0.308182
CTTN	0.0136702	0.336778
CWF19L2	0.0394644	0.283791
CYP4Z2P	0.0279365	0.302054
CYP8B1	0.00938133	0.35366
DCLK2	0.0126798	0.340221
DCTN3	0.0389372	0.284522
DCTPP1	0.0354109	0.289637
DDAH2	0.0184548	0.322656
DDB2	0.0133708	0.337795
DDX50	0.00381129	0.390815
DDX56	0.00763761	0.362522
DEFA1B	0.0261617	0.305407
DEFA3	0.0261617	0.305407
DENND5A	0.0019761	0.415482
DESI2	0.00568687	0.374826
DHX36	0.0443042	0.277426
DNAJC19	0.00690321	0.366792
DNTTIP2	0.00150333	0.425231
DRAP1	0.0329217	0.293507
DUSP13	0.0427394	0.279419
DUXA	0.0454123	0.27605
DZIP1	0.00734626	0.364172
ECHDC1	0.0366617	0.287776
EIF2B3	0.0451833	0.276332
EIF4E2	0.0415453	0.28098
ELP3	0.0342032	0.291485
ENAH	0.0382284	0.285518
ENSA	0.0138904	0.336041
ENTPD3	0.0274757	0.302907
EPB42	0.0401963	0.282788
EPS15	0.035748	0.28913
ERAP2	0.0456423	0.275768
ERBB2	0.000810472	0.446251
ERBB4	0.0291217	0.299913
ERBIN	0.00432487	0.385848
ERC2	0.0455108	0.275929
ETV3	0.00808305	0.360103
EVI5	0.040137	0.282869
EXOSC3	0.0245474	0.308626
EXTL2	0.0485416	0.272306
EZR	0.000498863	0.46187
FADD	0.04559	0.275832
FAM104A	0.0174406	0.325364
FAM117B	0.00819511	0.359513
FAM118A	0.0044191	0.384994
FAM149A	0.0375463	0.286492
FAM160A2	0.0411591	0.281493
FAM219B	0.042664	0.279516
FAM227B	0.0455391	0.275894
FAM81B	0.00365494	0.392445
FAM8A1	0.0290967	0.299958
FBXO40	0.0203412	0.317939
FBXW11	0.00658948	0.368738
FCGR3A	0.0278191	0.30227
FEM1C	0.00388036	0.390114
FER1L4	0.00904743	0.355239
FH	0.0116479	0.344064
FKBP9	0.0294388	0.299353
FLAD1	0.0359525	0.288824
FLVCR1	0.0278926	0.302135
FNBP1L	0.00139647	0.427811
FNIP1	0.00621575	0.371165
FRRS1	0.0366813	0.287747
GALK2	0.0417634	0.280692
GAPDHS	0.0304415	0.297613
GCLM	0.000704615	0.450833
GDAP2	0.000979779	0.439938
GDI2	0.00113377	0.434996
GHR	0.0463621	0.274892
GLB1L2	0.0128264	0.339697
GLDC	0.0334317	0.292695
GLIPR2	0.0258723	0.305971
GLRX	0.0404384	0.28246
GLYCTK	0.0151635	0.331969
GNPDA1	0.0461578	0.275139
GNPNAT1	0.04424	0.277507
GPR27	0.00962801	0.352524
GPX4	0.0148888	0.332822
GRID2IP	0.0341216	0.291612
GRIP2	0.0103592	0.349299
GRM2	0.00187376	0.417401
GSN	0.0461383	0.275163
GSX1	0.0310762	0.296537
GTF2F1	0.0228076	0.312301
GZMK	0.0356326	0.289303
HACL1	0.0339444	0.291888
HAS1	0.0303134	0.297833
HBE1	0.0224824	0.313014
HDAC2	0.0436204	0.27829
HDLBP	0.0337091	0.292257
HECTD4	0.0428244	0.279309
HERC1	0.0148459	0.332957
HERPUD1	0.0487892	0.272018
HGD	0.0272634	0.303304
HHATL	0.0181452	0.323469
HID1	0.0215757	0.315049
HLA-DPA1	0.0492778	0.271454
HNRNPAB	0.000938016	0.441398
HOXA13	0.0266218	0.30452
HS3ST3A1	0.0270311	0.303741
IBA57	0.0452531	0.276246
IGFBPL1	0.0252444	0.307215
IL17RE	0.0292525	0.299681
IL18R1	0.0464623	0.274771
IMPDH2	0.002718	0.403741
INO80D	0.00542794	0.376729
IQCF3	0.00187376	0.417401
IQCH	0.000734084	0.449498
ITGA11	0.0134848	0.337406
ITGAV	0.0153322	0.331452
ITGB3	0.042659	0.279523
ITPKC	0.0499828	0.270647
JAGN1	0.0300128	0.298351
KAT2B	0.0264391	0.30487
KAZN	0.0228389	0.312233
KCNC2	0.0488351	0.271965
KCNG3	0.00786233	0.361287
KCNH8	0.00441634	0.385019
KCNK1	0.0173278	0.325673
KDELR2	0.0172669	0.325841
KIF3A	0.0173401	0.32564
KIFC2	0.0278521	0.302209
KLF2	0.0452024	0.276308
KLHL25	0.000462239	0.464258
KRR1	0.0395314	0.283698
KRT18	0.00948571	0.353176
LEPROT	0.0334528	0.292661
LGALS3	0.0061566	0.37156
LIMS1	0.0185117	0.322508
LINGO3	0.0372627	0.286901
LNX2	0.0136594	0.336814
LOXL2	0.00905732	0.355192
LPIN2	0.0110179	0.346557
LRRC27	0.0127662	0.339912
LRRC70	0.0474733	0.273561
LRRD1	0.0496198	0.271061
LYPD8	0.00781921	0.361522
MAGEL2	0.0146987	0.333421
MAN1A2	0.0197278	0.319431
MAP7D1	0.0469748	0.274155
MATK	0.0246262	0.308465
MBD4	0.0230737	0.311724
MCUR1	0.0384485	0.285207
MDH1	0.00453912	0.383928
ME1	0.00926482	0.354205
MED20	0.00832912	0.358816
MED21	0.023428	0.310964
MEF2A	0.00270866	0.403871
MEF2D	0.0488287	0.271972
MEN1	0.0105652	0.348426
MIIP	0.0443319	0.277391
MLEC	0.0350043	0.290253
MMP13	0.0135977	0.337022
MOCS2	0.0472558	0.27382
MPDZ	0.0193248	0.320432
MRC2	0.0142441	0.334879
MRPL17	0.0221526	0.313746
MRPL54	0.0451506	0.276372
MRPL9	0.0349024	0.290408
MRPS14	0.0432271	0.278791
MTF2	0.0399595	0.283111
MUC20	0.0475367	0.273486
MYO1C	0.0491378	0.271615
MYO1E	0.0124093	0.341202
MYOM3	0.0218804	0.314357
NACC2	0.0207423	0.316984
NAGK	0.0459406	0.275403
NAT1	0.00212959	0.412764
NBPF11	0.0187654	0.321852
NCEH1	0.0453423	0.276136
NCL	0.0287029	0.300661
NCSTN	0.000363196	0.471698
NDC1	0.0206176	0.317279
NENF	0.0301563	0.298103
NEO1	0.00188376	0.417209
NFX1	0.00341967	0.395016
NKX2-5	0.0498412	0.270809
NOL4	0.0162809	0.32863
NOS1	0.0114185	0.344958
NPC1L1	0.0264391	0.30487
NPEPPS	0.0241728	0.309398
NPIPB11	0.0376867	0.28629
NR1H4	0.0497819	0.270876
NRGN	0.00588585	0.373415
NUDT16	0.0430071	0.279074
NUDT4	0.0353687	0.2897
NUMB	0.0411029	0.281567
NXN	0.0232611	0.311321
NXPE4	0.0216492	0.314881
OGFR	0.0403746	0.282546
OLFML3	0.014098	0.335356
OR2L8	0.0093123	0.353982
OR2T6	0.00273031	0.403572
OR4S1	0.0219755	0.314143
OR52B2	0.0265618	0.304634
ORAI1	0.0382772	0.285449
ORC4	0.0252305	0.307243
OXNAD1	0.0246095	0.308499
P4HA3	0.021315	0.315647
PACS2	0.0490484	0.271718
PAIP1	0.0371514	0.287062
PAPOLB	0.0104473	0.348923
PCMT1	0.00583304	0.373785
PCNX3	0.0492078	0.271534
PCTP	0.0198374	0.319161
PDE3B	0.00837106	0.3586
PDGFA	0.010135	0.350266
PDIA6	0.0013037	0.430199
PEBP4	0.000170173	0.494043
PHB	0.0457036	0.275692
PHKB	0.0100228	0.350757
PHYHD1	0.0169911	0.326607
PI4KB	0.0109451	0.346853
PIN1	0.0298803	0.298581
PITX1	0.0469028	0.274241
PLEKHG4	0.020358	0.317899
PLIN3	0.0250035	0.307699
PLVAP	0.049867	0.270779
PNMT	0.0413475	0.281242
PNPT1	0.030444	0.297609
POC1A	0.0171939	0.326043
POGZ	0.00739927	0.363867
POLR1E	0.00412803	0.387687
PPCDC	0.0425085	0.279718
PPP1R12A	0.0082436	0.35926
PPP1R12B	0.0469121	0.27423
PPP1R1B	0.00579209	0.374075
PRAMEF12	0.00127694	0.430916
PRAMEF8	0.031932	0.295114
PRCP	0.0316596	0.295563
PRDX3	0.0242671	0.309203
PRKAR1B	0.0359525	0.288824
PRPF38B	0.00231729	0.409668
PRPF8	0.011575	0.344347
PRR15	0.0014091	0.427497
PRR36	0.00119334	0.433245
PRRC1	0.0424104	0.279845
PRTG	0.0102636	0.349709
PRUNE1	0.0108367	0.347297
PRUNE2	0.0226204	0.31271
PTBP1	0.0260931	0.30554
PTPN21	0.00524881	0.378092
PTX3	0.0137434	0.336532
PURB	0.0313963	0.296001
PUS1	0.0224065	0.313182
PYCR1	0.00805267	0.360264
PYGO1	0.00628989	0.370673
QKI	0.0492078	0.271534
RAB11FIP2	0.0267209	0.30433
RAB44	0.0222554	0.313517
RAB7A	0.0106069	0.34825
RAC2	0.00264067	0.404822
RADIL	0.0256627	0.306383
RALB	0.0100137	0.350797
RANGRF	0.0126538	0.340315
RAPGEF4	0.0312301	0.296278
RBM44	0.0247022	0.308309
RCN2	0.0201212	0.31847
REG4	0.00896535	0.355635
RELA	0.0259167	0.305884
REV3L	0.0410472	0.281642
RHBDD1	0.0106371	0.348124
RNF216	0.00850164	0.357933
RNF8	0.0393686	0.283923
RNPEP	0.00280214	0.402596
ROR1	0.0323853	0.294373
RPAP2	0.001757	0.419707
RPE	0.0319803	0.295034
RPL23A	0.00406841	0.388259
RPLP2	0.0458265	0.275542
RPP25L	0.0379083	0.285973
RPS6KB1	0.0162254	0.328791
RPTN	0.0137574	0.336485
RRAS2	0.0458265	0.275542
RSBN1	0.0332754	0.292943
RUFY2	0.00907806	0.355092
S100PBP	0.0250035	0.307699
S100Z	0.0129232	0.339354
S1PR4	0.0237162	0.310353
SAFB	0.0241176	0.309513
SCAMP3	0.00585238	0.373649
SCAPER	0.0128663	0.339556
SCO1	0.0210598	0.316239
SDR39U1	0.0465049	0.274719
SEC22B	0.0014913	0.425513
SELENBP1	0.00374633	0.391485
SERPINA6	0.0458447	0.27552
SERPINB5	0.0153653	0.331351
SERPINF1	0.0381675	0.285605
SERPING1	0.0250682	0.307568
SETDB1	0.000615729	0.455187
SF3B1	0.0175737	0.325001
SFMBT1	0.00344406	0.394743
SH2D7	0.0139979	0.335685
SH3BP5	0.0199441	0.3189
SHISA4	0.0436425	0.278262
SIGMAR1	0.0437926	0.278071
SIX4	0.0361889	0.288473
SLC1A3	0.007274	0.364589
SLC22A12	0.00261175	0.405233
SLC25A10	0.0424501	0.279794
SLC26A6	0.0312685	0.296214
SLC29A4	0.0372946	0.286855
SLC2A5	0.0479902	0.272951
SLC30A9	0.0371514	0.287062
SLC35F3	0.0465095	0.274714
SLC9A3R1	7.27983e-05	0.517367
SMIM4	0.000388319	0.469651
SMYD3	0.00960876	0.352612
SND1	0.0329973	0.293386
SNRNP35	0.0357019	0.289199
SNRPE	0.021338	0.315594
SNX14	0.0237044	0.310378
SNX27	0.010778	0.347539
SOGA1	0.0199223	0.318953
SPAG17	0.00665986	0.368295
SPATA1	0.0189717	0.321324
SPATA31D1	0.0429671	0.279125
SPCS1	0.0490679	0.271696
SPEG	0.00295714	0.400564
SQSTM1	0.00687915	0.366939
SRGAP2B	0.0144814	0.334113
SRGAP3	0.021919	0.31427
SSBP2	0.010206	0.349958
SSUH2	0.0123214	0.341524
STAT1	0.0165491	0.327857
STAU1	0.00206689	0.413853
STRA6	0.0233855	0.311055
STT3A	0.0209191	0.316568
STUM	0.0381147	0.28568
SUFU	0.0381553	0.285622
SUMO2	0.00515975	0.378785
SUPT20H	0.00415785	0.387404
SURF4	0.0371236	0.287102
SVIL	0.0381918	0.28557
SYNGR1	0.022913	0.312072
SYNGR2	0.00130403	0.43019
TATDN3	0.0397281	0.283428
TCAIM	0.0302699	0.297908
TCHHL1	0.0316109	0.295644
THYN1	0.0452633	0.276233
TLCD1	0.0261202	0.305487
TMEM102	0.0446957	0.276937
TMEM104	0.00107615	0.43677
TMEM132C	0.0278641	0.302187
TMEM41A	0.0137714	0.336438
TMOD3	0.0282893	0.301409
TNFRSF1B	0.0326637	0.293922
TNFSF13	0.0497705	0.270889
TNKS2	0.00290836	0.401194
TNNT2	0.045581	0.275843
TOM1	0.00309009	0.398895
TOMM20	0.0394393	0.283825
TOPAZ1	0.0427525	0.279402
TPH2	0.0333801	0.292776
TPM1	0.0224219	0.313148
TRIL	0.00977481	0.35186
TRIM22	0.0372707	0.286889
TRIOBP	0.0154293	0.331156
TRPM3	0.0411851	0.281458
TSPAN33	0.0458687	0.275491
TSPAN4	0.00389483	0.389969
TTLL3	0.0397239	0.283433
TTLL7	0.0484834	0.272374
UACA	0.0302056	0.298018
UBAP2	0.0387683	0.284758
UBE2M	0.0474963	0.273534
UBE2Z	0.0072955	0.364465
UBIAD1	0.00369617	0.392009
UFC1	0.0343034	0.29133
UGGT1	0.0406733	0.282143
UGT2B10	0.043075	0.278986
UHMK1	0.0454496	0.276004
UNC80	0.0427351	0.279424
UPF2	0.0378397	0.286071
USP14	0.00918802	0.354568
USP22	0.0112149	0.345765
VCP	0.0406433	0.282184
VPS28	0.0496694	0.271005
VPS35	0.0101595	0.350159
VTCN1	0.014801	0.333098
VWA2	0.0104663	0.348843
WDFY1	0.0282062	0.30156
WIPF3	0.0310043	0.296658
YAP1	0.0264924	0.304768
YIPF5	0.0143519	0.334529
ZACN	0.00651227	0.36923
ZC3H11A	0.022519	0.312933
ZC3H4	0.0250205	0.307664
ZC3HAV1L	7.91301e-05	0.51515
ZDHHC22	0.0219755	0.314143
ZFAND2B	0.019503	0.319987
ZFP91	0.0089746	0.355591
ZMAT4	0.0242177	0.309305
ZMYND10	0.00311902	0.39854
ZNF160	0.0281024	0.30175
ZNF20	0.0482355	0.272663
ZNF254	0.0440522	0.277743
ZNF266	0.0208874	0.316642
ZNF304	0.0207306	0.317012
ZNF385C	0.0212627	0.315768
ZNF423	0.00256531	0.405902
ZNF425	0.0382284	0.285518
ZNF445	0.0258107	0.306092
ZNF460	0.0141719	0.335114
ZNF501	0.0397827	0.283353
ZNF516	0.0192342	0.32066
ZNF567	0.0201905	0.318302
ZNF618	0.0245868	0.308545
ZNF638	0.00204306	0.414274
ZNF71	0.0188424	0.321655
ZNF721	0.0237162	0.310353
ZNF770	0.0124607	0.341014
ZNF814	0.0195484	0.319874
ZSCAN12	0.0165774	0.327776
ZSCAN2	0.0458641	0.275496

## Sheet: Table S5D
Table S5D : List of the CLTA correlated pathway panel (Spearman's correlation, p-value <0.05, rho >0.2) beotween IDC and MBC stages
	p-value	rho
HALLMARK_OXIDATIVE_PHOSPHORYLATION	5.23536e-13	0.592505
HALLMARK_MYC_TARGETS_V1	2.66128e-12	0.577627
HALLMARK_PROTEIN_SECRETION	4.87322e-12	0.571894
HALLMARK_MTORC1_SIGNALING	5.15413e-11	0.548426
HALLMARK_UV_RESPONSE_UP	1.12539e-09	0.514723
HALLMARK_WNT_BETA_CATENIN_SIGNALING	2.55409e-09	0.505108
HALLMARK_UV_RESPONSE_DN	2.88091e-09	0.503669
HALLMARK_COMPLEMENT	4.6376e-09	0.497917
HALLMARK_PEROXISOME	8.78748e-09	0.490023
HALLMARK_GLYCOLYSIS	1.35204e-08	0.484587
HALLMARK_XENOBIOTIC_METABOLISM	3.12584e-08	0.473733
HALLMARK_E2F_TARGETS	4.46255e-08	0.469006
HALLMARK_UNFOLDED_PROTEIN_RESPONSE	5.38147e-08	0.466491
HALLMARK_ANGIOGENESIS	4.5556e-07	0.436271
HALLMARK_SPERMATOGENESIS	1.01741e-06	0.424101
HALLMARK_APICAL_JUNCTION	6.79196e-06	0.393301
HALLMARK_G2M_CHECKPOINT	2.83418e-05	0.367904
HALLMARK_FATTY_ACID_METABOLISM	4.13543e-05	0.360817
HALLMARK_REACTIVE_OXYGEN_SPECIES_PATHWAY	0.000154011	0.334756
HALLMARK_PANCREAS_BETA_CELLS	0.000405124	0.313997
HALLMARK_EPITHELIAL_MESENCHYMAL_TRANSITION	0.000905164	0.295521
HALLMARK_INFLAMMATORY_RESPONSE	0.00158531	0.281881
HALLMARK_INTERFERON_GAMMA_RESPONSE	0.00172547	0.279759
HALLMARK_MYC_TARGETS_V2	0.00433096	0.255569
HALLMARK_ESTROGEN_RESPONSE_LATE	0.00663172	0.243574
HALLMARK_HEME_METABOLISM	0.00774586	0.239059
HALLMARK_BILE_ACID_METABOLISM	0.00935123	0.233474
HALLMARK_ANDROGEN_RESPONSE	0.00985352	0.231901
HALLMARK_MITOTIC_SPINDLE	0.0102566	0.230688
HALLMARK_TGF_BETA_SIGNALING	0.0180375	0.212954
HALLMARK_ALLOGRAFT_REJECTION	0.0642506	0.167378
HALLMARK_PI3K_AKT_MTOR_SIGNALING	0.0738581	0.161761
HALLMARK_APOPTOSIS	0.165209	0.125917
HALLMARK_DNA_REPAIR	0.185137	0.120274
HALLMARK_ADIPOGENESIS	0.196366	0.117289
HALLMARK_ESTROGEN_RESPONSE_EARLY	0.217687	0.111942
HALLMARK_HEDGEHOG_SIGNALING	0.25153	0.104171
HALLMARK_IL6_JAK_STAT3_SIGNALING	0.351647	0.0846952
HALLMARK_HYPOXIA	0.429149	0.0719325
HALLMARK_INTERFERON_ALPHA_RESPONSE	0.620834	0.04504
HALLMARK_IL2_STAT5_SIGNALING	0.712229	-0.033593
HALLMARK_APICAL_SURFACE	0.659055	-0.0401775
HALLMARK_COAGULATION	0.422212	-0.073016
HALLMARK_MYOGENESIS	0.0384183	-0.186938
HALLMARK_NOTCH_SIGNALING	0.0242442	-0.203119
HALLMARK_CHOLESTEROL_HOMEOSTASIS	0.00637072	-0.244728
HALLMARK_KRAS_SIGNALING_DN	0.00165255	-0.280843
HALLMARK_KRAS_SIGNALING_UP	0.000473441	-0.310508
HALLMARK_P53_PATHWAY	0.000342168	-0.317731
HALLMARK_TNFA_SIGNALING_VIA_NFKB	1.67343e-09	-0.510106

## Sheet: Table S5E
Table S5E : Upregulated pathway by ssGSEA scores and CLTA protein expression level (Student's t-test, p-value<0.05)between IDC and MBC
CLTA protein expression level (Student's t-test, p-value<0.05)between IDC and MBC
	Fold change (MBC/IDC)	p-value
CLTA	2.51339	2.47741e-05
Upregulated pathway by ssGSEA scores and CLTA correlated pathway between IDC and MBC
Upregulated pathway in MBC stage	p-value	Pearson_pValue	Pearson_corr
HALLMARK_ALLOGRAFT_REJECTION	0.0156316	0.0286067	0.197432
HALLMARK_ANGIOGENESIS	0.000161865	7.58189e-09	0.491864
HALLMARK_APICAL_JUNCTION	0.0442234	0.000142231	0.3364
HALLMARK_APOPTOSIS	0.00779678	0.0848724	0.156006
HALLMARK_BILE_ACID_METABOLISM	0.0394841	0.0272801	0.199078
HALLMARK_COMPLEMENT	0.0207729	2.90797e-09	0.503558
HALLMARK_DNA_REPAIR	0.0154074	0.125035	0.139061
HALLMARK_FATTY_ACID_METABOLISM	0.00666689	0.000213996	0.327861
HALLMARK_HEDGEHOG_SIGNALING	0.00038138	0.868742	0.0150535
HALLMARK_HEME_METABOLISM	0.000151927	0.0256138	0.201245
HALLMARK_IL6_JAK_STAT3_SIGNALING	2.30831e-06	0.914965	-0.00972701
HALLMARK_INTERFERON_ALPHA_RESPONSE	0.00118268	0.42305	0.0728844
HALLMARK_INTERFERON_GAMMA_RESPONSE	0.00438791	0.000103132	0.34295
HALLMARK_MTORC1_SIGNALING	0.0423392	5.2935e-10	0.523315
HALLMARK_MYOGENESIS	0.0334173	0.226345	-0.109878
HALLMARK_NOTCH_SIGNALING	0.00460736	0.00998301	-0.231507
HALLMARK_OXIDATIVE_PHOSPHORYLATION	0.00237384	4.65733e-12	0.572327
HALLMARK_PEROXISOME	0.00838515	7.33104e-10	0.519635
HALLMARK_PROTEIN_SECRETION	0.0202476	3.74605e-13	0.595476
HALLMARK_SPERMATOGENESIS	0.0237985	5.48519e-05	0.355407
HALLMARK_UNFOLDED_PROTEIN_RESPONSE	0.0426613	1.38253e-09	0.512337
HALLMARK_UV_RESPONSE_DN	0.000210369	3.67621e-08	0.471589
HALLMARK_WNT_BETA_CATENIN_SIGNALING	1.84814e-05	5.31103e-11	0.548115
HALLMARK_XENOBIOTIC_METABOLISM	0.0222955	9.60113e-07	0.424995

## Sheet: Table S5F
Table S5F : Cibersort scores correlated with PSMD6 between IDC and MBC
	Pearson_pValue	Pearson_corr	Student's t-test(pvalue)
Dendritic cells resting	0.0252791	0.214252	0.0753486
Neutrophils	0.0321359	0.205409	0.00160455
B cells memory	0.132494	0.144999	0.146974
Plasma cells	0.173842	0.13121	0.0270968
T cells CD4 memory resting	0.212109	0.120469	0.0616265
T cells follicular helper	0.277584	0.10492	0.616115
Macrophages M1	0.278649	0.104688	0.232015
Dendritic cells activated	0.637986	0.0455693	0.490159
T cells regulatory (Tregs)	0.73204	0.0331706	0.196275
T cells CD8	0.77794	0.0273211	0.82558
NK cells activated	0.892635	0.0130781	0.611635
T cells CD4 memory activated	0.886668	-0.0138097	0.57585
Mast cells activated	0.681089	-0.0398079	0.356767
Mast cells resting	0.664041	-0.0420689	0.472259
B cells naive	0.659815	-0.0426329	0.132265
Macrophages M0	0.582607	-0.0532165	0.65886
Macrophages M2	0.394808	-0.0823149	0.693685
T cells CD4 naive	0.393269	-0.0825823	0.073715
NK cells resting	0.380027	-0.0849094	0.872731
Eosinophils	0.309977	-0.0981418	0.187909
T cells gamma delta	0.0866184	-0.1649	0.305014
Monocytes	0.000360822	-0.335581	2.1615e-06

## Sheet: Table S5G
Table S5G List of the PSMD6 correlated pathway panel (Spearman's correlation, p-value <0.05, rho >0.2) between IDC and MBC stages
	Pearson_pValue	Pearson_corr	Student's t-test pvalue
HALLMARK_APICAL_SURFACE	0.000971038	0.317363	0.00618904
HALLMARK_DNA_REPAIR	0.0243129	0.219724	0.279924
HALLMARK_ANGIOGENESIS	0.0489866	0.192629	0.000161865
HALLMARK_WNT_BETA_CATENIN_SIGNALING	0.101793	0.160563	7.13907e-08
HALLMARK_IL6_JAK_STAT3_SIGNALING	0.141294	0.144529	0.001332
HALLMARK_TGF_BETA_SIGNALING	0.179406	0.132029	0.60945
HALLMARK_IL2_STAT5_SIGNALING	0.304431	0.101177	0.047136
HALLMARK_APOPTOSIS	0.313143	0.0993799	0.00329435
HALLMARK_PI3K_AKT_MTOR_SIGNALING	0.388962	0.0849387	0.602789
HALLMARK_KRAS_SIGNALING_DN	0.396915	0.0835281	0.440953
HALLMARK_PROTEIN_SECRETION	0.465582	0.0719792	0.153507
HALLMARK_CHOLESTEROL_HOMEOSTASIS	0.592881	0.0527734	3.72499e-06
HALLMARK_INTERFERON_ALPHA_RESPONSE	0.593592	0.0526721	0.0767528
HALLMARK_UV_RESPONSE_DN	0.705431	0.0373229	0.0131387
HALLMARK_MTORC1_SIGNALING	0.756104	0.0306716	0.0392589
HALLMARK_MYC_TARGETS_V1	0.78382	0.0270927	0.00152779
HALLMARK_COAGULATION	0.86007	0.0174107	0.371829
HALLMARK_APICAL_JUNCTION	0.871274	0.0160041	0.0892208
HALLMARK_P53_PATHWAY	0.841356	-0.0197683	0.0752527
HALLMARK_MYOGENESIS	0.830388	-0.021155	0.903355
HALLMARK_GLYCOLYSIS	0.773053	-0.0284785	0.0187298
HALLMARK_COMPLEMENT	0.747708	-0.0317634	0.116541
HALLMARK_INTERFERON_GAMMA_RESPONSE	0.69796	-0.0383171	0.716779
HALLMARK_HYPOXIA	0.693409	-0.0389246	0.279631
HALLMARK_ALLOGRAFT_REJECTION	0.689184	-0.0394899	0.0383399
HALLMARK_PANCREAS_BETA_CELLS	0.626058	-0.0481022	0.726862
HALLMARK_INFLAMMATORY_RESPONSE	0.58567	-0.0538039	0.174696
HALLMARK_HEDGEHOG_SIGNALING	0.51551	-0.0641636	0.949271
HALLMARK_EPITHELIAL_MESENCHYMAL_TRANSITION	0.482505	-0.0692824	0.695959
HALLMARK_REACTIVE_OXYGEN_SPECIES_PATHWAY	0.447407	-0.0749363	0.100998
HALLMARK_ESTROGEN_RESPONSE_EARLY	0.429056	-0.0779909	0.000583344
HALLMARK_ADIPOGENESIS	0.296552	-0.10283	0.0123646
HALLMARK_TNFA_SIGNALING_VIA_NFKB	0.244609	-0.114547	0.124164
HALLMARK_ESTROGEN_RESPONSE_LATE	0.205405	-0.124588	0.00800769
HALLMARK_HEME_METABOLISM	0.199566	-0.126197	0.0147923
HALLMARK_XENOBIOTIC_METABOLISM	0.190353	-0.128806	0.0480159
HALLMARK_UNFOLDED_PROTEIN_RESPONSE	0.190129	-0.128871	0.0350225
HALLMARK_NOTCH_SIGNALING	0.118702	-0.153198	0.244213
HALLMARK_OXIDATIVE_PHOSPHORYLATION	0.115101	-0.154695	0.0076639
HALLMARK_E2F_TARGETS	0.0875762	-0.16754	0.00422804
HALLMARK_ANDROGEN_RESPONSE	0.0595312	-0.18451	0.242461
HALLMARK_MYC_TARGETS_V2	0.0554959	-0.187466	0.00951895
HALLMARK_KRAS_SIGNALING_UP	0.0525089	-0.189769	0.0476285
HALLMARK_BILE_ACID_METABOLISM	0.0486371	-0.192922	0.00383852
HALLMARK_G2M_CHECKPOINT	0.0356807	-0.205261	7.46938e-05
HALLMARK_SPERMATOGENESIS	0.0130076	-0.24166	2.73482e-06
HALLMARK_PEROXISOME	0.00679094	-0.262658	3.06606e-05
HALLMARK_FATTY_ACID_METABOLISM	0.00596407	-0.266663	1.91552e-10
HALLMARK_UV_RESPONSE_UP	0.00444966	-0.275489	4.93085e-06
HALLMARK_MITOTIC_SPINDLE	0.00025803	-0.349479	3.67199e-08
