# Supplementary material for: Proteome profiling of serum reveals PSMD6 as a biomarker in breast cancer metastasis
Source: Research Square preprint supplement (doi:10.21203/rs.3.rs-3634466/v1), 2023-12-11
Supplement: Supplementary file 3 [file 421abaa036652bafd92db5fa.xlsx]

## Sheet: Description
Table S3	Differentially expressed proteins between BBT and BC. Related to Figure 3
Sheet	Description
Table S3A	List of differentially proteins (Kruskal-Wallis test p-value <0.05, ratio >1.5 or <0.666666) between Fibroma, Papiiloma, BC and HC serum samples
Table S3B	List of significantly enriched terms in the functional enrichment analysis on DEPs
Table S3C	List of candidate proteins of classifier model in serum samples

## Sheet: Table S3A
Table S3A : List of differentially proteins (Kruskal-Wallis test p-value <0.05, ratio >1.5 or <0.666666) between Fibroma, Papiiloma, BC and HC serum samples
	p.value	HC	Fibro	Papillo	BC
AOC1	5.86e-14	0.659172	0.180421	0.295773	1.46876
NIT2	4.72e-16	0.155677	0.236506	0.169089	1.48325
ALDH3B1	0.00063658	0.610653	0.474492	0.0265642	0.955233
ARL8A	1.02e-08	0.78779	0.9913	0.755652	1.86971
SELL	1.38e-06	6.59363	4.76562	4.35988	12.6735
MGAM	1.64e-05	0.0548256	0.0179316	0.0315609	0.566279
PSMD6	2.56e-05	0.155681	0.201737	0.123692	0.669231
NAPRT	5.52e-13	0.0614139	0.18165	0.0546604	0.994003
RAP1A	9.6e-24	0.0977415	0.116836	0.00959899	1.33776
CD93	0.00133944	0.200903	0.137137	0.0881939	0.81854
TCIRG1	0.00158768	0.0517366	0.0142697	0.0459698	0.250806
ACAA1	4.51e-26	0.0887009	0.137819	0.206502	1.52082
ITGAL	0.00348397	0.0617957	0.0518203	0.115475	0.58323
LTA4H	0.00798801	0.543063	0.674304	0.683079	2.64202
PRCP	2.38e-05	2.58312	3.63371	3.82847	6.23297
FUCA2	0.00411373	0.0273668	0.0667839	0.0152589	0.382371
PA2G4	9.49e-42	0.159842	0.470375	1.76012	2.19387
CCT8	6.01e-37	2.05028	0.213198	0.0940409	1.92373
RHOA	2.28e-23	0.048935	0.06411	2.4018	1.25787
DERA	0.00592263	0.17954	0.468686	1.37043	0.394805
A1BG	0.00107396	135.897	145.18	142.009	151.446
A2ML1	1.58e-15	3.80892	2.72145	1.8695	2.01924
AAAS	0.0191624	0.0026089	0.0120788	1e-05	0.0828823
AAGAB	0.0298826	0.0805161	1e-05	0.0043355	0.009617
AAK1	2.44e-24	0.055953	0.526149	0.638817	0.667226
AARS1	8.04e-10	1.84126	1.82295	0.0763425	1.75308
ABCA6	1.09e-39	0.0489878	2.10771	0.292927	0.200008
ABCA9	0.00248481	1e-05	1e-05	0.000923941	1e-05
ABCB1	0.00580293	0.00743277	0.0186759	0.0185768	0.211717
ABCB8	0.0322719	0.00444061	0.00402294	0.0258672	0.00501747
ABCC2	5.85e-07	0.340174	1.93189	1.94755	1.3474
ABCD3	2.59e-05	2.07693	2.47214	2.15527	1.70637
ABCE1	5.99e-06	2.14658	2.67441	3.32777	1.77184
ABCF3	1.57e-34	2.01788	0.353949	0.182454	0.118522
ABHD10	2.63e-33	0.168562	2.19918	1.97912	0.574292
ABHD11	7.29e-05	1.14602	2.06068	1.85227	1.99993
ABHD12	0.0441708	0.0678593	0.00908488	0.00620316	0.0604914
ABHD14B	4.09e-33	1.64192	1.66868	2.61574	3.73291
ABHD16A	5.63e-24	0.348088	2.28789	0.723131	1.46203
ABLIM1	0.00239067	0.0076043	0.0427223	0.0355559	0.0686663
ABR	2.43e-05	1.71143	1.71443	0.281152	0.98074
ACACA	0.0223589	0.33592	0.301464	0.303623	0.326807
ACAD10	6.86e-61	1.93703	0.00584347	1e-05	0.00858951
ACAD8	9.35e-39	2.19132	0.122078	0.227974	0.111077
ACADVL	3.46e-14	1.80907	2.11924	0.202022	1.1172
ACAN	4.89e-36	2.74976	2.79835	2.03037	0.475491
ACIN1	8.87e-08	1.08085	1.53216	1.21572	1.65444
ACLY	4.64e-08	3.53385	0.904177	2.05305	1.02799
ACO1	5.92e-32	1.85856	0.0569163	1.58598	1.78848
ACOT1	6.59e-20	0.307957	0.11956	2.59303	0.0352874
ACOT2	1.04e-14	0.254781	0.101898	2.3318	0.209678
ACOX1	0.00796984	1.96292	2.47531	2.08613	2.18511
ACOX3	5.36e-06	0.53341	1.74307	0.463501	0.914124
ACP1	0.00017661	2.35086	2.15806	1.85885	1.52409
ACR	0.00086937	0.111229	0.132966	0.0909197	0.0856053
ACSL1	1.8e-19	0.498258	0.290818	2.17786	1.34039
ACSM2B	1.19e-24	0.0183506	1.96263	1.61845	1.70261
ACTR3C	3.49e-14	0.157318	1.64677	1.63722	0.552686
ACTN2	4.95e-23	1.53637	0.05316	0.00728676	1.09378
ACTN3	1.45e-22	1.57321	0.0303014	0.00717302	1.14742
ACTR1A	0.00151687	0.689312	0.911476	0.694276	0.932956
ACTR2	1.79e-08	2.8111	2.97433	5.21763	5.48733
ACTR3	5.74e-07	0.313866	2.09799	0.407566	1.67143
ACTR3B	1.18e-11	0.0937992	1.48107	1.36387	0.284375
ACTR5	0.028382	0.0359237	0.0333724	1e-05	1e-05
ADA2	5.9e-05	1.69542	2.10762	2.06639	1.36236
ADAMTS13	0.0297544	0.855311	1.15906	0.44973	0.707299
ADAMTSL4	1.52e-09	0.00359249	0.00329408	0.00331034	0.877182
ADAR	0.00014313	2.32638	1.5533	2.20171	1.59525
ADD1	2.55e-08	0.491351	2.37375	2.22237	1.76243
ADD2	7.76e-12	2.02401	2.1579	0.0736974	1.60484
ADD3	7.3e-06	1.13041	1.80986	0.626829	1.83721
ADGRL2	0.00081971	0.23811	0.200269	0.262382	0.44384
ADH1A	4.8e-17	2.03824	3.29242	2.80735	1.21644
ADH1B	1.18e-05	1.77036	5.11976	7.21465	3.46581
ADH1C	5.03e-25	1.17366	5.0633	5.88028	1.78167
ADH5	7.4e-05	1.51362	1.9626	1.59705	2.22762
ADI1	0.0003513	0.737893	1.71494	0.947773	1.97017
ADNP	0.00079127	0.027295	0.0331116	0.0701679	0.0204454
ADPGK	3.39e-06	1.00213	2.19473	0.92881	1.78001
ADPRH	5.2e-19	0.0989917	0.397327	2.18355	0.177117
ADSL	0.0283038	20.7802	18.2442	16.057	13.1419
AFDN	1.23e-05	0.445562	0.463799	0.98881	1.24357
AFG3L2	2.78e-26	0.0529952	1.55245	0.0226332	1.11547
AFM	6.79e-06	41.361	52.5443	53.3125	55.9745
AGK	7.22e-32	2.37056	0.22809	0.204878	0.328933
AGL	0.00012982	1.65962	1.96597	0.392312	1.7595
AGO1	1.58e-29	0.0209447	2.12352	0.327333	0.762355
AGO2	1.54e-06	1.11851	2.17507	1.49257	2.17414
AGO3	1.17e-14	0.283912	0.32112	1.93162	1.36114
AGPAT5	0.00136991	0.676293	0.0158959	0.492856	0.0894825
AGPS	1.37e-43	0.326691	2.07925	0.0275327	0.0786088
AGR2	0.0437587	4.12315	3.59167	3.69249	2.44029
AGRN	0.0307846	0.145509	0.172129	0.103356	0.550068
AHCY	0.020754	1.08269	1.18371	1.32266	1.62005
AHNAK2	6.09e-23	1.93597	0.0697425	0.0610602	0.608646
AHR	1.89e-06	2.4161	3.09441	3.30361	3.17897
AHSG	0.0282344	365.176	281.462	272.985	302.258
AIFM1	1.14e-23	0.196307	2.32751	1.91374	1.14161
AIP	6.96e-12	1.24065	2.24101	0.0656161	2.01093
AK1	6.95e-39	2.15845	2.28643	0.251596	0.371276
AK2	4.23e-06	2.81083	2.86024	1.51904	2.74308
AKAP1	0.0159765	0.103843	0.635616	0.175704	0.404375
AKAP12	6.94e-44	0.439554	2.50397	0.0475598	0.341235
AKAP9	1.18e-08	0.108777	0.0504537	0.0440035	0.0640532
AKR1A1	1.01e-05	0.505724	1.14499	1.11552	1.06962
AKR1B1	0.0213212	23.8708	20.3508	18.2853	22.2306
AKR1B10	4.3e-39	0.785104	0.335752	1.00092	2.24397
AKR1B15	3.6e-29	0.850992	0.329183	0.876835	2.01724
AKR1C1	0.0318197	0.0319472	0.0390863	1e-05	0.0196853
AKR1C3	0.00112472	0.821014	0.655314	0.602126	0.567886
AKR1C4	3.74e-38	1.88549	0.0536297	0.0393053	0.0320806
AKR7A2	0.0135802	8.24073	5.2735	3.39212	5.90727
AKR7A3	2.63e-11	4.78753	5.66254	2.94753	3.33707
AKR7L	1.69e-12	4.76655	5.64624	2.90522	2.22818
ALAD	6.67e-34	2.23258	0.308133	0.120488	0.263083
ALDH1B1	0.0223715	2.74268	2.4107	2.97985	2.00077
ALDH1L1	5.77e-16	0.439862	1.78368	0.348065	0.361549
ALDH3A1	2.78e-21	0.654814	2.46609	0.212384	2.33021
ALDH3A2	1.42e-11	2.36805	2.51352	0.0514722	2.02533
ALDH3B2	0.00198178	0.791517	0.616837	0.0345307	1.10212
ALDH4A1	7.12e-14	0.168413	0.290968	1.61222	0.709803
ALDH6A1	1.22e-32	0.400967	2.60478	0.637293	2.22327
ALDH7A1	0.0103206	0.106971	0.600559	0.697698	1.14617
ALDH8A1	0.00041172	0.0231842	0.010106	0.124133	0.0202025
ALDOB	0.0161885	1.27555	1.27616	1.42663	1.49954
ALDOC	1.64e-05	1.46811	2.65639	1.72865	3.1833
ALG1	0.0253972	0.235566	0.502987	1e-05	0.253885
ALG11	5.5e-10	0.213525	0.289416	0.240058	1.14504
ALG14	0.022966	0.0647474	0.398475	0.195764	0.344317
ALPP	5.22e-05	0.219894	0.00574346	0.00315391	0.00481762
ALOX5	1.72e-08	10.0638	16.6005	3.00303	13.901
AMY1A	0.0102122	1.45976	1.85668	2.32425	2.0387
AMY2B	0.00804582	1.50917	1.91702	2.39667	2.13883
ALPG	2.8e-05	0.219894	0.00509975	0.0110991	0.00481762
ALPL	0.0206637	0.486853	1.10119	0.301666	0.350116
ALYREF	6.7e-18	1.98379	0.443589	0.493206	1.78072
ANAPC2	5.11e-31	0.0235133	2.00881	0.0569502	0.573784
ANKHD1	1.43e-14	0.0252746	0.0343935	1.82336	0.322353
ANGPTL3	5.02e-23	1.79048	1.95032	0.13193	0.583839
ANK1	0.0109649	0.351754	0.35861	0.279134	0.41964
ANK2	5.48e-15	0.0125541	0.0475469	1.77268	0.0142163
ANKRD17	3.85e-23	0.0254924	1.95754	1.824	0.932148
ANKS4B	0.020587	0.549535	0.1663	1e-05	0.0664494
ANKZF1	0.0165629	1e-05	0.0343069	1e-05	1e-05
ANP32A	2.96e-15	1.82364	3.74775	5.47633	4.47662
ANP32B	6.05e-18	0.528848	0.985132	4.13539	1.87404
ANP32C	0.0235244	0.213009	0.881848	2.25341	1.52784
ANTXR1	2.04e-15	0.935092	2.5	2.35315	3.15061
ANTXR2	3.21e-08	0.198637	0.230857	0.225138	1.2864
ANXA1	1.92e-06	2.26996	1.1894	1.35768	1.08651
ANXA10	0.0016163	3.37271	4.67736	4.15525	3.98209
ANXA11	0.0397626	0.137463	0.0474435	0.0174465	0.0177525
ANXA13	0.00045809	0.105421	0.020673	0.00256707	0.0644738
ANXA2	0.00136253	0.588051	2.58711	2.76508	1.26092
ANXA3	1.43e-05	1.85164	2.48365	2.2121	1.76915
ANXA4	2.58e-05	1.96556	2.21635	2.58917	1.54533
AOC2	2.19e-41	0.0402869	2.08916	1.85808	0.239104
AP1B1	1.14e-33	1.86308	0.104953	0.0125179	0.0558378
AP1M2	7.45e-06	0.216914	0.0342842	0.0155848	0.0290892
AP2A1	0.0115953	1.47887	1.96771	2.1569	2.27854
AP2A2	0.020452	0.847835	1.00779	0.863439	1.1524
AP2B1	1.88e-06	0.585511	1.76888	1.57209	0.806851
AP2M1	9.78e-24	0.362009	2.5863	0.0455464	0.805863
AP2S1	1.76e-10	0.464471	0.728725	0.0969584	3.87309
AP3B1	7.66e-32	1.91557	0.0816809	0.0402757	0.19646
AP3D1	1.03e-28	0.0893508	2.1315	0.0309576	1.84084
AP3M2	0.0230186	0.0165814	1e-05	1e-05	1e-05
AP4E1	2.19e-27	0.0245641	0.101516	2.07556	0.0911004
APEH	0.0199738	1.34008	1.67477	2.94426	2.11477
APLP2	1.4e-06	0.160053	1.60809	1.84958	0.994971
APMAP	0.0377861	15.4979	18.4728	33.4423	13.2141
APOA1	0.0307844	7066.48	7086.58	6610.89	6680.03
APOA2	1.84e-09	2188.74	2598.95	2483.84	2759.41
APOA5	0.00402645	0.0221681	0.0247878	0.007682	0.00647116
APOB	0.0131988	93.8214	98.8434	100.133	104.826
APOBEC3G	1.39e-08	0.0231557	0.0618663	0.0243996	0.577568
APOC2	0.00030654	198.97	207.178	203.692	245.627
APOE	0.0436788	201.821	207.909	184.064	222.461
APOH	8.44e-07	50.7444	56.3819	58.2902	64.0146
APP	5.74e-23	1.88551	0.136024	0.0888602	1.05818
APRT	0.0102816	0.317741	0.659738	0.0974123	0.762403
AQP4	0.00995818	1e-05	1e-05	0.110236	0.0159932
AQR	1.16e-07	1.9296	0.9361	0.823852	1.03179
ARAF	3.42e-15	1.86018	0.202263	0.286151	0.91527
ARCN1	4.7e-06	3.81692	2.79614	2.55385	2.32351
ARF1	3.47e-06	4.79749	7.33896	3.24923	7.58279
ARF3	3.47e-06	4.79749	7.33896	3.24923	7.58279
ARF5	7.19e-20	0.271649	2.42655	2.4819	1.96132
ARFGAP2	4.23e-25	1.86709	0.108185	1.87424	1.02578
ARFGEF1	9.84e-06	0.177149	0.118156	0.083176	1.0649
ARFGEF2	1.32e-08	0.0634699	1.81332	1.63609	1.6484
ARFGEF3	1.16e-23	0.0855946	1.93135	0.603719	1.62999
ARG1	6.18e-18	1.11268	8.4648	7.06617	11.3292
ARHGAP1	6.38e-12	2.01844	2.3231	0.0741373	2.31882
ARHGAP25	2.64e-47	1.93593	2.17853	1.79557	0.131254
ARHGDIA	0.00292309	2.67824	10.4077	1.90629	2.2572
ARHGDIB	0.00253289	3.43256	3.89551	3.59664	3.66326
ARHGEF10	8.6e-27	0.0493111	1.79787	0.0466354	0.515953
ARHGEF10L	2.02e-32	0.0371105	1.68224	0.00697418	0.175118
ARHGEF37	6.45e-22	0.348373	2.4287	2.40482	2.28226
ARIH2	0.0360994	0.00577266	1e-05	0.00399102	1e-05
ARL15	2.13e-36	0.218944	3.82238	0.594195	1.06322
ARL2	0.00242133	7.60619	7.28664	8.05449	7.25475
ARL6IP5	4.18e-15	1.45691	3.27695	2.52214	2.74953
ARMC5	0.0113005	0.186975	0.0553318	0.0493984	0.0241605
ARMC6	0.0220196	0.219823	1.47586	0.732655	1.02018
ARMC8	0.00156015	0.00377919	0.313831	0.168277	0.22746
ARMCX1	3.08e-16	1.93834	2.03485	0.121167	1.16114
ARPC1A	0.00108421	1.79816	1.15465	1.20898	1.29689
ARPC1B	0.00112618	1.97587	1.26079	1.64867	1.48568
ARPC2	0.00356663	0.91984	0.612077	1.68462	0.833298
ARPC3	0.0114008	0.0726133	0.124572	0.108963	0.354121
ARPC5	8.46e-14	2.11223	4.33187	1.01489	4.62828
ARPC5L	0.0466471	0.102058	0.926925	0.380563	0.340779
ARRB1	5.84e-16	0.0961789	0.0815159	1.89559	0.281178
ARSA	1.34e-44	0.128459	2.26284	0.0633938	0.236248
ARSD	1.27e-23	0.500461	2.49216	0.559329	2.47237
ARSH	2.42e-20	0.0495219	0.322293	0.161826	1.37819
ARSL	4.36e-17	0.079764	0.369607	0.194217	1.34828
ART3	0.0120863	2.48089	3.42805	3.05372	2.85761
ASAH1	0.019263	1.89926	1.75657	1.1314	1.36526
ASAP2	1.44e-42	1.79495	2.08482	0.0199175	0.23091
ASCC1	2.46e-24	0.0909665	0.157629	1.82803	1.25884
ASH2L	0.0353673	0.0514219	0.210089	0.0971809	0.233708
ASNS	6.65e-18	0.147093	0.214819	2.22244	0.262
ASPH	1.78e-22	0.337965	2.64373	2.09235	2.51458
ASS1	6.43e-05	0.987414	1.27052	2.32816	1.67575
ATAD1	8.77e-33	2.42244	0.330402	0.366409	0.275852
ATAD3A	1.4e-14	0.0248516	0.0347556	1.82927	0.199081
ATE1	4.59e-06	3.24417	2.41646	1.54267	4.43641
ATG9A	2.21e-16	2.64359	0.682758	2.69115	1.63341
ATIC	0.00239087	0.301495	0.305758	1.82379	1.02185
ATL3	4.39e-21	2.04587	1.91959	0.811332	0.683979
ATP12A	2.26e-50	1.79026	0.00165749	0.00475211	0.0086235
ATP13A1	2.11e-14	0.41353	1.9629	0.00673003	1.60101
ATP1A1	3.51e-07	0.375532	0.579291	0.906841	0.49275
ATP1A2	8.99e-41	1.47283	0.0191158	0.00561773	1.6648
ATP1A3	6.35e-12	0.0873139	2.04425	1.42078	1.61606
ATP1A4	7.33e-31	1.56258	0.0140166	0.0108007	0.24176
ATP2A1	8.81e-07	1.60818	1.7482	1.65181	0.499256
ATP2A3	5.12e-10	0.0318606	0.0452876	0.0308773	0.908202
ATP2B2	0.00169601	0.0512854	0.00659354	1e-05	0.00775074
ATP2B4	2.32e-14	0.0427849	0.0705681	0.00813723	1.03308
ATP4A	0.0194741	0.0108766	0.000436286	1e-05	0.00411685
ATP5F1D	0.00042758	3.26854	5.5575	4.57209	5.14398
ATP5MG	1.12e-19	0.248673	0.403068	2.31617	0.275171
ATP5PF	6.3e-26	1.41649	17.1155	20.295	18.3282
ATP5PO	0.00122115	5.77035	13.6113	8.86264	13.2259
ATP6AP1	1.14e-09	0.510688	0.369831	0.101568	0.936285
ATP6V1A	6.96e-08	1.65573	2.10231	2.62708	2.54111
ATP6V1C1	1.15e-19	0.0739928	1.61552	5.73687	1.31661
ATP6V1F	5.14e-12	2.16262	0.742605	3.0385	1.29032
ATP6V1H	7.4e-36	0.0132195	2.05672	0.0944908	0.4698
ATPAF1	8.13e-37	4.47545	2.60568	5.21792	1.53108
ATXN10	0.00176347	3.37205	2.83694	3.07955	3.18379
ATXN3	0.0360994	0.0280861	1e-05	0.0119819	1e-05
AVIL	1.11e-22	1.87802	0.00964857	0.00450992	0.861067
AVL9	0.0029895	0.0970315	1e-05	1e-05	0.00478604
B4GAT1	7.93e-23	0.18184	2.17502	2.26029	2.07775
BABAM2	0.0232601	0.00431588	0.0985308	0.27416	0.569749
BAG6	1.11e-17	0.028301	0.101511	1.75689	0.0889274
BANF1	0.0176733	1.69211	0.524002	1.25278	0.385263
BAZ2A	8.59e-06	0.000672439	1e-05	0.00548766	0.000644731
BCAM	2.88e-43	0.119472	2.38245	2.15685	0.464269
BCAN	4.14e-46	2.03905	2.25392	0.168267	0.196221
BCAP31	5.44e-06	5.92154	4.96434	4.11183	4.31066
BCAR1	1.35e-11	0.0498085	0.047083	0.0631355	0.7425
BCAT2	1.79e-26	0.259972	2.34396	1.25108	2.15933
BCKDHB	1.91e-09	2.48	2.38537	0.539224	2.5063
BCL2L1	0.0140851	0.418616	0.0287615	1e-05	0.0238529
BCL2L13	1.51e-05	0.33456	0.140819	1.57359	0.981426
BGN	0.00121611	4.48294	7.47438	7.2197	7.42945
BHMT	1.01e-11	2.17082	2.48725	0.383393	1.45878
BICDL2	0.00683397	0.587074	0.734377	0.0617049	0.416465
BID	0.00929258	0.450088	0.139556	0.0215201	0.194708
BIN3	0.0240776	3.11771	3.48855	2.73808	3.42551
BIRC6	0.00578864	0.00411309	0.00246854	0.00220096	0.00124709
BLOC1S2	0.0442321	1e-05	0.00127567	0.0173333	0.00484468
BLOC1S4	1.74e-46	2.05918	2.42123	0.34042	0.295786
BLVRA	1.34e-14	3.34454	1.27452	0.768599	1.51789
BOD1	0.00248481	1e-05	1e-05	0.0648892	1e-05
BORCS8	8.22e-25	0.427088	8.49109	8.01276	7.4915
BPGM	0.0344433	2.00195	0.927377	1.82228	1.47599
BPNT1	0.0015998	0.163179	0.0179733	0.0119884	0.0308915
BRAF	1.61e-13	0.130083	0.189086	0.257763	0.93493
BRD9	0.0230186	0.00498319	1e-05	1e-05	1e-05
BRIX1	8.68e-35	2.35617	0.395399	0.346238	0.295991
BSG	0.0163324	4.03779	3.22641	3.23591	2.05881
BSN	1.23e-26	1.8899	0.0140344	0.0329433	0.546464
BST1	7.35e-29	1.93356	0.0405836	1.41845	0.529097
BTAF1	9.34e-07	0.0849146	0.104149	0.0268585	0.646109
BTBD1	0.00248481	1e-05	1e-05	0.00116895	1e-05
BTD	0.0046328	39.287	33.045	34.5706	35.6589
C12orf10	6.76e-27	1.94289	2.18122	1.86505	0.630947
BZW2	5.21e-34	0.0910792	2.07112	1.62935	0.428272
C11orf54	1.1e-20	1.97842	0.892488	0.0735574	1.14371
C11orf96	0.00265986	1e-05	0.018645	1e-05	0.00187042
C15orf48	0.00248481	1e-05	1e-05	0.224079	1e-05
C16orf54	0.00248481	1e-05	1e-05	0.0153829	1e-05
C17orf75	0.00506759	0.00399307	0.0108844	0.0691324	1e-05
C1orf116	0.00387411	1e-05	1e-05	0.0198192	0.00996123
C1orf198	0.02506	0.0157284	0.0923505	0.0332393	0.021034
C1orf56	1.27e-39	0.0640939	2.06452	1.65499	0.22914
C1orf87	0.0230186	0.0435773	1e-05	1e-05	1e-05
C1S	0.0245814	39.2844	38.2885	36.2495	40.0279
C2	0.0104802	15.1504	24.4535	22.2486	23.9991
C2CD5	3.21e-06	2.02407	1.91608	2.06406	1.23743
C3	0.00135885	759.793	793.23	781.048	839.704
C4BPA	0.00984926	56.1998	55.2561	54.6227	60.5261
C4BPB	0.023559	1.794	2.00345	1.7984	2.16927
C5	0.0014331	32.6622	29.3116	28.7475	31.5144
C6orf58	0.00361903	0.0294693	0.00161046	1e-05	0.00683129
C8B	8.84e-06	29.9498	25.481	25.6446	25.6996
C9	0.00088355	35.7962	38.6523	38.6452	42.9084
C9orf64	9.35e-10	2.72015	2.63836	0.182112	1.67392
CA12	2.36e-18	0.0959184	0.368104	2.37888	0.912257
CA3	9.11e-29	1.6749	0.153777	1.61116	3.04087
CACNA2D1	0.00185531	0.567944	0.370767	0.428461	0.424582
CACNA2D2	0.0153017	0.315629	0.264349	0.284287	0.305009
CAD	7.05e-07	1.56737	0.190348	0.194116	1.32388
CADM1	0.0215284	2.15972	2.54047	2.5988	2.51829
CADM4	0.00014469	5.2013	8.22475	8.28596	9.77716
CALD1	7.39e-11	3.73213	2.19695	2.07616	1.21614
CALHM5	0.0030962	4.62442	5.17811	9.01354	4.46371
CALML5	3.03e-10	1.6555	4.0419	2.84662	4.16029
CALU	4.17e-07	2.10705	2.17815	0.505899	1.83188
CAMK1	2.33e-22	1.85045	0.205787	0.324314	0.717431
CAMK1D	2.52e-08	0.839494	1.20265	0.446575	2.07871
CAMK2A	0.00336047	0.000719566	0.0446395	0.0898947	0.231904
CAMK2B	0.00688032	0.000561806	0.00121527	1e-05	0.189213
CAMK2D	0.00598127	2.06058	2.03989	1.93095	1.85132
CAMK2G	0.0345238	0.0233074	0.080525	0.0210478	0.217078
CAMKK2	0.0349624	0.223927	0.0349813	1e-05	0.0530071
CAMP	4.99e-05	0.620535	0.443953	0.462862	0.4758
CAND2	4.16e-08	1.69685	2.02247	1.56181	1.14101
CANX	0.00377814	6.10189	4.08125	2.12045	4.69373
CAPN2	9.98e-09	2.92533	1.93625	0.640721	1.66066
CAPN5	0.0254769	8.98757	13.6268	8.73376	11.3751
CAPRIN1	1.56e-18	0.335086	2.28718	2.47007	2.66698
CAPZA1	0.00011792	1.83847	1.01717	1.25437	1.40165
CAPZA2	0.00061315	3.02204	3.15815	2.93767	3.01525
CAPZB	2.06e-09	0.290818	1.97179	1.86738	1.45497
CARD9	1.23e-14	1.82418	1.98936	0.555659	0.826337
CASP1	2.68e-16	1.39629	1.19065	2.23324	2.2691
CASP14	2.97e-09	1.90164	2.42614	2.73083	1.36705
CASP2	2.05e-07	0.133656	0.118017	0.177283	0.691535
CASP3	0.00051129	0.180603	0.202477	0.0304797	0.20219
CASP4	0.0346812	0.0278165	0.0145736	0.0278953	0.554613
CASP8	2.82e-21	0.463277	2.5509	2.98558	2.05849
CAST	2.31e-32	0.0463199	1.90666	0.0883492	1.7329
CASTOR2	0.0256817	0.045929	0.123562	0.133388	0.194955
CAVIN1	2.01e-18	2.00983	0.353087	0.468353	0.815248
CBFB	0.0172203	1e-05	0.04773	1e-05	0.104703
CBR1	6.1e-20	0.389608	1.17178	4.45134	2.1737
CBR3	2.26e-27	4.78918	0.217825	0.12523	1.12017
CBWD1	0.034466	0.0177614	0.013903	1e-05	1e-05
CBWD2	0.034466	0.0169896	0.013299	1e-05	1e-05
CBWD3	0.034466	0.0169896	0.013299	1e-05	1e-05
CBWD5	0.034466	0.0169896	0.013299	1e-05	1e-05
CC2D1A	1.36e-35	1.82745	0.0635009	0.090884	0.0688495
CCAR1	2.77e-25	0.298397	2.07669	1.96941	0.718982
CCAR2	6.71e-18	0.101998	0.0677569	1.84479	0.0958583
CCDC126	0.00029602	0.48692	0.402861	1.73327	1.0058
CCDC22	2.7e-29	0.067816	0.27052	1.57841	0.89301
CCDC50	1.04e-22	2.41856	0.337054	0.484759	0.887591
CCDC6	1.03e-21	1.56977	0.0631467	0.39555	0.955644
CCL18	0.0208105	0.218686	0.0889782	0.0377467	0.0712546
CCDC90B	2.5e-28	0.043442	0.0446026	0.0395803	1.50422
CCL21	0.0360994	0.170136	1e-05	0.00369482	1e-05
CCNK	3.95e-17	2.90242	0.542225	0.866402	0.426373
CCT2	1.13e-08	0.979828	2.60092	2.21848	2.05862
CCT4	1.95e-06	0.666782	1.8195	0.283301	1.678
CCT5	4.35e-07	3.89957	3.59702	2.07972	2.87088
CCT7	8.91e-19	0.187467	2.05434	1.49285	0.580979
CD109	0.00317272	2.84645	2.3783	3.5177	2.49233
CD14	0.00062517	28.0325	21.1788	5.47078	15.5142
CD163	0.00410965	0.728382	0.52804	0.572972	0.661454
CD2AP	5.85e-26	0.132492	2.86738	0.664457	2.40328
CD40	0.0360994	0.00656992	1e-05	0.0109193	1e-05
CD44	0.0302187	1.08115	1.37446	1.47483	1.17298
CD59	0.0475669	0.127532	0.0159167	1e-05	0.0339809
CD74	7.22e-15	10.0298	4.79422	3.12167	5.55256
CD82	0.0475196	0.00517042	0.0976214	0.0268531	0.112294
CDC123	1.05e-44	1.8142	0.0331883	1e-05	0.0484335
CDC26	0.0353394	0.291896	0.0153691	1e-05	0.0380088
CDC37	3.81e-18	1.54485	8.04787	7.59486	5.91951
CDC42	1.28e-10	0.693465	0.908082	1.35889	2.5678
CDC42BPA	3e-27	2.90879	0.731863	0.531847	2.85291
CDC42BPB	0.00043154	0.0360823	0.0195889	0.01545	0.509329
CDC42EP1	9.63e-18	0.0161503	0.242236	1.84409	0.682706
CDCP1	0.00051169	0.0997201	0.0102749	0.0533842	0.029325
CDH1	7.29e-06	0.551538	1.94643	1.31295	1.38765
CDH13	1.38e-24	2.11658	0.34191	1.96669	0.840903
CDH17	8.28e-25	0.0383827	2.06683	1.87818	0.948993
CDH2	3.88e-14	1.40972	2.73101	0.488661	2.46984
CDK11A	9.64e-26	0.0107666	2.05716	1.53612	1.58869
CDK11B	9.64e-26	0.0102989	2.05476	1.53251	1.58636
CDH5	0.00056189	2.34334	1.40529	1.59593	1.73985
CDH6	3.97e-43	1.86752	0.0605661	0.0429463	0.0533216
CDK12	0.00360912	0.00363988	1e-05	0.0102397	0.000274482
CDK13	0.0198391	0.00285724	1e-05	0.00533832	1e-05
CDK14	0.0230186	0.0257534	1e-05	1e-05	1e-05
CDK4	0.0476465	0.0491765	0.00972664	1e-05	0.0187453
CDK5	0.00054321	0.0119629	0.0351986	1e-05	0.238558
CDK6	0.0225695	0.0380996	1e-05	1e-05	0.00265227
CDSN	2.12e-18	0.297451	2.26698	3.92893	1.20708
CELA2A	7.45e-32	0.56581	0.841408	1.5407	3.6568
CELA3B	1.36e-06	1.83235	0.771901	0.366028	0.705135
CEACAM6	1.24e-39	1.9283	0.0574939	1.72858	0.162698
CEACAM7	1.86e-05	0.0682644	0.00797696	1e-05	0.00689142
CEACAM8	0.0334524	6.94843	5.75585	6.75375	5.97107
CEL	0.00522251	2.08909	1.54702	1.56758	1.25067
CELA3A	1.69e-11	90.6227	16.4631	24.0553	19.9279
CEMIP2	7.76e-14	0.337328	0.887568	0.866909	0.966047
CENPC	0.00248481	1e-05	1e-05	0.0194636	1e-05
CES1	1.48e-11	1.61861	2.32125	0.0786626	1.80507
CES1P1	0.00248481	1e-05	1e-05	0.00174461	1e-05
CES2	2.24e-35	1.9107	0.0726728	0.00849383	0.0862592
CETP	0.00024456	0.8183	0.541233	0.541272	0.584422
CFHR3	0.0125217	16.146	16.398	17.2597	19.2858
CFAP410	0.0230186	0.00510405	1e-05	1e-05	1e-05
CFD	0.00862431	2.22715	2.76409	2.81266	2.57594
CFHR1	0.0264741	16.6693	16.6466	18.4074	18.5022
CFHR2	0.00079733	3.87448	5.24481	4.90091	5.88287
CFHR5	7.71e-10	0.119699	1.84172	0.122288	1.34968
CFL1	0.00012551	3.80845	2.71051	3.09143	2.67742
CFP	0.0206539	0.965309	0.868813	0.931949	0.968781
CGREF1	7.33e-15	1.88369	1.73228	0.145797	0.724438
CHD1L	0.0199871	0.0129384	1e-05	0.0188837	1e-05
CHD4	0.0022769	0.214694	0.387916	0.246782	0.406072
CHD5	4.1e-12	0.00663348	0.00654138	0.00403008	0.818899
CHGA	0.00493288	0.836068	0.488337	0.137384	1.292
CHI3L1	0.0292401	5.37429	9.52717	6.46294	9.35325
CHID1	0.00016493	1.06422	0.836686	0.791588	0.79011
CHL1	0.0304934	32.0233	31.7067	33.9838	35.4832
CHMP4A	7.06e-28	2.11666	2.49993	0.419644	0.75687
CHRD	0.00248481	1e-05	1e-05	0.012491	1e-05
CHST3	0.00248481	1e-05	1e-05	0.0248863	1e-05
CHURC1	1.11e-25	2.79493	0.509767	0.321341	1.33612
CIAPIN1	0.0185279	0.244233	0.009587	1e-05	0.00376203
CIB1	0.0306678	0.00366695	1e-05	0.0174744	0.00157024
CISD2	1.47e-06	2.07108	4.5002	2.69116	5.36481
CKAP4	1.1e-10	0.238139	2.10558	1.83898	1.60156
CKAP5	0.0223455	1.75932	2.08263	1.62762	1.72337
CKB	5.73e-12	1.18805	2.06613	1.84401	0.963737
CKM	9.67e-10	0.413056	0.301775	0.232877	1.45553
CLASP2	8.82e-23	0.0192781	1.82309	0.115186	1.32554
CLEC12A	0.0154129	1e-05	0.018405	0.0326462	0.000837766
CLCNKB	0.00248481	1e-05	1e-05	0.00890577	1e-05
CLDN12	0.0468205	1e-05	0.483886	0.129876	0.0858251
CLEC16A	0.00931537	0.0173882	0.000981456	1e-05	0.00520022
CLIC1	1.34e-16	0.387856	0.532999	0.385304	2.10115
CLIC6	0.00878247	0.112254	0.0619271	0.0598529	0.385337
CLINT1	2.13e-13	2.22362	3.10141	3.19469	1.39116
CLMN	1.65e-15	0.493811	1.87725	0.0914018	1.03009
CLN5	4.11e-06	0.120025	0.0581749	0.0042356	0.0261675
CLNS1A	0.00737066	0.0310082	0.483875	0.634013	0.444656
CLPP	8.6e-16	1.5681	3.58333	5.7058	3.76092
CLPX	1.06e-21	21.6034	143.497	182.736	136.656
CLSTN1	2e-09	2.03192	1.30762	7.11342	2.09231
CLSTN3	0.00940593	1e-05	0.134671	1e-05	0.0348427
CLTCL1	0.00135469	0.379962	0.52471	0.535255	0.607044
CLUH	1.79e-32	0.104087	2.88819	3.38355	0.953595
CLYBL	2.72e-23	0.0739573	0.0501645	1.88759	0.0486848
CMBL	5.56e-28	11.2358	2.00156	2.24111	4.28002
CMPK1	4.72e-32	2.50293	0.335618	1.05232	0.187722
CMTR1	0.00018305	1.61926	2.4074	2.35009	2.30236
CNDP2	0.00702275	3.83717	2.08427	4.03034	2.6049
CNN1	3.07e-25	0.147497	2.16942	0.0778347	1.09148
CNN3	8.26e-12	10.6157	2.51847	4.14036	2.09005
CNOT1	1e-47	0.0263076	2.05775	0.0319075	0.0296192
CNOT9	0.00042274	0.00132102	0.0310199	0.00704959	0.235604
CNP	2.37e-26	0.105223	2.17892	0.0689068	1.17891
CNPY4	0.0354663	1e-05	0.0122498	0.0469768	0.0632753
COCH	0.023676	1e-05	0.021649	0.0608586	0.044264
COG1	2.96e-12	1.76739	1.96394	0.137048	1.2169
COG2	0.04508	0.106248	0.429756	0.412698	0.527945
COG4	3.24e-20	0.0208809	0.0188875	1.70042	0.0333113
COL11A2	3.61e-10	0.471153	0.622518	2.4664	0.844299
COL14A1	0.0208879	1.20536	1.38254	1.38157	1.62143
COL18A1	5.1e-12	0.0942117	1.58699	0.0953653	0.372584
COL3A1	8.37e-05	0.148381	0.589541	1.45316	0.774041
COL4A2	9.64e-05	1.98899	2.00966	0.390763	1.6315
COL5A2	4.69e-15	0.0923815	1.81892	1.74818	0.732438
COL5A3	0.00155012	22.9071	33.1733	22.7683	34.6268
COL6A2	1.65e-06	1.15309	2.23191	2.24213	2.22564
COL7A1	5.18e-27	2.00064	0.0482589	0.0193467	0.803196
COL8A1	0.00067405	0.0430457	0.105256	0.00561658	0.33957
COMMD2	8.97e-31	0.126085	2.15676	1.83897	0.680997
COMMD6	0.0358718	0.891874	3.17887	1.55125	2.62819
COMMD9	0.0149344	3.67104	3.78692	2.4454	3.49344
COMP	0.0138692	1.89929	1.24306	1.09153	1.3559
COMT	7.85e-22	0.140211	2.21006	2.18977	1.58961
COPA	0.00025357	0.311374	0.684564	0.294133	0.714228
COPB1	0.00096715	0.922119	0.691275	0.826217	0.637361
COPB2	1.91e-23	0.110804	2.06858	1.80927	1.81482
COPG1	1.25e-05	2.03987	0.957828	1.10407	0.887483
COPS2	1.85e-09	2.35093	2.54159	0.44368	2.60478
COPS4	3.84e-24	3.77814	2.52043	0.618076	1.09323
COPS6	0.00551192	3.54766	2.73988	2.46512	2.52985
COPS7A	9.14e-11	2.00239	2.21316	0.186969	1.72396
COPS8	2.26e-05	4.14538	6.70877	7.39411	6.68128
COQ6	1.08e-31	1.85966	0.0528639	0.108669	0.283072
CORO1B	9.1e-07	2.50198	2.09065	1.95775	2.58186
CORO1C	3.7e-23	0.369646	2.39801	1.73687	1.76363
CORO2A	1.11e-30	5.22361	5.75886	6.46032	2.59962
CORO7	2.02e-20	2.59977	0.947603	0.117561	2.20387
COX2	4.66e-05	0.100914	8.13907	5.41112	9.46736
COX5A	0.00088083	0.360559	0.35761	0.194069	0.916676
COX6A1	0.0341185	1.526	11.5815	0.222589	6.81802
CPA2	1.23e-25	0.265681	2.11687	0.0561169	1.70189
CPB1	0.00107449	0.435848	0.585262	0.512903	0.621968
CPE	2.99e-06	0.269237	1.66261	1.5032	1.29079
CPN1	0.0404606	11.1024	10.1742	10.1131	11.691
CPN2	0.0213525	22.6785	20.1481	20.86	20.5623
CPNE1	4.98e-15	0.343731	0.169829	1.99903	1.33166
CPNE2	1.33e-14	0.907679	0.173362	0.249841	1.06032
CPNE5	2.92e-30	0.017279	0.0518799	1.8201	1.46749
CPNE8	2.03e-18	0.0677036	0.0487971	1.62091	0.137057
CPOX	2.01e-07	0.00964229	0.135652	0.0133944	0.522595
CPQ	2.14e-38	2.21684	0.388322	2.11518	1.13317
CPS1	0.0111526	4.35335	2.75561	2.18055	2.60888
CPSF1	1.5e-30	0.150013	2.46475	0.482573	0.806376
CPSF6	2.61e-17	0.380222	0.223568	1.96466	1.04602
CPT1A	6.28e-23	0.085631	0.121825	0.0510256	1.40771
CPT2	2.3e-09	0.154016	2.132	1.9012	1.64538
CPVL	0.00428366	3.02662	2.78509	3.48633	2.11128
CR1L	0.00248481	1e-05	1e-05	0.00641465	1e-05
CRABP2	8.39e-10	23.9986	69.592	81.7359	57.2458
CRELD1	0.0344779	0.00304879	0.017654	1e-05	0.0151135
CRISP3	1.25e-32	2.39136	0.324683	0.137315	0.261619
CRNKL1	9.47e-05	1.9874	2.29659	2.15697	1.55617
CROCC	7.78e-38	0.463433	2.06995	1.93376	0.244546
CRP	0.00506863	4.38352	2.23956	2.25574	6.4594
CRTAP	2.25e-23	1.95652	0.0808255	1.84643	1.11472
CRYAB	0.0430972	0.216492	0.128731	0.082875	0.0753194
CRYL1	6.06e-18	0.819444	2.6739	2.41609	2.36291
CRYZ	0.00186563	1.64614	1.47407	2.43987	1.70372
CRYZL1	0.0125171	0.00742711	0.0485863	0.102736	1e-05
CSDE1	5.6e-26	0.0211378	0.0281973	0.0386935	1.42783
CSE1L	3.21e-13	0.638069	1.79576	1.78099	0.528948
CSF1	0.00305783	0.0896916	0.0276427	0.0421539	0.0330257
CSN2	0.0466351	12.7307	12.661	17.9386	16.8169
CSNK2A1	0.00179497	1.56437	2.33374	2.1175	2.41897
CSNK2A3	1.44e-07	0.49083	0.557033	1.65099	0.751779
CSNK2B	1.25e-19	0.0343583	9.16093	16.5186	4.91561
CSPG4	0.0130712	0.781246	0.922397	0.958526	1.12744
CST3	1.59e-07	5.40566	4.04489	3.23655	4.51434
CST6	3.93e-11	0.428375	0.625679	0.904429	1.52857
CSTA	5.38e-18	1.59469	2.67386	3.2164	2.35897
CSTB	7.55e-19	3.88109	6.84193	4.49775	5.95403
CSTF1	3.81e-34	5.12532	1.32474	0.0743173	0.941106
CSTF3	9.31e-15	0.48041	0.316914	1.85903	0.730804
CTBP2	0.00853705	0.02523	0.118394	1e-05	0.0241955
CTBS	2.3e-08	0.565687	2.01138	1.85281	1.4172
CTDSPL2	0.00248481	1e-05	1e-05	0.00291184	1e-05
CTHRC1	0.00344908	1e-05	1e-05	0.400712	0.00443095
CTNNA1	1.23e-06	2.11515	0.740102	0.968104	1.71234
CTNNA2	9.49e-16	0.115721	0.16689	1.94097	0.138796
CTRC	0.00395282	0.0107387	0.0753034	0.292104	0.037231
CTNND1	5.71e-05	0.409642	1.64851	1.56541	0.893804
CTNND2	3.21e-24	0.0755575	1.77882	1.78865	1.3767
CTPS1	3.39e-06	1.21941	2.10904	1.81698	1.25388
CTPS2	5.48e-18	0.0122646	0.135813	1.95079	0.751452
CTR9	8.56e-26	0.0882772	0.148477	0.0685452	1.51405
CTSG	2.63e-05	1.83815	2.96174	2.91009	3.28916
CTSH	0.041129	1.21356	1.63579	2.1797	2.01994
CTTN	5.38e-06	3.31638	2.46624	2.28279	2.75562
CTTNBP2NL	0.0360994	0.0158151	1e-05	0.0123372	1e-05
CUL1	6.69e-07	1.80718	0.43479	0.638494	0.555253
CUL2	0.0443035	1.3037	1.56453	1.83363	1.54983
CUL3	2.19e-41	1.86185	0.0798123	0.0522483	0.0813
CUL5	0.0424059	0.0394171	0.0304657	0.0806278	0.01125
CUTA	1.55e-09	0.725485	1.93119	0.415039	1.35275
CWC27	1.99e-28	0.279574	2.27899	2.06722	1.38484
CWF19L1	0.011861	0.0417513	0.0802996	1e-05	0.14587
CXADR	6.63e-11	6.59754	3.83556	1.40729	3.78206
CYB5A	1.65e-28	2.26932	0.343119	0.239331	0.495384
CYB5R1	9.7e-18	0.1708	0.292982	0.237791	1.46844
CYB5R3	1.04e-12	1.14063	1.18183	2.11703	2.13605
CYCS	1.07e-17	5.47979	13.0104	29.3971	22.9786
CYFIP2	5.06e-15	0.0413874	0.0651476	1.86571	0.552976
CYGB	0.00271869	0.246011	0.0555283	0.0968404	0.174769
CYLD	0.0355381	0.0011287	0.00377007	0.0199162	0.0716894
CYP4F11	2.59e-27	1.97103	1.61913	2.09412	2.47753
CYP4F2	4.87e-26	2.04202	1.95764	2.13827	2.36274
CYP51A1	0.00121186	1.06031	1.18467	0.932386	1.42935
CZIB	5.22e-52	2.91756	0.145685	0.162186	0.0684499
DAB2IP	0.030374	1e-05	1e-05	1e-05	0.00560835
DAG1	2.39e-08	0.1351	0.252973	1.42919	0.25038
DAP3	0.0141678	0.00867358	0.246654	0.207274	0.215227
DARS1	7.87e-19	1.20337	3.37202	3.96918	4.18855
DAZAP1	8.96e-26	0.394217	2.86544	2.69433	2.69823
DBN1	5.13e-12	0.0794341	0.103828	1e-05	0.792334
DCD	7.22e-07	1.51666	2.60935	2.53239	2.73215
DCDC2	0.0230186	0.0106008	1e-05	1e-05	1e-05
DCK	0.0230186	0.0803076	1e-05	1e-05	1e-05
DCLK1	0.022568	0.0157704	0.0319298	0.0638231	0.0167979
DCN	0.00582123	1.27624	1.74535	1.26307	1.86907
DCPS	0.0187559	0.366123	0.326973	0.311411	0.281103
DCTN3	0.0299885	1e-05	0.0108848	0.239903	0.0769144
DCTN4	1.9e-43	2.10469	0.414557	0.216322	0.101968
DCTN5	0.0432481	1e-05	0.0345014	0.00978444	0.0268309
DCXR	1.74e-17	0.225369	0.595515	0.401717	1.88173
DDAH1	2.22e-16	3.85774	4.22449	0.879462	2.94725
DDAH2	8.43e-06	2.25555	3.24712	2.55946	2.96825
DDI2	2.89e-06	0.0942029	0.111	0.00526038	0.707036
DDR1	1.15e-08	19.6206	14.415	7.62817	11.3473
DDRGK1	3.72e-33	0.0103012	2.55486	0.674852	2.67402
DDX17	0.045825	0.461612	0.377973	0.445754	0.383264
DDX18	2.95e-09	2.21929	2.28707	1.06637	1.46242
DDX23	2.37e-16	0.423803	1.72826	0.127876	1.00996
DDX39B	2.27e-08	2.09816	0.126481	0.156725	0.594156
DDX3X	0.0004988	0.368437	0.727692	0.576225	0.643093
DDX3Y	0.00056176	1.67478	1.94068	0.713281	1.64037
DDX42	0.00652298	1.74583	1.67685	1.73914	1.13334
DDX46	0.00251429	2.6975	2.18603	2.31393	2.86889
DDX5	1.47e-26	0.0604125	1.98322	0.0725605	1.47738
DDX50	1.36e-29	0.0585553	0.536413	1.72693	0.54472
DDX54	0.0191198	0.00984598	0.000539183	1e-05	1e-05
DEFA6	0.0359112	0.0414189	0.107601	1e-05	0.108072
DDX58	2.89e-29	2.73944	0.53462	2.3263	0.58314
DDX59	0.00248481	1e-05	1e-05	0.00304144	1e-05
DERPC	2.35e-34	1.33606	0.220259	2.08757	0.309423
DENND4C	6.81e-42	1.91233	1.73648	0.0088928	0.0531003
DFFA	0.00040185	0.214332	0.16368	0.127865	0.512494
DHRS4L2	0.00248481	1e-05	1e-05	0.0514637	1e-05
DHRS7B	1.31e-07	3.21275	4.95319	5.21311	4.52558
DHX30	1.68e-21	0.0688868	1.56589	1.69016	1.20121
DHX38	4.84e-23	0.016739	0.12247	0.115445	0.106994
DHX9	1.52e-06	1.62259	0.378377	0.261351	0.382897
DIABLO	0.00394311	14.2919	21.4263	16.8995	19.2184
DIAPH1	0.0361841	0.640471	0.485293	0.637521	0.332046
DIP2B	3.05e-10	3.41159	1.13393	1.76838	1.38696
DKK3	1.04e-21	1.93982	0.422857	1.68703	1.69215
DLAT	5.32e-41	1.99846	0.036415	0.137694	0.0516373
DLD	3.18e-17	0.583132	2.0336	0.794748	0.832801
DMPK	5e-42	2.40816	0.20761	0.197912	0.212713
DNAJA3	0.0130802	0.0118913	0.155804	0.13533	0.290176
DNAJB1	0.00137431	1.92251	2.34491	1.96334	1.80129
DNAJC11	0.00012032	1.98305	1.98171	0.657956	1.51051
DNAJC13	5.22e-10	1.74761	1.60818	0.354604	0.313472
DNAJC19	0.00248481	1e-05	1e-05	0.028904	1e-05
DNAJC9	7.86e-20	1.94432	0.177818	0.249226	1.04314
DNM1	3.61e-05	0.0894208	0.0233747	0.0106851	0.584835
DNM1L	5.91e-30	0.186608	0.892389	1.9682	1.88241
DNM2	1.73e-29	0.0390057	1.96686	0.00868821	1.71965
DNM3	0.00142117	0.0289609	0.074022	0.0106969	0.533568
DNMT3A	0.00808509	0.0486352	0.00848832	1e-05	0.00101425
DNTTIP2	0.00053043	0.0858817	0.0104342	0.00993497	0.0302162
DOCK1	2.26e-12	1.92683	0.503527	0.617116	0.614361
DOCK10	1.39e-26	0.0606499	0.012849	0.0213515	0.013997
DOCK2	9.3e-16	1.88327	1.8874	0.0138115	0.933802
DOCK5	3.29e-30	0.113882	2.09207	0.549035	0.984036
DOCK6	0.0167913	0.00101008	0.0108498	0.0164923	0.00940957
DOCK7	1.87e-21	0.190863	2.20779	2.07114	2.01083
DOCK8	4.98e-10	1.69039	0.178119	1.57428	0.953844
DOCK9	0.00897788	0.366959	0.561665	0.794397	0.944503
DPEP2	1.33e-22	3.65839	0.927697	0.961508	0.907465
DPP4	0.025052	0.885297	1.87162	1.2431	0.916371
DPP7	8.5e-33	2.33065	0.408041	0.452556	0.271865
DPY19L1	0.00242781	0.224436	0.000829046	1e-05	1e-05
DPYSL3	4.17e-08	0.779023	0.418937	0.410615	1.72762
DRG1	1.87e-25	4.83591	1.63249	3.24716	1.59968
DSG2	0.00051636	0.291701	0.42562	0.397401	0.94091
DSN1	0.00248481	1e-05	1e-05	0.00419046	1e-05
DST	2.25e-23	0.0114591	0.140514	0.14644	0.132144
DSTN	2.25e-40	2.16599	0.108407	0.0878803	0.171772
DTNA	1.06e-12	0.282873	0.313378	2.05898	0.694423
DTNB	0.00222371	0.354739	0.352235	0.42805	0.738868
DTX3L	0.0017923	0.309162	0.418487	0.39513	0.363297
DUOX1	2.65e-18	0.012705	0.0541852	1.69003	0.923489
DUOX2	1.24e-08	0.0415576	0.0891802	0.0353856	0.870417
DYNC1I2	0.00141279	0.654708	0.851373	0.525468	0.770774
DYNC1LI2	1.96e-06	0.542923	0.507077	1.72987	1.05584
DYNLRB1	1.14e-20	0.0781623	1.30139	2.71007	2.78696
DYSF	9.85e-05	2.1509	2.57359	1.09126	2.30466
EARS2	0.00850756	0.27862	0.0844016	0.083765	0.0597513
ECE1	0.00360162	0.00476093	0.0489981	0.00332769	0.213902
ECH1	0.00123822	2.12495	2.60202	1.29078	2.50678
ECM2	0.0230186	0.136717	1e-05	1e-05	1e-05
ECPAS	3.34e-05	0.53878	0.406671	0.608998	0.746368
EEF1AKMT4	0.020613	1e-05	0.139958	0.452398	0.403701
EEF1D	0.00089015	3.21407	4.25609	1.26775	4.45362
EEF1G	0.0001874	0.654614	1.86194	1.94669	1.85829
EFNA1	0.00226749	1e-05	1.25426	0.49763	0.370248
EFHC1	0.00248481	1e-05	1e-05	0.00680519	1e-05
EFL1	1.09e-05	0.25002	0.141057	0.230544	0.175862
EFNB1	1.14e-17	0.172492	0.107351	1.91918	0.102785
EFTUD2	0.0070852	0.405277	0.641765	0.500285	0.768511
EHD1	3.28e-17	0.612511	3.50732	3.77642	3.22087
EHD2	9.29e-07	1.08016	1.89329	1.9552	1.01886
EHD3	2.04e-10	2.23373	1.16603	0.727905	1.55993
EIF2AK3	0.00385263	9.24203	20.3774	20.0201	22.1174
EIF2AK4	0.00875771	0.000776863	0.00856977	0.0166124	0.0131622
EIF2S1	5.95e-07	0.108433	0.12454	0.0411545	0.628707
EIF2S2	0.0441938	0.0387874	0.117375	0.0162637	0.273629
EIF3D	1.44e-10	0.498145	2.06727	2.25901	1.53269
EIF3E	5.83e-05	1.7588	0.435924	0.278462	0.83737
EIF3G	8.63e-24	0.261084	3.24283	2.81064	2.13561
EIF3H	7.13e-05	0.177667	0.0641292	0.0672266	0.626586
EIF3I	1.59e-21	1.88387	0.174703	0.18321	0.711808
EIF3J	1.69e-08	1.88384	1.23333	1.92983	1.40997
EIF3K	0.00423674	0.00924403	0.439821	0.142265	0.284451
EIF3L	4.4e-08	4.00175	3.91999	4.49813	2.12808
EIF4A3	9.98e-08	0.678721	0.616784	0.71911	1.68807
EIF4B	1.67e-31	0.0572479	0.0841934	0.0664181	1.69324
EIF4G1	1.56e-10	1.75959	0.413686	0.479824	0.802929
EIF4G2	4.02e-08	0.530613	1.53459	0.390452	1.37383
EIF4G3	1.78e-26	0.115132	0.109776	0.159431	1.55361
EIF4H	0.0293775	0.155876	0.088028	0.0583765	0.330537
EIF5	0.0461558	0.155813	0.187958	0.00107017	0.0952372
EIF5A	1.96e-06	2.75569	2.08339	2.6567	2.7216
EIF5B	1.9e-15	0.378571	3.57421	1.86419	2.35696
ELAC2	1.34e-40	1.82276	0.0314153	1.87031	0.0324813
ELF1	3.73e-15	0.273904	0.160027	2.28754	0.720204
ELMO1	0.0207385	0.0345501	0.00486355	1e-05	0.00199391
ELMOD2	0.00027506	2.65789	0.338496	0.904765	0.305336
ELN	3.55e-39	2.0637	0.172318	0.176625	2.05498
ELOVL1	3.15e-25	0.194826	1.63289	1.35249	1.57159
ELOVL7	0.00918879	1e-05	1.1018	1e-05	0.422481
ELP1	0.00171374	2.48955	2.20797	1.838	2.5248
EMC2	6.38e-21	4.47177	2.00974	2.40326	4.59206
EMC8	1.33e-11	3.52021	0.7697	0.0891535	1.32504
EML2	1.97e-17	0.0584238	0.0723499	1.81674	0.155271
EML4	4.15e-45	0.0405981	2.45882	0.0133108	0.524137
ENDOD1	0.00716246	1.86436	2.01464	1.89043	1.48464
ENO1	0.0262157	7.95136	5.54376	3.58574	7.58099
ENO2	0.00126071	7.68013	3.56353	2.64041	4.75864
ENO3	0.00011754	6.89916	3.17263	2.38839	4.3245
ENPP2	0.00281955	5.91214	7.19246	1.91495	4.9501
ENPP6	0.00025513	0.0464768	0.0162562	0.0136431	0.351546
ENPP7	8.23e-12	0.892043	0.317455	0.329984	0.653377
ENTPD5	1.15e-21	0.821068	1.41096	4.68961	1.66438
EOGT	3.07e-10	0.164098	0.270711	0.324505	1.08604
EP400	0.021286	1e-05	0.0147443	0.0274373	0.00947424
EPB41	6.84e-31	1.72964	2.12554	0.0177731	0.558007
EPB41L1	3.15e-10	0.0569984	0.130779	0.428797	0.421603
EPB41L2	0.046282	0.733318	0.75926	0.860949	0.651222
EPB41L3	2.75e-17	0.0593491	0.0211438	1.80261	0.0682739
EPB41L5	1.23e-09	1.76517	0.835465	0.88704	1.60266
EPB42	9.64e-20	6.07131	16.8722	19.0733	20.3775
EPCAM	0.00300794	0.973713	0.875513	1.2388	1.25591
EPDR1	0.0185756	1e-05	1e-05	0.0822836	0.0192461
EPHA4	1.29e-09	0.444642	0.543566	1.68104	0.518304
EPHB1	2.37e-27	0.0140422	1.88479	1.6893	0.597172
EPHB2	6.55e-23	0.0142801	1.8858	1.69022	1.48362
EPHB3	0.0220932	0.0092136	0.00309778	0.0755501	0.0331546
EPHX1	0.00245221	3.36648	2.82131	3.18259	2.77962
EPN1	4.23e-05	0.603001	0.0820822	0.0469946	0.103932
EPN2	0.00615517	0.0872903	0.200024	0.0678932	0.44783
EPPK1	0.00782708	1.16389	1.53051	1.41896	1.57517
EPS15L1	4.38e-47	0.0227146	2.07392	1.61634	0.0463532
EPX	0.0051594	1.75762	1.85942	0.398032	1.69823
ERAP2	1.85e-09	0.626958	1.93958	2.03382	1.81112
ERCC5	1.11e-25	0.763224	4.28365	3.40479	3.3553
ERCC6L	0.00248481	1e-05	1e-05	0.00535317	1e-05
ERO1A	0.0168413	0.37207	0.0426676	0.0739591	0.0463034
ERP27	0.0230186	0.00163277	1e-05	1e-05	1e-05
ERP44	6.72e-34	0.479922	2.68797	2.331	0.68671
ESAM	7.26e-05	0.111609	0.121873	1.81582	0.616716
ESYT1	2.52e-14	1.69324	1.9958	0.00506396	1.17787
ESYT2	3.41e-21	1.9472	0.159321	0.0825464	0.921614
ETFA	2.76e-08	1.97503	0.793679	1.85635	1.70482
ETFB	0.0318092	0.373092	0.0771068	0.132097	0.0658258
ETHE1	0.00298111	0.810946	1.05118	0.865763	0.988029
EVA1B	0.0400389	0.13566	0.0257642	1e-05	1e-05
EVPL	0.00460043	1.84446	2.10219	1.65143	1.55122
EXOC1	5.39e-27	64.0661	9.98578	9.98506	12.8749
EXOC4	1.29e-27	0.0466798	1.78828	0.185097	0.725939
EXOC5	0.00765624	0.159126	0.0342217	0.144431	0.0176019
EXOC6B	0.0367477	0.0185577	0.143083	0.198836	0.301203
EXOC7	1.45e-29	1.84109	0.020884	0.00439985	0.356499
EXOC8	2.5e-31	0.0367415	0.125777	1.83165	1.53378
EXOG	0.0079519	2.57772	2.75405	2.1299	2.74488
EXOSC3	2e-10	0.424574	0.543826	2.30363	0.969484
EXT2	0.0250166	1e-05	0.00163165	0.0089806	0.0124129
EZR	0.0359782	4.28601	4.3428	2.97124	3.87881
F11	0.0218961	3.72634	3.01052	3.05967	3.07205
F11R	2.12e-49	0.199052	2.37628	0.171276	0.240398
F12	0.0459978	4.7074	4.0565	4.26207	4.22889
F2	0.0245115	58.2913	63.1822	59.6962	55.6686
F7	6.54e-16	0.473711	0.340779	0.324734	0.472966
FABP7	0.0003045	0.102825	0.00535613	0.0246038	0.00705199
FAF2	6.86e-22	0.150373	0.334446	2.14325	0.170693
FAH	0.0090031	5.74403	69.2342	39.4709	40.8505
FAHD2B	0.00032644	1e-05	0.00279661	0.00914819	1e-05
FAM102A	1.19e-20	0.380692	2.34931	2.15936	1.25309
FAM111A	0.00135171	0.0318987	0.0391605	0.248113	0.0789507
FAM114A1	6.6e-24	0.373744	2.17994	1.05155	2.15067
FAM120C	0.0304189	0.00507192	0.026698	0.00949997	0.0124295
FAM126A	0.00196385	0.0951545	0.0709794	0.00784325	0.0394772
FAM135A	2.08e-33	0.166768	2.07508	1.65752	0.346894
FAM169A	0.0370541	0.0113774	0.0133908	0.0205395	1e-05
FAM172A	5.43e-17	6.09617	5.68642	7.17823	3.87503
FAM83E	0.0191198	0.101494	0.0170367	1e-05	1e-05
FAM83H	3.7e-34	2.05086	0.0486505	0.0391023	0.255663
FAM91A1	6.16e-19	0.0248523	0.0559156	1.68467	0.0727207
FAM98A	1.43e-19	0.216816	2.31955	2.09573	1.87635
FAP	1.49e-22	1.86372	0.04406	0.0382263	0.940299
FARP1	3.91e-33	0.0258524	3.97624	1.05763	3.63938
FARSB	1.51e-25	0.0984082	2.17706	0.257745	1.44681
FAT1	0.00041237	1e-05	1e-05	0.00588454	0.000504247
FAT2	1.14e-07	1.27749	1.02643	0.994194	1.00262
FBLN5	1.91e-20	1.74714	0.112099	0.368512	1.17999
FBN2	3.84e-05	0.208718	0.214752	0.167667	0.193754
FBP2	0.0135203	0.675589	0.615545	0.656677	0.877978
FBXO22	8.76e-21	1.94631	0.291676	0.169912	0.777129
FBXO3	0.0001251	0.0322377	0.0749332	0.0243436	0.527766
FCER1G	0.00248481	1e-05	1e-05	0.0731189	1e-05
FCGR2A	2.87e-21	0.149529	2.18084	1.96197	1.89558
FCGR2B	0.0467862	0.0140185	0.0103027	1e-05	0.000893215
FCGRT	4.7e-10	1.60798	1.22987	0.963436	2.39877
FCHSD1	9.16e-51	1.89345	0.0134776	0.0116063	0.0089393
FCN1	1.04e-14	2.24008	0.829793	0.880979	1.56309
FCN2	0.0142016	3.15322	2.40245	2.64836	2.18428
FCSK	2.24e-23	0.0716295	2.05015	1.68623	0.964396
FDPS	9.59e-46	2.15085	0.138365	2.09832	0.129291
FDX1	1.95e-12	7.09131	4.65674	5.01249	4.32772
FDXR	2.44e-37	0.136818	2.03921	0.227529	0.342362
FER1L4	3.26e-09	0.641385	1.77899	0.562089	1.76409
FERMT2	0.00727753	1.64716	1.74811	0.715472	1.34564
FERMT3	0.00291104	1.76776	1.79617	0.825247	1.13196
FES	4.58e-24	0.286005	2.07146	1.08056	1.55876
FETUB	0.0190019	3.20394	2.78696	2.78763	2.85264
FGA	0.0145675	22.5796	165.099	164.745	84.4088
FGFR1OP	0.0471428	0.0188942	0.0037631	1e-05	0.00523928
FGG	0.0232576	3.20491	149.861	159.05	41.0701
FH	1.46e-07	2.03591	1.11019	2.26674	2.04194
FHOD1	1.01e-34	1.92883	0.141132	1.63857	0.188166
FKBP10	0.044658	0.179378	0.268362	0.139378	0.793051
FKBP15	4.67e-37	0.021229	0.335999	1.60113	1.8258
FKBP2	0.00031894	2.16005	1.18639	1.75422	1.73116
FKBP3	2.42e-18	2.52931	0.787994	1.27679	1.97088
FKBP4	2.25e-27	1.86982	0.0550279	0.036117	1.47041
FKBP9	1.88e-05	0.27125	1.68056	1.71492	1.4182
FLAD1	4.6e-24	0.154084	0.475243	1.64454	0.701945
FLG	1.47e-06	0.019781	0.0466255	0.038484	0.524441
FLG2	6.42e-05	1.71209	0.0975109	0.106935	0.108162
FLII	0.0342327	0.270058	0.342209	0.24141	0.313568
FLOT1	1.35e-14	2.07042	0.668093	0.484117	0.60058
FLOT2	5.11e-12	2.07079	2.15825	0.0754571	2.09189
FMOD	9.56e-15	2.27779	2.10194	3.41493	2.79248
FN1	2.81e-06	65.7328	76.0323	75.1665	79.6242
FN3KRP	0.0004133	0.22948	0.00281748	1e-05	0.0446961
FNBP1	0.0155619	0.0362231	0.016653	0.022248	0.0240108
FNDC3A	1.63e-11	2.43619	2.57407	2.32993	1.23825
FOLR1	0.00248481	1e-05	1e-05	0.00208967	1e-05
FOXO3	0.00033606	0.015417	1e-05	1e-05	0.00110047
FOXRED1	0.0360758	0.00213849	0.025031	0.0369891	0.00639557
FSCN1	1.68e-23	0.0498805	1.72932	0.0412937	1.2031
FTH1	4.91e-15	0.860376	4.35996	1.70017	4.13683
FTSJ3	0.0374787	0.147181	0.0253882	0.020738	0.0453964
FUBP1	5.05e-05	1.75449	3.07384	0.449971	2.16235
FUCA1	6.86e-08	1.58554	0.356199	0.366786	1.50636
FUT3	0.00443316	0.454431	0.432329	0.968034	0.99988
FUT5	0.00640838	0.516397	0.491281	1.10004	1.1091
FXR1	8.78e-05	2.866	2.53538	2.23477	3.15079
FXR2	0.0267986	0.054227	0.037452	0.168418	0.000350577
FYN	0.0440017	0.079228	0.0340346	0.0587648	0.2567
FZD6	0.0427038	0.0397995	0.00131537	1e-05	0.00417962
G3BP1	3.61e-19	0.125959	0.184832	1.84384	0.173637
G6PD	0.00016792	3.60988	6.00843	6.8141	6.34034
GABPA	0.0180095	1e-05	1e-05	1e-05	0.0241824
GADD45GIP1	4.64e-17	0.0485003	0.113072	1.98212	0.295016
GAK	6.05e-25	0.0248695	1.93023	1.77249	0.7209
GALE	3.61e-12	4.02628	4.09523	3.0409	5.59711
GALK1	5.54e-10	1.81423	2.01495	0.317745	1.16635
GALK2	3.41e-07	35.6405	13.0074	2.09891	14.2506
GALM	1.08e-36	0.0525166	0.218606	1.99676	1.92543
GALNT2	2.37e-18	2.1168	2.22772	0.0448872	1.09393
GAN	0.0308135	0.407959	0.0432169	0.148721	0.0515429
GANAB	0.0011595	1.51196	2.23136	2.23234	2.14715
GAPDH	0.0136242	6.06659	4.77478	3.56628	5.53624
GAPVD1	1.62e-17	0.0219551	0.0878698	1.85414	0.0442969
GARS1	1.03e-49	1.78819	2.31821	0.0912371	0.0913279
GART	1.2e-22	1.86008	0.0961499	0.0105591	0.993823
GAS2L1	0.0002283	0.00657639	1e-05	0.0140984	1e-05
GAS2L3	0.00248481	1e-05	1e-05	0.00761859	1e-05
GAS6	0.00301538	4.37575	3.6348	4.17072	3.8676
GBE1	8.2e-19	0.129466	0.626806	0.524287	0.635611
GBF1	7.1e-26	0.078359	1.64271	0.202014	0.366858
GBP5	1.19e-23	0.0529129	2.37347	1.90429	1.754
GCG	0.0319141	1e-05	0.163358	0.338489	0.279612
GBP7	0.00953342	1e-05	0.020502	1e-05	0.00445801
GCA	3.34e-11	2.38096	3.3989	0.551539	2.6019
GCC2	0.00011203	0.0260167	0.00242967	0.0204389	0.00258388
GCLC	0.00208058	0.517138	0.754458	0.713892	0.934945
GCLM	1.81e-21	0.735503	0.21939	0.180261	0.287547
GCSH	7.75e-49	2.41998	0.10637	0.0549729	0.175286
GDA	9.95e-18	2.49926	1.92639	0.0627426	4.76916
GDPD1	1.67e-49	1.98339	0.0212062	0.133746	0.0281486
GET3	0.0248278	2.58518	2.90616	2.70923	3.11337
GFAP	0.00150615	1.27247	1.71567	2.09262	1.76489
GFOD2	0.00248481	1e-05	1e-05	0.032663	1e-05
GFPT2	0.0440568	0.0771571	0.0688222	0.0733655	0.0708054
GGT2	4.62e-07	7.15839	5.3893	5.54292	5.48838
GGT3P	1.65e-07	7.35617	5.61336	5.79574	5.6843
GGCT	5.85e-05	1.84052	2.27739	0.569691	1.68322
GGH	0.00099654	5.74479	3.36634	2.47024	3.37648
GGT1	3.28e-07	7.58032	5.79657	5.88272	5.89817
GID8	9.31e-34	2.09865	0.176823	0.0723261	0.204599
GIMAP5	0.00122056	0.116436	0.622894	1e-05	0.146865
GIMAP6	0.0230186	0.0584232	1e-05	1e-05	1e-05
GINS1	0.0452774	0.0767361	0.0448392	0.0893679	0.297049
GINS3	4.7e-22	0.133711	0.164879	2.2497	0.22728
GIPC1	2.04e-07	2.2829	2.12737	1.09475	1.40948
GIPC3	6.7e-12	2.01167	2.02638	1.65185	0.943058
GIT1	3.24e-11	1.73438	1.81522	1.77201	0.795222
GIT2	1.59e-17	0.0512633	0.0763693	0.066239	1.20793
GK	4.08e-30	0.138814	3.04047	2.62912	1.11496
GK3P	5.65e-30	0.143152	3.07548	2.65599	1.13329
GLA	2.22e-35	2.21085	0.255625	0.123004	0.266221
GLB1	0.0379041	0.166241	0.696367	1.20548	0.0525984
GLOD5	0.00248481	1e-05	1e-05	0.0366594	1e-05
GLG1	1.08e-05	1.527	1.93494	0.194017	1.3197
GLIPR2	6.85e-07	2.81232	4.24253	0.870357	3.55399
GLO1	3.59e-20	2.67454	0.792634	4.02911	2.03618
GLOD4	0.00433702	0.42457	0.610957	0.61012	0.699431
GLS	2.22e-10	1.861	0.562935	1.80584	1.72757
GLUD1	0.00131151	0.126363	0.235437	0.296893	0.21534
GLUD2	1.04e-10	1.58988	1.80456	0.0433243	1.71983
GM2A	0.0114172	1.16061	1.29589	1.41985	1.67698
GMDS	0.00283704	0.0289386	0.0219574	0.0785842	0.428959
GMFB	2.94e-07	2.62654	0.150678	0.127069	0.0882076
GMPR2	1.78e-13	0.455956	0.819871	0.87255	2.3836
GMPS	0.00349409	5.26999	3.85515	3.49049	4.22049
GNAT1	8.51e-09	1.46132	0.105641	0.158093	0.156732
GNAI1	0.00284891	0.191694	0.133146	0.188571	0.18136
GNAL	3.19e-08	1.45886	0.102717	0.153578	0.154303
GNAQ	2.04e-34	0.0618403	1.92174	2.06578	0.852222
GNAT2	2.84e-08	1.45886	0.103239	0.153578	0.15326
GNAT3	1.93e-07	1.45664	0.100892	0.155523	0.152071
GNAZ	0.0133967	0.011317	0.00196537	0.0241758	0.00324866
GNB1L	0.00247825	0.0229664	1e-05	1e-05	1e-05
GNB3	0.00248481	1e-05	1e-05	0.0025415	1e-05
GNL1	2.35e-13	1.33764	2.17407	2.26466	2.25938
GNPAT	5.9e-35	1.80828	0.043761	0.0175246	0.0314691
GNPDA1	1.22e-16	0.482353	1.90379	0.185001	1.69201
GNPDA2	8.93e-23	2.05661	0.168761	0.0662192	0.707693
GNS	0.00726809	1.35446	1.19248	1.04595	1.16606
GOLGA2	0.00470932	0.043256	0.020113	0.010977	0.237864
GOLGB1	3.75e-39	1.6646	1.99029	0.0282661	0.220957
GOLM1	7.34e-07	1.86939	2.59717	1.67557	3.27876
GON7	7.74e-18	0.141866	0.3652	2.30348	0.225744
GOT1	0.00380349	0.742214	0.923177	1.35194	0.969896
GPA33	1.29e-11	3.13476	0.941792	1.15933	1.86854
GOT2	0.00732719	5.28778	11.3162	8.11216	10.0273
GP1BA	0.00476917	0.474782	0.465575	0.358326	0.48997
GP5	0.00025502	0.838268	1.38591	1.20966	1.40932
GP6	4.51e-41	1.8743	0.036478	0.0522237	0.0330651
GPC2	0.00248481	1e-05	1e-05	0.00222845	1e-05
GPC4	0.00810012	0.0367077	0.00251201	0.0185462	0.00383795
GPD1	5.64e-11	0.484461	1.95436	0.340978	1.57603
GPD1L	0.0338649	1e-05	0.00588301	0.868679	0.183339
GPD2	5.37e-10	1.24908	2.84404	1.82026	2.05478
GPNMB	0.00050896	0.427753	0.818999	0.485784	0.609786
GPRC5C	9.93e-43	2.15241	2.17054	2.1354	0.224165
GPS1	0.0456989	0.00520685	0.0534203	0.046114	0.0158637
GPSM3	0.0351382	0.23021	1e-05	0.261702	1e-05
GPX2	5.72e-15	0.163915	0.815766	2.58383	0.552484
GRAP	0.00248481	1e-05	1e-05	0.063064	1e-05
GRB10	0.0210694	0.139597	0.0241929	1e-05	0.0303854
GRK2	3.54e-33	0.158948	2.04464	1.72403	0.353689
GSDMA	6.85e-05	0.410496	0.382255	0.0954556	1.05662
GSDME	3.71e-10	2.00902	1.70418	3.51414	2.64234
GSR	0.0109307	3.04821	1.92297	1.96686	2.53409
GSS	1.07e-09	0.600574	1.82848	1.40827	1.29613
GSTA1	3.85e-06	1.39477	2.28387	2.29627	2.51315
GSTA2	2.17e-06	1.33245	2.25519	2.24848	2.45663
GSTA3	1.42e-35	1.96993	0.213623	2.28673	2.44969
GSTM1	1.75e-08	1.32645	0.962763	0.874818	0.928759
GSTM2	6.01e-07	1.23385	0.9128	0.847761	0.908256
GSTM4	2.42e-08	1.32645	0.956812	0.874818	0.926479
GSTP1	7e-05	3.37971	10.6743	10.0668	9.99995
GTF3C1	0.0363493	0.000614987	0.040802	0.0264593	0.0356366
GTF3C2	0.00395084	0.0153004	0.00198991	1e-05	0.00902503
GTF3C3	0.0188454	0.0139929	9.15413e-05	1e-05	0.000665046
GUCY1B1	4.67e-21	0.00857493	0.0382809	1.86745	0.0315474
GUSB	8.74e-07	1.68788	2.98729	3.51388	2.56598
GYS1	1.14e-06	1.19845	1.9266	1.79619	1.09499
GZMM	0.00084513	0.170114	0.138695	0.139054	0.131069
H1-1	2.97e-30	0.131802	2.14391	0.437434	2.24762
H1-2	2.5e-33	0.116182	0.791511	0.34346	1.9103
H1-3	7.52e-34	0.116182	0.842248	0.336489	1.94408
H1-4	4.64e-12	1.99624	0.841266	2.20271	1.95756
H2BC12	0.00345522	0.317573	0.150238	0.238447	0.150183
H2BC13	0.00345522	0.317573	0.150238	0.238447	0.150183
H1-5	7.33e-24	0.313489	1.62226	1.16339	2.08552
H2BC15	0.00345522	0.317573	0.150238	0.238447	0.150183
H2BC18	0.00345522	0.317573	0.150238	0.238447	0.150183
H2BC4	0.00345522	0.317573	0.150238	0.238447	0.150183
H2BC5	0.00345522	0.317573	0.150238	0.238447	0.150183
H2BC9	0.00345522	0.317573	0.150238	0.238447	0.150183
H1-6	4.83e-29	0.146446	2.1949	0.486037	2.30789
H3C1	4.13e-12	11.7552	7.05811	4.62263	7.21501
H3C15	0.00018372	11.8811	6.89752	6.34465	7.28492
H4C1	0.0441394	7.70944	7.0829	4.04341	8.06114
H2BC1	1.32e-29	0.255748	0.0337436	2.2161	0.321057
H2BC14	0.00345522	0.317573	0.150238	0.238447	0.150183
H2BU1	0.0497361	0.31327	0.493089	0.180812	0.480324
H3-4	7.52e-12	11.8228	6.94764	4.60699	7.26898
H6PD	2.42e-05	2.70303	1.80795	3.50185	2.22946
HAAO	1.41e-22	0.688326	0.521984	1.74044	2.05366
HADH	9.26e-08	2.44229	2.22871	1.79908	3.34573
HADHA	0.0376457	0.848928	1.16558	1.2181	1.27129
HADHB	3.26e-17	2.57737	2.74816	2.04479	1.26192
HAGH	8.93e-21	0.343131	2.66893	0.530473	2.35601
HAPLN3	0.0232608	0.0619777	0.327096	0.564713	0.302651
HAPLN4	0.00784626	0.00204898	0.0164899	0.0105913	0.0307477
HARS1	2.02e-14	0.200843	0.415439	3.2589	1.29999
HARS2	0.024617	1.85254	2.06501	1.88894	1.63303
HAX1	8.46e-29	2.81228	0.754494	0.858799	2.26109
HDAC8	0.0356285	0.0109696	0.0188916	1e-05	0.000155922
HCK	4.62e-37	0.207865	2.27523	2.35668	0.519926
HCLS1	7.9e-27	4.68134	2.81946	5.55986	3.50593
HDAC1	0.00038771	1.94183	1.75026	0.0751472	1.62951
HDAC2	1.21e-20	1.79613	2.03831	1.70131	0.615479
HDAC6	0.00010105	0.180558	0.885638	0.850947	1.23581
HDGF	2.48e-06	6.95057	5.80746	5.99759	5.39565
HDGFL2	2.7e-37	2.34309	0.310531	0.0921143	0.276472
HDGFL3	0.0310278	5.63302	4.41852	3.69747	3.95171
HDHD3	0.0296443	2.44238	2.7807	2.36966	2.72536
HEATR1	1.32e-06	0.0112772	0.052749	0.0255499	0.471664
HEATR5A	0.00248481	1e-05	1e-05	0.00387126	1e-05
HEBP2	4.49e-20	5.64959	38.1729	33.7707	29.4192
HES7	0.0168324	35.2601	39.7457	41.3963	34.4138
HEPACAM	1.67e-15	0.43716	0.321606	2.3863	0.540027
HEPH	1.16e-28	1.61584	0.0279837	0.0302461	0.903728
HERC4	1.33e-10	0.79585	2.24254	3.26642	2.50839
HEXA	6.29e-18	0.091143	0.38591	0.357576	0.356504
HGD	0.00043093	0.170296	0.173164	0.0906748	0.700271
HGFAC	0.00094361	2.31645	5.1493	5.61068	4.82403
HGH1	1.32e-25	0.66245	10.8141	10.5462	7.38787
HID1	0.00530615	0.0595406	0.0745413	0.070642	0.124178
HIP1R	5.21e-05	0.00690686	0.0949781	0.162439	0.32397
HK2	0.0155518	2.1586	1.95843	0.944903	1.75312
HK3	3.58e-24	0.104799	2.04717	1.54857	1.88121
HKDC1	9.48e-13	0.0375136	0.114505	0.0469931	0.921898
HLA-A	2.28e-05	0.540794	0.443468	1.62144	0.822184
HLA-B	0.0002069	0.140845	0.274397	1.48957	0.324484
HLA-C	2.98e-05	1.61413	1.87711	1.74291	1.03213
HLA-DQB1	0.0143166	0.490655	0.169261	1e-05	0.196254
HLA-E	0.0212066	1.53455	2.00222	1.70439	1.21481
HLA-G	1.96e-25	1.73416	0.0189146	0.00915279	1.16829
HLA-H	0.00023359	1.54255	1.65051	1.61475	0.699254
HMGCLL1	0.0370165	0.123288	0.489683	0.159132	0.0108729
HMGB1	0.0420371	3.48786	2.53445	2.41911	2.80448
HMGB2	0.00722814	0.159439	0.16678	0.129413	0.806893
HMGB3	1.04e-26	0.495991	2.54838	1.91004	0.83337
HMMR	0.00248481	1e-05	1e-05	0.0029379	1e-05
HMOX1	0.00103113	1.27112	1.80744	7.80841	2.29494
HMOX2	7.15e-11	0.964804	0.571657	1.67784	0.790761
HNRNPA0	1.01e-15	1.06547	3.07989	1.71945	1.23383
HNRNPA1L2	2.71e-34	1.91565	0.0989848	0.0882885	0.0968173
HNRNPA2B1	0.00013457	1.26233	2.09559	2.08053	2.59802
HNRNPA3	7.98e-21	1.92983	0.177444	1.83507	1.22953
HNRNPAB	0.00027806	1.50746	1.54416	1.78051	1.86892
HNRNPD	3.09e-28	2.14102	2.98511	0.164399	0.684217
HNRNPDL	0.00181485	1.70055	1.01037	1.3808	1.40057
HNRNPF	1.87e-05	0.577844	2.33697	3.505	1.83338
HNRNPH1	9.74e-09	0.195787	0.634619	0.311206	0.565476
HNRNPH2	0.00051917	0.244636	0.393895	0.330303	0.372378
HNRNPH3	1.95e-12	0.518101	2.08604	1.99161	1.65282
HNRNPK	5.88e-08	1.9609	3.39094	2.52829	3.28006
HNRNPM	3.56e-11	0.254836	1.83328	0.189855	1.51563
HNRNPR	1.01e-12	1.3382	2.12043	0.294351	1.65914
HNRNPU	0.0237089	0.550019	1.41988	0.851937	1.27617
HNRNPUL1	0.00068759	0.578592	1.11156	0.830686	0.869254
HOMER3	0.00057379	0.475007	0.657964	0.668035	0.653086
HOPX	0.0165629	1e-05	0.0456798	1e-05	1e-05
HPCAL1	0.0345102	0.190412	0.172965	0.609209	0.870568
HPD	8.1e-05	2.27721	2.57187	2.29372	2.03989
HPGD	0.0409175	0.0815421	0.139908	1e-05	0.185368
HPR	0.0257749	189.239	203.725	195.826	247.376
HPRT1	1.42e-17	1.78021	6.72591	5.03221	6.08102
HRAS	4.88e-16	0.876076	3.01214	2.03595	2.8452
HRNR	0.00185458	0.237576	0.134994	0.175907	0.234439
HSD11B1	0.0230186	0.00960686	1e-05	1e-05	1e-05
HSD17B10	9.31e-30	2.20274	0.229092	0.121619	0.396164
HSD17B11	0.0191839	1.93513	2.81326	2.70754	2.30547
HSD17B4	1.09e-05	1.60647	2.00199	0.511704	1.89938
HSF1	0.0226743	0.0162522	0.00238318	0.0249551	0.0153618
HSF2	0.00248481	1e-05	1e-05	0.00384343	1e-05
HSF4	0.00248481	1e-05	1e-05	0.00334873	1e-05
HSP90AA2P	1.12e-38	1.95668	0.185856	1.84794	0.151542
HSP90AA4P	0.00498512	0.0412187	0.0953439	0.0482593	0.45491
HSP90AA5P	8.07e-11	1.75085	1.69559	0.0256333	1.67241
HSP90AB4P	0.0102236	0.159772	0.234203	0.233062	0.218568
HSP90B2P	5.73e-10	6.48112	5.52483	5.3957	3.71463
HSPA12A	0.0003451	0.038581	0.0920343	0.0712251	0.610393
HSPA12B	6.47e-21	3.09679	0.604059	0.465149	2.10838
HSPA4	0.0362385	0.531196	0.418859	0.397213	0.970581
HSPA7	0.00091111	1.53085	0.166011	1.69166	0.793205
HSPA9	0.00993986	0.586173	0.454744	0.444883	0.438932
HSPB11	1.35e-21	3.05925	1.35109	1.03799	2.25845
HSPB7	0.0043378	0.127294	1e-05	0.111686	0.20662
HSPD1	3.37e-09	5.98026	26.3568	13.1629	20.8133
HSPH1	0.0181166	1.53607	1.76712	1.59316	2.12162
HTRA1	7.43e-13	0.504075	1.16215	1.14679	1.46863
HTT	2.81e-06	0.0544249	0.0477253	0.0929222	0.585147
HYAL2	0.00494353	1e-05	0.0027763	0.0214916	0.00146143
HYPK	1.29e-06	1.55621	0.701406	0.537176	1.45142
IAH1	4.53e-16	0.110044	0.226184	1.85103	0.11374
IARS2	9.65e-05	0.351151	0.390392	1.72334	0.882312
IBA57	1.17e-16	0.00451634	0.069828	1.72955	0.678395
ICAM1	0.0235028	0.279093	0.341708	0.433739	0.329826
ICAM2	5.77e-21	0.330887	0.765605	1.82313	1.07564
ICOSLG	1.48e-29	1.89118	0.171523	1.7033	1.86662
IDE	3.85e-27	1.85616	0.0779406	1.80143	0.673092
IDH1	0.0005958	0.426834	0.352539	0.210486	0.371637
IDH2	6.86e-12	0.0133435	0.0761113	0.101551	2.06498
IDH3B	0.00444818	0.0377338	0.11535	0.0380662	0.267602
IDH3G	1.02e-06	25.7578	19.3683	11.0486	16.8247
IFI16	7.64e-33	1.87688	0.123046	0.0724595	0.0698982
IFIT1	1.4e-22	2.01688	0.270615	2.072	1.62245
IGBP1	0.00227746	2.22834	2.83471	2.69751	2.97631
IGFBP1	0.00248481	1e-05	1e-05	0.0270199	1e-05
IGF2BP1	4.56e-15	1.38294	1.76874	4.55926	1.64701
IGF2R	9.13e-07	1.30361	0.85621	1.18298	0.850837
IGFALS	5.08e-07	27.8629	25.5731	24.9381	22.8918
IGFBP2	9e-27	6.22765	0.742336	3.87683	2.55594
IGFBP3	5.58e-11	3.71342	2.07055	1.60125	1.77475
IGFBP6	1.74e-07	1.43609	3.18179	3.82663	4.18266
IGFBP7	1.26e-30	0.360597	2.90664	0.70038	2.39422
IGHD	0.0459824	8.73723	8.91622	6.54359	7.80191
IGHV1-18	8.38e-06	31.796	26.0918	27.2773	24.97
IGHV2-5	0.0257604	3.51185	4.35644	3.92584	4.66996
IGHV1-69-2	0.00062357	3.89215	2.5411	2.65003	2.8008
IGHV1-8	0.0216678	7.44658	6.04077	6.0536	4.88733
IGHV3-30	0.00795922	46.5926	44.465	41.2491	40.1315
IGHV3-30-3	0.00795922	46.5926	44.465	41.2491	40.1311
IGHV3-30-5	0.00795922	46.5926	44.465	41.2491	40.1315
IGHV3-11	0.0118099	26.6801	29.319	28.7183	25.9059
IGHV3-43D	0.0115534	26.626	29.1208	28.5448	25.7656
IGHV3-13	0.0246485	31.9512	34.9449	34.2538	30.9187
IGHV3-20	0.0118099	26.6801	29.319	28.7183	25.9059
IGHV3-21	0.0149601	26.6801	29.6123	28.7183	26.2052
IGHV3-33	0.00946825	45.994	44.0147	40.8008	39.7475
IGHV3-43	0.0115534	26.626	29.1208	28.5448	25.7656
IGHV3-48	0.0287035	32.52	35.1828	34.4619	31.1283
IGHV3-53	0.0400222	47.7857	45.2443	40.9932	40.3848
IGHV3-64	0.00084957	11.7363	9.07103	8.29609	8.89494
IGHV3-7	0.00031186	215.899	198.425	204.483	181.031
IGHV3-73	0.0383769	53.3745	48.8091	50.5525	48.1817
IGHV3-9	0.0362721	30.2827	35.4157	34.7061	32.0231
IGHV4-4	0.0411719	15.5807	14.1707	8.46762	14.8506
IGKV1-33	0.028877	58.9774	42.3544	46.1694	44.1281
IGHV7-4-1	0.00013234	4.43273	3.91924	4.44639	3.38644
IGKV1D-33	0.028877	58.9774	42.3544	46.1694	44.1281
IGKV1D-8	0.0176575	6.63865	4.91882	5.23287	5.57529
IGKV2D-30	0.00049068	45.7581	41.2017	40.7756	39.0064
IGKV2D-40	0.00574716	49.2391	45.7318	45.5808	46.6412
IGKV2-28	0.0016707	58.666	53.595	54.0426	54.5771
IGKV3-7	8.28e-06	187.486	151.549	158.668	154.448
IGKV2-30	0.0220795	78.1741	100.201	122.163	109.171
IGKV2-40	0.00574716	49.2391	45.7318	45.5808	46.6412
IGKV2D-28	0.0016707	58.666	53.595	54.0426	54.5771
IGKV4-1	3.49e-06	205.589	261.914	285.329	271.091
IGKV6D-21	0.0478857	4.80081	3.23393	2.94053	3.31645
IGLON5	4.36e-24	2.80536	0.342977	2.44036	1.74518
IGLV1-36	0.00560827	19.0764	13.6368	11.8333	10.5503
IGLV2-23	9.28e-19	3.53369	1.44602	0.0452171	1.9452
IGLV3-1	1.94e-07	21.4113	26.0602	27.2078	30.4344
IGLV3-10	2.26e-09	26.1357	35.1206	37.9983	37.6426
IGLV3-19	0.038643	92.8615	64.2114	74.7222	65.773
IGLV3-25	0.00666707	32.206	28.0412	28.3018	30.697
IGLV3-27	0.0176219	27.9253	23.7195	24.1849	26.2603
IGLV5-45	3.54e-25	11.7271	3.34329	2.94965	2.33596
IGLV7-43	0.00212845	42.2213	32.2591	32.1926	29.7375
IGLV7-46	0.00212845	42.2213	32.2591	32.1926	29.7375
IGSF8	6.49e-06	0.0667914	0.0544471	0.0164883	0.569669
IK	0.0363826	0.132572	0.032148	0.0673558	0.0372316
IL18BP	0.0153312	0.0110204	0.00283503	1e-05	0.00280795
IKBKB	2.13e-23	0.106085	2.07958	1.96991	1.8244
IL1RAP	6.24e-09	1.76359	0.705303	0.280281	0.594605
IL6ST	3.06e-18	1.55949	0.523183	0.535782	0.495929
ILF3	8.51e-08	3.59997	0.816317	0.469189	1.97544
ILK	7.2e-27	0.189865	2.17148	0.0982051	1.75385
IMPAD1	0.0104584	0.0993003	0.480292	0.281193	0.507736
ILVBL	2.05e-25	0.130558	0.418972	1.70145	1.18767
IMMT	2.29e-14	0.367905	1.99401	0.141978	1.2598
INA	6e-09	6.50883	5.17769	4.96233	5.0156
INF2	6.8e-07	1.72154	1.7488	1.63283	0.834538
INPP5D	4.98e-22	2.27006	0.398105	0.162516	0.808728
INPP5K	0.00039356	0.723467	0.432003	0.24919	0.486443
INTS10	1.23e-10	2.38932	1.61518	2.34338	2.06418
INTS13	0.0105934	1e-05	1e-05	1e-05	0.00923687
INTS3	3.37e-32	1.96253	0.124197	0.167157	0.303307
IPO5	0.00086413	0.507902	0.688664	0.829098	1.20765
IPO7	3.53e-06	0.538076	1.11152	1.37302	1.28012
IPO9	9.2e-08	0.256245	1.93762	1.67217	1.48266
IQGAP1	0.00432715	1.23667	1.83917	2.12332	1.94447
IRF2BP1	0.00096167	1e-05	0.0109575	1e-05	0.00367621
IRF2BP2	0.0489063	0.0287932	0.0314339	1e-05	0.167747
IRF4	0.00854597	0.0384396	0.0029959	0.012935	0.00602111
ISCU	0.00242781	0.325614	0.00385804	1e-05	1e-05
ISG15	0.0126561	0.403357	0.287237	0.60841	0.0950503
ISLR	1.34e-15	1.99361	1.09834	0.710116	1.91511
ISOC1	1.22e-12	0.061314	0.245914	0.392786	0.395299
ITGA1	1.16e-40	2.00067	0.0246747	0.00882267	0.113788
ITGA2	0.00056214	2.27691	1.6876	1.62524	2.0738
ITGA3	0.0120541	1.67577	1.81924	1.60036	1.3331
ITGA6	0.00280612	0.840086	0.599162	0.89839	0.64508
ITGAM	9.78e-06	1.56115	0.232722	0.309346	0.253914
ITGAV	7.85e-07	1.56945	2.15431	0.604105	1.85872
ITIH4	0.00438213	164.974	175.045	185.361	180.204
ITPKC	5.18e-32	0.00504113	0.0334004	1.90668	0.0671496
ITPR1	6.7e-36	1.82325	1.82842	1.47946	0.228788
ITPR2	0.029453	0.00314436	0.00182896	0.00261172	0.00112504
ITPR3	9.54e-23	0.51933	0.0669022	1.6783	0.584355
ITSN1	1.13e-15	0.0222911	0.0241717	1.82098	0.223557
JAK1	0.0328589	0.000770782	0.00110854	0.00747761	0.00472732
JAM2	0.00250126	0.101777	0.525514	0.00182431	0.140169
JUP	0.0111902	4.09559	4.04699	5.04022	4.51459
KANK2	1.62e-05	0.375193	0.384034	0.360629	0.286053
KANK4	0.00248481	1e-05	1e-05	0.00181597	1e-05
KARS1	2.06e-09	0.435863	0.887	1.73621	0.697327
KCTD6	0.0230186	0.0202773	1e-05	1e-05	1e-05
KDSR	0.00416025	1.9577	2.55649	2.18397	2.34447
KEAP1	2.41e-37	1.84947	0.0824092	0.175283	0.147998
KIAA0319L	0.0230186	0.0279813	1e-05	1e-05	1e-05
KIAA1217	2.07e-27	0.0309867	1.97387	1.61477	1.51651
KIF13B	5.76e-10	0.0328491	0.0467602	0.0521348	0.924779
KIF5A	1.61e-20	0.13298	1.79135	1.9747	1.41476
KIF5B	1.2e-05	1.08336	1.11994	0.671609	0.655426
KIF5C	1.53e-24	0.142345	0.709842	1.89852	1.4314
KIFBP	0.0424311	0.00373074	0.278919	0.324069	0.292621
KIT	2.75e-08	7.80928	5.44105	1.28891	6.606
KLC1	0.00696386	1.84745	1.78576	1.58012	1.12545
KLF8	0.00872605	0.000202312	0.000230332	4.58475e-05	0.000140167
KLC3	0.0230186	0.0847312	1e-05	1e-05	1e-05
KLC4	1.44e-12	0.0985894	0.150681	1.85867	0.690684
KLK10	1.32e-41	2.38832	0.285944	1e-05	0.23218
KLK11	0.00445291	0.0362374	0.298771	0.402809	0.0907151
KLK7	0.0007088	0.206567	0.168026	0.168851	0.158712
KLK12	0.00093547	0.262904	0.214171	0.214901	0.205133
KLK13	0.00084513	0.170114	0.138695	0.139054	0.131069
KLK15	0.00248481	1e-05	1e-05	0.0491499	1e-05
KLKB1	0.0065414	57.1677	45.5171	47.8796	37.8493
KPNA1	1.47e-10	1.8617	0.259858	0.319427	0.405042
KPNA5	4.94e-11	1.97295	0.244578	0.257755	0.366757
KPNA6	2.49e-10	1.97295	0.250047	0.257755	0.419524
KPNB1	0.0006595	0.373228	0.744136	0.966614	0.715904
KRAS	1.33e-38	3.13918	0.218246	0.122951	0.335544
KRI1	0.0100608	1e-05	0.00819943	0.0410902	0.000309184
KRT12	5e-17	0.0317645	0.0487371	1.83082	0.0469103
KRT19	0.00065938	2.86768	2.29748	1.37286	2.57283
KRT2	0.0174588	7.8797	7.1449	7.20644	8.25628
KRT20	0.0474357	10.5541	8.09723	8.94521	8.1115
KRT222	7.4e-13	0.0309222	0.0411576	1.82857	0.573054
KRT24	7.18e-23	1.58141	0.00955416	0.0234641	0.52856
KRT3	0.0129067	0.798925	0.83814	0.658516	0.807524
KRT31	7.96e-19	0.227739	0.051495	1.66096	0.566989
KRT32	1.98e-23	1.63073	0.0183328	1.80162	0.695655
KRT33B	1.71e-21	1.60578	0.0275821	1.66096	0.951673
KRT35	3.53e-27	1.62227	0.0109915	1.70598	0.508378
KRT36	0.00507809	1.52826	2.11495	1.59654	1.84626
KRT37	4.69e-24	1.63428	0.0180158	1.80071	0.712452
KRT38	7.48e-23	1.67194	0.0138641	0.0304143	0.532303
KRT4	0.00633183	6.77452	18.1506	13.4177	14.3558
KRT7	8.98e-05	0.91479	0.633189	0.590846	0.68475
KRT71	0.0456561	0.316949	0.607954	0.456405	0.546995
KRT73	2.47e-05	0.530965	1.13719	0.962815	1.28383
KRT74	0.0456561	0.316949	0.607954	0.456405	0.548281
KRT75	0.00887351	0.832181	0.797648	0.682459	0.720612
KRT76	0.00991831	0.727121	0.760929	0.602919	0.753535
KRT78	0.00129994	1.12766	2.08218	2.48461	2.16577
KRT80	4.19e-06	0.980961	0.756223	0.648283	0.7095
KRT84	0.00016256	0.635074	0.522041	0.469418	0.510623
KRT9	9.6e-05	36.3428	46.4948	47.4408	46.4824
KTN1	0.00015718	2.1657	2.10767	1.72774	1.38659
L1CAM	2.45e-06	1.9061	2.62291	2.65737	2.53528
LAMA2	0.019596	0.192711	0.211202	0.133935	0.172845
LAMA4	0.00164409	0.295266	0.235655	0.178207	0.22998
LAMC1	4.66e-06	3.89908	11.0806	0.634582	6.28834
LAMC2	1.09e-11	0.94255	2.46239	0.434564	2.02315
LAMP1	1.4e-35	0.332822	2.13845	1.9283	0.632623
LAMP2	0.00488386	0.131961	0.171732	0.107019	0.10997
LAMTOR2	1.89e-28	4.41149	1.12675	0.810068	0.705451
LAP3	1.34e-19	0.427341	3.81286	2.75576	2.6107
LARP1	7.28e-07	1.72294	0.93957	0.298675	0.762041
LARP7	5.62e-45	0.0698451	0.211147	0.448564	1.99971
LARS1	1.47e-12	1.6826	0.391963	1.83225	0.8478
LCAT	3.15e-05	5.03312	4.08596	3.88357	4.32747
LASP1	9.75e-12	1.8297	2.19967	0.0838678	1.63433
LCN1	3.54e-26	0.0532707	2.14093	0.712667	1.69721
LCN1P1	6.34e-29	0.0314369	2.14977	0.211891	1.52156
LBR	3.96e-30	0.413023	0.0432432	0.0430138	0.0504368
LCP1	0.0248071	14.163	11.798	15.0096	18.1217
LDB3	0.0281295	0.153816	1e-05	1e-05	0.0175291
LDHB	0.013685	3.77192	6.90134	4.5334	7.52456
LDLRAP1	0.00075733	0.0653975	0.15384	0.253486	0.456432
LEMD2	1.49e-05	1.4452	2.57989	2.56829	2.27291
LEPR	3.61e-18	0.0824719	0.0742539	1.85581	0.949465
LETMD1	8.21e-18	0.316928	0.332332	2.39278	0.407292
LGALS7	0.0232409	0.794865	0.20086	0.247219	0.187653
LGALS1	0.0290998	2.24333	2.12498	2.44429	1.63378
LGALS3	4.2e-12	1.92757	18.6481	0.363413	1.74579
LGALS4	0.00020866	4.47322	3.63844	2.92708	3.49392
LIMK1	0.00141848	0.00693973	1e-05	0.0481934	0.0011851
LIN7C	0.0393305	0.000882912	1e-05	0.0181291	0.064294
LIPF	4.03e-22	1.24726	2.483	0.246802	2.12796
LLGL1	0.040294	1e-05	0.03804	1e-05	0.0235868
LMAN1	2.65e-10	2.03924	2.18457	0.185606	2.017
LMAN2	0.0005181	2.1523	2.34917	0.897453	1.89067
LMAN2L	9.19e-05	0.320002	0.212182	0.206087	0.797111
LMNB1	0.0173587	1.52498	1.85952	2.03408	1.43577
LMNB2	2.78e-12	1.97386	2.16918	0.156981	1.69645
LMO7	1.67e-09	1.49554	0.149049	0.271801	0.567437
LNPEP	3.24e-26	0.0898462	0.145742	0.199313	1.4765
LNPK	1.68e-12	1.8219	2.29765	0.0662614	1.57978
LOC102724334	0.00345522	0.317573	0.150238	0.238447	0.150183
LOXL4	1.55e-24	0.189168	2.09973	0.870264	1.59422
LPCAT2	0.0493488	0.011421	0.0239653	0.0722737	0.0119568
LPCAT4	2.33e-11	5.54464	8.52409	8.0007	6.49691
LPP	3.05e-13	0.0596173	0.0914092	0.144313	1.01671
LRBA	0.00123793	1.59087	1.83992	1.66092	1.3437
LRCH1	0.0165135	1.08574	1.1276	3.65505	4.14161
LRCH2	0.0300662	1.0063	1.0451	3.38248	3.83804
LRP2	0.00058242	0.3101	0.204013	0.449394	1.16538
LRPPRC	0.0271845	1.82449	3.27692	3.44677	2.83201
LRRC32	0.0159013	1e-05	0.0126217	0.0221328	0.000864457
LRRC40	0.00142397	0.0196442	0.0562048	0.0261844	1.25052
LRRC47	5.35e-08	2.76697	2.752	0.798638	2.44602
LRRFIP1	1e-09	0.509079	0.27523	0.158299	1.5117
LRRK2	0.0297109	0.10861	0.492214	0.11964	0.318719
LSAMP	3.71e-12	1.01996	2.30664	2.27676	1.69483
LSM1	3.96e-21	0.417583	0.602764	0.535194	2.09784
LSM3	0.00015953	0.602742	0.306947	0.043575	0.76103
LSM4	0.0126758	0.126012	0.0918771	0.0963571	0.294681
LSR	5.8e-05	0.0247745	0.00698259	0.0470715	0.223933
LTBP4	8.51e-14	1.89066	1.58976	0.265451	0.268372
LY75	0.00297762	0.00724308	0.000817446	0.00165197	0.00256567
LUC7L3	0.00028211	1.79957	0.319093	1.73751	1.08841
LXN	3.56e-05	4.80455	4.7241	9.62822	5.99207
LYN	2.14e-39	0.100728	2.11528	0.114874	0.248828
LYZ	5e-06	2.7932	1.77769	1.63036	2.29544
MACC1	0.00248481	1e-05	1e-05	0.00556606	1e-05
MACF1	0.0448892	0.361659	0.474053	0.312061	0.430955
MAD2L2	0.00810801	4.13965	0.857636	1.15174	1.47714
MADCAM1	3.77e-06	0.0223981	0.032388	0.0335372	0.491036
MADD	0.0162498	0.000349329	0.0120707	1e-05	0.190471
MAG	0.00152772	0.096406	0.321876	0.345388	0.598735
MAN1A1	1.61e-06	0.223359	0.21691	0.195806	0.3352
MANBA	4.57e-06	0.691922	0.951802	1.3347	0.924359
MAOB	3.86e-19	1.74907	2.29075	1.03023	4.28051
MAP1A	0.00087748	3.06365	2.69411	2.81126	3.40554
MAP1S	2.96e-39	1.91235	0.102446	0.0197469	0.13668
MAP2	7.48e-22	0.0548376	1.81038	1.67725	1.62967
MAP2K2	3.52e-36	2.66125	0.610606	0.00494767	0.27007
MAP2K7	0.00408199	10.324	13.9605	13.276	13.7673
MAP3K20	0.0421296	0.137349	0.455415	0.231543	0.359223
MAP3K6	0.0232189	1e-05	0.0142233	0.00994375	1e-05
MAP4	5.09e-12	0.22631	0.658234	1.06958	1.20412
MAP4K4	4.25e-43	0.0779515	2.08902	0.0815634	0.10585
MAP7D1	2.35e-18	0.00763609	0.0436843	1.77697	0.203289
MAPK1	6.23e-10	0.682393	0.945388	1.55637	1.24241
MAPK3	3.46e-22	0.198234	1.93893	0.469956	1.30194
MAPRE1	8.29e-17	0.844302	3.94704	3.09461	3.86329
MAPRE2	9.83e-08	1.59181	2.16116	1.63864	1.24234
MASP1	0.0400627	1.82245	1.5225	1.88316	1.56358
MARK2	9.08e-08	1.44715	3.09879	4.39382	3.96779
MARK3	0.0243597	0.42573	0.542004	0.646452	0.361871
MASP2	4.72e-08	1.40128	1.33696	1.15241	1.19533
MAT1A	1.7e-15	0.0229151	0.0155954	1.77793	0.295877
MAT2A	1.72e-10	0.52333	2.24049	0.561486	1.98416
MATR3	6.21e-09	0.199669	1.03653	0.64159	1.25221
MAU2	0.0235704	1e-05	0.00484615	0.0174027	0.00469928
MAVS	4.18e-07	2.72269	2.00778	2.48222	2.24159
MBD2	0.0264633	0.0265221	0.0253934	0.0235865	0.228926
MBL2	0.0044294	4.71316	3.5759	3.86585	3.47286
MCAT	0.00011199	0.00772259	1e-05	0.0266537	0.000314904
MCCC1	4.58e-22	0.34953	1.95924	0.421655	1.71827
MCCC2	1.36e-05	2.23807	2.3652	2.34809	1.58995
MCF2L	0.00248481	1e-05	1e-05	0.005027	1e-05
MCM4	3.35e-25	0.0754714	1.95942	0.0344747	1.59
MCM5	0.00313683	1.65432	1.49959	2.27582	1.68394
MCM6	9.94e-17	0.346269	1.87408	0.822453	0.613059
MCM7	1.1e-18	1.74165	0.227244	0.025133	0.908851
MCTS1	2.97e-16	3.96952	1.16868	0.594347	2.535
MDH2	8.93e-06	5.2288	3.46764	1.90736	3.70603
MDK	0.0211231	0.025125	0.0182218	1e-05	0.00704494
MDN1	6.65e-27	0.216312	0.0499748	1.53057	1.52393
ME1	1.07e-25	0.0770409	1.72872	0.0583329	1.23106
MECP2	3.48e-25	0.0763384	2.12901	1.64492	1.0973
MED23	0.0144632	16.8073	19.5357	16.2812	16.7374
MED30	8.47e-06	34.0817	52.4546	52.2029	51.1359
MED8	9.82e-15	0.219251	0.695607	2.84807	0.806389
MEF2D	0.00899693	2.18629	2.33763	2.64022	1.78043
MEGF8	0.0186774	1.87414	2.08898	1.69211	1.6725
MERTK	4.63e-32	0.295497	0.351273	2.06352	1.99824
METTL18	0.0175245	4.23484	5.63889	5.62133	6.27373
METTL21A	0.00248481	1e-05	1e-05	0.0137477	1e-05
METTL5	0.00248481	1e-05	1e-05	0.0439448	1e-05
METTL16	0.00398731	0.00214252	1e-05	0.0129397	0.00194452
METTL17	0.00248481	1e-05	1e-05	0.0188333	1e-05
MFAP4	8.74e-28	1.57789	1.59975	3.96555	3.17198
MFGE8	3.14e-34	2.11123	0.293194	0.263005	2.14898
MFN2	2.36e-24	0.207474	2.14128	1.81118	1.76186
MGAT1	0.0146405	0.30393	0.265384	1e-05	0.173562
MGAT2	5.38e-07	2.14893	2.37723	2.2638	1.76391
MGLL	5.66e-07	0.229331	0.415801	0.457856	0.351497
MGST1	3.86e-15	0.431212	1.05426	1.59952	1.26694
MIA3	0.0356205	8.42969	10.4111	5.40113	8.89928
MICALL2	4.88e-33	0.716039	2.8139	2.12405	0.665843
MICU1	3.12e-08	2.17675	2.1238	2.08376	1.4408
MICU2	0.00693617	0.0550429	0.155214	0.450338	0.0732698
MIPEP	7.81e-24	17.4434	36.9552	51.3955	49.6266
MISP	6.62e-36	1.40245	0.173769	0.143868	0.205877
MKLN1	0.0351382	0.0135322	1e-05	0.0370994	1e-05
MLEC	0.0415502	0.115967	0.232744	0.00430519	0.180181
MLPH	3.89e-19	0.016106	0.0673076	1.83875	0.259999
MLYCD	0.00010781	0.0157034	0.00668924	0.0116509	0.00172952
MME	3.78e-12	0.346466	2.22617	1.07683	1.60969
MMP10	3.38e-44	2.0828	2.2406	0.453298	0.242911
MMP2	0.0157743	3.3895	4.98816	3.28916	4.13378
MMP28	0.0200379	1e-05	0.0021672	0.016983	0.00137587
MMP3	3.23e-20	2.38995	0.708168	0.0276291	1.10652
MMRN1	1.4e-14	1.58536	1.92269	0.107996	1.0394
MMRN2	1.39e-10	0.18113	0.118379	0.152835	1.04454
MMS19	3.88e-31	1.81922	0.211014	1.69832	2.01955
MOCS2	0.0450569	0.408482	0.00203979	0.00557251	0.554132
MOGS	2.67e-17	1.80657	2.18087	1.86752	0.893898
MOV10	2.64e-20	0.0554397	0.0708355	2.04226	0.101445
MPHOSPH8	0.00193463	2.58444	2.80378	3.20151	3.01926
MPST	6.57e-12	0.666829	0.8065	3.39688	1.44664
MPV17	0.00236626	0.536805	0.186423	0.335521	0.135202
MPZL2	9.83e-05	3.08399	3.4994	2.60405	2.9153
MRPL11	0.0455188	0.457919	0.0220262	1e-05	0.0610095
MRPL13	0.0452595	2.50662	2.70186	2.65146	2.45543
MRPL15	0.0126033	0.330041	0.615777	0.616941	0.674256
MRPL2	6.95e-15	3.63865	1.98137	4.18201	2.26646
MRPL22	0.0341461	0.0458462	0.0134708	1e-05	0.0353954
MRPL3	0.00032644	1e-05	0.0387035	0.0654052	1e-05
MRPL37	0.0466792	1.01336	0.100195	0.28171	0.207454
MRPL39	0.0395758	0.654093	0.0464248	1e-05	1e-05
MRPL49	1.3e-16	5.0461	1.1664	3.67882	2.56495
MRPL50	9.54e-12	2.18451	2.8166	2.67442	1.29668
MRPS15	6.49e-13	2.00844	2.23043	0.263591	1.40203
MRPS18A	0.00210496	10.072	31.489	18.5943	32.0355
MRPS25	0.00097675	0.59362	0.457857	0.411988	0.424928
MRPS31	3.34e-16	7.83027	5.19398	4.7878	3.85703
MRPS6	0.0464048	0.0425848	0.0759808	0.0141375	0.069749
MRPS9	1.24e-12	2.60271	2.58893	0.772528	1.47583
MSH2	0.00782628	3.41024	2.91005	2.72318	2.80445
MSH6	4.71e-32	1.71173	2.10856	1.4808	0.359657
MSI2	0.0316344	0.510364	1.3578	0.0528817	0.401261
MSL1	0.00071184	6.65757	6.52256	5.66822	6.27118
MSMO1	0.00248481	1e-05	1e-05	0.0202074	1e-05
MTA2	0.0164197	0.90982	1.15273	1.15617	1.27714
MTARC2	3.18e-27	0.107938	2.19414	2.01059	2.00995
MTFR1L	0.00010876	0.0275368	0.0518511	1e-05	0.352151
MTHFD1	0.00110908	0.733649	0.666856	0.557765	0.744565
MTM1	0.0331496	0.502505	1.01028	1.17313	1.94382
MTMR14	0.0491839	0.0151061	1e-05	1e-05	0.00516762
MTMR2	0.00921425	0.800225	0.366144	1e-05	0.817422
MTOR	2.51e-18	0.0854929	1.8887	0.0173071	0.958215
MTREX	6.52e-09	2.93655	1.84285	2.67175	2.68991
MTTP	8.43e-27	0.0997723	2.19216	1.65579	1.75908
MUC5AC	3.46e-14	0.0796129	0.0672832	1.63435	0.875423
MUC5B	2.47e-23	0.0274146	1.65777	1.39791	1.59647
MUC6	0.0205038	1.16315	1.15179	1.70879	1.48541
MVB12B	2.24e-22	2.38234	20.9236	16.6946	24.9092
MVD	1.29e-23	0.356976	1.77547	1.65402	1.49332
MVK	4.67e-07	0.216454	1e-05	0.0375283	0.0242898
MVP	3.78e-06	0.296332	1.54774	2.06427	1.26971
MXRA5	4.06e-06	1.87821	0.132104	0.115318	1.04735
MYBBP1A	7.45e-09	0.0206145	0.117345	0.0613317	0.834718
MYD88	0.0479487	0.0264084	0.13675	0.293669	0.322362
MYDGF	1.11e-20	0.51095	2.30055	1.65844	2.05689
MYL4	5e-10	6.97016	4.79406	7.55953	7.21966
MYLK	1.34e-11	1.53633	0.244648	1.52334	1.50742
MYO1A	0.0195468	4.38441	3.25181	3.91978	3.21188
MYO1C	0.00224266	0.782135	0.568599	0.915019	0.662198
MYO1D	2.08e-25	0.123143	2.72474	1.66123	0.82719
MYO1E	2.35e-23	2.00746	0.18317	0.0881645	1.44251
MYO1G	2.45e-28	0.0267339	0.104609	1.6345	1.45496
MYO5A	1.28e-15	0.167513	1.79557	0.0076199	0.850954
MYO5B	2.37e-10	0.0458897	1.63931	1.4686	0.954321
MYO6	2.85e-07	1.87344	1.8831	1.98248	1.16987
MYOF	0.0049098	0.294426	0.422479	0.336746	0.426901
MZB1	2.01e-19	2.19091	0.448059	0.35981	1.49353
N4BP2L1	0.00338324	0.0597576	0.0100537	1e-05	0.00333097
NAA50	0.033616	0.361771	0.120698	1e-05	0.253925
NACA	0.0478846	0.00906823	0.00108163	0.00094147	0.0155947
NACAD	1.21e-05	1e-05	0.00401832	0.0223487	0.00760531
NADK2	0.0238141	0.0138161	0.00343308	0.007741	0.00500648
NAE1	1.52e-06	2.73452	2.49931	0.89736	2.28146
NAGA	0.00068227	2.17526	2.99953	1.80217	2.04053
NAGK	0.00021543	1.50522	2.12004	1.88889	2.07896
NANS	1.75e-06	0.124992	0.240324	0.0341323	0.6876
NAP1L1	0.00458071	12.765	15.2901	15.1365	18.9204
NAP1L4	1.93e-38	3.10494	0.19528	2.01575	0.188327
NAPA	0.00601527	0.801404	1.6334	2.90114	0.894289
NAPB	0.0178173	0.0341823	0.02023	0.19366	0.000212825
NAPG	0.0325587	0.0106873	0.315985	0.612208	0.166165
NARS1	0.00160428	0.51968	1.67567	1.51426	1.33223
NARS2	7.46e-34	0.0714283	0.0683246	1.83659	1.65814
NAT10	0.0370236	0.0832216	0.252227	0.139981	0.164153
NAV1	0.0325659	0.0348252	0.00371842	1e-05	0.000385177
NBAS	4.13e-09	1.63995	2.30818	2.12807	1.56764
NCAM2	0.00012971	1.89175	2.15765	0.849461	1.66493
NCAN	3.2e-35	1.96804	0.131996	0.152446	0.163474
NCBP1	2.04e-11	2.0183	2.36869	2.34423	1.63394
NCF1C	2e-34	3.99405	0.538325	1.89362	0.422929
NCF1	8.84e-35	3.82059	0.49845	1.85358	0.402937
NCF1B	5e-35	3.74315	0.480648	1.83571	0.388871
NCKAP1	0.00070884	3.86192	5.25487	5.9151	4.14563
NCL	4.21e-05	4.96877	2.92583	3.24417	2.15556
NCOR1	9.91e-22	0.00834745	0.00794787	1.84857	0.0226524
ND1	3.78e-22	7.95646	1.12779	0.700265	2.68532
ND5	0.00248481	1e-05	1e-05	0.0436655	1e-05
NDRG1	1.1e-16	0.179319	0.558854	0.572051	0.87797
NDRG3	7.66e-21	0.326351	2.73481	0.836878	1.41771
NDUFA10	0.00032548	8.10698	6.26274	7.4743	6.77743
NDUFA3	0.00248481	1e-05	1e-05	2.83111	1e-05
NDUFA7	0.00248481	1e-05	1e-05	0.0610435	1e-05
NDUFA9	0.0007219	0.442132	0.641175	0.988954	1.38525
NDUFAF1	0.00248481	1e-05	1e-05	0.0289714	1e-05
NDUFAF3	2.76e-05	27.2182	36.2079	39.2188	36.5463
NDUFAF7	0.0273802	0.0232048	0.0357813	0.0363064	0.236688
NDUFB4	3.59e-07	0.855654	0.748408	0.641294	1.74397
NDUFB6	5.9e-09	2.01142	3.25089	3.3796	3.40321
NDUFB8	0.0337575	0.0678589	0.135926	1e-05	0.0834783
NDUFS1	2.81e-18	1.10876	0.408929	1.94563	0.361065
NDUFS2	1.74e-05	0.6999	2.01418	1.53716	1.64444
NDUFS3	4.51e-44	0.186966	2.19161	0.0781406	0.126827
NDUFS8	0.0382263	0.0430979	0.0210032	0.00704495	0.187424
NEGR1	0.00450807	3.14676	2.45988	2.52203	2.5596
NEIL2	0.0118612	0.0928417	1e-05	1e-05	0.00878874
NELFA	5.07e-20	0.22485	2.79637	2.64899	2.46017
NEO1	2.07e-25	0.028835	2.14765	1.58268	0.915137
NES	4.79e-28	0.0449233	2.99769	3.09547	1.25179
NF2	0.0116123	0.00604908	0.00852002	1e-05	1e-05
NFATC2IP	0.0369604	0.0272675	0.089548	1e-05	0.0494459
NFKB1	6.42e-12	2.53414	3.37701	0.919191	2.15142
NFYA	2.04e-20	0.498136	2.40686	2.14906	2.20967
NGLY1	5.35e-25	0.00804453	0.0824054	1.95426	0.105941
NIBAN1	5.55e-19	0.00336146	0.1347	1.99828	0.426672
NIBAN2	5.84e-23	1.05312	0.26442	0.513287	1.51833
NID2	0.0137591	7.58751	8.88174	7.73948	7.3579
NIFK	0.0215554	0.00387608	0.120861	0.0522368	0.198129
NIPSNAP1	0.0232011	0.0119681	0.0943598	0.0645079	0.194969
NIPSNAP3A	0.00052058	1.18523	1.04955	2.01146	1.19552
NKRF	0.00030938	1e-05	0.00832607	0.103452	1e-05
NLGN3	0.0312113	1e-05	0.237963	1e-05	0.230329
NME2	2.84e-17	0.07589	0.513644	2.02993	0.448157
NME1	0.00206299	9.54103	7.84191	7.24701	9.54968
NME2P1	0.0275014	0.0264522	0.0839073	0.138282	0.0530462
NMRAL1	0.00896175	2.63975	2.64776	2.3559	2.22066
NMT1	1.36e-11	1.89134	2.02871	0.0302952	2.0615
NMT2	2.04e-16	1.93765	2.01142	0.0190518	1.20455
NNMT	6.77e-05	2.17504	3.12228	3.57423	2.93168
NNT	0.0284957	1.42088	1.31333	1.21946	1.32533
NOL3	2.12e-10	0.18913	0.453838	0.372559	1.30743
NONO	0.0458668	0.978847	2.35865	6.20903	2.5788
NOP14	7.73e-13	0.0179338	0.0474139	0.0389913	0.942114
NOP16	0.0018911	0.397661	0.047993	0.0853542	0.0983198
NOP58	1.16e-13	0.654202	2.05953	2.15246	1.2975
NPEPPS	7.15e-05	1.9029	1.85735	1.8074	0.981752
NPM1	7.43e-05	3.79284	4.41425	6.53313	5.31142
NQO2	4.08e-05	0.379995	0.508176	0.479683	0.610715
NRCAM	4.1e-29	0.0921464	2.72293	1.0211	2.33542
NRIP2	0.0261941	1e-05	0.113244	0.0468131	0.146091
NSDHL	1.49e-19	2.40758	0.307393	2.63702	1.50816
NSF	2.04e-05	1.70585	2.56228	2.15681	2.96703
NSFL1C	1.03e-09	2.0629	2.0541	0.570177	0.99722
NSUN2	0.0191707	2.61921	3.35523	3.9969	3.7154
NT5E	1.31e-24	0.129443	1.96733	0.0991059	0.99823
NTM	0.00237118	0.626808	0.069018	0.00412189	0.0842954
NUBPL	0.0444727	4.13812	19.6705	15.3946	9.90866
NUCB1	9.96e-09	1.90208	0.575379	0.418574	0.516759
NUDCD2	4.52e-26	0.199916	2.16831	0.139747	1.01557
NUDCD3	0.00258818	4.08662	5.16793	6.38236	5.89442
NUF2	0.0230186	0.0295749	1e-05	1e-05	1e-05
NUDT5	2.05e-15	0.19233	0.257492	2.291	0.880535
NUFIP2	2.85e-46	2.39572	0.13317	0.0785194	0.0691432
NUMA1	0.00036865	0.706751	0.684199	1.00457	0.888864
NUP107	4.61e-24	0.220193	0.166645	0.136562	1.46911
NUP133	0.0199876	0.392131	0.47814	0.42109	0.477622
NUP160	0.00062696	1.5481	1.71464	0.19317	1.23895
NUP205	0.00019068	1.90343	0.764576	0.686888	1.36872
NUP210	0.00034671	0.0162447	0.120313	0.0867345	0.409017
NUP93	5.11e-33	1.71629	0.107283	1.89734	1.98588
NXF1	0.00426026	0.016564	10.2648	11.0474	3.89505
OAF	4.43e-15	0.217484	0.144406	2.84866	0.705049
OAS2	6.41e-22	0.131924	0.161577	1.98012	0.16181
OAS3	6.27e-38	1.69557	0.0617667	0.0114727	0.0431905
OAT	0.042173	0.0179263	0.0231795	0.0723043	0.0289525
OCLN	0.0166965	0.0424522	0.0202519	0.0060222	0.227184
OGDH	0.00016212	0.868017	1.56242	1.72654	1.57997
OGDHL	0.0330922	0.00354231	0.00523819	0.000949817	0.0195494
OGT	0.0223723	0.0528097	0.0562403	0.427583	0.305648
OIT3	0.0491573	0.0173567	0.702891	1.86791	0.155719
OLFM1	0.014728	1.17253	0.970648	0.812376	0.944787
OLFM4	4.41e-08	13.2348	5.04037	3.13205	3.1443
OMD	5.46e-15	0.275968	0.167385	1.77026	1.11814
OPA1	1.06e-06	0.4688	1.91683	1.73082	1.51359
OPCML	0.0428693	0.250839	0.206029	0.0800368	0.138484
OPLAH	1.45e-12	0.00992151	0.0119884	0.0990145	0.293846
ORC3	0.0295567	1.063	0.760185	0.629092	0.24917
ORC5	0.0486799	0.0249834	0.0284219	1e-05	0.00263933
OS9	0.0128972	0.00613217	0.00927662	0.0198738	0.0199889
OSBP	4.03e-38	2.29197	0.372342	2.11836	0.269604
OSBPL10	0.0342562	1e-05	0.00717046	0.0250702	0.000226043
OSBPL3	0.005458	0.0207882	0.0290381	0.0159787	0.228983
OTUB1	0.00074685	1.98797	4.45673	2.0373	3.11861
OXCT1	6.49e-10	2.9353	2.33393	0.319852	2.05451
OXLD1	0.00581363	2.58687	0.419241	1e-05	0.676685
OXSR1	2.52e-27	0.0893608	0.236213	0.0695075	1.39799
P2RX4	0.00248481	1e-05	1e-05	0.00520331	1e-05
P4HA1	0.00161477	0.0263583	0.077327	0.0550349	0.368574
P4HA2	0.00495912	2.1671	2.75624	2.86353	2.01113
P4HB	0.0261686	19.3959	101.442	89.8482	101.321
PABPC1	4.23e-30	0.058308	2.0679	0.0147612	1.73803
PABPC4	3.49e-22	0.0682964	2.11849	1.55483	1.44468
PACS2	0.00528688	0.0451772	1e-05	1e-05	0.00185064
PACSIN2	5.39e-38	1.6979	2.01687	1.90404	0.293029
PAFAH1B1	4.94e-23	0.067611	0.195301	2.19036	0.188769
PAICS	0.0318204	3.32113	4.16834	2.31863	2.31446
PAK2	3.53e-06	0.586633	2.16428	1.86557	1.28221
PALLD	0.00065439	2.27556	4.17271	2.67514	3.04918
PALM	1.66e-16	2.13269	2.27249	0.0132535	1.15153
PAPSS2	5.52e-24	1.86892	0.138397	1.60627	1.50705
PARD6B	4.67e-05	1.597	1.69439	1.70596	1.96912
PARG	2.12e-33	0.0297629	0.0286824	0.0752301	1.48746
PARK7	7.58e-05	5.98696	14.0548	10.1944	16.7709
PARP14	0.0349862	1.96916	1.90597	2.14725	1.47549
PARS2	1.24e-40	0.333429	2.07917	1.97296	0.212705
PBDC1	0.00224077	0.0926779	0.0176082	0.0826857	0.0477716
PCBP2	9.96e-12	2.81411	7.56118	5.81914	7.88544
PCBP3	7.65e-27	0.0397365	0.01879	1.93739	0.0271929
PCDH1	1.41e-36	0.062942	2.16072	1.69494	0.389719
PCDHGA11	5.17e-23	0.00422626	1.92121	1.43641	1.49968
PCDHGA12	5.04e-23	0.00401534	1.92093	1.43612	1.49948
PCDHGA3	5.04e-23	0.00357006	1.92035	1.4355	1.51404
PCDHGA4	5.04e-23	0.00411809	1.92107	1.43626	1.49964
PCDHGA5	5.04e-23	0.00357006	1.92035	1.4355	1.51404
PCDHGA6	5.04e-23	0.00341848	1.92015	1.43529	1.5138
PCDHGA1	5.17e-23	0.00434027	1.92136	1.43656	1.49056
PCDHGA10	5.04e-23	0.00401534	1.92093	1.43612	1.49948
PCDHGA9	5.04e-23	0.00365102	1.92045	1.43561	1.49977
PCDHGB1	1.49e-22	0.00401429	1.92057	1.43573	1.49905
PCDHGA2	5.04e-23	0.00349262	1.92025	1.43539	1.51392
PCDHGA7	5.04e-23	0.00401534	1.92093	1.43612	1.49948
PCDHGB4	5.04e-23	0.00411809	1.92107	1.43626	1.49964
PCDHGA8	5.04e-23	0.00401534	1.92093	1.43612	1.49948
PCDHGB6	5.04e-23	0.00341848	1.92015	1.43529	1.5138
PCDHGB2	1.49e-22	0.00420974	1.9208	1.43598	1.49933
PCDHGB3	5.04e-23	0.00334743	1.92006	1.43519	1.51369
PCDHGB5	1.49e-22	0.00392323	1.92045	1.43561	1.49977
PCDHGB7	5.04e-23	0.00349262	1.92025	1.43539	1.51392
PCDHGC3	5.12e-23	0.00327927	1.91997	1.4351	1.49906
PCDHGC4	5.04e-23	0.00349262	1.92025	1.43539	1.51392
PCDHGC5	5.04e-23	0.0039176	1.9208	1.43598	1.49933
PCGF2	0.00248481	1e-05	1e-05	0.0250063	1e-05
PCK2	2.52e-22	0.0561609	1.99227	1.84012	0.985691
PCNA	4.14e-08	1.90285	2.63882	2.18804	1.62257
PCOLCE	0.0308877	0.585037	0.476616	0.431775	0.627321
PCYT2	0.0473704	0.279718	0.347695	0.187918	0.559763
PDCD6IP	9.73e-06	0.647221	1.91134	1.99075	1.63685
PDE6D	0.015075	0.00954406	0.158115	1e-05	0.0238952
PDGFB	0.00085919	0.489228	0.150648	1e-05	0.146457
PDHA1	1.13e-21	2.56834	4.04118	4.24029	4.81237
PDHB	0.0347842	1.28463	1.50109	0.974017	1.27162
PDIA6	1.51e-37	2.18335	0.21531	0.17437	1.92327
PDK1	1.75e-42	8.94504	1.87134	0.381524	0.775155
PDK2	3.36e-47	9.96485	2.05802	0.193869	0.878297
PDK4	4.29e-49	10.5986	2.20573	0.20563	0.931917
PDLIM1	4.3e-05	2.39804	1.57537	1.93999	1.96738
PDPR	1.46e-05	2.06694	1.34785	1.18136	1.41731
PDS5A	1.2e-12	1.89247	0.350506	0.417537	1.43179
PDS5B	2.46e-23	0.0924774	2.37914	0.447257	1.31995
PDZK1IP1	1.12e-22	3.3939	1.39277	0.842557	3.69988
PDZD11	8.73e-26	8.89101	3.87259	7.39327	7.65642
PEA15	3.13e-05	1.95172	1.98617	1.05152	1.93245
PEBP1	0.00869199	30.7954	39.2713	37.7332	42.3245
PECAM1	1.03e-05	1.65432	0.318258	1.54194	0.94132
PEPD	0.013615	0.268473	0.346698	0.31497	0.326218
PES1	0.00647536	0.0356695	0.0110609	0.0117677	0.0125785
PEX1	9.54e-32	1.55422	0.11472	0.101147	0.0798032
PEX11B	1.66e-12	20.0326	11.9255	15.7103	20.4885
PF4	0.0118081	13.7481	14.6519	14.2244	14.232
PFAS	1.38e-21	0.158557	2.10879	1.65501	0.971999
PFDN5	0.0499057	0.08015	0.742328	0.0687083	0.384429
PFKFB2	3.78e-25	0.0806117	2.14344	0.113038	1.3061
PFKM	0.0239997	2.61534	3.06012	2.4597	3.41991
PGA3	0.00247825	0.0222907	1e-05	1e-05	1e-05
PGA4	0.00247825	0.0260042	1e-05	1e-05	1e-05
PGA5	0.00247825	0.0222907	1e-05	1e-05	1e-05
PFKP	0.0294864	0.661499	1.02431	0.623133	0.990541
PFN2	2.35e-09	2.17539	1.81351	2.27461	1.71919
PGAM2	4.91e-21	0.0704323	2.10151	1.47171	1.43183
PGD	0.0182538	0.74059	0.844836	1.15594	1.01594
PGGT1B	0.00025114	0.0237945	1e-05	1e-05	1e-05
PGK2	4.01e-15	0.135241	2.11851	1.81137	1.84155
PGLS	1.99e-24	0.123933	2.06882	0.0467421	1.49732
PGLYRP2	0.0211582	18.0854	21.7517	22.9455	23.5716
PGM1	0.00428642	1.8515	1.35786	0.933133	1.10778
PGM2	2.46e-06	2.35034	2.47332	1.59183	1.6931
PGM5	3.92e-08	2.0437	2.2709	0.971591	1.7168
PGPEP1	6.49e-12	3.12601	4.65023	1.53125	3.86029
PGRMC1	4.6e-10	4.14189	3.57975	6.07969	4.4971
PGRMC2	0.00126947	1.00384	0.98971	1.59106	1.12912
PHB	0.00060083	0.513223	0.686698	0.603886	0.641426
PHB2	6.69e-21	2.19854	2.33296	2.19195	0.864322
PHF1	0.00248481	1e-05	1e-05	0.00856784	1e-05
PHF8	0.0110434	0.014107	0.0848273	1e-05	0.0252459
PHLPP1	0.00248481	1e-05	1e-05	0.00781202	1e-05
PHPT1	3.02e-11	3.99474	0.648523	2.37738	0.808193
PI4K2A	0.00934735	0.0010395	0.0507954	0.00211733	0.0343472
PIEZO1	9.46e-18	0.0175478	0.0170574	1.68246	0.0129554
PIGG	0.0134881	1e-05	0.14211	0.0912778	0.235113
PIGK	0.00248481	1e-05	1e-05	0.055427	1e-05
PIGR	0.00348918	0.843592	2.15567	1.67033	2.96523
PIGS	2.25e-39	2.04488	0.211928	0.192419	0.223776
PIGU	0.0394291	0.584277	0.21214	0.244822	0.156585
PIGX	0.00248481	1e-05	1e-05	0.035292	1e-05
PIK3IP1	0.0107185	1.68033	1.74847	1.55059	1.77145
PIK3CB	0.0141784	0.00430485	0.0591875	0.0340589	0.230279
PIKFYVE	0.00167162	0.0121526	0.0404223	0.0143941	0.334793
PILRA	0.00248481	1e-05	1e-05	0.0206052	1e-05
PIP	4.11e-22	31.0085	9.1007	5.97473	5.49408
PIP4K2A	3.44e-25	0.057733	0.0908889	0.106094	1.34931
PIP4K2C	1.5e-18	0.197749	0.799521	0.578402	0.987452
PIP4P1	0.0166472	1e-05	0.115414	0.020176	0.0117945
PIPSL	0.0462791	0.00239174	0.00670252	0.00277997	0.0830068
PIR	0.0241823	0.047371	0.0175402	0.0077931	0.0193139
PITHD1	4.42e-12	1.94071	2.19265	0.281419	1.32702
PITPNB	0.0158125	0.306012	0.256985	0.236864	1.02214
PITRM1	7.62e-29	2.08325	0.0972488	0.159298	0.702218
PKIB	0.0105445	1e-05	1e-05	0.422511	0.0565736
PKN1	0.0308695	0.0230953	0.144599	0.058243	0.133289
PKN2	3.94e-14	0.0485209	0.0411818	1.61725	0.220606
PLA2G12B	0.00310419	0.00782894	0.00609734	0.0498515	1e-05
PKP2	1.54e-07	2.78222	2.81119	0.620947	2.46281
PKP3	2.41e-12	0.0498155	0.136219	0.0886125	1.07426
PLAC8	0.0265228	1e-05	0.561627	1e-05	0.107234
PLBD1	0.00211611	0.0727334	0.441627	0.0746555	0.619978
PLBD2	3.85e-08	0.335437	0.476655	0.38288	1.04078
PLCB4	4.57e-38	1.76267	0.0360017	0.0136577	1.87775
PLCD3	1.21e-46	1.82375	0.114299	0.0469424	0.141073
PLCD4	0.0360994	0.0090806	1e-05	0.0214585	1e-05
PLEK2	0.037674	1e-05	0.0149689	1e-05	0.0443812
PLEK	2.22e-11	1.94679	0.960559	1.90816	0.904204
PLEKHJ1	0.0298826	0.0347595	1e-05	0.0065839	0.00232597
PLIN2	1.44e-27	0.243106	2.16374	0.152798	0.743581
PLOD1	2.28e-28	0.0893881	2.47228	0.031569	1.67287
PLP2	8.63e-21	0.609762	3.03828	3.8328	2.33843
PLPP1	0.00248481	1e-05	1e-05	0.00955512	1e-05
PLSCR1	0.025746	0.191922	0.00401382	0.00854576	1e-05
PLTP	1.91e-07	15.7906	23.1256	17.7983	26.5694
PLXDC1	1.17e-11	1.84901	0.138725	0.0921952	0.260201
PLXNA1	0.0167995	0.00780511	0.00134243	0.00151575	0.0020194
PLXNA3	0.0206732	1e-05	0.000941623	0.00503284	0.000575862
PLXNA4	0.0116933	0.00719907	0.00903821	7.22219e-05	0.00329577
PLXNB1	2.69e-28	0.0123322	0.0762595	1.4589	1.36164
PML	6.02e-26	0.116885	2.27183	0.213981	1.72773
PMM2	0.0141929	0.972997	2.07951	0.481438	2.5479
PNLIP	0.00530986	1.90379	1.75897	1.88489	1.30106
PNLIPRP1	2.23e-33	2.20993	0.279852	0.0138132	0.142906
PNKP	1.31e-07	2.45573	2.98863	0.908947	4.63152
PNO1	1.24e-29	0.276134	8.37667	6.82967	7.43411
POF1B	5.59e-08	8.62909	21.9976	13.6135	22.4324
POLA1	0.00248481	1e-05	1e-05	0.354519	1e-05
POLE	0.0189247	0.0175901	1e-05	1e-05	0.00547304
POLG2	4.03e-60	1.94581	0.0101377	0.0305949	0.0135389
POLR1D	0.0230186	0.0185735	1e-05	1e-05	1e-05
POLR1E	5.94e-29	0.0288124	2.09062	0.0914184	1.06715
POLR2A	4.24e-27	0.0967454	0.7491	0.805131	1.63803
POLR2B	0.00307545	1.98123	2.3474	1.51399	1.73115
POLR2C	2.99e-36	3.41914	0.437777	0.160591	0.135444
POLR2I	0.0212966	1e-05	0.0371593	0.129224	0.0348951
POLR2L	4.07e-29	0.263116	12.4748	13.3893	12.6396
POLR3G	0.00248481	1e-05	1e-05	0.0452508	1e-05
POMGNT2	0.0140452	1.4425	1.32627	1.1189	1.38639
PON3	2.93e-07	4.03803	3.50502	3.20339	2.9183
POTEE	0.0162121	0.349825	0.48021	0.384047	0.427599
POTEF	0.00117288	0.294521	0.419894	0.364686	0.382752
POTEI	0.00364773	0.268928	0.452402	0.322325	0.357017
POTEJ	0.00210662	0.227943	0.390748	0.288407	0.319175
POTEKP	0.0011334	0.781598	1.35033	1.16593	1.07351
PPA1	9.55e-08	1.32447	2.4803	1.85145	2.12193
PPA2	4.99e-21	2.49278	0.893027	2.26066	2.17335
PPBP	0.00271644	58.5698	46.8717	51.5132	49.5795
PPIC	1.19e-23	0.0289991	0.248516	3.07975	0.194897
PPIE	2.24e-24	2.7398	18.9118	19.32	25.9428
PPIG	1.21e-43	1.90238	0.0588661	0.0356511	0.061563
PPIL3	2.58e-10	0.370596	1.42592	3.06372	1.99431
PPIP5K1	0.0230186	0.125853	1e-05	1e-05	1e-05
PPM1A	4.67e-07	30.5109	56.373	24.0791	44.051
PPM1B	0.00048494	0.162221	0.0171551	0.00517537	0.0252389
PPME1	0.0408242	0.263462	0.0856433	0.0446552	0.10387
PPP1CA	2.2e-10	0.311697	1.6199	0.279654	0.502638
PPP1CB	3.83e-28	1.99185	2.2561	1.67676	0.60358
PPP1CC	2.28e-07	0.574498	0.375199	0.385428	0.348366
PPP1R10	2.96e-15	1.20922	11.2355	3.18875	6.11581
PPP1R13L	6.42e-15	0.156267	0.196776	0.176956	1.27413
PPP2R1A	0.00057062	1.19395	1.37697	2.22963	1.25925
PPP2R1B	2.62e-19	0.672779	2.4035	2.50637	2.76279
PPP2R2A	5.68e-33	0.32423	2.22643	1.83069	0.478501
PPP2R5A	0.00171316	2.03301	2.20388	2.00337	1.57706
PPP2R5D	4.13e-26	0.0835235	2.44722	1.54512	2.1536
PPP3CA	3.64e-25	0.259219	1.89127	1.92033	1.66821
PPP3CB	1.75e-34	0.215187	2.06624	0.161165	1.65815
PPP3CC	0.0079234	0.0139282	0.0930211	0.138457	0.0226297
PPP4C	1.19e-05	3.82788	3.96197	4.00583	3.91914
PPP5C	2.42e-19	0.131217	1.80797	0.576071	1.32938
PPP6C	1.15e-23	2.12716	0.154108	0.220198	1.1095
PRAF2	0.0010577	8.54585	5.38307	5.15074	6.87853
PRDX2	0.0161042	8.31616	11.1668	9.09614	8.4054
PRDX3	1.05e-39	2.37223	0.466042	0.172126	0.759892
PRDX4	6.32e-08	6.75867	6.63587	5.95501	7.53141
PRDX5	6.05e-07	0.850073	1.86129	0.953161	0.825338
PREB	3.46e-35	0.0337593	0.124706	1.819	1.62413
PREP	2.87e-14	1.95115	0.302508	1.70767	1.25618
PRH1	9.09e-23	4.32335	0.848446	1.47249	2.16487
PRF1	0.00448263	0.00368415	0.00101761	0.0140147	0.000480669
PRG2	2.55e-23	0.0734005	0.0547101	1.69949	0.12537
PRG4	3.42e-07	0.749177	0.946949	0.871608	1.07852
PRKAA1	1.87e-06	1.81597	0.539462	0.70175	0.66804
PRKAB1	0.00657725	81.802	81.3828	67.3442	59.9922
PRKACA	5.67e-24	1.78533	0.112208	1.91618	1.32549
PRKACB	1.3e-30	1.6516	0.150616	0.590115	1.66668
PRKAG1	0.0333254	0.251174	0.468449	0.292232	0.177876
PRKAR1A	1.05e-16	0.0508743	0.0689173	2.01241	0.282166
PRKAR2A	1.16e-20	0.247695	2.30255	3.28936	1.62728
PRKCSH	3.25e-07	2.07471	1.3531	0.667075	0.701414
PRKRA	1.84e-24	2.57735	2.39782	0.772991	0.885122
PRMT1	0.00030455	2.025	2.47102	1.9721	2.12991
PRNP	5.98e-25	1.61292	0.0442433	1.38862	1.61081
PROCR	1.18e-30	0.160976	0.15391	0.0380216	1.55324
PRORP	0.00516015	0.0116316	0.00310104	0.00314505	0.000658822
PROS1	0.0244057	23.1291	20.76	21.8979	21.5016
PRPF19	9.22e-08	2.07127	1.72798	1.8099	2.60665
PRPF4	1.08e-17	0.226282	0.0871414	0.0305163	0.128718
PRPF40A	0.0413047	0.031082	0.00128159	1e-05	0.032882
PRPF40B	0.0327209	0.0139856	0.0021039	1e-05	0.00196621
PRPF6	5.73e-33	0.0722713	2.10801	0.0231352	2.02037
PRPF8	0.0363987	0.255665	0.192656	0.192307	0.245225
PRPH	1.21e-28	0.210116	0.421529	0.536134	2.08194
PRPSAP2	3.9e-30	0.16243	0.578268	1.98399	1.91518
PRUNE2	0.0207047	0.00991543	0.00199365	0.00314647	0.00161156
PSAP	0.00898069	0.580951	0.822051	0.299162	0.53742
PSEN1	7.05e-21	0.0831377	1.94253	1.78638	1.24251
PSIP1	2.81e-33	2.3409	0.338854	0.0814515	0.319969
PSMA1	8.14e-13	0.956145	2.41711	1.96766	3.80638
PSMA2	0.00017809	0.138892	1.27318	5.18244	1.43714
PSMA3	4.16e-17	2.11566	5.2779	5.25678	5.06417
PSMA4	5.09e-39	0.359678	2.25756	2.06243	0.424831
PSMA5	9.63e-17	0.098337	0.249292	1.89555	0.24366
PSMA6	4.87e-25	0.438097	2.33711	0.24909	1.2033
PSMB10	2.48e-10	1.55865	2.49758	2.54166	2.37259
PSMB3	5.58e-21	0.502658	0.685014	1.97579	1.64498
PSMB5	1.96e-28	0.0840559	0.0775449	0.0485947	1.54179
PSMB6	3.79e-18	3.05804	5.20275	5.335	2.20919
PSMB7	5.63e-37	2.32743	0.30358	0.332835	0.39506
PSMB9	6.33e-35	2.11528	0.105886	0.203849	0.311301
PSMC1	0.0231972	8.06083	10.543	7.34339	6.60581
PSMC2	1.18e-05	5.09051	3.44797	3.59924	4.37953
PSMC3	0.00063565	1.30027	1.42721	1.87126	1.9314
PSMC5	5.76e-07	1.25086	2.41942	1.57485	3.11932
PSMD1	3.27e-15	0.0372464	0.0271728	1.64391	0.209803
PSMD10	0.00015617	0.0468108	0.320079	0.182785	0.562998
PSMD12	7.81e-05	1.37344	0.65563	1.86652	0.932911
PSMD2	1.04e-14	1.95328	2.00914	0.0978683	1.11324
PSMD3	2.01e-20	2.57345	2.26134	2.82741	2.03092
PSMD4	4.64e-19	1.85675	2.13235	0.065076	1.07189
PSMD5	1.16e-25	0.0682193	1.90173	1.78025	1.92312
PSME2	4.44e-21	9.85744	3.44262	0.48867	5.78938
PSMF1	0.0315224	0.0560785	0.00465317	1e-05	0.0242049
PSMG4	5.19e-09	0.900004	2.11106	0.984489	1.29987
PTBP1	0.00817348	1.32447	2.2686	2.31338	2.53462
PTBP2	0.00284417	0.348691	0.493463	0.400892	0.983942
PTCD3	1.38e-25	1.80831	0.089848	0.0237511	0.559883
PTER	0.00151559	2.35229	3.01992	2.27979	2.66499
PTGES2	0.0390472	0.0591333	0.0394067	0.0258621	0.0243567
PTGES3	0.00326219	0.117885	0.0839834	0.119358	0.0125307
PTGFRN	1.53e-26	3.58051	12.5098	11.4588	21.6527
PTGIS	0.017683	1e-05	0.114929	0.0959926	0.105211
PTGR1	1.52e-23	0.173226	1.89953	0.727304	1.45524
PTGR2	1.1e-21	2.60382	0.298877	0.218512	1.18291
PTP4A1	0.0329021	0.0424075	0.107121	0.0983203	0.244802
PTP4A2	1.22e-26	0.289951	3.30222	0.856711	1.78219
PTPA	0.00125208	0.0622089	0.19561	0.0512963	0.555931
PTPN1	3.68e-11	1.5241	2.4608	3.14253	2.74365
PTPN11	4.46e-28	0.214615	0.793073	1.86195	1.85977
PTPN13	2.31e-18	1.10354	0.173623	0.15055	1.08236
PTPN6	2.13e-05	2.11381	2.53009	2.56001	2.0235
PTPRC	0.00011263	0.401429	1.29175	0.90556	1.32745
PTPRCAP	0.0230186	0.303214	1e-05	1e-05	1e-05
PTPRE	9.57e-16	0.778868	0.472826	0.42064	0.454999
PTPRG	0.0310259	0.238724	0.316544	0.382315	0.351066
PTPRS	7.31e-20	0.287139	2.43313	2.54692	1.96494
PTPRZ1	2.15e-30	1.54002	0.0618195	0.0482172	0.0710224
PTRH1	0.00745182	1e-05	0.0210946	0.26781	0.0501777
PUF60	2.41e-25	1.87162	0.235986	1.99768	0.852904
PUM1	0.0347454	0.00377454	0.162688	0.0438079	0.094767
PVR	2.23e-44	1.94351	0.0128176	0.0806963	0.0509696
PXN	0.00232178	1.8819	1.78445	0.598124	1.67505
PYCARD	1.24e-36	0.123755	2.16602	0.0326336	0.438074
PYGB	3.11e-05	0.245988	0.169517	0.209838	0.283465
PYGL	2.06e-07	0.526758	0.249729	0.379395	0.35823
QDPR	2.07e-16	2.34763	2.21176	0.167093	1.1888
QSOX1	0.0488256	4.6733	14.4072	6.14631	9.37498
RAB10	4.31e-17	8.81658	15.3214	11.0786	17.2225
RAB1A	4.61e-23	2.14511	2.23512	0.179218	0.877797
RAB1B	9.04e-09	1.81428	2.25451	0.633402	1.19041
RAB1C	4.11e-15	1.80604	2.11484	0.190707	0.923701
RAB22A	0.00819108	0.0940251	0.0812076	1e-05	1e-05
RAB24	0.0396417	17.8233	17.5526	26.6951	19.4247
RAB25	0.00621251	0.12307	0.0323832	0.0404941	0.041769
RAB27B	0.0090053	0.0606116	0.175463	0.0512386	0.327864
RAB2A	2.63e-11	0.527403	1.90791	0.331464	0.441549
RAB2B	3.26e-07	0.357485	1.82567	0.391594	1.3369
RAB32	5.13e-32	0.144947	0.213125	0.470134	1.61441
RAB34	0.0163786	0.216883	0.0121421	1e-05	0.0685065
RAB3GAP2	5.68e-20	0.0272925	0.0367683	1.88308	0.0780919
RAB5A	2.29e-17	2.55999	2.47796	0.215818	1.77961
RAB5B	1.66e-17	0.180346	0.30719	2.05265	0.15629
RAB5C	7.33e-21	2.03344	0.288773	1.85311	0.933065
RAB6C	1.92e-28	1.84439	0.0824274	1.72902	1.53432
RAB6D	1.01e-27	1.84951	0.106803	1.72902	1.52431
RAB7A	2.77e-11	2.30301	2.2597	0.0736047	1.64105
RAB8B	0.0190997	0.00617623	0.15033	0.0938369	0.0522803
RABGAP1	0.0135794	0.000146577	0.0136082	0.00299578	0.00275917
RABGGTB	0.00863181	3.72271	3.79002	5.40722	3.95785
RABL6	0.00432552	0.0736332	0.0388009	0.029078	0.0328179
RAC2	1.24e-09	4.07546	6.88117	6.47585	7.18624
RAD21	1.1e-26	0.127931	3.21663	1.87479	2.27186
RAD23B	6.69e-08	2.64399	3.01185	0.802577	2.16412
RAF1	0.0489806	1e-05	0.0240659	0.000410919	1e-05
RANBP2	3.95e-13	1.59733	0.142176	0.0725631	1.40688
RANGAP1	2.76e-40	0.601058	2.04512	0.105546	0.159904
RAP1B	2.23e-07	1.67119	2.21304	1.78742	1.33
RAPGEF1	0.0255327	0.0141197	0.000711658	0.0375849	0.00232976
RAPGEF2	0.0216389	1e-05	0.000764379	0.0142551	0.126972
RARRES1	0.00033669	0.306577	0.0282529	1e-05	0.0466777
RARS1	2.89e-20	0.13336	0.410094	0.801073	0.641682
RARS2	6.82e-07	0.0778028	0.0982983	0.105523	0.795475
RASA1	2.93e-24	0.149605	2.06952	0.299323	1.13273
RAVER1	2.13e-42	0.289366	2.2271	2.02554	0.212614
RBBP4	1.24e-29	0.109676	0.0771455	1.7875	0.035875
RBBP7	7.32e-29	0.12583	0.0736014	1.77584	0.0365109
RBCK1	6.11e-11	17.3958	8.96375	3.20993	7.93634
RBL2	0.00248481	1e-05	1e-05	0.0064388	1e-05
RBM3	0.00135778	4.0554	2.88505	2.31479	3.13493
RBM39	1.36e-08	0.268318	0.809544	1.96056	1.03257
RBM47	2.3e-23	0.0576442	2.16655	1.93259	1.27928
RBM5	0.00204909	6.03923	6.84772	4.94025	6.24282
RBM8A	0.0119099	2.66326	2.96446	4.22903	1.57416
RBMX	2.34e-07	0.229364	0.853612	0.524236	0.787491
RBMXL1	5.25e-29	1.99197	0.0905591	0.108376	0.244432
RBMXL2	6.44e-08	0.234238	0.891591	0.563761	0.827297
RBP1	0.00108196	3.11229	1.49613	0.857137	1.37604
RBP4	0.012099	36.3065	36.1776	35.699	40.1663
RBPJL	0.0235676	0.00167923	1e-05	1e-05	0.000537576
RCAN1	0.00248481	1e-05	1e-05	0.13075	1e-05
RCL1	6.11e-33	1.46702	0.313859	2.28912	0.321644
RCN2	1.92e-11	0.606485	2.15133	1.97989	1.22504
RCN3	5.9e-31	0.127914	0.161163	0.128892	1.76512
RECK	4.33e-26	0.169605	0.0429684	0.0352145	0.031744
REG1B	1.64e-05	3.22369	3.49392	2.27226	2.91753
REG3G	0.00297275	0.00189475	0.0010099	1.52324	1e-05
REL	4.66e-24	2.26535	0.846768	0.15682	0.680558
RELA	0.00306115	3.98537	3.12161	2.79735	3.39744
RETREG2	1.83e-32	1.95257	0.215469	0.287797	0.202274
RFC1	5.38e-31	1.79716	0.0249881	0.0237728	0.207637
RFC4	0.0276966	0.0399249	0.0531327	0.0906795	0.000801435
RFESD	0.0477921	0.0175228	0.182821	0.570646	0.0161539
RFC5	8.35e-16	0.148546	0.262975	1.92373	0.299524
RFTN1	9.64e-34	0.121099	2.36983	0.344495	2.0025
RGN	0.0165493	2.17302	2.75323	2.38557	2.77638
RHOC	1.19e-20	0.0534085	0.054643	1.9172	0.059564
RHOG	1.09e-27	0.116449	2.15531	0.0807571	0.828001
RIC8A	1.01e-39	5.45455	0.536612	1.13163	0.158986
RIDA	8.28e-05	3.17782	4.01251	4.20916	4.67601
RIF1	0.00843152	2.12773	2.08155	1.96479	1.67272
RIMBP2	0.00785611	1e-05	0.207824	0.373004	0.0681727
RIN1	2.04e-20	0.271322	2.48611	1.9144	1.73637
RIPK1	0.0271712	0.27224	0.325308	0.196245	0.557726
RMC1	1.49e-05	16.0686	26.9969	26.6518	20.2688
RMDN1	1.67e-14	0.0633124	0.0707944	1.83861	0.794689
RMDN3	9.64e-44	0.104558	2.42176	0.28218	0.399288
RMND5A	0.0198886	1e-05	0.0915856	1e-05	0.0684384
RNASE2	5.79e-25	0.277029	2.56789	0.276124	1.25958
RNASET2	8.41e-16	0.0710232	0.111249	1.80787	0.0997447
RNF114	0.0367209	0.027621	0.251661	0.0611635	0.153338
RNF20	2.29e-17	0.0172303	0.0242213	1.5794	0.00985736
RNH1	1.04e-27	0.607706	0.962968	0.289822	2.87416
RO60	2.81e-07	1.8841	1.50516	2.15075	1.42214
ROBO4	0.0203795	0.00588074	0.0134062	0.0656679	0.0236706
ROCK1	2.04e-21	0.0599455	1.84759	0.252741	1.24543
ROCK2	0.00142902	1.99892	1.86386	0.321177	1.54836
RPA1	6.27e-10	1.82041	2.07453	0.144447	1.45683
RPA3	0.0324338	0.334852	0.635901	0.458345	0.415077
[truncated: 694 more rows]

## Sheet: Table S3B
Table S3B : List of significantly enriched terms in the functional enrichment analysis on DEPs
Group	pathway	p-value	Genes
HC	EGFR1	0.00040942	PHPT1; ANXA1; CAVIN1; RPLP0; PRKAA1; MAP2K2; CC2D1A; STAT2; H3-4; CCDC50; CD59; EPN1; CALD1; KRAS; PLSCR1; GRB10; APP; PTPRE; DOCK1; FLOT1; RBCK1; ARAF; EIF4G1
HC	Integrin	0.00245828	NCAN; COL7A1; ITGA1; DOCK1; MAP2K2; GPC4; ITGAM; DOCK10; KRAS
HC	Protein digestion and absorption - Homo sapiens (human)	0.00277862	COL7A1; SLC3A2; CELA3B; CELA3A; ATP1A4; PGA3; PGA4; PGA5
HC	Pyruvate metabolism	0.00433499	PDK1; DLAT; PDK4; PDK2
HC	glycine betaine degradation	0.00516525	SARDH; SHMT1
HC	Ubiquitin mediated proteolysis - Homo sapiens (human)	0.0055005	UBE4A; BIRC6; UBE2E1; UBE2E3; UBE2E2; KEAP1; CDC26; CUL1; CUL3
HC	Lysosome Vesicle Biogenesis	0.00856888	AP1M2; APP; AP1B1; VAMP7
HC	Spliceosome - Homo sapiens (human)	0.00888897	HNRNPA1L2; DDX39B; AQR; SF3B4; PRPF40B; RBMXL1; THOC1; SNRPA; PRPF4
HC	retinol biosynthesis	0.00920383	PNLIPRP1; RBP1; CES2
Fibro	TP53 Regulates Metabolic Genes	4.41161e-05	PRKAG1; AGO1; PRDX5; SFN; MTOR; COX6A1
Fibro	Tight junction - Homo sapiens (human)	0.000586124	RAB8B; JAM2; LLGL1; PRKAG1; ARPC5L; WAS; F11R
Fibro	RHOG GTPase cycle	0.00358528	DOCK5; RHOG; NDUFS3; ARHGDIA
Fibro	RHO GTPase cycle	0.00433315	ARHGEF10; RHOG; ARHGDIA; DOCK5; NDUFS3; AKAP12; MSI2; TRIP10; WAS; ARHGEF10L
Fibro	leucine degradation	0.00445667	DLD; HMGCLL1
Fibro	Peroxisome - Homo sapiens (human)	0.00517536	ACOX3; PRDX5; AGPS; HMGCLL1
Fibro	Signaling by Rho GTPases	0.00549436	SCAI; ARHGEF10; RHOG; MSI2; RANGAP1; DOCK5; SFN; NDUFS3; AKAP12; ARHGDIA; TRIP10; WAS; ARHGEF10L
Fibro	Insulin signaling pathway - Homo sapiens (human)	0.00619764	TRIP10; MTOR; RAF1; PRKAG1; PPP1CA
Fibro	Fc gamma R-mediated phagocytosis - Homo sapiens (human)	0.00898151	WAS; LYN; ARPC5L; RAF1
Papillo	Adherens junction - Homo sapiens (human)	6.73567e-05	SRC; TJP1; WASF2; WASF3; RHOA; CSNK2A3; CSNK2B; CTNNA2
Papillo	Vesicle-mediated transport	0.00041734	TSG101; SNX2; ARRB1; COL3A1; GAPVD1; ITSN1; SSC5D; NAPG; NAPB; NAPA; DCTN3; SRC; RAB3GAP2; RAB5B; ARPC2; COG4; AP4E1; DYNC1LI2; PAFAH1B1; TRAPPC8; VAMP3; TJP1; ANK2; KLC4; FOLR1
Papillo	Cell Cycle	0.00105276	PPP2R1A; TMPO; RFC5; RFC4; DSN1; POLA1; DCTN3; DERPC; PAFAH1B1; ERCC6L; SMC4; HMMR; SRC; MAU2; RBL2; CENPC; H2BC1; TERF2IP; DYNC1LI2; CSNK2A3; GINS3; RBBP7; RBBP4; CSNK2B
Papillo	DNA replication - Homo sapiens (human)	0.00503152	RFC5; SSBP1; POLA1; RFC4
Papillo	Pyrimidine metabolism	0.00583153	POLA1; CTPS2; NME2; POLR3G; TYMP; POLR2I
Papillo	Ferroptosis - Homo sapiens (human)	0.00802131	VDAC2; ACSL1; HMOX1; SLC39A14
Papillo	Protein export - Homo sapiens (human)	0.00963151	SRP68; SRPRB; SRP14
Papillo	Mismatch repair - Homo sapiens (human)	0.00963151	SSBP1; RFC4; RFC5
Papillo	RAC3 GTPase cycle	0.00995805	VAMP3; WASF2; CDC42EP1; TMPO; RAPGEF1; STBD1
BC	VEGF	0.000353902	RPS6KA1; RPS6KA2; RPS6KA3; PIK3CB; CAMK2G; FYN; CAMK2A; CAMK2B; RIPK1; CDK5; BRAF
BC	Histidine metabolism - Homo sapiens (human)	0.00045716	AOC1; MAOB; ALDH3B1; ALDH7A1
BC	Immune System	0.0018822	AOC1; NIT2; CHGA; ARL8A; RAP1A; RIPK1; EIF4A3; DNM1; DNM3; LTA4H; AP2S1; STAT5B; MGAM; FYN; ACAA1; MADCAM1; ITGAL; ALDH3B1; PSMD6; SEC22B; ARPC3; CAMK2G; CAMK2A; CAMK2B; SEC24B; SELL; RPS6KA1; CASP4; RPS6KA3; CASP2; LRRFIP1; EIF4G3; CD93; TKFC; SEC61A1; TCIRG1; UBE2A; NAPRT; CYLD; SEC61A2; RPS6KA2; LNPEP; TRIM3; PRCP; PIK3CB; FUCA2; CDC42
BC	Tyrosine metabolism	0.00221143	AOC1; MAOB; ALDH3B1; HGD
BC	Fructose and mannose metabolism - Homo sapiens (human)	0.00221143	HKDC1; AKR1B10; GMDS; TKFC
BC	Innate Immune System	0.00381222	AOC1; NIT2; CHGA; PSMD6; RAP1A; RIPK1; LTA4H; MGAM; FYN; ACAA1; ITGAL; ALDH3B1; ARL8A; ARPC3; RPS6KA2; SELL; RPS6KA1; CASP4; RPS6KA3; CASP2; LRRFIP1; CD93; TKFC; TCIRG1; NAPRT; CYLD; PRCP; PIK3CB; FUCA2; CDC42
BC	Proteasome Degradation	0.0044737	PSMB5; PSMA1; PSMD6; PSMD10; UCHL3
BC	ErbB signaling pathway	0.00464364	PIK3CB; CAMK2G; CAMK2A; CAMK2B; STAT5B; BRAF
BC	Neutrophil degranulation	0.00847509	AOC1; NIT2; ALDH3B1; ARL8A; SELL; MGAM; PSMD6; NAPRT; RAP1A; CD93; TCIRG1; ACAA1; ITGAL; LTA4H; PRCP; FUCA2

## Sheet: Table S3C
Table S3C : List of candidate proteins of classifier model in serum samples
OXCT1
HDGFL3
DDX39B
ACO1
SART3
COG1
ACTR2
QDPR
UMOD
DENND4C
CSTA
AOC2
RGN
MVP
TRAP1
UBE2L5
PTGFRN
SMARCC2
FKBP15
OXSR1
PLXNB1
TTR
PSMB3
GR
