# Supplementary material for: Proteome profiling of serum reveals PSMD6 as a biomarker in breast cancer metastasis
Source: Research Square preprint supplement (doi:10.21203/rs.3.rs-3634466/v1), 2023-12-11
Supplement: Supplementary file 4 [file 95ba3d38b676b441675d4134.xlsx]

## Sheet: Description
Table S6	PSMD6 OE and shPSMD6 result in vitro. Related to Figure 6
Sheet	Description
Table S6A	The correlation between clinical parameter correlation with PSMD6 expression level in luminal breast cancer patients by univariate analysis
Table S6B	Multivariate analysis of overall survival in luminal breast cancer using the Cox proportional hazards model
Table S6C	Prognostic factorc of overall survival in luminal breast cancer patients by univariate analysis

## Sheet: Table S6A
Table S6A :The correlation between clinical parameter correlation with PSMD6 expression level in luminal breast cancer patients by univariate analysis
	PSMD6 low expression	PSMD6 high expression	p-value
Age			0.499
≥60	51	34
<60	22	19
Tumor size			0.84
≥2cm	29	22
<2cm	44	31
Lymph node metastasis			0.022
Negative	44	21
Positive	29	32
Histological grade			0.218
I-II	53	33
III-IV	20	20
ACJJ			0.014
I-II	54	28
III-IV	19	25
Molecular type			0.419
Luminal	45	30
HER2	10	12
Basal-like	18	11

## Sheet: Table S6B
Table S6B : Multivariate analysis of overall survival in luminal breast cancer using the Cox proportional hazards model
Parameter	N	HR	95%CI	p-value
Age		3.122	1.455-6.698	0.499
≥60	85
<60	40
PSMD6 level		4.24	1.849-9.72	0.001
Low	72
High	53
Molecular type		0.011
Luminal	74
HER2	22	2.009	0.731-5.525	0.176
Basal-like	29	3.799	1.616-8.956	0.002

## Sheet: Table S6C
Table S6C : Prognostic factorc of overall survival in luminal breast cancer patients by univariate analysis
Parameter	N	Cumulative survival rates(%)		Mean survival time(Mo)	HR	95(%)	p-value
		3-years	5-years
Age					3.578	1.556-8.227	0.003
≥60	85	-	-	122.379
<60	40	-	83.5	109.134
Lymph node metastasis					0.974	0.217-4.363	0.972
Negative	64	-	-	123.4
Positive	61	-	88.8	112.172
Tumor size					1.191	0.535-2.649	0.669
≥2cm	75	-	92.5	116.09
<2cm	50	-	-	119.228
PSMD6 level					3.333	1.398-7.944	0.007
Low	72	-	-	124.22
High	53	-	-	108.229
ACJJ					1.916	0.493-7.450	0.348
I\II	81	-	92.9	122.633
III\IV	44	-	-	108.837
Histological grade					1.479	0.674-3.244	0.329
I-II	85	-	94.4	121.099
III-IV	40	-	-	109.94
Molecular type							0.044
Luminal	74	-	94.8	121.624
HER2	22	-	-	116.304	1.898	0.660-5.461	0.234
Basal-like	29	-	-	106.256	3.098	1.275-7.530	0.013
