# Supplementary material for: Proteome profiling of serum reveals PSMD6 as a biomarker in breast cancer metastasis
Source: Research Square preprint supplement (doi:10.21203/rs.3.rs-3634466/v1), 2023-12-11
Supplement: Supplementary file 5 [file a4993e4fbe707728304042c3.xlsx]

## Sheet: Description
Table S4	Differentially expressed proteins during BC progression. Related to Figure 4
Sheet	Description
Table S4A	List of differentially proteins (Kruskal-Wallis test p-value <0.05, ratio >2 or <0.5) in DCIS, DCIS-MI, IDC, MBC and normal serum samples
Table S4B	Z-scored intensities were calculated for 1313 DEPs during the progression of BC in serum samples
Table S4C	List of significantly enriched terms in the functional enrichment analysis on DEPs
Table S4D	List of candidate proteins (Kruskal-Wallis test p-value <0.05, ratio >2 or <0.5) in DCIS, DCIS-MI, IDC, MBC and HC serum samples

## Sheet: Table S4A
Table S4A : List of differentially proteins (Kruskal-Wallis test p-value <0.05, ratio >2 or <0.5) in DCIS, DCIS-MI, IDC, MBC and normal serum samples
	p-value	Upregulated in one group(between HC,DCIS,DCIS-MI,IDC-MBC)	Downregulated in one group(between HC,DCIS,DCIS-MI,IDC-MBC)
GCSH	9.16517e-34	DEPs	-
BRIX1	3.532e-27	DEPs	-
CELA3A	3.92268e-11	DEPs	-
WASHC5	6.21275e-26	DEPs	DEPs
SLC9A3R1	2.63979e-25	DEPs	-
EXOC1	1.77194e-18	DEPs	-
NCF1	1.20893e-25	DEPs	-
OLFM4	2.86069e-07	DEPs	-
SLC3A2	1.10636e-09	DEPs	DEPs
VAMP7	3.55768e-33	DEPs	-
SEPTIN10	7.86987e-25	DEPs	-
LBR	6.42995e-25	DEPs	-
DMPK	8.97816e-32	DEPs	-
SLC12A2	6.15869e-06	DEPs	-
CC2D1A	7.98913e-28	DEPs	DEPs
G0.00001T3	6.03268e-06	DEPs	-
GP6	1.83597e-31	DEPs	DEPs
SULT1A1	0.00793195	DEPs	-
MAP2K2	5.52569e-28	DEPs	-
WDR36	3.02097e-31	DEPs	-
CDH6	2.86018e-31	DEPs	DEPs
KEAP1	5.43261e-28	DEPs	-
KP0.000015	1.11947e-11	DEPs	-
GDPD1	8.11756e-35	DEPs	DEPs
VPS8	2.08583e-07	DEPs	-
ITGAM	0.000215846	DEPs	-
CDC123	1.11769e-31	DEPs	-
PLCD3	5.55385e-33	DEPs	DEPs
G0.00001T2	1.81184e-06	DEPs	-
TNXA	0.00193541	DEPs	-
DLAT	5.30259e-30	DEPs	-
FCHSD1	1.18122e-36	DEPs	-
G0.00001L	5.5238e-06	DEPs	-
PRORP	0.0105538	DEPs	-
CES2	2.27327e-26	DEPs	-
LAMTOR2	1.3861e-23	DEPs	DEPs
ATAD1	6.46451e-26	DEPs	DEPs
GLA	6.83954e-27	DEPs	-
TMED9	6.80697e-30	DEPs	DEPs
VWA1	1.57772e-27	DEPs	-
IFI16	4.90668e-26	DEPs	-
DPP7	6.22039e-27	DEPs	-
PSIP1	4.11401e-25	DEPs	DEPs
SLC25A42	1.6848e-39	DEPs	-
VPS35	5.31142e-28	DEPs	DEPs
RPS6	8.56965e-28	DEPs	-
CBR3	6.64513e-30	DEPs	-
FLG2	9.70191e-05	DEPs	-
AP1B1	3.52018e-26	DEPs	DEPs
ACAD8	3.43553e-30	DEPs	-
SMPD4	1.50634e-28	DEPs	-
SULT1A4	3.07811e-09	DEPs	-
KRAS	1.40476e-27	DEPs	DEPs
CZIB	2.80037e-37	DEPs	DEPs
PPIG	9.57296e-32	DEPs	-
RETREG2	7.97518e-26	DEPs	DEPs
IGLV5-45	4.52271e-21	DEPs	-
TBCA	7.91917e-23	DEPs	-
CMPK1	1.36415e-26	DEPs	DEPs
CMBL	0.00275973	DEPs	-
PDK1	4.98261e-34	DEPs	DEPs
ATP12A	9.35363e-33	DEPs	-
PIP	5.76845e-26	DEPs	-
MISP	5.13908e-25	DEPs	DEPs
DSTN	9.06919e-30	DEPs	DEPs
ALAD	2.84738e-26	DEPs	DEPs
NUCB1	1.14277e-06	DEPs	-
CUL3	2.11852e-29	DEPs	DEPs
UPF1	0.0021428	DEPs	-
DCTN4	5.18823e-33	DEPs	DEPs
PSMB7	8.69372e-28	DEPs	DEPs
MAP1S	1.89087e-28	DEPs	DEPs
NCF1B	8.53041e-26	DEPs	-
NUFIP2	6.16656e-35	DEPs	-
POLG2	2.24692e-40	DEPs	-
PTPRZ1	3.32539e-24	DEPs	-
ITGA1	2.85282e-28	DEPs	-
PEX1	1.0529e-26	DEPs	-
PDK2	1.1891e-35	DEPs	DEPs
SHMT1	2.89573e-09	DEPs	-
CRISP3	1.17432e-25	DEPs	-
SF1	1.17358e-35	DEPs	DEPs
CUL1	0.000613995	DEPs	-
DHX9	2.21078e-05	DEPs	-
IL6ST	1.97009e-16	DEPs	-
ACAD10	4.39248e-39	DEPs	DEPs
DPEP2	5.06829e-18	DEPs	-
KLK10	5.615e-30	DEPs	-
FLOT1	1.87968e-13	DEPs	-
GNPAT	5.01553e-28	DEPs	DEPs
POLR2C	2.80764e-31	DEPs	-
SGCE	7.23837e-17	DEPs	-
KP0.000016	6.33803e-11	DEPs	-
CSTF1	3.94891e-27	DEPs	DEPs
SP140L	1.41114e-32	DEPs	-
ZCRB1	1.18246e-21	DEPs	-
TMEM33	5.37302e-32	DEPs	-
AP3B1	1.57032e-23	DEPs	-
AKR1C4	2.34202e-30	DEPs	DEPs
CCNK	2.99027e-15	DEPs	-
RIC8A	7.95855e-32	DEPs	DEPs
USP11	5.11382e-27	DEPs	-
TGFB1	4.06823e-28	DEPs	-
PDK4	2.10296e-36	DEPs	DEPs
DOCK1	9.30574e-10	DEPs	-
HDGFL2	2.73894e-28	DEPs	DEPs
NCAN	3.10202e-27	DEPs	-
HNRNPA1L2	4.7429e-25	DEPs	-
PVR	9.25122e-32	DEPs	DEPs
SLC44A2	1.33001e-29	DEPs	-
TWF1	9.32325e-24	DEPs	-
CNN3	2.39465e-11	DEPs	-
OAS3	2.13604e-29	DEPs	DEPs
SUB1	3.0871e-32	DEPs	-
SNX4	6.94863e-28	DEPs	DEPs
GID8	4.05971e-26	DEPs	-
KP0.000011	1.66934e-10	DEPs	-
DOCK10	1.91817e-21	DEPs	-
VPS18	2.12881e-28	DEPs	-
RECK	7.91485e-22	DEPs	DEPs
ABCF3	1.45597e-28	DEPs	DEPs
PIGS	8.98486e-29	DEPs	DEPs
TACO1	9.61242e-36	DEPs	DEPs
MVK	0.000774381	DEPs	-
RARRES1	0.00953434	DEPs	-
N4BP2L1	0.0110634	DEPs	-
NOP16	0.013898	DEPs	DEPs
IRF4	0.0177783	-	DEPs
LGALS9C	0.0278933	DEPs	-
TMEM128	0.00528348	-	DEPs
EMC8	6.27619e-25	-	DEPs
TRMT10C	0.00782185	DEPs	DEPs
CLN5	5.88024e-05	-	DEPs
CHURC1	1.46813e-14	-	DEPs
LGALS9B	0.0278933	DEPs	-
DNMT3A	0.0427561	DEPs	-
PGGT1B	0.024835	DEPs	-
BPNT1	0.0123109	DEPs	-
DNTTIP2	0.0486194	DEPs	DEPs
PRDX3	2.4431e-29	-	DEPs
SNX30	1.75467e-25	-	DEPs
BSN	3.88533e-30	-	DEPs
THOC1	0.0039568	DEPs	-
SRPK2	0.0316268	DEPs	-
FIP1L1	0.0109835	-	DEPs
SBF1	0.0312363	-	DEPs
ALPG	0.000219211	DEPs	-
SARDH	0.006529	DEPs	-
DPY19L1	0.024835	DEPs	-
GMFB	8.25889e-05	DEPs	DEPs
ISCU	0.024835	DEPs	-
TMEM106C	0.0114193	DEPs	-
PES1	0.0392783	-	DEPs
STK10	0.00954803	DEPs	-
CIAPIN1	0.0221283	DEPs	-
BID	0.00922276	-	DEPs
COL7A1	2.52703e-27	-	DEPs
TMPRSS11E	0.000910071	DEPs	-
EARS2	0.0217812	DEPs	DEPs
MMP3	9.57507e-28	-	DEPs
SLIT3	0.0478176	DEPs	DEPs
ELMOD2	0.000592582	DEPs	-
VPS36	2.3657e-26	-	DEPs
FOXO3	0.0347816	DEPs	-
OXLD1	0.00682558	-	DEPs
TREH	9.39944e-23	-	DEPs
NTM	0.00389152	DEPs	DEPs
TBC1D10A	0.0310267	DEPs	-
ZC3HC1	0.0220218	DEPs	-
ARMC5	0.022915	DEPs	DEPs
ATP1A4	4.00224e-28	-	DEPs
FABP7	0.0035637	DEPs	-
SCGN	0.00445892	-	DEPs
TBC1D13	0.0122958	DEPs	-
TG	0.0437349	DEPs	-
PPM1B	0.0149484	DEPs	-
SPATA5	0.0427792	DEPs	DEPs
AP1M2	0.000175786	DEPs	DEPs
ANXA11	0.0473703	DEPs	DEPs
ALPP	0.000219211	DEPs	-
G0.00001T1	2.28176e-06	DEPs	-
NCF1C	1.5526e-25	DEPs	-
PDGFB	0.0142185	DEPs	DEPs
PNLIPRP1	1.8484e-26	DEPs	DEPs
SULT1A3	3.07811e-09	DEPs	-
CCL18	0.0346441	-	DEPs
CELA3B	5.00353e-08	-	DEPs
RBBP7	1.95166e-19	DEPs	DEPs
SNCA	0.0303485	-	DEPs
ACOT2	4.24656e-11	DEPs	-
ITSN1	2.80315e-13	DEPs	-
ITGAD	0.0164455	DEPs	-
MAP7D1	9.94305e-17	DEPs	-
HEPACAM	1.48047e-11	DEPs	-
SRP68	8.72079e-21	-	DEPs
ARRB1	6.63531e-14	DEPs	-
PSMD1	7.80001e-12	DEPs	-
COL11A2	3.42609e-16	DEPs	-
TFPI	1.31954e-11	DEPs	-
NIBAN1	9.94634e-17	DEPs	DEPs
TBC1D22A	0.037724	DEPs	DEPs
SRSF2	9.79249e-14	DEPs	-
MLPH	9.80679e-16	DEPs	DEPs
MPST	1.41098e-11	DEPs	-
XRN2	3.09801e-12	DEPs	-
ATP6V1C1	1.36548e-17	DEPs	DEPs
CA12	3.12391e-21	-	DEPs
DERA	1.0882e-19	DEPs	DEPs
SAMD9L	0.000206046	DEPs	-
WASF3	0.00996365	DEPs	DEPs
ATAD3A	3.75097e-11	DEPs	-
PKN2	2.45892e-10	DEPs	-
GADD45GIP1	2.8425e-15	DEPs	-
HLA-B	0.0110734	DEPs	-
KRT31	6.44488e-23	-	DEPs
HMOX1	0.00453243	DEPs	-
FHL3	0.0164455	DEPs	-
CDC42EP1	1.67773e-27	-	DEPs
PRKAR1A	8.07811e-13	DEPs	-
H2BC1	6.21458e-30	DEPs	DEPs
MAT1A	8.21894e-15	DEPs	-
ELF1	1.18197e-22	DEPs	-
VAT1	1.36493e-21	DEPs	-
ESAM	3.50722e-12	DEPs	-
DT0.00001	3.27342e-20	DEPs	-
ITPR3	1.10665e-26	DEPs	-
EXOSC3	1.62236e-17	DEPs	-
IBA57	1.3914e-21	DEPs	DEPs
TBCE	1.0141e-18	DEPs	-
NUDT5	2.5675e-24	DEPs	-
KRT222	4.84635e-20	DEPs	-
CSTF3	1.47356e-22	DEPs	DEPs
KLC4	2.05909e-17	DEPs	DEPs
DDX50	1.2412e-22	-	DEPs
LRRC8D	0.00732416	DEPs	-
STARD13	6.74526e-05	DEPs	-
0.00001PB	0.0434486	DEPs	-
SNX27	3.51536e-21	-	DEPs
NGLY1	0.0315654	-	DEPs
CTPS2	2.4864e-29	-	DEPs
ANP32B	7.68161e-17	DEPs	DEPs
STBD1	0.00889998	-	DEPs
CLCA2	0.0428774	DEPs	-
SLC11A2	0.0164455	DEPs	-
CDH16	0.00695881	DEPs	-
TRAF1	0.0164455	DEPs	-
POLR1A	0.0032899	DEPs	DEPs
TGM1	4.39714e-08	-	DEPs
ADPRH	0.0344623	-	DEPs
SERPINI1	0.0077741	-	DEPs
FLAD1	1.59922e-16	-	DEPs
TOMM34	0.0141984	-	DEPs
PDLIM7	0.040436	-	DEPs
RFC5	8.09964e-10	DEPs	-
MED8	0.0333575	-	DEPs
PSMA2	6.43235e-21	DEPs	-
BLOC1S2	0.00275032	DEPs	-
DCTN3	0.0479002	-	DEPs
RBBP4	1.20969e-20	-	DEPs
CHMP4B	0.0302935	DEPs	-
ANKHD1	2.84953e-16	DEPs	-
EML3	0.00139278	DEPs	DEPs
FBXO7	0.0392059	DEPs	-
COL18A1	1.08271e-05	DEPs	-
SARNP	4.14161e-21	DEPs	DEPs
MXRA7	0.0164455	DEPs	-
TRA2B	1.25694e-14	DEPs	-
STX1B	1.15711e-18	DEPs	DEPs
PYCARD	5.76241e-17	DEPs	-
STK4	5.82099e-15	DEPs	-
FDXR	3.03773e-11	DEPs	-
ARHGEF10L	2.46157e-09	DEPs	-
ATP6V1H	1.68584e-19	DEPs	DEPs
ARHGEF10	5.81711e-21	-	DEPs
PPP1CA	3.6208e-05	DEPs	-
TMED10	6.66368e-17	DEPs	-
UBFD1	1.9853e-15	DEPs	-
CPSF1	1.29366e-14	DEPs	DEPs
GBF1	6.51686e-17	DEPs	DEPs
R0.00001SE2	4.43493e-26	DEPs	-
AGO1	1.31911e-27	DEPs	DEPs
EHMT2	0.0164455	DEPs	-
MOCS3	0.0462928	DEPs	DEPs
SIAE	2.06584e-31	DEPs	-
TOR1B	0.0164455	DEPs	-
SCCPDH	1.14003e-26	DEPs	-
GFM2	0.00881638	-	DEPs
STT3B	4.3765e-22	DEPs	-
AP2M1	7.79674e-21	-	DEPs
TLE3	3.599e-21	DEPs	-
SLC1A1	0.0049768	DEPs	-
A0.00001PC2	1.2458e-25	DEPs	-
PLIN2	4.4887e-20	DEPs	-
GIMAP5	0.0115934	DEPs	-
CD2BP2	0.0164455	DEPs	-
EXOC4	3.7463e-22	-	DEPs
TEX10	0.016217	DEPs	-
TTC27	0.0164455	DEPs	-
TGFB1I1	0.0258073	-	DEPs
C11orf96	0.0164455	DEPs	-
CCDC134	0.00459799	DEPs	-
FYTTD1	0.00225986	DEPs	-
FMN2	0.0164455	DEPs	-
MRPL41	0.0164455	DEPs	-
ITPKB	0.0049768	DEPs	-
SBSPON	0.0164455	DEPs	-
BPIFA1	0.0164455	DEPs	-
DOCK5	2.51732e-19	-	DEPs
DUSP14	0.0164455	DEPs	-
BRMS1	0.0164455	DEPs	-
SLC27A1	7.60997e-16	DEPs	DEPs
POLR2H	2.05303e-07	DEPs	-
FGL1	0.0368415	DEPs	DEPs
PXYLP1	0.0164455	DEPs	-
MIER1	0.0037184	DEPs	-
STK25	0.0234921	DEPs	-
CPEB3	0.0164455	DEPs	-
SLC9A3	0.0164455	DEPs	-
CAMK2B	4.81346e-28	DEPs	DEPs
NDE1	0.0114441	DEPs	DEPs
PIK3CB	1.51619e-18	DEPs	DEPs
MBD2	1.09315e-18	DEPs	-
RPS6KA2	1.1401e-17	DEPs	DEPs
RNF126	0.0164455	DEPs	-
WDR44	2.13168e-16	DEPs	-
SEC61A2	5.48412e-25	DEPs	-
CASP4	7.8416e-14	DEPs	-
ABCB1	1.18229e-21	DEPs	-
CAMK2G	4.44628e-19	DEPs	-
CNOT9	1.4144e-21	DEPs	DEPs
WDR47	2.35341e-26	DEPs	DEPs
ITGA2B	1.49598e-16	DEPs	DEPs
ATAD3C	1.91731e-15	DEPs	-
THNSL1	1.57924e-14	DEPs	-
NOMO2	1.42601e-13	DEPs	DEPs
APOBEC3G	9.74845e-29	-	DEPs
EIF2S2	5.33633e-19	DEPs	-
ANK3	7.51246e-15	DEPs	DEPs
IDH3B	7.20552e-17	DEPs	-
CLIC6	5.49462e-19	DEPs	DEPs
CUBN	3.03135e-20	DEPs	DEPs
PIKFYVE	2.16289e-19	DEPs	DEPs
FUCA2	2.18636e-21	DEPs	-
OSBPL3	1.29297e-15	DEPs	-
ASPSCR1	1.6349e-19	DEPs	DEPs
COL8A1	6.80803e-18	DEPs	-
PDXDC1	7.94234e-16	DEPs	-
CPOX	4.87852e-28	-	DEPs
RAB18	3.43185e-17	DEPs	-
SEC24A	2.99965e-17	DEPs	DEPs
RBMXL3	3.27768e-12	DEPs	-
GMIP	2.97187e-14	DEPs	DEPs
LRP6	3.04443e-15	DEPs	-
TCIRG1	1.31596e-18	DEPs	DEPs
CDCA2	0.0164455	DEPs	-
ITGA5	1.05886e-17	DEPs	-
EPN2	5.06497e-19	DEPs	-
LSM4	3.26995e-14	DEPs	-
DPYD	2.28833e-13	DEPs	-
PARP4	1.06825e-12	DEPs	-
SEC61A1	1.36903e-22	DEPs	-
STAM2	3.66369e-24	DEPs	-
SNIP1	6.3859e-15	DEPs	DEPs
MXRA8	3.53478e-12	DEPs	-
SEPTIN6	1.59543e-20	DEPs	-
FKBP10	5.04807e-11	DEPs	DEPs
NDUFAF7	5.79725e-16	DEPs	-
SCARB1	3.15718e-22	DEPs	DEPs
MYO7B	6.83933e-14	DEPs	-
BRD3	0.0164455	DEPs	-
HEATR1	4.22197e-25	-	DEPs
NUP210	4.85075e-21	DEPs	DEPs
OPLAH	2.77036e-15	DEPs	-
STXBP2	2.23045e-25	-	DEPs
DFFA	0.000199732	DEPs	-
ENPP6	8.22048e-20	DEPs	-
VTI1B	9.31939e-14	DEPs	-
GINS1	4.58741e-19	DEPs	-
HSP90AA4P	6.02813e-20	DEPs	-
ARPC3	5.14826e-18	DEPs	-
ECE1	2.47513e-19	DEPs	DEPs
FYN	2.10119e-16	DEPs	-
ZAP70	0.0221697	DEPs	DEPs
ATP6V1E1	3.38588e-19	DEPs	-
NLRX1	6.95835e-19	DEPs	-
ARFIP1	5.18754e-13	DEPs	-
RENBP	0.0170079	-	DEPs
GOLGA2	1.01186e-11	DEPs	-
P4HA1	3.72438e-19	DEPs	DEPs
MB21D2	1.21339e-16	DEPs	-
RPS6KA1	2.11751e-16	DEPs	DEPs
PTPRM	1.11656e-20	DEPs	DEPs
EIF4H	9.31132e-16	DEPs	-
PFDN4	7.24479e-22	DEPs	-
PKP1	3.5321e-13	DEPs	-
TRIM3	8.35697e-22	DEPs	-
SUGT1	5.931e-18	DEPs	-
NELFB	9.7265e-13	DEPs	-
NOMO3	1.42601e-13	DEPs	DEPs
RRP8	5.51061e-14	DEPs	-
ACAD9	2.24772e-13	DEPs	-
FLG	5.80512e-23	-	DEPs
CDK5	2.51363e-18	DEPs	DEPs
SPRN	0.0164455	DEPs	-
RPS6KA3	3.52177e-24	DEPs	DEPs
0.00001PRT	6.30519e-32	DEPs	-
RASAL1	0.0032903	DEPs	DEPs
STAT5B	2.38547e-26	DEPs	DEPs
PKP3	2.20053e-30	DEPs	-
LPP	3.72193e-30	DEPs	-
YBX2	1.93821e-29	DEPs	-
KIF13B	2.04927e-31	DEPs	-
ADAMTSL4	2.01316e-27	DEPs	-
DSG2	1.00039e-06	DEPs	-
UGDH	8.40687e-26	-	DEPs
WDR17	0.0164455	DEPs	-
RNF113A	0.0164455	DEPs	-
CD93	7.80737e-05	DEPs	-
MYBBP1A	1.96526e-27	DEPs	-
NDUFB4	3.74307e-15	DEPs	-
PIPSL	0.0132503	DEPs	DEPs
CHD5	2.82589e-26	DEPs	-
AOC1	3.76932e-20	DEPs	-
ALG11	1.91046e-28	DEPs	DEPs
ATP2A3	1.61976e-27	DEPs	DEPs
SEC24B	5.20205e-31	DEPs	-
TRNT1	1.72925e-28	DEPs	-
MADD	1.7446e-37	DEPs	DEPs
NOP14	1.81403e-33	DEPs	-
DDI2	7.66424e-21	DEPs	DEPs
MUC4	4.83153e-06	DEPs	-
FBXO3	1.45389e-23	DEPs	-
EIF3H	1.03334e-20	DEPs	DEPs
RPTOR	1.31518e-24	DEPs	-
COX5A	4.52659e-20	DEPs	-
MGAM	2.58711e-22	DEPs	DEPs
SUSD2	2.11501e-28	DEPs	-
DNM1	1.09311e-25	DEPs	-
UBQLN2	3.27687e-20	DEPs	-
LMAN2L	3.44633e-19	DEPs	DEPs
HNF1A	0.0164455	DEPs	-
TP53BP1	1.37131e-19	DEPs	-
CDC42BPB	3.70329e-22	DEPs	DEPs
0.00001NS	7.66142e-22	DEPs	DEPs
EIF2S1	3.33159e-20	DEPs	-
PSMD6	5.16985e-23	DEPs	DEPs
ITGAL	1.97556e-20	DEPs	-
BTAF1	1.40135e-20	DEPs	-
HTT	8.41104e-24	DEPs	DEPs
CASP2	6.67486e-21	DEPs	-
TANGO2	4.9259e-21	DEPs	-
GSDMA	5.75714e-21	DEPs	-
HSPA12A	1.69719e-22	DEPs	-
DNM3	7.92755e-23	DEPs	DEPs
LARP7	2.35506e-22	-	DEPs
ARSH	1.07518e-34	-	DEPs
DDR2	0.0164455	DEPs	-
PHYHD1	6.74526e-05	DEPs	-
ITPRIP	0.0164455	DEPs	-
DHX36	0.000508247	DEPs	-
SFRP1	0.0146771	DEPs	-
ICAM5	0.0164455	DEPs	-
PI4KB	0.00495988	DEPs	-
KL	0.0164455	DEPs	-
PLA2R1	0.0164455	DEPs	-
LRP5	0.0164455	DEPs	-
GMPR2	7.16807e-23	-	DEPs
AKR1B10	2.82847e-16	-	DEPs
LNPEP	2.10222e-28	-	DEPs
UTP25	0.0037184	DEPs	-
BTN2A2	0.0164455	DEPs	-
TSC22D2	0.0251975	DEPs	DEPs
H1-3	3.97025e-23	-	DEPs
SERPINB2	8.00161e-17	DEPs	DEPs
PDE4B	0.0164455	DEPs	-
HMGB2	2.27589e-19	DEPs	-
IMPDH1	2.14855e-05	DEPs	-
RPL10L	0.0454037	-	DEPs
MTCH2	0.0178924	DEPs	DEPs
LRRC40	6.34509e-15	-	DEPs
ZSCAN18	0.0164455	DEPs	-
RPS8	4.36683e-26	DEPs	DEPs
ZC3HAV1L	0.0164455	DEPs	-
MTIF3	0.0164455	DEPs	-
TBP	0.0164455	DEPs	-
GAB2	0.0472462	DEPs	-
CCDC90B	4.02036e-30	-	DEPs
NBEAL2	0.0278484	-	DEPs
CBFB	0.0405723	DEPs	DEPs
CPEB2	0.0164455	DEPs	-
REEP5	0.0164455	DEPs	-
MMAA	0.0254025	DEPs	-
LILRB5	0.0254025	DEPs	-
NPTN	0.0164455	DEPs	-
TEAD1	0.0164455	DEPs	-
OPHN1	0.0471059	DEPs	-
CSDE1	7.34109e-30	-	DEPs
CDC42EP3	0.0164455	DEPs	-
RBBP6	0.0254771	DEPs	-
EIF4B	2.92319e-24	-	DEPs
OCLN	3.52361e-28	DEPs	-
CPEB4	0.0164455	DEPs	-
OXSR1	1.17743e-19	-	DEPs
NCOA1	0.0164455	DEPs	-
LSM1	8.81531e-27	-	DEPs
ALKBH5	0.0164455	DEPs	-
DDTL	0.026494	DEPs	-
LSR	1.28516e-21	DEPs	-
SFT2D2	0.0164455	DEPs	-
MTFR1L	1.44868e-33	DEPs	DEPs
SAMM50	8.42074e-28	-	DEPs
SLC35F6	0.0164455	DEPs	-
PARG	1.51764e-31	-	DEPs
THYN1	0.0166962	DEPs	DEPs
KAT0.00001L1	0.0164455	DEPs	-
FAM241B	0.0189174	DEPs	-
NIPS0.00001P1	0.0218753	-	DEPs
TMEM205	7.12433e-11	-	DEPs
TMEM126A	4.74296e-25	-	DEPs
PRPH	1.13009e-19	-	DEPs
POLR2A	4.0048e-25	-	DEPs
DCXR	3.59984e-26	-	DEPs
CDK9	0.00295813	DEPs	-
SUMO2	0.0164455	DEPs	-
H1-2	1.26192e-22	-	DEPs
AGPAT2	0.0164455	DEPs	-
CAMK2A	8.54439e-23	DEPs	DEPs
RAP1A	7.88875e-25	-	DEPs
TBC1D5	1.09789e-31	-	DEPs
ARRDC1	0.0164455	DEPs	-
PTPA	1.5294e-16	DEPs	-
WDR11	1.48649e-18	-	DEPs
DENND1A	0.0164455	DEPs	-
GMDS	6.83127e-15	DEPs	-
EEPD1	0.0164455	DEPs	-
ARSL	7.58596e-33	-	DEPs
DPYSL3	1.81553e-10	-	DEPs
TMEM53	0.0164455	DEPs	-
CNTROB	0.0164455	DEPs	-
RIOK2	0.0164455	DEPs	-
CBX7	0.0037184	DEPs	-
FER	0.0164455	DEPs	-
RAPGEF2	0.0050552	DEPs	-
CTR9	5.21227e-29	-	DEPs
LRP2	0.00032062	-	DEPs
AADAC	0.0164455	DEPs	-
EVI5L	0.0164455	DEPs	-
SLC25A32	0.0164455	DEPs	-
MRPS17	0.00652017	DEPs	-
STK38L	0.0472462	DEPs	-
IDH2	4.60815e-29	DEPs	DEPs
DUOX2	2.42855e-26	-	DEPs
ARHGAP31	0.0071071	DEPs	-
SMYD4	0.0164455	DEPs	-
CELSR1	0.0164455	DEPs	-
HKDC1	3.17486e-26	-	DEPs
GRIK3	0.020378	DEPs	-
SPINK1	0.00289376	DEPs	-
SLK	9.15962e-28	DEPs	-
LTBP4	8.30367e-09	DEPs	-
ELAC2	1.12297e-26	DEPs	-
OSBP	6.78362e-27	DEPs	-
AK1	1.01925e-20	DEPs	-
PDCD4	0.048234	DEPs	-
MAOA	0.0233259	DEPs	DEPs
WDFY1	1.25437e-12	DEPs	-
TXNIP	3.41336e-22	DEPs	-
GPN2	0.0254025	DEPs	-
GCC2	0.000674544	DEPs	-
NDUFS1	2.11105e-11	DEPs	-
CEACAM6	2.64779e-25	DEPs	DEPs
RCL1	1.66226e-19	DEPs	-
ACAN	8.43585e-20	DEPs	-
BCAN	7.96568e-25	DEPs	DEPs
DOCK11	0.00452144	DEPs	-
PRTN3	0.0497003	DEPs	-
FDPS	1.61919e-33	DEPs	DEPs
GARS1	5.91369e-27	DEPs	DEPs
ARHGAP25	4.47389e-27	DEPs	-
ACLY	2.02606e-08	DEPs	DEPs
HSP90AA2P	9.9188e-26	DEPs	DEPs
NDUFB8	0.0485248	-	DEPs
PIGG	0.0352087	-	DEPs
DRG1	9.46055e-18	DEPs	DEPs
FHOD1	8.55311e-24	DEPs	-
DDX58	1.86715e-19	DEPs	-
GPRC5C	3.1608e-25	DEPs	-
RPL8	4.85102e-28	DEPs	-
GLB1	0.0209384	-	DEPs
MMP10	1.36578e-29	DEPs	DEPs
BLOC1S4	2.00343e-24	DEPs	-
PACSIN2	1.74807e-27	-	DEPs
SFTPA1	0.0430215	-	DEPs
BANF1	0.0310252	DEPs	-
0.00001P1L4	2.36359e-26	DEPs	-
HSD17B13	0.00177636	DEPs	DEPs
ATPAF1	7.93014e-26	DEPs	-
DENND4C	1.51959e-29	DEPs	-
D0.00001JC13	0.000160127	DEPs	-
RPL4	2.34114e-11	DEPs	DEPs
HID1	3.21642e-13	DEPs	-
D0.00001JB4	4.16272e-21	DEPs	-
STK39	1.07617e-25	-	DEPs
CYRIA	1.09647e-15	DEPs	DEPs
PPP2R2A	4.2815e-09	DEPs	-
PSMD10	1.34352e-17	DEPs	DEPs
BIRC6	0.0124637	DEPs	-
HIP1R	2.59467e-14	DEPs	DEPs
SH3BP1	1.96496e-12	-	DEPs
RARS1	1.47559e-19	-	DEPs
FAM135A	1.09541e-24	DEPs	-
RNF2	9.10277e-18	DEPs	-
RBM12	9.56366e-13	DEPs	-
PCDH1	4.31143e-10	DEPs	DEPs
DDX6	4.33583e-20	DEPs	DEPs
AP3M1	6.13792e-11	DEPs	-
GTF3C4	6.53858e-18	DEPs	-
GSTM3	4.7114e-17	DEPs	-
HERC4	1.26823e-09	-	DEPs
DLG1	0.0215042	DEPs	-
ADI1	4.85992e-14	DEPs	-
CLTCL1	1.4051e-05	DEPs	-
CBX1	3.90689e-11	DEPs	-
ADH1C	3.04937e-24	-	DEPs
INPPL1	3.81085e-09	DEPs	-
LDLRAP1	6.94314e-24	DEPs	-
SF3A1	2.1621e-14	DEPs	DEPs
NIPS0.00001P2	1.92685e-14	DEPs	DEPs
CDK5RAP3	1.36032e-17	DEPs	-
BZW2	1.25515e-20	DEPs	DEPs
RAB22A	0.024835	DEPs	-
AOC2	6.28126e-13	DEPs	-
EPB41L1	1.50445e-16	DEPs	-
OGT	6.17529e-13	DEPs	-
MYD88	2.6798e-15	DEPs	DEPs
MAG	4.95931e-15	DEPs	DEPs
SPG21	0.0283166	DEPs	-
LRCH1	0.0474409	-	DEPs
MICALL2	8.36648e-11	DEPs	-
HDAC6	1.71017e-18	-	DEPs
GDA	2.38929e-22	DEPs	-
ZNF830	0.00115205	DEPs	-
D0.00001JA3	4.03847e-22	DEPs	-
MRPL15	2.06167e-11	DEPs	-
NQO2	0.00012303	DEPs	-
SNX8	0.00425523	-	DEPs
SVIL	3.53128e-16	DEPs	-
ITGB2	1.1113e-17	DEPs	-
TIMM50	0.0128766	-	DEPs
GIPC2	1.03717e-14	DEPs	-
VMA21	0.0148907	-	DEPs
FUT3	2.89563e-08	DEPs	-
ABHD10	1.21503e-15	DEPs	DEPs
ECPAS	8.79248e-08	DEPs	-
COPA	0.000132095	DEPs	-
FGB	0.0494235	-	DEPs
ADGRL2	0.00169271	DEPs	-
GRK2	2.78334e-16	DEPs	-
SEMA7A	2.10295e-21	DEPs	DEPs
PLOD3	2.73054e-11	DEPs	-
MAOB	1.09094e-23	DEPs	DEPs
BRAT1	4.13928e-11	DEPs	-
MRPS5	2.54601e-15	DEPs	-
PPP2R5D	3.41764e-20	-	DEPs
PAK1	9.05409e-12	DEPs	-
CLUH	5.49012e-19	-	DEPs
GGT5	6.25415e-21	DEPs	-
PCYT2	2.56815e-15	DEPs	-
MLYCD	0.00111229	DEPs	DEPs
NDUFA5	0.0296747	DEPs	DEPs
HCK	6.01985e-11	DEPs	-
LSM3	1.17161e-12	DEPs	-
WIPI2	4.43985e-23	DEPs	-
BAG3	2.28303e-21	DEPs	-
TPPP3	1.46182e-13	DEPs	-
ORC3	0.0291201	-	DEPs
THEM6	0.0049768	DEPs	-
TXNL4A	6.74477e-15	DEPs	DEPs
ISOC1	7.02325e-22	DEPs	-
XPNPEP2	0.000178275	DEPs	-
EXOC6B	3.12444e-18	DEPs	DEPs
ATP1B1	7.672e-12	DEPs	-
C1orf56	1.09584e-12	DEPs	DEPs
SNRPE	1.38194e-17	DEPs	-
PRKAB2	1.17386e-19	DEPs	-
NXF1	4.49075e-29	-	DEPs
PSMA4	8.72241e-12	DEPs	DEPs
DOCK9	6.8116e-15	DEPs	-
HPCAL1	4.0141e-15	DEPs	-
ERP44	7.69795e-10	DEPs	DEPs
ATAT1	8.6547e-15	DEPs	-
HDHD5	3.28509e-14	DEPs	-
PTP4A2	1.43532e-24	DEPs	DEPs
UBE2N	3.03107e-29	DEPs	-
TBC1D24	1.82503e-27	DEPs	-
UGT2B15	0.0040365	-	DEPs
NEO1	1.89507e-27	DEPs	DEPs
GOLPH3	0.029132	-	DEPs
RASA1	4.75553e-27	DEPs	-
AIFM1	1.90211e-27	DEPs	DEPs
CDH17	3.08451e-28	DEPs	-
MRPS26	0.00633784	DEPs	-
CCDC22	1.76482e-26	DEPs	DEPs
APPL1	0.0304889	-	DEPs
PTPN13	3.49883e-31	DEPs	-
ANKRD17	1.17788e-28	DEPs	DEPs
ARL8A	1.4862e-22	DEPs	-
PFAS	9.93164e-27	DEPs	-
FAM102A	1.26769e-24	DEPs	-
AGO3	1.54993e-23	DEPs	-
STRAP	0.0150349	DEPs	DEPs
XPNPEP1	1.0874e-27	DEPs	-
SERPINB4	2.51019e-29	DEPs	DEPs
DNPH1	0.0303445	DEPs	-
CCT4	9.64718e-17	-	DEPs
OMD	3.19107e-24	DEPs	-
SERPINB3	4.64331e-05	DEPs	-
CCDC126	7.4681e-12	DEPs	-
RPL10A	0.0146901	DEPs	DEPs
CDC42	2.34042e-25	DEPs	-
KHSRP	9.51873e-05	DEPs	-
MUC5AC	7.23537e-26	DEPs	-
SLC33A1	2.80214e-26	DEPs	-
CNN1	5.59536e-25	DEPs	-
POLR1E	3.45491e-31	DEPs	DEPs
CORO1C	2.40402e-24	DEPs	-
COX6A1	2.08362e-08	DEPs	-
WAS	0.0463544	-	DEPs
CPNE1	6.50134e-28	DEPs	DEPs
SEPTIN11	1.94134e-10	DEPs	-
UBA7	2.24822e-14	DEPs	-
SEC22B	3.93354e-21	DEPs	DEPs
SP100	2.78047e-14	-	DEPs
ATIC	9.91887e-14	DEPs	DEPs
SELL	0.000993297	DEPs	-
NDRG1	1.68503e-18	DEPs	DEPs
SHMT2	6.75132e-07	DEPs	-
ARPC5	3.04161e-18	DEPs	-
STOM	1.0559e-16	DEPs	DEPs
POLB	0.00148973	DEPs	-
HLA-A	0.000227784	DEPs	-
BCL2L13	5.17523e-25	DEPs	-
PLEC	0.0189997	DEPs	-
ISG15	0.0320702	DEPs	DEPs
ALDH3B1	5.32496e-18	DEPs	-
CASP3	0.00313227	DEPs	-
CCT7	2.11452e-08	DEPs	DEPs
PPIL3	2.14114e-16	DEPs	DEPs
SF3B3	9.40879e-06	DEPs	-
GK	5.04234e-19	DEPs	-
PIP4K2C	7.67427e-21	DEPs	DEPs
CCAR1	3.81856e-21	DEPs	DEPs
CCNL1	0.046281	DEPs	DEPs
GDAP2	0.0164455	DEPs	-
DTNB	2.21813e-20	DEPs	-
NT5E	2.54649e-23	DEPs	DEPs
EEF1AKMT4-ECE2	0.0371749	DEPs	DEPs
COMMD2	1.03749e-22	DEPs	DEPs
ALDH7A1	6.57542e-21	DEPs	-
GGT7	0.00461072	DEPs	-
GK3P	4.2342e-19	DEPs	-
TRAP1	1.84048e-22	-	DEPs
EPHB1	3.95334e-19	DEPs	DEPs
CPSF6	2.84698e-29	-	DEPs
RBM39	1.67129e-16	DEPs	DEPs
APRT	1.02363e-23	DEPs	-
COL15A1	0.0480899	DEPs	DEPs
CTBP1	0.0418114	DEPs	-
ALDH3B2	3.02185e-16	DEPs	-
ERCC5	1.03344e-16	-	DEPs
LMAN1	3.82444e-07	-	DEPs
ST13P5	2.31579e-13	-	DEPs
IPO9	5.40047e-18	-	DEPs
SLC12A4	0.0174999	DEPs	DEPs
EPB42	4.89959e-18	-	DEPs
POLR2B	0.00137155	-	DEPs
SEC23IP	1.74184e-08	-	DEPs
UFL1	2.45375e-22	-	DEPs
HGH1	1.94882e-17	-	DEPs
ARAP1	3.58425e-07	-	DEPs
GSTP1	0.000439546	-	DEPs
BST1	8.53419e-29	-	DEPs
PSMD5	3.52322e-22	-	DEPs
HK3	1.05383e-19	-	DEPs
TRBC1	0.0164455	DEPs	-
SETX	0.0117837	DEPs	DEPs
CLCA1	3.10858e-11	-	DEPs
HAPLN4	0.0128728	-	DEPs
ETFA	3.14757e-06	-	DEPs
TPSD1	0.0253665	-	DEPs
MPG	0.0327699	DEPs	-
RABGGTB	5.98207e-06	-	DEPs
PPIAL4G	0.0189489	-	DEPs
HRAS	6.24524e-13	-	DEPs
PUM1	0.0126184	DEPs	DEPs
ITGA2	2.89241e-13	-	DEPs
KRT33B	1.94456e-23	-	DEPs
KIF5C	2.38583e-24	-	DEPs
CRTAP	7.60879e-23	-	DEPs
TRIM16	5.21284e-20	-	DEPs
HNRNPH1	5.13164e-07	-	DEPs
FCGR2A	3.73446e-23	-	DEPs
MACROD1	0.0253618	-	DEPs
USP15	1.24969e-06	-	DEPs
CTN0.000011	0.000251212	-	DEPs
MFGE8	6.06316e-11	-	DEPs
PDLIM1	1.34645e-07	-	DEPs
KRT4	3.45093e-06	-	DEPs
GBE1	3.20436e-16	-	DEPs
LNPK	2.68235e-17	-	DEPs
DHX38	1.56384e-18	-	DEPs
NUDC	1.42696e-13	-	DEPs
BCAT2	7.13165e-22	-	DEPs
ACSL1	5.94297e-24	-	DEPs
PPP1CB	9.10916e-29	-	DEPs
ARF5	3.59005e-21	-	DEPs
HTRA1	9.18964e-12	-	DEPs
STAU1	8.09052e-11	-	DEPs
NSFL1C	1.37178e-16	-	DEPs
ELOVL1	4.59167e-23	-	DEPs
ACP1	2.12618e-17	-	DEPs
PTGFRN	1.86278e-20	-	DEPs
HDAC1	2.54018e-08	-	DEPs
PSPC1	7.50708e-10	-	DEPs
HLA-C	2.9536e-07	-	DEPs
GBP5	1.45864e-32	-	DEPs
TPR	1.54342e-07	-	DEPs
SYNM	1.09128e-21	-	DEPs
SLC5A3	0.0164455	DEPs	-
RUFY1	0.0120004	-	DEPs
MAP4	2.26902e-13	-	DEPs
POLR2L	4.37198e-25	-	DEPs
SMARCC2	9.36456e-08	-	DEPs
PSMA1	7.12881e-09	-	DEPs
OSTF1	9.70189e-08	DEPs	-
DOCK8	2.66772e-09	-	DEPs
DDAH1	5.91476e-23	-	DEPs
HSPB11	1.00937e-20	-	DEPs
IGFBP7	3.91018e-20	-	DEPs
ARMC8	0.00665157	-	DEPs
H1-5	2.18865e-18	-	DEPs
EXOC8	4.47635e-32	-	DEPs
DPP9	0.00761685	DEPs	DEPs
TGM3	5.42229e-06	DEPs	DEPs
CLMN	1.60485e-25	-	DEPs
PPP1R10	1.01774e-20	-	DEPs
CSE1L	1.80921e-07	DEPs	-
TOM1	1.53499e-16	-	DEPs
TMED2	2.2191e-15	-	DEPs
MRPL50	2.86628e-20	-	DEPs
ATG9A	2.661e-18	-	DEPs
NRIP2	0.0137709	-	DEPs
CPQ	7.18032e-25	-	DEPs
ACTN2	2.40234e-20	-	DEPs
HEBP2	1.51655e-20	-	DEPs
NSDHL	4.48912e-23	-	DEPs
MVB12B	3.12731e-20	-	DEPs
FXR1	8.84183e-06	-	DEPs
COL3A1	0.000671035	DEPs	-
NIFK	0.00986567	DEPs	-
PGRMC1	7.80174e-07	DEPs	-
SERPINB1	2.80136e-05	-	DEPs
PGS1	0.0101742	DEPs	-
MRPL49	4.16308e-18	-	DEPs
TRADD	0.00705952	DEPs	-
FAH	0.047202	-	DEPs
MAP2	2.95847e-26	-	DEPs
ADH1A	2.16318e-29	-	DEPs
ILVBL	3.41945e-22	-	DEPs
RBMX	3.15688e-06	-	DEPs
MDN1	1.76273e-19	-	DEPs
TNFAIP2	3.3382e-05	-	DEPs
PTBP2	3.22066e-10	DEPs	-
EXOC5	0.0217037	DEPs	-
RBM8A	0.0134952	-	DEPs
PABPC1	2.70104e-25	-	DEPs
SEPTIN8	2.62632e-16	-	DEPs
PNO1	1.13175e-23	-	DEPs
ST13	1.70582e-12	-	DEPs
HDGF	1.29013e-10	-	DEPs
CTSH	7.60653e-05	DEPs	-
TXNDC17	2.18885e-25	-	DEPs
CRKL	0.000139915	-	DEPs
EIF3G	2.64282e-25	-	DEPs
ADD2	2.71583e-10	-	DEPs
PAK2	4.62056e-16	-	DEPs
FBLN5	1.67105e-24	-	DEPs
RAB7A	1.05687e-11	-	DEPs
BORCS8	3.8905e-26	-	DEPs
WASF1	9.14681e-12	-	DEPs
TOM1L2	0.0205225	-	DEPs
CYCS	8.13768e-16	-	DEPs
USE1	1.32134e-13	-	DEPs
LCK	0.0491508	DEPs	-
CPNE5	1.4781e-29	-	DEPs
CNRIP1	0.0201795	DEPs	DEPs
KP0.000012	1.23148e-15	DEPs	DEPs
H1-1	5.84713e-22	-	DEPs
PSMD3	6.69202e-17	-	DEPs
KRT37	2.12715e-28	-	DEPs
CALHM5	9.33191e-07	-	DEPs
LEMD2	2.11992e-12	-	DEPs
MGST1	7.03914e-16	-	DEPs
OPA1	1.11052e-13	-	DEPs
PFKL	0.0254526	DEPs	-
CSTA	3.03825e-19	-	DEPs
CCDC6	1.50807e-26	-	DEPs
ALDH6A1	1.09209e-21	-	DEPs
PXN	1.70235e-10	-	DEPs
HDGFL3	4.52723e-08	-	DEPs
PARK7	0.000439507	-	DEPs
LRBA	2.51921e-17	-	DEPs
CASP14	8.98619e-05	-	DEPs
ARFGEF2	3.073e-07	-	DEPs
PRMT1	3.78049e-08	-	DEPs
MXRA5	1.7489e-17	-	DEPs
SCFD1	2.84514e-08	-	DEPs
BSG	1.03617e-16	-	DEPs
PTPRC	0.00802421	-	DEPs
MTARC2	9.10701e-24	-	DEPs
COL4A2	3.79416e-11	-	DEPs
DENND3	0.0346155	DEPs	DEPs
ERAP2	2.60548e-10	-	DEPs
PPIAL4D	0.0189489	-	DEPs
U2AF2	8.62536e-28	-	DEPs
FCGRT	5.24854e-21	-	DEPs
PALM	1.44053e-25	-	DEPs
GTPBP10	0.0164455	DEPs	-
SFXN1	2.33901e-20	-	DEPs
SIRPA	2.29734e-22	-	DEPs
WDR77	1.64762e-18	-	DEPs
ARL6IP5	1.41574e-20	-	DEPs
TNKS1BP1	5.60324e-21	-	DEPs
CD74	2.53878e-18	-	DEPs
HSPA12B	7.3386e-18	-	DEPs
SYTL2	4.45617e-25	-	DEPs
AKR1B1	0.00238582	DEPs	-
SMPDL3B	8.93203e-06	DEPs	-
TRIM28	1.02685e-24	-	DEPs
FKBP15	6.06356e-24	-	DEPs
CDCP1	0.0139075	DEPs	-
NFS1	2.75606e-09	DEPs	-
IDH3G	5.96041e-05	-	DEPs
MAPRE2	2.1076e-23	-	DEPs
SCG3	2.41219e-17	-	DEPs
RNPS1	1.57891e-07	-	DEPs
GLS	0.000166786	-	DEPs
LAMC2	3.36711e-12	-	DEPs
TPM2	1.65728e-27	-	DEPs
LAP3	8.78103e-17	-	DEPs
PRKACA	1.45197e-18	-	DEPs
NFKB1	9.84082e-22	-	DEPs
PCBP2	3.64609e-07	-	DEPs
NUP205	1.55653e-07	-	DEPs
TOP2B	2.56108e-17	-	DEPs
ARCN1	2.10872e-14	-	DEPs
EPHB2	8.06568e-26	-	DEPs
SLC6A11	6.74526e-05	DEPs	-
HNRNPA1	0.0229069	-	DEPs
COMT	2.41485e-26	-	DEPs
SQOR	0.000129159	-	DEPs
CHMP4A	3.47266e-24	-	DEPs
ATP1A3	2.95332e-09	-	DEPs
MATR3	1.01134e-06	-	DEPs
D0.00001JB1	3.90516e-11	-	DEPs
FBP2	0.000210939	DEPs	-
DAP3	0.0136877	-	DEPs
H1-6	1.55636e-21	-	DEPs
MARK1	0.00409247	DEPs	-
USP32	0.00315465	DEPs	-
ACTR1A	9.60254e-06	DEPs	-
0.00001GA	2.5313e-11	-	DEPs
MTTP	3.39536e-25	-	DEPs
PARP14	2.49868e-09	-	DEPs
CORO1B	1.42535e-07	-	DEPs
FES	8.35023e-23	-	DEPs
PRPF6	4.45523e-24	-	DEPs
TWF2	1.80197e-10	-	DEPs
RPL22	7.31632e-23	-	DEPs
FER1L4	2.0083e-14	-	DEPs
SPEN	1.90262e-18	-	DEPs
GALM	2.68026e-29	-	DEPs
ACO1	1.96512e-07	-	DEPs
ARFGAP2	9.53498e-25	-	DEPs
NDUFB6	9.67448e-12	-	DEPs
NUB1	0.000165824	DEPs	-
SKIV2L	6.97081e-15	-	DEPs
PSMC1	2.53066e-07	-	DEPs
TFG	6.06287e-08	-	DEPs
EPHX2	5.05736e-10	-	DEPs
FERMT2	3.92668e-09	-	DEPs
C2CD5	3.79338e-17	-	DEPs
ARPC2	3.76243e-05	DEPs	-
PML	5.82226e-27	-	DEPs
PLX0.000014	0.0444283	-	DEPs
KRT73	7.59341e-05	-	DEPs
RPL21	1.32587e-20	-	DEPs
RAP1B	1.64945e-16	-	DEPs
CYGB	0.0102581	-	DEPs
CBL	0.00577742	-	DEPs
ALDH3A1	8.45066e-14	-	DEPs
CALU	1.03366e-18	-	DEPs
GP1BB	0.033939	DEPs	-
G0.00001Q	7.37992e-24	-	DEPs
HADH	1.18371e-08	DEPs	-
SH3YL1	0.0221058	DEPs	DEPs
SCARB2	2.24379e-11	-	DEPs
MAPK3	8.2504e-24	-	DEPs
HDAC2	1.55406e-28	-	DEPs
CRYZ	3.00955e-09	-	DEPs
RAB6D	1.5606e-14	-	DEPs
SORD	1.39655e-19	-	DEPs
VAMP3	2.32382e-24	-	DEPs
RAB1C	9.42965e-14	-	DEPs
DST	7.91076e-20	-	DEPs
D2HGDH	0.033559	-	DEPs
MTMR2	7.99303e-09	DEPs	-
VCL	0.00301847	-	DEPs
CDC42EP5	0.00915229	-	DEPs
WASH2P	0.0497954	-	DEPs
TTN	3.14394e-18	-	DEPs
PDS5A	3.78601e-05	-	DEPs
HNRNPA3	7.01595e-20	-	DEPs
PDE10A	0.017769	DEPs	-
RAD21	1.27964e-29	-	DEPs
XYLB	5.80569e-28	-	DEPs
SUPT6H	2.91081e-23	-	DEPs
GSK3A	3.33143e-06	-	DEPs
GIPC1	8.36647e-09	-	DEPs
CLNS1A	0.0244031	-	DEPs
UBR7	1.22763e-28	-	DEPs
RANBP2	4.43523e-12	-	DEPs
CAST	6.20858e-24	-	DEPs
UNC45A	3.12168e-17	-	DEPs
KRT32	1.87305e-26	-	DEPs
FARP1	1.3367e-23	-	DEPs
TUT1	7.14426e-25	-	DEPs
RAB1B	1.36173e-07	-	DEPs
RGN	3.76868e-10	-	DEPs
HEPH	1.11483e-13	-	DEPs
COPS7A	3.17279e-10	-	DEPs
LMNB2	7.46313e-05	-	DEPs
ROCK2	2.2364e-07	-	DEPs
FAM98A	2.74181e-23	-	DEPs
RAD23B	5.93123e-13	-	DEPs
HSPD1	4.28961e-06	-	DEPs
MZB1	2.83535e-19	-	DEPs
SRP72	8.27275e-24	-	DEPs
MFN2	1.15944e-23	-	DEPs
TM9SF1	0.035713	DEPs	DEPs
GLG1	4.59921e-17	-	DEPs
SF3A3	4.6407e-09	-	DEPs
NFYA	2.43539e-16	-	DEPs
NFATC1	0.0200774	DEPs	-
IGFBP2	2.88126e-24	-	DEPs
ADD1	1.15115e-15	-	DEPs
ANP32A	3.94569e-14	-	DEPs
VIRMA	0.00344836	-	DEPs
PTGES3	0.0129286	DEPs	-
ICAM2	6.95289e-17	-	DEPs
SH3GL1	9.0126e-20	-	DEPs
PKP2	6.47405e-07	-	DEPs
PUS1	0.030515	-	DEPs
TRIP10	9.85764e-27	-	DEPs
TP53I3	5.40984e-07	-	DEPs
GOLGB1	3.23021e-28	-	DEPs
NELFA	2.49941e-24	-	DEPs
PPIAL4H	0.0189489	-	DEPs
CAPN2	8.16109e-24	-	DEPs
UGT1A7	9.10299e-27	-	DEPs
SERPI0.0000111	2.46243e-06	-	DEPs
ZBTB7A	0.0164455	DEPs	-
AATF	0.0405185	-	DEPs
MYDGF	5.60591e-18	-	DEPs
TRBC2	0.0164455	DEPs	-
RPL9	1.16208e-18	-	DEPs
CDC37	3.68065e-16	-	DEPs
RBMXL2	9.1539e-07	-	DEPs
PDIA6	7.02337e-07	-	DEPs
PTPRJ	5.46284e-08	-	DEPs
CRYL1	4.71518e-15	-	DEPs
SLC27A2	6.40652e-20	-	DEPs
HARS2	4.69389e-11	-	DEPs
WRNIP1	1.28786e-11	-	DEPs
HEXA	1.09008e-16	DEPs	DEPs
REG4	0.016426	-	DEPs
USP39	3.2528e-20	-	DEPs
AAK1	1.5806e-21	-	DEPs
ABLIM1	0.0326073	-	DEPs
AGR2	2.4314e-14	-	DEPs
AP5B1	0.0140619	DEPs	DEPs
HDLBP	0.00209345	-	DEPs
RPS12	0.0384957	DEPs	-
ACTN3	1.62473e-21	-	DEPs
ADD3	1.22477e-05	-	DEPs
MTM1	3.06013e-14	-	DEPs
LAMP1	1.92564e-10	DEPs	-
ANGPTL3	7.80447e-24	-	DEPs
MYO6	1.27959e-23	-	DEPs
MYO1C	2.45964e-08	-	DEPs
SOD3	2.94517e-05	-	DEPs
SUFU	0.0244265	-	DEPs
CCT2	2.5192e-15	-	DEPs
SFTPA2	0.0430215	-	DEPs
PLXNB1	2.4536e-24	-	DEPs
TOMM40L	0.0483908	-	DEPs
JAK1	0.0165271	DEPs	-
GALNT11	0.0140744	DEPs	-
MERTK	4.83486e-23	-	DEPs
MRPS18A	1.40946e-13	-	DEPs
ASPH	1.74807e-22	-	DEPs
CPA2	5.55651e-24	-	DEPs
KIAA1217	3.50802e-23	-	DEPs
RIF1	1.08915e-15	-	DEPs
ATP6AP1	2.5239e-25	-	DEPs
DDAH2	7.99866e-10	-	DEPs
RRS1	3.7395e-21	-	DEPs
SESN2	0.0147128	DEPs	-
DYNLRB1	1.70187e-25	-	DEPs
LASP1	2.47946e-15	-	DEPs
B4GAT1	2.74762e-18	-	DEPs
PRNP	8.65493e-15	-	DEPs
PTGIS	0.0235912	-	DEPs
ATP5PF	1.26217e-22	-	DEPs
MVP	0.000720859	-	DEPs
0.00001DK2	0.0121564	DEPs	-
LMAN2	3.10796e-08	-	DEPs
PGK2	6.3963e-11	-	DEPs
HNRNPF	4.52551e-05	-	DEPs
PREB	2.70763e-30	-	DEPs
PPIL4	0.0147543	DEPs	-
RING1	0.0192531	-	DEPs
SYK	2.40822e-24	-	DEPs
ENDOD1	1.3749e-18	-	DEPs
SACM1L	1.44925e-26	-	DEPs
HPRT1	6.64371e-15	-	DEPs
NUP37	0.00442081	DEPs	DEPs
EEF1AKMT4	0.00577602	DEPs	-
ABRAXAS2	0.0164455	DEPs	-
SPARCL1	0.0486911	-	DEPs
WASHC2A	5.34454e-23	-	DEPs
PKN1	0.0192883	-	DEPs
EIF2AK4	0.0178355	-	DEPs
PNPLA6	0.00218872	DEPs	DEPs
TAB1	0.00166162	DEPs	-
NRCAM	5.17569e-21	-	DEPs
NES	1.59752e-25	-	DEPs
EIF3K	0.0351155	-	DEPs
PPIE	8.78834e-22	-	DEPs
MMRN1	1.65821e-21	-	DEPs
UBE2V2	1.952e-05	-	DEPs
GTF3C1	0.0231165	-	DEPs
PYGM	1.74373e-15	-	DEPs
SLC50A1	0.0164455	DEPs	-
WBP11	0.00715862	-	DEPs
CES1	1.97225e-12	-	DEPs
ACSM2B	2.75469e-20	-	DEPs
APP	2.10411e-23	-	DEPs
ATP13A1	3.15789e-15	-	DEPs
CASTOR2	0.0344533	-	DEPs
NLGN3	0.000484907	DEPs	DEPs
PAPSS2	3.60614e-19	-	DEPs
ALDH3A2	5.47226e-10	-	DEPs
BHMT	4.68896e-14	-	DEPs
QDPR	9.50106e-23	-	DEPs
S0.00001P29	0.0154714	DEPs	DEPs
MAPRE1	4.0011e-14	-	DEPs
GPC4	0.0362172	DEPs	-
AKR7A3	5.33468e-22	-	DEPs
ALYREF	0.000496278	-	DEPs
CDSN	9.26977e-07	-	DEPs
SSRP1	8.47992e-28	-	DEPs
FTH1	1.24877e-14	-	DEPs
MUC5B	3.62319e-20	-	DEPs
D0.00001JC11	3.62979e-18	-	DEPs
ABCC2	1.95873e-20	-	DEPs
KIT	5.87526e-07	-	DEPs
SPAG9	3.84447e-11	-	DEPs
ANTXR1	7.19687e-15	-	DEPs
FDX1	5.17428e-17	-	DEPs
CSNK2B	0.0275371	-	DEPs
GALNT2	7.47108e-27	-	DEPs
STK3	9.87593e-24	-	DEPs
MRPS9	6.61271e-19	-	DEPs
MPV17	0.00383996	DEPs	DEPs
HSP90AA5P	6.11531e-07	-	DEPs
PRKACB	0.000289974	-	DEPs
WASHC2C	2.32985e-23	-	DEPs
YES1	2.52015e-15	-	DEPs
CD14	0.00907126	DEPs	-
COPS6	5.13988e-06	-	DEPs
ALG5	0.0158235	-	DEPs
AGPAT5	0.0283453	DEPs	-
TMEM68	7.88525e-16	-	DEPs
ADA2	1.60404e-20	-	DEPs
EIF5B	5.24489e-17	-	DEPs
NIBAN2	2.1713e-16	-	DEPs
DKK3	1.25267e-17	-	DEPs
0.0001	2.70929e-08	-	DEPs
MCM7	1.28536e-23	-	DEPs
CTPS1	1.56462e-18	-	DEPs
SYNCRIP	7.69232e-07	-	DEPs
DNM2	8.34413e-26	-	DEPs
FUCA1	1.46766e-06	-	DEPs
DARS1	3.87896e-16	-	DEPs
CLPX	1.67234e-18	-	DEPs
ARSD	1.2234e-15	-	DEPs
GGCT	2.3715e-07	-	DEPs
OTUB1	3.6438e-07	DEPs	-
PRPSAP2	5.86225e-21	-	DEPs
LOXL4	7.59494e-23	-	DEPs
MRPS15	2.28733e-23	-	DEPs
ADPGK	2.13977e-12	-	DEPs
DNM1L	9.75443e-23	-	DEPs
GGA3	0.0164455	DEPs	-
PRELP	0.027551	-	DEPs
TRIM16L	1.40149e-22	-	DEPs
EVPL	5.99115e-07	-	DEPs
CAPZB	1.62478e-17	-	DEPs
PLOD1	1.7005e-23	-	DEPs
MEF2D	1.46902e-12	-	DEPs
CTNND2	3.67945e-23	-	DEPs
GALK1	4.47719e-22	-	DEPs
CDH13	2.34567e-23	-	DEPs
CROCC	2.12813e-27	DEPs	-
STAM	3.75942e-15	-	DEPs
PTPN11	7.95979e-20	-	DEPs
ANXA13	0.0147805	-	DEPs
RFTN1	3.45214e-24	-	DEPs
HLA-E	1.38115e-07	-	DEPs
WDR1	0.000908389	DEPs	DEPs
AFG3L2	1.22634e-19	-	DEPs
SWAP70	5.99446e-22	-	DEPs
QARS1	0.00106299	-	DEPs
CASP8	7.14181e-19	-	DEPs
DHX30	9.06117e-22	-	DEPs
PPP2R1B	3.96193e-16	-	DEPs
CHGA	7.53018e-11	DEPs	-
SUN1	9.88027e-22	-	DEPs
DDX42	1.58829e-10	-	DEPs
VPS39	6.4808e-30	-	DEPs
UBE2L5	3.13518e-18	DEPs	-
INF2	8.6025e-17	-	DEPs
SNRPD1	2.13055e-23	-	DEPs
CD2AP	1.69238e-24	-	DEPs
CWC27	3.55855e-19	-	DEPs
COASY	0.00327364	DEPs	-
ZSWIM8	1.43554e-33	-	DEPs
ARG1	2.44572e-18	-	DEPs
MEGF8	4.40076e-11	-	DEPs
PDS5B	1.12669e-25	-	DEPs
TXNL1	1.27699e-09	-	DEPs
VDAC1	2.32244e-06	-	DEPs
ICOSLG	4.08517e-07	-	DEPs
LAMC1	4.20342e-05	DEPs	-
LRRC47	7.17499e-08	-	DEPs
NMRAL1	1.58955e-09	-	DEPs
LRCH2	0.0382841	-	DEPs
TSPO	0.0106619	DEPs	DEPs
MFAP4	6.43318e-21	-	DEPs
EPB41	4.04547e-30	-	DEPs
PTPRS	4.21071e-21	-	DEPs
CREG1	0.0365465	-	DEPs
DDRGK1	3.33046e-25	-	DEPs
CDH1	0.00142828	-	DEPs
PTGR1	9.1411e-22	-	DEPs
IFIT1	1.81571e-16	-	DEPs
CAD	0.044538	-	DEPs
FNDC3A	9.32437e-25	-	DEPs
AP3D1	9.50864e-26	-	DEPs
TXNDC11	0.0164455	DEPs	-
PA2G4	5.26144e-23	-	DEPs
RAB6C	1.11846e-14	-	DEPs
COX2	2.22739e-15	-	DEPs
TMEM179B	0.0254025	DEPs	-
ART3	4.69908e-08	-	DEPs
MYO1G	1.6355e-30	-	DEPs
FAM114A1	1.69187e-18	-	DEPs
WASH3P	0.0497954	-	DEPs
P4HB	0.00566036	-	DEPs
DCTN5	0.000139179	DEPs	-
DDR1	1.4715e-10	-	DEPs
H3-4	1.00733e-16	-	DEPs
CYP2J2	0.0385712	DEPs	-
ARMCX2	0.0050851	DEPs	DEPs
HCLS1	2.92703e-20	-	DEPs
DERPC	3.03594e-21	DEPs	-
CELA2B	0.0049768	DEPs	-
ITLN2	0.0294387	DEPs	DEPs
MICOS10	0.0127285	DEPs	-
OLIG2	0.0164455	DEPs	-
RCAN2	0.0164455	DEPs	-
SULT1B1	3.37291e-15	DEPs	-
HYAL1	0.0142446	DEPs	DEPs
PPAN	0.0123025	DEPs	DEPs
CASC4	0.0470264	DEPs	DEPs
CDCA7	0.0122346	DEPs	-
CDK11A	7.39317e-29	-	DEPs
CDK11B	7.39317e-29	-	DEPs
GPA33	4.43525e-17	-	DEPs
H3C1	2.13595e-16	-	DEPs
H3C15	3.34238e-17	-	DEPs
IMPAD1	0.0193768	-	DEPs
LCN1	6.11429e-31	-	DEPs
LCN1P1	6.15673e-33	-	DEPs
PPIAL4A	0.0189489	-	DEPs
PPIAL4C	0.0189489	-	DEPs
PPIAL4E	0.0189489	-	DEPs
PPIAL4F	0.0189489	-	DEPs
SMN1	1.31851e-22	-	DEPs
ST13P4	3.07504e-12	-	DEPs
UGT2B17	0.0040365	-	DEPs
WASHC1	0.0497954	-	DEPs

## Sheet: Table S4B
Table S4B : Z-scored intensities were calculated for 1313 DEPs during the progression of BC in serum.
	HC	DCIS	MI	IDC	Met	protein_cluster
GCSH	1.77813	-0.555062	-0.305117	-0.370226	-0.547723	1
BRIX1	1.77697	-0.416876	-0.270706	-0.575806	-0.513581	1
CELA3A	1.74035	-0.411993	-0.734038	-0.504554	-0.0897643	1
WASHC5	1.78838	-0.459818	-0.478058	-0.429289	-0.421218	1
SLC9A3R1	1.77837	-0.264149	-0.479624	-0.55197	-0.482624	1
EXOC1	1.73989	-0.6695	-0.615792	-0.0823366	-0.372261	1
NCF1	1.7626	-0.624608	-0.300716	-0.594936	-0.242339	1
OLFM4	1.78407	-0.396147	-0.401292	-0.414628	-0.572008	1
SLC3A2	1.72718	-0.337575	-0.866016	-0.350798	-0.172789	1
VAMP7	1.77749	-0.547294	-0.25642	-0.510572	-0.463205	1
SEPTIN10	1.77755	-0.586313	-0.413612	-0.281301	-0.496327	1
LBR	1.7551	-0.577699	-0.602287	-0.457514	-0.117598	1
DMPK	1.783	-0.517669	-0.529441	-0.398446	-0.337443	1
SLC12A2	1.74111	-0.603667	-0.688824	-0.103887	-0.344735	1
CC2D1A	1.78693	-0.399006	-0.512011	-0.407	-0.468911	1
G0.00001T3	1.77649	-0.576097	-0.29609	-0.540623	-0.363677	1
GP6	1.7886	-0.4721	-0.452422	-0.4352	-0.42888	1
SULT1A1	1.75393	-0.133702	-0.557187	-0.65477	-0.408268	1
MAP2K2	1.76795	-0.586756	-0.576303	-0.215842	-0.389049	1
WDR36	1.78873	-0.447141	-0.455657	-0.427993	-0.457939	1
CDH6	1.78825	-0.489884	-0.427412	-0.425229	-0.445726	1
KEAP1	1.78281	-0.513845	-0.461617	-0.307299	-0.500044	1
KP0.000015	1.76715	-0.309363	-0.621264	-0.267212	-0.569309	1
GDPD1	1.78861	-0.449333	-0.47271	-0.437581	-0.428989	1
VPS8	1.77752	-0.304952	-0.594634	-0.504004	-0.373929	1
ITGAM	1.78568	-0.528262	-0.380651	-0.477228	-0.399543	1
CDC123	1.77659	-0.526437	-0.242555	-0.495626	-0.511973	1
PLCD3	1.73664	-0.221791	-0.170436	-0.639671	-0.704743	1
G0.00001T2	1.77632	-0.574093	-0.294277	-0.544338	-0.363609	1
TNXA	1.74737	-0.803278	-0.313877	-0.268432	-0.361779	1
DLAT	1.78836	-0.455854	-0.414799	-0.438528	-0.479176	1
FCHSD1	1.78883	-0.450634	-0.437758	-0.448784	-0.451651	1
G0.00001L	1.77691	-0.566139	-0.296956	-0.547412	-0.366399	1
PRORP	1.77473	-0.516093	-0.516093	-0.226451	-0.516093	1
CES2	1.78778	-0.456931	-0.473532	-0.387869	-0.469448	1
LAMTOR2	1.76957	-0.45603	-0.660386	-0.401516	-0.25164	1
ATAD1	1.77643	-0.274535	-0.60675	-0.456542	-0.438598	1
GLA	1.78679	-0.513784	-0.407343	-0.395335	-0.470323	1
TMED9	1.78669	-0.515824	-0.462563	-0.381735	-0.426572	1
VWA1	1.77603	-0.503172	-0.248345	-0.45724	-0.567271	1
IFI16	1.78724	-0.485015	-0.466318	-0.46112	-0.374783	1
DPP7	1.77459	-0.480623	-0.229619	-0.513527	-0.55082	1
PSIP1	1.76484	-0.345506	-0.723942	-0.355067	-0.34032	1
SLC25A42	1.78869	-0.442346	-0.459577	-0.427191	-0.459577	1
VPS35	1.78318	-0.370185	-0.560152	-0.372626	-0.480218	1
RPS6	1.78251	-0.491879	-0.300967	-0.509468	-0.480193	1
CBR3	1.58163	0.196008	-0.835634	-0.0722122	-0.86979	1
FLG2	1.78874	-0.439946	-0.437562	-0.465833	-0.445403	1
AP1B1	1.78722	-0.388026	-0.506889	-0.456725	-0.435583	1
ACAD8	1.78367	-0.508866	-0.498091	-0.458473	-0.318243	1
SMPD4	1.77836	-0.525511	-0.500315	-0.258346	-0.494187	1
SULT1A4	1.78768	-0.466641	-0.385701	-0.478619	-0.456721	1
KRAS	1.67503	-0.708774	0.17827	-0.521499	-0.623029	1
CZIB	1.78711	-0.451774	-0.389698	-0.512495	-0.433145	1
PPIG	1.78823	-0.477156	-0.437051	-0.465228	-0.408793	1
RETREG2	1.78325	-0.574721	-0.378686	-0.446318	-0.38353	1
IGLV5-45	1.73633	-0.629173	-0.623733	-0.445915	-0.037513	1
TBCA	1.77647	-0.572415	-0.524755	-0.267564	-0.411739	1
CMPK1	1.78186	-0.468768	-0.567917	-0.322253	-0.42292	1
CMBL	1.78204	-0.44758	-0.530667	-0.500237	-0.30356	1
PDK1	1.76579	-0.417483	-0.334782	-0.709266	-0.304255	1
ATP12A	1.78876	-0.444084	-0.432006	-0.457419	-0.455254	1
PIP	1.76832	-0.600068	-0.480403	-0.192901	-0.494946	1
MISP	1.7543	-0.693793	-0.430879	-0.483935	-0.145694	1
DSTN	1.78258	-0.363618	-0.572563	-0.377536	-0.468862	1
ALAD	1.77422	-0.608821	-0.51522	-0.276837	-0.373343	1
NUCB1	1.78282	-0.465657	-0.554082	-0.438871	-0.324208	1
CUL3	1.78431	-0.47755	-0.511898	-0.325872	-0.46899	1
UPF1	1.786	-0.44833	-0.364782	-0.52454	-0.448343	1
DCTN4	1.78463	-0.400762	-0.548718	-0.465873	-0.369274	1
PSMB7	1.73443	-0.703609	-0.610228	-0.344178	-0.0764174	1
MAP1S	1.76913	-0.446742	-0.588236	-0.533049	-0.201102	1
NCF1B	1.76344	-0.621831	-0.303523	-0.59267	-0.245414	1
NUFIP2	1.78067	-0.507878	-0.279968	-0.499627	-0.493202	1
POLG2	1.78853	-0.459805	-0.459805	-0.454307	-0.414617	1
PTPRZ1	1.78615	-0.364257	-0.432087	-0.480594	-0.509216	1
ITGA1	1.77997	-0.551994	-0.308204	-0.527025	-0.392749	1
PEX1	1.78825	-0.485826	-0.424957	-0.455693	-0.421773	1
PDK2	1.76526	-0.409923	-0.358746	-0.711038	-0.285554	1
SHMT1	1.78405	-0.530874	-0.328827	-0.459534	-0.464811	1
CRISP3	1.78091	-0.472039	-0.285115	-0.501799	-0.521959	1
SF1	1.75267	-0.577082	-0.686233	-0.292011	-0.197343	1
CUL1	1.75195	-0.361122	-0.739533	-0.182046	-0.469254	1
DHX9	1.76683	-0.652873	-0.514942	-0.360654	-0.238365	1
IL6ST	1.76579	-0.562159	-0.609304	-0.202032	-0.392294	1
ACAD10	1.78883	-0.443941	-0.455191	-0.441338	-0.44836	1
DPEP2	1.77356	-0.400407	-0.491303	-0.619734	-0.262118	1
KLK10	1.77643	-0.319249	-0.344895	-0.507035	-0.605254	1
FLOT1	1.76395	-0.485067	-0.184862	-0.445542	-0.648476	1
GNPAT	1.78874	-0.438745	-0.466164	-0.443941	-0.439894	1
POLR2C	1.78751	-0.489781	-0.432191	-0.390501	-0.475033	1
SGCE	1.75069	-0.493325	-0.105409	-0.668496	-0.483457	1
KP0.000016	1.74888	-0.305888	-0.666649	-0.162236	-0.614103	1
CSTF1	1.65492	-0.88362	-0.228238	-0.646302	0.103239	1
SP140L	1.78856	-0.468514	-0.43204	-0.461719	-0.426283	1
ZCRB1	1.77316	-0.606011	-0.299588	-0.327578	-0.539985	1
TMEM33	1.77816	-0.517731	-0.266907	-0.548397	-0.445122	1
AP3B1	1.78303	-0.362795	-0.43613	-0.577917	-0.406187	1
AKR1C4	1.78871	-0.434637	-0.467668	-0.439263	-0.447144	1
CCNK	1.78383	-0.504746	-0.317404	-0.480319	-0.481366	1
RIC8A	1.78583	-0.472178	-0.485194	-0.34615	-0.482309	1
USP11	1.786	-0.379989	-0.522888	-0.406579	-0.476544	1
TGFB1	1.78849	-0.418697	-0.458059	-0.47268	-0.43905	1
PDK4	1.76517	-0.406843	-0.355008	-0.712959	-0.29036	1
DOCK1	1.75893	-0.276778	-0.748005	-0.350199	-0.383946	1
HDGFL2	1.7712	-0.350139	-0.684476	-0.383477	-0.353109	1
NCAN	1.78028	-0.472018	-0.294986	-0.567512	-0.445766	1
HNRNPA1L2	1.78526	-0.516199	-0.343336	-0.464984	-0.460744	1
PVR	1.78743	-0.481882	-0.489836	-0.419481	-0.396227	1
SLC44A2	1.78837	-0.41465	-0.478917	-0.439972	-0.454829	1
TWF1	1.78463	-0.332667	-0.515991	-0.458671	-0.477297	1
CNN3	1.74328	-0.749702	-0.296607	-0.532962	-0.164009	1
OAS3	1.78773	-0.482889	-0.476395	-0.394983	-0.43346	1
SUB1	1.7846	-0.51895	-0.368796	-0.386374	-0.510481	1
SNX4	1.78434	-0.44492	-0.562332	-0.386493	-0.390599	1
GID8	1.78838	-0.47137	-0.40963	-0.449949	-0.457434	1
KP0.000011	1.75303	-0.275973	-0.656552	-0.206449	-0.614051	1
DOCK10	1.743	-0.551635	-0.426417	-0.685178	-0.0797671	1
VPS18	1.77827	-0.5163	-0.258527	-0.480472	-0.522973	1
RECK	1.76814	-0.3881	-0.700515	-0.312731	-0.366794	1
ABCF3	1.78419	-0.568795	-0.403359	-0.425447	-0.386584	1
PIGS	1.77663	-0.628093	-0.304715	-0.431929	-0.411897	1
TACO1	1.76897	-0.188522	-0.566328	-0.495512	-0.518605	1
MVK	1.7417	-0.48845	-0.602294	-0.0486672	-0.602294	1
RARRES1	1.65051	-0.693782	-0.693782	-0.504681	0.241733	1
N4BP2L1	1.77486	-0.515801	-0.515801	-0.227453	-0.515801	1
NOP16	1.62355	-0.357651	-0.840659	0.255906	-0.68115	1
IRF4	1.38434	-0.881282	0.733806	-0.660502	-0.576367	1
TMEM128	1.5344	0.427299	-0.757262	-0.315636	-0.8888	1
EMC8	1.41835	-1.00387	-0.212618	0.57544	-0.777296	1
TRMT10C	1.70484	-0.162887	-0.44987	-0.179776	-0.912304	1
CLN5	1.45087	-0.787487	-0.644464	-0.664948	0.646032	1
CHURC1	1.51169	-0.261441	-1.18945	0.308572	-0.369364	1
DNMT3A	1.76301	-0.513441	-0.148543	-0.550511	-0.550511	1
PGGT1B	1.78885	-0.447214	-0.447214	-0.447214	-0.447214	1
BPNT1	1.63042	-0.655033	-0.655033	0.304744	-0.625092	1
DNTTIP2	1.58978	-0.957603	-0.736471	-0.0102094	0.114507	1
PRDX3	1.4296	-0.857729	-0.919022	-0.223719	0.570869	1
SNX30	1.25413	-0.866712	-0.608239	-0.690101	0.910927	1
BSN	1.13608	-0.728345	-0.742613	-0.718927	1.05381	1
THOC1	1.74547	-0.619285	-0.619285	-0.423495	-0.0834052	1
SRPK2	1.61319	-0.652802	-0.652802	-0.652802	0.345218	1
FIP1L1	0.984969	0.780651	-1.09185	-1.04446	0.370682	1
SBF1	1.53867	-0.428916	-0.848637	0.45861	-0.71973	1
ALPG	1.78675	-0.474682	-0.474682	-0.362704	-0.474682	1
SARDH	1.63509	-0.728863	-0.728863	-0.441018	0.263658	1
DPY19L1	1.78885	-0.447214	-0.447214	-0.447214	-0.447214	1
GMFB	1.78698	-0.470103	-0.506358	-0.425742	-0.384776	1
ISCU	1.78885	-0.447214	-0.447214	-0.447214	-0.447214	1
PES1	1.41247	0.558745	-1.09536	-0.671783	-0.204071	1
STK10	1.78038	-0.277021	-0.505901	-0.491558	-0.505901	1
CIAPIN1	1.78729	-0.485761	-0.429513	-0.485761	-0.386253	1
COL7A1	0.808792	-1.05894	0.658429	-1.12816	0.71988	1
TMPRSS11E	1.65947	-0.630446	-0.630446	-0.630446	0.231863	1
EARS2	1.69845	-0.285423	-0.901779	-0.467639	-0.0436124	1
MMP3	0.816028	-1.26526	0.63011	-0.902784	0.721908	1
SLIT3	1.7445	-0.186738	-0.763638	-0.288935	-0.50519	1
ELMOD2	1.5962	-0.763933	0.341743	-0.410079	-0.763933	1
FOXO3	1.76592	-0.53363	-0.53363	-0.165033	-0.53363	1
OXLD1	1.31621	0.759867	-1.01422	-0.752031	-0.309835	1
TREH	1.11744	-0.598097	-0.895161	-0.684351	1.06017	1
NTM	1.73521	-0.611297	-0.300948	-0.106405	-0.716562	1
TBC1D10A	1.70633	-0.599923	-0.599923	-0.599923	0.0934419	1
ZC3HC1	1.65582	-0.190014	-0.77899	0.0921723	-0.77899	1
ARMC5	1.75756	-0.474011	-0.698751	-0.408678	-0.176122	1
FABP7	1.76741	-0.530981	-0.530981	-0.174468	-0.530981	1
SCGN	1.39916	-0.0719913	-1.12771	-0.710289	0.510831	1
TBC1D13	1.75931	-0.600768	-0.600768	-0.396031	-0.161739	1
TG	1.78096	-0.499415	-0.282715	-0.499415	-0.499415	1
PPM1B	1.76888	-0.382838	-0.228779	-0.542952	-0.614308	1
SPATA5	1.6006	-0.565687	-0.79617	0.35796	-0.596704	1
AP1M2	1.77141	-0.629973	-0.444028	-0.237148	-0.460261	1
ANXA11	1.74485	-0.446272	-0.709	-0.494595	-0.0949861	1
ALPP	1.78675	-0.474682	-0.474682	-0.362704	-0.474682	1
G0.00001T1	1.77666	-0.569029	-0.29534	-0.546536	-0.36575	1
NCF1C	1.75879	-0.651363	-0.285389	-0.58861	-0.233424	1
PDGFB	1.63012	-0.501897	-1.03447	-0.137133	0.0433838	1
PNLIPRP1	1.7823	-0.449602	-0.570134	-0.433547	-0.329017	1
SULT1A3	1.78768	-0.466641	-0.385701	-0.478619	-0.456721	1
CCL18	1.5244	-0.256112	-0.983283	0.406662	-0.691664	1
CELA3B	1.29317	-0.439396	-0.984186	-0.695557	0.825973	1
RBBP7	1.62023	0.0298161	-1.10603	-0.308569	-0.235454	1
0.00001PB	1.78604	-0.478858	-0.349469	-0.478858	-0.478858	1
TGM1	0.827283	0.346603	-1.63594	-0.223067	0.685126	1
RBBP4	1.50988	0.0352431	-1.04752	0.250153	-0.747755	1
TGFB1I1	1.56685	-0.996489	-0.538033	-0.378101	0.345775	1
SLK	1.78833	-0.408056	-0.474537	-0.453807	-0.45193	1
LTBP4	1.7844	-0.328235	-0.475995	-0.464952	-0.515213	1
ELAC2	1.78863	-0.423652	-0.44189	-0.45843	-0.464656	1
OSBP	1.7866	-0.416318	-0.522664	-0.38964	-0.457978	1
AK1	1.76401	-0.538107	-0.650894	-0.357223	-0.217789	1
WDFY1	1.7854	-0.422683	-0.504098	-0.355236	-0.503379	1
TXNIP	1.78847	-0.45708	-0.4764	-0.426115	-0.428873	1
GCC2	1.73709	-0.669844	-0.143102	-0.254298	-0.669844	1
NDUFS1	1.76071	-0.707033	-0.45027	-0.21447	-0.388935	1
CEACAM6	1.77438	-0.587843	-0.48749	-0.459122	-0.239928	1
RCL1	1.77778	-0.542084	-0.255731	-0.484085	-0.495882	1
ACAN	1.76911	-0.203773	-0.605748	-0.45351	-0.506081	1
BCAN	1.78219	-0.432072	-0.344476	-0.582794	-0.422848	1
PRTN3	1.78591	-0.543069	-0.434475	-0.410676	-0.397695	1
FDPS	1.78301	-0.345502	-0.570525	-0.424739	-0.44225	1
GARS1	1.78756	-0.421311	-0.507754	-0.409397	-0.449102	1
ARHGAP25	1.78361	-0.314855	-0.49405	-0.503277	-0.471425	1
ACLY	1.63485	-0.491875	0.0876293	-0.21503	-1.01558	1
HSP90AA2P	1.78388	-0.466922	-0.551883	-0.418116	-0.346953	1
DRG1	1.66023	-0.967057	-0.456507	0.0714692	-0.308131	1
FHOD1	1.7793	-0.266091	-0.503137	-0.506901	-0.503173	1
DDX58	1.77293	-0.245023	-0.481841	-0.429767	-0.616297	1
GPRC5C	1.77164	-0.579374	-0.512277	-0.466459	-0.213534	1
RPL8	1.76768	-0.636671	-0.223098	-0.390546	-0.517363	1
GLB1	1.31157	-1.14499	0.681935	-0.156151	-0.692366	1
MMP10	1.65466	-0.729591	0.235944	-0.588752	-0.572265	1
BLOC1S4	1.78129	-0.45592	-0.584785	-0.332017	-0.408569	1
PACSIN2	1.5844	0.386468	-0.60577	-0.826812	-0.538284	1
BANF1	1.71946	-0.0538313	-0.557796	-0.313332	-0.794503	1
0.00001P1L4	1.78341	-0.31886	-0.445688	-0.502321	-0.516541	1
ATPAF1	1.68225	-0.871132	-0.61498	-0.0151952	-0.180941	1
DENND4C	1.78455	-0.46983	-0.32821	-0.480626	-0.505884	1
D0.00001JC13	1.78807	-0.496414	-0.443861	-0.421674	-0.426116	1
BIRC6	1.72848	-0.12858	-0.683176	-0.691707	-0.225018	1
RAB22A	1.78885	-0.447214	-0.447214	-0.447214	-0.447214	1
MLYCD	1.76797	-0.338952	-0.653985	-0.262283	-0.512748	1
ORC3	1.23732	0.898002	-0.868451	-0.403286	-0.863587	1
ISG15	1.72595	-0.8559	-0.172966	-0.436978	-0.260108	1
SEC23IP	0.821563	-0.517205	-1.52191	0.615965	0.601589	1
ARAP1	0.665763	-1.74359	0.636495	0.304754	0.136578	1
BST1	0.823061	0.619868	0.741729	-1.06224	-1.12242	1
CTN0.000011	0.653988	0.241923	-1.76643	0.34977	0.520745	1
PPP1CB	0.820066	0.748132	0.613295	-1.16886	-1.01263	1
NSFL1C	1.16511	-1.18858	-0.313864	-0.56427	0.901602	1
ACP1	0.777418	0.707844	-0.859321	0.677041	-1.30298	1
DOCK8	0.597202	0.437754	0.352449	-1.78114	0.393737	1
CPQ	0.99424	0.417344	-1.09309	0.732871	-1.05136	1
MRPL49	1.27984	-1.16935	-0.38855	0.773462	-0.4954	1
EXOC5	1.75399	-0.492727	-0.586324	-0.103818	-0.571123	1
RBM8A	1.23645	-1.5139	-0.150683	0.394268	0.0338688	1
RAB7A	0.856967	-0.801939	-1.33997	0.615763	0.669183	1
USE1	0.713082	0.666207	0.351613	-1.70986	-0.0210445	1
HDGFL3	0.961016	0.239845	-1.69837	0.321971	0.175534	1
CASP14	0.944806	-1.70526	0.315362	0.243966	0.201127	1
MXRA5	0.871439	0.629495	-1.04864	0.680054	-1.13234	1
BSG	1.25392	0.181088	-1.26629	0.539004	-0.707718	1
PALM	0.652468	0.508363	-0.0509384	-1.71627	0.606373	1
CD74	1.12687	0.617874	-0.155565	-1.5231	-0.0660745	1
SMPDL3B	1.78885	-0.447214	-0.447214	-0.447214	-0.447214	1
CDCP1	1.66378	0.0712585	-0.584221	-0.241285	-0.909528	1
IDH3G	1.24308	0.0772346	-1.54377	0.254233	-0.0307806	1
ARCN1	1.11302	-1.60535	0.032932	0.426451	0.0329546	1
SQOR	0.850582	-1.70782	0.24611	0.542784	0.0683454	1
PARP14	0.82131	-0.777856	-1.36068	0.63208	0.685143	1
C2CD5	1.08508	-1.08188	-0.709359	1.02376	-0.317599	1
SORD	1.14607	-0.972429	-0.619982	-0.569583	1.01592	1
RAB1C	0.810392	0.814382	-1.26376	-0.893878	0.532863	1
PDS5A	0.657665	0.541436	0.141737	0.414779	-1.75562	1
GIPC1	0.904472	-1.46625	0.84174	-0.517027	0.237065	1
ROCK2	0.71275	0.393313	-1.75901	0.448961	0.203986	1
IGFBP2	1.26518	-0.631775	-0.0374424	-1.25223	0.656275	1
VIRMA	1.46963	-0.357308	0.315655	-0.169314	-1.25866	1
PTGES3	1.7615	-0.275326	-0.260003	-0.581684	-0.644486	1
CAPN2	1.14622	-1.57996	-0.142628	0.246575	0.329792	1
AGR2	1.18371	-0.402717	-1.48	0.31831	0.380696	1
SOD3	1.02011	0.674234	-1.56655	0.0819521	-0.209749	1
SACM1L	1.10269	-0.964451	-0.330145	-0.833159	1.02506	1
WBP11	1.32447	-0.598066	-1.30677	0.212624	0.367737	1
BHMT	0.948664	-0.912308	-1.2229	0.778053	0.408495	1
QDPR	1.11452	-1.15814	0.0844395	0.818816	-0.859639	1
GPC4	1.75378	-0.58594	-0.58594	-0.106134	-0.475763	1
AKR7A3	0.870233	-1.53895	-0.442203	0.731106	0.379816	1
FDX1	1.23977	-1.45901	-0.152056	0.533644	-0.162347	1
MRPS9	1.09963	-0.979056	-0.718643	1.05301	-0.454945	1
MPV17	1.60439	0.0727785	-0.411754	-0.158133	-1.10728	1
COPS6	0.974935	0.454129	-1.66167	0.282226	-0.0496169	1
AGPAT5	1.60823	-0.657506	-0.657506	-0.649583	0.356361	1
CDH13	1.16704	-0.321379	-0.987921	-0.808821	0.951078	1
ANXA13	1.03341	-1.47168	0.177458	0.722314	-0.461508	1
DDR1	1.13541	-1.27354	-0.750035	0.700975	0.18719	1
H3-4	0.994209	-1.38635	-0.67429	0.351164	0.715266	1
DERPC	1.76925	-0.587838	-0.197241	-0.469556	-0.514612	1
H3C1	0.998109	-1.38084	-0.683548	0.358004	0.708275	1
H3C15	0.998105	-1.38716	-0.671592	0.348593	0.712053	1
VPS36	0.710356	0.795951	-1.0551	-1.13303	0.681817	2
COL11A2	-0.43303	1.78461	-0.401235	-0.388358	-0.56199	2
TBC1D22A	-0.951315	1.61346	-0.648999	0.181138	-0.194282	2
CA12	-1.01034	1.13665	1.01528	-0.521565	-0.620024	2
DERA	-0.345538	1.78392	-0.530995	-0.405774	-0.501615	2
SAMD9L	-0.438017	1.78879	-0.447368	-0.461313	-0.442087	2
WASF3	-0.919733	1.70735	-0.408397	-0.176329	-0.202892	2
KRT31	-0.659767	1.13188	1.04912	-0.874268	-0.646963	2
CDC42EP1	-0.84259	1.1551	1.02762	-0.700344	-0.639779	2
H2BC1	-0.222927	1.77421	-0.52999	-0.505448	-0.515849	2
MAT1A	-0.455595	1.78844	-0.469687	-0.451541	-0.411616	2
ANP32B	-0.970605	1.67614	-0.131462	-0.469287	-0.104783	2
STBD1	0.138355	1.36492	0.292313	-1.35624	-0.439341	2
ADPRH	-0.558194	1.26983	-1.36221	0.391293	0.259278	2
SERPINI1	-1.18026	1.39556	0.577525	-0.32039	-0.472437	2
PDLIM7	-0.710894	1.06419	-0.211104	-1.14521	1.00302	2
CHMP4B	-0.489138	1.78638	-0.502527	-0.371962	-0.422749	2
ANKHD1	-0.456182	1.78875	-0.451334	-0.452577	-0.428657	2
COL18A1	-0.524603	1.78513	-0.348547	-0.436481	-0.4755	2
STX1B	-0.823078	1.70733	-0.0441772	-0.582468	-0.257602	2
PYCARD	-0.463508	1.7875	-0.495346	-0.388626	-0.440018	2
ATP6V1H	-0.566438	1.78437	-0.402702	-0.388854	-0.426376	2
ARHGEF10	-0.722998	1.19795	0.986186	-0.763567	-0.697568	2
PPP1CA	-0.411527	1.78808	-0.425332	-0.481979	-0.469246	2
TMED10	-0.445629	1.77341	-0.23069	-0.522091	-0.575002	2
UBFD1	-0.526569	1.78569	-0.480317	-0.394718	-0.384088	2
CPSF1	-0.769078	1.74541	-0.227796	-0.496769	-0.251768	2
SLC1A1	-0.447214	1.78885	-0.447214	-0.447214	-0.447214	2
CCDC134	-0.467693	1.64152	-0.714642	-0.714642	0.25546	2
FYTTD1	-0.642397	1.70648	-0.642397	0.0838421	-0.505526	2
ITPKB	-0.447214	1.78885	-0.447214	-0.447214	-0.447214	2
WDR44	-0.46441	1.78866	-0.458867	-0.43528	-0.430103	2
SEC61A2	-0.466535	1.78853	-0.463778	-0.42001	-0.438203	2
WDR47	-0.455732	1.7881	-0.48416	-0.403193	-0.445014	2
ITGA2B	-0.427261	1.78815	-0.485884	-0.46066	-0.414344	2
APOBEC3G	-0.760872	1.1527	1.03577	-0.729911	-0.697687	2
CLIC6	-0.417974	1.78689	-0.527718	-0.422413	-0.418791	2
PIKFYVE	-0.470412	1.7886	-0.438769	-0.454016	-0.425404	2
FUCA2	-0.53153	1.77379	-0.222392	-0.48127	-0.538594	2
ASPSCR1	-0.403415	1.78801	-0.490106	-0.445498	-0.448994	2
COL8A1	-0.478385	1.78852	-0.430914	-0.447619	-0.431605	2
PDXDC1	-0.437472	1.78882	-0.452685	-0.449906	-0.448762	2
CPOX	-0.749905	1.29399	0.872009	-0.699134	-0.716963	2
ITGA5	-0.430366	1.78867	-0.456108	-0.465679	-0.436519	2
EPN2	-0.503792	1.78125	-0.29534	-0.534952	-0.447162	2
SEC61A1	-0.469325	1.78831	-0.466508	-0.407839	-0.444642	2
NUP210	-0.508165	1.78738	-0.457787	-0.403226	-0.418199	2
OPLAH	-0.466309	1.78849	-0.459468	-0.449107	-0.413603	2
DFFA	-0.487027	1.77575	-0.236726	-0.51762	-0.534374	2
ENPP6	-0.441376	1.78881	-0.439846	-0.452887	-0.454706	2
HSP90AA4P	-0.506801	1.78454	-0.521972	-0.361452	-0.394311	2
ARPC3	-0.467833	1.7871	-0.375875	-0.447894	-0.495497	2
ZAP70	-0.459921	1.78876	-0.453118	-0.431891	-0.443826	2
ATP6V1E1	-0.42644	1.78814	-0.471312	-0.412312	-0.478078	2
RENBP	-0.891888	1.21447	0.61788	0.202671	-1.14313	2
P4HA1	-0.469376	1.78742	-0.500825	-0.403369	-0.413853	2
SUGT1	-0.362585	1.78658	-0.478678	-0.491861	-0.453451	2
FLG	-0.754393	1.2966	0.868562	-0.695928	-0.714843	2
MUC4	-0.447214	1.78885	-0.447214	-0.447214	-0.447214	2
DHX36	-0.580575	1.74802	-0.0719919	-0.51488	-0.580575	2
HMGB2	-0.607751	1.6839	-0.610992	0.163422	-0.628577	2
GAB2	-0.420169	1.78864	-0.456156	-0.456156	-0.456156	2
OPHN1	-0.702474	1.72114	-0.702474	-0.138538	-0.17765	2
MTFR1L	-0.436694	1.78873	-0.466638	-0.446948	-0.438448	2
NIPS0.00001P1	-1.24344	1.44799	0.189527	0.151965	-0.546041	2
TMEM126A	-0.905179	1.2212	-0.72818	-0.526771	0.938932	2
PTPA	-0.654143	1.72797	-0.422581	-0.638349	-0.0128933	2
RAPGEF2	-0.452685	1.78877	-0.452685	-0.452685	-0.430719	2
LRP2	-0.737431	1.06566	-1.03153	1.062	-0.3587	2
STK38L	-0.354003	1.7863	-0.477431	-0.477431	-0.477431	2
DUOX2	-0.738282	1.12623	-0.772791	-0.678006	1.06284	2
ARHGAP31	-0.539911	1.76216	-0.539911	-0.539911	-0.142425	2
HKDC1	-0.766648	1.07403	-0.724966	-0.698387	1.11598	2
GRIK3	-0.401284	1.78745	-0.4863	-0.413561	-0.4863	2
DOCK11	-0.652441	1.72129	-0.652441	-0.430817	0.0144115	2
NDUFB8	-0.151257	1.25804	-1.49078	-0.0296872	0.413684	2
HID1	-0.565302	1.77881	-0.526978	-0.381242	-0.305292	2
STK39	-0.772699	1.27559	0.894154	-0.683948	-0.713098	2
FAM135A	-0.328567	1.78467	-0.495432	-0.486804	-0.473871	2
DDX6	-0.461945	1.78529	-0.382794	-0.397789	-0.54276	2
GTF3C4	-0.570253	1.77448	-0.340476	-0.295736	-0.568017	2
DLG1	-0.513412	1.78552	-0.454124	-0.470418	-0.347566	2
ADI1	-0.759884	1.75623	-0.274992	-0.325755	-0.395598	2
ADH1C	-0.534874	1.52199	0.459347	-0.458336	-0.988124	2
LDLRAP1	-0.481231	1.78647	-0.512464	-0.402559	-0.390216	2
BZW2	-0.422201	1.78753	-0.506657	-0.452839	-0.405836	2
EPB41L1	-0.472788	1.78747	-0.487124	-0.384587	-0.442971	2
OGT	-0.459187	1.78835	-0.479642	-0.420057	-0.429465	2
HDAC6	-1.04688	1.24509	0.873896	-0.623747	-0.448366	2
SNX8	-0.128106	1.54383	-0.941131	-0.785852	0.311258	2
ITGB2	-0.515293	1.77287	-0.212285	-0.519436	-0.525856	2
VMA21	-0.428126	1.17137	0.910395	-0.474305	-1.17933	2
ABHD10	-0.508039	1.74918	-0.683863	-0.450883	-0.10639	2
ECPAS	-0.475677	1.77595	-0.32176	-0.626137	-0.352373	2
COPA	-0.531861	1.77021	-0.63219	-0.295594	-0.310563	2
ADGRL2	-0.438279	1.78859	-0.42337	-0.464873	-0.462069	2
SEMA7A	-0.317	1.78371	-0.474373	-0.480753	-0.511587	2
PPP2R5D	-0.997117	1.52881	0.439043	-0.43755	-0.533186	2
NDUFA5	-0.656015	1.73576	-0.137054	-0.254923	-0.687766	2
LSM3	-0.293129	1.78056	-0.555338	-0.445122	-0.486973	2
WIPI2	-0.525532	1.78359	-0.319661	-0.477927	-0.460468	2
THEM6	-0.447214	1.78885	-0.447214	-0.447214	-0.447214	2
TXNL4A	-0.872232	1.70619	-0.0927767	-0.520304	-0.220882	2
DOCK9	-0.647764	1.77438	-0.336534	-0.45251	-0.337573	2
HDHD5	-0.185025	1.76552	-0.630287	-0.473665	-0.476541	2
EEF1AKMT4-ECE2	-0.731935	1.69644	-0.750065	-0.127068	-0.0873676	2
SLC12A4	-0.899022	1.63674	-0.570736	-0.377725	0.210739	2
SETX	-0.972803	1.68851	-0.298424	-0.0935952	-0.323686	2
MPG	-0.746506	1.63493	-0.746506	0.247155	-0.389073	2
RABGGTB	0.0901448	0.879834	-1.70831	0.48505	0.253286	2
KRT33B	0.298246	0.644103	0.632102	-1.75086	0.176409	2
CRTAP	0.48299	0.500718	0.391593	-1.78695	0.411651	2
HNRNPH1	-1.27165	1.48107	0.111523	-0.410874	0.0899291	2
PDLIM1	0.630534	0.890305	-1.52956	0.489231	-0.480515	2
HLA-C	0.354727	0.58968	0.478431	-1.78037	0.357532	2
GBP5	-0.894542	1.2816	-0.793552	0.853232	-0.446735	2
SMARCC2	0.441159	0.697169	-1.7588	0.439559	0.180917	2
HSPB11	0.469196	0.812386	-0.123057	0.523836	-1.68236	2
TGM3	-0.696961	1.69327	-0.791202	-0.0976236	-0.107483	2
TOM1	0.34384	0.765226	-0.00737361	0.608741	-1.71043	2
TMED2	0.143978	0.969437	-1.69209	0.222796	0.35588	2
MRPL50	0.615872	0.869202	-0.371396	-1.58327	0.469591	2
ATG9A	0.618427	0.631824	0.0110446	-1.73128	0.469986	2
ACTN2	0.52893	0.888581	-1.11938	0.754595	-1.05272	2
COL3A1	-0.89244	1.59844	-0.801418	0.0768923	0.0185216	2
NIFK	-0.828192	1.6267	-0.814989	-0.034108	0.0505839	2
PGS1	0.441036	1.56832	-0.669787	-0.669787	-0.669787	2
TRADD	-0.185306	1.76576	-0.577031	-0.426394	-0.577031	2
HDGF	0.274167	1.42366	-1.03601	0.219404	-0.881225	2
CTSH	-0.702097	1.72259	-0.207276	-0.118398	-0.694816	2
PAK2	-0.401296	1.14771	-0.932405	0.997167	-0.811175	2
BORCS8	-1.24426	1.467	0.10589	0.178118	-0.506749	2
DENND3	-0.388751	1.60177	-0.946881	-0.552113	0.285972	2
SCG3	0.18058	0.765175	0.173027	0.608111	-1.72689	2
RNPS1	0.0351139	0.954587	-1.67873	0.21795	0.471075	2
GLS	0.370595	0.733971	-1.75398	0.460023	0.189393	2
NUP205	0.36233	0.726709	0.168543	-1.75161	0.494028	2
TOP2B	0.319754	0.636203	0.404312	0.416307	-1.77658	2
CHMP4A	0.940781	1.22688	-0.892649	-0.642406	-0.632606	2
FBP2	-0.483842	1.78809	-0.423888	-0.467043	-0.413315	2
ACTR1A	-0.560991	1.77976	-0.286011	-0.487838	-0.44492	2
0.00001GA	0.284785	1.03458	-1.63537	0.407194	-0.0911905	2
ARFGAP2	0.577732	0.97685	-0.84709	-1.2876	0.580105	2
NDUFB6	-0.612115	0.863981	-1.46399	0.62821	0.58391	2
NUB1	-0.447214	1.78885	-0.447214	-0.447214	-0.447214	2
EPHX2	0.00678504	0.80103	0.100718	0.75723	-1.66576	2
RPL21	-0.787669	1.51791	-0.927588	-0.214082	0.411428	2
CBL	-0.745219	1.21683	-1.06716	-0.271346	0.866894	2
CALU	0.183615	0.713623	0.295581	0.556467	-1.74929	2
HADH	-0.50815	1.75981	-0.500584	-0.138688	-0.612391	2
MAPK3	-0.806076	1.1008	-0.957252	1.03932	-0.376789	2
VCL	-1.32513	1.45324	0.243327	-0.141395	-0.230046	2
WASH2P	-1.0471	1.51207	-0.0644222	0.315896	-0.716439	2
HNRNPA3	0.35835	0.670322	0.507098	-1.76433	0.228562	2
PDE10A	-0.215041	1.77141	-0.556239	-0.443896	-0.556239	2
PUS1	-0.700617	1.38942	-0.727593	0.743443	-0.704656	2
TP53I3	0.176074	0.724278	-1.75072	0.330769	0.519601	2
AATF	-1.01494	1.17404	-1.08025	0.447739	0.473406	2
REG4	0.177912	1.24636	-1.32795	-0.616868	0.520549	2
RPS12	-0.405878	1.78786	-0.479859	-0.422261	-0.479859	2
ADD3	-0.580461	0.887986	-1.44444	0.834787	0.302125	2
MTM1	-0.713223	1.40426	-0.948106	0.67048	-0.413415	2
ANGPTL3	0.913071	1.23924	-0.675004	-0.943257	-0.534053	2
SUFU	-0.960812	1.46507	0.350115	-0.897745	0.0433713	2
RIF1	0.516953	0.734693	-1.63431	-0.282379	0.665042	2
DDAH2	-0.229975	0.753949	-1.6516	0.476871	0.650755	2
SESN2	-0.696096	1.63128	-0.696096	0.293526	-0.532613	2
PPIL4	-0.451723	1.70063	-0.728523	-0.604907	0.0845227	2
NUP37	-0.562394	1.62451	-0.895754	-0.421175	0.254816	2
EEF1AKMT4	-0.745421	1.69332	-0.745421	-0.122012	-0.0804673	2
PNPLA6	-0.668706	1.68165	0.167059	-0.609481	-0.570525	2
TAB1	-0.142973	1.63766	-0.653715	-0.928751	0.0877791	2
APP	0.528518	0.599854	0.330806	-1.77525	0.316071	2
NLGN3	-0.960435	1.65804	0.0845833	-0.303344	-0.478845	2
PAPSS2	0.282588	0.622641	0.310831	0.5531	-1.76916	2
D0.00001JC11	0.448966	0.650286	0.0468207	0.592429	-1.7385	2
KIT	0.482342	0.874404	-1.71255	0.12031	0.235495	2
CSNK2B	-0.965741	1.4016	0.438176	0.0772358	-0.951267	2
ALG5	-1.11203	1.51102	-0.423765	0.399897	-0.375115	2
OTUB1	-0.564304	1.7575	-0.545162	-0.117141	-0.53089	2
MEF2D	0.454607	0.936213	-0.457279	0.599059	-1.5326	2
WDR1	-0.736401	1.73489	-0.384748	-0.542976	-0.070767	2
CASP8	-1.35492	1.27673	-0.0583387	-0.442332	0.578859	2
CHGA	-0.5033	1.66963	-0.964292	-0.0349202	-0.167122	2
UBE2L5	-0.614804	1.72809	-0.0915811	-0.740422	-0.28128	2
INF2	0.732825	0.886061	-1.15409	-1.01914	0.554343	2
ZSWIM8	-0.905179	1.12146	-0.432757	1.03351	-0.817037	2
ICOSLG	0.267569	0.722651	-1.75395	0.520084	0.243644	2
MFAP4	-0.660594	0.819626	-1.43472	0.53852	0.737165	2
IFIT1	0.293726	0.567819	0.487593	0.430753	-1.77989	2
WASH3P	-1.0471	1.51207	-0.0644222	0.315896	-0.716439	2
DCTN5	-0.617504	1.71743	-0.617504	0.0515819	-0.534003	2
CYP2J2	-0.7797	1.73872	-0.449976	-0.118739	-0.390307	2
ARMCX2	-0.966789	1.62164	0.21771	-0.497553	-0.375012	2
CELA2B	-0.447214	1.78885	-0.447214	-0.447214	-0.447214	2
MICOS10	-0.67015	1.56725	0.443198	-0.67015	-0.67015	2
SULT1B1	-0.515355	1.7826	-0.533017	-0.327703	-0.406523	2
WASHC1	-1.0471	1.51207	-0.0644226	0.315897	-0.716438	2
LGALS9C	0.148092	-0.727246	1.6698	-0.3634	-0.727246	3
LGALS9B	0.148092	-0.727246	1.6698	-0.3634	-0.727246	3
TMEM106C	0.124878	-0.607161	1.69661	-0.607161	-0.607161	3
BID	0.587957	-1.08196	1.43019	-0.46593	-0.470251	3
ATP1A4	0.890462	-0.748105	1.27933	-0.718731	-0.702958	3
ACOT2	-0.2166	-0.535723	1.77326	-0.526082	-0.494852	3
ITSN1	-0.456155	-0.467445	1.7882	-0.400629	-0.463967	3
ITGAD	-0.447214	-0.447214	1.78885	-0.447214	-0.447214	3
MAP7D1	-0.46628	-0.466427	1.78852	-0.425007	-0.430805	3
HEPACAM	-0.348654	-0.545498	1.7843	-0.423331	-0.466821	3
SRP68	-0.821563	1.02463	1.15953	-0.7154	-0.647196	3
ARRB1	-0.437293	-0.492918	1.78815	-0.416818	-0.441122	3
PSMD1	-0.448772	-0.454819	1.78872	-0.458436	-0.426692	3
TFPI	-0.454697	-0.463413	1.78858	-0.452853	-0.417617	3
NIBAN1	-0.530593	-0.398712	1.78473	-0.362994	-0.492429	3
SRSF2	-0.449517	-0.487125	1.78774	-0.460385	-0.390716	3
MLPH	-0.532547	-0.402144	1.78642	-0.407453	-0.44427	3
MPST	-0.592725	-0.215631	1.76416	-0.606649	-0.349152	3
XRN2	-0.454959	-0.450226	1.78873	-0.427458	-0.456091	3
ATP6V1C1	-0.716952	-0.464798	1.74501	-0.0996206	-0.463639	3
ATAD3A	-0.453905	-0.447904	1.78884	-0.442381	-0.444648	3
PKN2	-0.443798	-0.459535	1.78878	-0.435006	-0.450443	3
GADD45GIP1	-0.519242	-0.386921	1.78245	-0.339116	-0.53717	3
HLA-B	-0.486104	-0.551006	1.78138	-0.442187	-0.302082	3
HMOX1	-0.646596	-0.367469	1.77655	-0.385734	-0.376756	3
FHL3	-0.447214	-0.447214	1.78885	-0.447214	-0.447214	3
PRKAR1A	-0.501419	-0.446872	1.78779	-0.432283	-0.407215	3
LRRC8D	-0.523123	-0.523123	1.77149	-0.523123	-0.202119	3
STARD13	-0.447214	-0.447214	1.78885	-0.447214	-0.447214	3
CTPS2	-0.75287	-0.721833	1.11363	-0.715785	1.07686	3
CLCA2	-0.278468	-0.508554	1.78047	-0.508554	-0.484896	3
SLC11A2	-0.447214	-0.447214	1.78885	-0.447214	-0.447214	3
CDH16	0.0877687	-0.655785	1.70354	-0.479736	-0.655785	3
TRAF1	-0.447214	-0.447214	1.78885	-0.447214	-0.447214	3
POLR1A	-0.153176	-0.984654	1.65237	0.0113097	-0.525854	3
RFC5	-0.64018	-0.474705	1.75332	-0.527666	-0.110768	3
PSMA2	-0.630729	-0.638265	1.67694	-0.590921	0.182973	3
BLOC1S2	-0.531839	-0.531839	1.76693	-0.531839	-0.171418	3
DCTN3	-0.974973	0.700141	1.38681	-0.650157	-0.461823	3
FBXO7	-0.560804	-0.113452	1.75671	-0.521645	-0.560804	3
SARNP	-0.538388	-0.49022	1.78438	-0.367543	-0.388229	3
MXRA7	-0.447214	-0.447214	1.78885	-0.447214	-0.447214	3
TRA2B	-0.405061	-0.493471	1.78683	-0.494638	-0.393663	3
STK4	-0.229299	-0.59284	1.7711	-0.407674	-0.541283	3
FDXR	-0.485525	-0.45881	1.78802	-0.442222	-0.401465	3
ARHGEF10L	-0.429865	-0.459278	1.78866	-0.463984	-0.435535	3
GBF1	-0.621742	-0.412184	1.77854	-0.411647	-0.332971	3
EHMT2	-0.447214	-0.447214	1.78885	-0.447214	-0.447214	3
TOR1B	-0.447214	-0.447214	1.78885	-0.447214	-0.447214	3
GFM2	-0.144548	-1.00016	1.40296	-0.828106	0.569851	3
CD2BP2	-0.447214	-0.447214	1.78885	-0.447214	-0.447214	3
EXOC4	-0.822341	-0.676737	1.14565	-0.686656	1.04009	3
TEX10	-0.603001	-0.235481	1.76439	-0.322903	-0.603001	3
TTC27	-0.447214	-0.447214	1.78885	-0.447214	-0.447214	3
C11orf96	-0.447214	-0.447214	1.78885	-0.447214	-0.447214	3
FMN2	-0.447214	-0.447214	1.78885	-0.447214	-0.447214	3
MRPL41	-0.447214	-0.447214	1.78885	-0.447214	-0.447214	3
SBSPON	-0.447214	-0.447214	1.78885	-0.447214	-0.447214	3
BPIFA1	-0.447214	-0.447214	1.78885	-0.447214	-0.447214	3
DUSP14	-0.447214	-0.447214	1.78885	-0.447214	-0.447214	3
BRMS1	-0.447214	-0.447214	1.78885	-0.447214	-0.447214	3
SLC27A1	-0.377135	-0.687363	1.7259	-0.0242438	-0.637161	3
POLR2H	-0.447214	-0.447214	1.78885	-0.447214	-0.447214	3
PXYLP1	-0.447214	-0.447214	1.78885	-0.447214	-0.447214	3
MIER1	-0.551783	-0.551783	1.7541	-0.098746	-0.551783	3
STK25	-0.510538	-0.719737	1.60827	-0.719737	0.341747	3
CPEB3	-0.447214	-0.447214	1.78885	-0.447214	-0.447214	3
SLC9A3	-0.447214	-0.447214	1.78885	-0.447214	-0.447214	3
CAMK2B	-0.447401	-0.448081	1.78885	-0.446862	-0.44651	3
NDE1	-0.755635	-0.47857	1.64778	-0.653599	0.240023	3
PIK3CB	-0.471197	-0.423459	1.7886	-0.448171	-0.445771	3
MBD2	-0.457484	-0.443946	1.78867	-0.462237	-0.425001	3
RPS6KA2	-0.48534	-0.397116	1.78786	-0.467043	-0.438363	3
RNF126	-0.447214	-0.447214	1.78885	-0.447214	-0.447214	3
CASP4	-0.445603	-0.452253	1.78882	-0.437149	-0.453811	3
ABCB1	-0.460823	-0.435221	1.78872	-0.434808	-0.457869	3
CAMK2G	-0.457301	-0.466716	1.78865	-0.433711	-0.430919	3
CNOT9	-0.465296	-0.456017	1.78868	-0.436513	-0.430852	3
ATAD3C	-0.455062	-0.440601	1.78883	-0.449129	-0.444036	3
THNSL1	-0.415548	-0.503378	1.78609	-0.371008	-0.496155	3
NOMO2	-0.423402	-0.46187	1.78867	-0.451322	-0.452077	3
EIF2S2	-0.476312	-0.46069	1.78798	-0.456618	-0.39436	3
ANK3	-0.457166	-0.450236	1.7888	-0.436113	-0.445287	3
IDH3B	-0.474295	-0.435585	1.78854	-0.453822	-0.424836	3
CUBN	-0.451229	-0.423648	1.78863	-0.446237	-0.46752	3
OSBPL3	-0.468864	-0.44325	1.78866	-0.449142	-0.427401	3
RAB18	-0.404833	-0.445153	1.78815	-0.482805	-0.455363	3
SEC24A	-0.445746	-0.469638	1.78855	-0.454617	-0.418544	3
RBMXL3	-0.43376	-0.452465	1.78873	-0.438893	-0.463615	3
GMIP	-0.441508	-0.434199	1.78825	-0.421975	-0.490565	3
LRP6	-0.449849	-0.452567	1.78879	-0.432798	-0.453577	3
TCIRG1	-0.443455	-0.495378	1.78804	-0.436749	-0.412456	3
CDCA2	-0.447214	-0.447214	1.78885	-0.447214	-0.447214	3
LSM4	-0.417776	-0.496161	1.7879	-0.456686	-0.41728	3
DPYD	-0.480044	-0.460438	1.78833	-0.421975	-0.425873	3
PARP4	-0.480689	-0.313611	1.78359	-0.489297	-0.499991	3
STAM2	-0.448932	-0.449947	1.7888	-0.43409	-0.455827	3
SNIP1	-0.444182	-0.550884	1.78314	-0.326624	-0.461454	3
MXRA8	-0.449638	-0.481201	1.78834	-0.444067	-0.413431	3
SEPTIN6	-0.468096	-0.396913	1.78803	-0.449136	-0.473886	3
FKBP10	-0.785179	-0.231685	1.74267	-0.4844	-0.241405	3
NDUFAF7	-0.467451	-0.478117	1.78818	-0.409059	-0.433556	3
SCARB1	-0.430456	-0.434198	1.78858	-0.47477	-0.449158	3
MYO7B	-0.436357	-0.483804	1.78832	-0.451037	-0.417125	3
BRD3	-0.447214	-0.447214	1.78885	-0.447214	-0.447214	3
HEATR1	-0.751205	0.950571	1.22928	-0.729765	-0.698876	3
STXBP2	-0.82993	1.02323	1.15728	-0.755611	-0.594964	3
VTI1B	-0.522008	-0.500971	1.78394	-0.428219	-0.332744	3
GINS1	-0.444229	-0.46234	1.78781	-0.394108	-0.487136	3
ECE1	-0.481072	-0.432977	1.78841	-0.422173	-0.452185	3
FYN	-0.428814	-0.475124	1.78851	-0.428295	-0.456273	3
NLRX1	-0.463124	-0.448728	1.7887	-0.426555	-0.450293	3
ARFIP1	-0.498451	-0.396187	1.78347	-0.347403	-0.541426	3
GOLGA2	-0.508723	-0.264241	1.77883	-0.477981	-0.527887	3
MB21D2	-0.479819	-0.459773	1.78811	-0.401316	-0.447202	3
RPS6KA1	-0.489439	-0.39551	1.78768	-0.470981	-0.431748	3
PTPRM	-0.448076	-0.434819	1.78877	-0.444128	-0.461748	3
EIF4H	-0.431523	-0.382039	1.78692	-0.509328	-0.464032	3
PFDN4	-0.432813	-0.461903	1.78854	-0.469291	-0.424529	3
PKP1	-0.496969	-0.465155	1.78491	-0.333076	-0.489708	3
TRIM3	-0.454017	-0.44829	1.78878	-0.454475	-0.431998	3
NELFB	-0.493549	-0.349587	1.78431	-0.409247	-0.531929	3
NOMO3	-0.422743	-0.462273	1.78866	-0.451434	-0.45221	3
RRP8	-0.472033	-0.463251	1.78842	-0.436595	-0.416545	3
ACAD9	-0.439171	-0.431978	1.78872	-0.453763	-0.463804	3
CDK5	-0.486273	-0.389833	1.78771	-0.465022	-0.446578	3
SPRN	-0.447214	-0.447214	1.78885	-0.447214	-0.447214	3
RPS6KA3	-0.830607	0.304657	1.61139	-0.41702	-0.668422	3
RASAL1	-0.534383	-0.612694	1.76459	-0.1772	-0.44031	3
WDR17	-0.447214	-0.447214	1.78885	-0.447214	-0.447214	3
RNF113A	-0.447214	-0.447214	1.78885	-0.447214	-0.447214	3
MADD	-0.447971	-0.444796	1.78885	-0.4477	-0.448386	3
HNF1A	-0.447214	-0.447214	1.78885	-0.447214	-0.447214	3
DDR2	-0.447214	-0.447214	1.78885	-0.447214	-0.447214	3
PHYHD1	-0.447214	-0.447214	1.78885	-0.447214	-0.447214	3
ITPRIP	-0.447214	-0.447214	1.78885	-0.447214	-0.447214	3
SFRP1	-0.667506	-0.667506	1.57496	0.427555	-0.667506	3
ICAM5	-0.447214	-0.447214	1.78885	-0.447214	-0.447214	3
KL	-0.447214	-0.447214	1.78885	-0.447214	-0.447214	3
PLA2R1	-0.447214	-0.447214	1.78885	-0.447214	-0.447214	3
LRP5	-0.447214	-0.447214	1.78885	-0.447214	-0.447214	3
UTP25	-0.568929	-0.568929	1.74007	-0.0332837	-0.568929	3
BTN2A2	-0.447214	-0.447214	1.78885	-0.447214	-0.447214	3
SERPINB2	-0.763745	-0.260815	1.68739	0.0438846	-0.706717	3
PDE4B	-0.447214	-0.447214	1.78885	-0.447214	-0.447214	3
RPL10L	-0.597699	0.703985	1.41178	-0.729209	-0.788857	3
LRRC40	-0.885227	-0.254257	1.55971	0.351457	-0.771686	3
ZSCAN18	-0.447214	-0.447214	1.78885	-0.447214	-0.447214	3
RPS8	-0.673509	-0.44656	1.71496	-0.635765	0.0408704	3
ZC3HAV1L	-0.447214	-0.447214	1.78885	-0.447214	-0.447214	3
MTIF3	-0.447214	-0.447214	1.78885	-0.447214	-0.447214	3
TBP	-0.447214	-0.447214	1.78885	-0.447214	-0.447214	3
NBEAL2	-0.949513	0.708133	1.33381	-0.213632	-0.878798	3
CBFB	-0.78055	-0.427262	1.73378	-0.0842452	-0.441719	3
CPEB2	-0.447214	-0.447214	1.78885	-0.447214	-0.447214	3
REEP5	-0.447214	-0.447214	1.78885	-0.447214	-0.447214	3
NPTN	-0.447214	-0.447214	1.78885	-0.447214	-0.447214	3
TEAD1	-0.447214	-0.447214	1.78885	-0.447214	-0.447214	3
CDC42EP3	-0.447214	-0.447214	1.78885	-0.447214	-0.447214	3
RBBP6	-0.476037	-0.528944	1.77626	-0.242336	-0.528944	3
OCLN	-0.424082	-0.464258	1.78861	-0.460981	-0.439292	3
CPEB4	-0.447214	-0.447214	1.78885	-0.447214	-0.447214	3
NCOA1	-0.447214	-0.447214	1.78885	-0.447214	-0.447214	3
ALKBH5	-0.447214	-0.447214	1.78885	-0.447214	-0.447214	3
LSR	-0.45183	-0.45905	1.78877	-0.432231	-0.445656	3
SFT2D2	-0.447214	-0.447214	1.78885	-0.447214	-0.447214	3
SLC35F6	-0.447214	-0.447214	1.78885	-0.447214	-0.447214	3
THYN1	-0.837807	0.184684	1.60855	-0.14595	-0.809474	3
KAT0.00001L1	-0.447214	-0.447214	1.78885	-0.447214	-0.447214	3
CDK9	-0.404839	-0.461161	1.78832	-0.461161	-0.461161	3
SUMO2	-0.447214	-0.447214	1.78885	-0.447214	-0.447214	3
AGPAT2	-0.447214	-0.447214	1.78885	-0.447214	-0.447214	3
CAMK2A	-0.484547	-0.485436	1.78748	-0.42118	-0.396321	3
ARRDC1	-0.447214	-0.447214	1.78885	-0.447214	-0.447214	3
DENND1A	-0.447214	-0.447214	1.78885	-0.447214	-0.447214	3
GMDS	-0.605392	-0.535972	1.73115	0.00125563	-0.591046	3
EEPD1	-0.447214	-0.447214	1.78885	-0.447214	-0.447214	3
TMEM53	-0.447214	-0.447214	1.78885	-0.447214	-0.447214	3
CNTROB	-0.447214	-0.447214	1.78885	-0.447214	-0.447214	3
RIOK2	-0.447214	-0.447214	1.78885	-0.447214	-0.447214	3
CBX7	-0.569905	-0.569905	1.73918	-0.0294692	-0.569905	3
FER	-0.447214	-0.447214	1.78885	-0.447214	-0.447214	3
AADAC	-0.447214	-0.447214	1.78885	-0.447214	-0.447214	3
EVI5L	-0.447214	-0.447214	1.78885	-0.447214	-0.447214	3
SLC25A32	-0.447214	-0.447214	1.78885	-0.447214	-0.447214	3
IDH2	-0.770924	-0.700507	1.69555	-0.198551	-0.0255678	3
SMYD4	-0.447214	-0.447214	1.78885	-0.447214	-0.447214	3
CELSR1	-0.447214	-0.447214	1.78885	-0.447214	-0.447214	3
MAOA	-0.662431	-0.797561	1.68624	-0.28056	0.0543081	3
HSD17B13	-0.601066	-0.174607	1.76579	-0.490889	-0.499232	3
RPL4	-0.313166	-0.36231	1.77616	-0.621574	-0.479113	3
D0.00001JB4	-0.464159	-0.467637	1.78846	-0.441207	-0.415459	3
CYRIA	-0.438302	-0.634375	1.77262	-0.445702	-0.254238	3
PPP2R2A	-0.423789	-0.499559	1.78794	-0.445432	-0.419163	3
PSMD10	-0.583379	-0.443074	1.77566	-0.496541	-0.252664	3
HIP1R	-0.590978	-0.484593	1.77974	-0.368382	-0.335783	3
SH3BP1	-0.960355	0.657555	1.40612	-0.724136	-0.379188	3
RARS1	-0.943615	0.241032	1.62073	-0.499298	-0.418848	3
RNF2	-0.543417	-0.326061	1.77871	-0.557639	-0.351592	3
RBM12	-0.536444	-0.259522	1.7783	-0.487435	-0.494901	3
PCDH1	-0.614855	-0.322425	1.77598	-0.497455	-0.34124	3
AP3M1	-0.513432	0.0101043	1.72808	-0.608678	-0.616072	3
GSTM3	-0.402339	-0.460028	1.7882	-0.474259	-0.451573	3
HERC4	-0.927659	0.206936	1.6341	-0.524559	-0.388818	3
CLTCL1	-0.625211	-0.157164	1.75757	-0.387988	-0.58721	3
CBX1	-0.546326	-0.609832	1.76651	-0.19843	-0.411927	3
INPPL1	-0.264478	-0.55478	1.76913	-0.61869	-0.33118	3
SF3A1	-0.522998	-0.445017	1.78597	-0.455005	-0.362945	3
NIPS0.00001P2	-0.640821	-0.052142	1.7423	-0.539598	-0.509743	3
CDK5RAP3	-0.472295	-0.422986	1.78857	-0.440798	-0.452488	3
AOC2	-0.472088	-0.435614	1.78867	-0.440771	-0.440192	3
MYD88	-0.553143	-0.571987	1.77367	-0.251321	-0.397221	3
MAG	-0.702476	-0.225592	1.7563	-0.295632	-0.532597	3
SPG21	-0.674536	-0.639595	1.73857	-0.104491	-0.31995	3
MICALL2	-0.203193	-0.607362	1.76564	-0.387355	-0.567725	3
GDA	-0.572597	0.304364	1.6286	-0.649867	-0.710504	3
D0.00001JA3	-0.494268	-0.428704	1.78684	-0.377171	-0.486692	3
MRPL15	-0.566751	-0.355754	1.76819	-0.607424	-0.238261	3
NQO2	-0.635953	-0.302368	1.77578	-0.424088	-0.413374	3
SVIL	-0.446197	-0.449577	1.78885	-0.448319	-0.444758	3
GIPC2	-0.425638	-0.438374	1.78863	-0.459944	-0.464672	3
FUT3	-0.797632	0.0658224	1.69838	-0.420642	-0.545924	3
FGB	-1.03021	1.01525	1.13138	-0.509642	-0.606781	3
GRK2	-0.489795	-0.216484	1.77227	-0.578444	-0.487545	3
PLOD3	-0.420291	-0.494517	1.78428	-0.34215	-0.527326	3
MAOB	-0.431702	-0.581319	1.78304	-0.387041	-0.382977	3
BRAT1	-0.47404	-0.364486	1.78598	-0.517834	-0.429617	3
MRPS5	-0.35885	-0.504128	1.78246	-0.366977	-0.552502	3
PAK1	-0.409306	-0.456816	1.78629	-0.390753	-0.529413	3
CLUH	-0.882228	0.803958	1.33262	-0.547385	-0.706969	3
GGT5	-0.477147	-0.591369	1.77849	-0.416404	-0.293573	3
PCYT2	-0.503005	-0.39024	1.78281	-0.546337	-0.343227	3
HCK	-0.429857	-0.460102	1.78874	-0.445218	-0.453562	3
BAG3	-0.495289	-0.47518	1.78524	-0.47765	-0.337122	3
TPPP3	-0.400925	-0.597697	1.77107	-0.539525	-0.232921	3
ISOC1	-0.671277	-0.0494161	1.73492	-0.400615	-0.613608	3
XPNPEP2	-0.515714	-0.195204	1.77043	-0.540265	-0.519249	3
EXOC6B	-0.520584	-0.419354	1.78713	-0.408875	-0.438317	3
ATP1B1	-0.435231	-0.448414	1.78798	-0.408993	-0.49534	3
C1orf56	-0.427214	-0.444433	1.78857	-0.476155	-0.440765	3
SNRPE	-0.387063	-0.462515	1.78776	-0.463485	-0.474702	3
PRKAB2	-0.501885	-0.446608	1.78418	-0.327959	-0.50773	3
NXF1	-0.851607	0.954962	1.21781	-0.601445	-0.719725	3
PSMA4	-0.365611	-0.152602	1.75039	-0.515993	-0.716185	3
HPCAL1	-0.538011	-0.550375	1.7718	-0.209708	-0.473703	3
ERP44	-0.449763	-0.162715	1.74874	-0.384257	-0.752001	3
ATAT1	-0.385638	-0.42493	1.78706	-0.501438	-0.475059	3
UGT2B15	-0.705368	-0.814447	1.36379	0.773372	-0.617343	3
POLB	-0.530563	-0.175951	1.76764	-0.530563	-0.530563	3
GDAP2	-0.447214	-0.447214	1.78885	-0.447214	-0.447214	3
EPB42	-1.31856	0.094305	1.27225	-0.586463	0.538471	3
TRBC1	-0.447214	-0.447214	1.78885	-0.447214	-0.447214	3
TPSD1	0.619386	-0.062641	1.31903	-1.17592	-0.699859	3
PPIAL4G	-0.756356	0.191563	1.44358	0.239273	-1.11806	3
SLC5A3	-0.447214	-0.447214	1.78885	-0.447214	-0.447214	3
MAP4	-0.987237	-0.482304	1.15907	0.992225	-0.681755	3
OSTF1	-0.310517	-0.759872	1.7578	-0.339481	-0.347932	3
CSE1L	-0.111435	-0.606007	1.75317	-0.445888	-0.589842	3
NRIP2	-1.00471	-0.94464	1.38384	0.174828	0.390686	3
NSDHL	0.352753	0.201861	0.833734	-1.73723	0.348887	3
FXR1	-0.155507	-1.56847	1.14607	0.156207	0.421701	3
PGRMC1	-0.408538	-0.421125	1.7879	-0.485127	-0.473107	3
ADH1A	0.192701	0.669516	1.17546	-0.850255	-1.18742	3
ILVBL	-0.960083	-0.724466	1.13197	1.0244	-0.471828	3
PTBP2	-0.682791	-0.530994	1.75468	-0.154971	-0.385921	3
SEPTIN8	-0.702028	-0.232445	1.48135	0.471267	-1.01815	3
LCK	-0.791801	-0.112961	1.66508	-0.766658	0.00634117	3
CNRIP1	-0.652475	-0.605322	1.71802	-0.504293	0.044065	3
KP0.000012	-0.0608945	-0.561259	1.74121	-0.667498	-0.451561	3
KRT37	0.610923	-1.06622	0.854502	-1.11615	0.716938	3
PFKL	-0.170975	-0.479644	1.67206	-0.0506938	-0.970748	3
PPIAL4D	-0.756356	0.191563	1.44358	0.239273	-1.11806	3
GTPBP10	-0.447214	-0.447214	1.78885	-0.447214	-0.447214	3
WDR77	-1.05393	0.16029	1.60291	-0.208522	-0.500741	3
ARL6IP5	-0.758376	0.170084	1.21632	0.61316	-1.24119	3
AKR1B1	-0.157233	-0.620158	1.76024	-0.55936	-0.423492	3
NFS1	-0.706586	-0.692492	1.67232	-0.442556	0.16931	3
PRKACA	0.347017	0.481849	0.61394	0.334446	-1.77725	3
SLC6A11	-0.447214	-0.447214	1.78885	-0.447214	-0.447214	3
MARK1	-0.114409	-0.407944	1.74433	-0.735843	-0.486137	3
USP32	-0.227175	-0.515882	1.77482	-0.515882	-0.515882	3
PSMC1	0.472554	0.101743	0.806316	0.349682	-1.73029	3
FERMT2	0.265456	0.282443	0.746062	0.461167	-1.75513	3
ARPC2	-0.147516	-0.691247	1.70293	-0.76901	-0.0951611	3
GP1BB	-0.630761	-0.0401471	1.73823	-0.602612	-0.464706	3
SH3YL1	-0.894465	0.15481	1.47511	0.236245	-0.971701	3
MTMR2	-0.268372	-0.671145	1.7591	-0.563482	-0.256103	3
CDC42EP5	-0.119849	-1.13615	1.51359	0.301712	-0.559296	3
KRT32	0.630095	-1.07173	0.878057	-1.10932	0.672901	3
RAB1B	0.453527	0.445443	0.665603	-1.76436	0.199783	3
HEPH	0.728695	-1.14933	0.783017	0.675916	-1.0383	3
SH3GL1	-1.17701	-0.291822	1.18965	-0.593636	0.872817	3
GOLGB1	1.07726	-0.753857	1.11321	-0.714495	-0.722123	3
PPIAL4H	-0.756356	0.191563	1.44358	0.239273	-1.11806	3
ZBTB7A	-0.447214	-0.447214	1.78885	-0.447214	-0.447214	3
TRBC2	-0.447214	-0.447214	1.78885	-0.447214	-0.447214	3
HEXA	-1.17897	-0.199874	1.59567	-0.0942241	-0.12261	3
AP5B1	-0.753761	-0.134158	1.73677	-0.288058	-0.560794	3
LAMP1	-0.433588	-0.737982	1.6417	0.245389	-0.715524	3
GALNT11	-0.564956	-0.564956	1.74359	-0.0487196	-0.564956	3
ATP6AP1	-0.492136	-0.885621	1.23819	-0.775977	0.915544	3
0.00001DK2	0.107747	-0.619818	1.70161	-0.569717	-0.619818	3
RING1	0.542778	-0.726851	1.46361	-0.310898	-0.96864	3
ABRAXAS2	-0.447214	-0.447214	1.78885	-0.447214	-0.447214	3
WASHC2A	0.12839	0.427609	0.647618	-1.75439	0.550778	3
SLC50A1	-0.447214	-0.447214	1.78885	-0.447214	-0.447214	3
S0.00001P29	-0.475377	-0.673299	1.76873	-0.305631	-0.314424	3
MAPRE1	-1.33267	0.0632171	1.47641	-0.00659864	-0.200358	3
WASHC2C	0.0620121	0.486479	0.723114	-1.73764	0.466039	3
CD14	0.191092	-0.694605	1.6658	-0.457332	-0.704955	3
GGA3	-0.447214	-0.447214	1.78885	-0.447214	-0.447214	3
CROCC	-0.0129629	-0.562399	1.73503	-0.560158	-0.599515	3
TXNL1	0.239358	-1.47118	1.28655	0.219253	-0.273979	3
VDAC1	-0.34812	-1.15263	1.56617	0.185503	-0.250925	3
LAMC1	-0.601494	-0.361095	1.74651	-0.66604	-0.117885	3
EPB41	0.592589	0.797714	0.792278	-1.05284	-1.12974	3
TXNDC11	-0.447214	-0.447214	1.78885	-0.447214	-0.447214	3
ITLN2	-0.634909	-0.140412	1.75526	-0.57965	-0.400292	3
OLIG2	-0.447214	-0.447214	1.78885	-0.447214	-0.447214	3
RCAN2	-0.447214	-0.447214	1.78885	-0.447214	-0.447214	3
CASC4	-1.24772	-0.0442014	1.55006	-0.077907	-0.180225	3
CDCA7	-0.333802	-0.75112	1.65106	0.184985	-0.75112	3
PPIAL4A	-0.756356	0.191563	1.44358	0.239273	-1.11806	3
PPIAL4C	-0.756356	0.191563	1.44358	0.239273	-1.11806	3
PPIAL4E	-0.756356	0.191563	1.44358	0.239273	-1.11806	3
PPIAL4F	-0.756356	0.191563	1.44358	0.239273	-1.11806	3
UGT2B17	-0.705368	-0.814447	1.36379	0.773372	-0.617343	3
MED8	-1.16874	-0.446225	0.0711812	1.55873	-0.0149494	4
R0.00001SE2	-0.53628	-0.456325	-0.443498	1.78489	-0.348785	4
AGO1	-0.50955	-0.371514	-0.46723	1.7866	-0.438302	4
SIAE	-0.253497	-0.525836	-0.522108	1.77761	-0.476171	4
GIMAP5	0.183896	-0.620266	-0.620266	1.6769	-0.620266	4
0.00001PRT	-0.477329	-0.341832	-0.48279	1.78559	-0.483635	4
STAT5B	-0.804838	-0.22797	-0.351744	1.74538	-0.360827	4
PKP3	-0.528255	-0.347051	-0.491151	1.78452	-0.418059	4
LPP	-0.490605	-0.377857	-0.471709	1.78722	-0.447051	4
YBX2	-0.445042	-0.446106	-0.450836	1.78885	-0.446866	4
KIF13B	-0.450756	-0.442428	-0.429941	1.7887	-0.465579	4
ADAMTSL4	-0.449639	-0.439718	-0.448408	1.78884	-0.451072	4
DSG2	-0.585846	-0.558276	-0.132248	1.75914	-0.482765	4
UGDH	-0.70486	1.04794	-0.945433	1.11658	-0.514218	4
CD93	-0.35193	-0.450767	-0.504125	1.78587	-0.479048	4
MYBBP1A	-0.455811	-0.470814	-0.470482	1.78788	-0.390773	4
NDUFB4	-0.375565	-0.402854	-0.666555	1.77329	-0.328319	4
PIPSL	-0.506611	-0.360032	-0.465286	1.78628	-0.454352	4
CHD5	-0.448451	-0.449854	-0.450291	1.78884	-0.440244	4
AOC1	-0.340943	-0.618625	-0.519925	1.77326	-0.293764	4
ALG11	-0.435246	-0.373525	-0.590794	1.78205	-0.382486	4
ATP2A3	-0.440369	-0.443121	-0.462675	1.78878	-0.442617	4
SEC24B	-0.41316	-0.368727	-0.505098	1.78587	-0.498885	4
TRNT1	-0.505988	-0.406359	-0.388951	1.78662	-0.485327	4
NOP14	-0.464342	-0.45082	-0.440651	1.78873	-0.432918	4
ARSH	-0.847212	-0.622823	1.00076	1.17875	-0.709474	4
GMPR2	-1.05264	-0.599719	0.767459	1.32329	-0.438386	4
MTCH2	-0.759221	-0.383976	-0.783137	1.59857	0.327768	4
CCDC90B	-0.724098	-0.70786	-0.748139	1.22878	0.951313	4
CSDE1	-0.72257	-0.725599	-0.74024	1.16083	1.02758	4
LSM1	-0.661439	-0.582617	-0.928264	1.11694	1.05538	4
PARG	-0.74902	-0.71647	-0.720762	1.18338	1.00287	4
POLR2A	-1.07431	-0.494059	-0.564785	1.1283	1.00485	4
ARSL	-0.843474	-0.623318	1.05187	1.13145	-0.71653	4
DPYSL3	-0.635416	0.659468	-1.45972	0.715581	0.720084	4
CTR9	-0.724204	-0.691807	-0.772595	1.14445	1.04416	4
TIMM50	0.870975	-0.26212	-0.880869	1.22223	-0.950217	4
PTP4A2	-0.711015	-0.416796	-0.27725	1.76479	-0.359724	4
UBE2N	-0.534245	-0.413896	-0.513731	1.78232	-0.320449	4
TBC1D24	-0.42549	-0.461597	-0.474162	1.78845	-0.427202	4
NEO1	-0.509268	-0.421796	-0.400421	1.78734	-0.455856	4
RASA1	-0.660238	-0.503048	0.00193274	1.72886	-0.567508	4
AIFM1	-0.450736	-0.525574	-0.618777	1.76335	-0.168265	4
CDH17	-0.468533	-0.400552	-0.482213	1.78797	-0.436669	4
MRPS26	0.183461	-0.962422	-0.906816	1.4741	0.211681	4
CCDC22	-0.734175	-0.392405	-0.262268	1.76067	-0.371825	4
APPL1	-0.419478	-0.523741	0.337294	1.57819	-0.972262	4
PTPN13	0.363521	-0.648617	-0.654423	1.605	-0.665479	4
ANKRD17	-0.450392	-0.432934	-0.476231	1.78854	-0.428986	4
ARL8A	-0.256435	-0.670569	-0.716669	1.72187	-0.0781995	4
PFAS	-0.37788	-0.48993	-0.470815	1.78725	-0.448621	4
FAM102A	-0.435971	-0.53764	-0.448788	1.78541	-0.36301	4
AGO3	-0.579613	-0.702344	-0.120422	1.74353	-0.341145	4
STRAP	-0.26315	-0.343581	-0.69959	1.76448	-0.458154	4
XPNPEP1	-0.639092	-0.535927	0.0980882	1.70355	-0.626616	4
SERPINB4	-0.724307	0.0988633	-0.00351445	1.59272	-0.963762	4
DNPH1	-0.154291	-0.537963	-0.521478	1.76408	-0.550346	4
CCT4	-0.500609	0.633966	-1.09744	1.39811	-0.434035	4
OMD	-0.508757	0.126007	-0.671849	1.69302	-0.638424	4
SERPINB3	-0.56107	-0.2052	0.0250653	1.66825	-0.927045	4
CCDC126	-0.299019	-0.476576	-0.543017	1.78163	-0.46302	4
RPL10A	-0.213429	-1.03065	-0.408239	1.65092	0.00139767	4
CDC42	-0.614505	-0.328623	-0.43824	1.77886	-0.397491	4
KHSRP	-0.499365	-0.328264	-0.317949	1.77396	-0.62838	4
MUC5AC	-0.430373	-0.468438	-0.476006	1.78825	-0.413433	4
SLC33A1	-0.650378	-0.155709	-0.172354	1.72299	-0.744551	4
CNN1	-0.575055	-0.324461	-0.661658	1.75722	-0.196044	4
POLR1E	-0.569102	-0.469021	-0.477841	1.77748	-0.261512	4
CORO1C	-0.645183	-0.588324	-0.544828	1.71365	0.0646868	4
COX6A1	-0.455523	-0.516741	-0.230888	1.77383	-0.570682	4
CPNE1	-0.343966	-0.605224	-0.360878	1.77909	-0.469026	4
SEPTIN11	-0.616019	-0.608424	0.227652	1.66066	-0.663869	4
UBA7	-0.530957	-0.383415	-0.313446	1.7799	-0.55208	4
SEC22B	-0.609368	-0.961467	-0.0774494	1.64263	0.00565786	4
SP100	-0.354982	-1.10337	0.939887	1.16443	-0.645972	4
ATIC	-0.535182	-0.836053	0.248415	1.63903	-0.516208	4
GGT7	-0.447214	-0.447214	-0.447214	1.78885	-0.447214	4
LMAN1	0.314863	0.433533	-1.7713	0.67304	0.349869	4
ST13P5	-0.62654	-1.21755	0.0443525	1.40163	0.39811	4
POLR2B	0.581326	0.309727	-1.74771	0.697316	0.159341	4
CLCA1	0.404271	-0.365675	-1.53979	1.07082	0.430381	4
PUM1	-0.637196	-0.527459	-0.689823	1.67569	0.178785	4
MACROD1	-0.366104	0.170283	-1.22678	1.52373	-0.101126	4
USP15	0.48125	-0.687364	-1.3986	0.96405	0.640664	4
MFGE8	0.257325	0.376006	-1.77247	0.600587	0.538554	4
KRT4	-0.34946	-0.624315	-1.0735	1.37007	0.677206	4
LNPK	0.257059	0.593022	0.0540202	0.807041	-1.71114	4
NUDC	0.718662	-1.32788	-0.827748	0.681985	0.754979	4
ACSL1	-0.539067	1.02324	-0.959717	1.14007	-0.664518	4
HDAC1	0.61339	0.0921803	-1.74654	0.62784	0.413128	4
PSPC1	0.435372	-1.78497	0.479094	0.524455	0.346049	4
RUFY1	-0.596709	0.790181	-0.497183	1.31938	-1.01567	4
DDAH1	0.763696	0.157025	-1.62133	0.859218	-0.158612	4
CLMN	-0.406522	-0.907016	1.05602	1.09409	-0.836571	4
PPP1R10	-0.845203	-0.186273	-1.03585	1.17689	0.890433	4
MDN1	-0.974116	-1.17449	0.49385	0.998667	0.656087	4
TNFAIP2	0.594399	0.418165	-1.73791	0.66961	0.0557394	4
ST13	-0.578068	-1.21462	-0.0103443	1.43301	0.370022	4
TXNDC17	-0.510584	-0.776009	-0.880969	1.16073	1.00683	4
CRKL	0.0817229	-1.7215	0.404964	0.844751	0.390065	4
ADD2	0.620156	-1.76831	0.208852	0.51288	0.426419	4
FBLN5	0.565112	-1.03364	0.646553	0.954625	-1.13265	4
WASF1	0.587893	-1.76764	0.211573	0.574618	0.393555	4
CPNE5	-0.754285	-0.710157	-0.721778	1.18252	1.0037	4
LEMD2	-0.575268	-1.44369	0.748539	0.965	0.305421	4
OPA1	-0.817363	-1.28047	0.650184	1.0568	0.390848	4
CSTA	-0.405891	-1.56867	0.449072	0.830879	0.694614	4
PXN	0.364643	-1.77761	0.566294	0.541718	0.304954	4
LRBA	0.235841	0.463941	0.38314	0.682464	-1.76539	4
PRMT1	0.188946	0.496247	-1.75628	0.708606	0.362481	4
SCFD1	0.181169	-1.73262	0.253964	0.820454	0.477034	4
COL4A2	0.545262	-1.76379	0.356218	0.646878	0.215427	4
U2AF2	0.643562	-0.920705	-0.307858	1.40431	-0.819309	4
MAPRE2	0.415367	-1.17308	0.698725	1.0198	-0.960807	4
LAMC2	-0.558666	0.6394	-1.46407	0.990629	0.392705	4
TPM2	0.925983	-0.672525	-0.78193	1.24892	-0.720449	4
NFKB1	0.5108	0.37962	-1.36089	1.13864	-0.668164	4
EPHB2	-0.87906	-0.639389	-0.637763	1.28675	0.869457	4
HNRNPA1	0.512696	0.532039	-1.75723	0.593292	0.119208	4
COMT	-0.812835	-0.422538	-0.897663	1.26657	0.866467	4
D0.00001JB1	0.319425	-1.77515	0.329663	0.608324	0.517742	4
CORO1B	0.24851	0.26764	-1.74953	0.766938	0.466441	4
FES	-1.16205	0.0646658	-0.466801	1.55805	0.00613063	4
FER1L4	-0.800537	0.670809	-1.34339	0.835055	0.638066	4
ACO1	0.368403	0.41021	-1.75166	0.76428	0.208763	4
PML	-0.870858	-0.55159	-0.751582	1.15512	1.01891	4
RAP1B	0.365626	0.0832338	0.513409	0.770428	-1.7327	4
CYGB	0.763492	-1.19923	-0.382796	1.27454	-0.456002	4
CRYZ	0.329625	-0.312397	-1.38357	1.37094	-0.00460177	4
RAB6D	0.624257	-1.24412	-0.918768	0.900954	0.637673	4
UBR7	-0.791198	-0.760523	-0.629917	1.1884	0.993239	4
RANBP2	0.490801	0.430615	-1.78785	0.464305	0.402128	4
COPS7A	0.472579	-1.77596	0.36454	0.625977	0.312867	4
LMNB2	0.546093	-1.77861	0.265774	0.497118	0.46963	4
FAM98A	-0.952708	-0.467129	-0.733607	1.16972	0.98372	4
RAD23B	0.414778	0.585462	0.137864	0.618076	-1.75618	4
SRP72	-0.995755	-0.498825	-0.522691	1.4839	0.533374	4
TM9SF1	-0.407875	-0.631925	-0.112071	1.75032	-0.598445	4
GLG1	0.231034	0.214332	0.415045	0.86561	-1.72602	4
SF3A3	0.434405	0.0452729	-1.61075	1.10176	0.0293079	4
PKP2	0.481925	0.512531	-1.78643	0.3886	0.403376	4
UGT1A7	-0.872574	-0.706416	-0.601652	1.09187	1.08878	4
PDIA6	0.440091	-1.78758	0.496073	0.459848	0.391568	4
PTPRJ	0.511579	0.178044	-1.74874	0.73888	0.320237	4
SLC27A2	0.335188	0.543445	0.261579	0.628612	-1.76882	4
HARS2	0.41081	-1.7817	0.414745	0.595686	0.360457	4
HDLBP	0.637962	-1.72948	0.0981985	0.719046	0.274276	4
ACTN3	0.528473	0.77696	-1.11254	0.8681	-1.061	4
MYO6	0.699133	-1.16049	0.639273	0.843774	-1.02169	4
CCT2	-0.783108	-1.34508	0.522867	0.890905	0.714419	4
PLXNB1	-0.7775	-0.700157	-0.697427	1.25091	0.924179	4
LASP1	0.552634	-0.485782	-1.52185	0.932511	0.52249	4
PRNP	0.206543	-1.76004	0.338237	0.66581	0.54945	4
LMAN2	0.526618	0.252647	-1.77255	0.605238	0.388051	4
ENDOD1	0.652476	-1.06671	-1.11246	0.892664	0.634029	4
NES	-1.1185	-0.445751	0.880026	1.2201	-0.535874	4
GTF3C1	-1.03796	-0.658878	-0.253596	1.48615	0.464278	4
PYGM	0.728563	0.434776	-1.18662	0.979066	-0.955781	4
CES1	-0.0174498	-1.71376	0.681432	0.67876	0.371019	4
ALDH3A2	0.531229	-1.75709	0.208456	0.694985	0.322425	4
ALYREF	0.568251	0.124821	-1.74263	0.717106	0.332449	4
SPAG9	0.566349	-1.77567	0.25699	0.534125	0.418209	4
GALNT2	1.06737	-0.830851	-0.723107	1.11769	-0.631103	4
HSP90AA5P	0.216179	-1.76087	0.674213	0.533142	0.337337	4
YES1	0.77673	-1.16443	-1.01734	0.799352	0.605685	4
ADA2	0.378904	0.150564	0.315836	0.876721	-1.72203	4
NIBAN2	-0.0464713	-1.16499	-0.787784	1.10339	0.89586	4
DKK3	0.20203	0.398156	0.490267	0.672507	-1.76296	4
0.0001	0.630911	0.167879	-1.76281	0.510399	0.453618	4
CTPS1	0.106941	-1.26772	0.791756	1.10279	-0.733769	4
GGCT	0.426037	0.558781	-1.76903	0.578226	0.205989	4
MRPS15	0.651895	0.665182	-1.17814	0.861901	-1.00084	4
ADPGK	-0.607297	-1.45112	0.41894	0.874546	0.764927	4
CAPZB	-0.732468	-0.9443	-0.484974	1.08443	1.07731	4
CTNND2	-0.950661	-0.507454	-0.678592	1.28686	0.849848	4
STAM	0.606935	-0.750432	-1.37571	0.864223	0.654988	4
HLA-E	0.691662	-0.905072	-1.26637	0.784013	0.695764	4
QARS1	0.378543	0.745299	-1.68522	0.670356	-0.108973	4
DHX30	-0.88597	1.0072	-0.67773	1.16888	-0.612378	4
MEGF8	0.422631	-1.76186	0.220886	0.705941	0.412405	4
PDS5B	-0.902865	-0.455003	1.02502	1.13383	-0.800982	4
LRRC47	0.562646	-1.61627	-0.332077	0.673704	0.711999	4
NMRAL1	0.673548	-1.6449	-0.268246	0.633724	0.605872	4
PTPRS	-1.00432	-0.409771	-0.708925	1.24487	0.878155	4
CAD	0.47679	-1.78707	0.370969	0.481749	0.45756	4
FNDC3A	1.08455	-0.950564	-0.474522	1.07499	-0.734449	4
RAB6C	0.61103	-1.24326	-0.919446	0.901738	0.649942	4
ART3	-0.0198464	-1.63947	0.0701249	0.943011	0.646182	4
MYO1G	-0.756041	-0.720736	-0.711313	1.16153	1.02656	4
HCLS1	0.782826	-1.52515	-0.476679	0.822696	0.396305	4
GPA33	1.04816	-0.693686	-1.04608	1.08293	-0.391324	4
ST13P4	-0.52187	-1.20235	-0.097347	1.46463	0.356933	4
SNCA	0.300468	-1.0048	-0.993826	0.364039	1.33412	5
ELF1	-0.312875	-0.49761	-0.502287	-0.470671	1.78344	5
VAT1	-0.497412	-0.295173	-0.512196	-0.477185	1.78197	5
ESAM	-0.484999	-0.399593	-0.474323	-0.428873	1.78779	5
DT0.00001	-0.309853	-0.54326	-0.539527	-0.387204	1.77984	5
ITPR3	0.006707	-0.555799	-0.586663	-0.594427	1.73018	5
EXOSC3	-0.449381	-0.695185	-0.22535	-0.393388	1.7633	5
IBA57	-0.677617	-0.450106	-0.226596	-0.411372	1.76569	5
TBCE	-0.502369	-0.291887	-0.589586	-0.393738	1.77758	5
NUDT5	-0.489589	-0.486386	-0.365628	-0.445017	1.78662	5
KRT222	-0.462529	-0.457276	-0.407689	-0.460895	1.78839	5
CSTF3	-0.144522	-0.455834	-0.697149	-0.456588	1.75409	5
KLC4	-0.623471	-0.394444	-0.355381	-0.405696	1.77899	5
EML3	-0.327999	-0.46744	-0.465099	-0.523663	1.7842	5
MOCS3	-0.427487	-0.0202419	-0.683167	-0.59874	1.72964	5
SCCPDH	-0.736569	-0.632886	-0.17122	-0.189028	1.7297	5
STT3B	-0.269693	-0.515503	-0.535618	-0.458155	1.77897	5
AP2M1	-0.531779	-0.888057	0.91553	-0.738607	1.24291	5
TLE3	-0.443742	-0.453326	-0.44662	-0.445155	1.78884	5
A0.00001PC2	-0.531559	-0.521166	-0.246549	-0.477525	1.7768	5
PLIN2	-0.365649	-0.4976	-0.518221	-0.403778	1.78525	5
DOCK5	-1.07393	-0.509615	1.00831	-0.550482	1.12572	5
FGL1	-0.395451	-0.412257	-0.502416	-0.476978	1.7871	5
DDI2	-0.5211	-0.220288	-0.622145	-0.40526	1.76879	5
FBXO3	-0.467191	-0.437779	-0.436782	-0.44697	1.78872	5
EIF3H	-0.341598	-0.463893	-0.556717	-0.421251	1.78346	5
RPTOR	-0.479237	-0.454377	-0.465732	-0.388418	1.78776	5
COX5A	-0.416374	-0.119359	-0.645231	-0.571138	1.7521	5
MGAM	-0.420256	-0.433243	-0.487156	-0.447636	1.78829	5
SUSD2	-0.350523	-0.49111	-0.503573	-0.440404	1.78561	5
DNM1	-0.391378	-0.472393	-0.475301	-0.448767	1.78784	5
UBQLN2	-0.320372	-0.470011	-0.473609	-0.519809	1.7838	5
LMAN2L	-0.372268	-0.202929	-0.709641	-0.473654	1.75849	5
TP53BP1	-0.44885	-0.338399	-0.515492	-0.482147	1.78489	5
CDC42BPB	-0.422951	-0.448425	-0.470723	-0.4465	1.7886	5
0.00001NS	-0.465669	-0.291009	-0.617237	-0.402461	1.77638	5
EIF2S1	-0.426238	-0.467925	-0.460707	-0.433709	1.78858	5
PSMD6	-0.382197	-0.433366	-0.516073	-0.455155	1.78679	5
ITGAL	-0.437881	-0.463465	-0.415889	-0.471193	1.78843	5
BTAF1	-0.475541	-0.399517	-0.470359	-0.442624	1.78804	5
HTT	-0.428875	-0.442723	-0.473076	-0.443949	1.78862	5
CASP2	-0.491245	-0.487274	-0.364828	-0.443193	1.78654	5
TANGO2	-0.347615	-0.487776	-0.462562	-0.48789	1.78584	5
GSDMA	-0.488181	-0.541284	-0.258014	-0.490571	1.77805	5
HSPA12A	-0.46291	-0.471738	-0.470082	-0.382892	1.78762	5
DNM3	-0.448226	-0.448986	-0.468404	-0.423006	1.78862	5
PI4KB	-0.447214	-0.447214	-0.447214	-0.447214	1.78885	5
TSC22D2	-0.448669	-0.901375	-0.226082	-0.131996	1.70812	5
IMPDH1	-0.645896	-0.645896	0.30887	-0.645896	1.62882	5
MMAA	-0.447214	-0.447214	-0.447214	-0.447214	1.78885	5
LILRB5	-0.447214	-0.447214	-0.447214	-0.447214	1.78885	5
DDTL	-0.430489	-0.452761	-0.452761	-0.452761	1.78877	5
FAM241B	-0.670255	0.443829	-0.670255	-0.670255	1.56694	5
MRPS17	-0.596364	-0.675647	0.327815	-0.675647	1.61984	5
SPINK1	-0.587057	-0.587057	0.0393884	-0.587057	1.72178	5
PDCD4	-0.25684	-0.599536	-0.599536	-0.310144	1.76606	5
GPN2	-0.447214	-0.447214	-0.447214	-0.447214	1.78885	5
LRCH1	-0.6166	-0.262045	-0.994248	0.300544	1.57235	5
ZNF830	-0.25416	-0.721746	-0.721746	-0.00339495	1.70105	5
GOLPH3	-1.06901	0.771296	-0.533004	-0.488296	1.31901	5
SELL	-0.467894	-0.613909	-0.618815	-0.0371621	1.73778	5
NDRG1	-0.753716	-0.334319	-0.342743	-0.328428	1.75921	5
SHMT2	-0.0157382	-0.825443	-0.757723	-0.0567031	1.65561	5
ARPC5	-0.803411	-0.0248117	-0.476361	-0.414486	1.71907	5
STOM	-0.671711	-0.467072	-0.0709435	-0.533973	1.7437	5
HLA-A	-0.320219	-0.769437	-0.371734	-0.293855	1.75525	5
BCL2L13	-0.34778	-0.48979	-0.44693	-0.501087	1.78559	5
PLEC	-0.76581	-0.920147	0.0388277	0.0461198	1.60101	5
ALDH3B1	-0.18847	-0.576416	-0.621669	-0.37548	1.76203	5
CASP3	-0.0379155	-0.141479	-0.776273	-0.730325	1.68599	5
CCT7	-0.510425	-0.729077	-0.0515995	-0.443435	1.73454	5
PPIL3	-1.03087	-0.275342	-0.427225	0.0997292	1.63371	5
SF3B3	-0.675023	-0.530005	-0.262167	-0.29557	1.76277	5
GK	-0.671967	-0.190932	-0.668027	-0.207646	1.73857	5
PIP4K2C	-0.85889	-0.288039	-0.316434	-0.27044	1.7338	5
CCAR1	-0.312039	-0.435854	-0.596924	-0.434857	1.77967	5
CCNL1	-0.193981	-0.264	-0.874097	-0.392596	1.72467	5
DTNB	-0.265598	-0.560089	-0.559688	-0.389641	1.77502	5
NT5E	-0.759459	-0.00315075	-0.374228	-0.579833	1.71667	5
COMMD2	-0.4485	-0.55656	-0.451147	-0.326715	1.78292	5
ALDH7A1	-0.579293	-0.267125	-0.374598	-0.552957	1.77397	5
GK3P	-0.675926	-0.184186	-0.671899	-0.204618	1.73663	5
TRAP1	-0.700848	-0.776574	1.07997	-0.712434	1.10989	5
EPHB1	-0.631848	-0.307963	-0.304389	-0.52665	1.77085	5
CPSF6	-0.555835	0.996234	-0.863702	-0.753488	1.17679	5
RBM39	-0.513629	-0.36352	-0.784934	-0.0652429	1.72733	5
APRT	-0.291453	-0.521685	-0.499153	-0.469175	1.78147	5
COL15A1	-0.113112	-0.616555	-0.879443	-0.0726651	1.68177	5
CTBP1	-0.664381	-0.0807948	-0.678454	-0.307599	1.73123	5
ALDH3B2	-0.132652	-0.601228	-0.656167	-0.359552	1.7496	5
ETFA	0.548876	0.427798	-1.78407	0.345124	0.462274	5
ITGA2	0.479531	-1.52434	-0.49712	0.698432	0.8435	5
STAU1	1.02668	-0.992517	-0.639536	-0.524536	1.12991	5
DPP9	-0.175512	-0.918308	-0.387567	-0.228442	1.70983	5
PSMD3	0.801513	-0.0822774	-1.61947	0.0482926	0.85194	5
CALHM5	0.325487	0.531554	-1.77682	0.334509	0.585267	5
CCDC6	0.366517	-1.08796	0.578515	-1.00954	1.15246	5
ALDH6A1	-1.2689	-0.375974	-0.0154363	0.170618	1.48969	5
FCGRT	-0.726207	0.792301	0.25148	-1.32738	1.0098	5
HSPA12B	0.82502	-1.0464	-1.12685	0.522922	0.825313	5
SYTL2	-1.05475	-0.598618	0.860249	-0.462105	1.25522	5
TRIM28	1.01269	-0.265619	-1.12955	-0.690489	1.07297	5
TWF2	0.40537	-1.77561	0.283667	0.465465	0.621105	5
TFG	0.225994	0.437451	-1.76205	0.392337	0.706268	5
PLX0.000014	0.909321	-0.727534	-0.884977	-0.546573	1.24976	5
HDAC2	0.997869	-0.708001	-0.751185	-0.726501	1.18782	5
D2HGDH	-0.324118	-1.54245	0.155161	0.738914	0.972489	5
RAD21	-0.996565	-0.532361	-0.568438	0.731778	1.36559	5
GSK3A	0.201002	0.758742	-1.67348	-0.048516	0.76225	5
UNC45A	-0.667159	-0.490361	-0.978965	0.876165	1.26032	5
RGN	-0.295044	-1.62747	0.622693	0.523868	0.775954	5
MZB1	0.531362	0.403057	-0.123902	-1.67242	0.8619	5
NFATC1	-0.741969	0.412142	-0.741969	-0.502064	1.57386	5
ADD1	-0.640116	-0.585435	-0.923982	0.870405	1.27913	5
RPL9	-0.843726	-1.13939	0.760945	0.0348882	1.18729	5
MYO1C	0.549235	-0.271863	-1.50166	0.0553673	1.16892	5
TOMM40L	-0.646438	0.615399	-1.03245	-0.354813	1.4183	5
JAK1	-0.423501	-0.555895	-0.555895	-0.238348	1.77364	5
SPARCL1	-0.513493	0.82226	-1.35195	-0.0650664	1.10825	5
MMRN1	0.293164	0.384184	0.450252	-1.77376	0.646157	5
UBE2V2	0.0908683	0.317426	-1.72804	0.529523	0.790226	5
PRKACB	0.134858	-1.7571	0.520131	0.460064	0.642045	5
MCM7	0.576374	-1.21553	0.809343	-0.957097	0.786905	5
FUCA1	0.282697	0.108922	-1.5184	-0.132252	1.25904	5
PRELP	0.860734	0.245086	-1.30674	-0.757248	0.958166	5
EVPL	0.567185	0.411673	-1.77965	0.297796	0.502993	5
GALK1	0.459431	0.204571	0.350316	-1.75414	0.739824	5
DDX42	0.430777	0.202963	0.411179	-1.75904	0.714117	5
COASY	-0.645049	-0.622765	0.0961612	-0.532307	1.70396	5
LRCH2	-0.616305	-0.263004	-0.993923	0.300765	1.57247	5
TSPO	-0.422834	-0.32366	-0.226091	-0.777111	1.7497	5
TMEM179B	-0.447214	-0.447214	-0.447214	-0.447214	1.78885	5
HYAL1	-0.313131	-0.578424	-0.797077	-0.0235266	1.71216	5
PPAN	-0.440293	-0.316885	-0.741865	-0.258396	1.75744	5
DDX50	-1.77375	0.327219	0.636853	0.323023	0.486651	6
SNX27	-1.62621	-0.065029	0.215554	0.409266	1.06642	6
NGLY1	-1.56897	0.602205	0.850073	0.530701	-0.414006	6
FLAD1	-1.61253	-0.0112665	0.011459	1.0294	0.582937	6
TOMM34	-1.33901	-0.521743	0.0566108	0.512082	1.29206	6
LARP7	-1.78343	0.465344	0.34482	0.558372	0.414897	6
AKR1B10	-1.75825	0.644571	0.276957	0.600496	0.236222	6
LNPEP	-1.18277	0.853802	0.63388	0.691282	-0.996197	6
H1-3	-1.54039	-0.45443	0.579221	0.911823	0.503772	6
EIF4B	-1.06197	0.597095	-1.10654	0.953927	0.617487	6
OXSR1	-1.18355	-0.998831	0.70796	0.819044	0.655373	6
SAMM50	-1.18153	0.809316	0.494522	0.859977	-0.982286	6
TMEM205	-1.4208	-0.402387	1.03718	0.859244	-0.0732368	6
PRPH	-1.00564	0.958466	-1.12736	0.821063	0.353473	6
DCXR	-1.25765	0.797279	-0.166986	1.19629	-0.568931	6
H1-2	-1.55289	-0.445621	0.608313	0.858811	0.531383	6
RAP1A	-1.04121	0.407724	0.762087	0.975073	-1.10367	6
TBC1D5	-1.10813	0.687856	0.517292	0.958121	-1.05514	6
WDR11	-1.38576	0.543701	0.822693	-0.734305	0.753674	6
PIGG	-1.46006	-0.422541	1.15801	0.154685	0.569907	6
SFTPA1	-1.07165	-0.629865	1.05941	1.0715	-0.4294	6
WAS	-1.46592	-0.0331976	0.971754	-0.355427	0.882796	6
ERCC5	-1.70289	0.945248	0.180694	0.349987	0.226965	6
IPO9	-0.952984	-1.21857	0.66438	0.631681	0.875493	6
UFL1	-1.27289	-0.869475	0.956351	0.647134	0.538876	6
HGH1	-1.36968	-0.127037	0.76361	-0.425919	1.15902	6
GSTP1	-1.49202	1.19858	-0.272344	0.509904	0.0558819	6
PSMD5	-1.76414	0.263413	0.309828	0.677062	0.513834	6
HK3	-1.78285	0.415307	0.501129	0.539263	0.327152	6
HAPLN4	-1.45902	1.14746	0.072632	-0.390823	0.629744	6
HRAS	-1.75734	0.473234	0.134162	0.640622	0.509322	6
KIF5C	-1.3949	0.616812	0.591069	-0.714874	0.901888	6
TRIM16	-1.76985	0.365771	0.247535	0.534801	0.621741	6
FCGR2A	-1.04885	0.56847	-1.1287	0.740467	0.868615	6
GBE1	-1.70976	0.504662	-0.0719827	0.664968	0.612111	6
DHX38	-1.7872	0.452897	0.476143	0.483177	0.374986	6
BCAT2	-1.7744	0.45611	0.235569	0.511247	0.571478	6
ARF5	-1.1752	-0.651767	-0.235783	1.10573	0.957016	6
HTRA1	-1.42941	0.601967	-0.316301	-0.0763124	1.22006	6
ELOVL1	-1.63801	0.690253	0.915944	-0.00648302	0.0382996	6
PTGFRN	-1.45218	1.19676	0.623855	-0.153579	-0.214855	6
TPR	-1.76943	0.522362	0.451147	0.592867	0.203055	6
SYNM	-1.74431	0.339039	0.75273	0.503631	0.148914	6
POLR2L	-1.63146	0.934897	-0.0975998	0.133034	0.661127	6
PSMA1	-1.53493	1.27316	0.0932317	0.0753304	0.0931993	6
IGFBP7	-1.77384	0.465176	0.259535	0.426015	0.62311	6
ARMC8	-1.58946	-0.379162	0.812075	0.606386	0.550163	6
H1-5	-1.58046	0.620133	-0.414785	0.692719	0.682396	6
EXOC8	-1.16051	0.675083	0.608885	0.891979	-1.01544	6
HEBP2	-1.2321	-0.387124	0.877873	1.17274	-0.431392	6
MVB12B	-1.51746	1.25448	0.311657	-0.136786	0.0881114	6
SERPINB1	-1.34427	1.25023	0.0668126	-0.545413	0.572639	6
FAH	-1.6375	0.319028	1.07317	-0.00973054	0.255025	6
MAP2	-1.14095	-1.04594	0.667518	0.806564	0.712813	6
RBMX	-1.54937	1.24478	0.0765261	0.209148	0.0189194	6
PABPC1	-1.07313	0.738288	-1.11347	0.8099	0.638412	6
PNO1	-1.72629	0.875982	0.367483	0.219244	0.263578	6
EIF3G	-1.16595	0.833809	-0.24363	1.2153	-0.639531	6
TOM1L2	-1.27327	-0.770991	0.367241	0.489724	1.18729	6
CYCS	-1.70859	0.343671	0.107913	0.912169	0.344837	6
H1-1	-1.77446	0.350508	0.433799	0.653263	0.336892	6
MGST1	-1.25772	-0.441159	0.846374	-0.329981	1.18249	6
PARK7	-1.5083	1.06913	0.717898	-0.257175	-0.0215577	6
ARFGEF2	-1.13817	0.656198	-1.03012	0.942582	0.569517	6
PTPRC	-1.75428	0.144821	0.432235	0.484291	0.692935	6
MTARC2	-1.68667	-0.147694	0.593915	0.545294	0.695157	6
ERAP2	-1.43155	-0.00842765	0.680932	1.15375	-0.394703	6
SFXN1	-1.74681	0.309075	0.802984	0.376038	0.258714	6
SIRPA	-1.30559	-0.835132	0.496894	0.824333	0.819492	6
TNKS1BP1	-1.77015	0.393794	0.227895	0.580052	0.568411	6
FKBP15	-1.7807	0.504048	0.376168	0.331708	0.568777	6
LAP3	-1.76373	0.651474	0.216655	0.539593	0.356007	6
PCBP2	-1.63115	0.247457	1.10646	0.0507685	0.226464	6
ATP1A3	-1.31267	0.540617	-0.833811	0.804985	0.800875	6
MATR3	-1.22544	0.994097	1.03012	-0.144524	-0.654255	6
DAP3	-1.20802	0.795177	-0.973339	0.703792	0.682394	6
H1-6	-1.77523	0.368216	0.421909	0.650271	0.334835	6
MTTP	-1.31463	-0.829966	0.60603	0.895887	0.642675	6
PRPF6	-1.29948	0.539317	-0.844702	0.900322	0.704544	6
RPL22	-1.56567	-0.190898	0.801726	0.0226579	0.932182	6
SPEN	-1.77996	0.459372	0.283365	0.48313	0.554091	6
GALM	-1.21116	-0.93681	0.436078	0.860539	0.851349	6
SKIV2L	-1.38541	-0.71861	0.528761	0.93581	0.639452	6
KRT73	-1.75381	0.693275	0.390171	0.517644	0.152722	6
ALDH3A1	-1.74148	0.18213	0.290787	0.784106	0.484456	6
G0.00001Q	-1.69535	0.348413	0.827077	-0.0443843	0.564244	6
SCARB2	-1.71793	0.258578	0.0748898	0.786776	0.597686	6
VAMP3	-1.38451	-0.2212	-0.185495	0.450875	1.34033	6
DST	-1.76165	0.387045	0.520618	0.662687	0.191298	6
TTN	-1.08544	-1.06099	1.03059	0.633657	0.482184	6
XYLB	-1.12325	0.713659	0.67102	0.803245	-1.06468	6
SUPT6H	-1.76585	0.504487	0.166462	0.538642	0.556258	6
CLNS1A	-1.73035	0.86521	0.345633	0.297847	0.221658	6
CAST	-1.27055	0.746349	-0.866402	0.931018	0.459586	6
FARP1	-1.59168	1.10389	0.081014	0.485052	-0.0782786	6
TUT1	-1.76072	0.243824	0.627167	0.604974	0.284755	6
HSPD1	-1.62142	0.0460441	0.982572	0.633824	-0.0410153	6
MFN2	-1.47368	0.964885	0.0366501	0.862354	-0.390207	6
NFYA	-1.47863	0.515481	-0.566213	0.934759	0.594606	6
ANP32A	-1.71143	0.708575	0.658972	-0.0224283	0.366312	6
ICAM2	-1.51238	0.0598672	1.2271	0.410993	-0.185576	6
TRIP10	-1.06023	-0.503107	1.11638	1.02242	-0.575462	6
NELFA	-1.45147	0.83667	0.298552	0.884101	-0.567856	6
SERPI0.0000111	-1.06326	1.03042	0.943956	0.0452439	-0.956353	6
MYDGF	-1.75428	0.31888	0.184343	0.67179	0.579264	6
CDC37	-1.6156	0.125278	0.828278	0.815242	-0.153195	6
RBMXL2	-1.53004	1.27277	0.0538314	0.189544	0.0138976	6
CRYL1	-1.69594	0.854719	0.10626	0.603973	0.130991	6
WRNIP1	-1.72924	0.718168	0.210769	0.654406	0.145898	6
USP39	-1.28733	-0.87191	0.585571	0.759816	0.813849	6
AAK1	-1.46961	1.07619	-0.401702	0.0777266	0.717399	6
ABLIM1	-1.48558	-0.410592	0.80527	0.109	0.981901	6
SFTPA2	-1.07165	-0.629865	1.05941	1.0715	-0.4294	6
MERTK	-1.00446	0.709517	-1.18145	0.769326	0.707071	6
MRPS18A	-1.607	0.282555	1.14999	0.0888823	0.0855729	6
ASPH	-1.26077	0.910708	-0.892744	0.698207	0.544599	6
CPA2	-1.0093	-1.17166	0.64196	0.847406	0.691597	6
KIAA1217	-1.22739	0.686665	-0.951464	0.704758	0.787429	6
RRS1	-1.76582	0.532896	0.301101	0.657074	0.27475	6
DYNLRB1	-1.16867	1.17613	-0.495424	0.909727	-0.421761	6
B4GAT1	-1.78813	0.446234	0.489551	0.442678	0.40967	6
PTGIS	-1.1345	0.751067	-0.786704	1.23518	-0.0650462	6
ATP5PF	-1.71986	0.0154124	0.704022	0.651475	0.348952	6
MVP	-1.44161	0.868701	1.02035	-0.337515	-0.109929	6
PGK2	-1.71201	0.657171	0.380221	0.701332	-0.0267149	6
HNRNPF	-1.52102	0.463989	1.20799	-0.0926928	-0.0582693	6
PREB	-1.1103	-1.07059	0.575109	0.780092	0.825693	6
SYK	-1.04276	0.671373	-1.14531	0.759464	0.75723	6
HPRT1	-1.59641	0.105377	-0.142483	0.609535	1.02398	6
PKN1	-1.35703	0.588815	0.402884	-0.706917	1.07225	6
EIF2AK4	-1.65315	-0.137581	0.254137	0.729544	0.807054	6
NRCAM	-1.27825	0.193317	-0.774062	0.957691	0.901307	6
EIF3K	-1.70063	0.913911	0.354974	0.379313	0.0524301	6
PPIE	-1.47807	0.120447	-0.251302	0.333658	1.27527	6
ACSM2B	-1.7842	0.406704	0.459593	0.555726	0.362175	6
ATP13A1	-0.890985	-1.27735	0.698485	0.791527	0.678324	6
CASTOR2	-1.25936	-0.337427	-0.445055	0.927312	1.11453	6
CDSN	-1.36503	-0.351159	-0.0137593	1.37331	0.35664	6
SSRP1	-1.12735	-1.02015	0.551154	1.03314	0.563213	6
FTH1	-1.39654	-0.156929	-0.301373	1.25452	0.600327	6
MUC5B	-1.75952	0.725525	0.227746	0.42326	0.382991	6
ABCC2	-0.913693	0.640868	0.49657	1.00232	-1.22606	6
ANTXR1	-1.7454	0.658374	0.218814	0.652448	0.215764	6
STK3	-1.77733	0.576691	0.425291	0.504022	0.271326	6
TMEM68	-1.71818	0.760235	0.634489	0.248386	0.0750676	6
EIF5B	-1.67636	0.331046	0.531045	0.890196	-0.0759248	6
SYNCRIP	-1.71203	0.926028	0.314519	0.209772	0.261713	6
DNM2	-1.07345	0.817025	-1.10195	0.826349	0.532019	6
DARS1	-1.72698	0.21709	0.146848	0.781234	0.581812	6
CLPX	-1.71437	0.229243	0.921777	0.277648	0.285701	6
ARSD	-1.78458	0.532675	0.346018	0.425837	0.480054	6
PRPSAP2	-1.78783	0.415072	0.503061	0.443227	0.426466	6
LOXL4	-1.21259	0.873535	-0.57585	1.17034	-0.255436	6
DNM1L	-1.53993	-0.489148	0.75514	0.575181	0.698761	6
TRIM16L	-1.7768	0.543444	0.250674	0.522713	0.459971	6
PLOD1	-1.25671	-0.889245	0.464147	0.829802	0.852007	6
PTPN11	-1.7835	0.386411	0.497445	0.543812	0.355836	6
RFTN1	-1.65209	-0.223579	0.486149	0.791953	0.597566	6
AFG3L2	-1.25938	0.789748	0.740728	-0.911709	0.640609	6
SWAP70	-1.76306	0.594868	0.266463	0.624333	0.277399	6
PPP2R1B	-1.77616	0.529313	0.58506	0.374552	0.287235	6
SUN1	-1.77367	0.289675	0.360822	0.493701	0.629476	6
VPS39	-1.1088	0.778179	-1.07166	0.830285	0.571994	6
SNRPD1	-1.28366	-0.777473	0.317739	0.619614	1.12378	6
CD2AP	-1.3072	-0.787578	0.35871	1.0009	0.735171	6
CWC27	-1.55778	-0.151653	1.17464	0.150082	0.384713	6
ARG1	-1.41665	0.103839	-0.388469	1.28895	0.412336	6
CREG1	-1.19324	1.15595	0.817561	-0.0246539	-0.755608	6
DDRGK1	-1.77567	0.413595	0.649672	0.348411	0.363987	6
CDH1	-1.51948	1.24763	0.179167	0.26791	-0.175227	6
PTGR1	-1.41316	0.826238	0.582845	-0.698177	0.702251	6
AP3D1	-1.05834	0.626525	-1.12735	0.757555	0.801609	6
PA2G4	-1.74267	0.426388	0.134842	0.771318	0.410117	6
COX2	-1.11924	1.03076	-0.787257	-0.145923	1.02165	6
FAM114A1	-1.76106	0.5969	0.349902	0.617418	0.196838	6
P4HB	-1.72359	0.632138	0.662487	-0.00770728	0.436675	6
CDK11A	-1.10716	-1.08279	0.704827	0.775597	0.709527	6
CDK11B	-1.10665	-1.08332	0.704986	0.775352	0.709629	6
IMPAD1	-1.59957	0.498504	-0.347965	0.829248	0.619784	6
LCN1	-1.17604	0.637218	0.407131	1.07492	-0.943228	6
LCN1P1	-1.13212	0.752859	0.515345	0.900634	-1.03672	6
SMN1	-1.72171	0.866048	0.315315	0.412075	0.128269	6

## Sheet: Table S4C
Table S4C : List of significantly enriched terms in the functional enrichment analysis on DEPs
Cluster	pathway	p-value	Genes
C1	Integrin	7.21e-07	BCAN; DOCK8; NCAN; COL7A1; ITGA1; DOCK1; MAP2K2; GPC4; ITGAM; ACAN; DOCK10; KRAS
C1	Thiamine metabolism - Homo sapiens (human)	7.72e-05	AK1; ALPP; ALPG; ACP1
C1	Pyruvate metabolism and Citric Acid (TCA) cycle	0.000197008	IDH3G; PDK2; PDK1; DLAT; PDK4; BSG
C1	Glycine, serine and threonine metabolism - Homo sapiens (human)	0.00377548	SARDH; BHMT; SHMT1; GCSH
C1	RHO GTPase cycle	0.00526074	TWF1; DOCK8; LBR; ARAP1; STK10; DOCK1; RAB7A; ROCK2; FLOT1; ARHGAP25; SLK; NCF1; DOCK10; NSFL1C; CUL3
C1	Folate biosynthesis - Homo sapiens (human)	0.00811419	QDPR; ALPP; ALPG
C2	Regulation of actin cytoskeleton - Homo sapiens (human)	0.00161926	ITGB2; PIKFYVE; ARPC3; ITGA2B; PPP1CA; VCL; ITGA5; MAPK3; PAK2
C2	Vesicle-mediated transport	0.00175176	LRP2; COPA; TMED2; VPS36; ARPC3; CHMP4A; CHMP4B; CBL; EPN2; DENND3; ARFGAP2; ACTR1A; COL3A1; APP; DCTN5; LDLRAP1; TMED10
C2	Protein digestion and absorption - Homo sapiens (human)	0.00178539	COL8A1; COL11A2; COL18A1; CELA2B; COL3A1; SLC1A1
C2	Extracellular matrix organization	0.00315042	MFAP4; COL8A1; ITGB2; COL11A2; COL18A1; ITGA2B; ITGA5; P4HA1; COL3A1; CRTAP
C2	Pentose phosphate pathway	0.0054377	NUP210; NUP37; NUP205
C2	Glucose metabolism	0.00576381	PPP2R5D; NUP205; NUP210; NUP37; FBP2
C3	IL-7 signaling	3.59e-07	RPS6KA1; RPS6KA2; RPS6KA3; PRKAB2; GRK2; PIK3CB; CAMK2G; FYN; CAMK2A; CAMK2B; LCK; PRKACA; CDK5; CDK9; PAK1; PRKAR1A
C3	VEGF	4.47e-07	RPS6KA1; RPS6KA2; RPS6KA3; PRKAB2; GRK2; PIK3CB; CAMK2G; FYN; CAMK2A; CAMK2B; LCK; PRKACA; CDK5; CDK9; PAK1; PRKAR1A
C3	Lysosome - Homo sapiens (human)	0.0026998	SLC11A2; HEXA; ATP6AP1; AP3M1; TCIRG1; GGA3; LAMP1; CLTCL1
C3	Phenylalanine metabolism - Homo sapiens (human)	0.00356965	MAOB; MAOA; AOC2
C3	Tyrosine metabolism - Homo sapiens (human)	0.0043203	MAOB; MAOA; AOC2; ADH1A
C3	Thyroid hormone signaling pathway - Homo sapiens (human)	0.00744737	NCOA1; PIK3CB; RCAN2; ATP1B1; ATP1A4; PRKACA; PFKL
C4	fatty acid &alpha;-oxidation	1.4e-05	ALDH3A2; ACSL1; SLC27A2
C4	Signaling by Receptor Tyrosine Kinases	0.000247929	COL4A2; WASF1; CRKL; HNRNPA1; RAP1B; PTPRJ; STAT5B; CDC42; POLR2A; PXN; POLR2B; STAM; RASA1; YES1; FES
C4	VEGFA-VEGFR2 Signaling Pathway	0.000400559	EPHB2; HDAC1; WASF1; CAPZB; PDIA6; RAP1B; MYO6; LMAN1; PXN; NFKB1; RPL10A; STAM; PTPRJ; CDC42
C4	fatty acid activation	0.00340542	ACSL1; SLC27A2
C4	Estrogen-dependent gene expression	0.0055137	HDAC1; PRMT1; POLR2A; POLR2B; AGO1; AGO3
C4	Adherens junction - Homo sapiens (human)	0.00851332	WASF1; PTPRJ; YES1; CDC42
C5	Neutrophil degranulation	2.73e-05	SELL; VAT1; APRT; MGAM; PSMD6; ALDH3B1; ARPC5; IMPDH1; STOM; ITGAL; PSMD3; TMEM179B; FUCA1; HLA-A
C5	beta-Alanine metabolism - Homo sapiens (human)	8.57e-05	ALDH3B2; ALDH3B1; ALDH6A1; ALDH7A1
C5	Histidine metabolism - Homo sapiens (human)	0.000659287	ALDH3B2; ALDH3B1; ALDH7A1
C5	Innate Immune System	0.00158279	SELL; NFATC1; VAT1; CASP2; APRT; MGAM; PSMD6; ALDH3B1; ARPC5; IMPDH1; STOM; ITGAL; PSMD3; PRKACB; ITPR3; TMEM179B; FUCA1; HLA-A
C5	Purine Metabolism	0.00305299	APRT; NUDT5; IMPDH1
C5	Immune System	0.00365467	NFATC1; HLA-A; PSMD6; PSMD3; STOM; DNM1; DNM3; LILRB5; MGAM; IMPDH1; AP2M1; JAK1; ALDH3B1; ARPC5; APRT; ITPR3; UBE2V2; SELL; VAT1; CASP2; CASP3; ITGAL; PRKACB; TMEM179B; FUCA1
C6	Apoptosis	0.000594964	CYCS; H1-5; H1-2; H1-3; H1-1; CDH1; DNM1L
C6	Spliceosome - Homo sapiens (human)	0.00164029	SNRPD1; RBMX; DHX38; USP39; RBMXL2; PPIE; PRPF6
C6	Galactose metabolism - Homo sapiens (human)	0.00506087	HK3; AKR1B10; GALM
C6	RNA transport - Homo sapiens (human)	0.00523156	SMN1; CLNS1A; PABPC1; EIF3G; TPR; EIF5B; EIF4B
C6	Glycolysis / Gluconeogenesis - Homo sapiens (human)	0.00695257	HK3; ALDH3A1; PGK2; GALM
C6	Translation	0.00821613	EIF3K; PABPC1; MRPS18A; EIF3G; DARS1; DAP3; RPL22; EIF5B; EIF4B

## Sheet: Table S4D
Table S4D : List of candidate proteins (Kruskal-Wallis test p-value <0.05, ratio >2 or <0.5) in DCIS, DCIS-MI, IDC, MBC and HC serum samples
Stages	p-value
HMGB2	2.91e-19
CLIC6	6.79e-19
PIKFYVE	4.26e-20
SRRT	7.45e-21
MTFR1L	9.52e-34
NUP210	1.04e-20
OPLAH	1.56e-15
ABCB1	3.46e-21
CNOT9	6.07e-24
LRRC40	1.54e-14
IDH3B	1.89e-17
CBFB	0.0400356
TCIRG1	9.67e-20
LSM4	5.39e-14
FKBP10	6.87e-11
EIF4H	1.81e-15
TRIM3	2.18e-21
IDH2	6.39e-28
CDK5	3.92e-18
YBX2	8.96e-29
NDUFB4	3.45e-15
CHD5	1.15e-26
ATP2A3	2.14e-28
SEC24B	1.82e-30
TRNT1	1.16e-28
NOP14	9.32e-33
DNM1	8.29e-25
NANS	6.14e-24
EIF2S1	1.42e-22
PSMD6	2.15e-22
