# Supplementary material for: Proteome profiling of serum reveals PSMD6 as a biomarker in breast cancer metastasis
Source: Research Square preprint supplement (doi:10.21203/rs.3.rs-3634466/v1), 2023-12-11
Supplement: Supplementary file 6 [file d4179535849c92ef6e441450.xlsx]

## Sheet: Description
Table S1	Clinicopathologic information and proteome data matrix. Related to Figure 1
Sheet	Description
Table S1A	Demographics and clinical characteristics of participants in discovery and validation cohorts.
Table S1B	Genes identified at protein level in discovery cohort.
Table S1C	Genes identified at protein level in confirmatory cohort.

## Sheet: Table S1A
Table S1A : Demographics and clinical characteristics of participants in discovery and validation cohorts.
Discovery cohort( n = 322)																														Guangzhou1 cohort (n = 113)
Firmiana ID	Stages	Stage_detail	Gender	Age	White blood cell count(WBC)	Red blood cell count(RBC)	Hemoglobin(HGB)	Hematocrit(HCT)	Mean corpuscular volume(MCV)	Mean corpuscular hemoglobin(MCH)	Mean corpuscular hemoglobin concentration(MCHC)	Platelet(PLT)	Neutrophil ratio(NEUT%)	Lymphocyte ratio(LYMPH%)	Monocyte ratio(MONO%)	Eosinophil ratio(EO%)	Basophil ratio(BASO%)	Neutrophil count(NEUT#)	Lymphocyte count(LYMPH#)	Monocyte count(MONO#)	Eosinophil count(EO#)	Basophil count(BASO#)	Conefficient variation of red blood cell volume distribution width(RDW-CV)	Standard deviation in red cell distribution width(RDW-SD)	Platelet distribution width(PDW)	Mean platelet volume(MPV)	Platelet larger cell ratio(P-LCR)	Thrombocytocrit(PCT)		Firmiana ID	Stages	Gender	Age	White blood cell count(WBC)	Red blood cell count(RBC)	Hemoglobin(HGB)	Hematocrit(HCT)	Mean corpuscular volume(MCV)	Mean corpuscular hemoglobin(MCH)	Mean corpuscular hemoglobin concentration(MCHC)	Platelet(PLT)	Neutrophil ratio(NEUT%)	Lymphocyte ratio(LYMPH%)	Monocyte ratio(MONO%)	Eosinophil ratio(EO%)	Basophil ratio(BASO%)	Neutrophil count(NEUT#)	Lymphocyte count(LYMPH#)	Monocyte count(MONO#)
Exp122894	HC	HC	Female		5.67	4.29	132	0.394	91.8	30.8	335	212	0.586	0.303	0.081	0.028	0.002	3.32	1.72	0.46	0.16	0.01	0.13	42.7	11.7	10.6	0.29	2.2		Exp151963	BBT	Female	36	4.75	4.27	119	0.383	89.7	27.9	311	167	0.718	0.232	0.044	0.004	0.002	3.41	1.1	0.21
Exp122901	HC	HC	Female	25	5.34	4.26	131	0.387	90.8	30.8	339	230	0.529	0.388	0.075	0.006	0.002	2.83	2.07	0.4	0.03	0.01	0.12	40.2	15.6	12.3	0.43	2.8		Exp151964	BBT	Female	59	7.07	4.48	131	0.394	87.9	29.2	332	254	0.791	0.164	0.034	0.001	0.01	5.59	1.16	0.24
Exp122903	HC	HC	Female	49	6.6	4.16	127	0.382	91.7	30.6	334	312	0.672	0.264	0.052	0.007	0.005	4.4	1.7	0.3	0	0	0.13	42.4	8.1	0	0	0		Exp151966	BBT	Female	49	8.66	4.82	139	0.422	87.6	28.8	329	329	0.606	0.268	0.08	0.039	0.007	5.25	2.32	0.69
Exp122904	HC	HC	Female	27	4.78	4.1	127	0.381	92.9	31	333	179	0.559	0.324	0.069	0.046	0.002	2.67	1.55	0.33	0.22	0.01	0.12	42.2	12.6	10.6	0.3	1.9		Exp151967	BBT	Female	36	7.33	4.57	126	0.383	83.8	27.6	329	343	0.62	0.278	0.085	0.01	0.007	4.55	2.04	0.62
Exp122906	HC	HC	Female	57	5.8	4.65	102	0.329	70.8	22	311	343	0.655	0.264	0.061	0.012	0.008	3.8	1.5	0.4	0.1	0	0.17	42.9	0	9.1	0	0		Exp151972	BBT	Female	48	5.51	5.03	151	0.451	89.7	30	335	277	0.536	0.325	0.103	0.031	0.005	2.95	1.79	0.57
Exp122907	HC	HC	Female	34	5.14	3.97	126	0.383	96.5	31.7	329	200	0.499	0.401	0.078	0.018	0.004	2.57	2.06	0.4	0.09	0.02	0.12	44.3	12	10.7	0.3	2.1		Exp151977	BBT	Female	29	7.18	4.45	135	0.412	92.6	30.3	328	271	0.63	0.291	0.068	0.01	0.001	4.52	2.09	0.49
Exp122912	HC	HC	Female	55	4.82	5.63	113	0.351	62.3	20.1	322	255	0.473	0.386	0.116	0.023	0.002	2.28	1.86	0.56	0.11	0.01	0.16	34.9	12.5	10.6	0.3	2.7		Exp151981	BBT	Female	43	4.96	4.37	92	0.311	71.2	21.1	296	372	0.429	0.381	0.097	0.079	0.014	2.13	1.89	0.48
Exp122913	HC	HC	Female	32	4.43	4.93	152	0.434	88	30.8	350	134	0.646	0.273	0.07	0.009	0.002	2.86	1.21	0.31	0.04	0.01	0.12	39.6	16.2	12.7	0.47	1.7		Exp151982	BBT	Female	65	5.09	4.29	128	0.405	94.4	29.8	316	256	0.428	0.485	0.077	0.006	0.004	2.18	2.47	0.39
Exp122914	HC	HC	Female	40	5.59	4.17	128	0.388	93	30.7	330	341	0.515	0.361	0.079	0.038	0.007	2.88	2.02	0.44	0.21	0.04	0.15	49.4	12.1	10.9	0.31	3.7		Exp151987	BBT	Female	39	4.7	4.33	132	0.409	94.5	30.5	323	248	0.534	0.36	0.079	0.015	0.012	2.5	1.7	0.4
Exp122916	HC	HC	Female	31	4	4.83	150	0.46	95.2	31.1	326	307	0.559	0.345	0.083	0.008	0.005	2.24	1.38	0.33	0.03	0.02	0.13	45.4	12.5	10.7	0.32	3.3		Exp151989	BBT	Female	73	5.13	4.06	124	0.374	92.1	30.5	332	224	0.516	0.413	0.057	0.01	0.004	2.65	2.12	0.29
Exp122917	HC	HC	Female	40	6.1	4.84	136	0.413	85.4	28	328	177	0.637	0.275	0.062	0.019	0.007	3.9	1.7	0.4	0.1	0	0.14	42	0	9.2	0	0		Exp151992	BBT	Female	45	3.29	3.77	112	0.326	86.5	29.7	344	254	0.471	0.371	0.122	0.03	0.006	1.55	1.22	0.4
Exp122919	HC	HC	Female																											Exp151994	BBT	Female	50	8.37	5.06	147	0.445	87.9	29.1	330	231	0.646	0.221	0.102	0.023	0.008	5.41	1.85	0.85
Exp122921	HC	HC	Female	53	4.93	4.31	124	0.375	87	28.8	331	214	0.462	0.434	0.051	0.045	0.008	2.28	2.14	0.25	0.22	0.04	0.14	43.1	13.1	11.2	0.35	2.4		Exp152003	BBT	Female	55	5.33	4.5	130	0.403	89.6	28.9	323	166	0.542	0.33	0.105	0.019	0.004	2.89	1.76	0.56
Exp122923	HC	HC	Female	36	4.6	4.55	137	0.407	89.5	30.1	337	316	0.494	0.43	0.067	0.009	0	2.27	1.98	0.31	0.04	0	0.13	40.5	12.2	10.6	0.3	3.4		Exp152004	BBT	Female	33	6.3	4.39	128	0.389	88.6	29.2	329	362	0.586	0.349	0.038	0.022	0.005	3.69	2.2	0.24
Exp122925	HC	HC	Female	30	4.95	4.19	131	0.392	93.6	31.3	334	266	0.549	0.354	0.079	0.014	0.004	2.72	1.75	0.39	0.07	0.02	0.12	40.6	11.2	10.2	0.26	2.7		Exp152007	BBT	Female	45	8.94	4.48	135	0.407	90.8	30.1	332	299	0.727	0.204	0.055	0.007	0.007	6.51	1.82	0.49
Exp122927	HC	HC	Female	38	5.43	4.68	100	0.333	71.2	21.4	300	348	0.524	0.378	0.085	0.009	0.004	2.85	2.05	0.46	0.05	0.02	0.16	42.8	13	10.8	0.31	3.8		Exp152008	BBT	Female	34	4.89	4.23	104	0.338	79.9	24.6	308	347	0.619	0.254	0.082	0.035	0.01	3.03	1.24	0.4
Exp122928	HC	HC	Female	34	8.12	4.68	133	0.406	86.8	28.4	328	287	0.67	0.228	0.089	0.012	0.001	5.44	1.85	0.72	0.1	0.01	0.13	39.8	13.2	10.6	0.3	3.1		Exp152016	BBT	Female	27	5.99	4.76	139	0.425	89.3	29.2	327	293	0.54	0.367	0.083	0.007	0.003	3.23	2.2	0.5
Exp122929	HC	HC	Female	34	7.48	4.18	130	0.388	92.8	31.1	335	346	0.58	0.328	0.066	0.021	0.005	4.34	2.45	0.49	0.16	0.04	0.13	44.6	12.4	10.8	0.32	3.7		Exp152017	BBT	Female	30	6.38	4.49	138	0.421	93.8	30.7	328	267	0.57	0.359	0.06	0.002	0.009	3.64	2.29	0.38
Exp122930	HC	HC	Female	31	6.59	4.32	128	0.38	88	29.6	337	333	0.439	0.42	0.082	0.056	0.003	2.89	2.77	0.54	0.37	0.02	0.12	38.2	8.6	8.9	0.16	3		Exp152022	BBT	Female	50	7.9	4.53	136	0.408	90	29.9	332	261	0.61	0.294	0.077	0.01	0.009	4.8	2.3	0.6
Exp122933	HC	HC	Female	37	5.2	4.55	133	0.418	91.9	29.2	318	260	0.571	0.306	0.094	0.017	0.012	2.97	1.59	0.49	0.09	0.06	0.12	41.5	10.3	10	0.23	2.6		Exp152023	BBT	Female	26	8.44	4.95	143	0.432	87.3	28.9	331	178	0.656	0.246	0.06	0.033	0.005	5.53	2.08	0.51
Exp122936	HC	HC	Female		7.5	4.91	138	0.435	88.6	28.1	317	351	0.573	0.349	0.056	0.021	0.001	4.29	2.62	0.42	0.16	0.01	0.13	42.4	14.6	11.7	0.39	4.1		Exp152025	BBT	Female	41	6.82	4.74	138	0.423	89.2	29.1	326	213	0.556	0.361	0.062	0.015	0.006	3.8	2.46	0.42
Exp122939	HC	HC	Female		9.97	4.49	139	0.423	94.2	31	329	269	0.621	0.308	0.051	0.017	0.003	6.19	3.07	0.51	0.17	0.03	0.13	44	16.5	12.7	0.48	3.4		Exp152026	BBT	Female	40	6.54	3.96	126	0.374	94.4	31.8	337	257	0.638	0.278	0.078	0.003	0.003	4.17	1.82	0.51
Exp122940	HC	HC	Female	27	4.43	4.27	132	0.411	96.3	30.9	321	234	0.517	0.379	0.081	0.016	0.007	2.29	1.68	0.36	0.07	0.03	0.13	43.8	12.2	10.3	0.28	2.4		Exp152027	BBT	Female	34	6.81	6.14	113	0.363	59.1	18.4	311	300	0.623	0.275	0.073	0.019	0.01	4.24	1.87	0.5
Exp122941	HC	HC	Female	24	6.98	5.2	148	0.464	89.2	28.5	319	354	0.606	0.309	0.076	0.006	0.003	4.23	2.16	0.53	0.04	0.02	0.13	42.6	11.9	10.1	0.26	3.6		Exp152028	BBT	Female	51	6.35	4.22	131	0.375	88.9	31	349	192	0.576	0.337	0.069	0.016	0.002	3.66	2.14	0.44
Exp122946	HC	HC	Female	33	4.34	4.45	133	0.405	91	29.9	328	213	0.516	0.376	0.076	0.03	0.002	2.24	1.63	0.33	0.13	0.01	0.12	40.6	11.5	10.4	0.28	2.2		Exp152034	BBT	Female	23	8.37	4.39	127	0.385	87.7	28.9	330	293	0.686	0.219	0.09	0.004	0.001	5.75	1.83	0.75
Exp122948	HC	HC	Female	26	8.75	4.63	144	0.434	93.7	31.1	332	281	0.62	0.294	0.067	0.016	0.003	5.42	2.57	0.59	0.14	0.03	0.12	40.5	11.9	10.1	0.26	2.8		Exp152038	BBT	Female	33	4.77	3.71	113	0.346	93.3	30.5	327	168	0.596	0.289	0.073	0.034	0.008	2.84	1.38	0.35
Exp122952	HC	HC	Female		4.73	4.85	125	0.398	82.1	25.8	314	330	0.453	0.433	0.072	0.027	0.015	2.14	2.05	0.34	0.13	0.07	0.17	50.2	15	12.2	0.42	4		Exp152039	BBT	Female	38	9.74	4.4	128	0.396	90	29.1	323	322	0.622	0.268	0.076	0.032	0.002	6.06	2.61	0.74
Exp122953	HC	HC	Female	45	5.59	4.13	126	0.372	90.1	30.5	339	202	0.566	0.324	0.052	0.054	0.004	3.17	1.81	0.29	0.3	0.02	0.12	39.8	10.6	10.2	0.25	2.1		Exp152048	BBT	Female	51	5.26	4.12	130	0.37	89.8	31.6	351	212	0.586	0.319	0.078	0.015	0.002	3.08	1.68	0.41
Exp122954	HC	HC	Female	27	10.9	4.41	136	0.403	91.6	30.9	337	270	0.723	0.168	0.084	0.022	0.003	7.9	1.8	0.9	0.2	0	0.13	42	0	8.8	0	0		Exp152013	BBT	Female	41	6.82	4.74	138	0.423	89.2	29.1	326	213	0.556	0.361	0.062	0.015	0.006	3.8	2.46	0.42
Exp122955	HC	HC	Female	50	7.44	4.53	139	0.412	90.9	30.7	337	335	0.544	0.347	0.079	0.027	0.003	4.05	2.58	0.59	0.2	0.02	0.13	41.3	11.7	10	0.25	3.3		Exp151965	BC	Female	49	8.9	4.83	133	0.402	83.2	27.5	331	277	0.809	0.135	0.049	0.004	0.003	7.19	1.2	0.44
Exp122956	HC	HC	Female	26	3.84	3.91	124	0.375	95.9	31.7	331	250	0.505	0.37	0.091	0.029	0.005	1.94	1.42	0.35	0.11	0.02	0.13	44.7	10.3	9.6	0.21	2.4		Exp151968	BC	Female	44	8.12	4.15	126	0.37	89.2	30.4	341	191	0.707	0.181	0.069	0.041	0.002	5.74	1.47	0.56
Exp122959	HC	HC	Female	28	7.68	5.06	144	0.428	84.6	28.5	336	214	0.527	0.384	0.068	0.018	0.003	4.05	2.95	0.52	0.14	0.02	0.12	37.7	19	13.6	0.54	2.9		Exp151969	BC	Female	59	6.08	3.96	125	0.375	94.7	31.6	333	234	0.538	0.316	0.076	0.063	0.007	3.28	1.92	0.46
Exp122963	HC	HC	Female	25	8.86	4.73	129	0.41	86.7	27.3	315	448	0.516	0.314	0.137	0.027	0.006	4.58	2.78	1.21	0.24	0.05	0.14	43.5	11.2	9.5	0.21	4.2		Exp151970	BC	Female	45	5.55	4.3	121	0.377	87.7	28.1	321	293	0.717	0.15	0.095	0.029	0.009	3.98	0.83	0.53
Exp122966	HC	HC	Female	31	7.21	4.2	131	0.394	93.8	31.2	332	312	0.688	0.215	0.076	0.018	0.003	4.96	1.55	0.55	0.13	0.02	0.13	43.6	11.2	10.1	0.25	3.1		Exp151971	BC	Female	54	6.32	4.3	132	0.394	91.6	30.7	335	251	0.703	0.215	0.062	0.011	0.009	4.44	1.36	0.39
Exp122968	HC	HC	Female	26	8.39	4.69	144	0.423	90.2	30.7	340	353	0.652	0.274	0.063	0.01	0.001	5.47	2.3	0.53	0.08	0.01	0.14	45.1	16	12.3	0.44	4.3		Exp151973	BC	Female	44	6.28	4.23	106	0.348	82.3	25.1	305	353	0.526	0.36	0.1	0.006	0.008	3.3	2.26	0.63
Exp122969	HC	HC	Female	37	4.51	4.71	92	0.317	67.3	19.5	290	419	0.579	0.297	0.095	0.027	0.002	2.61	1.34	0.43	0.12	0.01	0.21	49.1	9.6	8.9	0.17	3.7		Exp151974	BC	Female	43	9.74	5.24	114	0.378	72.1	21.8	302	348	0.754	0.183	0.057	0.003	0.003	7.34	1.78	0.56
Exp122970	HC	HC	Female		5.85	4.76	135	0.406	85.3	28.4	333	214	0.599	0.315	0.074	0.01	0.002	3.51	1.84	0.43	0.06	0.01	0.13	40.4	13.7	11	0.33	2.3		Exp151975	BC	Female	54	6.8	4.5	133	0.413	91.9	29.5	321	345	0.495	0.36	0.087	0.052	0.006	3.4	2.4	0.6
Exp122972	HC	HC	Female		7.38	4.47	140	0.417	93.3	31.3	336	262	0.652	0.282	0.058	0.007	0.001	4.81	2.08	0.43	0.05	0.01	0.12	40.2	16.3	12.5	0.46	3.3		Exp151976	BC	Female	70	6.35	3.8	123	0.377	99.2	32.4	326	187	0.618	0.298	0.066	0.016	0.002	3.93	1.89	0.42
Exp122973	HC	HC	Female	30	4.84	4.21	134	0.39	92.6	31.8	344	278	0.56	0.347	0.074	0.017	0.002	2.71	1.68	0.36	0.08	0.01	0.12	41.8	10.2	9.7	0.22	2.7		Exp151978	BC	Female	48	4.48	4.49	88	0.317	70.6	19.6	278	334	0.602	0.31	0.071	0.013	0.004	2.69	1.39	0.32
Exp122976	HC	HC	Female	34	5.72	4.81	135	0.41	85.2	28.1	329	209	0.464	0.409	0.059	0.063	0.005	2.65	2.34	0.34	0.36	0.03	0.12	37.8	11.7	10.7	0.29	2.2		Exp151979	BC	Female	46	7.25	4.07	127	0.367	90.2	31.2	346	323	0.773	0.19	0.03	0.006	0.001	5.6	1.38	0.22
Exp122977	HC	HC	Female		6.58	4.55	133	0.401	88.1	29.2	332	241	0.624	0.278	0.065	0.027	0.006	4.1	1.83	0.43	0.18	0.04	0.12	39.5	12.6	11.2	0.34	2.7		Exp151980	BC	Female	33	5.48	4.24	125	0.377	88.9	29.5	332	316	0.546	0.389	0.049	0.011	0.005	2.99	2.13	0.27
Exp122979	HC	HC	Female		7.2	4.76	114	0.367	77.1	23.9	311	307	0.574	0.294	0.065	0.063	0.004	4.13	2.12	0.47	0.45	0.03	0.16	43.7	11.6	10.7	0.29	3.3		Exp151983	BC	Female	63	8.08	4.51	132	0.403	89.4	29.3	328	282	0.77	0.166	0.053	0.006	0.005	6.22	1.34	0.43
Exp122981	HC	HC	Female		5.86	4.76	139	0.416	87.4	29.2	334	295	0.565	0.358	0.063	0.012	0.002	3.31	2.1	0.37	0.07	0.01	0.12	37.3	10.1	9.4	0.2	2.8		Exp151984	BC	Female	56	6.52	4.64	138	0.427	92	29.7	323	229	0.62	0.268	0.058	0.048	0.006	4.04	1.75	0.38
Exp122983	HC	HC	Female	28	6.5	4.23	131	0.394	93.1	31	332	181	0.527	0.406	0.051	0.014	0.002	3.43	2.64	0.33	0.09	0.01	0.12	41.6	13.7	11.1	0.34	2		Exp151985	BC	Female	53	4.6	5.26	94	0.328	62.4	17.9	287	214	0.601	0.339	0.052	0.004	0.004	2.76	1.56	0.24
Exp122988	HC	HC	Female		6	4.33	126	0.378	87.3	29.1	333	309	0.553	0.322	0.102	0.018	0.005	3.32	1.93	0.61	0.11	0.03	0.14	43.3	9.6	9.1	0.17	2.8		Exp151986	BC	Female	46	6.75	4.91	139	0.423	86.2	28.3	329	340	0.699	0.215	0.081	0.001	0.004	4.71	1.45	0.55
Exp122989	HC	HC	Female	29	6.19	4.75	127	0.399	84	26.7	318	346	0.54	0.391	0.045	0.019	0.005	3.34	2.42	0.28	0.12	0.03	0.15	44.9	9.7	9.4	0.2	3.2		Exp151988	BC	Female	40	5.68	4.43	134	0.393	88.7	30.2	341	246	0.716	0.241	0.035	0.004	0.004	4.07	1.37	0.2
Exp122990	HC	HC	Female	24	5.5	3.92	131	0.378	96.4	33.4	347	285	0.581	0.345	0.058	0.011	0.005	3.19	1.9	0.32	0.06	0.03	0.11	40.3	12.1	10.4	0.28	3		Exp151990	BC	Female	25	7.18	5.89	124	0.42	71.3	21.1	295	332	0.677	0.263	0.043	0.013	0.004	4.86	1.89	0.31
Exp122993	HC	HC	Female		7.72	5.89	120	0.379	64.3	20.4	317	188	0.652	0.247	0.083	0.014	0.004	5.03	1.91	0.64	0.11	0.03	0.16	34.6	0	0	0	0		Exp151991	BC	Female	41	5.2	4.71	141	0.438	93	29.9	322	201	0.63	0.275	0.075	0.012	0.008	3.28	1.43	0.39
Exp122994	HC	HC	Female		4.92	4.3	134	0.404	94	31.2	332	292	0.633	0.278	0.061	0.026	0.002	3.11	1.37	0.3	0.13	0.01	0.13	44.7	10.6	9.7	0.22	2.8		Exp151993	BC	Female	44	8.15	4.11	118	0.359	87.3	28.7	329	327	0.736	0.187	0.067	0.006	0.004	6	1.52	0.55
Exp122995	HC	HC	Female		5.68	4.5	142	0.42	93.3	31.6	338	240	0.556	0.342	0.046	0.049	0.007	3.16	1.94	0.26	0.28	0.04	0.13	44.4	11.3	10	0.25	2.4		Exp151995	BC	Female	45	5.37	4.04	91	0.306	75.7	22.5	297	267	0.614	0.311	0.065	0.006	0.004	3.3	1.67	0.35
Exp122998	HC	HC	Female	28	6.42	4.89	133	0.411	84	27.2	324	250	0.563	0.322	0.065	0.047	0.003	3.61	2.07	0.42	0.3	0.02	0.17	49.8	14	11.4	0.37	2.9		Exp151996	BC	Female	55	9.45	2.8	68	0.226	80.7	24.3	301	522	0.773	0.14	0.076	0.006	0.005	7.3	1.32	0.72
Exp123003	HC	HC	Female		6.45	4.62	156	0.448	97	33.8	348	193	0.656	0.267	0.062	0.009	0.006	4.23	1.72	0.4	0.06	0.04	0.13	45.1	15	11.5	0.38	2.2		Exp151997	BC	Female	28	6.84	4.52	135	0.412	91.2	29.9	328	282	0.555	0.323	0.06	0.056	0.006	3.8	2.21	0.41
Exp123005	HC	HC	Female	38	5.29	4.25	130	0.386	90.8	30.6	337	199	0.523	0.361	0.072	0.04	0.004	2.77	1.91	0.38	0.21	0.02	0.13	40.3	12.2	10.5	0.29	2.1		Exp151998	BC	Female	57	4.13	4.03	124	0.384	95.3	30.8	323	201	0.592	0.252	0.08	0.061	0.015	2.45	1.04	0.33
Exp123007	HC	HC	Female		7.5	4.35	138	0.405	93.1	31.7	341	214	0.655	0.252	0.064	0.021	0.008	4.91	1.89	0.48	0.16	0.06	0.12	41.2	14.5	11.9	0.4	2.6		Exp151999	BC	Female	44	3.04	4.38	137	0.409	93.4	31.3	335	217	0.586	0.329	0.082	0.003	0	1.78	1	0.25
Exp123008	HC	HC	Female		7.24	4.55	139	0.415	91.2	30.5	335	277	0.604	0.297	0.075	0.021	0.003	4.38	2.15	0.54	0.15	0.02	0.12	39.6	12.3	11	0.32	3		Exp152000	BC	Female	41	7	3.37	99	0.318	94.4	29.4	311	221	0.752	0.186	0.059	0	0.003	5.27	1.3	0.41
Exp123115	HC	HC	Female	42	4.69	4.29	132	0.391	91.1	30.8	338	225	0.469	0.439	0.083	0.009	0	2.2	2.06	0.39	0.04	0	0.13	42.1	12.9	10.9	0.32	2.4		Exp152001	BC	Female	51	6.25	4.32	125	0.39	90.3	28.9	321	232	0.685	0.254	0.053	0.002	0.006	4.28	1.59	0.33
Exp123012	BC	DCIS	Female	55	5.76	3.93	125	0.372	94.7	31.8	336	283	0.469	0.425	0.092	0.012	0.002	2.7	2.45	0.53	0.07	0.01	0.12	41.5	10	9.4	0.2	2.7		Exp152002	BC	Female	53	6.22	4.37	131	0.4	91.5	30	328	290	0.625	0.305	0.059	0.005	0.006	3.88	1.9	0.37
Exp123014	BC	DCIS	Female	75	6.42	4.3	136	0.405	94.2	31.6	336	214	0.65	0.263	0.07	0.014	0.003	4.17	1.69	0.45	0.09	0.02	0.12	42.5	12.5	10.8	0.32	2.3		Exp152005	BC	Female	54	5.97	4.36	137	0.423	97	31.4	324	238	0.817	0.09	0.082	0.008	0.003	4.87	0.54	0.49
Exp123017	BC	DCIS	Female	43	10.45	4.46	136	0.422	94.6	30.5	322	358	0.67	0.236	0.076	0.013	0.005	7	2.47	0.79	0.14	0.05	0.13	43.4	9.8	9.3	0.19	3.3		Exp152006	BC	Female	40	5.16	3.79	113	0.342	90.2	29.8	330	219	0.619	0.289	0.078	0.01	0.004	3.2	1.49	0.4
Exp123032	BC	DCIS	Female	46	4.91	3.93	96	0.311	79.1	24.4	309	317	0.473	0.403	0.092	0.024	0.008	2.32	1.98	0.45	0.12	0.04	0.17	48	9.6	10.1	0.23	3.2		Exp152009	BC	Female	45	5.81	4.76	124	0.391	82.1	26.1	317	339	0.677	0.222	0.079	0.019	0.003	3.93	1.29	0.46
Exp123056	BC	DCIS	Female	50	7.49	4.32	128	0.38	88	29.6	337	257	0.64	0.278	0.075	0.003	0.004	4.8	2.08	0.56	0.02	0.03	0.13	41.2	10.7	10.2	0.25	2.6		Exp152010	BC	Female	44	10.54	4.6	133	0.405	88	28.9	328	401	0.682	0.248	0.059	0.009	0.002	7.2	2.61	0.62
Exp123073	BC	DCIS	Female	50	6.51	4.42	141	0.405	91.6	31.9	348	186	0.611	0.207	0.131	0.048	0.003	3.98	1.35	0.85	0.31	0.02	0.12	40.5	9.9	9.8	0.23	1.8		Exp152011	BC	Female	58	6.39	3.9	114	0.35	89.7	29.2	326	256	0.559	0.34	0.086	0.013	0.002	3.58	2.17	0.55
Exp123074	BC	DCIS	Female	47	6.97	4.72	98	0.334	70.8	20.8	293	352	0.696	0.235	0.067	0.001	0.001	4.84	1.64	0.47	0.01	0.01	0.19	46.1	12	10.5	0.29	3.7		Exp152012	BC	Female	49	7.86	4.58	145	0.42	91.7	31.7	345	278	0.524	0.424	0.043	0.005	0.004	4.12	3.33	0.34
Exp123081	BC	DCIS	Female	48	4.58	5.16	140	0.43	83.3	27.1	326	274	0.593	0.336	0.055	0.009	0.007	2.72	1.54	0.25	0.04	0.03	0.13	38.5	12.7	10.4	0.29	2.8		Exp152014	BC	Female	65	4.65	3.78	123	0.374	98.9	32.5	329	267	0.572	0.308	0.075	0.043	0.002	2.66	1.43	0.35
Exp123106	BC	DCIS	Female	85	10.41	3.97	123	0.356	89.7	31	346	420	0.721	0.205	0.056	0.014	0.004	7.51	2.13	0.58	0.15	0.04	0.13	43.8	9.4	9	0.16	3.8		Exp152015	BC	Female	53	7.66	4.72	140	0.445	94.3	29.7	315	224	0.794	0.15	0.054	0.001	0.001	6.08	1.15	0.41
Exp123121	BC	DCIS	Female	77	5.51	4.47	134	0.408	91.3	30	328	243	0.596	0.243	0.085	0.069	0.007	3.28	1.34	0.47	0.38	0.04	0.13	42.5	9.8	9.4	0.2	2.3		Exp152018	BC	Female	63	8.4	4.42	134	0.396	89.6	30.3	338	415	0.673	0.252	0.065	0.005	0.005	5.65	2.12	0.55
Exp123174	BC	DCIS	Female	42	8.13	3.63	114	0.342	94.2	31.4	333	280	0.533	0.344	0.069	0.049	0.005	4.33	2.8	0.56	0.4	0.04	0.13	45.1	10.1	9.5	0.2	2.6		Exp152020	BC	Female	85	9.53	3.42	84	0.268	78.4	24.6	313	400	0.724	0.162	0.097	0.013	0.004	6.91	1.54	0.92
Exp123179	BC	DCIS	Female	51	4.99	4.11	119	0.364	88.6	29	327	257	0.718	0.198	0.07	0.01	0.004	3.58	0.99	0.35	0.05	0.02	0.12	38.5	12.9	10.7	0.32	2.8		Exp152021	BC	Female	52	9.02	6.57	128	0.432	65.8	19.5	296	289	0.691	0.236	0.054	0.013	0.006	6.23	2.13	0.49
Exp123187	BC	DCIS	Female	38	6.88	4.13	99	0.339	82.1	24	292	488	0.663	0.267	0.063	0.003	0.004	4.56	1.84	0.43	0.02	0.03	0.26	75.9	10.3	9.3	0.2	4.5		Exp152024	BC	Female	52	2.74	3.46	129	0.367	106.1	37.3	351	197	0.679	0.215	0.095	0.007	0.004	1.86	0.59	0.26
Exp123215	BC	DCIS	Female	39	7.13	4.54	138	0.413	91	30.4	334	238	0.537	0.356	0.084	0.017	0.006	3.83	2.54	0.6	0.12	0.04	0.13	43.1	13	10.6	0.29	2.5		Exp152029	BC	Female	68	5.13	4.19	127	0.386	92.1	30.3	329	281	0.602	0.259	0.133	0	0.006	3.09	1.33	0.68
Exp123216	BC	DCIS	Female	51	6.04	3.55	117	0.337	94.9	33	347	212	0.525	0.386	0.065	0.017	0.007	3.18	2.33	0.39	0.1	0.04	0.12	40.1	10.2	9.6	0.21	2		Exp152030	BC	Female	52	6.52	3.95	103	0.33	83.5	26.1	312	310	0.65	0.259	0.081	0.005	0.005	4.24	1.69	0.53
Exp123223	BC	DCIS	Female	45	5.47	4.36	104	0.344	78.9	23.9	302	206	0.684	0.239	0.062	0.011	0.004	3.74	1.31	0.34	0.06	0.02	0.16	45	13.9	11.6	0.38	2.4		Exp152031	BC	Female	57	6.92	5.23	146	0.456	87.2	27.9	320	198	0.573	0.344	0.059	0.02	0.004	3.96	2.38	0.41
Exp123227	BC	DCIS	Female	49																										Exp152032	BC	Female	55	6.59	5.2	147	0.441	84.8	28.3	333	209	0.635	0.285	0.053	0.021	0.006	4.18	1.88	0.35
Exp123237	BC	DCIS	Female	73	3.88	3.62	111	0.343	94.8	30.7	324	181	0.559	0.356	0.072	0.01	0.003	2.17	1.38	0.28	0.04	0.01	0.13	46.8	10.4	10.2	0.25	1.9		Exp152033	BC	Female	60	6.43	4.06	123	0.368	90.6	30.3	334	230	0.588	0.347	0.056	0.006	0.003	3.78	2.23	0.36
Exp123248	BC	DCIS	Female	49	8.48	4.04	117	0.372	92.1	29	315	608	0.642	0.3	0.044	0.007	0.007	5.45	2.54	0.37	0.06	0.06	0.13	41.4	10.5	9.5	0.21	5.8		Exp152035	BC	Female	58	6.48	5.44	148	0.457	84	27.2	324	332	0.656	0.233	0.086	0.017	0.008	4.25	1.51	0.56
Exp123251	BC	DCIS	Female	61	6.2	3.98	127	0.389	97.7	31.9	326	180	0.466	0.437	0.079	0.016	0.002	2.89	2.71	0.49	0.1	0.01	0.13	47.6	15.6	12	0.4	2.2		Exp152036	BC	Female	63	7.62	4.44	129	0.397	89.4	29.1	325	293	0.539	0.375	0.062	0.016	0.008	4.11	2.86	0.47
Exp123255	BC	DCIS	Female	48	4.98	4.15	112	0.365	88	27	307	253	0.663	0.213	0.11	0.004	0.01	3.3	1.06	0.55	0.02	0.05	0.18	58.4	9.4	9.1	0.18	2.3		Exp152037	BC	Female	42	5.83	4.2	126	0.376	89.5	30	335	243	0.617	0.304	0.06	0.014	0.005	3.6	1.77	0.35
Exp123260	BC	DCIS	Female	65	5.45	4.85	140	0.412	84.9	28.9	340	251	0.655	0.25	0.073	0.018	0.004	3.57	1.36	0.4	0.1	0.02	0.13	40.8	11.6	10.3	0.27	2.6		Exp152040	BC	Female	57	5.66	4.26	131	0.39	91.5	30.8	336	294	0.733	0.205	0.051	0.004	0.007	4.15	1.16	0.29
Exp123261	BC	DCIS	Female	32	8.18	4.58	131	0.403	88	28.6	325	267	0.77	0.164	0.051	0.013	0.002	6.29	1.34	0.42	0.11	0.02	0.13	41.8	11.5	10.1	0.25	2.7		Exp152041	BC	Female	46	6.38	4	125	0.368	92	31.3	340	201	0.735	0.196	0.055	0.011	0.003	4.69	1.25	0.35
Exp123263	BC	DCIS	Female	84	7.35	3.94	121	0.37	93.9	30.7	327	203	0.662	0.241	0.072	0.02	0.005	4.86	1.77	0.53	0.15	0.04	0.13	44.9	11.9	10.4	0.27	2.1		Exp152042	BC	Female	45	9.24	4.02	121	0.368	91.5	30.1	329	332	0.699	0.193	0.088	0.016	0.004	6.46	1.78	0.81
Exp123267	BC	DCIS	Female	56	5.14	4.62	137	0.412	89.2	29.7	333	182	0.498	0.391	0.078	0.031	0.002	2.56	2.01	0.4	0.16	0.01	0.13	42	17.8	12.6	0.48	2.3		Exp152043	BC	Female	60	5.69	3.45	99	0.304	88.1	28.7	326	137	0.757	0.165	0.076	0	0.002	4.31	0.94	0.43
Exp122944	BC	DCIS-MI	Female	49	6.83	4.54	138	0.433	95.4	30.4	319	248	0.66	0.245	0.083	0.009	0.003	4.51	1.67	0.57	0.06	0.02	0.12	40.9	11.9	10.3	0.28	2.6		Exp152044	BC	Female	42	9.25	4.41	125	0.394	89.3	28.3	317	338	0.481	0.441	0.07	0.005	0.003	4.44	4.08	0.65
Exp123029	BC	DCIS-MI	Female	72	6.09	4.08	123	0.375	91.9	30.1	328	233	0.564	0.346	0.076	0.007	0.007	3.44	2.11	0.46	0.04	0.04	0.12	41.8	12.4	11.1	0.34	2.6		Exp152045	BC	Female	59	7.14	4.71	133	0.404	85.8	28.2	329	216	0.67	0.245	0.076	0.001	0.008	4.78	1.75	0.54
Exp123031	BC	DCIS-MI	Female	33	6.91	4.65	139	0.43	92.5	29.9	323	178	0.689	0.243	0.058	0.007	0.003	4.76	1.68	0.4	0.05	0.02	0.12	41.2	17.8	12.8	0.48	2.3		Exp152046	BC	Female	43	5.64	3.25	106	0.331	101.8	32.6	320	343	0.746	0.119	0.119	0.007	0.009	4.21	0.67	0.67
Exp123077	BC	DCIS-MI	Female	36	4.85	4.74	142	0.433	91.4	30	328	203	0.642	0.272	0.07	0.012	0.004	3.11	1.32	0.34	0.06	0.02	0.12	40	12.3	10.2	0.27	2.1		Exp152047	BC	Female	51	3.73	4.83	121	0.396	82	25.1	306	201	0.544	0.332	0.102	0.011	0.011	2.03	1.24	0.38
Exp123082	BC	DCIS-MI	Female	68	8.75	4.11	123	0.383	93.2	29.9	321	328	0.565	0.317	0.075	0.035	0.008	4.94	2.77	0.66	0.31	0.07	0.13	45.1	13	10.9	0.32	3.6		Exp152049	BC	Female	48	8.04	3.83	103	0.327	85.4	26.9	315	260	0.697	0.21	0.088	0.001	0.004	5.6	1.69	0.71
Exp123096	BC	DCIS-MI	Female	51	8.55	5.24	117	0.379	72.3	22.3	309	225	0.783	0.157	0.056	0.002	0.002	6.69	1.34	0.48	0.02	0.02	0.15	38.7	11.7	10.7	0.3	2.4		Exp152051	HC	Female	50	4.79	4.87	143	0.435	89.3	29.4	329	149	0.514	0.399	0.071	0.01	0.006	2.46	1.91	0.34
Exp123104	BC	DCIS-MI	Female	55	5.78	4.12	125	0.396	96.1	30.3	316	287	0.533	0.327	0.099	0.036	0.005	3.08	1.89	0.57	0.21	0.03	0.13	45.5	10.8	9.8	0.23	2.8		Exp152052	HC	Female	44	6.2	4.63	133	0.403	87.1	28.7	329	232	0.501	0.432	0.049	0.011	0.007	3.1	2.7	0.3
Exp123136	BC	DCIS-MI	Female	70	6	4.52	141	0.43	95.1	31.2	328	244	0.568	0.33	0.088	0.012	0.002	3.41	1.98	0.53	0.07	0.01	0.12	41.7	11.4	10	0.24	2.4		Exp152054	HC	Female	70	5.74	4.8	147	0.456	95	30.6	322	232	0.524	0.382	0.077	0.01	0.007	3.01	2.19	0.44
Exp123143	BC	DCIS-MI	Female	46	3.6	5.05	75	0.297	58.8	14.9	253	310	0.547	0.358	0.078	0.014	0.003	1.97	1.29	0.28	0.05	0.01	0.22	42.3	0	0	0	0		Exp152055	HC	Female	41	6.3	4.54	133	0.407	89.7	29.2	326	241	0.644	0.276	0.04	0.035	0.005	4.1	1.7	0.3
Exp123147	BC	DCIS-MI	Female	48	4.74	3.29	78	0.256	77.8	23.7	305	260	0.416	0.253	0.316	0.011	0.004	1.97	1.2	1.5	0.05	0.02	0.17	47.8	12.9	10.9	0.32	2.8		Exp152056	HC	Female	39	6.51	4.86	129	0.398	81.9	26.5	324	206	0.528	0.39	0.058	0.018	0.006	3.43	2.54	0.38
Exp123198	BC	DCIS-MI	Female	38	6.26	4.41	133	0.392	88.9	30.2	339	211	0.608	0.294	0.064	0.029	0.005	3.81	1.84	0.4	0.18	0.03	0.12	39.7	14.3	11.9	0.39	2.5		Exp152057	HC	Female	41	8	4.33	131	0.397	91.6	30.4	332	322	0.586	0.318	0.058	0.035	0.003	4.7	2.5	0.5
Exp123202	BC	DCIS-MI	Female	54	6.77	4.5	140	0.42	93.3	31.1	333	245	0.405	0.499	0.075	0.015	0.006	2.74	3.38	0.51	0.1	0.04	0.13	42.5	11.4	10.1	0.26	2.5		Exp152058	HC	Female	43	8	3.8	121	0.36	94.8	32	337	206	0.696	0.234	0.056	0.01	0.004	5.6	1.9	0.4
Exp123208	BC	DCIS-MI	Female	66	6.3	4.53	121	0.385	85	26.7	314	298	0.601	0.276	0.106	0.014	0.003	3.78	1.74	0.67	0.09	0.02	0.13	38.4	9.4	9.3	0.18	2.8		Exp152059	HC	Female	38	4.6	4.51	130	0.397	88	28.8	327	200	0.561	0.355	0.063	0.01	0.011	2.6	1.6	0.3
Exp123226	BC	DCIS-MI	Female	60	7.23	4.82	134	0.41	85.1	27.8	327	370	0.579	0.302	0.087	0.026	0.006	4.19	2.18	0.63	0.19	0.04	0.13	41.1	11.4	10.2	0.26	3.8		Exp152060	HC	Female	37	5.1	4.14	131	0.389	93.8	31.6	337	208	0.571	0.324	0.065	0.029	0.011	2.9	1.6	0.3
Exp123247	BC	DCIS-MI	Female	47	5.15	4.11	118	0.362	88.1	28.7	326	250	0.667	0.217	0.085	0.027	0.004	3.43	1.12	0.44	0.14	0.02	0.13	41.8	9.1	8.7	0.15	2.2		Exp152062	HC	Female	26	8.2	4.28	131	0.398	93.1	30.6	329	298	0.728	0.21	0.054	0.004	0.004	6	1.7	0.4
Exp123254	BC	DCIS-MI	Female	50	3.42	4.07	127	0.375	92.1	31.2	339	137	0.514	0.415	0.056	0.012	0.003	1.76	1.42	0.19	0.04	0.01	0.14	46.2	16.3	12.1	0.42	1.7		Exp152064	HC	Female	34	5.35	4.58	142	0.439	95.9	31	323	269	0.538	0.351	0.082	0.022	0.007	2.87	1.88	0.44
Exp123052	BC	IDC	Female	51	9.87	5.31	144	0.448	84.4	27.1	321	268	0.715	0.206	0.063	0.014	0.002	7.06	2.03	0.62	0.14	0.02	0.12	36.4	13.1	11.5	0.37	3.1		Exp152066	HC	Female	59	4.8	4.39	141	0.42	95.7	32	335	235	0.452	0.46	0.064	0.015	0.009	2.2	2.2	0.3
Exp123087	BC	IDC	Female	34	3.53	4.03	124	0.377	93.5	30.8	329	249	0.52	0.399	0.065	0.008	0.008	1.83	1.41	0.23	0.03	0.03	0.13	44.9	15	11.8	0.4	2.9		Exp152067	HC	Female	43	6.2	4.54	137	0.42	92.5	30.2	327	231	0.65	0.271	0.07	0.003	0.006	4	1.7	0.4
Exp123018	BC	IDC	Female	68	5.78	4.19	119	0.373	89	28.4	319	245	0.681	0.26	0.045	0.009	0.005	3.94	1.5	0.26	0.05	0.03	0.13	42.9	9.4	9.3	0.19	2.3		Exp152068	HC	Female	41	6.46	5.02	125	0.392	78.1	24.9	319	478	0.564	0.361	0.053	0.011	0.011	3.65	2.33	0.34
Exp123246	BC	IDC	Female	83	7.41	4.1	123	0.389	94.9	30	316	166	0.752	0.184	0.051	0.005	0.008	5.57	1.36	0.38	0.04	0.06	0.14	49.9	12.5	10.9	0.32	1.8		Exp152070	HC	Female	39	8.1	4.65	129	0.402	86.5	27.7	320	261	0.472	0.393	0.06	0.073	0.002	3.9	3.2	0.5
Exp123209	BC	IDC	Female	32	6.99	4.65	127	0.4	86	27.3	318	232	0.503	0.385	0.064	0.044	0.004	3.51	2.69	0.45	0.31	0.03	0.13	39	13.2	10.9	0.33	2.5		Exp152071	HC	Female	40	7.2	4.31	124	0.383	88.8	28.8	324	298	0.647	0.268	0.074	0.005	0.006	4.7	1.9	0.5
Exp123231	BC	IDC	Female	54	6.6	4.91	140	0.442	90	28.5	317	263	0.612	0.274	0.08	0.026	0.008	4.04	1.81	0.53	0.17	0.05	0.13	41.2	9.7	9.5	0.2	2.5		Exp152072	HC	Female	56	7	4.38	135	0.404	92.1	30.7	333	243	0.668	0.266	0.044	0.014	0.008	4.7	1.9	0.3
Exp123181	BC	IDC	Female	50	7.51	4.24	124	0.38	89.6	29.2	326	283	0.746	0.201	0.048	0.004	0.001	5.6	1.51	0.36	0.03	0.01	0.12	40.5	9.9	9.8	0.23	2.8		Exp152073	HC	Female	43	4.59	4.23	125	0.381	90.1	29.6	328	308	0.532	0.305	0.083	0.076	0.004	2.44	1.4	0.38
Exp123191	BC	IDC	Female	55	5.18	4.95	149	0.457	92.3	30.1	326	228	0.534	0.375	0.06	0.021	0.01	2.77	1.94	0.31	0.11	0.05	0.14	46.3	12.8	11.1	0.33	2.5		Exp152074	HC	Female	49	7.02	4.7	137	0.41	87.2	29.1	334	236	0.453	0.472	0.053	0.019	0.003	3.19	3.31	0.37
Exp123078	BC	IDC	Female	57	5.2	4.53	131	0.399	88.1	28.9	328	275	0.577	0.357	0.056	0.005	0.005	3	1.9	0.3	0	0	0.13	41.1	9.4	0	0	0		Exp152075	HC	Female	40	5.09	5.61	107	0.359	64	19.1	298	300	0.601	0.287	0.077	0.029	0.006	3.06	1.46	0.39
Exp123094	BC	IDC	Female	48	9	4.61	126	0.404	87.6	27.3	312	288	0.793	0.15	0.054	0.002	0.001	7.13	1.35	0.49	0.02	0.01	0.14	43.8	10.9	9.7	0.22	2.8		Exp152076	HC	Female	41	4.94	4.36	137	0.417	95.6	31.4	329	217	0.645	0.298	0.045	0.008	0.004	3.19	1.47	0.22
Exp123015	BC	IDC	Female	62	7.1	4.7	142	0.437	93	30.2	325	267	0.671	0.255	0.061	0.01	0.003	4.77	1.81	0.43	0.07	0.02	0.13	43.5	14.4	11.3	0.36	3		Exp152077	HC	Female	36	5.63	5.89	94	0.329	55.9	16	286	241	0.609	0.295	0.083	0.011	0.002	3.43	1.66	0.47
Exp123117	BC	IDC	Female	51	7.47	4.48	139	0.423	94.4	31	329	315	0.649	0.292	0.05	0.004	0.005	4.85	2.18	0.37	0.03	0.04	0.12	41.1	11.4	10.1	0.26	3.2		Exp152078	HC	Female	44	6.78	3.9	113	0.349	89.5	29	324	301	0.615	0.302	0.072	0.004	0.007	4.16	2.05	0.49
Exp123201	BC	IDC	Female	48	7.51	4.53	110	0.353	77.9	24.3	312	243	0.734	0.218	0.043	0.004	0.001	5.51	1.64	0.32	0.03	0.01	0.17	48.6	14.4	11.1	0.36	2.7		Exp152079	HC	Female	70	7.45	4.2	129	0.386	91.9	30.7	334	193	0.442	0.466	0.078	0.011	0.003	3.3	3.47	0.58
Exp123228	BC	IDC	Female	50	16.06	4.34	94	0.331	76.3	21.7	284	245	0.929	0.033	0.037	0	0.001	14.93	0.53	0.59	0	0.01	0	0	11.7	9.7	0.23	2.4		Exp152080	HC	Female	40	7.53	5.05	146	0.439	86.9	28.9	333	251	0.624	0.272	0.042	0.054	0.008	4.69	2.05	0.32
Exp123102	BC	IDC	Female	52	8.03	4.34	127	0.395	91	29.3	322	337	0.757	0.197	0.044	0.002	0	6.08	1.58	0.35	0.02	0	0.14	45.9	9.8	9.4	0.19	3.2		Exp152081	HC	Female	45	3.68	4.36	116	0.367	84.2	26.6	316	346	0.565	0.302	0.095	0.03	0.008	2.08	1.11	0.35
Exp123186	BC	IDC	Female	56	3	3.9	125	0.376	96.3	32.1	334	174	0.746	0.206	0.032	0.004	0.012	2.2	0.6	0.1	0	0	0.13	45.5	11.5	8.5	0.27	1.8		Exp152069	HC	Female	39	6.51	4.86	129	0.398	81.9	26.5	324	206	0.528	0.39	0.058	0.018	0.006	3.43	2.54	0.38
Exp122905	BC	IDC	Female	75	7.47	3.79	115	0.352	92.9	30.3	327	197	0.702	0.186	0.086	0.025	0.001	5.24	1.39	0.64	0.19	0.01	0.12	41.8	12.5	11	0.32	2.2
Exp123009	BC	IDC	Female	64	7.15	4.29	128	0.406	94.6	29.8	315	285	0.64	0.288	0.057	0.014	0.001	4.57	2.06	0.41	0.1	0.01	0.13	43.5	10.7	9.7	0.23	2.8
Exp123011	BC	IDC	Female	75	8.58	5.31	111	0.362	68.2	20.9	307	289	0.545	0.383	0.055	0.015	0.002	4.67	3.29	0.47	0.13	0.02	0.15	35.4	10.9	10.4	0.28	3
Exp123019	BC	IDC	Female	67	8.16	4.44	133	0.399	89.9	30	333	307	0.684	0.254	0.053	0.004	0.005	5.59	2.07	0.43	0.03	0.04	0.12	39.9	7.9	8	0.09	2.5
Exp123024	BC	IDC	Female	54	6.36	4.8	149	0.439	91.5	31	339	280	0.601	0.314	0.064	0.016	0.005	3.82	2	0.41	0.1	0.03	0.12	40.1	10.6	9.8	0.23	2.7
Exp123025	BC	IDC	Female	64	6.53	5.3	153	0.462	87.2	28.9	331	314	0.764	0.19	0.038	0.003	0.005	4.99	1.24	0.25	0.02	0.03	0.12	39.2	10.3	9.3	0.2	2.9
Exp123026	BC	IDC	Female	53	6.37	4.98	141	0.444	89.2	28.3	318	230	0.592	0.331	0.066	0.009	0.002	3.77	2.11	0.42	0.06	0.01	0.12	40.1	13.4	11.1	0.35	2.5
Exp123027	BC	IDC	Female	54	6.62	4.34	127	0.392	90.3	29.3	324	295	0.763	0.183	0.042	0.009	0.003	5.05	1.21	0.28	0.06	0.02	0.12	40.6	11.4	10	0.25	3
Exp123028	BC	IDC	Female	46	7.42	5	149	0.441	88.2	29.8	338	332	0.574	0.334	0.054	0.03	0.008	4.26	2.48	0.4	0.22	0.06	0.12	39.4	10.5	9.7	0.22	3.2
Exp123033	BC	IDC	Female	51	6.49	3.75	114	0.355	94.7	30.4	321	331	0.648	0.274	0.059	0.014	0.005	4.21	1.78	0.38	0.09	0.03	0.12	42.3	9.7	9.6	0.2	3.2
Exp123034	BC	IDC	Female	47	8.28	5.35	114	0.374	69.9	21.3	305	501	0.654	0.256	0.071	0.014	0.005	5.41	2.12	0.59	0.12	0.04	0.16	39.7	10.6	10	0.25	5
Exp123035	BC	IDC	Female	73	6.38	4.3	121	0.374	87	28.1	324	289	0.515	0.315	0.129	0.033	0.008	3.29	2.01	0.82	0.21	0.05	0.16	50.2	12.2	10.8	0.3	3.1
Exp123042	BC	IDC	Female	58	5.99	4.32	132	0.398	92.1	30.6	332	319	0.609	0.29	0.088	0.01	0.003	3.64	1.74	0.53	0.06	0.02	0.12	39.7	10.1	9.5	0.2	3
Exp123057	BC	IDC	Female	40	6.94	5.15	148	0.446	86.6	28.7	332	255	0.706	0.254	0.027	0.01	0.003	4.9	1.76	0.19	0.07	0.02	0.13	39.6	9.9	9.2	0.17	2.3
Exp123069	BC	IDC	Female	52	6.81	4.15	122	0.375	90.4	29.4	325	299	0.673	0.238	0.081	0.007	0.001	4.58	1.62	0.55	0.05	0.01	0.14	46	10.6	9.9	0.23	3
Exp123085	BC	IDC	Female	47	6.74	4.47	138	0.411	91.9	30.9	336	292	0.743	0.205	0.046	0.003	0.003	5.01	1.38	0.31	0.02	0.02	0.13	42.9	14.2	11.4	0.38	3.3
Exp123107	BC	IDC	Female	56	7.44	4.45	132	0.412	92.6	29.7	320	225	0.629	0.297	0.062	0.009	0.003	4.68	2.21	0.46	0.07	0.02	0.13	44.4	12.7	11	0.33	2.5
Exp123111	BC	IDC	Female	57	4.84	4.29	135	0.402	93.7	31.5	336	226	0.672	0.254	0.064	0.008	0.002	3.25	1.23	0.31	0.04	0.01	0.13	44.6	10.4	9.6	0.21	2.2
Exp123112	BC	IDC	Female	55	5.71	4.81	138	0.405	84.2	28.7	341	254	0.605	0.298	0.074	0.012	0.011	3.46	1.7	0.42	0.07	0.06	0.12	37.3	12.3	10.5	0.29	2.7
Exp123119	BC	IDC	Female	62	6.82	4.26	122	0.369	86.6	28.6	331	274	0.465	0.428	0.063	0.04	0.004	3.17	2.92	0.43	0.27	0.03	0.12	38.2	9.5	9.3	0.19	2.6
Exp123120	BC	IDC	Female	69	10.21	4.61	138	0.416	90.2	29.9	332	326	0.732	0.218	0.042	0.003	0.005	7.47	2.23	0.43	0.03	0.05	0.12	40.9	11.9	10.5	0.29	3.4
Exp123122	BC	IDC	Female	45	10.02	3.67	108	0.339	92.4	29.4	319	144	0.872	0.056	0.054	0.015	0.003	8.74	0.56	0.54	0.15	0.03	0.16	53.6	17.1	12.2	0.41	1.8
Exp123149	BC	IDC	Female	54	5.26	4.19	131	0.399	95.2	31.3	328	289	0.591	0.302	0.093	0.008	0.006	3.11	1.59	0.49	0.04	0.03	0.12	42.6	10.4	9.6	0.21	2.8
Exp123164	BC	IDC	Female	61	5.95	4.4	133	0.392	89.1	30.2	339	213	0.537	0.388	0.069	0.003	0.003	3.19	2.31	0.41	0.02	0.02	0.12	40	16	12.3	0.44	2.6
Exp123166	BC	IDC	Female	56	6.35	4.75	135	0.419	88.2	28.4	322	209	0.738	0.17	0.076	0.005	0.011	4.69	1.08	0.48	0.03	0.07	0.13	43.3	12.2	10.5	0.3	2.2
Exp123175	BC	IDC	Female	52
Exp123182	BC	IDC	Female	47	6.02	4.32	131	0.401	92.8	30.3	327	260	0.755	0.184	0.053	0.005	0.003	4.54	1.11	0.32	0.03	0.02	0.13	44.4	12.5	10.9	0.33	2.8
Exp123183	BC	IDC	Female	62	7.29	4.18	122	0.366	87.6	29.2	333	272	0.533	0.369	0.053	0.04	0.005	3.88	2.69	0.39	0.29	0.04	0.12	38.5	10.2	9.4	0.2	2.6
Exp123184	BC	IDC	Female	70	8.15	4.81	145	0.444	92.3	30.1	327	300	0.672	0.261	0.05	0.011	0.006	5.47	2.13	0.41	0.09	0.05	0.13	42.7	11.8	10.1	0.26	3
Exp123185	BC	IDC	Female	68	4.51	4.15	120	0.38	91.6	28.9	316	313	0.448	0.401	0.131	0.018	0.002	2.02	1.81	0.59	0.08	0.01	0.14	46.8	11.3	10	0.25	3.1
Exp123189	BC	IDC	Female	48	6.26	4.24	134	0.395	93.2	31.6	339	227	0.688	0.24	0.056	0.01	0.006	4.31	1.5	0.35	0.06	0.04	0.13	43.2	8.8	8.5	0.14	1.9
Exp123190	BC	IDC	Female	50	5.18	4.38	139	0.409	93.4	31.7	340	242	0.599	0.322	0.058	0.019	0.002	3.1	1.67	0.3	0.1	0.01	0.12	41.7	11.9	10.4	0.29	2.5
Exp123192	BC	IDC	Female	51	4.77	4.41	138	0.419	95	31.3	329	272	0.654	0.279	0.063	0.002	0.002	3.12	1.33	0.3	0.01	0.01	0.13	44.3	12.7	10.9	0.33	3
Exp123194	BC	IDC	Female	39	5.41	4.45	130	0.412	92.6	29.2	316	205	0.529	0.377	0.068	0.02	0.006	2.86	2.04	0.37	0.11	0.03	0.12	41.1	12.1	10.4	0.29	2.1
Exp123199	BC	IDC	Female	48	6.1	5.63	122	0.384	68.2	21.7	318	235	0.508	0.39	0.079	0.016	0.007	3.1	2.38	0.48	0.1	0.04	0.15	36.3	0	0	0	0
Exp123204	BC	IDC	Female	53	6.05	4.32	136	0.403	93.3	31.5	337	246	0.657	0.291	0.045	0.002	0.005	3.98	1.76	0.27	0.01	0.03	0.12	41.9	12.2	10.4	0.29	2.6
Exp123205	BC	IDC	Female	45	4.91	4.22	130	0.385	91.2	30.8	338	273	0.646	0.291	0.051	0.01	0.002	3.17	1.43	0.25	0.05	0.01	0.12	39.6	11.9	10.2	0.27	2.8
Exp123206	BC	IDC	Female	39	6.6	4.28	133	0.393	91.8	31.1	338	388	0.796	0.147	0.052	0.002	0.003	5.26	0.97	0.34	0.01	0.02	0.12	40.3	11.1	10.2	0.27	4
Exp123207	BC	IDC	Female	56	8.31	4.67	139	0.441	94.4	29.8	315	357	0.612	0.319	0.058	0.006	0.005	5.09	2.65	0.48	0.05	0.04	0.12	42.7	9.9	9.6	0.2	3.4
Exp123210	BC	IDC	Female	48	4.83	3.93	113	0.352	89.6	28.8	321	220	0.588	0.298	0.104	0.006	0.004	2.84	1.44	0.5	0.03	0.02	0.15	48.1	12	10.7	0.29	2.3
Exp123212	BC	IDC	Female	55	5.12	4.19	133	0.383	91.4	31.7	347	302	0.541	0.371	0.068	0.006	0.014	2.77	1.9	0.35	0.03	0.07	0.12	39.6	10.7	9.9	0.24	3
Exp123213	BC	IDC	Female	54	5.13	4.64	142	0.429	92.5	30.6	331	274	0.647	0.251	0.082	0.012	0.008	3.32	1.29	0.42	0.06	0.04	0.12	41.2	10.1	9.6	0.21	2.6
Exp123214	BC	IDC	Female	73	4.03	3.6	111	0.336	93.3	30.8	330	235	0.475	0.419	0.074	0.027	0.005	1.91	1.69	0.3	0.11	0.02	0.13	44.7	11.3	10	0.24	2.4
Exp123219	BC	IDC	Female	34	4.77	4.05	127	0.39	96.3	31.4	326	234	0.528	0.371	0.082	0.017	0.002	2.52	1.77	0.39	0.08	0.01	0.12	41.1	12.6	10.8	0.31	2.5
Exp123220	BC	IDC	Female	52	6.85	3.86	115	0.358	92.7	29.8	321	201	0.704	0.21	0.079	0.004	0.003	4.82	1.44	0.54	0.03	0.02	0.13	45.4	13.3	11.6	0.38	2.3
Exp123230	BC	IDC	Female	32	9.04	4.12	130	0.385	93.4	31.6	338	285	0.812	0.137	0.043	0.004	0.004	7.33	1.24	0.39	0.04	0.04	0.12	42.7	10	9.4	0.2	2.7
Exp123234	BC	IDC	Female	53	7	4.22	130	0.378	89.6	30.8	344	256	0.681	0.24	0.07	0.006	0.003	4.77	1.68	0.49	0.04	0.02	0.12	39.3	11.1	9.8	0.23	2.5
Exp123239	BC	IDC	Female	68	7.43	4.38	131	0.389	88.8	29.9	337	202	0.551	0.37	0.065	0.009	0.005	4.09	2.75	0.48	0.07	0.04	0.12	38.4	11.5	10.2	0.27	2.1
Exp123258	BC	IDC	Female	62	8.04	4.39	136	0.413	94.1	31	329	237	0.676	0.249	0.066	0.005	0.004	5.44	2	0.53	0.04	0.03	0.12	42	13.5	11.3	0.35	2.7
Exp123259	BC	IDC	Female	37	7.39	4.6	135	0.406	88.3	29.3	333	242	0.62	0.307	0.066	0.003	0.004	4.58	2.27	0.49	0.02	0.03	0.12	38.4	12.5	10.5	0.29	2.5
Exp123262	BC	IDC	Female	73	8.78	4.93	147	0.454	92.1	29.8	324	297	0.743	0.196	0.055	0.005	0.001	6.53	1.72	0.48	0.04	0.01	0.12	41.4	15	11.4	0.38	3.4
Exp123276	BC	IDC	Female	59	5.45	4.94	141	0.419	84.8	28.5	337	179	0.569	0.383	0.044	0.004	0	3.1	2.09	0.24	0.02	0	0.12	36.5	13.1	10.8	0.33	1.9
Exp123196	BC	MBC	Female	41	4.9	4	119	0.373	93.3	29.8	319	267	0.452	0.408	0.106	0.024	0.01	2.21	2	0.52	0.12	0.05	0.12	42	9.5	9.4	0.19	2.5
Exp123293	BC	MBC	Female	49	8.72	4.57	146	0.423	92.6	31.9	345	280	0.747	0.181	0.063	0.007	0.002	6.51	1.58	0.55	0.06	0.02	0.12	39.4	14.1	11.4	0.36	3.2
Exp123023	BC	MBC	Female	64	7.72	4.42	137	0.412	93.2	31	333	269	0.497	0.373	0.082	0.04	0.008	3.84	2.88	0.63	0.31	0.06	0.13	43.9	9.6	9.1	0.18	2.4
Exp123113	BC	MBC	Female	51	6.27	5.4	142	0.445	82.4	26.3	319	320	0.559	0.341	0.062	0.033	0.005	3.5	2.14	0.39	0.21	0.03	0.13	38.6	11.1	9.9	0.24	3.2
Exp122997	BC	MBC	Female	52	7.93	4.4	131	0.364	82.7	29.8	360	158	0.757	0.178	0.049	0.011	0.005	6	1.41	0.39	0.09	0.04	0.12	35.9	15.3	11.6	0.38	1.8
Exp123211	BC	MBC	Female	35	5.72	4.44	127	0.385	86.7	28.6	330	282	0.647	0.264	0.07	0.016	0.003	3.7	1.51	0.4	0.09	0.02	0.13	41.1	10.2	9.8	0.22	2.8
Exp123086	BC	MBC	Female	30	8.4	4.04	120	0.353	87.4	29.7	340	214	0.742	0.186	0.054	0.017	0.001	6.24	1.56	0.45	0.14	0.01	0.12	38.7	10.9	9.9	0.23	2.1
Exp123197	BC	MBC	Female	48	7	4.43	132	0.396	89.4	29.8	333	336	0.546	0.393	0.047	0.011	0.003	3.82	2.75	0.33	0.08	0.02	0.14	45.4	10.9	9.8	0.23	3.3
Exp123141	BC	MBC	Female	63	6.78	2.82	81	0.257	91.1	28.7	315	169	0.828	0.127	0.044	0.001	0	5.61	0.86	0.3	0.01	0	0.14	46.1	11.5	10.7	0.29	1.8
Exp122974	BC	MBC	Female	52	9.45	3.61	107	0.326	90.3	29.6	328	306	0.771	0.133	0.072	0.023	0.001	7.28	1.26	0.68	0.22	0.01	0.13	43.4	10.7	9.6	0.22	2.9
Exp123021	BC	MBC	Female	51	5.59	4.28	124	0.386	90.2	29	321	170	0.731	0.156	0.068	0.041	0.004	4.09	0.87	0.38	0.23	0.02	0.13	43.2	15.9	12.1	0.42	2.1
Exp122987	BC	MBC	Female	50	6.7	4.3	127	0.378	87.9	29.5	336	277	0.712	0.191	0.048	0.045	0.004	4.77	1.28	0.32	0.3	0.03	0.12	39.2	11.7	10.5	0.29	2.9
Exp123010	BC	MBC	Female	69	14.76	5.13	102	0.337	65.7	19.9	303	443	0.839	0.096	0.03	0.03	0.005	12.39	1.41	0.44	0.44	0.08	0.2	44.8	0	0	0	0
Exp123013	BC	MBC	Female	66	7.18	4.51	143	0.439	97.3	31.7	326	265	0.588	0.329	0.065	0.011	0.007	4.22	2.36	0.47	0.08	0.05	0.11	40	15.5	11.9	0.4	3.2
Exp123016	BC	MBC	Female	62	5.54	4.56	139	0.413	90.6	30.5	337	258	0.709	0.222	0.063	0.002	0.004	3.93	1.23	0.35	0.01	0.02	0.12	39.9	11.8	10.3	0.28	2.7
Exp123020	BC	MBC	Female	73	8.83	5.07	151	0.467	92.1	29.8	323	293	0.8	0.152	0.045	0.001	0.002	7.06	1.34	0.4	0.01	0.02	0.13	42.8	14.8	11.9	0.41	3.5
Exp123022	BC	MBC	Female	49	6.78	4.38	134	0.399	91.1	30.6	336	233	0.639	0.289	0.053	0.013	0.006	4.33	1.96	0.36	0.09	0.04	0.12	39.9	11.1	10.2	0.25	2.4
Exp123030	BC	MBC	Female	54	5.58	4.79	149	0.443	92.5	31.1	336	190	0.576	0.349	0.043	0.025	0.007	3.21	1.95	0.24	0.14	0.04	0.12	41.2	11.2	9.6	0.23	1.8
Exp123046	BC	MBC	Female	45	3.95	3.73	116	0.352	94.4	31.1	330	268	0.549	0.289	0.129	0.023	0.01	2.17	1.14	0.51	0.09	0.04	0.18	61.4	18.1	12.3	0.44	3.3
Exp123050	BC	MBC	Female	42	7.85	3.99	125	0.385	96.5	31.3	325	243	0.72	0.21	0.064	0.003	0.003	5.66	1.65	0.5	0.02	0.02	0.13	45.1	10.9	10.3	0.27	2.5
Exp123051	BC	MBC	Female	74	12.4	4.22	116	0.354	83.9	27.5	328	274	0.619	0.286	0.065	0.025	0.005	7.67	3.55	0.81	0.31	0.06	0.14	42.2	14.4	11.6	0.37	3.2
Exp123059	BC	MBC	Female	66	7.13	4.55	139	0.428	94.1	30.5	325	234	0.605	0.262	0.107	0.022	0.004	4.31	1.87	0.76	0.16	0.03	0.14	47.1	11	10.5	0.28	2.4
Exp123070	BC	MBC	Female	50	5.87	5.01	135	0.424	84.6	26.9	318	324	0.686	0.227	0.072	0.01	0.005	4.03	1.33	0.42	0.06	0.03	0.13	40.1	9.3	9.3	0.18	3
Exp123118	BC	MBC	Female	51	6.47	4.6	138	0.422	91.7	30	327	314	0.531	0.317	0.121	0.023	0.008	3.44	2.05	0.78	0.15	0.05	0.12	40.7	11.4	10.3	0.27	3.2
Exp123131	BC	MBC	Female	48	6.22	4.97	149	0.442	88.9	30	337	266	0.585	0.33	0.069	0.014	0.002	3.64	2.05	0.43	0.09	0.01	0.13	42.9	11.2	9.9	0.24	2.6
Exp123151	BC	MBC	Female	42	13.53	5.05	125	0.4	79.2	24.8	313	360	0.699	0.235	0.052	0.012	0.002	9.45	3.18	0.71	0.16	0.03	0.15	41.8	8.3	8.3	0.11	3
Exp123158	BC	MBC	Female	53	8.72	4.84	137	0.417	86.2	28.3	329	333	0.604	0.335	0.045	0.014	0.002	5.27	2.92	0.39	0.12	0.02	0.12	39.2	10.3	9.6	0.21	3.2
Exp123171	BC	MBC	Female	61	8.37	4.29	138	0.417	97.2	32.2	331	273	0.765	0.185	0.043	0.005	0.002	6.4	1.55	0.36	0.04	0.02	0.11	39.6	10.4	9.5	0.21	2.6
Exp123172	BC	MBC	Female	54	12.38	4.76	141	0.418	87.8	29.6	337	382	0.702	0.228	0.063	0.002	0.005	8.7	2.82	0.78	0.02	0.06	0.12	38.8	11.2	9.9	0.25	3.8
Exp123188	BC	MBC	Female	63	4.82	4.91	137	0.428	87.2	27.9	320	225	0.576	0.32	0.075	0.019	0.01	2.78	1.54	0.36	0.09	0.05	0.13	40	14	11.3	0.35	2.5
Exp123193	BC	MBC	Female	49	8.82	4.66	137	0.409	87.8	29.4	335	310	0.765	0.177	0.051	0.002	0.005	6.75	1.56	0.45	0.02	0.04	0.13	41.2	9.8	9.4	0.18	2.9
Exp123200	BC	MBC	Female	46	7.89	4.43	134	0.4	90.3	30.2	335	279	0.745	0.166	0.067	0.014	0.008	5.88	1.31	0.53	0.11	0.06	0.11	37.4	12.2	10.5	0.29	2.9
Exp123203	BC	MBC	Female	78	5.81	6.51	111	0.372	57.1	17.1	298	232	0.528	0.367	0.09	0.01	0.005	3.07	2.13	0.52	0.06	0.03	0.19	32.3	0	0	0	0
Exp123229	BC	MBC	Female	45	9.04	4.45	133	0.398	89.4	29.9	334	261	0.651	0.269	0.052	0.022	0.006	5.89	2.43	0.47	0.2	0.05	0.13	41.7	10.3	9.4	0.2	2.5
Exp123232	BC	MBC	Female	39	6.94	4.65	139	0.411	88.4	29.9	338	353	0.571	0.32	0.056	0.05	0.003	3.96	2.22	0.39	0.35	0.02	0.12	36.9	8.2	8	0.09	2.8
Exp123233	BC	MBC	Female	58	7.08	4.65	139	0.412	88.6	29.9	337	230	0.591	0.342	0.044	0.017	0.006	4.19	2.42	0.31	0.12	0.04	0.13	42.2	11.3	10.1	0.26	2.3
Exp123235	BC	MBC	Female	46	7.32	2.94	39	0.166	56.5	13.3	235	420	0.766	0.152	0.071	0.01	0.001	5.61	1.11	0.52	0.07	0.01	0.23	42.9	0	0	0	0
Exp123238	BC	MBC	Female	57	6.99	4.13	124	0.372	90.1	30	333	307	0.679	0.273	0.04	0.004	0.004	4.74	1.91	0.28	0.03	0.03	0.12	39.9	13.8	11.4	0.37	3.5
Exp123240	BC	MBC	Female	40	4.19	4.32	133	0.395	91.4	30.8	337	267	0.54	0.382	0.05	0.021	0.007	2.26	1.6	0.21	0.09	0.03	0.11	37.7	9.9	9	0.17	2.4
Exp123253	BC	MBC	Female	50	10.28	4.86	143	0.434	89.3	29.4	329	261	0.712	0.212	0.071	0.003	0.002	7.32	2.18	0.73	0.03	0.02	0.12	39.1	11	10	0.24	2.6
Exp123257	BC	MBC	Female	33	6.1	4.24	91	0.285	67.2	21.4	318	309	0.546	0.357	0.087	0.004	0.006	3.3	2.2	0.5	0	0	0.2	47.7	8.4	0	0	0
Exp122938	BBT	Papilloma	Female	43	5.75	4.4	125	0.388	88.2	28.4	322	271	0.686	0.212	0.09	0.005	0.007	3.94	1.22	0.52	0.03	0.04	0.13	41	12	10.5	0.28	2.8
Exp123047	BBT	Papilloma	Female	46
Exp123055	BBT	Papilloma	Female	42	9.41	4.03	127	0.374	92.8	31.5	340	380	0.811	0.152	0.033	0	0.004	7.63	1.43	0.31	0	0.04	0.12	39.8	9.9	9.4	0.2	3.6
Exp123066	BBT	Papilloma	Female	45	6.49	4.12	127	0.387	93.9	30.8	328	207	0.719	0.219	0.052	0.005	0.005	4.67	1.42	0.34	0.03	0.03	0.13	44.9	15.5	12.7	0.47	2.6
Exp123072	BBT	Papilloma	Female	43	5.83	4.13	127	0.378	91.5	30.8	336	229	0.554	0.355	0.081	0.003	0.007	3.23	2.07	0.47	0.02	0.04	0.12	38.5	12.7	10.9	0.31	2.5
Exp123083	BBT	Papilloma	Female	39	5.77	4.37	124	0.387	88.6	28.4	320	218	0.729	0.224	0.042	0.002	0.003	4.21	1.29	0.24	0.01	0.02	0.13	42.5	11.5	10.7	0.3	2.3
Exp123084	BBT	Papilloma	Female	43	7.93	4.7	139	0.419	89.1	29.6	332	367	0.533	0.417	0.044	0.003	0.003	4.23	3.31	0.35	0.02	0.02	0.12	40.3	10.7	9.6	0.21	3.5
Exp123088	BBT	Papilloma	Female	44	3.59	4.08	126	0.387	94.9	30.9	326	251	0.615	0.273	0.092	0.017	0.003	2.21	0.98	0.33	0.06	0.01	0.12	42	10.3	9.2	0.18	2.3
Exp123089	BBT	Papilloma	Female	57	4.93	4.26	130	0.391	91.8	30.5	332	237	0.546	0.381	0.059	0.012	0.002	2.69	1.88	0.29	0.06	0.01	0.13	41.7	8.6	8.9	0.15	2.1
Exp123092	BBT	Papilloma	Female	41	6.91	3.88	125	0.369	95.1	32.2	339	262	0.558	0.357	0.064	0.017	0.004	3.85	2.47	0.44	0.12	0.03	0.13	43.8	10.8	9.8	0.22	2.6
Exp123097	BBT	Papilloma	Female	42	5.77	4.55	143	0.415	91.2	31.4	345	258	0.576	0.321	0.095	0.005	0.003	3.32	1.85	0.55	0.03	0.02	0.13	41.5	11	10	0.24	2.6
Exp123105	BBT	Papilloma	Female	49	6.25	4.97	151	0.452	90.9	30.4	334	221	0.648	0.261	0.062	0.024	0.005	4.05	1.63	0.39	0.15	0.03	0.12	38.6	13.6	11.6	0.38	2.6
Exp123114	BBT	Papilloma	Female	38	4.21	4.34	126	0.392	90.3	29	321	200	0.615	0.264	0.102	0.017	0.002	2.59	1.11	0.43	0.07	0.01	0.14	45.5	12.2	10.3	0.27	2.1
Exp123124	BBT	Papilloma	Female	47	9.2	4.88	105	0.361	74	21.5	291	498	0.661	0.265	0.051	0.018	0.005	6.07	2.44	0.47	0.17	0.05	0.16	43.7	10.6	9.7	0.22	4.8
Exp123130	BBT	Papilloma	Female	43	7.73	4.56	142	0.417	91.4	31.1	341	316	0.683	0.257	0.056	0.001	0.003	5.28	1.99	0.43	0.01	0.02	0.12	39.2	10.6	9.8	0.23	3.1
Exp123132	BBT	Papilloma	Female	49	5.34	3.94	124	0.373	94.7	31.5	332	344	0.497	0.369	0.082	0.037	0.015	2.65	1.97	0.44	0.2	0.08	0.12	42.2	12.5	10.5	0.29	3.6
Exp123146	BBT	Papilloma	Female	47	7.79	4.48	131	0.398	88.8	29.2	329	283	0.648	0.239	0.073	0.036	0.004	5.05	1.86	0.57	0.28	0.03	0.13	43.5	10.8	9.8	0.23	2.8
Exp123148	BBT	Papilloma	Female	32	4.77	3.92	113	0.35	89.3	28.8	323	207	0.669	0.273	0.046	0.008	0.004	3.19	1.3	0.22	0.04	0.02	0.13	42.5	15.8	11.7	0.4	2.4
Exp123177	BBT	Papilloma	Female	41	5.05	4.61	128	0.386	83.7	27.8	332	336	0.646	0.253	0.059	0.034	0.008	3.26	1.28	0.3	0.17	0.04	0.13	39.6	9.9	9.5	0.21	3.2
Exp123269	BBT	Papilloma	Female	48	5.32	4.74	146	0.443	93.5	30.8	330	290	0.653	0.269	0.06	0.009	0.009	3.47	1.43	0.32	0.05	0.05	0.13	45.5	10.6	10.1	0.25	2.9
Exp123275	BBT	Papilloma	Female	31	5.19	4.18	120	0.37	88.5	28.7	324	281	0.526	0.362	0.102	0.008	0.002	2.73	1.88	0.53	0.04	0.01	0.14	44.1	10.8	10.4	0.27	2.9
Exp122910	BBT	Fibroma	Female	41	8.34	4.54	136	0.401	88.3	30	339	332	0.692	0.246	0.05	0.011	0.001	5.77	2.05	0.42	0.09	0.01	0.13	39.8	10.5	9.4	0.2	3.1
Exp122926	BBT	Fibroma	Female	28	6.03	5.05	146	0.444	87.9	28.9	329	232	0.568	0.348	0.06	0.017	0.007	3.43	2.1	0.36	0.1	0.04	0.12	39.2	11.4	10.2	0.28	2.4
Exp122978	BBT	Fibroma	Female	54	4.92	4.24	120	0.368	86.8	28.3	326	356	0.665	0.254	0.069	0.01	0.002	3.27	1.25	0.34	0.05	0.01	0.13	41.2	10.9	9.9	0.24	3.5
Exp122980	BBT	Fibroma	Female	27	5.68	5.13	152	0.431	84	29.6	353	287	0.578	0.349	0.053	0.018	0.002	3.29	1.98	0.3	0.1	0.01	0.12	35.2	12.1	10	0.26	2.9
Exp122986	BBT	Fibroma	Female	36	10.01	4.43	135	0.392	88.5	30.5	344	256	0.767	0.179	0.041	0.009	0.004	7.68	1.79	0.41	0.09	0.04	0.12	38	9.9	9.4	0.19	2.4
Exp122992	BBT	Fibroma	Female	39	7.69	4.88	130	0.396	81.1	26.6	328	301	0.502	0.381	0.073	0.039	0.005	3.86	2.93	0.56	0.3	0.04	0.13	39.7	10.7	9.9	0.24	3
Exp122999	BBT	Fibroma	Female	44	5.9	4.31	136	0.405	93.9	31.7	337	272	0.595	0.318	0.074	0.01	0.003	3.5	1.9	0.4	0.1	0	0.13	42.9	8.1	0	0	0
Exp123037	BBT	Fibroma	Female	44	6.97	4.39	134	0.41	93.4	30.5	327	261	0.749	0.198	0.049	0.001	0.003	5.22	1.38	0.34	0.01	0.02	0.13	43.4	10.6	9.5	0.21	2.5
Exp123039	BBT	Fibroma	Female	50	14.11	4.44	125	0.383	86.3	28.2	326	215	0.866	0.098	0.035	0	0.001	12.22	1.38	0.5	0	0.01	0.15	46.5	12.4	10.8	0.31	2.3
Exp123040	BBT	Fibroma	Female	51	7.55	6.19	127	0.424	68.5	20.5	300	305	0.535	0.336	0.066	0.058	0.005	4.03	2.54	0.5	0.44	0.04	0.19	39	14.5	11.5	0.36	3.5
Exp123041	BBT	Fibroma	Female	24	7.56	4.55	136	0.403	88.6	29.9	337	224	0.498	0.429	0.065	0.005	0.003	3.77	3.24	0.49	0.04	0.02	0.12	38.4	11.2	10	0.25	2.2
Exp123043	BBT	Fibroma	Female	55	7.73	4.37	132	0.407	93.1	30.2	324	283	0.617	0.326	0.045	0.006	0.006	4.76	2.52	0.35	0.05	0.05	0.12	40.9	11.5	9.9	0.24	2.8
Exp123044	BBT	Fibroma	Female	52	4.69	4.57	132	0.395	86.4	28.9	334	163	0.56	0.362	0.053	0.021	0.004	2.62	1.7	0.25	0.1	0.02	0.13	40.1	17.6	12.2	0.43	2
Exp123045	BBT	Fibroma	Female	21	5.18	4.21	127	0.373	88.6	30.2	340	203	0.49	0.378	0.089	0.041	0.002	2.54	1.96	0.46	0.21	0.01	0.12	36.9	11.8	10.7	0.3	2.2
Exp123048	BBT	Fibroma	Female	33	4.87	4.46	131	0.409	91.7	29.4	320	231	0.555	0.355	0.068	0.014	0.008	2.7	1.73	0.33	0.07	0.04	0.13	44.2	11.7	10.1	0.26	2.3
Exp123049	BBT	Fibroma	Female	39	5.3	4.57	139	0.41	89.7	30.4	339	275	0.385	0.515	0.055	0.036	0.009	2.04	2.73	0.29	0.19	0.05	0.12	38.4	9.7	9.3	0.19	2.6
Exp123053	BBT	Fibroma	Female	47	8.34	4.71	117	0.367	77.9	24.8	319	341	0.715	0.181	0.098	0.005	0.001	5.96	1.51	0.82	0.04	0.01	0.15	40.7	9.9	9.7	0.22	3.3
Exp123054	BBT	Fibroma	Female	56	4.45	4.46	133	0.407	91.3	29.8	327	242	0.641	0.315	0.04	0.002	0.002	2.85	1.4	0.18	0.01	0.01	0.11	38.2	11.2	10.1	0.26	2.4
Exp123058	BBT	Fibroma	Female
Exp123061	BBT	Fibroma	Female	61	6.31	4.04	126	0.368	91.1	31.2	342	186	0.61	0.296	0.073	0.016	0.005	3.85	1.87	0.46	0.1	0.03	0.12	38.9	12.7	11	0.33	2
Exp123063	BBT	Fibroma	Female	35	7.39	4.55	106	0.343	75.4	23.3	309	398	0.699	0.234	0.053	0.009	0.005	5.16	1.73	0.39	0.07	0.04	0.18	48.9	9.9	9.3	0.19	3.7
Exp123064	BBT	Fibroma	Female	35	8.11	4.74	128	0.395	83.3	27	324	290	0.589	0.309	0.085	0.012	0.005	4.77	2.51	0.69	0.1	0.04	0.13	39.8	9.9	9	0.17	2.6
Exp123065	BBT	Fibroma	Female	40	7.63	4.25	124	0.389	91.5	29.2	319	375	0.662	0.263	0.048	0.022	0.005	5.04	2.01	0.37	0.17	0.04	0.12	39.8	11.8	10.2	0.27	3.8
Exp123067	BBT	Fibroma	Female	48	7.11	4.23	130	0.395	93.4	30.7	329	476	0.608	0.305	0.066	0.015	0.006	4.32	2.17	0.47	0.11	0.04	0.13	43.8	8.8	8.7	0.14	4.2
Exp123068	BBT	Fibroma	Female	53	8.09	4.53	137	0.419	92.5	30.2	327	393	0.702	0.239	0.053	0.002	0.004	5.68	1.93	0.43	0.02	0.03	0.12	40.1	9.7	9.3	0.19	3.7
Exp123071	BBT	Fibroma	Female	37
Exp123076	BBT	Fibroma	Female	25	6.1	4.1	129	0.388	94.6	31.5	332	241	0.793	0.097	0.067	0.041	0.002	4.84	0.59	0.41	0.25	0.01	0.15	51.3	10.1	9.8	0.22	2.4
Exp123080	BBT	Fibroma	Female
Exp123091	BBT	Fibroma	Female	38	6.06	5.03	138	0.422	83.9	27.4	327	385	0.654	0.282	0.053	0.008	0.003	3.96	1.71	0.32	0.05	0.02	0.12	37.5	10	9.5	0.2	3.7
Exp123093	BBT	Fibroma	Female	24	7.9	5.28	142	0.445	84.3	26.9	319	275	0.688	0.232	0.072	0.004	0.004	5.44	1.83	0.57	0.03	0.03	0.14	42.5	12	10.5	0.29	2.9
Exp123095	BBT	Fibroma	Female	30	5.18	5	103	0.346	69.2	20.6	298	397	0.598	0.266	0.091	0.039	0.006	3.1	1.38	0.47	0.2	0.03	0.18	42.6	11.6	10.3	0.27	4.1
Exp123099	BBT	Fibroma	Female	26	7.56	4.38	119	0.368	84	27.2	323	308	0.608	0.275	0.083	0.029	0.005	4.59	2.08	0.63	0.22	0.04	0.12	36.8	11.7	10.4	0.28	3.2
Exp123100	BBT	Fibroma	Female	47	5.5	4.43	133	0.397	89.6	30	335	176	0.7	0.238	0.047	0.013	0.002	3.85	1.31	0.26	0.07	0.01	0.12	37.4	11.8	10.3	0.27	1.8
Exp123101	BBT	Fibroma	Female	26	6.9	5.53	120	0.389	70.3	21.7	308	310	0.546	0.374	0.061	0.016	0.003	3.77	2.58	0.42	0.11	0.02	0.15	37.1	10.9	10.2	0.26	3.2
Exp123103	BBT	Fibroma	Female	50	7.31	3.72	80	0.276	74.2	21.5	290	350	0.683	0.234	0.067	0.012	0.004	4.99	1.71	0.49	0.09	0.03	0.15	40.1	16	12.4	0.42	4.3
Exp123108	BBT	Fibroma	Female	47	6.47	4.25	134	0.391	92	31.5	343	320	0.539	0.38	0.068	0.005	0.008	3.49	2.46	0.44	0.03	0.05	0.13	42.5	10.4	9.6	0.22	3.1
Exp123109	BBT	Fibroma	Female	30	7.19	4.68	142	0.428	91.5	30.3	332	341	0.443	0.446	0.082	0.018	0.011	3.18	3.21	0.59	0.13	0.08	0.12	40.8	9.5	8.9	0.16	3
Exp123110	BBT	Fibroma	Female	43	6.67	4.44	129	0.395	89	29.1	327	349	0.746	0.204	0.04	0.007	0.003	4.97	1.36	0.27	0.05	0.02	0.13	41.1	10.5	9.4	0.2	3.3
Exp123123	BBT	Fibroma	Female	55	4.91	4.71	144	0.428	90.9	30.6	336	312	0.485	0.45	0.059	0.004	0.002	2.38	2.21	0.29	0.02	0.01	0.13	42.1	9.5	9.3	0.19	2.9
Exp123125	BBT	Fibroma	Female	20	5.31	4.78	135	0.407	85.1	28.2	332	209	0.652	0.267	0.077	0.002	0.002	3.46	1.42	0.41	0.01	0.01	0.12	36.6	14.2	11	0.33	2.3
Exp123127	BBT	Fibroma	Female	28	6.58	4.32	134	0.399	92.4	31	336	224	0.582	0.327	0.076	0.012	0.003	3.83	2.15	0.5	0.08	0.02	0.13	44.4	10.8	10.1	0.25	2.3
Exp123128	BBT	Fibroma	Female	40	6.92	4.39	129	0.39	88.8	29.4	331	289	0.799	0.149	0.045	0.003	0.004	5.53	1.03	0.31	0.02	0.03	0.13	40.8	13.3	11.3	0.35	3.3
Exp123129	BBT	Fibroma	Female	59	10.67	4.86	139	0.415	85.4	28.6	335	480	0.546	0.356	0.07	0.022	0.006	5.83	3.8	0.75	0.23	0.06	0.13	39.8	9	8.6	0.14	4.1
Exp123133	BBT	Fibroma	Female	58	4.09	4.59	125	0.381	83	27.2	328	216	0.533	0.369	0.059	0.034	0.005	2.18	1.51	0.24	0.14	0.02	0.13	37.6	9.5	9.3	0.19	2
Exp123135	BBT	Fibroma	Female	43	4.7	4	128	0.377	94.3	32	340	234	0.583	0.364	0.045	0.004	0.004	2.74	1.71	0.21	0.02	0.02	0.12	41.7	12.3	10.6	0.3	2.5
Exp123137	BBT	Fibroma	Female	34
Exp123138	BBT	Fibroma	Female	43	6.1	4.28	139	0.397	92.8	32.5	350	292	0.504	0.398	0.075	0.018	0.005	3.07	2.43	0.46	0.11	0.03	0.12	40	11.3	10	0.24	2.9
Exp123140	BBT	Fibroma	Female	32	5.18	4.09	129	0.38	92.9	31.5	339	237	0.61	0.301	0.071	0.014	0.004	3.16	1.56	0.37	0.07	0.02	0.12	40.2	10	9.3	0.19	2.2
Exp123142	BBT	Fibroma	Female	20	5.49	4.52	137	0.393	86.9	30.3	349	260	0.522	0.399	0.066	0.011	0.002	2.87	2.19	0.36	0.06	0.01	0.12	37.2	10.2	9.5	0.2	2.5
Exp123144	BBT	Fibroma	Female	44	7.55	4.3	126	0.385	89.5	29.3	327	262	0.755	0.18	0.053	0.008	0.004	5.7	1.36	0.4	0.06	0.03	0.13	42.7	13	11	0.34	2.9
Exp123145	BBT	Fibroma	Female	44	5.73	4.4	132	0.404	91.8	30	327	243	0.636	0.284	0.058	0.017	0.005	3.64	1.63	0.33	0.1	0.03	0.12	40.4	9.8	9.3	0.19	2.3
Exp123153	BBT	Fibroma	Female	48	4.93	4.2	126	0.381	90.7	30	331	294	0.613	0.312	0.071	0.004	0	3.02	1.54	0.35	0.02	0	0.13	41.1	9.4	9.1	0.17	2.7
Exp123154	BBT	Fibroma	Female	65	5.25	4.18	131	0.398	95.2	31.3	329	217	0.601	0.29	0.069	0.034	0.006	3.16	1.52	0.36	0.18	0.03	0.12	41.9	13.6	11.1	0.33	2.4
Exp123156	BBT	Fibroma	Female	30	7.32	4.26	132	0.407	95.5	31	324	316	0.579	0.362	0.051	0.005	0.003	4.24	2.65	0.37	0.04	0.02	0.13	43.8	11.5	10.2	0.26	3.2
Exp123157	BBT	Fibroma	Female	39	5.18	4.49	136	0.415	92.4	30.3	328	304	0.651	0.301	0.046	0.002	0	3.37	1.56	0.24	0.01	0	0.12	39.1	12.1	10.3	0.27	3.1
Exp123159	BBT	Fibroma	Female	37	5.75	4.53	136	0.401	88.5	30	339	241	0.594	0.325	0.064	0.014	0.003	3.41	1.87	0.37	0.08	0.02	0.12	37.9	12.8	11	0.33	2.6
Exp123160	BBT	Fibroma	Female	39	4.93	4.53	139	0.42	92.7	30.7	331	263	0.568	0.355	0.065	0.008	0.004	2.8	1.75	0.32	0.04	0.02	0.13	43.1	10.8	10.1	0.25	2.7
Exp123161	BBT	Fibroma	Female	37	5.32	4.15	118	0.358	86.3	28.4	330	282	0.616	0.293	0.07	0.017	0.004	3.28	1.56	0.37	0.09	0.02	0.13	41.2	11	10.3	0.26	2.9
Exp123162	BBT	Fibroma	Female	25	6.13	4.49	127	0.403	89.8	28.3	315	316	0.645	0.259	0.07	0.021	0.005	3.95	1.59	0.43	0.13	0.03	0.13	43.3	11.9	10.3	0.28	3.3
Exp123163	BBT	Fibroma	Female	25	6.89	5.46	120	0.405	74.2	22	296	423	0.568	0.319	0.096	0.016	0.001	3.91	2.2	0.66	0.11	0.01	0.17	45.5	15.2	11.8	0.38	5
Exp123165	BBT	Fibroma	Female	20	6	4.24	135	0.402	94.8	31.8	336	208	0.467	0.44	0.068	0.02	0.005	2.8	2.64	0.41	0.12	0.03	0.13	44.8	14	11.5	0.37	2.4
Exp123167	BBT	Fibroma	Female	47	5.66	4.46	127	0.378	84.8	28.5	336	266	0.587	0.339	0.053	0.016	0.005	3.32	1.92	0.3	0.09	0.03	0.13	39.5	9.1	9.2	0.17	2.4
Exp123168	BBT	Fibroma	Female	39	7.18	4.84	146	0.434	89.7	30.2	336	279	0.715	0.206	0.071	0.008	0	5.13	1.48	0.51	0.06	0	0.12	39.9	13.3	11	0.33	3.1
Exp123170	BBT	Fibroma	Female	52	7.13	4.29	128	0.38	88.6	29.8	337	174	0.616	0.325	0.042	0.011	0.006	4.39	2.32	0.3	0.08	0.04	0.13	41.2	14.8	11.8	0.39	2
Exp123173	BBT	Fibroma	Female	42	6.23	4.35	129	0.402	92.4	29.7	321	182	0.555	0.355	0.074	0.01	0.006	3.46	2.21	0.46	0.06	0.04	0.13	42.5	12.3	10.8	0.32	2
Exp123176	BBT	Fibroma	Female	29	7.12	4.27	114	0.365	85.5	26.7	312	313	0.633	0.275	0.056	0.028	0.008	4.5	1.96	0.4	0.2	0.06	0.12	37	12.3	11	0.32	3.5
Exp123178	BBT	Fibroma	Female	42	3.55	4.05	121	0.37	91.4	29.9	327	147	0.6	0.279	0.107	0.011	0.003	2.13	0.99	0.38	0.04	0.01	0.13	44.5	11.2	10.5	0.29	1.5
Exp123180	BBT	Fibroma	Female	18	4.15	4.7	142	0.417	88.7	30.2	341	174	0.511	0.422	0.06	0.007	0	2.12	1.75	0.25	0.03	0	0.12	37.8	12.4	10.6	0.29	1.9
Exp123195	BBT	Fibroma	Female	22	7.54	3.91	119	0.36	92.1	30.4	331	260	0.699	0.214	0.076	0.003	0.008	5.28	1.61	0.57	0.02	0.06	0.12	41.8	10.7	9.9	0.24	2.6
Exp123217	BBT	Fibroma	Female	42	5.44	3.41	98	0.303	88.9	28.7	323	378	0.705	0.243	0.044	0.006	0.002	3.84	1.32	0.24	0.03	0.01	0.14	46	9.4	9.4	0.19	3.5
Exp123218	BBT	Fibroma	Female	37	7.95	4.63	118	0.36	77.8	25.5	328	289	0.643	0.274	0.064	0.016	0.003	5.11	2.18	0.51	0.13	0.02	0.16	45.6	12	11.2	0.33	3.2
Exp123222	BBT	Fibroma	Female	51	7.39	4.03	122	0.355	88.1	30.3	344	247	0.55	0.357	0.077	0.012	0.004	4.06	2.64	0.57	0.09	0.03	0.12	38.5	12.2	10.4	0.28	2.6
Exp123224	BBT	Fibroma	Female	27	5.59	3.87	130	0.376	97.2	33.6	346	232	0.467	0.433	0.068	0.027	0.005	2.61	2.42	0.38	0.15	0.03	0.11	38.7	10.7	10.1	0.25	2.3
Exp123225	BBT	Fibroma	Female	49	5.9	4.26	134	0.397	93.2	31.5	338	278	0.523	0.39	0.073	0.012	0.002	3.09	2.3	0.43	0.07	0.01	0.13	43.4	10.6	9.9	0.23	2.7
Exp123241	BBT	Fibroma	Female	26	6.13	5.26	149	0.451	85.7	28.3	330	285	0.547	0.338	0.047	0.06	0.008	3.35	2.07	0.29	0.37	0.05	0.12	38.8	10.8	9.9	0.24	2.8
Exp123242	BBT	Fibroma	Female	50	6.46	4.87	145	0.421	86.4	29.8	344	284	0.542	0.354	0.077	0.022	0.005	3.5	2.29	0.5	0.14	0.03	0.13	39.7	11.2	10.1	0.26	2.9
Exp123243	BBT	Fibroma	Female	54	8.96	4.5	134	0.408	90.7	29.8	328	270	0.859	0.112	0.025	0.002	0.002	7.7	1	0.22	0.02	0.02	0.12	38.9	13.7	11.4	0.36	3.1
Exp123244	BBT	Fibroma	Female	36	4.78	4.49	119	0.365	81.3	26.5	326	274	0.524	0.37	0.094	0.01	0.002	2.5	1.77	0.45	0.05	0.01	0.15	44.8	11.9	10.9	0.3	3
Exp123245	BBT	Fibroma	Female	37
Exp123249	BBT	Fibroma	Female	58	4.23	4.09	125	0.377	92.2	30.6	332	218	0.353	0.522	0.085	0.033	0.007	1.49	2.21	0.36	0.14	0.03	0.12	41	10.9	9.9	0.24	2.2
Exp123250	BBT	Fibroma	Female	56	7.77	4.76	141	0.43	90.3	29.6	328	307	0.623	0.288	0.051	0.035	0.003	4.84	2.24	0.4	0.27	0.02	0.13	43.5	11	9.8	0.23	3
Exp123252	BBT	Fibroma	Female		7.32	3.74	115	0.357	95.5	30.7	322	292	0.713	0.225	0.056	0.003	0.003	5.22	1.65	0.41	0.02	0.02	0.12	41.4	11.6	10.2	0.27	3
Exp123265	BBT	Fibroma	Female	27	7.44	4.28	129	0.398	93	30.1	324	331	0.619	0.298	0.063	0.017	0.003	4.6	2.22	0.47	0.13	0.02	0.12	39.4	10.9	10.1	0.25	3.3
Exp123266	BBT	Fibroma	Female	28	4.4	4.79	133	0.404	84.3	27.8	329	252	0.545	0.355	0.066	0.018	0.016	2.4	1.56	0.29	0.08	0.07	0.14	42.4	11	10.5	0.27	2.7
Exp123268	BBT	Fibroma	Female	52	3.98	4.36	133	0.409	93.8	30.5	325	287	0.5	0.392	0.08	0.02	0.008	1.99	1.56	0.32	0.08	0.03	0.13	45.5	10.1	9.6	0.21	2.8
Exp123270	BBT	Fibroma	Female	44
Exp123271	BBT	Fibroma	Female	44	5.93	4.84	130	0.4	82.6	26.9	325	377	0.516	0.374	0.086	0.019	0.005	3.06	2.22	0.51	0.11	0.03	0.13	39.3	9.9	9.3	0.19	3.5
Exp123272	BBT	Fibroma	Female	43	6.58	4.21	127	0.369	87.6	30.2	344	241	0.584	0.327	0.07	0.014	0.005	3.85	2.15	0.46	0.09	0.03	0.12	37.9	12.7	10.8	0.31	2.6
Exp123273	BBT	Fibroma	Female	56	7.1	4.14	120	0.375	90.6	29	320	214	0.658	0.237	0.069	0.03	0.006	4.68	1.68	0.49	0.21	0.04	0.13	44.5	15.5	11.7	0.37	2.5
Exp123274	BBT	Fibroma	Female	43	6.15	4.34	130	0.386	88.9	30	337	264	0.57	0.354	0.062	0.011	0.003	3.5	2.18	0.38	0.07	0.02	0.12	38.6	12.3	10.5	0.3	2.8
Exp123688	BBT	Fibroma	Female	44	8.82	4.4	103	0.344	78.2	23.4	299	541	0.565	0.34	0.069	0.017	0.009	4.98	3	0.61	0.15	0.08	0.15	41.3	9.9	9.9	0.22	5.3
Exp123079	BBT	MBC	Female	43	9.76	4.3	95	0.315	73.3	22.1	302	331	0.802	0.112	0.084	0.001	0.001	7.83	1.09	0.82	0.01	0.01	0.19	49.9	14.8	11.4	0.39	3.8
Exp123155	BBT	MBC	Female	51
Exp123236	BBT	MBC	Female	65	3.89	4.02	92	0.299	74.4	22.9	308	393	0.725	0.141	0.116	0.013	0.005	2.82	0.55	0.45	0.05	0.02	0.19	50.3	9.1	9.2	0.19	3.6
Exp123264	BBT	MBC	Female	54	5.73	4.11	124	0.373	90.8	30.2	332	258	0.638	0.281	0.063	0.009	0.009	3.66	1.61	0.36	0.05	0.05	0.13	45.1	9	8.9	0.15	2.3
[truncated: 8 more columns]

## Sheet: Table S1B
Table S1B : Genes identified at protein level in discovery cohort.
	Exp122977	Exp122894	Exp122939	Exp122969	Exp122983	Exp122928	Exp122953	Exp122906	Exp123005	Exp122954	Exp122904	Exp123115	Exp122929	Exp122968	Exp122914	Exp122917	Exp122921	Exp122923	Exp122912	Exp122903	Exp122955	Exp122989	Exp122990	Exp122976	Exp122927	Exp122930	Exp122916	Exp122946	Exp122956	Exp122948	Exp122966	Exp122973	Exp122940	Exp122925	Exp122913	Exp122963	Exp122901	Exp122998	Exp122959	Exp122941	Exp122907	Exp122970	Exp122993	Exp122933	Exp122988	Exp122994	Exp123008	Exp122972	Exp123003
A1BG	107.515	135.287	155.413	147.793	120.866	125.057	132.571	109.729	149.03	139.245	133.304	126.019	126.807	124.117	164.603	182.554	159.539	173.418	159.123	149.937	191.424	105.382	129.885	110.123	128.451	104.936	116.499	136.333	96.8406	121.48	173.211	150.896	119.89	142.515	121.752	127.163	104.442	151.492	104.8	142.987	117.134	115.863	144.772	117.252	126.05	125.63	183.129	117.355	195.91
A1CF	1e-05	1e-05	1e-05	1e-05	1e-05	1e-05	1e-05	1e-05	1e-05	1e-05	1e-05	1e-05	1e-05	1e-05	1e-05	1e-05	1e-05	1e-05	1e-05	0.158988	1e-05	1e-05	1e-05	0.0361786	0.139004	1e-05	1e-05	1e-05	0.0503563	0.0693257	1e-05	1e-05	1e-05	1e-05	1e-05	1e-05	1e-05	1e-05	1e-05	1e-05	1e-05	0.0568556	1e-05	1e-05	1e-05	1e-05	1e-05	1e-05	1e-05
A2M	834.485	983.226	674.479	1244.43	790.895	677.145	965.313	673.932	680.415	1303.99	1293.85	1248.79	1033.66	910.152	1142.19	1424.03	947.28	736.841	782.737	932.273	609.879	797.756	1161.94	755.331	682.975	933.37	821.73	896.564	1267.4	1458.26	833.348	778.28	1081.76	904.683	842.941	696.11	1052.15	1105.26	932.599	1239.7	1152.68	866.63	808.962	1003.28	729.263	1057.38	1093.04	1025.96	1073.55
A2ML1	5.98336	5.80092	3.92046	4.46255	4.20562	3.1116	6.59047	3.99379	4.29807	1.74718	5.41834	3.53433	5.13015	4.82307	3.30135	0.0994788	3.96038	3.69187	4.09892	0.253947	0.0174527	2.9168	2.76452	3.80034	3.69899	3.80013	2.48079	2.11201	4.36717	4.68366	6.21231	2.7276	3.84774	2.78203	4.77026	3.79483	6.07428	3.17225	3.76015	6.18857	3.36699	4.44573	3.81842	3.25401	5.09879	3.28235	3.51852	5.66024	3.82927
A4GNT	1e-05	1e-05	1e-05	1e-05	1e-05	1e-05	1e-05	1e-05	1e-05	1e-05	1e-05	1e-05	1e-05	1e-05	1e-05	1e-05	1e-05	1e-05	1e-05	1e-05	1e-05	1e-05	1e-05	1e-05	1e-05	1e-05	1e-05	1e-05	1e-05	1e-05	1e-05	1e-05	1e-05	1e-05	1e-05	1e-05	1e-05	1e-05	1e-05	1e-05	1e-05	1e-05	1e-05	1e-05	1e-05	1e-05	1e-05	1e-05	1e-05
AAAS	1e-05	1e-05	1e-05	1e-05	1e-05	1e-05	1e-05	1e-05	1e-05	1e-05	1e-05	1e-05	1e-05	1e-05	1e-05	1e-05	1e-05	1e-05	1e-05	1e-05	1e-05	1e-05	1e-05	1e-05	0.0740821	1e-05	1e-05	1e-05	1e-05	1e-05	1e-05	1e-05	1e-05	1e-05	1e-05	1e-05	1e-05	1e-05	1e-05	1e-05	1e-05	0.0714762	1e-05	1e-05	1e-05	1e-05	1e-05	1e-05	1e-05
AACS	1e-05	1e-05	1e-05	1e-05	1e-05	1e-05	1e-05	1e-05	1e-05	1e-05	1e-05	1e-05	0.154414	1e-05	1e-05	1e-05	1e-05	1e-05	1e-05	1e-05	1e-05	1e-05	1e-05	1e-05	1e-05	1e-05	1e-05	1e-05	1e-05	1e-05	1e-05	1e-05	1e-05	1e-05	1e-05	1e-05	0.0438086	1e-05	1e-05	1e-05	1e-05	1e-05	1e-05	1e-05	1e-05	1e-05	1e-05	1e-05	1e-05
AADAC	1e-05	1e-05	1e-05	1e-05	1e-05	1e-05	1e-05	1e-05	1e-05	1e-05	1e-05	1e-05	1e-05	1e-05	1e-05	1e-05	1e-05	1e-05	1e-05	1e-05	1e-05	1e-05	1e-05	1e-05	1e-05	1e-05	1e-05	1e-05	1e-05	1e-05	1e-05	1e-05	1e-05	1e-05	1e-05	1e-05	1e-05	1e-05	1e-05	1e-05	1e-05	1e-05	1e-05	1e-05	1e-05	1e-05	1e-05	1e-05	1e-05
AADAT	1e-05	1e-05	1e-05	1e-05	1e-05	1e-05	1e-05	1e-05	1e-05	1e-05	1e-05	1e-05	1e-05	1e-05	1e-05	1e-05	1e-05	1e-05	1e-05	1e-05	1e-05	1e-05	1e-05	1e-05	1e-05	1e-05	1e-05	1e-05	1.13833	1e-05	1e-05	1e-05	1e-05	0.431718	1e-05	1e-05	1e-05	1e-05	1e-05	1e-05	1e-05	1e-05	1e-05	0.794877	1e-05	1e-05	1e-05	1e-05	1e-05
AAGAB	1e-05	1e-05	1e-05	1e-05	2.44971	1e-05	1e-05	1e-05	1e-05	1e-05	1e-05	1e-05	1e-05	1e-05	1e-05	1e-05	1e-05	1e-05	1e-05	1e-05	1e-05	1e-05	1e-05	1e-05	1e-05	1e-05	1e-05	1e-05	1e-05	1e-05	1e-05	1e-05	1e-05	1e-05	1e-05	1e-05	1e-05	1e-05	1e-05	1.64546	1e-05	1e-05	1e-05	1e-05	1e-05	1e-05	1e-05	1e-05	1e-05
AAK1	1e-05	0.110517	1e-05	0.113784	0.113215	1e-05	1e-05	1e-05	0.459809	1e-05	1e-05	0.0670579	0.380628	0.169039	1e-05	1e-05	1e-05	0.0202474	1e-05	0.144294	1e-05	1e-05	0.0931131	1e-05	1e-05	1e-05	0.0741357	1e-05	1e-05	1e-05	1e-05	1e-05	1e-05	1e-05	1e-05	1e-05	1e-05	1e-05	0.420995	0.305237	1e-05	1e-05	0.215989	1e-05	1e-05	1e-05	1e-05	1e-05	0.444898
AAMP	1e-05	1e-05	1e-05	1e-05	1e-05	1e-05	1e-05	1e-05	1e-05	1e-05	1e-05	1e-05	1e-05	1e-05	1e-05	0.698095	1e-05	1e-05	1e-05	1e-05	1e-05	1e-05	1e-05	1e-05	1e-05	1.05643	1e-05	1e-05	1e-05	1e-05	1e-05	1e-05	1e-05	1e-05	1e-05	1e-05	1e-05	1e-05	1e-05	1.14244	1e-05	1e-05	1e-05	1e-05	1e-05	1e-05	1e-05	1e-05	1e-05
AAR2	1e-05	1e-05	1e-05	0.460975	0.21542	1e-05	1e-05	1e-05	0.257203	1e-05	1e-05	1e-05	1e-05	0.218254	1e-05	1e-05	1e-05	1e-05	1e-05	0.619082	1e-05	1e-05	1e-05	1e-05	1e-05	1e-05	1e-05	1e-05	1e-05	1e-05	1e-05	1e-05	1e-05	1e-05	1e-05	1e-05	1e-05	1e-05	1e-05	1e-05	1e-05	1e-05	1e-05	1e-05	1e-05	1e-05	1e-05	1e-05	1e-05
AARS1	2.2596	2.54952	2.76675	2.65573	0.0438766	0.0512653	0.164271	2.46211	0.0428698	2.56695	2.91754	2.77789	0.0902352	0.275058	2.77399	0.0397285	2.88042	2.79442	0.0696942	3.35844	2.81914	2.55642	2.84351	0.0764147	2.75609	2.42879	2.58847	0.0636075	0.0253144	2.70796	2.73757	2.865	2.52944	2.42704	0.869754	2.51193	3.02486	0.052349	0.0123974	2.7388	0.468227	2.62712	2.8486	2.36968	2.38399	2.91661	0.0178143	2.62817	0.300537
AARS2	1e-05	1e-05	1e-05	1e-05	1e-05	1e-05	1e-05	3.55664	1e-05	1e-05	1e-05	1e-05	1e-05	1e-05	1e-05	1e-05	1e-05	1e-05	1e-05	1e-05	1e-05	1e-05	1e-05	1e-05	1e-05	1e-05	1e-05	1e-05	1e-05	1e-05	1e-05	1e-05	1e-05	1e-05	1e-05	1e-05	1e-05	1e-05	1e-05	1e-05	1e-05	1e-05	0.616828	1e-05	0.0683018	1e-05	1e-05	1e-05	1e-05
AARSD1	1e-05	1e-05	1e-05	1e-05	1e-05	1e-05	1e-05	1e-05	1e-05	1e-05	1e-05	1e-05	1e-05	1e-05	0.990649	1e-05	1e-05	1e-05	1e-05	1e-05	1e-05	1e-05	1e-05	1e-05	1e-05	1e-05	1e-05	1e-05	1e-05	0.403981	1e-05	1e-05	1e-05	1e-05	1e-05	1e-05	1e-05	1e-05	0.656525	1.33365	1e-05	1e-05	1e-05	1e-05	1e-05	0.0744672	1e-05	0.617464	1e-05
AASDHPPT	1e-05	1e-05	1e-05	1e-05	1e-05	1e-05	1e-05	1.09203	1e-05	1e-05	1e-05	1e-05	1e-05	1e-05	1.73053	1e-05	1e-05	1e-05	1e-05	1e-05	1e-05	1e-05	1e-05	1e-05	1e-05	1e-05	2.06497	1e-05	1e-05	1e-05	1e-05	1e-05	1e-05	1e-05	1e-05	1e-05	1e-05	1e-05	1e-05	1e-05	1e-05	1e-05	1e-05	1e-05	1e-05	1e-05	1e-05	1e-05	1e-05
AASS	1e-05	1e-05	1e-05	1e-05	1e-05	1e-05	1e-05	1e-05	1e-05	1e-05	1e-05	1e-05	1e-05	1e-05	1e-05	1e-05	1e-05	0.50247	1e-05	1e-05	1e-05	1e-05	1e-05	1e-05	1e-05	1e-05	1e-05	1e-05	1e-05	1e-05	1e-05	1e-05	1e-05	1e-05	1e-05	1e-05	1e-05	1e-05	1e-05	1e-05	0.830784	1e-05	1e-05	0.190155	1e-05	1e-05	1e-05	1e-05	1e-05
AATF	1e-05	1e-05	1e-05	1e-05	1e-05	1e-05	1e-05	1e-05	1e-05	1e-05	1e-05	1e-05	1e-05	1e-05	1e-05	1e-05	1e-05	1e-05	1e-05	1e-05	1e-05	1e-05	1e-05	1e-05	1e-05	1e-05	1e-05	1e-05	1e-05	1e-05	1e-05	1e-05	1e-05	1e-05	1e-05	1e-05	1e-05	1e-05	1e-05	1e-05	1e-05	1e-05	1e-05	1e-05	1e-05	1e-05	1e-05	1e-05	1e-05
ABAT	1e-05	0.22507	0.121251	1.96005	1e-05	1e-05	1e-05	1e-05	0.190167	1e-05	1e-05	1e-05	0.703687	1e-05	1e-05	1e-05	1e-05	1e-05	1e-05	1e-05	1e-05	0.26752	1e-05	1e-05	1.1752	1e-05	1e-05	1e-05	1e-05	1e-05	1e-05	0.143527	1e-05	1e-05	1e-05	1e-05	0.159236	1e-05	0.0793635	1e-05	1e-05	1e-05	1e-05	1e-05	1e-05	1e-05	1e-05	1e-05	1e-05
ABCA3	1e-05	1e-05	1e-05	1e-05	1e-05	0.354922	1e-05	1e-05	1e-05	0.201497	1e-05	1e-05	1e-05	1e-05	1e-05	1e-05	1e-05	1e-05	1e-05	1e-05	1e-05	1e-05	1e-05	1e-05	1e-05	1e-05	1e-05	1e-05	1e-05	1e-05	1e-05	1e-05	1e-05	1e-05	1e-05	1e-05	1e-05	1e-05	1e-05	1e-05	1e-05	1e-05	1e-05	1e-05	1e-05	1e-05	1e-05	1e-05	1e-05
ABCA6	1e-05	1e-05	1e-05	1e-05	1e-05	1e-05	0.209325	1e-05	1e-05	0.317808	1e-05	1e-05	1e-05	1e-05	1e-05	0.247785	1e-05	1e-05	1e-05	1e-05	1e-05	1e-05	1e-05	1e-05	1e-05	1e-05	1e-05	1e-05	1e-05	1e-05	1e-05	1e-05	1e-05	1e-05	1e-05	1e-05	1e-05	1e-05	1e-05	1e-05	1e-05	1e-05	1e-05	1e-05	1e-05	1e-05	1e-05	1e-05	0.729217
ABCA8	1e-05	1e-05	1e-05	1e-05	1e-05	1e-05	1e-05	0.318326	1e-05	1e-05	1e-05	1e-05	1e-05	1e-05	1e-05	1e-05	1e-05	1e-05	1e-05	1e-05	1e-05	1e-05	1e-05	1e-05	1e-05	1e-05	1e-05	1e-05	1e-05	1e-05	1e-05	1e-05	1e-05	1e-05	1e-05	1e-05	1e-05	1e-05	1e-05	1e-05	1e-05	1e-05	1e-05	1e-05	1e-05	1e-05	1e-05	1e-05	1e-05
ABCA9	1e-05	1e-05	1e-05	1e-05	1e-05	1e-05	1e-05	1e-05	1e-05	1e-05	1e-05	1e-05	1e-05	1e-05	1e-05	1e-05	1e-05	1e-05	1e-05	1e-05	1e-05	1e-05	1e-05	1e-05	1e-05	1e-05	1e-05	1e-05	1e-05	1e-05	1e-05	1e-05	1e-05	1e-05	1e-05	1e-05	1e-05	1e-05	1e-05	1e-05	1e-05	1e-05	1e-05	1e-05	1e-05	1e-05	1e-05	1e-05	1e-05
ABCB1	1e-05	1e-05	1e-05	1e-05	1e-05	1e-05	1e-05	1e-05	1e-05	1e-05	1e-05	1e-05	1e-05	1e-05	1e-05	1e-05	1e-05	1e-05	1e-05	1e-05	1e-05	1e-05	1e-05	1e-05	1e-05	1e-05	1e-05	1e-05	0.37026	1e-05	1e-05	1e-05	1e-05	1e-05	1e-05	1e-05	1e-05	1e-05	1e-05	1e-05	1e-05	1e-05	1e-05	1e-05	1e-05	0.0454353	1e-05	1e-05	1e-05
ABCB10	1e-05	1e-05	1e-05	1e-05	1e-05	1e-05	1e-05	1e-05	1e-05	1e-05	1e-05	1e-05	1e-05	1e-05	1e-05	1e-05	1e-05	1e-05	1e-05	1e-05	1e-05	1e-05	1e-05	1e-05	1e-05	1e-05	1e-05	1e-05	1e-05	1e-05	1e-05	1e-05	1e-05	1e-05	1e-05	1e-05	1e-05	1e-05	1e-05	1e-05	1e-05	1e-05	1e-05	1e-05	1e-05	1e-05	1e-05	1e-05	1e-05
ABCB11	1e-05	1e-05	1e-05	1e-05	1e-05	1e-05	0.441948	1e-05	1e-05	1e-05	1e-05	1e-05	1e-05	1e-05	1e-05	1e-05	1e-05	1e-05	0.34815	1e-05	1e-05	5.43481	1e-05	1e-05	0.0471939	0.101028	1e-05	1e-05	1e-05	1e-05	1e-05	1e-05	1e-05	1e-05	1e-05	1e-05	1e-05	1e-05	1e-05	0.0992743	1e-05	1e-05	1e-05	1e-05	1e-05	1e-05	1e-05	1e-05	1e-05
ABCB4	1e-05	1e-05	1e-05	1e-05	1e-05	1e-05	1e-05	1e-05	1e-05	1e-05	1e-05	1e-05	1e-05	1e-05	1e-05	1e-05	1e-05	1e-05	1e-05	1e-05	1e-05	1e-05	1e-05	1e-05	1e-05	1e-05	1e-05	1e-05	1e-05	1e-05	1e-05	1e-05	1e-05	1e-05	1e-05	1e-05	1e-05	1e-05	1e-05	1e-05	1e-05	1e-05	1e-05	1e-05	1e-05	1e-05	1e-05	1e-05	1e-05
ABCB6	1e-05	1e-05	1e-05	1e-05	1e-05	1e-05	1e-05	1e-05	1e-05	1e-05	1e-05	1e-05	1e-05	1e-05	1e-05	1e-05	1e-05	1e-05	1e-05	1e-05	1e-05	0.0423508	1e-05	1e-05	1e-05	1e-05	1e-05	1e-05	1e-05	1e-05	1e-05	1e-05	1e-05	1e-05	1e-05	1e-05	1e-05	1e-05	1e-05	1e-05	1e-05	0.166851	1e-05	1e-05	1e-05	1e-05	1e-05	1e-05	1e-05
ABCB7	1e-05	1e-05	1e-05	1e-05	1e-05	1e-05	1e-05	1e-05	1e-05	1e-05	1e-05	1e-05	1e-05	1e-05	1e-05	1e-05	1e-05	1e-05	1e-05	1e-05	1e-05	1e-05	1e-05	1e-05	1e-05	1e-05	1e-05	1e-05	1e-05	1e-05	1e-05	1e-05	1e-05	1e-05	1e-05	1e-05	1e-05	1e-05	1e-05	1e-05	1e-05	1e-05	1e-05	1e-05	0.454423	1e-05	1e-05	0.10557	1e-05
ABCB8	1e-05	1e-05	0.0502069	1e-05	1e-05	1e-05	1e-05	1e-05	1e-05	1e-05	1e-05	1e-05	1e-05	0.108892	1e-05	1e-05	1e-05	1e-05	1e-05	1e-05	1e-05	1e-05	1e-05	1e-05	1e-05	1e-05	1e-05	1e-05	1e-05	1e-05	1e-05	1e-05	1e-05	1e-05	1e-05	1e-05	1e-05	1e-05	1e-05	1e-05	1e-05	1e-05	1e-05	1e-05	1e-05	1e-05	1e-05	1e-05	1e-05
ABCC1	1e-05	1e-05	1e-05	1e-05	1e-05	1e-05	1e-05	1e-05	1e-05	1e-05	1e-05	1e-05	1e-05	1e-05	1e-05	1e-05	1e-05	1e-05	1e-05	1e-05	1e-05	1e-05	1e-05	1e-05	1e-05	1e-05	1e-05	0.0490515	1e-05	1e-05	1e-05	1e-05	1e-05	1e-05	1e-05	1e-05	1e-05	1e-05	1e-05	1e-05	1e-05	1e-05	1e-05	1e-05	0.0194588	1e-05	1e-05	1e-05	1e-05
ABCC2	0.325456	0.171606	0.239024	0.38269	0.255946	0.46037	0.282576	0.527149	0.330661	0.410302	0.217074	0.209831	0.278624	0.371847	0.25324	0.259875	0.230544	0.523682	0.766275	0.122649	0.482297	1.12029	0.150831	0.392501	0.70315	0.498653	0.31146	0.27101	0.366047	0.489797	0.46473	0.118156	0.13778	0.149667	0.284259	0.336235	0.385206	0.0787809	0.247023	0.514217	0.213311	0.809537	0.264112	0.206026	0.284709	0.144637	0.270759	0.364664	0.232693
ABCC3	1e-05	1e-05	1e-05	1e-05	1e-05	1e-05	1e-05	1e-05	1e-05	1e-05	1e-05	1e-05	1e-05	0.153713	1e-05	1e-05	1e-05	1e-05	1e-05	1e-05	1e-05	1e-05	1e-05	1e-05	1e-05	1e-05	0.158849	1e-05	0.0248186	1e-05	1e-05	1e-05	1e-05	1e-05	1e-05	1e-05	1e-05	1e-05	1e-05	1e-05	0.10653	1e-05	1e-05	0.0249782	1e-05	1e-05	1e-05	1e-05	1e-05
ABCC4	1e-05	1e-05	1e-05	1e-05	1e-05	1e-05	1e-05	1e-05	1e-05	1e-05	1e-05	1e-05	1e-05	1e-05	1e-05	1e-05	1e-05	1e-05	1e-05	1e-05	1e-05	1e-05	1e-05	1e-05	1e-05	1e-05	1e-05	1e-05	1e-05	1e-05	1e-05	1e-05	1e-05	1e-05	1e-05	0.0635716	1e-05	1e-05	1e-05	1e-05	1e-05	1e-05	1e-05	0.0316573	1e-05	1e-05	1e-05	1e-05	1e-05
ABCC5	1e-05	1e-05	1e-05	1e-05	1e-05	1e-05	1e-05	1e-05	1e-05	1e-05	1e-05	1e-05	1e-05	1e-05	1e-05	1e-05	1e-05	1e-05	1e-05	1e-05	1e-05	1e-05	1e-05	1e-05	1e-05	1e-05	1e-05	1e-05	1e-05	1e-05	1e-05	1e-05	1e-05	1e-05	1e-05	1e-05	1e-05	1e-05	1e-05	1e-05	1e-05	1e-05	1e-05	1e-05	1e-05	1e-05	1e-05	1e-05	1e-05
ABCD1	1e-05	1e-05	1e-05	1e-05	1e-05	1e-05	1e-05	1e-05	0.0771731	1e-05	1e-05	1e-05	1e-05	1e-05	1e-05	1e-05	1e-05	1e-05	1e-05	1e-05	1e-05	1e-05	1e-05	1e-05	1e-05	1e-05	1e-05	1e-05	1e-05	1e-05	1e-05	1e-05	1e-05	1e-05	1e-05	1e-05	1e-05	1e-05	1e-05	1e-05	1e-05	1e-05	1e-05	1e-05	1e-05	1e-05	1e-05	1e-05	1e-05
ABCD3	2.2596	0.287305	0.525501	0.141873	2.58907	2.66382	2.68614	2.46211	2.16367	2.56695	0.404267	2.77789	2.71377	1.77832	1.88344	2.61719	0.120555	1.0591	2.58955	3.35844	2.81914	2.55642	2.84351	2.27011	2.75609	2.42879	2.58847	2.65759	0.341293	2.70796	2.32652	3.13956	2.52944	2.42704	2.97561	2.51193	0.066081	0.553246	1.58504	1.07055	1.81242	2.62712	1.22802	2.36968	2.38399	2.91661	2.77519	2.18057	1.11338
ABCE1	1.16903	0.864423	1.47216	0.300193	0.624237	1.24646	0.754937	0.59545	1.04723	0.914867	1.82448	1.58911	0.664717	0.386175	0.446288	0.658896	0.597354	0.776314	0.390817	2.32467	12.4523	0.433701	1.4001	0.749501	0.842713	1.76049	0.778947	2.07368	0.0257784	0.919488	0.818279	11.8219	9.75134	0.933058	25.5331	1.1753	1.15995	0.589097	0.30105	0.0308296	1.68553	0.594909	1.09837	1.13999	0.432967	1.2467	1.15487	14.1095	0.36209
ABCF1	1e-05	1e-05	1e-05	1e-05	1e-05	1e-05	1e-05	1e-05	1e-05	1e-05	1e-05	1e-05	1e-05	1e-05	0.186537	1e-05	0.0552704	1e-05	1e-05	1e-05	1e-05	1e-05	0.10235	1e-05	1e-05	1e-05	1e-05	1e-05	1e-05	1e-05	1e-05	1e-05	1e-05	1e-05	1e-05	1e-05	1e-05	1e-05	1e-05	1e-05	1e-05	1e-05	1e-05	1e-05	1e-05	1e-05	1e-05	1e-05	1e-05
ABCF2	1e-05	0.0750282	0.191899	1e-05	1e-05	1e-05	1e-05	1e-05	1e-05	1e-05	1e-05	1e-05	0.0502986	1e-05	1e-05	1e-05	1e-05	1e-05	1e-05	0.63701	1e-05	1e-05	1e-05	0.00991277	1e-05	1e-05	1e-05	1e-05	1e-05	1e-05	1e-05	1e-05	1e-05	1e-05	1e-05	1e-05	1e-05	1e-05	1e-05	1e-05	1e-05	1e-05	0.100754	0.037293	1e-05	1e-05	1e-05	1e-05	1e-05
ABCF3	0.652542	0.0433744	2.76675	0.676108	0.333162	2.66382	0.0425535	0.0456585	2.63341	0.925623	0.0611555	2.77789	2.71377	0.0469222	2.77399	2.61719	0.164664	2.79442	2.58955	3.35844	2.81914	0.972048	2.84351	0.926853	2.75609	2.42879	1.44338	2.65759	0.844546	2.70796	2.73757	2.865	2.52944	0.0265905	2.97561	0.722906	3.02486	2.71306	0.0678709	2.7388	2.39571	2.62712	2.8486	2.36968	0.0462181	2.91661	2.77519	2.62817	2.94865
ABCG8	1e-05	1e-05	1e-05	1e-05	1e-05	1e-05	1e-05	1e-05	1e-05	1e-05	1e-05	1e-05	1e-05	1e-05	1e-05	1e-05	1e-05	1e-05	1e-05	1e-05	1e-05	1e-05	1e-05	1e-05	1e-05	1e-05	1e-05	1e-05	1e-05	1e-05	1e-05	1e-05	1e-05	1e-05	1e-05	1e-05	1e-05	1e-05	1e-05	1e-05	1e-05	1e-05	1e-05	1e-05	1e-05	1e-05	1e-05	1e-05	1e-05
ABHD10	1e-05	1e-05	1e-05	3.46709	1e-05	1e-05	1e-05	1e-05	1e-05	1e-05	1e-05	1e-05	1e-05	0.427602	1e-05	1e-05	1e-05	1e-05	1e-05	0.314479	1e-05	1e-05	2.14874	1e-05	1e-05	1e-05	1e-05	1e-05	1e-05	1e-05	1e-05	1e-05	1e-05	1e-05	1e-05	1e-05	0.44424	1e-05	1e-05	1e-05	0.229853	1e-05	1e-05	1e-05	1e-05	1e-05	1e-05	1e-05	0.340685
ABHD11	0.850669	0.815375	1.04327	0.749648	0.128667	1.02742	2.44767	1.14274	0.893479	0.413233	1.50429	1.4985	3.71361	0.920401	0.706594	0.24177	0.105283	0.829275	1.34883	1.37708	1.16686	0.899313	1.10053	2.25877	2.11439	1.05259	0.68997	1.51038	1.58484	1.99026	1.29514	1.28483	0.0196704	1.59503	1.53946	1.03965	1.11359	0.939452	1.00441	1.85146	0.908298	0.637529	1.51862	0.577057	0.972896	1.58193	1.10351	1.29992	1.35124
ABHD12	0.30109	1.0233	1e-05	1e-05	1e-05	1e-05	1e-05	1e-05	1e-05	0.21889	1e-05	1e-05	1e-05	0.130181	1e-05	1e-05	1e-05	1e-05	1e-05	1e-05	1e-05	0.455553	1e-05	0.416222	1e-05	0.188587	1e-05	1e-05	1e-05	1e-05	1e-05	1e-05	1e-05	1e-05	1e-05	1e-05	1e-05	1e-05	1e-05	1e-05	1e-05	1e-05	1e-05	1e-05	1e-05	1e-05	0.147335	0.105912	0.262673
ABHD14B	1e-05	1e-05	20.1755	1e-05	1e-05	0.0632889	6.51994	1e-05	1e-05	1e-05	1e-05	1e-05	1e-05	0.669843	0.426294	0.891132	6.7935	1e-05	1e-05	1e-05	1e-05	22.3812	1e-05	1e-05	1e-05	1e-05	7.33893	1e-05	1e-05	1e-05	19.0943	1e-05	1e-05	1e-05	1e-05	1e-05	1e-05	1e-05	1e-05	1e-05	0.546751	1e-05	1e-05	1e-05	1.43614	2.33752	3.07441	1e-05	1e-05
ABHD16A	1e-05	1e-05	0.0741274	1e-05	1e-05	1e-05	0.120288	1e-05	1e-05	1e-05	1e-05	1e-05	0.521174	1e-05	1e-05	1e-05	1e-05	1e-05	1e-05	1e-05	1e-05	1e-05	0.952922	1e-05	1e-05	1e-05	1e-05	1e-05	1e-05	5.49862	2.42871	1e-05	1e-05	1e-05	2.54964	1e-05	1e-05	1e-05	1e-05	0.299912	1.74886	0.837511	1e-05	1.51706	1e-05	1e-05	1e-05	1e-05	1e-05
ABHD17C	1e-05	1e-05	1e-05	1e-05	1e-05	1e-05	1e-05	1e-05	1e-05	1e-05	1e-05	1e-05	1e-05	1e-05	1e-05	1e-05	1e-05	1e-05	1e-05	1e-05	1e-05	1e-05	1e-05	1e-05	1e-05	1e-05	1e-05	1e-05	1e-05	1e-05	1e-05	1e-05	1e-05	1e-05	1e-05	1e-05	1e-05	1e-05	1e-05	1e-05	1e-05	1e-05	1e-05	1e-05	1e-05	1e-05	0.36878	1e-05	1e-05
ABHD2	1e-05	1e-05	1e-05	1e-05	1e-05	1e-05	1e-05	1e-05	1e-05	1e-05	1e-05	1e-05	1e-05	1e-05	1e-05	1e-05	1e-05	1e-05	1e-05	1e-05	1e-05	1e-05	1e-05	1e-05	1e-05	1e-05	1e-05	1e-05	1e-05	1e-05	1e-05	1e-05	1e-05	1e-05	1e-05	1e-05	1e-05	1e-05	1e-05	1e-05	1e-05	1e-05	1e-05	1e-05	1e-05	1e-05	1e-05	1e-05	1e-05
ABHD4	1e-05	1e-05	1e-05	1e-05	1e-05	1e-05	1e-05	1e-05	1e-05	1e-05	1e-05	1e-05	1e-05	1e-05	1e-05	1e-05	1e-05	1e-05	1e-05	1e-05	1e-05	1e-05	1e-05	1e-05	1e-05	1e-05	1e-05	1e-05	1e-05	1e-05	1e-05	1e-05	1e-05	1e-05	1e-05	1e-05	1e-05	1e-05	1e-05	1e-05	1e-05	1e-05	1e-05	1e-05	1e-05	1e-05	1e-05	1e-05	1e-05
ABHD6	1e-05	1e-05	1e-05	1e-05	1e-05	1e-05	1e-05	1e-05	1e-05	1e-05	1e-05	1e-05	1e-05	1e-05	1e-05	1e-05	1e-05	1e-05	1e-05	1e-05	1e-05	1e-05	1e-05	1e-05	1e-05	0.125316	1e-05	1e-05	1e-05	1e-05	1e-05	1e-05	1e-05	1e-05	1e-05	1e-05	1e-05	1e-05	1e-05	0.540848	1e-05	1e-05	1e-05	1e-05	1e-05	1e-05	1e-05	0.332866	1e-05
ABI1	1e-05	1e-05	1e-05	1e-05	1e-05	1e-05	1e-05	1e-05	1e-05	1e-05	1e-05	1e-05	1e-05	1e-05	1e-05	1e-05	1e-05	1e-05	1e-05	1e-05	1e-05	1e-05	0.096069	1e-05	1e-05	1.64108	1e-05	1e-05	1e-05	1e-05	1e-05	1e-05	1e-05	0.408533	1e-05	0.24634	1e-05	1e-05	1e-05	1e-05	1e-05	1e-05	1e-05	1e-05	1e-05	1e-05	1e-05	1e-05	1e-05
ABI2	1e-05	1e-05	1e-05	1e-05	1e-05	1e-05	1e-05	1e-05	1e-05	1e-05	1e-05	1e-05	1e-05	1e-05	1e-05	1e-05	1e-05	1e-05	1e-05	1e-05	1e-05	1e-05	1e-05	1e-05	1e-05	1e-05	1e-05	1e-05	1e-05	1e-05	1e-05	1e-05	1e-05	1e-05	1e-05	1e-05	1e-05	1e-05	1e-05	1e-05	1e-05	1e-05	1e-05	1e-05	1e-05	1e-05	1e-05	1e-05	1e-05
ABI3	1e-05	1.5356	1e-05	1e-05	1e-05	1e-05	1e-05	1e-05	1e-05	1e-05	1e-05	1e-05	1e-05	1e-05	1e-05	1e-05	1e-05	1e-05	1e-05	1e-05	1e-05	1e-05	1e-05	1e-05	1e-05	1e-05	1e-05	1e-05	1e-05	1e-05	1e-05	1e-05	1e-05	1e-05	1e-05	1e-05	1e-05	1e-05	1e-05	1e-05	1e-05	1e-05	1e-05	1e-05	1e-05	1e-05	1e-05	1e-05	1e-05
ABI3BP	0.525332	0.916761	1.10554	0.660339	0.31648	0.133412	0.0865048	0.645227	0.483488	0.807818	0.68809	0.847163	0.158282	0.985136	0.201437	0.187683	0.71415	0.708957	0.629904	1.30849	0.721343	0.580601	1.68766	0.455413	0.136153	0.031168	1.39477	1.11322	1.06528	0.257914	1.11688	0.223097	1.74492	0.672353	0.802055	1.39823	0.619882	0.649409	0.563182	0.722801	1.05605	0.802668	0.619012	0.155625	0.698235	1.39962	0.0376951	1.44659	2.01545
ABL2	1e-05	1e-05	1e-05	1e-05	1e-05	1e-05	1e-05	1e-05	1e-05	1e-05	1e-05	1e-05	1e-05	1e-05	1e-05	1e-05	1e-05	1e-05	1e-05	1e-05	1e-05	1e-05	1e-05	1e-05	1e-05	1e-05	1e-05	1e-05	1e-05	1e-05	1e-05	0.630495	1e-05	1e-05	1e-05	1e-05	1e-05	1e-05	1e-05	1e-05	1e-05	1e-05	1e-05	1e-05	1e-05	1e-05	1e-05	1e-05	0.398039
ABLIM1	1e-05	1e-05	0.0371016	1e-05	1e-05	1e-05	1e-05	1e-05	1e-05	1e-05	1e-05	1e-05	1e-05	1e-05	1e-05	1e-05	1e-05	1e-05	1e-05	1e-05	1e-05	1e-05	0.0451246	1e-05	1e-05	1e-05	1e-05	1e-05	1e-05	1e-05	1e-05	1e-05	1e-05	1e-05	1e-05	0.0646884	1e-05	1e-05	0.183118	0.0952983	1e-05	1e-05	1e-05	1e-05	1e-05	1e-05	1e-05	1e-05	1e-05
ABLIM2	1e-05	1e-05	1e-05	1e-05	1e-05	1e-05	1e-05	1e-05	1e-05	1e-05	1e-05	1e-05	0.0452779	1e-05	1e-05	1e-05	1e-05	1e-05	1e-05	1e-05	1e-05	1e-05	1e-05	1e-05	1e-05	1e-05	1e-05	1e-05	1e-05	1e-05	1e-05	1e-05	1e-05	1e-05	1e-05	1e-05	1e-05	1e-05	1e-05	1e-05	1e-05	1e-05	1e-05	1e-05	1e-05	1e-05	1e-05	1e-05	1e-05
ABLIM3	1e-05	1e-05	1e-05	1e-05	1e-05	0.127978	1e-05	1e-05	1e-05	1e-05	1e-05	1e-05	1e-05	1e-05	1e-05	1e-05	1e-05	1e-05	1e-05	1e-05	1e-05	1e-05	1e-05	1e-05	1e-05	1e-05	1e-05	1e-05	1e-05	1e-05	1e-05	1e-05	1e-05	1e-05	1e-05	0.088704	1e-05	1e-05	1e-05	1e-05	1e-05	1e-05	1e-05	1e-05	1e-05	1e-05	1e-05	1e-05	1e-05
ABO	1e-05	1e-05	1e-05	1e-05	1e-05	1e-05	1e-05	1e-05	1e-05	1e-05	1e-05	1e-05	1e-05	1e-05	1e-05	1e-05	1e-05	1e-05	1e-05	1e-05	1e-05	1e-05	1e-05	1e-05	1e-05	1e-05	1e-05	1e-05	1e-05	1e-05	1e-05	1e-05	1e-05	1e-05	1e-05	1e-05	1e-05	1e-05	1e-05	1e-05	1e-05	1e-05	1e-05	1e-05	1e-05	1e-05	1e-05	1e-05	1e-05
ABR	2.2596	2.54952	2.76675	0.279524	2.58907	0.103754	2.68614	0.378138	2.63341	2.56695	0.181216	2.77789	0.0802928	0.0815348	0.344423	2.61719	2.88042	0.169814	0.124475	3.35844	2.81914	2.55642	2.84351	0.111315	2.75609	0.181736	0.33846	2.65759	0.341019	2.70796	0.248447	0.202526	0.226495	2.42704	1.35689	0.188645	3.02486	2.71306	2.51576	2.7388	2.39571	2.62712	2.8486	2.36968	0.125677	2.91661	0.151138	2.62817	2.94865
ABRACL	9.75236	1e-05	13.2073	1e-05	1e-05	1e-05	1e-05	1e-05	1e-05	1e-05	10.7625	1e-05	1e-05	1e-05	1e-05	1e-05	14.5232	1e-05	1e-05	1e-05	1e-05	7.93932	1e-05	1e-05	1e-05	1e-05	1e-05	1e-05	1e-05	10.0468	1e-05	1e-05	1e-05	1e-05	1e-05	10.3177	1e-05	1e-05	1e-05	1e-05	1e-05	7.01823	1e-05	8.74481	1e-05	1e-05	8.87416	1e-05	1e-05
ABRAXAS2	1e-05	1e-05	1e-05	1e-05	1e-05	1e-05	1e-05	1e-05	1e-05	1e-05	1e-05	1e-05	1e-05	1e-05	1e-05	1e-05	1e-05	1e-05	1e-05	1e-05	1e-05	1e-05	1e-05	1e-05	1e-05	1e-05	1e-05	1e-05	1e-05	1e-05	1e-05	1e-05	1e-05	1e-05	1e-05	1e-05	1e-05	1e-05	1e-05	1e-05	1e-05	1e-05	1e-05	1e-05	1e-05	1e-05	1e-05	1e-05	1e-05
ABT1	1e-05	1e-05	1e-05	1e-05	1e-05	1e-05	1e-05	1e-05	1e-05	1e-05	1e-05	1e-05	1e-05	1e-05	1e-05	1e-05	1e-05	1e-05	1e-05	1e-05	1e-05	1e-05	1e-05	1e-05	1e-05	1e-05	1e-05	1e-05	1e-05	1e-05	1e-05	1e-05	1e-05	1e-05	1e-05	1e-05	1e-05	1e-05	1e-05	1e-05	1e-05	1e-05	1e-05	1e-05	1e-05	1e-05	1e-05	0.443126	1e-05
ABTB2	1e-05	1e-05	1e-05	1e-05	1e-05	1e-05	1e-05	1e-05	1e-05	1e-05	1e-05	1e-05	1e-05	1e-05	0.276132	1e-05	1e-05	1e-05	1e-05	1e-05	1e-05	1e-05	1e-05	1e-05	1e-05	1e-05	1e-05	1e-05	1e-05	1e-05	1e-05	1e-05	1e-05	1e-05	1e-05	1e-05	1e-05	1e-05	1e-05	1e-05	1e-05	1e-05	1e-05	1e-05	1e-05	1e-05	1e-05	1e-05	1e-05
ACAA1	0.131922	1e-05	0.796051	1e-05	1e-05	1e-05	1e-05	1e-05	1e-05	0.0438519	1e-05	0.535664	1e-05	1e-05	1e-05	1e-05	1e-05	1e-05	1e-05	1e-05	1e-05	0.0779091	1e-05	1e-05	1e-05	0.631473	1e-05	1e-05	1e-05	1e-05	1e-05	1e-05	0.0695646	0.0891634	1e-05	1e-05	1e-05	1e-05	1e-05	0.951592	1e-05	1e-05	0.485934	1e-05	1e-05	1e-05	1e-05	1e-05	1e-05
ACAA2	0.800691	12.581	7.75305	3.469	5.14034	4.30407	3.93029	1.61742	2.80951	3.14482	2.14702	1.98592	5.85853	3.68285	3.0965	4.78859	3.81318	4.13284	3.68017	23.3735	6.24729	5.50173	3.64531	7.17955	2.274	2.48433	3.37327	17.2951	3.87624	1.82912	0.187231	2.80517	3.12711	0.997479	18.0062	2.78097	15.8851	8.98416	3.62407	5.07469	4.77312	2.68312	1.6617	2.03361	11.6972	2.36488	2.46495	4.90877	2.76637
ACACA	0.299942	0.29628	0.35544	0.35752	0.330958	0.382283	0.382921	0.369986	0.369045	0.307921	0.214962	0.172849	0.337427	0.403832	0.34794	0.412326	0.382056	0.388155	0.43389	0.432361	0.378908	0.49012	0.19772	0.312815	0.373226	0.18018	0.37844	0.315828	0.346172	0.327894	0.420376	0.661739	0.37113	0.409625	0.267964	0.266412	0.430738	0.303266	0.373873	0.458451	0.253298	0.268728	0.228793	0.301555	0.40284	0.247838	0.177878	0.336785	0.225528
ACACB	0.28379	0.284349	0.341127	0.343123	0.299931	0.312797	0.339401	0.281356	0.225686	0.295521	0.206306	0.165889	0.31701	0.284496	0.333929	0.395722	0.366671	0.372524	0.271974	0.400177	0.307824	0.432713	0.189759	0.300218	0.300941	0.172924	0.264955	0.297859	0.259027	0.31469	0.31311	0.263259	0.287664	0.302893	0.257174	0.255684	0.314718	0.291054	0.358818	0.439989	0.22942	0.257907	0.167144	0.195787	0.386618	0.237858	0.170715	0.323223	0.216446
ACAD10	0.0839065	2.54952	0.0315114	2.65573	0.137022	2.66382	0.104611	2.46211	2.63341	2.56695	2.91754	2.77789	2.71377	2.55032	2.77399	2.61719	2.88042	2.79442	2.58955	3.35844	2.81914	0.179194	2.84351	2.27011	2.75609	2.42879	2.58847	0.0704927	0.221868	0.0858765	0.243486	2.865	0.182274	2.42704	2.97561	0.164419	3.02486	2.71306	2.51576	0.133391	2.39571	2.62712	2.8486	2.36968	2.38399	0.478194	2.77519	0.136927	0.66868
ACAD11	1e-05	1e-05	1e-05	1e-05	1e-05	1e-05	1e-05	1e-05	1e-05	1e-05	1e-05	1e-05	1e-05	1e-05	1e-05	1e-05	1e-05	1e-05	1e-05	1e-05	1e-05	1e-05	1e-05	1e-05	1e-05	1e-05	1e-05	1e-05	1e-05	1e-05	1e-05	1e-05	1e-05	1e-05	1e-05	1e-05	1e-05	1e-05	1e-05	1e-05	1e-05	1e-05	1e-05	1e-05	1e-05	1e-05	1e-05	0.371937	1e-05
ACAD8	0.321595	2.54952	2.76675	1.51671	1.84871	2.66382	2.15729	2.46211	2.63341	2.56695	1.9821	0.587817	2.71377	1.52858	2.77399	2.61719	2.88042	2.79442	2.58955	3.35844	2.81914	2.55642	2.84351	2.27011	2.75609	2.42879	2.58847	2.65759	1.6844	2.70796	2.09666	0.132634	2.52944	2.42704	2.97561	2.26522	3.02486	2.71306	0.648046	1.60879	0.377679	3.69292	2.8486	2.36968	2.38399	0.133634	2.77519	2.62817	0.67596
ACAD9	1e-05	1e-05	1e-05	1e-05	1e-05	1e-05	1e-05	1e-05	1e-05	1e-05	1e-05	0.484864	0.498085	0.374634	1e-05	0.253307	1e-05	1e-05	0.355242	0.034688	1e-05	0.0605509	1e-05	0.685355	0.506482	1e-05	1e-05	1e-05	1e-05	1e-05	1e-05	0.290737	1e-05	1e-05	1e-05	0.0710119	1e-05	1e-05	1e-05	1e-05	1e-05	0.260393	1e-05	1e-05	1e-05	0.308527	1e-05	1e-05	1e-05
ACADL	1e-05	1e-05	1e-05	1e-05	1e-05	1e-05	1e-05	1e-05	1e-05	1e-05	1e-05	1e-05	1e-05	1e-05	1e-05	1e-05	1e-05	1e-05	1e-05	1e-05	1e-05	1e-05	1e-05	1e-05	1e-05	1e-05	1e-05	1e-05	1e-05	0.210446	1e-05	1e-05	1e-05	1e-05	1e-05	1e-05	1e-05	1e-05	1e-05	1e-05	1e-05	1e-05	1e-05	1e-05	1e-05	1e-05	1e-05	0.330755	1e-05
ACADM	1e-05	1e-05	1e-05	1e-05	1e-05	1e-05	1e-05	0.350038	1e-05	1e-05	1e-05	1e-05	1e-05	1e-05	0.46281	1e-05	1e-05	0.17955	1e-05	1e-05	1e-05	1e-05	1e-05	1e-05	1e-05	1e-05	1e-05	1e-05	1e-05	0.259029	1e-05	1e-05	1e-05	1e-05	1e-05	1e-05	1e-05	1e-05	1e-05	1e-05	1e-05	0.130824	1e-05	1e-05	1.04804	1e-05	1e-05	1e-05	1e-05
ACADS	1e-05	1e-05	1e-05	0.953799	1e-05	1e-05	1e-05	0.920149	1e-05	1e-05	1e-05	1e-05	1e-05	1e-05	1e-05	1.01944	1e-05	1e-05	1e-05	1e-05	1e-05	1.29691	1.54873	1e-05	1e-05	1e-05	1e-05	0.741802	1e-05	1e-05	1e-05	1e-05	1e-05	1e-05	1e-05	1e-05	1e-05	1e-05	1e-05	1e-05	1e-05	1e-05	0.549628	1e-05	1e-05	1e-05	2.57444	1.11387	1e-05
ACADSB	1e-05	1e-05	1e-05	1e-05	1e-05	1e-05	1e-05	1e-05	1e-05	1e-05	1e-05	1e-05	1e-05	1e-05	0.380748	1e-05	1e-05	1e-05	1e-05	1e-05	0.756747	0.776158	0.666243	0.481817	1e-05	1e-05	1e-05	1e-05	1e-05	1e-05	1e-05	1e-05	1e-05	1e-05	1e-05	0.3892	1e-05	1e-05	0.810971	1e-05	1e-05	1e-05	1e-05	1e-05	1e-05	0.378569	1e-05	1e-05	1e-05
ACADVL	2.2596	2.54952	2.76675	0.0210619	2.58907	2.66382	0.0379416	2.46211	2.63341	2.56695	2.91754	2.77789	0.122873	2.55032	2.77399	2.61719	2.88042	2.79442	0.0521969	0.697259	2.81914	2.55642	2.84351	0.0421243	2.75609	0.0440414	0.348074	2.65759	2.741	0.0686295	0.579885	2.865	0.095836	2.42704	0.0676354	2.51193	0.917775	2.71306	2.51576	0.0416416	2.39571	0.0415521	2.8486	2.36968	0.0970374	0.0696231	2.77519	2.62817	2.94865
ACAN	2.2596	8.35398	2.76675	0.0232263	2.58907	5.5888	2.68614	6.40418	4.34266	2.56695	2.91754	5.41667	2.71377	2.55032	0.10441	5.61358	2.88042	2.6165	2.58955	0.428019	1.50426	2.55642	2.84351	2.27011	0.171226	5.12291	0.229275	2.20383	2.741	2.70796	0.0476075	2.865	1.93876	0.479596	0.133195	15.1243	0.0616013	0.0730987	2.51576	0.123644	2.39571	2.62712	2.8486	2.36968	2.38399	2.91661	4.01369	3.19807	2.94865
ACAP1	1e-05	0.604612	1e-05	0.545005	1e-05	1e-05	1e-05	1e-05	1e-05	1e-05	1e-05	1e-05	1e-05	1e-05	1e-05	1e-05	1e-05	1e-05	1e-05	1e-05	1e-05	1e-05	1e-05	1e-05	0.77268	1e-05	1e-05	0.591257	1e-05	1e-05	1e-05	1e-05	1e-05	1e-05	1e-05	1e-05	1e-05	1e-05	1e-05	1e-05	1e-05	1e-05	1e-05	1e-05	1e-05	1e-05	1e-05	1e-05	1e-05
ACAP2	1e-05	1e-05	1e-05	1e-05	1e-05	1e-05	1e-05	1e-05	1e-05	1e-05	1e-05	1e-05	1e-05	1e-05	1e-05	1e-05	1e-05	1e-05	1e-05	1e-05	1e-05	1e-05	1e-05	1e-05	1e-05	1e-05	1e-05	1e-05	1e-05	1e-05	1e-05	1e-05	1e-05	1e-05	1e-05	1e-05	1e-05	1e-05	1e-05	1e-05	1e-05	1e-05	1e-05	1e-05	1e-05	1e-05	1e-05	1e-05	1e-05
ACAT1	1e-05	1e-05	1e-05	1.50877	1e-05	1e-05	1e-05	1e-05	1.05904	1e-05	1.68706	0.0775938	1e-05	1e-05	1e-05	0.926555	1e-05	1e-05	1e-05	1e-05	1e-05	1e-05	1e-05	1e-05	1.16158	1e-05	1e-05	1e-05	0.907485	0.787154	1e-05	1e-05	1e-05	1e-05	1e-05	1e-05	1e-05	0.574507	1e-05	0.416627	0.653103	1e-05	1e-05	1e-05	1e-05	1e-05	4.07735	1e-05	1e-05
ACAT2	1e-05	1e-05	0.110296	0.0557376	1e-05	1e-05	0.0677136	1e-05	0.0633601	1e-05	1e-05	1e-05	1e-05	1e-05	1e-05	1e-05	1e-05	1e-05	1e-05	1e-05	1e-05	1e-05	0.0599298	1e-05	1e-05	1e-05	0.518743	1e-05	1e-05	0.0696922	1.07357	1e-05	1e-05	1e-05	0.0628388	0.189029	0.0583378	1e-05	1e-05	0.0753939	1e-05	0.050512	1e-05	1e-05	1e-05	0.0810137	1e-05	1e-05	0.083319
ACBD3	1e-05	1e-05	0.550634	1e-05	1e-05	1e-05	1e-05	1e-05	1e-05	1e-05	1e-05	1e-05	1e-05	1e-05	1e-05	1e-05	1e-05	1e-05	1e-05	1e-05	1e-05	1e-05	1e-05	1e-05	0.612354	1e-05	1e-05	1e-05	1e-05	0.0666166	1e-05	1e-05	1e-05	1e-05	1e-05	1e-05	1e-05	1e-05	1e-05	1e-05	1e-05	1e-05	1e-05	1e-05	1e-05	1e-05	1e-05	1e-05	1e-05
ACBD4	1e-05	1e-05	1e-05	1e-05	1e-05	1e-05	0.217782	1e-05	1e-05	1e-05	1e-05	1e-05	1e-05	1e-05	1e-05	1e-05	1e-05	1e-05	1e-05	1e-05	1e-05	1e-05	1e-05	1e-05	1e-05	1e-05	1e-05	1e-05	0.578772	1e-05	1e-05	1e-05	1e-05	1e-05	2.7438	1e-05	1e-05	1e-05	1e-05	1e-05	1e-05	1e-05	0.0152254	1e-05	1e-05	1e-05	0.0443657	1e-05	1e-05
ACBD5	1e-05	1e-05	0.357592	1e-05	1e-05	1e-05	0.0952797	1e-05	1e-05	1e-05	1e-05	1e-05	1e-05	1e-05	1e-05	1e-05	1e-05	1e-05	1e-05	1e-05	1e-05	1e-05	1e-05	1e-05	1e-05	1e-05	1e-05	1e-05	0.253213	1e-05	1e-05	1e-05	0.259066	1e-05	1e-05	1e-05	1e-05	1e-05	1e-05	1e-05	1e-05	1e-05	0.0066611	1e-05	1e-05	1e-05	0.01941	1e-05	1e-05
ACBD6	1e-05	1e-05	1e-05	1e-05	1e-05	1e-05	1e-05	1e-05	1e-05	1e-05	1e-05	1e-05	1e-05	1e-05	1e-05	1e-05	1e-05	1e-05	1e-05	1e-05	1e-05	1e-05	1e-05	1e-05	1e-05	1e-05	1e-05	1e-05	1e-05	1e-05	1e-05	1e-05	1e-05	1e-05	1e-05	1e-05	1e-05	1e-05	1e-05	1e-05	1e-05	1e-05	1e-05	1e-05	1e-05	1e-05	1e-05	1e-05	1e-05
ACE	0.12389	0.841563	0.218572	0.167019	0.178117	0.368394	0.182276	0.60432	0.399452	0.199822	0.754426	0.473029	0.124301	0.337284	0.69953	0.138339	0.120747	0.698253	0.193297	1.85406	0.178751	0.176574	1.21613	0.0719724	0.203043	0.169783	0.125411	0.679548	0.688679	0.158575	0.556708	0.158999	0.820214	0.192894	0.282159	0.413301	0.743696	0.224754	0.142252	1.06963	0.303052	0.495636	0.706263	0.195351	0.173282	0.879641	0.559188	1.12532	0.197615
ACE2	0.716963	1.58563	3.05007	2.60126	0.0848186	2.38534	2.06728	1.70041	0.845402	3.08052	2.02549	2.10932	0.497238	1.0437	1.98535	2.01818	2.3197	3.47884	1.31284	1.93921	2.4297	0.139684	1.02428	1.0989	1.89749	1.08601	1.05975	0.12856	3.24226	1.64913	2.62643	0.852791	1.66019	0.815597	2.00571	1.16373	3.80073	2.3059	2.02525	0.981388	1.5283	0.809104	0.919263	1.11589	3.82049	2.32685	0.523081	1.80903	2.80138
ACHE	1e-05	1e-05	1e-05	1e-05	1e-05	4.3427	1e-05	1e-05	1e-05	1e-05	1e-05	1e-05	1e-05	1e-05	2.26831	1e-05	1e-05	1e-05	1e-05	1e-05	1e-05	1e-05	1e-05	1e-05	1e-05	1e-05	1e-05	1e-05	1e-05	1e-05	1e-05	1e-05	1e-05	1e-05	1e-05	1e-05	1e-05	1e-05	1e-05	1e-05	1e-05	1e-05	1e-05	1e-05	1e-05	1e-05	1e-05	1e-05	1e-05
ACIN1	0.613997	0.828061	1.40233	1.06538	0.973004	1.38899	0.65082	0.85837	1.40787	0.842304	1.23535	1.49972	0.915714	0.254366	1.62462	1.3711	1.26413	1.2886	0.913906	1.80745	0.896815	0.259353	0.953634	0.51214	1.9048	0.689992	1.03405	0.498909	1.45428	0.833752	1.04563	1.46034	0.621501	0.909013	1.0312	1.16349	1.76058	0.843838	1.28154	0.954172	0.177596	0.890319	0.130698	0.379552	1.77135	2.09667	1.37218	0.812745	1.06468
ACLY	1.30142	4.94156	7.53351	0.98441	1.344	0.672554	18.9935	8.651	0.740095	20.0731	0.403606	0.97754	1.36494	0.432129	3.08554	2.50311	0.2996	1.75401	1.73766	0.220755	2.02511	2.2103	0.618976	0.0536915	0.996244	0.0700727	11.0904	0.0427313	21.1811	5.35532	1.68812	2.77324	1.27239	0.125102	7.98763	1.74546	1.86301	0.314788	0.0105323	22.0883	1.19011	1.51132	0.0840546	0.929461	0.0555257	0.250803	1.09172	17.0335	0.106676
ACO1	2.2596	0.115726	0.401087	0.038497	2.58907	2.66382	2.68614	2.46211	0.135277	2.56695	0.416989	2.77789	0.193495	0.0119775	0.145322	0.0923413	2.88042	2.79442	2.58955	0.240661	0.389767	2.55642	2.84351	2.27011	2.75609	2.42879	2.58847	0.278401	2.741	2.70796	2.73757	2.865	0.0980431	2.42704	2.97561	2.51193	3.02486	0.146984	0.41093	2.7388	2.39571	2.62712	2.8486	2.36968	0.382609	0.860455	2.77519	0.0898855	2.94865
ACO2	0.0192754	0.715382	0.308814	0.758138	0.358363	0.149179	0.302152	0.544561	0.527099	0.139858	0.584952	0.46146	0.928387	0.38044	0.35092	0.829532	0.663127	0.445293	0.56356	0.97822	0.572286	0.612647	1.86614	0.41187	0.124993	0.653354	0.235733	0.65238	0.518411	0.45502	0.774291	0.668725	0.507014	0.0291429	0.0855428	0.169039	0.608498	0.83485	0.872823	0.758742	0.0961962	0.289796	0.425064	0.424365	0.415996	0.64604	0.238531	0.848726	0.470526
ACOT1	1e-05	1e-05	1e-05	1e-05	1e-05	1e-05	1e-05	0.0991147	0.840377	1e-05	1e-05	1e-05	1e-05	1e-05	1e-05	0.0351778	1e-05	1e-05	1e-05	1e-05	7.38206	1e-05	1e-05	1e-05	1e-05	1e-05	1e-05	1e-05	1e-05	0.282157	1e-05	1e-05	1e-05	1e-05	1e-05	6.77116	1e-05	1e-05	1.25021	1e-05	1e-05	0.129592	0.164694	1e-05	1e-05	0.0710594	1e-05	1e-05	1e-05
ACOT11	1e-05	1e-05	1e-05	1e-05	1e-05	1e-05	1e-05	1e-05	1e-05	1e-05	1e-05	1e-05	1e-05	1e-05	1e-05	0.119791	1e-05	1e-05	1e-05	1e-05	1e-05	1e-05	1e-05	1e-05	1e-05	1e-05	1e-05	1e-05	1e-05	1e-05	1e-05	1e-05	1e-05	1e-05	1e-05	1e-05	1e-05	1e-05	1e-05	1e-05	1e-05	1e-05	1e-05	1e-05	1e-05	1e-05	1e-05	1e-05	1e-05
ACOT13	1e-05	1e-05	1e-05	1e-05	1e-05	1e-05	1e-05	1e-05	1e-05	1e-05	1e-05	3.58725	1e-05	1e-05	1e-05	1e-05	1e-05	1e-05	1e-05	1e-05	5.2828	1e-05	1e-05	1e-05	1e-05	1e-05	1e-05	1e-05	1e-05	1e-05	1e-05	1e-05	1e-05	1e-05	1e-05	1e-05	1e-05	1e-05	1e-05	1e-05	1e-05	1e-05	1e-05	1e-05	6.37637	1e-05	1e-05	1e-05	1e-05
ACOT2	1e-05	1e-05	1e-05	1e-05	1e-05	1e-05	1e-05	0.0805307	0.682807	1e-05	0.126549	1e-05	1e-05	1e-05	1e-05	0.028582	1e-05	1e-05	0.129082	1e-05	5.99793	1e-05	1e-05	1e-05	1e-05	1e-05	1e-05	1e-05	1e-05	0.229253	1e-05	1e-05	1e-05	1e-05	1e-05	5.50156	1e-05	1e-05	1.0158	1e-05	1e-05	0.105294	0.133814	1e-05	1e-05	0.0577358	1e-05	1e-05	1e-05
ACOT4	1e-05	1e-05	1e-05	1e-05	1e-05	1e-05	1e-05	1e-05	1e-05	1e-05	1e-05	1e-05	1e-05	1e-05	1e-05	1e-05	1e-05	1e-05	1e-05	1e-05	1e-05	1e-05	1e-05	1e-05	1e-05	1e-05	1e-05	1e-05	1e-05	1e-05	1e-05	1e-05	1e-05	1e-05	1e-05	1e-05	1e-05	1e-05	1e-05	1e-05	1e-05	1e-05	1e-05	1e-05	1e-05	1e-05	1e-05	1e-05	1e-05
ACOT7	1e-05	1e-05	1e-05	1e-05	1e-05	1e-05	1e-05	1e-05	1e-05	1e-05	1e-05	1e-05	1e-05	1e-05	1e-05	1e-05	1e-05	1e-05	1e-05	1e-05	1e-05	1e-05	1e-05	1e-05	1e-05	8.23787	1e-05	1e-05	1e-05	1e-05	1e-05	1e-05	1e-05	1e-05	1e-05	1e-05	1e-05	1e-05	1e-05	1e-05	1e-05	1e-05	1e-05	1e-05	1e-05	1e-05	1e-05	1e-05	1e-05
ACOT8	1e-05	1e-05	1e-05	1e-05	0.0272319	0.0910039	1e-05	1e-05	1e-05	1e-05	1e-05	1e-05	1e-05	1e-05	1e-05	0.0827031	1e-05	1e-05	1e-05	1e-05	0.0409672	1e-05	1e-05	1e-05	1e-05	1e-05	1e-05	1e-05	1e-05	1e-05	1e-05	1e-05	1e-05	0.0558708	1e-05	0.0744942	1e-05	0.146383	0.0774196	1e-05	1e-05	1e-05	1e-05	1e-05	0.116326	1e-05	1e-05	1e-05	1e-05
ACOT9	0.322673	0.181142	0.279404	0.327184	0.367768	0.323852	0.243164	0.204607	0.214731	0.327471	0.287012	0.393338	0.329993	0.174709	0.352333	0.33134	0.186318	0.430946	0.0907206	0.272529	0.339779	0.217282	0.404347	0.235588	0.280516	0.174569	0.191781	0.32686	0.324503	0.259335	0.105687	0.220249	0.312779	0.176601	0.204151	0.253391	0.137298	0.2171	0.199664	0.325903	0.13262	0.299832	0.243872	0.14598	0.177439	0.464399	0.312439	0.13074	0.453698
ACOX1	2.2596	2.54952	0.0821519	0.52728	2.58907	2.66382	2.68614	2.46211	0.416202	0.312422	2.91754	2.77789	2.71377	2.55032	2.77399	0.0513658	2.88042	0.0566146	0.486936	3.35844	0.738281	0.563415	2.84351	1.3139	1.23842	2.42879	2.58847	0.598149	2.741	2.70796	2.73757	2.865	2.52944	2.35452	2.97561	2.51193	0.151299	2.71306	0.0590419	1.41223	0.245666	2.62712	2.8486	2.02809	2.38399	2.91661	0.0643908	2.62817	1.46331
ACOX2	1e-05	1e-05	1e-05	1e-05	1e-05	1e-05	1e-05	1e-05	1e-05	1e-05	1e-05	1e-05	1e-05	1e-05	1e-05	1e-05	1e-05	1e-05	1e-05	1e-05	1e-05	0.519537	1e-05	0.521657	1e-05	1e-05	1e-05	1e-05	1e-05	1e-05	1e-05	1e-05	1e-05	1e-05	1e-05	1e-05	1e-05	0.383606	0.479415	1e-05	1e-05	1e-05	1e-05	1e-05	1e-05	1e-05	1e-05	1e-05	1e-05
ACOX3	0.636372	0.7671	0.684758	0.580452	0.399238	0.721003	0.51656	0.276978	0.400836	0.4735	0.572549	0.426864	0.353478	0.393519	0.58059	0.486887	0.375862	0.548811	0.815548	0.295679	0.408395	0.641553	0.490756	0.474542	0.431264	0.459326	0.319651	0.399428	0.448218	0.586783	0.465875	0.35479	0.11717	0.418571	0.310167	1.09492	0.374616	0.860007	0.972798	0.797608	1.81762	0.605025	0.600188	0.329201	0.386403	0.496907	0.428178	0.507344	0.773763
ACP1	2.2596	2.54952	4.03525	2.65573	2.58907	2.66382	6.28737	2.46211	2.63341	2.56695	2.91754	0.383151	3.51259	0.227268	2.77399	2.61719	2.88042	2.79442	2.58955	3.35844	2.81914	0.38493	0.385681	0.281933	2.75609	2.42879	2.58847	2.65759	2.741	2.70796	2.73757	2.865	2.52944	2.42704	0.4098	2.51193	3.02486	2.71306	2.51576	2.7388	2.39571	1.16542	2.8486	2.36968	0.44372	2.91661	0.268497	0.524612	0.753993
ACP2	1e-05	1e-05	1e-05	1e-05	1e-05	1e-05	1e-05	1e-05	1e-05	1e-05	1e-05	1e-05	1e-05	1e-05	1e-05	1e-05	1e-05	1e-05	1e-05	1e-05	1e-05	1e-05	1e-05	1e-05	0.788782	1e-05	1e-05	1e-05	1e-05	1e-05	1e-05	1e-05	0.985632	1e-05	1e-05	1e-05	1e-05	1e-05	1e-05	1e-05	1e-05	1e-05	1e-05	1e-05	1e-05	1e-05	1e-05	1e-05	1e-05
ACP3	1e-05	1e-05	0.208454	1e-05	1e-05	1e-05	1e-05	1.82487	1e-05	1e-05	1e-05	1e-05	1e-05	1e-05	1e-05	1e-05	1e-05	1e-05	1e-05	1e-05	1e-05	2.73501	1e-05	1e-05	1e-05	1e-05	1e-05	1e-05	1e-05	1e-05	1e-05	1e-05	1e-05	1e-05	1e-05	1e-05	1e-05	1e-05	1e-05	1e-05	4.14058	0.565514	0.585621	1e-05	1e-05	1e-05	1.17492	1e-05	1e-05
ACP5	1e-05	1e-05	1e-05	1e-05	1e-05	1e-05	1e-05	1e-05	1e-05	1e-05	1e-05	1e-05	1e-05	1e-05	1e-05	1e-05	1e-05	1e-05	1.91278	1e-05	1e-05	1e-05	1e-05	1e-05	1e-05	1e-05	1e-05	1e-05	1e-05	0.235478	1e-05	1e-05	1e-05	1e-05	1e-05	1e-05	1e-05	1e-05	1e-05	1e-05	1e-05	1e-05	1e-05	1e-05	1e-05	1e-05	1e-05	0.190518	1e-05
ACR	0.0439314	0.150673	0.127332	0.0912233	0.0658003	0.123101	0.0941064	0.0746667	0.164886	0.098074	0.118022	0.0365738	0.179132	0.0907648	0.122351	0.102376	0.0960958	0.0752818	0.151358	0.144025	0.161467	0.12264	0.0774339	0.102611	0.131849	0.135158	0.124336	0.139466	0.044193	0.067021	0.126555	0.177886	0.152974	0.0890366	0.124093	0.0745858	0.157144	0.11645	0.0990589	0.101469	0.0715884	0.148581	0.108443	0.138822	0.123958	0.0493236	0.0752277	0.071558	0.0612969
ACSBG1	1e-05	1e-05	1e-05	1e-05	1e-05	1e-05	1e-05	1e-05	1e-05	1e-05	1e-05	1e-05	1e-05	1e-05	1e-05	1e-05	1e-05	1e-05	1e-05	1e-05	1e-05	1e-05	1e-05	1e-05	1e-05	1e-05	1e-05	1e-05	1e-05	1e-05	1e-05	1e-05	1e-05	1e-05	1e-05	1e-05	1e-05	1e-05	1e-05	1e-05	1e-05	1e-05	1e-05	1e-05	1e-05	1e-05	1e-05	1e-05	1e-05
ACSF2	1e-05	1e-05	1e-05	1e-05	1e-05	1e-05	1e-05	1e-05	1e-05	1e-05	1e-05	0.0712425	1e-05	1e-05	1e-05	1e-05	1e-05	1e-05	1e-05	1e-05	1e-05	1e-05	1e-05	1e-05	1e-05	1e-05	0.235418	1e-05	1e-05	1e-05	1e-05	1e-05	1e-05	1e-05	1e-05	1e-05	1e-05	1e-05	1e-05	1e-05	1e-05	1e-05	1e-05	1e-05	1e-05	1e-05	1e-05	1e-05	1e-05
ACSF3	1e-05	1e-05	1e-05	1e-05	1e-05	1e-05	1e-05	1e-05	1e-05	1e-05	1e-05	1e-05	1e-05	1e-05	1e-05	1e-05	1e-05	1e-05	1e-05	1e-05	1e-05	1e-05	1e-05	1e-05	1e-05	1e-05	1e-05	1e-05	1e-05	1e-05	1e-05	1e-05	1e-05	1e-05	1e-05	1e-05	1e-05	1e-05	1e-05	1e-05	1e-05	1e-05	1e-05	1e-05	1e-05	1e-05	1e-05	1e-05	1e-05
ACSL1	1e-05	1e-05	1e-05	1e-05	1e-05	1e-05	1e-05	1e-05	0.012575	1.32045	1e-05	0.294626	1e-05	1e-05	1e-05	1.98448	1e-05	1e-05	1e-05	1e-05	1.51291	0.748721	1e-05	1e-05	1e-05	1e-05	1e-05	1.14746	1e-05	1e-05	0.864789	1.9645	1.68029	1e-05	1e-05	1e-05	1e-05	1e-05	1.18587	1e-05	1e-05	1e-05	1e-05	1e-05	1e-05	1.46566	0.320039	1e-05	1.33238
ACSL3	0.192601	0.0583484	0.655357	0.18674	0.419365	0.264077	0.0639904	0.222088	0.228909	0.239856	0.202322	0.152285	0.72619	0.368197	0.135875	0.194204	0.0741108	0.892189	0.0540414	0.276762	0.165751	0.0676474	0.463031	0.190424	0.0942041	0.110781	0.16383	0.0782969	0.165256	0.316881	3.35434	0.0774289	0.200754	0.284384	0.235905	0.26109	0.188902	0.0759169	0.171358	0.201686	0.0756507	0.310382	0.203865	0.238202	0.283098	0.107581	0.347384	0.159181	0.237411
ACSL4	1e-05	1e-05	1e-05	1e-05	1e-05	1e-05	1e-05	1e-05	1e-05	1e-05	1e-05	1e-05	1e-05	1e-05	1e-05	4.16663	1e-05	0.164896	1e-05	1e-05	1e-05	1e-05	1e-05	1e-05	1e-05	1e-05	1e-05	1.26994	1e-05	1e-05	1e-05	1e-05	1e-05	0.158588	1e-05	1e-05	1e-05	8.5521	1e-05	1e-05	1e-05	1e-05	1e-05	0.124778	1e-05	1e-05	0.0397552	0.374658	1e-05
ACSL5	1e-05	0.211416	1e-05	1.96573	1e-05	1e-05	1e-05	0.124013	1.99928	1e-05	1e-05	1e-05	1e-05	1e-05	1e-05	1e-05	1e-05	1e-05	1e-05	2.05813	1e-05	1e-05	1e-05	1.21819	1e-05	1e-05	1e-05	1e-05	1e-05	1e-05	1e-05	1e-05	1e-05	1e-05	1e-05	1e-05	0.855726	0.163357	0.0784085	2.20605	0.123762	1e-05	1e-05	0.208336	1e-05	1e-05	1e-05	1e-05	1e-05
ACSL6	1e-05	1e-05	1e-05	1e-05	1e-05	1e-05	1e-05	1e-05	1e-05	1e-05	1e-05	1e-05	1e-05	1e-05	1e-05	1e-05	1e-05	1e-05	1e-05	1e-05	1e-05	1e-05	1e-05	1e-05	1e-05	1e-05	1e-05	1e-05	1e-05	1e-05	1e-05	1e-05	1e-05	1e-05	1e-05	1e-05	1e-05	0.147799	0.070941	1e-05	0.111975	1e-05	1e-05	1e-05	1e-05	1e-05	1e-05	1e-05	1e-05
ACSM2A	1e-05	1e-05	1e-05	1e-05	1e-05	1e-05	1e-05	1e-05	1e-05	1e-05	1e-05	1e-05	1e-05	1e-05	1e-05	1e-05	0.250839	1e-05	1e-05	1e-05	1e-05	1e-05	1e-05	1e-05	1e-05	1e-05	1e-05	1e-05	1e-05	1e-05	1e-05	1e-05	1e-05	1e-05	1e-05	1e-05	0.0469915	1e-05	1e-05	1e-05	1e-05	1e-05	1e-05	1e-05	1e-05	1e-05	1e-05	1e-05	1e-05
ACSM2B	0.0411718	0.0761386	1e-05	1e-05	1e-05	1e-05	1e-05	1e-05	1e-05	0.0231515	1e-05	1e-05	1e-05	1e-05	1e-05	0.08547	0.383447	0.0518787	0.0866146	1e-05	1e-05	0.04138	1e-05	1e-05	1e-05	1e-05	1e-05	0.056253	1e-05	0.0468612	1e-05	1e-05	1e-05	1e-05	1e-05	1e-05	0.0457215	0.0891053	1e-05	1e-05	1e-05	1e-05	1e-05	1e-05	1e-05	1e-05	1e-05	1e-05	1e-05
ACSM3	1e-05	1e-05	1e-05	1e-05	1e-05	1e-05	1e-05	1e-05	1e-05	1e-05	1e-05	1e-05	1e-05	1e-05	1e-05	1e-05	1e-05	1e-05	1e-05	1e-05	1e-05	1e-05	1e-05	1e-05	1e-05	1e-05	1e-05	1e-05	1e-05	1e-05	1e-05	1e-05	1e-05	1e-05	1e-05	1e-05	1e-05	1e-05	1e-05	1e-05	1e-05	1e-05	1e-05	1e-05	1e-05	1e-05	1e-05	1e-05	1e-05
ACSM5	1e-05	1e-05	1e-05	1e-05	1e-05	1e-05	1e-05	1e-05	1e-05	1e-05	1e-05	1e-05	1e-05	1e-05	1e-05	1e-05	1e-05	1e-05	1e-05	1e-05	1e-05	1e-05	1e-05	1e-05	1e-05	1e-05	1e-05	1e-05	1e-05	1e-05	1e-05	1e-05	1e-05	1e-05	1e-05	1e-05	1e-05	1e-05	1e-05	1e-05	1e-05	1e-05	1e-05	1e-05	1e-05	1e-05	1e-05	1e-05	1e-05
ACSS1	1e-05	0.114515	1e-05	1e-05	1e-05	1e-05	1e-05	1e-05	1e-05	1e-05	1e-05	0.148519	1e-05	1e-05	1e-05	1e-05	0.0463424	1e-05	1e-05	0.366744	1e-05	1e-05	1e-05	0.0541369	1e-05	1e-05	0.202823	1e-05	1e-05	1e-05	1e-05	1e-05	1e-05	1e-05	1e-05	1e-05	0.137071	1e-05	1e-05	0.0947436	1e-05	1e-05	1e-05	1e-05	1e-05	1e-05	0.105844	1e-05	1e-05
ACSS2	1e-05	1e-05	1e-05	1e-05	1e-05	1e-05	1e-05	1e-05	1e-05	1e-05	1e-05	31.1731	32.8371	1e-05	1e-05	1e-05	1e-05	1e-05	1e-05	1e-05	1e-05	1e-05	1e-05	1e-05	1e-05	1e-05	1e-05	1e-05	1e-05	1e-05	1e-05	1e-05	1e-05	1e-05	1e-05	1e-05	1e-05	1e-05	1e-05	1e-05	1e-05	1e-05	1e-05	1e-05	1e-05	1e-05	1e-05	1e-05	1e-05
ACSS3	1e-05	1e-05	1e-05	1e-05	1e-05	1e-05	1e-05	1e-05	0.222416	1e-05	1e-05	1e-05	1e-05	1e-05	1e-05	1e-05	1e-05	1e-05	1e-05	1e-05	0.112182	1e-05	1e-05	1e-05	1e-05	1e-05	1e-05	0.12592	1e-05	1e-05	1e-05	1e-05	1e-05	1e-05	1e-05	1e-05	1e-05	1e-05	1e-05	1e-05	1e-05	1e-05	1e-05	1e-05	1e-05	1e-05	1e-05	1e-05	1e-05
ACTA1	3.86492	1.84327	4.11981	3.83637	2.25671	3.34047	6.83185	5.20839	4.1859	4.06617	3.83545	5.91394	5.52776	5.21711	6.47749	5.47371	4.43221	2.78382	2.33429	7.67096	4.07253	2.79096	3.32637	1.33252	2.67883	1.87497	2.38936	4.57679	8.9184	5.09028	4.86716	3.48603	1.9361	2.26354	2.66705	3.48199	4.86748	3.19211	4.31614	3.0163	3.5562	4.81181	5.06382	3.15216	4.18282	4.671	3.72755	2.64901	3.70575
ACTA2	4.13289	2.3718	4.48643	3.63883	2.97821	3.68524	4.27925	5.53557	4.04894	4.29554	4.42845	5.41302	6.21854	4.23902	4.53605	5.62177	5.07502	3.30139	2.86425	6.31589	3.5169	3.25586	3.01933	1.64187	2.67804	2.11996	2.80018	10.3366	9.14713	4.94433	5.4152	3.59572	1.75139	2.28082	3.3994	3.52823	5.58653	3.49245	4.40208	3.32877	3.62477	5.30543	4.93125	3.54428	4.12727	4.83744	3.41029	3.04787	5.82522
ACTB	7.40691	5.15813	9.0692	6.63537	5.14336	9.18026	8.77322	9.88848	9.64526	7.63745	8.55319	9.82783	8.81398	8.2599	8.45511	9.65138	8.76283	8.20152	4.87544	8.46268	8.9062	5.6767	5.52313	3.6192	8.2018	6.60155	5.24903	6.45892	12.5498	7.8836	6.88706	7.25784	5.13773	4.28245	4.75824	5.0152	9.99136	6.91911	8.06342	6.27509	6.05645	7.8514	7.40004	6.04632	7.50675	8.22066	8.0871	5.03952	7.93671
ACTBL2	3.01249	1.82965	5.99446	2.73292	2.23474	2.5755	5.1105	7.43109	4.75707	3.89599	5.33223	5.76031	7.95234	3.83659	5.03527	7.19731	5.24769	5.26763	2.96779	5.69204	4.69265	4.81862	4.644	3.03465	2.553	4.10629	2.45044	4.88418	5.11123	4.92765	3.7186	3.02517	2.46818	3.85112	4.43934	4.70774	9.57868	4.4582	2.43638	3.11946	2.76731	4.30721	5.38091	2.90166	6.02488	2.4416	3.49769	4.57173	4.68572
ACTC1	4.45758	2.3881	4.50743	3.98482	2.98991	4.10105	4.64353	5.55588	4.73051	4.65541	4.44217	5.91394	6.23976	4.26051	5.0162	6.13315	5.09488	3.31431	3.13793	6.33659	3.55542	3.25586	3.04659	1.64187	3.0737	2.13139	2.80018	4.87403	9.30213	5.4193	5.42268	3.59572	2.19351	2.65445	3.56021	3.75647	5.59584	3.49245	4.91553	3.32877	3.98576	5.32006	5.56684	3.55136	4.64389	5.28678	3.72755	3.06014	4.06979
ACTG1	7.40691	5.15813	9.0692	6.63537	5.14336	9.18026	8.77322	9.88848	9.64526	7.63745	8.55319	9.82783	8.81398	8.2599	8.45511	9.65138	8.76283	8.20152	4.87544	8.46268	8.9062	5.6767	5.52313	3.6192	8.2018	6.60155	5.24903	6.45892	12.5498	7.8836	6.88706	7.25784	5.13773	4.28245	4.75824	5.0152	9.99136	6.91911	8.06342	6.27509	6.05645	7.8514	7.40004	6.04632	7.50675	8.22066	8.0871	5.03952	7.93671
ACTG2	4.32075	2.47961	4.69035	3.80424	3.11359	3.85275	4.47377	5.78719	4.23299	4.4908	4.62974	5.65907	6.5012	4.43171	4.74224	5.87731	5.3057	3.45145	2.99444	5.62136	3.67676	3.40385	3.15657	1.7165	2.79977	2.21633	2.92746	10.8065	9.56291	5.16907	5.66134	3.75916	1.831	2.38449	3.55392	3.6886	5.84047	3.6512	4.60218	3.48008	3.78953	5.54659	5.1554	3.70538	4.31488	5.05733	3.5653	3.18641	6.09
ACTL6A	1e-05	1e-05	1e-05	3.48472	1e-05	1e-05	1e-05	1e-05	1e-05	0.17476	1e-05	1e-05	0.327038	1e-05	1e-05	1e-05	1e-05	1e-05	1e-05	1e-05	1e-05	1e-05	0.181052	1e-05	1e-05	1e-05	1e-05	1e-05	1e-05	1e-05	1e-05	1e-05	1e-05	1e-05	1.22869	1e-05	1e-05	1e-05	1e-05	1e-05	0.122433	1e-05	1e-05	1e-05	1e-05	1e-05	1e-05	1e-05	1e-05
ACTL6B	1e-05	1e-05	1e-05	3.38906	1e-05	1e-05	1e-05	1e-05	1e-05	1e-05	1e-05	1e-05	1e-05	1e-05	1e-05	1e-05	1e-05	1e-05	1e-05	1e-05	1e-05	1e-05	1e-05	1e-05	1e-05	1e-05	1e-05	1e-05	1e-05	1e-05	1e-05	1e-05	1e-05	1e-05	1.22869	1e-05	1e-05	1e-05	1e-05	1e-05	1e-05	1e-05	1e-05	1e-05	1e-05	1e-05	1e-05	1e-05	1e-05
ACTN1	0.771693	2.64978	1.32948	3.09211	0.626097	2.48823	2.58773	1.75643	1.79042	1.35247	2.39591	0.585158	3.28687	1.84445	3.90563	1.95123	1.16273	0.0478551	2.09171	1.25442	1.30446	0.15664	3.31677	1.44163	0.672267	0.493115	2.54991	0.787676	0.717666	1.8711	1.05544	1.73528	1.11597	1.45507	2.42388	2.75173	3.62802	2.60075	1.68606	2.97582	0.537856	2.34087	2.73848	1.56296	2.2625	0.787027	0.755154	2.65118	2.30836
ACTN2	2.2596	2.54952	2.76675	2.65573	0.0279922	2.66382	2.68614	2.46211	2.63341	2.56695	2.91754	2.77789	0.11471	0.204266	2.77399	2.61719	0.0359651	0.0327753	2.58955	3.35844	2.81914	0.0422683	2.84351	2.27011	2.75609	0.0318546	0.26703	0.0247236	0.0118634	0.0143153	2.73757	2.865	0.353085	0.112933	0.112067	0.0136028	3.02486	2.71306	2.51576	0.0235206	2.39571	2.62712	2.8486	0.0260005	0.0259159	0.0399959	0.0815506	2.62817	0.0174129
ACTN3	2.2596	2.54952	2.76675	2.65573	2.58907	2.66382	2.68614	2.46211	2.63341	2.56695	2.91754	2.77789	0.112917	0.179979	2.77399	2.61719	0.0354031	0.0322631	2.58955	3.35844	2.81914	0.0416078	2.84351	2.27011	2.75609	0.0313569	0.140783	0.0243373	0.0172113	0.0140916	2.73757	2.865	0.0204998	0.111169	0.110316	0.0133902	3.02486	2.71306	2.51576	0.0231531	2.39571	2.62712	2.8486	0.0255942	0.025511	0.039371	0.0802764	2.62817	0.0171408
ACTN4	1.08524	2.2613	1.35174	0.461094	0.502396	0.275206	0.216854	2.91988	0.311441	0.595489	0.165152	0.702246	1.62101	0.423506	0.469419	1.28074	0.841538	0.415278	0.576286	1.21899	1.18949	0.636592	0.232671	0.268724	0.736318	0.386064	1.726	0.55886	0.203595	0.904069	0.844505	1.50354	0.42885	0.841647	0.850786	0.4566	0.686315	0.554094	0.65863	0.680055	1.11347	0.668726	1.64896	0.724334	0.640114	0.966786	0.576196	0.341914	1.26061
ACTR10	1e-05	1e-05	1e-05	1e-05	1e-05	1e-05	1e-05	1e-05	1e-05	1e-05	1e-05	1e-05	1e-05	1e-05	1e-05	1e-05	1e-05	1e-05	1e-05	1e-05	1.11706	1e-05	1e-05	1e-05	1e-05	1e-05	1e-05	1e-05	1e-05	1e-05	1e-05	1e-05	1e-05	1.10829	1e-05	1e-05	1e-05	0.496782	1e-05	1e-05	0.0648622	1e-05	1e-05	0.902902	1e-05	1e-05	1e-05	1e-05	1e-05
ACTR1A	0.420951	0.473762	0.66974	0.644122	0.63277	0.847091	0.922761	0.385174	0.402404	0.903632	0.712121	1.98856	1.1683	0.712543	0.693327	0.0625572	0.119562	0.583596	0.394282	1.02948	0.300447	0.621859	0.910813	0.0604435	0.648998	0.620244	0.719378	1.48414	0.128644	0.695851	0.628752	1.13272	0.401689	0.899582	0.866535	0.526455	0.750366	0.824661	0.339443	0.34304	0.724062	0.632382	1.13924	0.62424	0.650147	0.0892475	0.76111	0.653282	0.505391
ACTR1B	53.0338	44.4042	101.709	0.822941	3.92745	101.057	121.863	95.0235	66.7514	97.1763	160.467	65.5962	87.7738	3.18042	2.56595	40.3144	138.71	64.978	108.944	33.4327	55.4687	87.0524	62.8965	85.6667	69.0351	15.7671	5.22614	98.1515	92.7824	95.3325	1.06714	97.2497	80.9257	96.6988	113.397	65.3131	174.678	118.022	125.62	107.902	86.3073	77.5141	90.1306	98.8095	74.1637	69.7082	48.0823	87.6732	67.0339
ACTR2	0.148414	0.250653	2.76675	2.65573	1.53372	0.425641	2.68614	42.3215	0.696354	2.56695	1.07855	0.562494	2.71377	2.55032	2.77399	2.61719	2.88042	0.555339	2.58955	3.35844	2.81914	2.55642	0.0918959	2.27011	0.286499	0.335842	2.58847	2.65759	2.741	2.70796	0.133859	2.865	2.52944	18.374	2.97561	0.618854	3.02486	2.71306	0.181082	0.284417	2.39571	0.285199	2.8486	1.32846	2.38399	0.16093	2.77519	2.62817	2.94865
ACTR3	0.0609825	0.276997	0.0269097	0.312583	0.0492022	0.142108	0.0679244	0.0593883	0.14645	0.0531657	0.0395533	0.0358641	0.0578503	0.0560439	0.0344839	0.0353494	0.0592868	0.558672	0.351997	0.225342	0.0896221	6.07891	0.0226301	0.110358	0.0137677	0.111891	0.29406	0.10439	0.0692571	0.0231819	0.0609062	0.184921	0.620152	0.642591	2.70805	0.101234	0.410751	0.0377685	0.330983	0.825751	0.0300123	0.0441868	0.061063	0.187461	0.0329343	0.025102	0.187793	0.0920554	0.0278161
ACTR3B	0.0609825	0.276997	0.0269097	0.283784	0.0492022	0.0303024	0.0679244	0.0593883	0.0991418	0.0531657	0.0395533	0.0513691	0.0578503	0.0560439	0.0344839	0.190668	0.0592868	0.0259995	0.351997	0.156016	0.0896221	0.148048	0.0226301	0.0708323	0.0137677	0.076703	0.0360026	0.10439	0.0598652	0.0231819	0.0609062	0.184921	0.0958154	0.0860726	0.181011	0.0821082	0.107531	0.0377685	0.113171	0.13263	0.0300123	0.0441868	0.061063	0.187461	0.0329343	0.025102	0.534827	0.0920554	0.0278161
ACTR3C	0.127509	0.579176	0.0562656	0.212019	0.102877	0.0633596	0.142024	0.124175	0.177767	0.111165	0.0827024	0.0624577	0.12096	0.117183	0.0721028	0.0739124	0.123963	0.0543625	0.735994	0.210162	0.187392	0.233454	0.0473174	0.135081	0.0287871	0.160901	0.0752781	0.218271	0.0731644	0.0484711	0.127349	0.386652	0.195579	0.145187	0.215706	0.0902172	0.23565	0.0789704	0.23663	0.277318	0.0627531	0.0923906	0.127677	0.391965	0.0688626	0.052486	0.285892	0.192479	0.0581609
ACTR5	1e-05	1e-05	1e-05	1e-05	1e-05	1e-05	1e-05	1e-05	1e-05	1e-05	1e-05	1e-05	1e-05	1e-05	1e-05	1e-05	1e-05	1e-05	1e-05	1e-05	1e-05	1e-05	1e-05	1e-05	1e-05	1e-05	1e-05	1e-05	1e-05	1e-05	1e-05	1e-05	1e-05	1e-05	1e-05	1e-05	1e-05	1e-05	1e-05	1e-05	1e-05	1e-05	1e-05	1e-05	1e-05	1e-05	1e-05	1e-05	1e-05
ACTR6	1e-05	1e-05	1e-05	1e-05	1e-05	1e-05	1e-05	1e-05	1e-05	1e-05	1e-05	1e-05	1e-05	1e-05	1e-05	1e-05	1e-05	1e-05	1e-05	1e-05	1e-05	1e-05	0.269889	1e-05	1e-05	1e-05	1e-05	1e-05	1e-05	1e-05	1e-05	1e-05	1.63383	1e-05	1e-05	1e-05	1e-05	1e-05	1e-05	1e-05	1e-05	1e-05	1e-05	1e-05	1e-05	1e-05	1e-05	1e-05	1e-05
ACVRL1	1e-05	1e-05	1e-05	1e-05	1e-05	1e-05	1e-05	1e-05	1e-05	1e-05	1e-05	1e-05	1e-05	1e-05	1e-05	1e-05	1.25257	1e-05	1e-05	1e-05	1e-05	1e-05	1e-05	1e-05	1e-05	1e-05	1e-05	1e-05	0.334096	1e-05	1e-05	1e-05	1e-05	1e-05	1e-05	1e-05	1e-05	1e-05	1e-05	1e-05	1e-05	1e-05	1e-05	1e-05	1e-05	1e-05	1e-05	1e-05	1e-05
ACY1	1.14416	0.204872	0.437063	0.588151	1.19517	0.37579	0.155707	0.290611	0.08244	1.46161	0.140072	1.08968	0.106131	0.330656	0.132046	0.124298	1.00065	0.371302	0.0418109	1.61805	0.0346671	0.185497	0.23144	0.244074	0.0576784	0.565774	0.992095	0.401567	0.309586	0.64448	0.290384	0.670171	0.308746	0.0444669	1.00185	0.3582	0.0256523	0.64624	0.480083	0.583669	0.341384	0.306811	0.400562	0.102753	0.305705	0.370894	0.174034	0.664129	0.764291
ACY3	1e-05	1e-05	1e-05	1e-05	1.12997	1e-05	1e-05	1e-05	1e-05	1e-05	1e-05	1e-05	1e-05	1e-05	1e-05	1e-05	1e-05	1e-05	1e-05	1e-05	1e-05	1e-05	1e-05	1e-05	1e-05	1e-05	1e-05	1e-05	1e-05	1e-05	1e-05	1e-05	1e-05	1e-05	1e-05	1e-05	1e-05	1e-05	1e-05	1e-05	1e-05	1e-05	1e-05	1e-05	1e-05	1e-05	1e-05	1e-05	1e-05
ACYP1	1e-05	1e-05	1e-05	1e-05	1e-05	1e-05	1e-05	1e-05	1e-05	1e-05	1e-05	1e-05	1e-05	1e-05	1e-05	1e-05	1e-05	1e-05	1e-05	1e-05	1e-05	1e-05	1e-05	1e-05	1e-05	1e-05	1e-05	1e-05	1e-05	1e-05	1e-05	1e-05	1e-05	1e-05	1e-05	1e-05	1e-05	1e-05	1e-05	1e-05	1e-05	1e-05	1e-05	1e-05	1e-05	1e-05	1e-05	1e-05	1e-05
ACYP2	1e-05	1e-05	1e-05	1e-05	1e-05	1e-05	1e-05	1e-05	1e-05	1e-05	1e-05	1e-05	1e-05	1e-05	1e-05	1e-05	1e-05	1e-05	1e-05	1e-05	1e-05	1e-05	1e-05	1e-05	1e-05	1e-05	1e-05	1e-05	1e-05	1e-05	1e-05	1e-05	1e-05	1e-05	1e-05	1e-05	1e-05	1e-05	1e-05	1e-05	1e-05	1e-05	1e-05	1e-05	1e-05	1e-05	1e-05	1e-05	1e-05
ADA	1e-05	1e-05	1e-05	1e-05	1e-05	1e-05	1e-05	1e-05	1e-05	1e-05	1e-05	1e-05	1e-05	0.36602	1e-05	1e-05	0.175084	1e-05	1e-05	0.0739175	1e-05	1e-05	1e-05	1e-05	1e-05	1e-05	1e-05	1e-05	1e-05	0.452251	1e-05	1e-05	0.069219	1e-05	1e-05	1e-05	1e-05	1e-05	1e-05	1e-05	1e-05	1e-05	1e-05	1e-05	1e-05	1e-05	1e-05	1e-05	1e-05
ADA2	2.2596	0.184143	0.106038	2.65573	2.58907	3.35555	2.68614	0.115524	0.0684614	2.56695	1.87814	2.77789	2.71377	0.0844869	0.492563	0.100779	2.88042	0.0682512	2.58955	3.35844	0.173508	0.0598247	0.0523295	2.27011	0.195746	2.42879	2.58847	2.65759	2.741	0.020274	2.73757	0.109118	0.103734	2.42704	2.97561	2.51193	3.02486	2.71306	0.031253	2.7388	0.0898406	2.62712	0.0628707	0.0606064	0.0388239	2.91661	2.77519	0.0424875	2.94865
ADAM10	1e-05	1e-05	1e-05	1e-05	0.204224	1e-05	1e-05	0.129296	1e-05	1e-05	1e-05	1e-05	1e-05	1e-05	1e-05	1e-05	1e-05	0.149408	1e-05	1e-05	1e-05	0.15276	1e-05	1e-05	0.0856818	1e-05	1e-05	1e-05	1e-05	1e-05	1e-05	1e-05	0.0626538	1e-05	1e-05	0.0318064	1e-05	1e-05	1e-05	0.161136	0.171664	1e-05	0.0785881	1e-05	1e-05	1e-05	0.221718	1e-05	1e-05
ADAM11	1e-05	1e-05	1e-05	1e-05	1e-05	1e-05	1e-05	1e-05	1e-05	1e-05	1e-05	1e-05	1e-05	1e-05	1e-05	1e-05	1e-05	1e-05	1e-05	1e-05	1e-05	1e-05	1e-05	1e-05	1e-05	1e-05	1e-05	1e-05	1e-05	1e-05	1e-05	1e-05	1e-05	1e-05	1e-05	1e-05	1e-05	1e-05	1e-05	1e-05	1e-05	1e-05	1e-05	1e-05	1e-05	1e-05	1e-05	1e-05	1e-05
ADAM15	1e-05	1e-05	1e-05	1e-05	1e-05	1e-05	1e-05	1e-05	1e-05	1e-05	1e-05	1e-05	1e-05	1e-05	1e-05	1e-05	1e-05	1e-05	1e-05	1e-05	1e-05	1e-05	1e-05	1e-05	1e-05	1e-05	1e-05	1e-05	1e-05	1e-05	1e-05	1e-05	1e-05	1e-05	1e-05	1e-05	1e-05	1e-05	1e-05	1e-05	1e-05	1e-05	1e-05	1e-05	1e-05	1e-05	1e-05	1e-05	1e-05
ADAM17	13.3762	1e-05	1e-05	1e-05	1e-05	1e-05	1e-05	1e-05	1e-05	1e-05	1e-05	1e-05	0.0447419	1e-05	1e-05	10.1414	0.560548	1e-05	1e-05	1e-05	1e-05	1e-05	1e-05	1e-05	1e-05	1e-05	1e-05	1e-05	1e-05	1e-05	1e-05	1e-05	1e-05	1e-05	1e-05	1e-05	1e-05	1e-05	0.184926	1e-05	1e-05	1e-05	1e-05	1e-05	1e-05	1e-05	1e-05	1e-05	1e-05
ADAM22	1e-05	1e-05	1e-05	1e-05	1e-05	1e-05	1e-05	1e-05	1e-05	1e-05	1e-05	1e-05	1e-05	1e-05	1e-05	1e-05	1e-05	1e-05	1e-05	1e-05	1e-05	1e-05	1e-05	1e-05	1e-05	1e-05	1e-05	1e-05	1e-05	1e-05	1e-05	1e-05	1e-05	1e-05	1e-05	1e-05	1e-05	1e-05	0.296159	1e-05	1e-05	1e-05	1e-05	1e-05	1e-05	1e-05	1e-05	1e-05	1e-05
ADAM28	1e-05	1e-05	1e-05	1e-05	1e-05	1e-05	1e-05	1e-05	1e-05	1e-05	1e-05	1e-05	1e-05	1e-05	1e-05	1e-05	1e-05	1e-05	1e-05	1e-05	1e-05	1e-05	1e-05	1e-05	1e-05	1e-05	1e-05	1e-05	1e-05	1e-05	1e-05	1e-05	1e-05	1e-05	1e-05	1e-05	1e-05	1e-05	1e-05	1e-05	1e-05	1e-05	1e-05	1e-05	1e-05	1e-05	1e-05	1e-05	1e-05
ADAM9	1e-05	1e-05	1e-05	1e-05	1e-05	1e-05	1e-05	1e-05	1e-05	1e-05	1e-05	1e-05	1e-05	1e-05	1e-05	1e-05	1.42079	1e-05	1e-05	1e-05	1.25715	1e-05	1e-05	1e-05	0.242754	0.0254067	1e-05	1e-05	1e-05	1e-05	1e-05	1e-05	1e-05	0.571985	1e-05	1e-05	1e-05	1e-05	1e-05	1e-05	1e-05	1e-05	1e-05	1e-05	1e-05	1e-05	1e-05	1e-05	1e-05
ADAMDEC1	1e-05	1e-05	1e-05	1e-05	1e-05	1e-05	1e-05	1e-05	1e-05	1e-05	1e-05	1e-05	1e-05	1e-05	1e-05	1e-05	1e-05	0.0390736	1e-05	1e-05	1e-05	1e-05	1e-05	1e-05	1e-05	1e-05	1e-05	1e-05	1e-05	1e-05	0.0430564	1e-05	1e-05	1e-05	1e-05	1e-05	1e-05	1e-05	1e-05	1e-05	1e-05	1e-05	1e-05	1e-05	1e-05	1e-05	1e-05	1e-05	1e-05
ADAMTS1	1e-05	1e-05	1e-05	1e-05	1e-05	1e-05	1e-05	1e-05	1e-05	1e-05	1e-05	1e-05	1e-05	1e-05	1e-05	1e-05	1e-05	1e-05	1e-05	1e-05	1e-05	1e-05	1e-05	1e-05	1e-05	1e-05	1e-05	1e-05	1e-05	1e-05	1e-05	1e-05	1e-05	1e-05	1e-05	1e-05	1e-05	1e-05	1e-05	1e-05	1e-05	1e-05	1e-05	1e-05	1e-05	1e-05	1e-05	1e-05	1e-05
ADAMTS13	0.771998	0.470481	0.475737	0.480062	0.398754	0.618392	0.654058	0.354918	1.40411	0.465711	0.3626	0.3915	0.539307	0.266451	0.742439	0.329023	0.884029	0.59564	0.378634	0.238494	0.66516	0.438775	0.433424	0.377226	0.367689	0.369282	0.532886	0.489694	0.392976	0.752333	0.477203	1.08784	0.483074	0.287067	0.314978	0.453293	0.3485	0.626949	20.0431	0.249128	0.566269	0.988616	0.334997	0.591532	0.34178	0.661425	0.35954	0.342974	0.165569
ADAMTS4	1e-05	1e-05	1e-05	1e-05	1e-05	1e-05	0.998392	1e-05	1e-05	1e-05	1e-05	1e-05	1e-05	1e-05	1e-05	1e-05	1e-05	1e-05	1e-05	1e-05	1e-05	1e-05	0.973761	1e-05	1e-05	1e-05	1e-05	1e-05	1e-05	1e-05	1e-05	1e-05	1e-05	1e-05	0.874323	1e-05	1e-05	1e-05	1e-05	1e-05	1e-05	1e-05	1e-05	1e-05	0.816083	1e-05	1e-05	1e-05	1e-05
ADAMTSL1	1e-05	1e-05	1e-05	1e-05	1e-05	1e-05	1e-05	1e-05	1e-05	1e-05	1e-05	1e-05	1e-05	1e-05	1e-05	1e-05	1e-05	1e-05	1e-05	1e-05	1e-05	1e-05	1e-05	1e-05	1e-05	1e-05	1e-05	1e-05	1e-05	1e-05	1e-05	1e-05	1e-05	1e-05	1e-05	1e-05	1e-05	1e-05	1e-05	1e-05	1e-05	1e-05	1e-05	1e-05	1e-05	1e-05	1e-05	1e-05	1e-05
ADAMTSL4	1e-05	1e-05	1e-05	1e-05	1e-05	0.0181343	1e-05	1e-05	1e-05	1e-05	1e-05	1e-05	1e-05	1e-05	0.00985419	0.0154015	1e-05	0.0115178	1e-05	1e-05	0.00940636	0.016209	0.00807956	1e-05	0.0117999	1e-05	1e-05	1e-05	1e-05	1e-05	1e-05	0.00902657	0.0161915	1e-05	1e-05	1e-05	1e-05	0.0102176	1e-05	1e-05	0.0282537	1e-05	1e-05	1e-05	0.00770713	1e-05	1e-05	1e-05	1e-05
ADAP1	1e-05	1e-05	0.124794	1e-05	1e-05	1e-05	1e-05	1e-05	1e-05	1e-05	1e-05	1e-05	1e-05	1e-05	1e-05	1e-05	1e-05	1e-05	1e-05	1e-05	1e-05	1e-05	1e-05	1e-05	1e-05	1e-05	1e-05	1e-05	1e-05	1e-05	1e-05	1e-05	1e-05	1e-05	1e-05	1e-05	1e-05	1e-05	1e-05	1e-05	1e-05	1e-05	1e-05	1e-05	1e-05	1e-05	1e-05	1e-05	1e-05
ADAR	2.2596	2.54952	1.24422	2.65573	2.58907	4.4655	2.68614	0.938609	2.63341	2.56695	2.99587	2.77789	3.68007	2.55032	0.913416	0.891725	2.88042	2.79442	2.58955	3.35844	2.61448	0.309944	2.84351	0.661979	2.75609	2.11941	2.58847	0.50091	2.741	0.363091	2.73757	0.847031	1.40953	2.64229	2.97561	2.51193	3.02486	0.926276	2.51576	2.7388	0.388427	2.62712	2.8486	0.828644	2.38399	2.91661	2.77519	2.62817	2.94865
ADARB1	1.0821	0.515348	0.677235	1.41651	1.68083	0.536597	1.27016	0.629293	0.557202	0.833589	0.483807	0.821323	0.420048	1.27394	0.557677	0.678991	0.557069	0.304216	0.72331	0.632112	2.01585	0.325118	0.33432	1.04689	0.288	1.20237	1.03424	1.30197	1.04585	0.779241	0.998476	0.884477	0.938359	1.2252	0.247698	1.70075	0.33267	0.610022	0.449789	0.686407	0.894491	1.64552	0.578518	0.54388	0.302082	1.20019	0.436423	2.41618	0.875465
ADCK5	1e-05	1e-05	1e-05	1e-05	1e-05	1e-05	1e-05	1e-05	1e-05	1e-05	1e-05	1e-05	1e-05	1e-05	1e-05	1e-05	1e-05	1e-05	1e-05	1e-05	1e-05	1e-05	1e-05	1e-05	1e-05	1e-05	1e-05	1e-05	1e-05	1e-05	1e-05	1e-05	1e-05	1e-05	1e-05	1e-05	1e-05	0.679774	1e-05	1e-05	1e-05	1e-05	1e-05	1e-05	1e-05	1e-05	1e-05	1e-05	1e-05
ADCY5	1e-05	1e-05	1e-05	1e-05	1e-05	1e-05	1e-05	1e-05	1e-05	1e-05	1e-05	1e-05	1e-05	1e-05	1e-05	1e-05	1e-05	1e-05	1e-05	1e-05	1e-05	1e-05	1e-05	1e-05	1e-05	1e-05	1e-05	1e-05	0.368936	1e-05	1e-05	1e-05	1e-05	1e-05	1e-05	1e-05	0.710953	0.591045	1e-05	1e-05	1e-05	1e-05	1e-05	1e-05	1e-05	1e-05	1e-05	1e-05	1e-05
ADCY6	1e-05	1e-05	1e-05	1e-05	1e-05	1e-05	1e-05	1e-05	1e-05	1e-05	1e-05	1e-05	1e-05	1e-05	1e-05	1e-05	1e-05	1e-05	1e-05	1e-05	1e-05	1e-05	1e-05	1e-05	1e-05	1e-05	1e-05	1e-05	1e-05	1e-05	1e-05	1e-05	1e-05	1e-05	1e-05	1e-05	1e-05	1e-05	1e-05	1e-05	1e-05	1e-05	1e-05	1e-05	1e-05	1e-05	1e-05	1e-05	1e-05
ADCY8	1e-05	1e-05	1e-05	1e-05	1e-05	1e-05	1e-05	1e-05	1e-05	1e-05	1e-05	1e-05	1e-05	1e-05	0.595596	1e-05	1e-05	1e-05	1e-05	1e-05	1e-05	1e-05	1e-05	1e-05	1e-05	1e-05	1e-05	1e-05	1e-05	1e-05	1e-05	1e-05	1e-05	1e-05	1e-05	1e-05	1e-05	1e-05	1e-05	1e-05	1e-05	1e-05	1e-05	1e-05	1e-05	1e-05	1e-05	1e-05	1e-05
ADD1	0.262089	0.480989	0.377991	0.223609	0.376301	0.822304	0.369609	0.222015	0.48473	0.751927	0.151571	0.539831	0.144444	0.735306	0.393336	0.727725	0.327101	0.492756	0.676173	0.378332	0.546386	0.703627	0.38646	0.258049	1.39747	0.847136	0.390124	0.46337	0.246093	0.230306	0.949923	0.272836	0.240317	0.302666	0.313334	0.149692	0.164309	0.259174	0.332973	0.56333	0.358357	0.503271	0.417895	0.189314	0.495948	0.375022	0.486652	0.171274	0.593228
ADD2	2.2596	2.54952	2.76675	0.114634	0.242738	2.66382	2.68614	0.458648	0.632034	2.56695	2.91754	2.77789	2.71377	2.55032	2.77399	0.401081	0.484323	2.79442	0.257732	3.35844	2.81914	0.186856	2.84351	0.109668	2.75609	0.206703	0.0823505	2.65759	2.741	2.70796	2.73757	2.56784	2.52944	2.42704	0.0414612	2.51193	3.02486	2.71306	2.51576	2.7388	2.39571	2.62712	2.8486	0.541399	2.38399	0.598099	2.77519	2.62817	2.94865
ADD3	2.18353	0.609712	0.544545	0.0297899	0.0818589	1.16542	0.796171	0.589531	0.0417534	2.40767	1.03616	0.724512	0.40657	0.0387429	0.952807	0.548493	0.861888	1.71219	2.93409	0.634076	0.876221	0.571863	1.4115	0.41048	0.794362	0.222494	0.22944	1.37174	0.205977	1.26466	3.62962	1.33766	0.903215	0.879595	0.712595	2.7754	1.65629	1.16128	0.401208	0.67499	4.27198	1.63829	0.918704	0.916666	0.885026	0.510087	1.11418	1.41259	1.82607
ADGRB3	0.693208	0.954192	0.849859	0.703868	0.831549	0.637866	0.537181	0.519552	0.436519	0.468105	0.724499	0.591696	0.983146	0.604559	0.68607	0.501393	1.07095	0.597711	0.332198	0.885719	0.521038	0.611031	0.253646	0.62962	0.564018	0.885343	0.427953	0.936618	0.776377	0.921941	0.647547	0.769308	0.675482	0.408468	0.906246	0.521337	0.731558	0.638426	0.599935	0.503169	0.451508	0.688815	0.549386	0.80538	0.610191	0.508528	0.389663	0.718112	0.284052
ADGRD1	1e-05	1e-05	1e-05	1e-05	1e-05	1e-05	1e-05	1e-05	1e-05	1e-05	1e-05	1e-05	1e-05	1e-05	1e-05	1e-05	1e-05	1e-05	1e-05	1e-05	1e-05	1e-05	1e-05	1e-05	1e-05	1e-05	1e-05	1e-05	1e-05	1e-05	1e-05	1e-05	1e-05	1e-05	1e-05	1e-05	0.109693	1e-05	1e-05	1e-05	1e-05	0.0608141	1e-05	1e-05	1e-05	1e-05	1e-05	1e-05	1e-05
ADGRE5	1e-05	1e-05	1e-05	1e-05	1e-05	1e-05	1e-05	1e-05	1e-05	1e-05	1e-05	1e-05	1e-05	1e-05	1e-05	1e-05	1e-05	1e-05	0.0293319	1e-05	1e-05	1e-05	1e-05	1e-05	1e-05	1e-05	3.32813	1e-05	1e-05	1e-05	0.0280958	1e-05	1e-05	1e-05	1e-05	1e-05	1e-05	1e-05	1e-05	1e-05	1e-05	1e-05	1e-05	1e-05	1e-05	1e-05	1e-05	1e-05	0.0834463
ADGRF5	1e-05	1e-05	1e-05	1e-05	1e-05	1e-05	1e-05	1e-05	1e-05	1e-05	1e-05	1e-05	1e-05	1e-05	1e-05	0.023276	0.0772546	1e-05	1e-05	1e-05	1e-05	1e-05	1e-05	1e-05	1e-05	1e-05	1e-05	1e-05	1e-05	1e-05	1e-05	1e-05	1e-05	1e-05	1e-05	1e-05	1.3125	1e-05	1e-05	1e-05	1e-05	1e-05	1e-05	1e-05	1e-05	1e-05	1e-05	1e-05	1e-05
ADGRG1	1e-05	1e-05	1e-05	1e-05	1e-05	1e-05	1e-05	1e-05	1e-05	1e-05	1e-05	1e-05	1e-05	1e-05	1e-05	1e-05	1e-05	1e-05	1e-05	1e-05	1e-05	1e-05	1e-05	0.518659	1e-05	1e-05	1e-05	1e-05	1e-05	1e-05	1e-05	1e-05	1e-05	1e-05	1e-05	1e-05	1e-05	1e-05	1e-05	1e-05	1e-05	1e-05	1e-05	1e-05	1e-05	1e-05	1e-05	1e-05	1e-05
ADGRG3	1e-05	1e-05	1e-05	1e-05	1e-05	1e-05	1e-05	1e-05	1e-05	1e-05	1e-05	1e-05	1e-05	1e-05	1e-05	1e-05	1e-05	1e-05	1e-05	1e-05	1e-05	1e-05	1e-05	1e-05	1e-05	1e-05	1e-05	1e-05	1e-05	1e-05	1e-05	1e-05	1e-05	1e-05	1e-05	1e-05	1e-05	1e-05	1e-05	1e-05	1e-05	1e-05	1e-05	1e-05	1e-05	1e-05	1e-05	1e-05	1e-05
ADGRG6	1e-05	1e-05	1e-05	1e-05	1e-05	1e-05	1e-05	1e-05	4.62992	0.0422703	1e-05	1e-05	1e-05	1e-05	1e-05	1e-05	1e-05	1e-05	1e-05	0.0548814	0.0476586	1e-05	1e-05	2.63034	1e-05	1e-05	1e-05	0.123182	1e-05	1e-05	1e-05	1e-05	1e-05	2.96457	0.174779	1e-05	1e-05	1e-05	4.27818	0.0390765	0.0115328	1e-05	1e-05	1e-05	1e-05	1e-05	5.03153	1e-05	1e-05
ADGRL1	1e-05	1e-05	1e-05	1e-05	1e-05	1e-05	1e-05	1e-05	1e-05	1e-05	1e-05	1e-05	1e-05	1e-05	1e-05	1e-05	1e-05	1e-05	1e-05	1e-05	1e-05	1e-05	1e-05	1e-05	1e-05	1e-05	1e-05	1e-05	1e-05	1e-05	1e-05	1e-05	1e-05	1e-05	1e-05	1e-05	1e-05	1e-05	1e-05	1e-05	1e-05	1e-05	1e-05	1e-05	1e-05	1e-05	1e-05	1e-05	1e-05
ADGRL2	0.1529	0.239267	0.217905	0.273697	0.0127822	0.415169	0.264817	0.144943	0.270798	0.197071	0.193069	0.0427058	0.267398	0.257438	0.186418	0.260302	0.205631	0.349765	0.15982	0.303356	0.291004	0.41721	0.191317	0.0632772	0.246887	0.218746	0.205264	0.252249	0.331563	0.297674	0.31706	0.465825	0.223441	0.388383	0.184691	0.301831	0.206242	0.0379907	0.160969	0.205689	0.368551	0.400092	0.162326	0.153766	0.243293	0.215917	0.29193	0.162863	0.220457
ADGRL3	1e-05	1e-05	1e-05	1e-05	1e-05	1e-05	1e-05	1e-05	1e-05	1e-05	1e-05	1e-05	1e-05	1e-05	1e-05	1e-05	0.155462	1e-05	1e-05	1e-05	1e-05	1e-05	1e-05	1e-05	1e-05	1e-05	1e-05	1e-05	1e-05	1e-05	1e-05	1e-05	1e-05	1e-05	1e-05	1e-05	1e-05	1e-05	1e-05	1e-05	1e-05	1e-05	1e-05	1e-05	1e-05	1e-05	1e-05	1e-05	1e-05
ADGRL4	1e-05	6.49256	1e-05	1e-05	1e-05	1e-05	1e-05	1e-05	1e-05	1e-05	1e-05	1e-05	1e-05	3.35737	1e-05	1e-05	1e-05	1e-05	1e-05	1e-05	1e-05	1e-05	1e-05	3.46964	1e-05	1e-05	1e-05	1e-05	1e-05	1e-05	1e-05	1e-05	1e-05	1e-05	2.10727	1e-05	1e-05	1e-05	1e-05	1e-05	1e-05	1e-05	1e-05	1e-05	1e-05	1e-05	1e-05	1e-05	1e-05
ADH1A	0.113154	2.54952	0.344886	2.76338	0.234298	2.66382	2.68614	2.46211	0.0683041	1.43497	1.25894	0.0396898	2.71377	2.55032	2.77399	2.61719	2.88042	2.79442	1.40664	3.35844	1.46474	2.55642	2.84351	2.27011	2.75609	0.0789529	2.58847	0.479192	2.741	2.70796	1.54165	2.865	2.52944	2.42704	0.112432	2.51193	0.990689	2.71306	2.51576	2.7388	0.28473	2.0428	2.8486	2.36968	1.6864	2.91661	0.221557	2.62817	0.03357
ADH1B	0.876829	1.64107	6.41149	1.76865	1.36069	6.06912	1.22628	4.61507	1.99488	1.31019	1.14947	3.83755	5.63768	1.83006	0.342945	0.234017	1.55889	1.38309	1.28433	2.18883	1.33737	0.0605555	1.29463	1.28751	1.43237	0.0720874	1.2127	0.176127	1.41685	1.00676	1.40759	6.0492	1.22278	1.08041	0.102655	1.36186	5.17734	1.23411	4.62092	1.2574	0.259971	1.86516	1.35774	0.883561	4.57864	1.22505	0.202291	1.26624	0.0306509
ADH1C	0.103314	1.63133	2.72911	2.52309	1.14525	1.52324	0.821569	0.809389	1.33729	1.31019	1.14947	0.446467	0.908492	1.83006	0.342945	0.951071	2.74242	1.13029	1.28433	0.4178	2.27353	2.78093	0.990014	1.13088	1.23404	0.837373	0.743703	0.437523	0.835373	2.49619	1.40759	0.7918	1.46079	1.25405	1.15415	0.973965	0.904542	1.38777	0.737378	1.2574	0.937588	1.86516	1.06977	0.855861	2.23325	1.02297	0.202291	0.592996	0.0306509
ADH4	0.93946	1e-05	1e-05	1e-05	0.823621	1e-05	1e-05	1e-05	2.10382	1e-05	1e-05	1e-05	1e-05	1e-05	1e-05	0.244654	1e-05	1e-05	0.8138	1e-05	1e-05	0.063308	1e-05	1e-05	1e-05	0.461473	1e-05	1e-05	0.233808	1e-05	1e-05	1e-05	1e-05	1e-05	1e-05	1e-05	1e-05	1e-05	0.646449	1e-05	0.214712	1e-05	1e-05	1e-05	1e-05	1e-05	1e-05	1e-05	0.262611
ADH5	0.557547	2.27021	1.34493	0.308294	0.615559	1.51146	0.80056	0.961119	0.295638	0.292252	2.11093	1.94488	0.981781	0.311391	1.62987	0.290305	1.26933	1.04364	0.798741	5.53556	1.16095	0.974015	1.86481	1.26699	4.58544	1.5984	3.728	0.145763	1.08151	3.77143	1.09021	1.69742	0.577595	0.843292	2.77502	1.01693	5.28598	1.81983	0.541098	0.310383	0.69976	0.953263	1.06098	0.673001	1.27524	1.16311	1.22062	1.01643	0.39908
ADH6	1e-05	1e-05	2.98902	1e-05	1e-05	1.66831	1e-05	1e-05	1.00133	1e-05	1e-05	1e-05	1e-05	1e-05	1e-05	1e-05	3.0036	1e-05	1e-05	1e-05	9.76502	1e-05	1e-05	1e-05	1e-05	1e-05	1e-05	1e-05	1e-05	1.63127	1e-05	13.3262	9.40831	1.37348	1e-05	1e-05	1e-05	1e-05	1e-05	1e-05	1e-05	1e-05	1e-05	1e-05	0.759542	1e-05	1e-05	1e-05	1e-05
ADH7	1e-05	1e-05	0.38857	1e-05	1e-05	1e-05	1e-05	1e-05	1e-05	0.313859	1e-05	1e-05	1e-05	0.783293	1e-05	1e-05	1e-05	1e-05	1e-05	1e-05	1e-05	1e-05	1e-05	1e-05	1e-05	1e-05	1e-05	0.518192	1e-05	1e-05	1e-05	1e-05	1e-05	1e-05	1e-05	1e-05	1e-05	1e-05	1e-05	1e-05	1e-05	1e-05	1e-05	1e-05	1e-05	1e-05	1e-05	0.388349	1e-05
ADHFE1	1e-05	1e-05	1e-05	1e-05	1e-05	1e-05	1e-05	1e-05	1e-05	1e-05	1e-05	1e-05	1e-05	1e-05	1e-05	1e-05	0.142564	1e-05	1e-05	1e-05	1e-05	1e-05	1e-05	1e-05	1e-05	1e-05	1e-05	1e-05	1e-05	1e-05	1e-05	1e-05	1e-05	1e-05	1e-05	1e-05	1e-05	1e-05	1e-05	1e-05	1e-05	1e-05	1e-05	1e-05	1e-05	1e-05	1e-05	1e-05	1e-05
ADI1	1e-05	1e-05	1e-05	1e-05	1e-05	1e-05	1e-05	1e-05	1e-05	1.03449	1e-05	1e-05	1e-05	1e-05	1e-05	1e-05	1e-05	1e-05	1e-05	1e-05	1e-05	1e-05	1e-05	1e-05	1e-05	1e-05	1e-05	1e-05	1e-05	1e-05	1e-05	1e-05	1e-05	1e-05	7.1417	1e-05	1e-05	1e-05	9.73418	1e-05	1e-05	1e-05	1e-05	1e-05	1e-05	1e-05	1e-05	10.0179	13.3933
ADIPOQ	10.7733	3.31244	8.82355	14.0168	7.02652	7.73538	3.76433	7.58343	5.10642	16.3076	5.11314	6.23938	3.48615	2.42741	20.4237	9.76542	3.38172	12.5608	3.09203	4.28121	5.22746	3.92201	9.96203	3.50346	2.5943	9.00283	9.06149	8.57241	16.8126	11.1727	4.96594	3.93087	10.5086	12.9192	8.56335	9.29503	6.14346	12.2132	6.59364	4.62812	4.37426	4.0837	10.1175	6.88718	4.38718	10.8119	9.76858	6.31012	13.8051
ADIRF	1e-05	1e-05	1e-05	1e-05	1e-05	1e-05	1e-05	1e-05	1e-05	1e-05	1e-05	1e-05	1e-05	1e-05	1e-05	1e-05	1e-05	1e-05	1e-05	1e-05	1e-05	1e-05	1e-05	1e-05	1e-05	1e-05	1e-05	1e-05	1e-05	1e-05	1e-05	1e-05	1e-05	1e-05	1e-05	1e-05	1e-05	1e-05	1e-05	1e-05	1e-05	1e-05	1e-05	1e-05	1e-05	1e-05	1e-05	1e-05	1e-05
ADK	1e-05	3.79761	1e-05	1e-05	1e-05	1e-05	1e-05	1e-05	1e-05	1e-05	1e-05	0.751206	1e-05	7.68224	1e-05	1e-05	1e-05	1e-05	1e-05	1e-05	7.45313	0.463384	1e-05	1e-05	1e-05	0.927073	10.4563	1e-05	1e-05	1e-05	6.93823	1e-05	0.0904569	1e-05	1e-05	1e-05	1e-05	0.316367	1e-05	1e-05	1e-05	1e-05	6.85721	1e-05	9.64727	1e-05	1e-05	1e-05	1e-05
ADNP	1e-05	1e-05	1e-05	1e-05	1e-05	1e-05	1e-05	1e-05	1e-05	1e-05	1e-05	1e-05	1e-05	1e-05	1e-05	1e-05	1e-05	1e-05	1e-05	1e-05	1e-05	1e-05	1e-05	1e-05	1e-05	1e-05	1e-05	1e-05	1e-05	1e-05	1e-05	1e-05	1e-05	1e-05	1e-05	1e-05	1e-05	1e-05	1e-05	1e-05	1e-05	1e-05	1e-05	1e-05	1e-05	1e-05	0.162827	1e-05	1.36515
ADPGK	0.607797	0.729231	3.0389	0.881746	0.825035	0.828865	0.857255	0.638623	0.820695	0.402308	1.46923	0.781202	0.744144	0.726463	0.914177	0.297146	2.67055	0.743701	0.63587	0.665088	1.17926	0.137797	0.771565	1.09448	0.650322	0.444688	0.671869	1.57719	0.718299	1.02733	0.939725	0.954535	1.02741	0.806467	0.602133	0.577149	1.08859	7.88381	1.33223	0.378073	0.59406	0.730139	0.554309	1.20775	0.875412	0.0985561	0.507418	1.55864	0.645882
ADPRH	1e-05	1e-05	1e-05	1e-05	1e-05	1e-05	1e-05	1e-05	0.441437	1e-05	1e-05	1e-05	1e-05	1e-05	1e-05	1e-05	1e-05	1e-05	1e-05	1e-05	1e-05	1e-05	1e-05	1e-05	1e-05	1e-05	1e-05	1e-05	1e-05	1e-05	1e-05	1e-05	1e-05	1e-05	1e-05	1e-05	1e-05	1e-05	1e-05	1e-05	1e-05	1e-05	1e-05	1e-05	1e-05	1e-05	3.72398	1e-05	1e-05
ADPRS	1e-05	14.1044	1e-05	1e-05	1e-05	0.462229	1e-05	1e-05	1e-05	14.7586	1e-05	12.0132	1e-05	1e-05	1e-05	1e-05	1e-05	1e-05	1e-05	1e-05	1e-05	1e-05	7.08783	1e-05	1e-05	1e-05	1e-05	1e-05	1e-05	1e-05	1e-05	1e-05	0.553234	1e-05	1e-05	1e-05	1e-05	1e-05	1e-05	1e-05	1e-05	1e-05	1e-05	9.80433	1e-05	0.0716167	1e-05	4.64094	1e-05
ADRA2A	1e-05	1e-05	1e-05	1e-05	1e-05	1e-05	1e-05	1e-05	1e-05	1e-05	1e-05	1e-05	1e-05	1e-05	1e-05	1e-05	1e-05	1e-05	1e-05	1e-05	1e-05	1e-05	1e-05	1e-05	1e-05	1e-05	1e-05	1e-05	1e-05	1e-05	0.183704	1e-05	1e-05	1e-05	1e-05	1e-05	1e-05	1e-05	1e-05	1e-05	1e-05	1e-05	1e-05	1e-05	1e-05	1e-05	1e-05	1e-05	1e-05
ADRM1	1e-05	1e-05	1e-05	1e-05	1e-05	1e-05	1e-05	1e-05	1e-05	1e-05	1e-05	1e-05	1e-05	1e-05	1e-05	1e-05	1e-05	1e-05	1e-05	1e-05	1e-05	1e-05	1e-05	1e-05	1e-05	1e-05	1e-05	1e-05	1e-05	1e-05	1e-05	1e-05	1e-05	1e-05	1e-05	1e-05	1e-05	1e-05	1e-05	1e-05	1e-05	1e-05	1e-05	1e-05	1e-05	1e-05	1e-05	1e-05	1e-05
ADSL	15.7637	15.1902	37.6967	36.8197	18.4778	17.7036	32.6846	28.3103	5.86245	21.2822	42.0126	8.495	24.5912	16.6306	7.49203	17.9193	28.0159	6.06271	13.3144	18.8517	30.7589	24.088	17.2643	23.3399	68.5185	4.77189	14.544	20.8472	18.6176	22.8369	29.0189	20.5835	7.8941	8.38456	24.1168	46.3498	14.6844	25.9506	37.0309	14.2787	6.26547	5.54063	18.932	14.8372	7.03437	5.70359	28.2956	25.0917	3.21796
ADSS1	1e-05	1e-05	1e-05	1e-05	1e-05	1e-05	1e-05	1e-05	1e-05	1e-05	1e-05	1e-05	1e-05	1e-05	1e-05	1e-05	1e-05	1e-05	1e-05	1e-05	1e-05	1e-05	1e-05	1e-05	1e-05	1e-05	1e-05	1e-05	1e-05	1e-05	1e-05	1e-05	1e-05	1e-05	1e-05	1e-05	1e-05	1e-05	1e-05	1e-05	1e-05	1e-05	1e-05	1e-05	1e-05	1e-05	1e-05	1e-05	1e-05
ADSS2	0.306916	1e-05	1e-05	1e-05	1e-05	0.0477324	1e-05	0.0558879	1e-05	0.0423156	1e-05	1e-05	1e-05	1e-05	0.0285067	0.0568044	1e-05	1e-05	0.0326294	1e-05	1e-05	0.0544494	1e-05	1e-05	0.0576935	1e-05	1e-05	1e-05	1e-05	0.21904	1e-05	0.0654081	1e-05	1e-05	1e-05	1e-05	0.209893	1e-05	1e-05	1e-05	1e-05	1e-05	1e-05	1e-05	0.341783	1e-05	1e-05	1e-05	1e-05
AEBP1	1e-05	1e-05	1e-05	1e-05	1e-05	1e-05	1e-05	2.52083	1e-05	1e-05	1e-05	1e-05	1e-05	1e-05	1e-05	0.0148549	1e-05	1e-05	1e-05	1e-05	1e-05	2.98352	1e-05	1e-05	1e-05	1e-05	1e-05	1e-05	1e-05	1e-05	1e-05	1e-05	0.0281627	1e-05	1e-05	0.0971981	1e-05	1e-05	1e-05	1e-05	1e-05	1e-05	0.625154	0.21171	1e-05	1e-05	1e-05	1e-05	1e-05
AFAP1	0.102068	1e-05	1e-05	1e-05	1e-05	1e-05	1e-05	1e-05	1e-05	1e-05	1e-05	1e-05	1e-05	1e-05	1e-05	1e-05	1e-05	1e-05	1e-05	1e-05	1e-05	1e-05	1e-05	1e-05	1e-05	1e-05	1e-05	1e-05	1e-05	1e-05	1e-05	1e-05	1e-05	1e-05	1e-05	1e-05	1e-05	1e-05	1e-05	1e-05	1e-05	1e-05	1e-05	1e-05	1e-05	1e-05	1e-05	1e-05	1e-05
AFAP1L2	1e-05	1e-05	1e-05	1e-05	1e-05	1e-05	1e-05	1e-05	1e-05	1e-05	1e-05	1e-05	1e-05	1e-05	1e-05	1e-05	1e-05	0.0232678	1e-05	1e-05	1e-05	1e-05	1e-05	1e-05	1e-05	1e-05	1e-05	1e-05	1e-05	1e-05	1e-05	1e-05	1e-05	1e-05	1e-05	1e-05	1e-05	1e-05	1e-05	1e-05	1e-05	1e-05	1e-05	1e-05	1e-05	1e-05	1e-05	1e-05	1e-05
AFDN	0.233768	0.261213	0.485265	0.101097	0.241668	0.289107	0.0284533	0.228976	0.273929	0.140458	0.364704	0.438687	0.206076	0.144871	0.322586	0.278808	0.244396	0.197918	0.353282	3.07974	0.236367	0.198648	0.461945	0.434535	0.195809	0.214862	0.234298	0.149091	0.230775	0.194315	0.485854	0.359899	0.276065	2.00371	0.300112	0.137285	0.652671	0.205603	0.263935	0.0767403	0.157815	0.236043	0.429885	0.0767348	0.486577	0.314583	0.44653	0.200876	0.397787
AFF4	1e-05	1e-05	1e-05	1e-05	1e-05	1e-05	1e-05	1e-05	1e-05	1e-05	1e-05	1e-05	1e-05	1e-05	1e-05	1e-05	1e-05	1e-05	1e-05	1e-05	1e-05	1e-05	1e-05	1e-05	1e-05	1e-05	1e-05	1e-05	1e-05	1e-05	1e-05	1e-05	1e-05	1e-05	1e-05	1e-05	1e-05	1e-05	1e-05	1e-05	1e-05	1e-05	1e-05	1e-05	1e-05	1e-05	1e-05	1e-05	1e-05
AFG1L	1e-05	1e-05	1e-05	1e-05	1e-05	1e-05	1e-05	1e-05	1e-05	1e-05	1e-05	1e-05	1e-05	1e-05	1e-05	1e-05	1e-05	1e-05	1e-05	1.98486	1e-05	3.0826	1e-05	1e-05	1e-05	1e-05	1e-05	1e-05	1e-05	1e-05	1e-05	1e-05	1e-05	1e-05	1e-05	1e-05	1e-05	1e-05	1e-05	1e-05	1e-05	1e-05	1e-05	1e-05	1e-05	1e-05	1e-05	1e-05	4.94399
AFG3L2	1e-05	1e-05	1e-05	1e-05	0.246891	0.0852822	1e-05	1e-05	1e-05	1e-05	1e-05	0.388649	1e-05	1e-05	0.0741384	1e-05	1e-05	0.147672	1e-05	0.702694	1e-05	0.0296144	0.0563547	1e-05	0.381865	0.136028	1e-05	1e-05	0.177306	1e-05	1e-05	1e-05	0.198661	1e-05	1e-05	1e-05	1e-05	1e-05	1e-05	1e-05	1e-05	1e-05	1e-05	0.113179	0.0335719	1e-05	1e-05	1e-05	1e-05
AFM	38.6736	47.9009	44.557	40.2715	37.255	37.828	31.8177	44.9821	43.4752	36.4421	40.467	35.102	37.8549	33.6768	51.1666	43.2588	45.9741	45.2645	38.6412	60.7637	43.469	45.8961	35.9688	45.3429	38.3152	36.2885	29.1246	37.2655	36.8644	71.9296	33.8843	50.9369	44.07	38.3498	49.101	41.6966	50.7568	62.5567	40.9264	40.5705	15.808	35.5251	36.3619	36.3063	32.7958	26.0423	36.3119	30.0166	37.606
AFTPH	1e-05	1e-05	1e-05	1e-05	1e-05	1e-05	1e-05	1e-05	1e-05	1e-05	1e-05	1e-05	1e-05	1e-05	1e-05	1e-05	1e-05	1e-05	1e-05	1e-05	1e-05	1e-05	0.0729123	0.150215	1e-05	1e-05	1e-05	1e-05	1e-05	1e-05	1e-05	1e-05	1e-05	1e-05	0.231964	1e-05	1e-05	1e-05	1e-05	1e-05	1e-05	1e-05	1e-05	1e-05	1e-05	1e-05	1e-05	1e-05	1e-05
AGA	1e-05	1e-05	1e-05	1e-05	1e-05	1e-05	0.416913	1e-05	1e-05	0.42173	0.314544	1e-05	1e-05	1e-05	1e-05	1e-05	1e-05	0.275462	1e-05	1e-05	1e-05	1e-05	1e-05	1e-05	1e-05	1e-05	1e-05	1e-05	1e-05	1e-05	1e-05	1e-05	0.259472	1e-05	1e-05	1e-05	1e-05	1e-05	1e-05	1e-05	1e-05	1e-05	1e-05	1e-05	1e-05	0.085802	1e-05	1e-05	1e-05
AGAP1	0.236164	1e-05	1e-05	1e-05	1e-05	1e-05	1e-05	1e-05	1e-05	1e-05	1e-05	1e-05	1e-05	1e-05	1e-05	1e-05	1e-05	1e-05	1e-05	1e-05	1e-05	1e-05	1e-05	1e-05	1e-05	1e-05	1e-05	1e-05	1e-05	1e-05	1e-05	1e-05	1e-05	1e-05	1e-05	1e-05	1e-05	1e-05	1e-05	1e-05	1e-05	1e-05	1e-05	1e-05	1e-05	1e-05	0.116206	1e-05	1e-05
AGAP2	1e-05	1e-05	1e-05	1e-05	1e-05	1e-05	1e-05	1e-05	1e-05	1e-05	0.0753507	1e-05	1e-05	1e-05	1e-05	1e-05	1e-05	1e-05	1e-05	1e-05	1e-05	1e-05	1e-05	1e-05	1e-05	1e-05	1e-05	1e-05	1e-05	1e-05	1e-05	1e-05	1e-05	1e-05	1e-05	1e-05	1e-05	1e-05	1e-05	1e-05	1e-05	1e-05	1e-05	1e-05	1e-05	1e-05	1e-05	1e-05	1e-05
AGAP3	1e-05	1e-05	1e-05	1e-05	1e-05	1e-05	1e-05	1e-05	1e-05	1e-05	1e-05	1e-05	1e-05	1e-05	1e-05	1e-05	1e-05	1e-05	1e-05	1e-05	1e-05	1e-05	1e-05	1e-05	1e-05	1e-05	1e-05	1e-05	1e-05	1e-05	1e-05	1e-05	1e-05	1e-05	1e-05	1e-05	1e-05	1e-05	1e-05	1e-05	1e-05	1e-05	1e-05	1e-05	1e-05	1e-05	1e-05	1e-05	1e-05
AGER	1e-05	1e-05	1e-05	1e-05	1e-05	1e-05	1e-05	1e-05	1e-05	1e-05	1e-05	0.482903	1e-05	1e-05	1e-05	1e-05	1e-05	1e-05	1e-05	1e-05	1e-05	1e-05	1e-05	1e-05	1e-05	1e-05	1e-05	1e-05	1e-05	1e-05	1e-05	1e-05	1e-05	1e-05	1e-05	1e-05	1e-05	1e-05	1e-05	1e-05	1e-05	1e-05	1e-05	1e-05	1e-05	1e-05	1e-05	0.355795	1e-05
AGFG1	1e-05	1e-05	1e-05	1e-05	1e-05	1e-05	1e-05	1e-05	1e-05	1e-05	1e-05	1e-05	1e-05	1e-05	1e-05	1e-05	1e-05	1e-05	1e-05	1e-05	1e-05	1e-05	1e-05	1e-05	1e-05	1e-05	1e-05	1e-05	1e-05	1e-05	1e-05	1e-05	1e-05	1e-05	1e-05	1e-05	1e-05	1e-05	0.347153	1e-05	1e-05	1e-05	1e-05	1e-05	1e-05	1e-05	1e-05	1e-05	1e-05
AGFG2	1e-05	1e-05	1e-05	1e-05	1e-05	0.513344	1e-05	1e-05	1e-05	1e-05	1e-05	1e-05	1e-05	1e-05	1e-05	1e-05	1e-05	1e-05	1e-05	1e-05	1e-05	1e-05	1e-05	1e-05	1e-05	1e-05	1e-05	1e-05	1e-05	1e-05	1e-05	1e-05	1e-05	1e-05	1e-05	1e-05	1e-05	1e-05	1e-05	1e-05	1e-05	1e-05	1e-05	1e-05	1e-05	1e-05	1e-05	1e-05	1e-05
AGK	2.0113	0.470184	0.450174	2.65573	2.58907	1.17123	2.68614	2.46211	2.63341	2.56695	2.91754	2.77789	2.71377	2.55032	2.77399	0.450383	1.7835	2.79442	7.35456	3.35844	0.68387	2.55642	2.84351	2.27011	0.199461	0.430752	2.58847	2.54478	2.741	1.89181	2.73757	2.865	2.52944	0.68394	2.97561	4.36239	3.02486	2.71306	2.51576	0.928875	2.39571	2.62712	2.8486	2.36968	2.38399	2.91661	2.77519	2.62817	2.94865
AGL	2.2596	2.54952	0.0931734	2.65573	0.214848	2.66382	2.68614	2.46211	0.2089	0.1216	0.777441	0.125005	0.779074	2.55032	0.034411	2.61719	2.88042	0.754349	2.58955	3.35844	2.81914	0.250543	0.947429	0.584798	0.149009	2.42879	2.58847	0.18025	0.470932	2.70796	2.73757	2.865	2.52944	0.0309558	2.97561	0.109984	0.740576	0.147453	2.51576	2.7388	0.351383	2.62712	1.03521	2.36968	2.38399	2.91661	0.436125	2.62817	0.744273
AGMAT	2.2596	2.54952	2.68715	2.65573	2.58907	2.66382	2.68614	2.46211	2.63341	2.56695	4.8914	3.01432	7.2543	4.36752	2.77399	2.61719	2.99189	4.344	5.63695	3.35844	2.81914	2.55642	4.78821	4.64631	2.75609	2.42879	2.58847	4.0816	2.741	2.70796	4.06688	6.90218	2.52944	2.42704	2.97561	2.51193	4.53505	2.71306	2.51576	3.56931	5.97171	2.62712	4.35761	4.70653	2.38399	2.91661	2.77519	2.62817	2.94865
AGO1	0.0320928	1e-05	1e-05	1e-05	1e-05	1e-05	1e-05	1e-05	1e-05	1e-05	1e-05	1e-05	1e-05	1e-05	1e-05	1e-05	1e-05	0.0336727	0.148543	1e-05	1e-05	1e-05	0.251365	1e-05	1e-05	0.170122	1e-05	1e-05	1e-05	1e-05	1e-05	1e-05	1e-05	1e-05	1e-05	1e-05	0.295249	1e-05	1e-05	1e-05	1e-05	1e-05	1e-05	1e-05	1e-05	1e-05	1e-05	1e-05	1e-05
AGO2	0.0315093	4.17548	1.10072	0.559526	1.35704	1.65637	0.980891	0.704973	0.00976096	0.86346	1.6768	1.02428	0.0344511	1.30885	1.99047	1.48198	1.27092	0.0330605	0.67155	1.08678	1.2979	0.552559	0.496741	1.26591	0.961904	1.06078	2.83289	0.989038	0.993879	2.32094	1.34494	1.1921	0.858384	1.49511	0.148533	0.127666	1.61203	1.2219	1.14963	0.648173	0.985537	0.677881	0.856511	1.4115	0.949413	0.248999	3.21479	2.4205	1.44567
AGO3	0.0320928	2.81045	1e-05	0.355442	0.226363	1e-05	1e-05	1e-05	1e-05	1e-05	1e-05	1e-05	1e-05	1e-05	1e-05	1e-05	1e-05	0.0336727	0.137401	1e-05	1e-05	1e-05	0.251365	1e-05	1e-05	1e-05	3.09479	1e-05	1e-05	2.36392	1e-05	1e-05	1e-05	1e-05	0.151284	1e-05	1e-05	1e-05	1e-05	1e-05	1e-05	1e-05	0.109865	1e-05	1e-05	1e-05	3.27432	2.46533	1e-05
AGO4	0.0339806	1e-05	1e-05	1e-05	1e-05	1e-05	1e-05	1e-05	1e-05	1e-05	1e-05	1e-05	1e-05	1e-05	1e-05	1e-05	1e-05	0.0356535	0.157281	1e-05	1e-05	1e-05	1e-05	1e-05	1e-05	1e-05	1e-05	1e-05	1e-05	1e-05	1e-05	1e-05	1e-05	1e-05	1e-05	1e-05	1e-05	1e-05	1e-05	1e-05	1e-05	1e-05	1e-05	1e-05	1e-05	1e-05	1e-05	1e-05	1e-05
AGPAT1	1e-05	1e-05	1e-05	1e-05	1e-05	1e-05	1e-05	1e-05	1e-05	1e-05	1e-05	1e-05	1e-05	1e-05	1e-05	1e-05	1e-05	1e-05	1e-05	1e-05	1e-05	0.52639	1e-05	1e-05	1e-05	1e-05	1e-05	1e-05	1e-05	1e-05	1e-05	1e-05	1e-05	1e-05	1e-05	1e-05	1e-05	1e-05	1e-05	1e-05	1e-05	1e-05	1e-05	1e-05	1e-05	1e-05	1e-05	1e-05	1e-05
AGPAT2	1e-05	1e-05	1e-05	1e-05	1e-05	1e-05	1e-05	1e-05	1e-05	1e-05	1e-05	1e-05	1e-05	1e-05	1e-05	1e-05	1e-05	1e-05	1e-05	1e-05	1e-05	1e-05	1e-05	1e-05	1e-05	1e-05	1e-05	1e-05	1e-05	1e-05	1e-05	1e-05	1e-05	1e-05	1e-05	1e-05	1e-05	1e-05	1e-05	1e-05	1e-05	1e-05	1e-05	1e-05	1e-05	1e-05	1e-05	1e-05	1e-05
AGPAT5	1e-05	1e-05	1e-05	1e-05	1e-05	1e-05	1e-05	1e-05	1e-05	1e-05	2.50685	1e-05	1e-05	1e-05	1e-05	1e-05	3.53626	6.40471	1e-05	1e-05	1e-05	1e-05	1e-05	1e-05	1e-05	1e-05	1e-05	6.74819	3.43545	1e-05	8.88941	1e-05	1e-05	1e-05	1.6476	1e-05	1e-05	1e-05	1e-05	4.70348	1e-05	1e-05	1e-05	1e-05	1e-05	1e-05	1e-05	1e-05	1e-05
AGPS	1e-05	0.556872	1e-05	1e-05	1e-05	1e-05	1e-05	0.0435158	1e-05	1e-05	1e-05	1e-05	1e-05	1e-05	1e-05	1e-05	1e-05	1e-05	1e-05	1e-05	1e-05	1e-05	1e-05	1e-05	1e-05	1e-05	0.743598	0.578406	0.266438	1e-05	0.381096	1e-05	1e-05	0.234008	1e-05	1e-05	0.277689	1e-05	1e-05	1e-05	1e-05	1e-05	1e-05	0.657822	1e-05	0.467596	1e-05	6.16345	1e-05
AGR2	7.5597	1.71493	2.47147	0.396309	1.64528	0.796956	0.967744	1.9425	0.831793	1.56447	9.68632	1.07651	2.01104	0.883936	1.0359	2.83899	22.6014	2.64175	2.47448	2.71629	0.847494	6.79115	1.01016	1.28401	2.08584	1.52807	14.6866	8.23036	2.09085	0.65231	1.11265	0.641213	1.45433	9.19174	2.60432	10.6489	15.2885	2.24401	2.31215	10.1625	1.74096	1.66181	26.6442	11.0133	10.442	4.20208	1.12586	0.807364	0.690375
AGR3	2.57399	3.02546	2.05452	2.73103	2.17674	2.20516	1.3015	1.05815	2.44457	2.60873	3.59112	1.02726	3.85265	2.56705	3.04357	1.38834	4.78256	7.35383	2.71	159.965	2.14713	1.64039	28.7568	2.51518	1.92681	1.00824	2.27028	1.86065	2.69518	7.29343	2.67653	2.5287	14.1397	0.939579	2.51478	8.37286	3.86257	4.27059	2.3169	2.40633	23.3497	2.8638	45.371	1.88713	1.63383	13.3288	19.1417	2.9094	17.4207
AGRN	0.112024	0.191643	0.137699	0.0247519	0.329737	0.154525	0.337347	0.233208	0.104726	0.0727455	0.0801327	0.114266	0.0350265	0.193927	0.157553	0.134911	0.0308445	0.10835	1.2825	0.182564	0.0526545	0.156911	0.0679982	0.216059	0.271715	0.199726	0.0214925	0.00693119	0.151604	0.13059	0.109195	0.116437	0.0914308	0.368529	0.049153	0.0510737	0.0546805	0.0311304	0.0636644	0.0915155	0.143103	0.144943	0.153105	0.0336944	0.120248	0.308079	0.0113846	0.057634	0.241295
AGT	127.221	96.7569	226.221	117.883	220.329	377.698	168.962	172.81	143.394	136.905	261.023	92.7055	223.871	136.513	230.978	217.612	300.367	199.137	252.507	217.084	112.063	144.836	86.3012	118.448	201.895	134.069	115.374	141.512	150.93	118.864	170.382	178.284	301.762	251.727	166.996	107.845	195.809	130.391	290.791	186.335	224.125	114.632	171.325	113.165	229.798	134.656	150.512	169.826	194.228
AGTRAP	1e-05	1e-05	1e-05	1e-05	1e-05	1e-05	1e-05	1e-05	1e-05	1e-05	1e-05	1e-05	1e-05	1e-05	1e-05	1e-05	1e-05	1e-05	1e-05	1e-05	1e-05	1e-05	1e-05	2.15902	1e-05	1e-05	1e-05	1e-05	1e-05	1e-05	1e-05	0.612344	1e-05	1e-05	1e-05	1e-05	1e-05	1e-05	1e-05	1e-05	1e-05	1e-05	1e-05	1e-05	1e-05	1e-05	1e-05	1e-05	1e-05
AGXT	1e-05	1e-05	1e-05	0.173276	1e-05	1e-05	1e-05	1e-05	1e-05	1e-05	1e-05	1e-05	1e-05	1e-05	1e-05	1e-05	1e-05	1e-05	1e-05	1e-05	1e-05	1e-05	1e-05	1e-05	1e-05	1e-05	1e-05	1e-05	1e-05	1e-05	1e-05	1e-05	1e-05	1e-05	1e-05	1e-05	1e-05	1e-05	1e-05	1e-05	1e-05	1e-05	1e-05	1e-05	1e-05	1e-05	1e-05	1e-05	1e-05
AGXT2	1e-05	1e-05	1e-05	1e-05	1e-05	1e-05	1e-05	1e-05	1e-05	1e-05	1e-05	1e-05	1e-05	1e-05	1e-05	1e-05	1e-05	1e-05	0.185624	1e-05	1e-05	1e-05	1e-05	1e-05	1e-05	1e-05	1e-05	1e-05	1e-05	1e-05	1e-05	1e-05	1e-05	1e-05	1e-05	1e-05	1e-05	1e-05	1e-05	1e-05	1e-05	1e-05	1e-05	1e-05	1e-05	1e-05	1e-05	1e-05	1e-05
AHCTF1	1e-05	1e-05	1e-05	0.0712122	1e-05	1e-05	1e-05	1e-05	1e-05	1e-05	1e-05	1e-05	1e-05	1e-05	1e-05	1e-05	1e-05	1e-05	1e-05	1e-05	1e-05	1e-05	1.44436	1e-05	1e-05	1e-05	1e-05	1e-05	1e-05	1e-05	1e-05	1e-05	1e-05	1e-05	1e-05	1e-05	1e-05	1e-05	1e-05	1e-05	1e-05	1e-05	1e-05	1e-05	1e-05	1e-05	1e-05	1e-05	1e-05
AHCY	5.67831	0.940415	0.897881	1.60851	0.707168	3.13838	0.600712	0.942326	0.662411	2.54032	1.37163	0.868603	0.596971	1.48153	2.16258	0.517495	0.779364	0.579744	0.47722	0.187213	1.09885	1.30842	0.734251	0.216492	0.582504	1.5469	0.458925	0.981922	0.823236	1.27949	1.43079	0.43256	0.699749	0.392733	0.800755	0.5311	0.457061	0.939386	0.480823	1.13157	0.627864	0.795466	0.331006	0.4915	1.21173	1.23743	0.557709	2.11985	0.400853
AHCYL1	1e-05	1e-05	1e-05	1e-05	1e-05	1e-05	1e-05	1e-05	1e-05	0.112711	1e-05	1e-05	1e-05	1e-05	1e-05	1e-05	1e-05	1e-05	1e-05	1e-05	1e-05	1e-05	1e-05	0.127609	1e-05	1e-05	1e-05	2.46867	1e-05	0.0922096	1e-05	0.13271	1e-05	1e-05	0.0971716	1e-05	0.0393751	3.58925	1e-05	1e-05	1e-05	0.355949	1e-05	1e-05	1e-05	1e-05	1e-05	1e-05	1e-05
AHCYL2	1e-05	1e-05	1e-05	1e-05	1e-05	1e-05	0.13577	1e-05	1e-05	1e-05	1e-05	1e-05	1e-05	1e-05	1e-05	1e-05	1e-05	1e-05	1e-05	1e-05	1e-05	1e-05	1e-05	1e-05	1e-05	1e-05	1e-05	2.33523	1e-05	1e-05	1e-05	1e-05	1e-05	1e-05	0.0919191	1e-05	0.0372468	1e-05	1e-05	1e-05	1e-05	1e-05	1e-05	1e-05	1e-05	1e-05	1e-05	1e-05	1e-05
AHNAK	0.0364708	0.173158	0.098588	0.323331	0.19464	0.174566	1.78001	0.601221	0.238158	1.0693	0.389839	0.299075	0.11797	0.655034	0.2735	0.153009	0.536306	0.178888	0.143158	0.615752	0.235067	0.232304	0.651753	0.150413	0.30362	2.23684	2.60112	0.296842	0.356747	0.172246	1.14925	0.429734	0.593918	0.733357	0.177019	1.36308	0.397543	0.252813	0.661923	0.257866	0.14237	0.0718622	0.316334	0.358614	0.838671	0.503215	0.129515	0.682609	0.554167
AHNAK2	2.2596	2.54952	2.76675	2.65573	1.29578	2.66382	2.68614	0.0423501	2.63341	2.56695	2.91754	2.77789	0.0199509	2.55032	2.77399	2.61719	0.028893	2.79442	0.0196807	3.35844	2.81914	0.0241119	2.84351	2.27011	2.75609	2.42879	2.58847	0.0120052	2.741	2.70796	2.73757	2.865	0.0137043	2.42704	2.97561	2.51193	3.02486	2.71306	0.107449	2.7388	2.39571	2.62712	0.0167619	0.00841079	2.38399	0.0102217	1.15187	0.0383864	0.0369593
AHR	2.30669	1.99536	2.15393	1.14579	1.71894	3.56893	1.73016	1.42279	2.85525	2.53981	2.66957	2.3915	2.80052	2.40176	4.02526	3.41463	2.48418	2.30894	3.07606	1.35157	3.46501	1.79713	2.44896	1.32318	2.1609	1.41827	2.20124	2.22297	1.76632	2.90987	2.66353	1.99246	2.19553	2.32592	2.60513	2.52433	2.84682	0.956838	1.89955	2.73198	1.69483	3.0724	2.28939	2.59104	2.5019	2.78508	1.57825	2.08283	2.16344
AHSA1	0.122309	1e-05	1e-05	1e-05	6.56079	2.80586	1e-05	1e-05	1e-05	0.418058	1e-05	1e-05	6.20988	15.4189	1e-05	0.124113	1e-05	1e-05	1e-05	1e-05	0.504489	1e-05	0.124795	1e-05	1e-05	5.60132	1e-05	0.255563	1e-05	1e-05	1e-05	1e-05	5.60565	1e-05	1e-05	1e-05	1e-05	1e-05	1e-05	1e-05	1e-05	1e-05	1e-05	1e-05	2.08658	1e-05	1e-05	7.96655	1e-05
AHSG	699.562	194.65	208.218	715.116	235.388	224.887	171.399	674.874	281.108	239.191	198.818	174.254	202.026	170.365	264.04	197.172	210.312	866.553	184.935	154.529	752.123	811.012	236.419	635.544	260.68	190.581	714.496	280.237	238.268	497.326	881.553	132.541	153.176	775.521	618.671	161.071	142.901	202.847	224.527	204.417	220.176	186.012	979.118	189.664	612.312	282.939	800.75	765.143	283.204
AHSP	1e-05	1e-05	1e-05	1e-05	1e-05	1e-05	2.53377	1e-05	1e-05	1e-05	1e-05	1e-05	1e-05	1e-05	1.48942	1e-05	1e-05	1e-05	1e-05	1e-05	1e-05	1e-05	1e-05	0.866069	1e-05	1e-05	1e-05	0.174394	1e-05	1e-05	1.66501	0.30057	1e-05	0.567169	1e-05	3.58414	1e-05	1e-05	1e-05	1e-05	1e-05	1e-05	1e-05	1e-05	1e-05	1e-05	1e-05	1e-05	0.736864
AIDA	1e-05	1e-05	1e-05	1e-05	1e-05	1e-05	1e-05	1e-05	1e-05	1e-05	1e-05	1e-05	1e-05	1e-05	1e-05	1e-05	1e-05	1e-05	1e-05	1e-05	1e-05	1e-05	1e-05	1e-05	1e-05	1e-05	1e-05	1e-05	1e-05	1e-05	1e-05	0.151156	1e-05	1e-05	1e-05	1e-05	1e-05	1e-05	1e-05	1e-05	1e-05	1e-05	1e-05	1e-05	1e-05	1e-05	1e-05	1e-05	1e-05
AIF1	0.0568519	1e-05	1e-05	1e-05	1e-05	1e-05	1e-05	1e-05	1e-05	1e-05	1e-05	1e-05	0.940937	1e-05	1e-05	1e-05	1e-05	1.41342	1e-05	1.9996	1e-05	1.2618	1e-05	0.947266	1e-05	1e-05	0.317919	1e-05	1e-05	1e-05	5.94713	1e-05	1e-05	1e-05	1e-05	1e-05	1e-05	2.15592	1e-05	1e-05	1e-05	1e-05	1e-05	1.2929	1e-05	1e-05	1e-05	1e-05	1e-05
AIF1L	1e-05	1e-05	1e-05	1e-05	1e-05	1e-05	1e-05	1e-05	1e-05	1e-05	1e-05	1e-05	1e-05	1e-05	1e-05	1e-05	1e-05	1e-05	1e-05	1e-05	1e-05	1e-05	1e-05	1e-05	1e-05	1e-05	1e-05	1e-05	1e-05	1e-05	1e-05	1e-05	1e-05	1e-05	1e-05	1e-05	1e-05	1e-05	1e-05	1e-05	1e-05	1e-05	1e-05	1e-05	1e-05	1e-05	1e-05	1e-05	1e-05
AIFM1	1e-05	1e-05	0.332012	1e-05	1e-05	1e-05	1e-05	1e-05	0.224849	0.0983325	1e-05	1e-05	1e-05	1e-05	1e-05	1e-05	1e-05	1e-05	1e-05	1e-05	1e-05	1e-05	1e-05	1e-05	1e-05	1e-05	1e-05	1e-05	2.18282	1e-05	1e-05	1e-05	1e-05	1e-05	1e-05	1e-05	1e-05	1e-05	1e-05	0.336957	1e-05	0.0519393	1e-05	0.0485902	0.914735	1e-05	1e-05	1e-05	1.8215
AIFM2	1e-05	1e-05	1e-05	1e-05	1e-05	1e-05	1e-05	1e-05	1e-05	1e-05	1e-05	1e-05	1e-05	1e-05	1e-05	1e-05	1e-05	1e-05	1e-05	1e-05	1e-05	1e-05	1.54421	1e-05	1e-05	1e-05	1e-05	1e-05	1e-05	1e-05	1e-05	1e-05	1e-05	1e-05	1e-05	1e-05	1e-05	1e-05	1e-05	1e-05	1e-05	1e-05	1e-05	1e-05	1e-05	1e-05	1e-05	1e-05	1e-05
AIG1	1e-05	1e-05	1e-05	1e-05	1e-05	1e-05	1e-05	1e-05	1e-05	1e-05	1e-05	1e-05	1e-05	1e-05	1e-05	1e-05	1e-05	1e-05	1e-05	1e-05	1e-05	1e-05	1e-05	1e-05	1e-05	1e-05	1e-05	1e-05	1e-05	1e-05	1e-05	1e-05	1e-05	1e-05	1e-05	1e-05	1e-05	1e-05	1e-05	1e-05	1e-05	1e-05	1e-05	1e-05	1e-05	1e-05	1e-05	1e-05	1e-05
AIM2	1e-05	1e-05	1e-05	1e-05	1e-05	1e-05	1e-05	1e-05	1e-05	1e-05	1e-05	1e-05	1e-05	1e-05	1e-05	1e-05	1e-05	1e-05	1e-05	1e-05	1e-05	1e-05	1e-05	1e-05	1e-05	1e-05	1e-05	1e-05	1e-05	1e-05	1e-05	1e-05	1e-05	1e-05	1e-05	1e-05	1e-05	1e-05	1e-05	1e-05	1e-05	1e-05	1e-05	1e-05	1e-05	1e-05	1e-05	1e-05	1e-05
AIMP1	1e-05	1e-05	1e-05	1e-05	1e-05	1e-05	1e-05	1e-05	1e-05	1e-05	1e-05	1e-05	1e-05	1e-05	1e-05	1e-05	1e-05	1e-05	1e-05	1e-05	1e-05	1e-05	1e-05	1e-05	1e-05	1.71126	1e-05	1e-05	1e-05	1e-05	1e-05	1e-05	1e-05	1e-05	1e-05	1e-05	1e-05	1e-05	1.11223	1e-05	1e-05	1e-05	1e-05	1e-05	1e-05	1e-05	1e-05	1e-05	1e-05
AIMP2	1e-05	1e-05	1e-05	1e-05	1e-05	1e-05	1e-05	1e-05	1e-05	1e-05	0.434801	1e-05	1e-05	1e-05	0.326331	1e-05	1e-05	1e-05	1e-05	1e-05	1e-05	1e-05	1e-05	1e-05	1e-05	1e-05	1e-05	1e-05	1e-05	1e-05	1e-05	1e-05	1e-05	1e-05	1e-05	1e-05	1e-05	1e-05	1e-05	1e-05	1e-05	1e-05	1e-05	1e-05	0.142889	1e-05	1e-05	1e-05	1e-05
AIP	1.06233	3.97733	0.738153	0.4099	0.487538	0.606602	2.85486	2.22699	0.0358004	0.514191	0.894925	0.336286	0.58543	2.5794	0.183519	2.58162	4.04348	2.80424	3.50821	0.62232	1.20295	0.327075	2.85108	0.892703	3.34828	0.692397	0.0605421	0.114266	0.0979442	0.801346	0.915429	0.511401	0.775007	1.79012	0.28653	0.108347	0.946652	1.56648	1.60506	0.155416	0.523047	0.0813198	0.776987	2.70318	1.88121	0.787357	2.50174	1.76427	1.06107
AK1	2.2596	0.698518	2.76675	2.10865	2.58907	2.66382	2.68614	1.63314	0.220045	2.56695	0.403945	2.77789	2.71377	2.55032	0.170989	2.61719	0.234209	2.79442	2.58955	3.35844	2.81914	2.55642	0.139818	2.27011	2.75609	1.65001	2.58847	2.18271	2.741	2.70796	1.43308	2.865	2.52944	2.42704	1.71092	2.51193	2.68631	2.71306	2.51576	0.557642	2.39571	2.62712	2.8486	2.34706	2.38399	0.773483	0.494857	0.966536	2.94865
AK2	5.81362	1.43371	2.76675	5.75131	2.58907	0.0446308	2.32897	2.46211	2.63341	2.8351	4.68789	2.77789	2.24132	2.55032	4.09022	4.31635	2.88042	2.79442	2.58955	1.08539	2.81914	2.41349	2.84351	0.133063	2.75609	2.42879	0.132697	2.65759	2.741	2.70796	2.73757	2.865	2.52944	2.42704	2.81683	2.51193	3.02486	10.5547	4.87367	2.7388	1.31296	2.62712	2.8486	0.032673	2.38399	2.91661	2.94751	2.62817	2.94865
AK3	1e-05	1e-05	1e-05	1e-05	1e-05	1e-05	1e-05	1e-05	1e-05	1e-05	1e-05	1e-05	1e-05	1e-05	1e-05	1e-05	1e-05	0.228912	0.455882	1e-05	0.760895	1e-05	1e-05	1e-05	1e-05	1e-05	1e-05	1e-05	1e-05	1e-05	1e-05	1e-05	1e-05	1e-05	1e-05	1e-05	1e-05	1e-05	1.65738	2.1849	1e-05	1e-05	1e-05	0.817383	1e-05	1e-05	1e-05	1e-05	1.16033
AK4	1e-05	1e-05	1e-05	7.38384	1e-05	1e-05	1e-05	1e-05	1e-05	1e-05	1e-05	4.71249	1e-05	1e-05	1e-05	1e-05	1e-05	1e-05	1e-05	1e-05	1e-05	1e-05	1e-05	1e-05	1e-05	4.35223	1e-05	1e-05	1e-05	1e-05	1e-05	1e-05	1e-05	1e-05	1e-05	1e-05	1e-05	1e-05	1e-05	1e-05	1e-05	1e-05	1e-05	1e-05	1e-05	0.124279	0.335895	1e-05	1e-05
AK5	1e-05	1e-05	1e-05	1e-05	1e-05	1e-05	1e-05	1e-05	1e-05	1e-05	1e-05	1e-05	1e-05	1e-05	1e-05	1e-05	1e-05	1e-05	1e-05	1e-05	1e-05	1e-05	0.0635538	1e-05	1e-05	1e-05	1e-05	1e-05	1e-05	1e-05	1e-05	1e-05	1e-05	1e-05	1e-05	1e-05	1e-05	1e-05	1e-05	1e-05	1e-05	1e-05	1e-05	1e-05	1e-05	0.101442	0.224935	1e-05	1e-05
AK6	1e-05	1e-05	1e-05	1e-05	1e-05	1e-05	1e-05	1e-05	1e-05	1e-05	1e-05	1e-05	1e-05	1e-05	1e-05	1e-05	1e-05	1e-05	1e-05	1e-05	1e-05	1e-05	1e-05	1e-05	1e-05	1e-05	1e-05	1e-05	1e-05	1e-05	1e-05	1e-05	1e-05	1e-05	1e-05	1e-05	1e-05	1e-05	1e-05	1e-05	1e-05	1e-05	1e-05	1e-05	1e-05	1e-05	1e-05	1e-05	1e-05
AKAP1	1e-05	1e-05	1e-05	1e-05	1e-05	1e-05	1e-05	1e-05	1e-05	1e-05	1e-05	2.27909	1e-05	1e-05	1e-05	1e-05	1e-05	1e-05	1e-05	3.53558	1e-05	1e-05	1e-05	1e-05	1e-05	1e-05	1e-05	1e-05	1e-05	1e-05	1e-05	1e-05	1e-05	1e-05	1e-05	1e-05	1e-05	1e-05	1e-05	1e-05	1e-05	1e-05	1e-05	1e-05	1e-05	1e-05	1e-05	1e-05	1e-05
AKAP11	1e-05	1e-05	1e-05	1e-05	1e-05	1e-05	1e-05	1e-05	1e-05	1e-05	1e-05	1e-05	1e-05	1e-05	1e-05	1e-05	1e-05	1e-05	1e-05	1e-05	1e-05	1e-05	1e-05	1e-05	1e-05	1e-05	1e-05	1e-05	1e-05	1e-05	1e-05	1e-05	1e-05	1e-05	1e-05	1e-05	1e-05	1e-05	1e-05	1e-05	1e-05	1e-05	1e-05	1e-05	1e-05	1e-05	1e-05	1e-05	1e-05
AKAP12	1e-05	1e-05	1e-05	1e-05	1e-05	1e-05	1e-05	1e-05	1e-05	0.137215	1e-05	1e-05	1e-05	1e-05	1e-05	1e-05	1e-05	1e-05	1e-05	1e-05	1e-05	21.3112	1e-05	1e-05	1e-05	1e-05	0.0851408	1e-05	1e-05	1e-05	1e-05	1e-05	1e-05	1e-05	1e-05	1e-05	1e-05	1e-05	1e-05	1e-05	1e-05	0.0332525	1e-05	1e-05	1e-05	2.96583	1e-05	1e-05	1e-05
AKAP13	1e-05	1e-05	1e-05	1e-05	1e-05	0.0195689	1e-05	1e-05	1e-05	1e-05	1e-05	1e-05	1e-05	1e-05	0.0531956	1e-05	1e-05	1e-05	1e-05	1e-05	0.037097	1e-05	1e-05	1e-05	1e-05	1e-05	0.124653	1e-05	0.0301409	1e-05	1e-05	1e-05	1e-05	1e-05	1e-05	1e-05	1e-05	1e-05	1e-05	0.0948296	1e-05	1e-05	1e-05	1e-05	1e-05	1e-05	1e-05	1e-05	1e-05
AKAP17A	1e-05	1e-05	1e-05	1e-05	1e-05	1e-05	1.37292	1e-05	1e-05	1.18864	1e-05	1e-05	1e-05	1e-05	1e-05	1e-05	1e-05	1e-05	1e-05	1e-05	1e-05	1e-05	1e-05	1e-05	1e-05	0.868971	1e-05	1e-05	1.17283	1e-05	1e-05	1e-05	1e-05	1e-05	1e-05	1e-05	1.052	1e-05	1e-05	1e-05	1e-05	1e-05	1e-05	1.17758	1e-05	1e-05	1e-05	0.935856	1e-05
AKAP5	1e-05	1e-05	1e-05	1e-05	1e-05	1e-05	1e-05	1e-05	1e-05	1e-05	1e-05	1e-05	1e-05	1e-05	1e-05	1e-05	1e-05	1e-05	1e-05	1e-05	1e-05	1e-05	1e-05	1e-05	1e-05	1e-05	1e-05	1e-05	1e-05	1e-05	1e-05	1e-05	1e-05	1e-05	1e-05	1e-05	1e-05	1e-05	1e-05	1e-05	1e-05	1e-05	1e-05	1e-05	1e-05	1e-05	1e-05	1e-05	1e-05
AKAP8	1e-05	1e-05	1e-05	1e-05	1e-05	1e-05	1e-05	1e-05	1e-05	1e-05	1e-05	1e-05	1e-05	1e-05	1e-05	1e-05	1e-05	1e-05	1e-05	1e-05	1e-05	1e-05	1e-05	1e-05	1e-05	1e-05	1e-05	1e-05	1e-05	1e-05	1e-05	1e-05	1e-05	1e-05	1e-05	1e-05	1e-05	1e-05	1e-05	1e-05	1e-05	1e-05	1e-05	1e-05	1e-05	1e-05	1e-05	1e-05	0.15329
AKAP8L	1e-05	1e-05	1e-05	1e-05	1e-05	1e-05	1e-05	1e-05	1e-05	1.94235	1e-05	1e-05	1e-05	1e-05	1e-05	1e-05	1e-05	0.0647717	1e-05	1e-05	1e-05	1e-05	0.110779	1e-05	1e-05	1e-05	1e-05	1e-05	1e-05	1e-05	1e-05	1e-05	1e-05	1e-05	1e-05	0.0503689	1e-05	1e-05	1e-05	1e-05	1e-05	1e-05	1e-05	1e-05	1e-05	1e-05	1e-05	1e-05	1e-05
AKAP9	0.0203055	0.191769	0.0295804	0.17511	0.0289447	0.174317	0.0599284	0.041229	0.038595	0.127538	0.149592	0.0148383	0.153026	0.107522	0.131563	0.175723	0.193341	0.112291	0.114418	0.224728	0.138471	0.170933	0.0206517	0.0843622	0.135134	0.0680302	0.158051	0.159742	0.0359269	0.168301	0.0316676	0.159904	0.156932	0.0800828	0.125539	0.0962731	0.216667	0.0371735	0.186637	0.144077	0.170168	0.0258988	0.0667267	0.157279	0.107531	0.0205427	0.067559	0.00697473	0.0596976
AKNA	1e-05	1e-05	1e-05	1e-05	1e-05	1e-05	1e-05	1e-05	1e-05	1e-05	1e-05	1e-05	1e-05	1e-05	1e-05	1e-05	1e-05	1e-05	1e-05	1e-05	1e-05	1e-05	1e-05	1e-05	1e-05	1e-05	1e-05	1e-05	1e-05	1e-05	1e-05	1e-05	1e-05	1e-05	1e-05	1e-05	1e-05	1e-05	1e-05	1e-05	1e-05	1e-05	1e-05	1e-05	1e-05	1e-05	1e-05	1e-05	1e-05
AKR1A1	0.277883	0.561059	0.738955	0.130195	0.22726	0.510438	0.427874	0.294512	0.241707	0.443758	0.377206	0.403604	0.519838	0.726908	0.490339	0.237793	0.361221	1.14436	0.38691	0.326906	0.229554	0.751373	0.28561	0.410492	0.253727	0.356156	0.224312	0.320222	0.295607	0.401324	0.454413	0.324558	0.32505	0.339938	0.630414	1.29071	0.474007	0.463114	0.38498	0.386832	0.749225	0.756507	1.83067	0.694892	0.199646	0.515559	0.147523	0.49632	0.456472
AKR1B1	18.1306	23.4264	13.6222	25.982	17.9655	14.8997	25.9347	17.9853	18.1364	30.8256	30.5668	33.8728	20.6728	20.9245	24.9291	32.1923	22.8588	17.567	18.0453	14.9758	14.8105	24.602	31.3726	17.5283	15.7093	25.5881	14.2365	30.1582	30.1723	34.3393	16.7532	18.813	27.9613	20.8713	22.6875	17.1824	24.0193	29.9124	19.811	35.3201	32.714	20.2586	20.6384	23.6855	19.9668	29.1523	26.5047	28.2537	35.2658
AKR1B10	0.204518	0.645518	0.860369	0.69789	0.751897	0.22914	0.502137	0.854089	0.938165	0.398757	0.758179	0.819894	0.887659	0.773803	0.638676	1.35785	0.633978	0.9341	0.404538	0.72679	0.759327	0.939955	1.04252	0.147545	0.886662	0.590129	0.305187	0.884585	0.810256	1.0962	0.890278	0.511527	0.658522	0.876129	0.60953	0.933751	0.491795	0.744805	0.864802	0.778405	1.1124	1.01	0.992033	0.694695	0.801557	1.20735	1.40226	0.612425	0.882165
AKR1B15	0.214743	0.733213	0.917997	0.732785	0.789491	0.540299	0.51404	0.748019	0.985074	0.418695	0.876262	1.0659	0.938831	0.812493	0.670609	1.42574	0.665677	0.853801	0.624233	0.628599	0.797293	0.839637	1.09465	0.154922	1.16951	0.698468	0.507466	0.903436	0.868958	1.15101	0.834426	0.537103	0.691448	0.919935	0.753534	0.980439	0.793587	0.688113	0.908042	0.872257	1.16802	1.0605	1.09115	0.825365	0.84439	1.26771	1.47237	0.643046	0.926274
AKR1C1	1e-05	1e-05	1e-05	1e-05	1e-05	1e-05	1e-05	1e-05	0.658144	1e-05	1e-05	1e-05	1e-05	1e-05	1e-05	1e-05	1e-05	0.0126339	1e-05	1e-05	1e-05	1e-05	0.0478725	1e-05	1e-05	1e-05	1e-05	1e-05	1e-05	1e-05	1e-05	1e-05	1e-05	1e-05	1e-05	0.140465	1e-05	1e-05	0.327168	1e-05	1e-05	1e-05	1e-05	1e-05	1e-05	1e-05	0.602259	1e-05	1e-05
AKR1C2	2.96447	0.202354	1.08822	0.93895	1.80991	3.44579	3.26456	2.65872	2.99073	2.71479	4.2216	2.72075	2.55269	5.05204	6.91125	5.54727	5.58041	0.0132355	1.90282	2.41007	2.21179	3.02625	0.0501521	2.12642	2.3582	1.39042	3.04886	3.18877	1.1096	2.82168	4.27817	3.09972	3.31031	4.00435	1.93237	0.147154	3.47834	0.923411	2.66431	1.24161	0.366169	4.12387	2.51804	2.73837	2.60704	1.89785	2.61199	2.48212	1.78143
AKR1C3	0.487841	0.112749	0.814423	0.217911	0.0760083	0.870946	1.06642	2.27501	0.658144	0.349145	0.802178	0.193771	2.08996	2.49164	1.2197	2.24647	2.05889	0.950987	0.882129	0.073496	0.691865	0.0313314	0.189694	0.434738	0.805769	2.26028	0.779712	1.15041	1.04058	0.628661	0.169818	0.636619	0.383106	0.485965	0.409441	0.140465	0.703574	1.79468	0.407814	0.042155	0.737982	0.68896	0.857212	0.821453	1.02438	0.679329	0.602259	0.728407	0.556593
AKR1C4	2.2596	2.54952	2.76675	2.65573	2.58907	2.66382	0.22349	2.46211	0.658144	2.56695	2.91754	2.77789	2.71377	2.55032	2.77399	0.184813	2.88042	2.79442	0.0654384	0.236528	2.81914	0.121704	0.0478725	2.27011	2.75609	2.42879	2.58847	0.170215	2.741	2.70796	0.0928435	0.110433	2.52944	2.42704	2.97561	2.51193	3.02486	2.71306	0.327168	2.7388	0.296735	2.62712	0.094955	2.36968	2.38399	2.91661	0.602259	0.195093	2.94865
AKR7A2	2.73542	3.21506	19.1183	4.03329	6.82251	18.6051	21.0187	0.0949341	0.0863118	22.2592	4.17576	0.0731055	5.05192	5.83208	6.15385	2.66537	3.97032	0.381035	1.53151	18.2119	15.642	3.1994	0.233719	15.6536	1.39251	19.3708	21.3846	19.6062	22.0618	8.19195	4.04333	11.6616	6.29141	2.63748	6.74304	30.0545	0.114742	1.99893	1.08807	6.00359	2.98842	4.51543	2.30848	6.33736	0.606618	0.0645627	0.823894	19.6846	1.68401
AKR7A3	0.165192	1e-05	1e-05	1e-05	1e-05	1e-05	1e-05	3.54658	0.0464305	1e-05	1e-05	1e-05	9.02106	1e-05	7.24054	1e-05	1e-05	1e-05	3.89595	1e-05	0.319637	1e-05	1e-05	1e-05	1e-05	0.145913	1e-05	0.833317	1e-05	1e-05	1e-05	1e-05	0.125726	1e-05	32.0193	71.5947	1e-05	1e-05	1e-05	1e-05	1e-05	1e-05	1e-05	1e-05	1e-05	65.0229	1e-05	72.6944	1.3186
AKR7L	0.165192	1e-05	1e-05	1e-05	1e-05	1e-05	1e-05	3.54658	0.0464305	1e-05	1e-05	1e-05	9.02106	1e-05	7.24054	1e-05	1e-05	1e-05	3.89595	1e-05	1e-05	1e-05	1e-05	1e-05	1e-05	0.145913	1e-05	0.0727075	1e-05	1e-05	1e-05	1e-05	0.125726	1e-05	32.0193	71.5947	1e-05	1e-05	1e-05	1e-05	1e-05	1e-05	1e-05	1e-05	1e-05	64.9285	1e-05	72.6944	1.3186
AKT1	1e-05	1e-05	1e-05	1e-05	1e-05	1e-05	1e-05	1e-05	1e-05	1e-05	1e-05	1e-05	1e-05	1e-05	1e-05	1e-05	1e-05	1e-05	1e-05	1e-05	1e-05	1e-05	1e-05	1e-05	1e-05	1e-05	1e-05	1e-05	1e-05	1e-05	1e-05	1e-05	1e-05	1e-05	1e-05	1e-05	1e-05	1e-05	1e-05	1e-05	1e-05	1e-05	1e-05	1e-05	1e-05	1e-05	1e-05	1e-05	1e-05
AKT2	1e-05	1e-05	1e-05	1e-05	1e-05	1e-05	1e-05	1e-05	1e-05	1e-05	1e-05	1e-05	1e-05	1e-05	1e-05	1e-05	1e-05	1e-05	1e-05	1e-05	1e-05	1e-05	1e-05	1e-05	1e-05	1e-05	1e-05	1e-05	1e-05	1e-05	1e-05	1e-05	1e-05	1e-05	1e-05	1e-05	1e-05	1e-05	1e-05	1e-05	1e-05	1e-05	1e-05	1e-05	1e-05	1e-05	1e-05	1e-05	1e-05
AKT3	1e-05	1e-05	1e-05	1e-05	1e-05	1e-05	1e-05	1e-05	1e-05	1e-05	1e-05	1e-05	1e-05	1e-05	1e-05	1e-05	1e-05	1e-05	1e-05	1e-05	1e-05	1e-05	1e-05	1e-05	1e-05	1e-05	1e-05	1e-05	1e-05	1e-05	1e-05	1e-05	1e-05	1e-05	1e-05	1e-05	1e-05	1e-05	1e-05	1e-05	1e-05	1e-05	1e-05	1e-05	1e-05	1e-05	1e-05	1e-05	1e-05
AKTIP	1e-05	1e-05	0.474816	1e-05	1e-05	1e-05	1.02274	0.555168	1e-05	1e-05	1e-05	0.280595	0.0253706	1e-05	1e-05	1e-05	1e-05	0.876038	0.122782	1e-05	1e-05	1e-05	0.270091	1e-05	0.563857	1e-05	1e-05	1e-05	1e-05	1e-05	0.103477	1e-05	0.539959	0.698658	1e-05	1e-05	1e-05	0.562647	0.651907	1e-05	1e-05	1e-05	1e-05	0.964216	1e-05	1e-05	1e-05	1e-05	1e-05
ALAD	2.2596	2.25679	1.0614	2.65573	2.58907	2.66382	1.33468	1.2231	0.659893	2.56695	1.49961	1.25221	2.71377	2.55032	2.77399	2.61719	2.88042	2.79442	2.58955	3.35844	2.81914	2.55642	2.84351	1.07706	2.75609	2.42879	2.58847	0.610986	2.741	2.70796	2.73757	0.629708	2.52944	0.568712	2.97561	2.51193	0.0634723	2.71306	2.51576	2.7388	2.39571	2.62712	2.8486	1.36786	2.38399	0.156542	2.77519	2.62817	2.94865
ALB	8847.05	10296.1	10269.8	9393.92	9015.86	10029.9	9454.25	8422.96	10628.1	9508.9	10822.8	10626.6	10184.4	8811.07	11237.8	9492.16	9958.4	10188.7	9654.6	10409.2	8893.6	8774.47	10539.5	7975.9	9135.39	9919.03	8898.92	10178.8	9406.11	9513.61	10288.1	10184.8	8901.5	9412.97	12425.1	7046.48	11786.9	9552.87	10284.1	9585.88	9534.23	9141.72	10424.6	8943.36	8534.42	9924.32	9588.54	9637.91	11230.3
ALCAM	0.2042	1.06085	0.273439	0.686065	0.145429	0.329764	0.212093	0.189793	0.217094	0.12168	0.235369	0.126076	0.282052	0.123352	1.07361	1.87071	0.240888	0.337132	0.364278	0.756016	0.111454	0.424453	0.0634392	0.307127	0.18884	0.0545091	0.213784	0.396139	0.256175	0.0940254	0.32987	0.320432	0.317576	0.15879	0.222697	0.20951	0.233847	0.021282	0.19277	0.287936	0.119807	0.139976	0.218908	0.133991	0.241006	0.184732	0.2319	0.189627	0.111574
ALDH16A1	1e-05	1e-05	1e-05	1e-05	1e-05	1e-05	1e-05	1e-05	1e-05	1e-05	1e-05	1e-05	1e-05	1e-05	1e-05	1e-05	1e-05	1e-05	1e-05	1e-05	1e-05	1e-05	1e-05	1e-05	1e-05	0.0602677	0.244256	1e-05	1e-05	1e-05	1e-05	1e-05	1e-05	1e-05	1e-05	1e-05	0.0382306	1e-05	1e-05	1e-05	1e-05	1e-05	1e-05	1e-05	1e-05	1e-05	1e-05	1e-05	1e-05
ALDH18A1	1e-05	1e-05	1e-05	1e-05	1e-05	1e-05	1e-05	1e-05	1e-05	0.229328	1e-05	1e-05	0.104425	0.268662	1e-05	1e-05	1e-05	1e-05	1e-05	0.329829	1e-05	1e-05	1e-05	1e-05	1e-05	1e-05	1e-05	1e-05	1e-05	0.180917	1e-05	1e-05	1e-05	1e-05	1e-05	1e-05	1e-05	0.01781	1e-05	1e-05	1e-05	1e-05	1e-05	1e-05	1e-05	1e-05	1e-05	1e-05	1e-05
ALDH1A1	2.54026	1.08833	2.94201	4.32382	0.263316	2.25225	1.43031	0.0430375	1.82142	0.785033	2.68755	3.44845	4.60217	15.9407	1.89581	4.52157	2.9566	2.92305	9.06876	3.78812	2.62818	3.48922	1.28188	2.82209	2.53515	3.3408	2.12089	2.97854	2.38532	2.73744	0.060541	0.456579	2.35039	0.173707	4.26773	1.72256	2.94489	0.256267	1.62125	3.13177	1.68657	3.02516	12.3376	3.8507	2.81681	1.06869	2.52187	0.930533	4.81522
ALDH1A2	2.01259	0.979498	2.64781	3.43399	0.117928	2.02703	1.28728	0.5653	1.38829	0.499333	2.1448	1.62744	3.09684	1.96058	1.70623	2.02699	2.66094	2.63075	2.67816	1.96285	2.12567	2.87026	0.549824	2.30201	1.876	2.21148	1.40873	2.68069	2.87694	2.35961	0.599878	0.997847	2.11535	1.15605	4.26219	1.36601	2.53839	0.119705	1.26921	1.86385	1.45805	2.25904	1.38949	2.99685	2.1509	0.719023	1.42151	0.616232	3.74514
ALDH1A3	1.78524	0.979498	2.64781	3.43399	0.7857	2.21493	1.28728	0.830072	1.38829	0.499333	2.1448	1.62744	3.00034	1.96058	1.70623	2.02699	2.66094	2.63075	2.4186	2.85161	2.12567	2.87026	0.549824	2.23919	2.22754	2.21148	2.3436	2.95622	2.22727	2.35961	0.952658	1.67671	2.11535	1.58518	3.84096	1.36601	2.53839	0.985438	1.40629	1.86385	1.45805	2.25904	1.8451	2.99685	2.45861	0.719023	1.69528	0.502441	3.74514
ALDH1B1	1.8468	1.01327	2.73911	9.80662	0.775183	2.09692	9.3642	0.747698	1.43616	0.516551	2.21875	1.68356	10.8924	2.02818	9.28047	2.09689	2.7527	2.72146	2.60557	3.08171	2.57139	2.96923	0.568783	2.90715	2.11207	2.28774	1.99227	2.97349	2.5197	2.44097	0.906976	1.60614	2.23745	1.51785	3.97341	1.41311	9.73453	1.1878	1.31298	1.92812	2.10526	2.33694	3.50053	3.10019	2.40572	0.743817	1.47052	0.0269887	3.87428
ALDH1L1	0.355478	0.765386	0.735189	0.481756	0.128782	0.502573	0.61744	0.343688	0.150297	0.321582	0.429923	0.305662	0.712262	0.781713	0.0500643	0.466183	0.52992	0.569183	0.4133	0.380104	0.463777	0.83053	0.658392	0.427557	0.405245	0.630741	0.443899	0.567955	0.370601	0.214595	0.464288	0.421521	0.392248	0.347297	0.419231	0.498606	0.334099	0.434831	0.286601	0.571645	0.497417	0.433127	0.407729	0.110251	0.360588	0.0812911	0.557522	0.299993	0.430851
ALDH1L2	1e-05	1e-05	0.0624358	1e-05	0.120857	1e-05	1e-05	1e-05	0.141048	1e-05	1e-05	1e-05	1e-05	1e-05	1e-05	1e-05	1e-05	1e-05	1e-05	1e-05	1e-05	1e-05	0.444737	1e-05	1e-05	1e-05	1e-05	1e-05	0.542174	1e-05	1e-05	1e-05	1e-05	1e-05	0.0540157	1e-05	1e-05	1e-05	1e-05	1e-05	1e-05	1e-05	1e-05	1e-05	1e-05	1e-05	1e-05	1e-05	1e-05
ALDH2	2.58606	1.77139	3.61504	3.67927	0.745803	4.43876	1.82643	0.150672	1.48745	2.86517	2.39264	2.72575	3.31944	2.19498	1.82811	2.17178	2.85101	2.81866	2.59136	1.99552	2.2775	4.39272	0.77469	2.39913	3.53032	2.8252	2.28129	3.69967	2.30013	3.59988	0.12134	1.26586	2.69293	1.51739	4.85364	1.46358	2.71971	1.97767	2.36443	1.99698	2.13479	2.4204	3.87656	3.24085	2.73655	1.11363	1.52304	0.572032	4.01265
ALDH3A1	1e-05	1e-05	1e-05	1e-05	1e-05	1e-05	1e-05	1e-05	1e-05	1e-05	1e-05	1e-05	1e-05	1e-05	1e-05	1e-05	1e-05	1e-05	1e-05	0.992627	4.3352	0.128927	3.78974	1e-05	1e-05	4.17759	1e-05	1e-05	1e-05	1e-05	1e-05	4.31817	1.6284	1e-05	1e-05	1e-05	1e-05	2.56448	2.7159	1e-05	2.94218	1e-05	1e-05	1e-05	2.17519	1e-05	3.73875	1e-05	1e-05
ALDH3A2	2.2596	2.54952	2.76675	2.65573	2.58907	2.66382	2.68614	2.46211	2.63341	0.0854395	2.91754	0.729051	2.71377	2.55032	2.77399	2.61719	2.88042	2.79442	2.58955	3.35844	4.3352	2.55642	3.70175	0.158056	0.565843	4.17759	2.58847	2.65759	2.741	2.70796	2.73757	4.80501	1.77521	0.208179	2.97561	2.51193	0.278717	2.56448	3.29347	0.0710782	2.94218	0.219098	2.8486	0.0864993	2.17519	2.91661	3.73875	0.299718	2.94865
ALDH3B1	1e-05	1e-05	1e-05	1e-05	1e-05	1e-05	1e-05	1e-05	1e-05	1e-05	1e-05	1e-05	1e-05	0.100337	1e-05	1e-05	1e-05	1e-05	1e-05	1e-05	4.16846	1e-05	3.55938	1e-05	1e-05	4.01691	1e-05	1e-05	1e-05	1e-05	1e-05	4.15208	1.56577	1e-05	1e-05	1e-05	1e-05	2.46585	2.61144	1e-05	2.82902	1e-05	1e-05	1e-05	2.09152	1e-05	3.59495	1e-05	1e-05
ALDH3B2	1e-05	1e-05	1e-05	1e-05	1e-05	1e-05	1e-05	1e-05	1e-05	1e-05	1e-05	1e-05	1e-05	1e-05	1e-05	1e-05	1e-05	1e-05	1e-05	1e-05	5.419	1e-05	4.62719	1e-05	1e-05	5.22199	1e-05	1e-05	1e-05	1e-05	1e-05	5.39771	2.0355	1e-05	1e-05	1e-05	1e-05	3.20561	3.39488	1e-05	3.67772	1e-05	1e-05	1e-05	2.71898	1e-05	4.67343	1e-05	1e-05
ALDH4A1	1e-05	1e-05	1e-05	1e-05	1e-05	0.092602	1e-05	1e-05	1e-05	1e-05	1e-05	1e-05	1e-05	1e-05	1.09837	1e-05	0.565649	0.935728	1.22138	4.00687	1e-05	1e-05	1e-05	1e-05	1e-05	1e-05	1e-05	1e-05	1e-05	1e-05	1e-05	1e-05	1e-05	1e-05	1e-05	1e-05	1e-05	1e-05	1e-05	1e-05	0.211584	1e-05	1e-05	1e-05	0.0210949	1e-05	0.736971	1e-05	1e-05
ALDH5A1	1e-05	1e-05	1e-05	1e-05	1e-05	1e-05	1e-05	1e-05	1e-05	1e-05	1e-05	0.0389113	0.640727	1e-05	1e-05	1e-05	0.495922	1e-05	1e-05	1e-05	1e-05	1e-05	1e-05	1e-05	1e-05	1e-05	1e-05	3.16827	1e-05	1e-05	1e-05	1e-05	1e-05	1e-05	4.24083	1e-05	5.4526	3.67268	1e-05	1e-05	2.79485	1e-05	1e-05	5.22065	1e-05	1e-05	1e-05	1e-05	1e-05
ALDH6A1	1e-05	1e-05	1e-05	1e-05	0.125906	1e-05	0.117482	8.5062	0.19567	0.0712666	1e-05	1e-05	1e-05	0.433818	1e-05	1e-05	1e-05	0.537992	1e-05	0.222722	1e-05	1e-05	1e-05	1e-05	1e-05	1e-05	1e-05	1e-05	1e-05	1e-05	0.104768	1e-05	1e-05	1e-05	1e-05	1e-05	1e-05	1e-05	11.1026	1e-05	1e-05	0.0909462	0.0404442	1e-05	1e-05	1e-05	1e-05	1e-05	1e-05
ALDH7A1	1e-05	1e-05	1e-05	1e-05	1e-05	1e-05	1e-05	1e-05	1e-05	0.387369	0.198142	1e-05	1e-05	0.442854	1e-05	1e-05	1e-05	1e-05	2.52933	1e-05	1e-05	1e-05	1e-05	0.119149	0.412672	1e-05	1e-05	0.0731186	1e-05	1e-05	0.132952	1e-05	1e-05	0.0570343	0.112792	1e-05	1e-05	1e-05	0.0727466	1e-05	1e-05	1e-05	0.123447	1e-05	0.382943	1e-05	1e-05	1e-05	1e-05
ALDH8A1	1e-05	1e-05	1e-05	1e-05	1e-05	1e-05	1e-05	1e-05	1e-05	1e-05	1e-05	1e-05	1e-05	1e-05	1e-05	1e-05	1e-05	1e-05	1e-05	1e-05	1e-05	1e-05	1e-05	1e-05	1e-05	1e-05	1e-05	1e-05	0.340646	0.328956	0.234151	1e-05	1e-05	1e-05	1e-05	1e-05	1e-05	1e-05	1e-05	1e-05	1e-05	1e-05	1e-05	1e-05	1e-05	1e-05	1e-05	1e-05	1e-05
ALDH9A1	22.7823	11.8892	9.1777	37.771	18.4707	41.7183	22.2012	51.2672	30.1607	20.0194	44.0907	42.7776	43.8989	0.69303	56.7946	0.0496575	52.6988	45.8598	39.4168	51.7317	14.9735	55.7186	18.0007	38.8753	71.8305	7.89747	8.61129	9.55432	0.189113	0.204208	0.873357	0.22705	21.1096	7.71817	27.0285	25.1891	25.4723	34.3816	35.2783	2.04108	5.4187	14.3702	60.6797	26.0279	0.1934	38.4446	32.6918	15.9927	32.3256
ALDOA	8.16313	11.5622	14.4461	9.07606	8.86236	13.1267	13.2087	24.0294	18.9127	12.6488	15.7974	29.4437	12.3923	12.2754	14.4463	16.9797	14.088	14.3478	15.1796	11.564	11.2025	7.38854	14.3935	9.32957	12.3791	9.18407	15.9577	17.0576	10.2542	9.75287	17.7954	31.0466	12.2656	9.25189	16.1041	4.66719	18.0338	12.7349	13.8418	9.6135	8.02334	9.42712	16.0748	13.9922	8.35366	10.6806	13.207	11.8773	13.3033
ALDOB	0.677961	1.75351	2.34535	1.53856	2.25778	0.807155	0.46434	0.385043	3.31816	0.855579	0.429496	1.133	1.68262	1.46467	2.84873	0.846163	0.469921	1.01445	5.4369	0.820084	1.08558	0.988177	0.701471	1.90999	0.572518	0.500985	0.744185	1.29804	1.18022	0.290526	1.24509	5.11945	2.43254	0.557982	0.871684	0.94084	0.220447	0.370426	0.639794	0.670486	1.05459	1.02765	4.17143	0.570573	0.218998	1.28678	0.988364	1.08165	0.916069
ALDOC	0.668301	0.660586	0.303985	1.50449	0.895822	0.755488	0.431057	0.33482	5.10617	0.470422	0.373475	13.7073	0.270838	0.112617	0.190122	0.608721	1.4056	4.23238	0.732806	0.895587	2.87908	1.89336	4.98593	0.309175	3.14157	0.319855	0.182628	0.382997	1.02628	0.90862	2.55672	0.467409	0.546341	0.485202	0.856926	0.121726	0.382905	0.257314	0.971599	0.119643	0.763064	0.419599	5.85501	0.49615	8.26694	0.430393	4.18315	0.120853	0.796582
ALG1	1e-05	1e-05	1e-05	1e-05	1e-05	2.90456	1e-05	1e-05	1e-05	1e-05	1e-05	1e-05	1e-05	1e-05	2.9036	1e-05	1e-05	1e-05	1e-05	1e-05	1e-05	2.00346	1e-05	1e-05	1e-05	1e-05	1e-05	1e-05	1e-05	1e-05	1e-05	1e-05	1e-05	1e-05	1e-05	1e-05	1e-05	1e-05	1e-05	1e-05	2.24038	1e-05	1e-05	1e-05	1e-05	1e-05	1e-05	1e-05	1e-05
ALG10	1e-05	1e-05	1e-05	1e-05	1e-05	1e-05	1e-05	1e-05	1e-05	1e-05	1e-05	1e-05	1e-05	1e-05	1e-05	1e-05	1e-05	1e-05	1e-05	1e-05	1e-05	1e-05	1e-05	1e-05	1e-05	1e-05	1e-05	1e-05	1e-05	1e-05	1e-05	1e-05	1e-05	1e-05	1e-05	1e-05	1e-05	1e-05	1e-05	1e-05	1e-05	1e-05	1e-05	0.0676285	1e-05	1e-05	1e-05	1e-05	1e-05
ALG10B	1e-05	1e-05	1e-05	1e-05	1e-05	1e-05	1e-05	1e-05	1e-05	1e-05	1e-05	1e-05	1e-05	1e-05	1e-05	1e-05	1e-05	1e-05	1e-05	1e-05	1e-05	1e-05	1e-05	1e-05	1e-05	1e-05	1e-05	1e-05	1e-05	1e-05	1e-05	1e-05	1e-05	1e-05	1e-05	1e-05	1e-05	1e-05	1e-05	1e-05	1e-05	1e-05	1e-05	0.0676285	1e-05	1e-05	1e-05	1e-05	1e-05
ALG11	0.650138	1e-05	1e-05	1.06381	0.499858	1e-05	1e-05	0.911298	1.22082	1e-05	0.966918	1e-05	1e-05	1.14797	1e-05	1e-05	1e-05	1e-05	1.57268	1e-05	1e-05	1e-05	1e-05	1e-05	0.918533	1e-05	1e-05	1e-05	0.648981	1e-05	1e-05	1e-05	0.519349	1e-05	1e-05	1e-05	1e-05	1e-05	1e-05	1e-05	1e-05	0.632779	1e-05	1e-05	1e-05	1e-05	1e-05	1e-05	1e-05
ALG12	1e-05	1e-05	1e-05	1e-05	1e-05	1e-05	1e-05	1e-05	1e-05	1e-05	1e-05	1e-05	1e-05	1e-05	1e-05	1e-05	1e-05	1e-05	1e-05	1e-05	1e-05	1e-05	1e-05	1e-05	1e-05	1e-05	1e-05	1e-05	1e-05	1e-05	1e-05	1e-05	1e-05	1e-05	1e-05	1e-05	1e-05	1e-05	1e-05	1e-05	1e-05	1e-05	1e-05	1e-05	1e-05	1e-05	1e-05	1e-05	1e-05
ALG13	1e-05	1e-05	1e-05	1e-05	1e-05	1e-05	1e-05	1e-05	1e-05	1e-05	1e-05	1e-05	1e-05	1e-05	1e-05	1e-05	1e-05	1e-05	1e-05	1e-05	1e-05	1e-05	1e-05	1e-05	1e-05	1e-05	1e-05	1e-05	1e-05	1e-05	1e-05	1e-05	1e-05	1e-05	1e-05	1e-05	1e-05	1e-05	1e-05	1e-05	1e-05	1e-05	1e-05	1e-05	1e-05	1e-05	1e-05	1e-05	1e-05
ALG14	1e-05	1e-05	1e-05	1e-05	1e-05	1e-05	1e-05	1e-05	1e-05	1e-05	1e-05	1e-05	1e-05	1e-05	1e-05	0.727216	1e-05	1e-05	1e-05	1e-05	1e-05	1e-05	1e-05	1e-05	1e-05	1e-05	1e-05	1e-05	1e-05	1e-05	1e-05	1.74205	1e-05	1e-05	1e-05	1e-05	1e-05	1e-05	1e-05	1e-05	1e-05	1e-05	1e-05	1e-05	1e-05	1e-05	1e-05	1e-05	1e-05
ALG2	1e-05	1e-05	1e-05	1e-05	1e-05	1e-05	1e-05	1e-05	1e-05	1e-05	1e-05	1e-05	1e-05	1e-05	1e-05	1e-05	1e-05	1e-05	1e-05	1e-05	1e-05	1e-05	1e-05	1e-05	1e-05	1e-05	1e-05	1e-05	1e-05	1e-05	1e-05	1e-05	1e-05	1e-05	1e-05	1e-05	1e-05	1e-05	1e-05	1e-05	1e-05	1e-05	1e-05	1e-05	1e-05	1e-05	1e-05	1e-05	1e-05
ALG5	1e-05	1e-05	1e-05	1e-05	1e-05	1e-05	1e-05	1e-05	1e-05	1e-05	1e-05	1e-05	1e-05	1e-05	1e-05	1e-05	1e-05	1e-05	1e-05	1e-05	1e-05	1e-05	1e-05	1e-05	0.28513	1e-05	1e-05	1e-05	1e-05	1e-05	1e-05	1e-05	1e-05	1e-05	1e-05	1e-05	1e-05	1e-05	1e-05	1e-05	1e-05	1e-05	1e-05	1e-05	1e-05	1e-05	1e-05	1e-05	1e-05
ALG6	1e-05	1e-05	1e-05	1e-05	1e-05	1e-05	1e-05	1e-05	1e-05	1e-05	1e-05	1e-05	1e-05	1e-05	1e-05	1e-05	1e-05	1e-05	1e-05	1e-05	1e-05	1e-05	1e-05	1e-05	1e-05	1e-05	1e-05	1e-05	1e-05	1e-05	1e-05	1e-05	1e-05	1e-05	1e-05	1e-05	1e-05	1e-05	1e-05	1e-05	1e-05	1e-05	1e-05	1e-05	1e-05	1e-05	1e-05	1e-05	1e-05
ALG9	1e-05	1e-05	1e-05	1e-05	1e-05	1e-05	1e-05	1e-05	1e-05	1e-05	1e-05	1e-05	1e-05	1e-05	1e-05	1e-05	1e-05	1e-05	0.172543	1e-05	1e-05	1e-05	1e-05	1e-05	1e-05	1e-05	1e-05	1e-05	1e-05	1e-05	1e-05	1e-05	1e-05	1e-05	1e-05	1e-05	1e-05	1e-05	1e-05	1e-05	1e-05	1e-05	1e-05	1e-05	1e-05	1e-05	1e-05	1e-05	1e-05
ALK	1e-05	1e-05	1e-05	1e-05	1e-05	1e-05	1e-05	1e-05	1e-05	1e-05	1e-05	1e-05	1e-05	1e-05	1e-05	1e-05	1e-05	1e-05	1e-05	1e-05	1e-05	1e-05	1e-05	1e-05	1e-05	1e-05	1e-05	1e-05	1e-05	1e-05	1e-05	1e-05	1e-05	1e-05	1e-05	1e-05	1e-05	1e-05	1e-05	1e-05	1e-05	1e-05	1e-05	1e-05	1e-05	1e-05	1e-05	1e-05	1e-05
ALKBH4	1e-05	1e-05	1e-05	1e-05	1e-05	1e-05	1e-05	1e-05	1e-05	1e-05	1e-05	1e-05	1e-05	1e-05	1e-05	1e-05	1e-05	1e-05	1e-05	1e-05	1e-05	1e-05	1e-05	1e-05	1e-05	1e-05	1e-05	1e-05	1e-05	1e-05	1e-05	1e-05	1e-05	1e-05	1e-05	1e-05	1e-05	1e-05	1e-05	1e-05	1e-05	1e-05	1e-05	1e-05	1e-05	1e-05	1e-05	1e-05	1e-05
ALKBH5	1e-05	1e-05	1e-05	1e-05	1e-05	1e-05	1e-05	1e-05	1e-05	1e-05	1e-05	1e-05	1e-05	1e-05	1e-05	1e-05	1e-05	1e-05	1e-05	1e-05	1e-05	1e-05	1e-05	1e-05	1e-05	1e-05	1e-05	1e-05	1e-05	1e-05	1e-05	1e-05	1e-05	1e-05	1e-05	1e-05	1e-05	1e-05	1e-05	1e-05	1e-05	1e-05	1e-05	1e-05	1e-05	1e-05	1e-05	1e-05	1e-05
ALKBH8	1e-05	1e-05	1e-05	1e-05	1e-05	1e-05	1e-05	1e-05	1e-05	1e-05	1e-05	1e-05	1e-05	1e-05	1e-05	1e-05	1e-05	1e-05	1e-05	1e-05	1e-05	1e-05	1e-05	1e-05	1e-05	1e-05	1e-05	1e-05	1e-05	1e-05	1e-05	1e-05	1e-05	1e-05	1e-05	1e-05	1e-05	1e-05	1e-05	1e-05	1e-05	1e-05	1e-05	1e-05	1e-05	1e-05	1e-05	1e-05	1e-05
ALOX12B	1e-05	1e-05	1e-05	1e-05	1e-05	1e-05	1e-05	1e-05	1e-05	1e-05	1e-05	1e-05	1e-05	1e-05	1e-05	1e-05	1e-05	1e-05	1e-05	1e-05	1e-05	1e-05	0.131265	1e-05	1e-05	1e-05	1e-05	1e-05	1e-05	1e-05	1e-05	1e-05	1e-05	1e-05	1e-05	1e-05	1e-05	1e-05	1e-05	1e-05	1e-05	1e-05	1e-05	1e-05	1e-05	1e-05	1e-05	1e-05	1e-05
ALOX15	1e-05	1e-05	1e-05	1e-05	1e-05	1e-05	1e-05	1e-05	1e-05	1e-05	1e-05	1e-05	1e-05	1e-05	1e-05	1e-05	1e-05	1e-05	1e-05	1e-05	1e-05	1e-05	1e-05	1e-05	1e-05	1e-05	1e-05	1e-05	1e-05	1e-05	1e-05	1e-05	1e-05	1e-05	1e-05	1e-05	1e-05	1e-05	1e-05	1e-05	1e-05	1e-05	1e-05	1e-05	1e-05	1e-05	1e-05	1e-05	1e-05
ALOX15B	1e-05	1e-05	1e-05	1e-05	1e-05	1e-05	1e-05	1e-05	1e-05	1e-05	1e-05	1e-05	1e-05	1e-05	1e-05	1e-05	1e-05	1e-05	1e-05	1e-05	1e-05	1e-05	1e-05	1e-05	1e-05	1e-05	1e-05	1e-05	1e-05	1e-05	1e-05	1e-05	1e-05	1e-05	1e-05	1e-05	1e-05	1e-05	1e-05	1e-05	1e-05	1e-05	1e-05	1e-05	1e-05	0.0548129	1e-05	1e-05	1e-05
ALOX5	8.69343	7.1653	7.0618	8.15595	8.41515	14.7313	6.68518	6.87598	8.897	6.00343	13.8914	7.07819	6.6018	7.55864	5.05141	9.43257	8.9796	3.90789	5.18606	132.4	7.9033	6.29093	6.25088	8.42055	11.0012	7.65632	6.21665	7.67591	7.26096	8.19491	14.8813	8.52181	6.95905	6.29781	6.58491	7.91008	14.7923	7.54554	9.16842	6.70067	3.18672	14.029	7.78928	6.97502	10.0125	6.93748	5.77717	6.58432	7.21898
ALOX5AP	1e-05	1e-05	1e-05	1e-05	1e-05	1e-05	1e-05	1e-05	1e-05	1e-05	1e-05	1e-05	1e-05	1e-05	1e-05	1e-05	1e-05	1e-05	1e-05	1e-05	1e-05	1e-05	1e-05	1e-05	1e-05	1e-05	1e-05	1e-05	1e-05	1e-05	1e-05	1e-05	1e-05	1e-05	1e-05	1e-05	1e-05	1e-05	1e-05	1e-05	1e-05	1e-05	1e-05	1e-05	1e-05	1e-05	1e-05	1e-05	1e-05
ALPG	1e-05	1e-05	1e-05	1e-05	1.11528	1e-05	1e-05	0.598267	1e-05	1e-05	1e-05	1e-05	1e-05	1e-05	1e-05	1e-05	1e-05	1.72031	0.113185	1e-05	1e-05	1e-05	1e-05	1.25062	1e-05	1.89826	1e-05	1e-05	1e-05	1e-05	1e-05	1e-05	1e-05	1e-05	1e-05	1e-05	1e-05	1e-05	1e-05	1e-05	1.36752	1e-05	1e-05	1e-05	1.22792	1e-05	1e-05	1e-05	1e-05
ALPI	1e-05	1e-05	1e-05	1e-05	1e-05	1e-05	1e-05	1e-05	1e-05	1e-05	1e-05	1e-05	1e-05	1e-05	1e-05	1e-05	1e-05	1e-05	0.125761	1e-05	1e-05	1e-05	1e-05	1e-05	1e-05	1e-05	1e-05	1e-05	1e-05	1e-05	1e-05	1e-05	1e-05	1e-05	1e-05	1e-05	1e-05	1e-05	1e-05	1e-05	1e-05	1e-05	1e-05	1e-05	1e-05	1e-05	1e-05	1e-05	1e-05
ALPL	0.71591	1.43515	0.172019	0.251205	0.409041	0.257813	0.187933	0.294215	0.325767	0.554824	1.26283	0.380908	0.440083	0.145867	0.361657	0.402584	0.161521	2.85791	0.223427	0.124234	0.23865	0.594214	0.401218	0.235735	0.244374	0.49701	0.333972	0.238228	0.793793	0.686691	0.392142	0.178019	0.135979	0.319306	2.33172	0.131573	0.271874	0.362376	0.269347	0.249876	0.339491	0.239841	0.225215	0.232158	0.205508	0.110097	0.412485	0.992909	0.437719
ALPP	1e-05	1e-05	1e-05	1e-05	1.11528	1e-05	1e-05	0.598267	1e-05	1e-05	1e-05	1e-05	1e-05	1e-05	1e-05	1e-05	1e-05	1.72031	0.113185	1e-05	1e-05	1e-05	1e-05	1.25062	1e-05	1.89826	1e-05	1e-05	1e-05	1e-05	1e-05	1e-05	1e-05	1e-05	1e-05	1e-05	1e-05	1e-05	1e-05	1e-05	1.36752	1e-05	1e-05	1e-05	1.22792	1e-05	1e-05	1e-05	1e-05
ALYREF	2.2596	0.40854	2.76675	2.65573	2.58907	2.66382	2.68614	2.46211	2.63341	0.29919	2.91754	1.39092	0.0199609	0.385777	2.77399	0.373199	2.88042	0.56155	2.58955	3.35844	2.81914	0.107015	0.385565	0.0641914	2.75609	2.42879	2.58847	2.65759	2.741	2.70796	2.73757	2.865	0.164795	2.42704	2.97561	2.51193	3.02486	2.71306	2.51576	2.7388	2.39571	2.62712	2.8486	2.36968	0.107562	2.91661	0.35205	2.62817	2.94865
AMACR	1e-05	1e-05	1e-05	1e-05	1e-05	0.835047	1e-05	1e-05	1e-05	1e-05	1e-05	0.217466	1e-05	1e-05	1e-05	1e-05	1e-05	0.170804	1e-05	1.00346	1e-05	1e-05	1e-05	1e-05	1e-05	1e-05	1e-05	1e-05	1e-05	1e-05	1e-05	1e-05	1e-05	1e-05	1e-05	1e-05	1e-05	1e-05	1e-05	1e-05	1e-05	1e-05	1e-05	1e-05	1e-05	0.831189	2.03797	1e-05	1e-05
AMBP	85.8619	61.9732	94.0727	124.274	60.3681	98.3155	66.5565	52.3103	47.6774	61.5486	66.9102	87.5549	103.769	105.106	90.8462	75.7293	60.3412	91.495	65.3967	60.3813	89.7772	65.7797	54.6781	62.3943	75.1279	43.4294	79.4683	52.7561	105.901	79.9135	72.1243	69.2145	46.6048	40.2683	102.912	120.336	66.5406	72.0585	66.5774	88.2765	63.1761	83.5054	62.9261	89.2105	51.0904	67.3201	46.2294	80.0212	65.5867
AMDHD1	1e-05	1e-05	1e-05	1e-05	1e-05	1e-05	1e-05	1e-05	1e-05	1e-05	1e-05	1e-05	1e-05	1e-05	1e-05	1e-05	1e-05	1e-05	1e-05	1e-05	1e-05	1e-05	1e-05	1e-05	1e-05	1e-05	1e-05	1e-05	1e-05	1e-05	1e-05	1e-05	1e-05	1e-05	1e-05	1e-05	1e-05	1e-05	1e-05	1e-05	1e-05	1e-05	1e-05	1e-05	1e-05	1e-05	1e-05	1e-05	1e-05
AMDHD2	1e-05	1e-05	1e-05	1e-05	1e-05	1e-05	1e-05	1e-05	1e-05	1e-05	1e-05	1e-05	1e-05	1e-05	1e-05	1e-05	1e-05	1e-05	1e-05	1e-05	0.8147	1e-05	1e-05	1e-05	1e-05	1e-05	1e-05	1e-05	1e-05	1e-05	1e-05	1e-05	1e-05	1e-05	1e-05	1e-05	1e-05	1e-05	1e-05	1e-05	1e-05	1e-05	1e-05	1e-05	0.39153	1e-05	1e-05	1e-05	1e-05
AMN	1e-05	1e-05	1e-05	1.2481	1e-05	0.0598956	1e-05	1e-05	1e-05	1e-05	1e-05	1e-05	1e-05	1e-05	1e-05	1e-05	1e-05	1e-05	1e-05	0.524435	1e-05	1e-05	0.147925	1e-05	1e-05	0.0525289	1e-05	1e-05	1e-05	1e-05	1e-05	1e-05	1e-05	1e-05	1e-05	1e-05	1e-05	1e-05	1e-05	1e-05	1e-05	1e-05	1e-05	1e-05	1e-05	1e-05	1e-05	1e-05	1e-05
AMPD2	1e-05	1e-05	1e-05	1e-05	1e-05	1e-05	1e-05	1e-05	1e-05	1e-05	1e-05	1e-05	1e-05	1e-05	1e-05	1e-05	1e-05	1e-05	1e-05	1e-05	1e-05	1e-05	1e-05	1e-05	1e-05	1e-05	1e-05	1e-05	1e-05	1e-05	1e-05	0.125221	1e-05	1e-05	1e-05	1e-05	1e-05	1e-05	1e-05	1e-05	1e-05	1e-05	1e-05	1e-05	1e-05	1e-05	1e-05	1e-05	1e-05
AMPD3	1.60274	2.24474	1.25966	2.68704	1.422	2.00299	2.12876	1.15141	1.87715	2.86666	2.5945	3.00453	2.05484	1.84018	2.568	3.64205	2.08719	1.2241	1.52443	2.61034	1.59192	1.9616	3.43735	1.5409	1.3182	1.3738	1.65104	2.25633	2.21778	3.16996	1.61618	1.72981	2.40814	1.44642	2.0798	1.71801	2.49982	1.90669	1.73261	2.63696	1.93205	1.89331	2.58103	1.87557	1.67612	3.25088	2.93352	1.91805	3.21963
AMPH	0.195788	1e-05	1e-05	1e-05	1e-05	1e-05	1e-05	1e-05	1e-05	1e-05	1e-05	1e-05	1e-05	1e-05	1e-05	1e-05	1e-05	1e-05	1e-05	1e-05	1e-05	1e-05	1e-05	1e-05	1e-05	1e-05	1e-05	1e-05	1e-05	1e-05	1e-05	1e-05	1e-05	1e-05	1e-05	1e-05	1e-05	1e-05	1e-05	1e-05	1e-05	1e-05	1e-05	1e-05	1e-05	1e-05	1e-05	0.363272	1e-05
AMT	1e-05	1e-05	1e-05	1e-05	1e-05	1e-05	1e-05	1e-05	1e-05	1e-05	1e-05	1e-05	1e-05	1e-05	1e-05	1e-05	1e-05	1e-05	1e-05	1e-05	1e-05	1e-05	1e-05	1e-05	1e-05	1e-05	1e-05	1e-05	1e-05	1e-05	1e-05	1e-05	1e-05	1e-05	1e-05	1e-05	1e-05	1e-05	1e-05	1e-05	1e-05	1e-05	1e-05	1e-05	1e-05	1e-05	1e-05	1e-05	1e-05
AMY1A	0.561488	0.013147	0.730557	0.0164267	0.355106	0.0490228	0.268226	5.11459	0.708068	0.218322	7.70089	5.8207	0.033257	4.9087	0.47899	0.961005	0.02391	0.0285377	0.0078344	4.55407	0.561233	0.227913	1.01682	0.0250326	3.87719	5.3939	0.0334251	0.321407	9.08115	0.182031	4.24025	4.43122	0.0145513	4.91696	5.26231	5.11673	0.0128247	0.0114247	0.0102605	0.333209	0.0148304	0.171384	0.183364	0.0174338	0.025385	0.151628	0.0130664	0.735862	0.233353
AMY2A	0.650476	0.0136004	0.925433	8.10724	4.82955	1.59346	5.35509	9.457	0.732484	7.48928	7.96644	10.2517	0.0344038	10.2911	0.495507	0.994143	0.0247344	0.0295218	0.00810455	4.7111	0.667409	0.235772	5.80868	0.0258958	4.43708	5.57989	0.0645954	0.33249	9.39429	5.77992	4.38647	4.58402	0.0150531	5.08651	5.44377	5.29317	6.359	0.0118186	0.0533245	0.344699	0.0153418	0.177293	0.244612	0.514447	0.0262604	4.91539	0.134846	0.761237	3.6232
AMY2B	0.58085	0.0136004	0.755748	0.0169931	0.355106	0.0507132	0.277476	5.29096	0.732484	0.22585	7.96644	6.02141	0.0344038	5.07797	0.495507	0.994143	0.0247344	0.0295218	0.00810455	4.7111	0.580586	0.235772	1.05188	0.0258958	4.01088	5.57989	0.0345777	0.33249	9.39429	0.188308	4.38647	4.58402	0.0150531	5.08651	5.44377	5.29317	0.0132669	0.0118186	0.0106143	0.344699	0.0153418	0.177293	0.189687	0.0180349	0.0262604	0.156857	0.0135169	0.761237	0.233353
ANAPC1	1e-05	1e-05	1e-05	1e-05	1e-05	1e-05	1e-05	1e-05	1e-05	1e-05	1e-05	1e-05	0.0403496	1e-05	1e-05	1e-05	1e-05	1e-05	1e-05	0.0124883	1e-05	1e-05	1e-05	1e-05	1e-05	1e-05	1e-05	1e-05	1e-05	1e-05	1e-05	1e-05	1e-05	1e-05	1e-05	1e-05	1e-05	1e-05	1e-05	1e-05	1e-05	1e-05	1e-05	1e-05	1e-05	1e-05	1e-05	1e-05	1e-05
ANAPC10	1e-05	1e-05	1e-05	1e-05	1e-05	1e-05	1e-05	1e-05	1e-05	1e-05	1e-05	1e-05	1e-05	1e-05	1e-05	1e-05	1e-05	1e-05	1e-05	1e-05	1e-05	1e-05	1e-05	1e-05	0.72087	1e-05	1e-05	1e-05	1e-05	1e-05	1e-05	1e-05	1e-05	1e-05	1e-05	1e-05	1e-05	1e-05	1e-05	1e-05	1e-05	1e-05	1e-05	1e-05	1e-05	1e-05	1e-05	1e-05	1e-05
ANAPC13	1e-05	1e-05	1e-05	1e-05	1e-05	1e-05	1e-05	1e-05	1e-05	1e-05	1e-05	1e-05	1e-05	1e-05	1e-05	1e-05	1e-05	1e-05	1e-05	1e-05	1e-05	1e-05	1e-05	1e-05	1e-05	1e-05	1e-05	1e-05	1e-05	1e-05	1e-05	1e-05	1e-05	1e-05	1e-05	1e-05	1e-05	1e-05	1e-05	1e-05	1e-05	1e-05	1e-05	1e-05	1e-05	1e-05	1e-05	1e-05	1e-05
ANAPC16	1e-05	1e-05	1e-05	1e-05	1e-05	1e-05	1e-05	1e-05	1e-05	1e-05	1e-05	1e-05	1e-05	1e-05	1e-05	1e-05	1e-05	1e-05	1e-05	1e-05	1e-05	1e-05	1e-05	1e-05	1e-05	1e-05	1e-05	1e-05	1e-05	1e-05	1e-05	1e-05	1e-05	1e-05	1e-05	1e-05	1e-05	1e-05	1e-05	1e-05	1e-05	1e-05	1e-05	1e-05	1e-05	1e-05	1e-05	1e-05	1e-05
ANAPC2	1e-05	1e-05	1e-05	1e-05	1e-05	1e-05	1e-05	1e-05	1e-05	1e-05	1e-05	1e-05	1e-05	1e-05	1e-05	1e-05	1e-05	1e-05	1e-05	1e-05	1e-05	0.23961	1e-05	1e-05	1e-05	1e-05	1e-05	1e-05	1e-05	1e-05	1e-05	1e-05	1e-05	1e-05	1e-05	0.0457221	1e-05	1e-05	1e-05	1e-05	1e-05	1e-05	1e-05	1e-05	1e-05	1e-05	1e-05	1e-05	0.394372
ANAPC4	1e-05	1e-05	1e-05	1e-05	1e-05	1e-05	1e-05	1e-05	1e-05	1e-05	1e-05	1e-05	1e-05	1e-05	1e-05	1e-05	1e-05	1e-05	1e-05	1e-05	1e-05	1e-05	1e-05	1e-05	1e-05	1e-05	1e-05	1e-05	1e-05	1e-05	1e-05	1e-05	1e-05	1e-05	1e-05	1e-05	1e-05	1e-05	1e-05	1e-05	1e-05	1e-05	1e-05	1e-05	1e-05	1e-05	1e-05	1e-05	1e-05
ANAPC5	1e-05	1e-05	1e-05	1e-05	1e-05	1e-05	1e-05	1e-05	1e-05	1e-05	1e-05	1e-05	1e-05	1e-05	1e-05	1e-05	1e-05	1e-05	1e-05	1e-05	1e-05	1e-05	1e-05	1e-05	1e-05	1e-05	1e-05	1e-05	1e-05	1e-05	1e-05	1e-05	1e-05	1e-05	1e-05	1e-05	1e-05	1e-05	1e-05	1e-05	1e-05	1e-05	1e-05	1e-05	1e-05	1e-05	1e-05	1e-05	1e-05
ANAPC7	1e-05	1e-05	1e-05	1e-05	1e-05	1e-05	1e-05	1e-05	1e-05	1e-05	1e-05	1e-05	1e-05	1e-05	1e-05	1e-05	1e-05	1e-05	1e-05	1e-05	1e-05	1e-05	1e-05	1e-05	1e-05	1e-05	1e-05	1e-05	1e-05	1e-05	1e-05	1e-05	1e-05	1e-05	1e-05	1e-05	1e-05	0.0380763	1e-05	1e-05	1e-05	1e-05	1e-05	1e-05	1e-05	1e-05	1e-05	1e-05	1e-05
ANG	1e-05	1e-05	93.1327	1e-05	1e-05	1e-05	1e-05	1e-05	1e-05	1e-05	54.9011	1e-05	1e-05	1e-05	28.9895	1e-05	1e-05	1e-05	43.3061	55.3564	1e-05	1e-05	1e-05	1e-05	1e-05	1e-05	38.1993	1e-05	1e-05	1e-05	1e-05	50.0589	44.0388	1e-05	1e-05	1e-05	56.3716	52.8362	1e-05	1e-05	1e-05	57.4962	76.7266	1e-05	1e-05	1e-05	1e-05	1e-05	1e-05
ANGPTL2	1e-05	1e-05	1e-05	1e-05	1e-05	1e-05	1e-05	1e-05	1e-05	1e-05	1e-05	1e-05	1e-05	1e-05	1e-05	1e-05	1e-05	1e-05	1e-05	1e-05	1e-05	1e-05	1e-05	1e-05	1e-05	1e-05	1e-05	1e-05	1e-05	1e-05	1e-05	1e-05	1e-05	1e-05	1e-05	1e-05	1e-05	1e-05	1e-05	1e-05	1e-05	1e-05	1e-05	1e-05	0.132236	1e-05	1e-05	1e-05	1e-05
ANGPTL3	2.2596	2.54952	0.325129	2.65573	0.413956	2.66382	0.460786	0.494287	2.63341	0.389096	2.91754	2.77789	2.71377	2.55032	0.480049	0.528341	2.88042	0.864377	0.180654	3.35844	0.383643	2.55642	2.84351	2.27011	2.75609	2.42879	2.58847	2.65759	0.459871	2.70796	0.605237	2.865	2.52944	2.42704	2.97561	0.0960617	3.02486	0.202387	0.384506	0.416278	0.583449	0.584314	0.716473	2.36968	2.38399	2.91661	0.587901	0.489451	2.94865
ANGPTL4	1e-05	1e-05	1e-05	1e-05	1e-05	1e-05	1e-05	1e-05	1e-05	1e-05	1e-05	1e-05	1e-05	1e-05	1e-05	1e-05	1e-05	1e-05	1e-05	1e-05	1e-05	1e-05	1e-05	1e-05	1e-05	1e-05	1e-05	1e-05	1e-05	1e-05	1e-05	1e-05	1e-05	1e-05	1e-05	1e-05	1e-05	1e-05	1e-05	1e-05	1e-05	1e-05	1e-05	1e-05	1e-05	0.0702196	1e-05	1e-05	1e-05
ANGPTL6	1e-05	1e-05	1e-05	1e-05	1e-05	1e-05	1e-05	1e-05	1e-05	1e-05	1e-05	1e-05	1e-05	1e-05	1e-05	1e-05	1e-05	1e-05	1e-05	1e-05	1e-05	1e-05	1e-05	1e-05	1e-05	1e-05	1e-05	1e-05	1e-05	1e-05	1e-05	1e-05	1e-05	1e-05	1e-05	1e-05	1e-05	1e-05	1e-05	1e-05	1e-05	1e-05	1e-05	1e-05	1e-05	1e-05	1e-05	1e-05	1e-05
ANK1	0.0670665	1.11246	0.178854	0.447485	0.221992	0.452844	0.0849254	0.167238	0.4004	0.553554	0.392736	0.502568	0.247321	0.334699	0.113034	0.231368	0.18707	0.267317	0.128291	0.754319	0.312289	0.165584	0.34267	0.221476	0.19744	0.232239	0.269645	0.186092	0.266752	0.232845	0.314567	0.196214	0.369844	0.220627	0.393003	0.551016	0.42203	0.223437	0.305219	0.271255	0.223179	0.271295	0.459056	0.119666	0.155231	0.393007	0.744222	0.304537	0.318916
ANK2	0.111886	1e-05	1e-05	1e-05	0.00319582	1e-05	0.00311104	1e-05	1e-05	0.051661	1e-05	1e-05	1e-05	1e-05	0.0237079	1e-05	1e-05	1e-05	1e-05	1e-05	1e-05	1e-05	1e-05	1e-05	1e-05	1e-05	0.0683865	1e-05	1e-05	0.0859394	1e-05	0.117109	1e-05	1e-05	1e-05	1e-05	0.0037346	0.0368734	0.0628353	1e-05	0.0794808	1e-05	1e-05	1e-05	1e-05	1e-05	1e-05	0.0207553	0.00469995
ANK3	0.00384268	1e-05	1e-05	1e-05	0.00276739	1e-05	0.00269398	1e-05	1e-05	0.00460323	1e-05	1e-05	1e-05	1e-05	1e-05	1e-05	1e-05	1e-05	1e-05	1e-05	1e-05	1e-05	1e-05	1e-05	1e-05	1e-05	1e-05	1e-05	1e-05	0.00291935	1e-05	1e-05	1e-05	1e-05	1e-05	1e-05	1e-05	1e-05	1e-05	1e-05	1e-05	1e-05	1e-05	1e-05	1e-05	1e-05	1e-05	1e-05	0.00406989
ANKFY1	1e-05	1e-05	1e-05	0.1107	1e-05	1e-05	1e-05	1e-05	1e-05	0.136799	1e-05	1e-05	1e-05	0.0542307	1e-05	1e-05	1e-05	1e-05	1e-05	1e-05	0.0648234	0.0974422	1e-05	1e-05	0.195973	0.0702992	1e-05	1e-05	1e-05	1e-05	1e-05	1e-05	1e-05	0.0407959	1e-05	1e-05	0.21706	1e-05	1e-05	1e-05	1e-05	1e-05	1e-05	0.0299594	1e-05	1e-05	1e-05	1e-05	1e-05
ANKH	1e-05	1e-05	1e-05	1e-05	1e-05	1e-05	1e-05	1e-05	1e-05	1e-05	1e-05	1e-05	1e-05	1e-05	1e-05	1e-05	1e-05	1e-05	1e-05	1e-05	1e-05	1e-05	1e-05	1e-05	1e-05	1e-05	1e-05	1e-05	1e-05	1e-05	1e-05	1e-05	1e-05	1e-05	1e-05	1e-05	1e-05	1e-05	1e-05	1e-05	1e-05	1e-05	1e-05	1e-05	1e-05	1e-05	1e-05	1e-05	1e-05
ANKHD1	1e-05	1e-05	1e-05	1e-05	1e-05	0.0287181	1e-05	1e-05	1e-05	1e-05	0.382201	1e-05	1e-05	1e-05	1e-05	1e-05	1e-05	0.0254298	1e-05	1e-05	0.279993	1e-05	1e-05	1e-05	1e-05	1e-05	1e-05	1e-05	1e-05	1e-05	0.521783	1e-05	1e-05	0.0343808	1e-05	0.00824171	1e-05	1e-05	1e-05	1e-05	1e-05	1e-05	1e-05	1e-05	1e-05	0.0122926	0.0685424	1e-05	1e-05
ANKIB1	1e-05	1e-05	1e-05	1e-05	1e-05	1e-05	1e-05	1e-05	1e-05	1e-05	3.22663	1e-05	1e-05	1e-05	1e-05	1e-05	1e-05	1e-05	1e-05	1e-05	1e-05	0.0256358	1e-05	1e-05	1e-05	1e-05	1e-05	1e-05	1e-05	1e-05	1e-05	1e-05	1e-05	1e-05	1e-05	1e-05	1e-05	1e-05	1e-05	1e-05	1e-05	1e-05	1e-05	1e-05	1e-05	1e-05	1e-05	1e-05	1e-05
ANKLE2	1e-05	1e-05	1e-05	1e-05	1e-05	1e-05	1e-05	1e-05	1e-05	1e-05	1e-05	1e-05	1e-05	1e-05	1e-05	1e-05	1e-05	1e-05	1e-05	1e-05	1e-05	1e-05	1e-05	1e-05	1e-05	1e-05	1e-05	1e-05	1e-05	1e-05	1e-05	1e-05	1e-05	1e-05	1e-05	1e-05	1e-05	1e-05	1e-05	1e-05	1e-05	1e-05	1e-05	1e-05	1e-05	1e-05	1e-05	1e-05	1e-05
ANKMY2	1e-05	1e-05	1e-05	1e-05	1e-05	1e-05	1e-05	1e-05	1e-05	1e-05	1e-05	1e-05	1e-05	1e-05	1e-05	1e-05	1e-05	1e-05	1e-05	1e-05	1e-05	1e-05	1e-05	1e-05	1e-05	1e-05	1e-05	1e-05	1e-05	1e-05	1e-05	1e-05	1e-05	1e-05	1e-05	1e-05	1e-05	1e-05	1e-05	1e-05	1e-05	1e-05	1e-05	1e-05	1e-05	1e-05	1e-05	1e-05	1e-05
ANKRD13A	1e-05	1e-05	1e-05	1e-05	1e-05	1e-05	1e-05	1e-05	1e-05	1e-05	1e-05	1e-05	1e-05	1e-05	1e-05	1e-05	1e-05	0.496613	1e-05	1e-05	1e-05	1e-05	1e-05	1e-05	1e-05	1e-05	1e-05	1e-05	1e-05	1e-05	1e-05	1e-05	1e-05	1e-05	1e-05	1e-05	1e-05	1e-05	1e-05	1e-05	1e-05	1e-05	1e-05	1e-05	1e-05	1e-05	1e-05	1e-05	1e-05
ANKRD17	1e-05	1e-05	1e-05	1e-05	1e-05	0.0289656	1e-05	1e-05	1e-05	1e-05	0.385496	1e-05	1e-05	1e-05	1e-05	1e-05	1e-05	0.025649	1e-05	1e-05	0.282406	1e-05	1e-05	1e-05	1e-05	1e-05	1e-05	1e-05	1e-05	1e-05	0.526282	1e-05	1e-05	0.0346772	1e-05	0.00831276	1e-05	1e-05	1e-05	1e-05	1e-05	1e-05	1e-05	1e-05	1e-05	0.0123985	0.0691333	1e-05	1e-05
ANKRD2	1e-05	1e-05	1e-05	1e-05	1e-05	1e-05	1e-05	1e-05	1e-05	1e-05	1e-05	1e-05	1e-05	1e-05	1e-05	1e-05	1e-05	1e-05	1e-05	1e-05	1e-05	1e-05	1e-05	1e-05	1e-05	1e-05	1e-05	1e-05	1e-05	1e-05	1e-05	1e-05	1e-05	1e-05	1e-05	1e-05	1e-05	1e-05	1e-05	1e-05	1e-05	1e-05	1e-05	1e-05	1e-05	1e-05	1e-05	1e-05	1e-05
ANKRD22	1e-05	1e-05	1e-05	1e-05	1e-05	1e-05	1e-05	1e-05	1e-05	1e-05	1e-05	1e-05	0.229682	1e-05	1e-05	1e-05	1e-05	1e-05	1e-05	1e-05	1e-05	1e-05	1e-05	1e-05	1e-05	1e-05	1e-05	1e-05	1e-05	1e-05	1e-05	1e-05	1e-05	1e-05	1e-05	1e-05	1e-05	1e-05	1e-05	1e-05	1e-05	1e-05	1e-05	1e-05	1e-05	1e-05	1e-05	1e-05	1e-05
ANKRD27	1e-05	1e-05	1e-05	1e-05	1e-05	1e-05	1e-05	1e-05	1e-05	1e-05	1e-05	1e-05	1e-05	1e-05	1e-05	1e-05	1e-05	1e-05	1e-05	1e-05	1e-05	1e-05	1e-05	1e-05	1e-05	1e-05	1e-05	1e-05	1e-05	1e-05	1e-05	1e-05	1e-05	1e-05	1e-05	1e-05	1e-05	1e-05	1e-05	1e-05	1e-05	1e-05	1e-05	1e-05	1e-05	1e-05	1e-05	1e-05	1e-05
ANKRD28	0.240712	1e-05	1e-05	1e-05	1e-05	1e-05	1e-05	1e-05	1e-05	1e-05	1e-05	0.0393756	0.045359	1e-05	1e-05	1e-05	1e-05	1e-05	1e-05	0.0513946	1e-05	1e-05	1e-05	1e-05	1e-05	1e-05	0.0381592	1e-05	0.512017	1e-05	1e-05	1e-05	1e-05	1e-05	1e-05	1e-05	1e-05	1e-05	1e-05	1e-05	1e-05	1e-05	1e-05	1e-05	1e-05	1e-05	1e-05	1e-05	0.0958153
ANKRD35	1e-05	1e-05	1e-05	1e-05	1e-05	1e-05	1e-05	1e-05	1e-05	1e-05	1e-05	1e-05	1e-05	1e-05	1e-05	1e-05	0.0512249	1e-05	1e-05	1e-05	1e-05	1e-05	1e-05	1e-05	1e-05	1e-05	1e-05	1e-05	1e-05	1e-05	1e-05	1e-05	1e-05	1e-05	1e-05	1e-05	1e-05	1e-05	1e-05	1e-05	1e-05	1e-05	1e-05	1e-05	1e-05	1e-05	1e-05	1e-05	1e-05
ANKRD44	0.231083	1e-05	1e-05	1e-05	1e-05	1e-05	1e-05	1e-05	1e-05	1e-05	1e-05	0.0322739	1e-05	1e-05	1e-05	0.0142698	1e-05	1e-05	1e-05	1e-05	1e-05	0.11587	1e-05	1e-05	1e-05	1e-05	1e-05	1e-05	0.491537	1e-05	1e-05	1e-05	1e-05	1e-05	1e-05	1e-05	1e-05	1e-05	1e-05	1e-05	1e-05	1e-05	1e-05	1e-05	1e-05	1e-05	1e-05	1e-05	1e-05
ANKRD45	1e-05	1e-05	1e-05	1e-05	1e-05	1e-05	1e-05	1e-05	1e-05	1e-05	1e-05	1e-05	1e-05	1e-05	1e-05	1e-05	1e-05	1e-05	1e-05	1e-05	1e-05	1e-05	1e-05	1e-05	1e-05	1e-05	1e-05	1e-05	1e-05	1e-05	1e-05	1e-05	1e-05	1e-05	1e-05	1e-05	1e-05	1e-05	1e-05	1e-05	1e-05	1e-05	1e-05	1e-05	1e-05	1e-05	1e-05	1e-05	1e-05
ANKRD50	1e-05	1e-05	1e-05	1e-05	1e-05	1e-05	1e-05	1e-05	1e-05	1e-05	1e-05	1e-05	1e-05	1e-05	1e-05	1e-05	1e-05	1e-05	1e-05	1e-05	1e-05	1e-05	1e-05	1e-05	1e-05	1e-05	0.0642447	1e-05	1e-05	1e-05	1e-05	1e-05	1e-05	1e-05	1e-05	1e-05	1e-05	1e-05	1e-05	1e-05	1e-05	1e-05	1e-05	1e-05	1e-05	1e-05	1e-05	1e-05	1e-05
ANKS1A	1e-05	1e-05	1e-05	1e-05	0.140675	1e-05	1e-05	1e-05	1e-05	1e-05	1e-05	1e-05	8.51324	1e-05	1e-05	1e-05	1e-05	1e-05	1e-05	1e-05	1e-05	1e-05	1e-05	1e-05	0.0984978	1e-05	1e-05	1e-05	1e-05	1e-05	1e-05	1e-05	0.0226864	1e-05	12.8365	1e-05	1e-05	1e-05	1e-05	1e-05	1e-05	1e-05	1e-05	1e-05	1e-05	1e-05	1e-05	1e-05	1e-05
ANKS4B	1e-05	6.00407	1e-05	1e-05	4.64976	1e-05	1e-05	1e-05	1e-05	1e-05	8.02822	1e-05	1e-05	5.58069	1e-05	1e-05	1e-05	1e-05	1e-05	1e-05	1e-05	1e-05	1e-05	1e-05	1e-05	1e-05	1e-05	1e-05	1e-05	1e-05	1e-05	1e-05	1e-05	1e-05	1e-05	1e-05	1e-05	1e-05	1e-05	1e-05	1e-05	1e-05	1e-05	1e-05	1e-05	1e-05	1e-05	1e-05	1e-05
ANKZF1	1e-05	1e-05	1e-05	1e-05	1e-05	1e-05	1e-05	1e-05	1e-05	1e-05	1e-05	1e-05	1e-05	1e-05	1e-05	1e-05	1e-05	1e-05	1e-05	1e-05	1e-05	1e-05	1e-05	1e-05	1e-05	1e-05	1e-05	1e-05	1e-05	1e-05	1e-05	1e-05	1e-05	1e-05	1e-05	1e-05	1e-05	1e-05	1e-05	1e-05	1e-05	1e-05	1e-05	1e-05	1e-05	1e-05	1e-05	1e-05	1e-05
ANLN	1e-05	1e-05	1e-05	1e-05	1e-05	1e-05	1e-05	1e-05	1e-05	1e-05	1e-05	1e-05	1e-05	1e-05	1e-05	1e-05	1e-05	1e-05	1e-05	1e-05	1e-05	1e-05	1e-05	0.100173	1e-05	1e-05	1e-05	1e-05	1e-05	1e-05	1e-05	1e-05	1e-05	1e-05	1e-05	1e-05	1e-05	1e-05	1e-05	1e-05	1e-05	1e-05	1e-05	1e-05	1e-05	1e-05	1e-05	1e-05	1e-05
ANO1	1e-05	1e-05	1e-05	1e-05	1e-05	1e-05	1e-05	1e-05	1e-05	1e-05	1e-05	1e-05	1e-05	1e-05	1e-05	1e-05	1e-05	1e-05	1e-05	1e-05	1e-05	1e-05	1e-05	1e-05	1e-05	1e-05	1e-05	1e-05	1e-05	1e-05	1e-05	1e-05	1e-05	1e-05	1e-05	1e-05	1e-05	1e-05	1e-05	1e-05	1e-05	1e-05	1e-05	1e-05	1e-05	1e-05	1e-05	1e-05	1e-05
ANO10	1e-05	1e-05	3.9163	1e-05	1e-05	1e-05	1e-05	1e-05	1e-05	1e-05	1e-05	1e-05	1e-05	1e-05	1e-05	1e-05	1e-05	1e-05	1e-05	1e-05	1e-05	1e-05	1e-05	1e-05	1e-05	1e-05	1e-05	1e-05	1e-05	1e-05	1e-05	1e-05	5.43647	1e-05	1e-05	1e-05	1e-05	1e-05	1e-05	1e-05	1e-05	1e-05	1e-05	1e-05	1e-05	1e-05	1e-05	1e-05	1e-05
ANO6	1e-05	1e-05	1e-05	1e-05	1e-05	1e-05	1e-05	1e-05	1e-05	0.00204379	1e-05	1e-05	1e-05	1e-05	1e-05	0.129507	1e-05	1e-05	1e-05	1e-05	1e-05	1e-05	1e-05	1e-05	1e-05	1e-05	1e-05	1e-05	1e-05	1e-05	1e-05	1e-05	1e-05	1e-05	1e-05	1e-05	1e-05	1e-05	1e-05	1e-05	1e-05	1e-05	1e-05	1e-05	1e-05	1e-05	1e-05	1e-05	1e-05
ANP32A	1.61689	0.17434	1.81437	1.48486	1.75386	12.6348	1.24909	0.529232	0.810129	0.174372	0.544194	0.359522	1.43436	0.544657	0.602981	0.268059	0.60559	1.96555	0.186929	11.928	0.437689	0.547763	1.00189	0.295836	0.789367	0.431245	0.307032	0.787742	0.193342	0.035603	2.0789	0.338295	0.216305	0.310382	0.261904	0.307674	2.27055	0.135471	2.12251	0.26357	0.375026	1.40353	0.544646	1.36878	0.462237	0.526984	0.535118	0.185439	23.6745
ANP32B	0.218349	0.17434	0.644993	0.466776	0.563076	0.404172	0.298417	0.223519	0.389674	0.174372	0.544194	0.280794	0.175134	0.544657	0.193745	0.268059	0.60559	0.485657	0.27667	11.928	0.262537	0.320904	0.372869	0.27042	0.292841	0.266588	0.307032	0.297095	0.193342	0.035603	0.422916	0.338295	0.216305	0.310382	0.261904	0.271115	0.259742	0.135471	0.377523	0.26357	0.375026	0.260612	0.330449	0.365878	0.277896	0.305037	0.401409	0.185439	0.277618
ANP32C	1e-05	1e-05	1e-05	1e-05	1e-05	1e-05	1e-05	1e-05	1e-05	1e-05	1e-05	1e-05	1e-05	1e-05	1e-05	1e-05	1e-05	1e-05	1e-05	11.928	1e-05	1e-05	1e-05	1e-05	1e-05	1e-05	1e-05	1e-05	1e-05	1e-05	1e-05	1e-05	1e-05	1e-05	1e-05	1e-05	1e-05	1e-05	1e-05	1e-05	1e-05	1e-05	1e-05	1e-05	1e-05	1e-05	1e-05	1e-05	1e-05
ANP32D	1e-05	1e-05	1e-05	1e-05	1e-05	1e-05	1e-05	1e-05	1e-05	1e-05	1e-05	1e-05	1e-05	1e-05	1e-05	1e-05	1e-05	1e-05	1e-05	1e-05	1e-05	1e-05	1e-05	1e-05	1e-05	1e-05	1e-05	1e-05	1e-05	1e-05	1e-05	1e-05	1e-05	1e-05	1e-05	1e-05	1e-05	1e-05	1e-05	1e-05	1e-05	1e-05	1e-05	1e-05	1e-05	1e-05	1e-05	1e-05	1e-05
ANP32E	1e-05	1e-05	1e-05	1e-05	1e-05	1e-05	1e-05	1e-05	1e-05	1e-05	1e-05	1e-05	1e-05	1e-05	1e-05	1e-05	1e-05	1e-05	1e-05	1e-05	1e-05	1e-05	1e-05	1e-05	1e-05	0.543575	1e-05	1e-05	1e-05	1e-05	1e-05	1e-05	1e-05	1e-05	1e-05	1e-05	1e-05	1e-05	1e-05	1e-05	1e-05	1e-05	1e-05	1e-05	1e-05	1e-05	1e-05	1e-05	1e-05
ANPEP	0.429644	9.28061	0.296755	4.63011	0.67226	1.03609	4.69402	3.25617	0.425911	1.49486	0.525086	0.937862	0.579416	4.47767	8.38661	3.1479	1.13893	0.198993	0.61081	0.652721	4.56152	0.43996	0.405857	3.65397	6.49147	1.08959	3.88438	3.08069	0.12366	4.0662	0.399243	1.59301	2.32824	2.97448	0.183388	0.785682	2.68664	0.494212	0.374411	0.394007	3.13812	4.35007	0.647196	1.75488	2.60735	3.26279	0.671798	0.925319	0.493908
ANTXR1	1.58173	1.59535	1.28368	0.201451	0.220369	1.76869	0.446231	2.02997	0.0764495	0.846747	0.0869468	1.02309	0.577879	0.251914	2.72759	0.0766393	0.447045	1.43912	0.900525	0.995516	0.0252834	0.246934	0.60218	0.0156811	0.895402	0.374074	1.62477	3.67072	2.46573	0.719394	0.632536	0.766855	1.73781	1.45809	0.106578	1.44465	0.72703	1.15989	0.433907	0.215605	0.618782	1.7862	0.765977	0.592195	0.625922	0.471918	0.465272	2.44749	2.11305
ANTXR2	0.455438	0.0684717	0.382105	0.178769	0.168074	0.19359	0.168826	0.204782	0.0949056	0.139263	0.316327	0.239774	0.159695	0.177052	0.21129	0.218656	0.0827881	0.112675	0.137446	0.297665	0.187607	0.0658453	0.186395	0.163796	0.142028	0.111869	0.16373	0.324165	0.116935	0.143601	0.381416	0.307807	0.131641	0.279641	0.177161	0.131435	0.211724	0.197953	0.158992	0.225242	0.156475	0.161587	0.189202	0.144528	0.637238	0.142202	0.136441	0.16926	0.150717
ANXA1	0.853243	2.54952	2.76675	0.193293	2.58907	0.332253	2.68614	0.124264	2.47853	2.56695	2.91754	0.615277	2.71377	0.0683382	2.77399	2.61719	2.88042	1.19743	8.14377	3.35844	0.916821	2.55642	2.84351	0.0670226	2.75609	2.01106	0.202691	2.65759	2.741	2.20302	2.73757	0.336663	2.52944	2.42704	2.97561	0.371527	0.12443	2.71306	0.32741	2.7388	0.0583052	2.62712	3.79015	0.499082	2.38399	2.91661	1.65899	4.73286	2.94865
ANXA10	7.99122	0.830808	1.40223	3.28068	8.46179	2.55663	5.58802	2.27133	7.55412	1.00951	3.06402	2.45716	1.57907	3.2845	3.90691	3.31261	2.2183	2.7833	0.967577	1.37583	2.69289	2.26546	1.43624	5.40736	2.98121	2.53503	1.77574	3.17662	2.55411	3.91391	2.9687	2.79395	2.38136	8.74887	2.88725	1.88389	0.588295	7.64672	0.695313	4.51762	2.81091	8.53759	5.83354	2.72076	3.02179	7.75241	8.83017	1.75361	2.41447
ANXA11	1e-05	1e-05	1e-05	1e-05	1e-05	0.908308	1e-05	1e-05	1e-05	0.595403	1e-05	1e-05	0.407628	1e-05	1e-05	2.46496	1e-05	0.471863	1e-05	1e-05	1e-05	0.430518	1e-05	1e-05	1e-05	1e-05	0.275246	1e-05	1e-05	0.562463	1e-05	1e-05	1e-05	1e-05	0.979626	1e-05	1e-05	1e-05	1e-05	1e-05	0.113046	1e-05	0.488436	1e-05	1e-05	1e-05	1e-05	1e-05	1e-05
ANXA13	1e-05	0.323635	1e-05	0.539846	0.122159	1e-05	1e-05	1e-05	1e-05	1e-05	1e-05	0.798751	1e-05	1e-05	1e-05	1e-05	1e-05	1e-05	1e-05	1e-05	0.0210808	1e-05	1e-05	0.102481	0.158133	1e-05	0.289006	1e-05	0.260564	1e-05	1e-05	1e-05	1e-05	1e-05	0.700542	1e-05	0.535665	1e-05	0.0339745	0.436585	1e-05	0.307936	1e-05	1e-05	1e-05	1e-05	0.0554745	0.525917	1e-05
ANXA2	0.308541	0.279294	0.246355	0.635459	0.260898	0.337424	0.434769	0.206242	0.812027	0.739399	0.393452	0.0662664	0.340856	0.132045	2.65078	0.346692	1.25105	1.09068	0.909524	1.18875	0.125003	0.0750371	0.944447	0.550778	0.458613	0.106642	0.612833	0.278255	0.432876	0.404569	0.539843	2.53486	0.476438	0.157922	0.738655	0.160651	0.445536	0.742901	0.292616	0.204757	0.056356	0.0886634	0.67943	0.211311	0.484399	0.80738	0.0842759	0.093531	3.03335
ANXA2P2	0.262293	0.291437	0.257066	0.568855	0.272241	0.352095	0.453672	0.188441	0.753772	0.0661837	0.410559	0.0691476	0.355675	0.137786	2.76603	0.361766	0.811007	0.313985	0.766367	0.942256	0.130438	0.0782996	0.894875	0.574725	0.450295	0.111279	0.639478	0.290353	0.363653	0.356188	0.378398	2.62296	0.377531	0.240189	0.197567	0.167635	0.464907	0.409768	0.305339	0.213659	0.198231	0.0925183	0.426642	0.0658559	0.505459	0.144094	0.148239	0.0975976	1.05751
ANXA3	2.2596	2.54952	0.0778716	2.65573	2.58907	2.66382	0.062474	2.46211	2.63341	0.174459	2.91754	2.77789	0.6835	2.55032	2.77399	0.124674	2.88042	2.79442	0.110835	3.35844	2.81914	0.0887743	0.623136	2.27011	2.75609	2.42879	2.58847	2.65759	2.741	2.70796	0.692586	2.865	0.41017	2.42704	2.97561	2.51193	0.199621	2.71306	2.51576	0.211171	0.151768	2.62712	0.499336	2.36968	2.38399	0.0366221	0.144013	2.62817	2.94865
ANXA4	1.5553	0.803668	0.532135	1.39335	2.90752	0.784541	0.978052	0.314586	8.69571	0.887369	2.29029	1.68033	1.0034	0.125367	1.78865	8.44098	1.18196	6.32852	0.831167	0.977226	0.852604	0.142222	0.956881	1.67666	0.181239	0.656564	0.531595	0.870226	1.2535	2.04406	7.18797	0.730172	7.66763	1.53648	0.507755	0.45519	1.53926	6.08804	0.48956	1.46458	4.24849	1.27619	0.840751	0.597883	1.0297	1.34479	1.29189	1.52117	0.0389675
ANXA5	1.09386	1.56312	1.26309	1.0224	1.9766	0.228704	0.0942775	0.872517	1.92337	2.03018	0.995315	0.606014	3.85742	0.0486294	9.84374	0.207652	0.0368859	1.94621	0.132213	1.40321	0.472069	1.15636	0.0831799	0.588508	0.85391	1.11045	26.7849	0.0492138	3.54818	1.12781	0.0933497	0.161831	0.805828	0.646322	2.0588	0.561535	0.891138	1.48013	1.94595	1.11465	2.01364	1.9792	1.24748	0.572034	0.240329	0.641836	0.56012	1.01989	4.82692
ANXA6	1.74634	0.976683	1.98045	2.71156	1.78335	1.40402	1.11293	0.812993	4.84726	0.729745	1.08419	1.05817	0.697603	2.44415	1.34685	2.64769	19.0427	4.18447	1.44283	2.16043	1.5208	1.26945	1.32295	2.95746	2.872	2.59768	1.13298	2.20649	2.94171	1.13889	4.17241	1.00935	4.65477	3.4116	0.980605	1.20467	4.4711	2.95298	3.31412	1.7349	1.04335	1.59444	1.07234	1.83754	1.3558	2.03988	5.26194	0.867544	1.19272
ANXA7	1e-05	1e-05	1e-05	1e-05	1e-05	1e-05	1e-05	1e-05	1e-05	0.637947	1e-05	1e-05	1e-05	1e-05	1e-05	1e-05	1e-05	1e-05	1e-05	1e-05	1e-05	0.644215	1e-05	1e-05	1e-05	1e-05	1e-05	0.134401	1e-05	1e-05	2.68078	1e-05	1e-05	1e-05	1e-05	1e-05	1e-05	1e-05	1e-05	1e-05	1e-05	1e-05	1e-05	1e-05	1e-05	1e-05	0.621101	1e-05	1e-05
ANXA8	1e-05	1e-05	1e-05	1e-05	0.297955	1e-05	1e-05	1e-05	1e-05	1e-05	1e-05	1e-05	1e-05	1e-05	1e-05	1e-05	1e-05	1e-05	1e-05	1e-05	1e-05	1e-05	1e-05	1e-05	1e-05	1e-05	1e-05	1e-05	1e-05	1e-05	1e-05	1e-05	1e-05	1e-05	1e-05	1e-05	1e-05	1e-05	1e-05	1e-05	0.775988	0.0559847	1e-05	1e-05	1e-05	1e-05	1e-05	1e-05	1e-05
ANXA8L1	1e-05	1e-05	1e-05	1e-05	0.297955	1e-05	1e-05	1e-05	1e-05	1e-05	1e-05	1e-05	1e-05	1e-05	1e-05	1e-05	1e-05	1e-05	1e-05	1e-05	1e-05	1e-05	1e-05	1e-05	1e-05	1e-05	1e-05	1e-05	1e-05	1e-05	1e-05	1e-05	1e-05	1e-05	1e-05	1e-05	1e-05	1e-05	1e-05	1e-05	0.775988	0.0559847	1e-05	1e-05	1e-05	1e-05	1e-05	1e-05	1e-05
ANXA9	1e-05	1e-05	1e-05	1e-05	1e-05	1e-05	1e-05	1e-05	1e-05	1e-05	1e-05	1e-05	1e-05	1e-05	1e-05	1e-05	1e-05	1e-05	1e-05	1e-05	1e-05	1e-05	1e-05	1e-05	1e-05	1e-05	1e-05	1e-05	1e-05	1e-05	1e-05	1e-05	1e-05	1e-05	1e-05	1e-05	1e-05	1e-05	1e-05	1e-05	1e-05	1.18423	1e-05	1e-05	1e-05	1e-05	1e-05	1e-05	1e-05
AOC1	6.26422	1e-05	1e-05	1e-05	1e-05	1e-05	1e-05	1e-05	1e-05	2.74442	1e-05	1e-05	1e-05	0.835585	4.62129	1e-05	1e-05	1e-05	0.681342	1e-05	0.9587	1e-05	1e-05	1e-05	1e-05	0.259321	0.483113	1e-05	1e-05	1e-05	1e-05	1e-05	1e-05	1e-05	1.41152	1e-05	4.52014	6.84101	0.756904	1e-05	0.503318	1e-05	1e-05	1e-05	0.359282	1e-05	1e-05	1e-05	1e-05
AOC2	1e-05	1e-05	1e-05	1e-05	1e-05	1e-05	1e-05	0.179595	1e-05	1e-05	1e-05	1e-05	1e-05	1e-05	1e-05	1e-05	0.300655	1e-05	1e-05	0.0961806	1e-05	1e-05	1e-05	0.374437	1e-05	1e-05	1e-05	1e-05	1e-05	1e-05	1e-05	0.185746	1e-05	1e-05	1e-05	1e-05	1e-05	0.196499	0.47498	1e-05	1e-05	1e-05	1e-05	1e-05	1e-05	0.12416	1e-05	1e-05	1e-05
AOC3	0.0919168	1.59039	1.87191	0.284463	0.443961	1.20776	1.06588	0.267627	0.0751974	1.96104	2.24326	0.0266869	1.76441	0.138908	0.202756	2.15063	2.45732	1.41265	0.995628	0.0863159	1.43377	1.37706	2.12635	0.639486	0.140109	0.0917439	2.29254	2.61138	2.49856	1.0002	1.05367	2.87982	1.97074	0.0481891	0.484941	0.129038	0.184934	0.313863	2.01002	1.22548	0.0802389	1.2578	1.73467	1.56556	1.49855	9.15635	0.0726582	0.131105	0.0875541
AOX1	1e-05	1e-05	1e-05	1e-05	1e-05	1e-05	1e-05	1e-05	1e-05	1e-05	1e-05	1e-05	1e-05	0.0169629	1e-05	1e-05	1e-05	1e-05	1e-05	1e-05	1e-05	1e-05	1e-05	1e-05	1e-05	1e-05	1e-05	1e-05	1e-05	1e-05	1e-05	1e-05	1e-05	1e-05	1e-05	1e-05	1e-05	1e-05	1e-05	1e-05	1e-05	1e-05	1e-05	1e-05	1e-05	1e-05	1e-05	1e-05	1e-05
AP1B1	2.2596	1.85567	2.76675	2.65573	0.423562	2.66382	2.68614	0.693134	2.63341	2.56695	0.0240528	2.77789	2.71377	2.55032	2.77399	0.0907993	0.152566	0.143726	2.58955	0.237938	0.0723955	2.55642	2.84351	2.27011	2.75609	0.073961	0.56164	2.65759	0.0664415	0.0703317	0.350941	2.865	2.52944	2.42704	2.97561	2.51193	3.02486	2.71306	0.0316533	2.7388	2.39571	0.0195823	0.0728431	2.36968	2.38399	2.91661	2.77519	0.0231272	2.94865
AP1G1	1e-05	1e-05	1e-05	0.0287553	1e-05	1e-05	1e-05	0.324039	4.96502	0.0121015	0.222798	1e-05	1e-05	1e-05	1e-05	1e-05	1e-05	1e-05	1e-05	1e-05	1e-05	1e-05	1e-05	1e-05	1e-05	1e-05	1e-05	0.379786	1e-05	1e-05	1e-05	1e-05	1e-05	1e-05	1e-05	1e-05	1e-05	1e-05	1e-05	1e-05	1e-05	1e-05	1e-05	0.442112	0.407216	1e-05	1e-05	1e-05	1e-05
AP1G2	1e-05	1e-05	1e-05	1e-05	1e-05	1e-05	1e-05	1e-05	1e-05	1e-05	1e-05	1e-05	1e-05	1e-05	1e-05	1e-05	1e-05	1e-05	1e-05	1e-05	1e-05	1e-05	1e-05	1e-05	1e-05	1e-05	1e-05	1e-05	1e-05	1e-05	1e-05	1e-05	1e-05	1e-05	1e-05	1e-05	1e-05	1e-05	1e-05	1e-05	1e-05	1e-05	1e-05	1e-05	1e-05	1e-05	1e-05	1e-05	1e-05
AP1M1	1e-05	1e-05	1e-05	1e-05	1e-05	1.96776	1e-05	1e-05	1e-05	1e-05	1e-05	1e-05	1e-05	1e-05	1e-05	0.73941	1e-05	1.4064	1e-05	1e-05	1e-05	1e-05	1e-05	1e-05	1.10202	1.3705	1e-05	1e-05	1e-05	1e-05	1e-05	1e-05	1e-05	1e-05	1e-05	1e-05	1e-05	1e-05	1e-05	1e-05	1e-05	1e-05	1e-05	1e-05	0.124014	1e-05	1e-05	1e-05	0.0451919
AP1M2	1e-05	1e-05	1e-05	0.164483	0.358953	1.90217	1e-05	1e-05	1e-05	1e-05	1e-05	1e-05	1e-05	1e-05	0.406968	0.714763	0.365004	1.35952	1e-05	1e-05	1e-05	1e-05	1e-05	1e-05	1.06529	2.13196	1e-05	1e-05	1e-05	1e-05	0.149202	1e-05	1e-05	1e-05	1e-05	1e-05	1e-05	1e-05	0.147548	1e-05	0.28937	0.220642	1e-05	1e-05	1e-05	1e-05	1e-05	1e-05	0.0436855
AP1S1	1e-05	1e-05	1e-05	1e-05	1e-05	1e-05	1e-05	1e-05	1e-05	1e-05	1e-05	1e-05	1e-05	1e-05	1e-05	1e-05	1e-05	1e-05	1e-05	1e-05	1e-05	1e-05	1e-05	1e-05	1e-05	1e-05	1e-05	1e-05	1e-05	1e-05	1e-05	1e-05	1e-05	1e-05	1e-05	1e-05	1e-05	1e-05	1e-05	1e-05	1e-05	1e-05	1e-05	1e-05	1e-05	1e-05	1e-05	1e-05	1e-05
AP1S2	1e-05	1e-05	1e-05	1e-05	1e-05	1e-05	1e-05	1e-05	1e-05	1e-05	1e-05	1e-05	1e-05	1e-05	1e-05	1e-05	0.362658	1e-05	1e-05	1e-05	1e-05	1e-05	1e-05	1e-05	1e-05	1e-05	1e-05	1e-05	1e-05	1e-05	1e-05	1e-05	1e-05	1e-05	1e-05	1e-05	1e-05	1e-05	1e-05	1e-05	1e-05	1e-05	1e-05	1e-05	1e-05	1e-05	1e-05	1e-05	1e-05
AP2A1	1.34124	0.412687	1.07781	1.70384	0.323713	2.62923	1.45002	3.16414	0.145137	1.29451	1.69238	1.28644	1.96455	1.47217	1.67431	3.34846	0.00476615	1.45543	1.1813	1.61849	2.14604	1.76129	1.32255	1.8012	1.48759	1.62113	1.61562	0.362829	0.688658	2.67983	2.12886	0.563191	1.43105	3.4016	0.216977	1.19035	2.26812	1.76353	1.60254	0.107442	0.849522	2.38828	1.12986	1.22314	1.66734	1.74369	1.27008	0.127486	0.444489
AP2A2	0.388203	0.441148	0.11926	0.0163525	0.346038	0.841077	1.55002	2.2327	0.155146	0.398783	0.469298	1.37516	0.680126	1.48412	0.37677	3.57939	0.461487	0.387762	0.513701	0.472451	0.818053	2.17155	1.38093	1.92542	0.532357	0.545483	0.811726	0.878703	0.112603	2.21995	0.402475	0.602032	0.224144	2.34504	0.231941	0.705988	0.350675	0.334354	1.71306	0.114851	0.400147	1.14725	1.18815	0.673021	0.0948185	1.86394	0.0243203	0.136278	0.475144
AP2B1	0.324836	1.85567	0.269346	0.502553	0.423562	1.58515	0.252675	1.93631	0.492771	3.56224	0.0240528	0.147495	0.0789761	0.644448	0.433216	1.15239	1.9223	0.288218	0.404779	0.571926	0.103586	0.12697	0.358044	0.552457	1.95979	0.073961	0.56164	0.311448	0.210304	0.0351503	0.515487	1.92911	0.32241	0.40664	0.611222	0.225661	0.300032	2.09522	0.689023	0.125444	0.0233627	0.0195823	0.167817	0.216595	0.168026	0.345423	0.049595	0.0231272	0.40234
AP2M1	0.175622	0.215733	1e-05	1e-05	6.19242	1e-05	1e-05	1e-05	1e-05	0.56735	1e-05	1e-05	1e-05	1e-05	1e-05	1e-05	1e-05	0.639625	1e-05	0.362439	1e-05	1.33708	0.604169	1e-05	1e-05	1e-05	1e-05	1.15558	1e-05	1.12318	1e-05	1e-05	1e-05	1e-05	1e-05	4.58938	1e-05	1.43619	1e-05	1e-05	1e-05	1e-05	1e-05	1e-05	1e-05	1e-05	1e-05	1.22674	1e-05
AP2S1	1e-05	1e-05	1e-05	1e-05	1e-05	0.946354	1e-05	3.53537	11.3958	1e-05	1e-05	1.06984	1e-05	0.969853	1e-05	1e-05	1e-05	1e-05	1e-05	1e-05	1e-05	2.35652	1e-05	1e-05	0.529073	1e-05	1e-05	1e-05	1e-05	0.768936	1e-05	1e-05	1e-05	1e-05	1e-05	1e-05	1e-05	1e-05	1e-05	1e-05	1e-05	1e-05	1e-05	1e-05	1e-05	1e-05	1e-05	1e-05	4.4382
AP3B1	2.2596	0.131755	1.92011	1.70217	2.58907	2.66382	2.68614	2.46211	0.252047	2.56695	0.0325881	0.854563	2.71377	2.55032	2.77399	2.61719	2.88042	2.79442	2.58955	0.0391936	1.08224	0.143996	2.84351	0.190736	2.75609	2.42879	0.274172	2.65759	2.741	2.70796	2.73757	2.865	2.52944	0.0376376	2.97561	0.437554	0.792373	2.71306	0.10324	2.7388	2.39571	2.62712	4.53873	2.36968	2.38399	2.91661	2.77519	2.62817	2.94865
AP3B2	1e-05	1e-05	1e-05	1e-05	1e-05	1e-05	1e-05	1e-05	1e-05	1e-05	1e-05	1e-05	1e-05	1e-05	1e-05	1e-05	1e-05	1e-05	1e-05	1e-05	1e-05	1e-05	1e-05	1e-05	1e-05	0.0425878	0.0231043	1e-05	1e-05	1e-05	1e-05	1e-05	1e-05	1e-05	1e-05	1e-05	1e-05	1e-05	1e-05	1e-05	1e-05	1e-05	1e-05	1e-05	1e-05	1e-05	1e-05	1e-05	1e-05
AP3D1	1e-05	1e-05	1e-05	1e-05	1e-05	1e-05	1.15297	0.0626304	1e-05	1e-05	1e-05	0.292891	1e-05	0.159859	1e-05	1e-05	0.0088369	1e-05	1e-05	1e-05	1e-05	1e-05	0.163144	1e-05	1.29951	1e-05	1e-05	0.0163526	1e-05	1e-05	1e-05	1e-05	1e-05	1e-05	1e-05	0.106874	0.0659826	1e-05	1e-05	1.34199	1e-05	1e-05	1e-05	1e-05	1e-05	0.105629	1e-05	0.0288576	1e-05
AP3M1	1e-05	1e-05	4.81693	1e-05	1e-05	1.04381	1e-05	1e-05	1e-05	1e-05	1e-05	1e-05	1e-05	1e-05	1e-05	1e-05	1e-05	1e-05	1e-05	1e-05	0.0980623	1e-05	1e-05	1e-05	2.47125	0.398286	1e-05	1e-05	0.287933	1e-05	1e-05	1e-05	1e-05	0.0252755	1e-05	3.63622	4.3362	1.92193	1e-05	1e-05	1e-05	1e-05	1e-05	1e-05	1.29752	1e-05	1e-05	1e-05	1e-05
AP3M2	1e-05	1e-05	1e-05	0.642297	1e-05	1e-05	1e-05	1e-05	1e-05	1e-05	1e-05	1e-05	1e-05	1e-05	1e-05	1e-05	1e-05	1e-05	0.285723	1e-05	1e-05	1e-05	1e-05	1e-05	1e-05	1e-05	1e-05	1e-05	1e-05	1e-05	1e-05	1e-05	1e-05	1e-05	1e-05	1e-05	1e-05	1e-05	1e-05	1e-05	1e-05	1e-05	1e-05	1e-05	1e-05	1e-05	1e-05	1e-05	1e-05
AP3S1	1e-05	1e-05	1e-05	1e-05	1e-05	1e-05	1e-05	1e-05	1e-05	1e-05	1e-05	1e-05	1e-05	1e-05	1e-05	1e-05	1e-05	1e-05	1e-05	0.430093	1e-05	1e-05	1e-05	1e-05	1e-05	1e-05	1e-05	1e-05	1e-05	1e-05	1e-05	1e-05	1e-05	1e-05	1e-05	1e-05	1e-05	1e-05	1e-05	1e-05	1e-05	1e-05	1e-05	1e-05	1e-05	1e-05	1e-05	1e-05	1e-05
AP4B1	1e-05	1e-05	1e-05	1e-05	1e-05	1e-05	1e-05	1e-05	1e-05	1e-05	1e-05	1e-05	1e-05	1e-05	1e-05	1e-05	1e-05	1e-05	1e-05	1e-05	1e-05	1e-05	1e-05	1e-05	1e-05	1e-05	1e-05	1e-05	1e-05	1e-05	1e-05	1e-05	1e-05	1e-05	1e-05	1e-05	1e-05	1e-05	1e-05	1e-05	1e-05	1e-05	1e-05	1e-05	1e-05	1e-05	1e-05	1e-05	1e-05
AP4E1	1e-05	1e-05	1e-05	1e-05	1e-05	1e-05	1e-05	1e-05	1e-05	1e-05	1e-05	0.452739	1e-05	1e-05	1e-05	1e-05	1e-05	1e-05	1e-05	1e-05	1e-05	1e-05	1e-05	1e-05	1e-05	1e-05	1e-05	1e-05	1e-05	1e-05	1e-05	1e-05	1e-05	1e-05	1e-05	1e-05	1e-05	1e-05	0.922312	1e-05	1e-05	1e-05	1e-05	1e-05	1e-05	1e-05	1e-05	1e-05	1e-05
AP4S1	1e-05	1e-05	1e-05	1e-05	1e-05	1e-05	1e-05	1e-05	1e-05	1e-05	1e-05	1e-05	1e-05	1e-05	1e-05	1e-05	1e-05	1e-05	1e-05	1e-05	1e-05	1e-05	1e-05	1e-05	1e-05	1e-05	1e-05	1e-05	1e-05	1e-05	1e-05	1e-05	1e-05	1e-05	1e-05	1e-05	1e-05	1e-05	1e-05	1e-05	1e-05	1e-05	1e-05	1e-05	1e-05	1e-05	1e-05	1e-05	1e-05
AP5B1	1e-05	1e-05	1e-05	1e-05	1e-05	1e-05	1e-05	1e-05	1e-05	1e-05	1e-05	1e-05	1e-05	1e-05	1e-05	1e-05	1e-05	1e-05	1e-05	1e-05	1e-05	1e-05	1e-05	1e-05	1e-05	1e-05	1e-05	1e-05	1e-05	1e-05	1e-05	1e-05	1e-05	1e-05	1e-05	1e-05	1e-05	1e-05	1e-05	1e-05	1e-05	1e-05	1e-05	1e-05	1e-05	1e-05	1e-05	1e-05	1e-05
AP5Z1	1e-05	1e-05	1e-05	1e-05	1e-05	1e-05	1e-05	1e-05	1e-05	1e-05	1e-05	1e-05	1e-05	1e-05	1e-05	1e-05	1e-05	1e-05	1e-05	1e-05	1e-05	1e-05	1e-05	1e-05	1e-05	1e-05	1e-05	1e-05	1e-05	1e-05	1e-05	1e-05	1e-05	1e-05	1e-05	1e-05	1e-05	1e-05	1e-05	1e-05	1e-05	1e-05	1e-05	1e-05	1e-05	1e-05	1e-05	1e-05	1e-05
APAF1	1e-05	1e-05	1e-05	1e-05	1e-05	1e-05	1e-05	1e-05	1e-05	1e-05	1e-05	1e-05	1e-05	1e-05	1e-05	1e-05	1e-05	1e-05	1e-05	1e-05	1e-05	1e-05	1e-05	1e-05	1e-05	1e-05	1e-05	1e-05	1e-05	1e-05	1e-05	1e-05	1e-05	1e-05	1e-05	1e-05	1e-05	1e-05	1e-05	1e-05	1e-05	1e-05	1e-05	1e-05	1e-05	1e-05	1e-05	1e-05	1e-05
APBB1	1e-05	1e-05	1e-05	1e-05	1e-05	1e-05	1e-05	1e-05	1e-05	1e-05	1e-05	1e-05	0.462365	1e-05	1e-05	1e-05	1e-05	1e-05	1e-05	1e-05	1e-05	1e-05	1e-05	1e-05	1e-05	1e-05	0.280867	1e-05	1e-05	1e-05	0.360067	1e-05	1e-05	1e-05	1e-05	1e-05	1e-05	0.316845	1e-05	1e-05	1e-05	1e-05	1e-05	1e-05	1e-05	1e-05	1e-05	0.150743	1e-05
APBB1IP	1e-05	1e-05	1e-05	1e-05	0.0522109	1e-05	1e-05	1e-05	0.0481191	1e-05	1e-05	1e-05	1e-05	1e-05	1e-05	1e-05	1e-05	1e-05	1e-05	1e-05	1.45141	0.334197	1e-05	1e-05	1e-05	1e-05	1e-05	1e-05	1e-05	1e-05	1e-05	1e-05	1e-05	1e-05	1e-05	1e-05	1e-05	1e-05	0.736485	1e-05	1e-05	1e-05	1e-05	1e-05	1e-05	1e-05	0.0869943	1e-05	1e-05
APBB2	1e-05	1e-05	1e-05	1e-05	1e-05	1e-05	1e-05	1e-05	1e-05	1e-05	1e-05	1e-05	1e-05	1e-05	1e-05	1e-05	1e-05	1e-05	1e-05	1e-05	1e-05	1e-05	1e-05	1e-05	1e-05	1e-05	1e-05	1e-05	1e-05	1e-05	1e-05	1e-05	1e-05	1e-05	1e-05	1e-05	1e-05	1e-05	1e-05	1e-05	1e-05	1e-05	1e-05	1e-05	1e-05	1e-05	1e-05	1e-05	1e-05
APCS	32.0048	65.1017	218.521	46.347	48.1718	80.1475	27.2816	32.3512	48.9249	22.4369	92.0638	48.3578	94.38	57.8909	50.1947	36.6877	112.373	68.3603	85.4948	79.7276	37.7599	53.018	23.213	27.3825	62.665	67.7645	24.2206	27.7577	31.9884	58.8857	65.8742	31.9968	38.2134	50.7492	58.9991	68.4198	60.6221	64.2684	28.1114	46.8757	36.4378	90.5349	36.7681	89.4482	50.2345	38.1407	47.3719	34.0022	34.3086
APEH	6.67452	0.190903	2.33099	0.320292	0.535757	0.987222	0.47361	0.300883	0.386319	0.804769	1.82938	0.308892	8.0082	0.545817	0.624853	0.28388	0.432902	0.162549	0.447221	1.82071	0.134033	0.416801	1.01143	0.263769	0.483548	0.0384303	0.52513	0.465141	0.344133	0.319837	0.321922	7.08127	0.581327	0.468992	0.0284688	9.40471	2.86115	0.310633	0.106615	0.385247	0.54393	1.36485	4.46599	0.0709014	0.128491	0.19795	0.501891	0.0767215	0.610864
APEX1	7.89788	14.4273	15.0895	8.57395	8.88153	15.8436	6.96037	9.27963	13.872	10.9552	16.3665	0.657668	19.3761	9.85308	15.9215	7.61305	16.4665	12.4602	20.9867	5.05347	8.94072	0.664343	8.21964	23.275	8.6933	6.2748	8.34717	7.25256	3.48711	7.4047	10.7885	9.27343	9.45519	17.1259	13.2563	3.54973	21.7935	29.0249	12.3273	9.65562	13.3755	19.2154	10.1626	10.9242	13.3774	1.22932	7.98203	6.21101	7.13457
API5	1e-05	1e-05	1.70229	1e-05	1e-05	1e-05	1e-05	1e-05	1e-05	1e-05	1e-05	0.0663783	1e-05	1e-05	1e-05	1e-05	1e-05	1e-05	1e-05	1e-05	1e-05	1e-05	1e-05	1e-05	1e-05	1e-05	1e-05	1e-05	1e-05	0.719337	1e-05	0.690025	1e-05	0.249533	1e-05	1e-05	1e-05	1e-05	1e-05	1e-05	1e-05	1e-05	1e-05	1e-05	1e-05	1e-05	1e-05	1e-05	1e-05
APIP	1e-05	1e-05	1e-05	1e-05	1e-05	1e-05	1e-05	1e-05	1e-05	1e-05	1e-05	1e-05	1e-05	1e-05	1e-05	1e-05	1e-05	1e-05	1e-05	1e-05	1e-05	1e-05	1e-05	1e-05	1e-05	1e-05	1e-05	1e-05	1e-05	1e-05	1e-05	1e-05	1e-05	1e-05	1e-05	1e-05	1e-05	1e-05	1e-05	1e-05	1e-05	1e-05	1e-05	1e-05	1e-05	1e-05	1e-05	1e-05	1e-05
APLP1	1.16777	4.71377	0.318217	0.19959	0.377706	0.423269	0.225154	0.0888316	0.296487	4.71986	0.299091	1.03468	0.305465	0.0845847	0.0556655	0.0759283	0.400914	0.135086	0.227436	3.60015	3.76175	0.743137	0.419662	0.676288	0.394773	2.97763	0.0750247	0.212798	0.273503	0.125576	7.42713	0.822806	3.60559	0.250848	0.261442	0.257812	0.0630896	0.111257	0.0701067	0.304419	0.0445062	5.49073	6.85244	0.133792	0.303661	4.39302	1.11966	0.0161785	4.26809
APLP2	0.127867	0.196969	0.119586	0.168331	0.0795805	0.180053	0.243691	0.164454	0.145392	0.124765	0.11157	0.142821	0.104553	0.050589	0.0718485	0.140688	0.156628	0.143766	0.1547	0.224789	0.0869183	0.104208	0.144631	0.503477	0.180892	0.188695	0.15552	0.159078	0.125329	0.13906	0.165164	0.0762741	0.153495	0.30646	0.146188	0.0985446	0.13808	0.105956	0.190363	0.037233	0.199142	0.134468	0.237068	0.0768825	0.163744	0.128837	0.240831	0.126701	0.395374
APMAP	40.0708	25.9872	36.5879	53.3529	2.87541	2.08691	3.65406	0.592603	1.48069	33.7456	0.230941	0.0292868	40.6919	0.232801	0.760796	0.819984	1.16934	0.543413	0.455645	1.31176	38.6948	1.53402	130.745	1.36688	1.69751	36.8297	5.08862	2.96398	0.886812	0.644003	40.1012	55.1365	0.357283	0.798671	30.215	1.10309	28.7755	0.0918752	2.20285	1.39265	4.53497	45.9613	42.687	0.271334	2.19074	0.460916	0.17206	2.24816	0.58653
APOA1	5295.05	8400.44	5441.78	7274.98	6289.27	5473.09	7684.79	8687.45	7534.63	7011.81	5909.66	7372.07	6282.8	5836.69	11626.9	6694.1	7030.45	6562.98	5304.64	7451.46	6986.57	8079.03	8270.74	7975.05	6318.57	7240.32	7752.68	7261.94	6315.41	6861.93	7282.86	7181.13	6733.61	7054.66	7898.93	4818.54	7724.39	8261.91	6586.58	7458.55	8615.95	5691.69	7671.44	7127.72	6894.39	6729.65	6760.21	7030.49	7387.34
APOA2	1374.91	2341.23	2261.64	2158.28	1842.8	2012.7	2207.73	1806.6	2628.74	1812.64	1924.68	2429.74	2458.49	2059.46	2749.94	3076.54	2647.33	2186.36	1728.84	2740.16	3107.73	2303.42	1848.71	2053.71	1925.16	2632.69	2145.53	2093.32	1865.16	2104.37	2319.53	2142.12	2029.62	1864.15	2536.4	1574.61	1750.78	1801.03	1867.18	2275.76	1356.68	2539.11	2528.52	2266.9	2322.26	2254.17	1704.49	2115.31	2488.76
APOA4	253.636	186.446	208.245	379.101	266.552	254.376	324.765	294.713	318.06	226.935	135.683	215.387	307.075	219.231	259.596	181.271	163.563	275.284	224.124	164.709	255.438	245.713	176.732	210.128	219.134	224.282	229.171	253.223	271.692	270.213	306.035	293.59	204.949	176.902	275.368	238.633	294.825	340.17	186.164	339.765	305.521	211.062	329.651	232.627	272.117	278.59	234.149	312.116	344.716
APOA5	1e-05	1e-05	1e-05	1e-05	1e-05	1e-05	1e-05	1e-05	1e-05	1e-05	1e-05	1e-05	1e-05	1e-05	0.277482	1e-05	0.0901292	1e-05	1e-05	1e-05	1e-05	1e-05	1e-05	1e-05	0.132902	0.147557	0.0430952	1e-05	1e-05	1e-05	0.106897	0.115724	1e-05	1e-05	1e-05	1e-05	0.193266	1e-05	1e-05	1e-05	0.133893	1e-05	1e-05	1e-05	1e-05	1e-05	1e-05	1e-05	1e-05
APOB	84.0363	79.0942	122.618	116.195	82.2979	98.8441	93.3152	67.2454	116.512	69.8002	105.365	94.5574	116.792	126.829	119.3	93.8769	103.323	93.4434	102.266	107.328	130.377	84.6983	64.5183	88.2999	86.6487	67.5911	80.6971	81.2812	74.5781	110.08	98.5377	72.2534	73.2923	94.3203	83.1755	91.5171	110.644	79.0826	75.6164	103.327	111.707	121.983	65.4399	75.3185	85.7585	85.0119	55.2439	78.0503	102.281
APOBEC3A	1e-05	1e-05	1e-05	1e-05	1e-05	1e-05	1e-05	1e-05	1.52812	1e-05	1e-05	1e-05	1e-05	1e-05	1e-05	1e-05	1e-05	1e-05	1e-05	1e-05	1e-05	1e-05	1e-05	1e-05	1e-05	1e-05	1e-05	1e-05	1e-05	1e-05	1e-05	1e-05	1e-05	1e-05	1e-05	1e-05	1e-05	1e-05	1e-05	1e-05	1e-05	1e-05	2.04475	1e-05	1e-05	1e-05	1e-05	1e-05	1e-05
APOBEC3B	0.0861645	1e-05	1e-05	1e-05	1e-05	1e-05	1e-05	1e-05	0.930159	1e-05	1e-05	1e-05	1e-05	1e-05	1e-05	1e-05	1e-05	1e-05	1e-05	1e-05	1e-05	1e-05	1e-05	1e-05	0.080368	1e-05	1e-05	1e-05	1e-05	1e-05	1e-05	1e-05	1e-05	1e-05	1e-05	1e-05	1e-05	1e-05	1e-05	1e-05	1e-05	1e-05	1.24463	1e-05	1e-05	1e-05	1e-05	1e-05	1e-05
APOBEC3C	1e-05	1e-05	1e-05	1e-05	1e-05	1e-05	1e-05	1e-05	1e-05	1e-05	1e-05	1e-05	1e-05	1e-05	1e-05	1e-05	1e-05	1e-05	1e-05	1e-05	1e-05	1e-05	1e-05	1e-05	1e-05	1e-05	1e-05	1e-05	1e-05	1e-05	1e-05	1e-05	1e-05	1e-05	1e-05	1e-05	1e-05	1e-05	1e-05	1e-05	1e-05	1e-05	1e-05	1e-05	1e-05	1e-05	1e-05	1e-05	1e-05
APOBEC3D	0.0943706	1e-05	1e-05	1e-05	1e-05	1e-05	1e-05	1e-05	1e-05	1e-05	1e-05	1e-05	1e-05	1e-05	1e-05	1e-05	1e-05	1e-05	1e-05	1e-05	1e-05	1e-05	1e-05	1e-05	0.088022	1e-05	1e-05	1e-05	1e-05	1e-05	1e-05	1e-05	1e-05	1e-05	1e-05	1e-05	1e-05	1e-05	1e-05	1e-05	1e-05	1e-05	1e-05	1e-05	1e-05	1e-05	1e-05	1e-05	1e-05
APOBEC3F	1e-05	1e-05	1e-05	1e-05	1e-05	1e-05	1e-05	1e-05	1e-05	1e-05	1e-05	1e-05	1e-05	1e-05	1e-05	1e-05	1e-05	1e-05	1e-05	1e-05	1e-05	1e-05	1e-05	1e-05	1e-05	1e-05	1e-05	1e-05	0.108505	1e-05	1e-05	1e-05	1e-05	1e-05	1e-05	0.226928	1e-05	1e-05	1e-05	1e-05	1e-05	1e-05	1e-05	1e-05	1e-05	1e-05	1e-05	1e-05	1e-05
APOBEC3G	1e-05	1e-05	1e-05	1e-05	1e-05	1e-05	1e-05	1e-05	1e-05	0.255227	1e-05	1e-05	1e-05	1e-05	1e-05	1e-05	1e-05	1e-05	1e-05	1e-05	1e-05	1e-05	1e-05	1.04095	1e-05	1e-05	1e-05	1e-05	1e-05	1e-05	1e-05	1e-05	1e-05	1e-05	1e-05	1e-05	1e-05	1e-05	1e-05	1e-05	1e-05	1e-05	1e-05	1e-05	1e-05	1e-05	1e-05	1e-05	1e-05
APOBR	1e-05	0.17626	1e-05	1e-05	1e-05	1e-05	0.120537	1e-05	1e-05	1e-05	0.28689	1e-05	1e-05	0.197848	1e-05	0.147732	1e-05	1e-05	0.149077	0.118925	1e-05	1e-05	0.421615	1e-05	1e-05	1e-05	0.0440803	0.0955337	1e-05	0.049659	1e-05	1e-05	1e-05	0.223592	1e-05	1e-05	0.137159	1e-05	1e-05	1e-05	1e-05	1e-05	0.187772	1e-05	1e-05	1e-05	1e-05	1e-05	1e-05
APOC1	379.908	543.207	548.916	382.013	325.94	408.809	780.439	527.325	661.741	414.48	356.392	155.346	756.847	452.574	947.596	678.208	580.894	325.45	336.904	666.433	741.653	623.494	349.89	516.639	556.896	571.06	339.426	844.537	340.332	476.647	591.559	492.474	528.118	520.045	415.318	236.421	463.886	688.885	610.684	708.124	546.131	675.793	547.757	594.727	509.044	385.453	366.388	369.325	332.625
APOC2	121.348	163.242	308.244	182.442	201.728	160.546	251.553	139.941	227.319	134.748	235.241	227.654	217.163	214.734	266.441	243.399	172.893	173.114	140.241	168.692	334.233	151.663	151.231	266.445	155.272	240.649	198.31	218.284	235.067	133.723	172.454	155.817	237.921	164.905	137.365	145.866	255.895	188.727	144.304	230.831	239.669	320.798	134.533	228.575	149.935	257.016	102.777	195.254	233.767
APOC3	364.049	502.643	745.542	539.163	491.895	564.922	860.257	524.218	743.048	372.174	332.716	449.683	639.842	569.266	1295.66	619.75	654.09	605.272	402.299	436.469	1186.13	682.517	450.401	775.8	625.096	506.916	822.763	849.792	555.444	573.562	370.675	356.37	593.145	586.165	566.541	348.799	471.257	587.747	588.157	756.083	940.559	784.364	530.781	696.724	451.436	443.747	451.45	482.044	772.972
APOC4	11.2115	13.0822	20.1596	16.6434	17.9941	11.7032	23.7343	8.8428	17.2522	11.3666	4.21883	9.40634	18.9502	15.8353	16.6137	18.4691	13.2088	12.2379	7.62273	23.2498	27.8503	10.7798	8.24834	6.69774	9.80146	10.1239	15.4828	16.8062	11.1629	13.3972	14.2769	7.87083	8.86637	9.79041	9.97428	15.6249	9.99111	19.4941	11.6771	16.8965	10.3039	24.5949	9.68348	16.5815	9.10318	11.637	8.07002	13.4041	13.8806
APOD	53.9301	68.8958	66.0634	51.5749	41.7377	43.6028	81.1548	44.7958	59.6915	43.7226	42.2566	63.0644	56.5885	54.5759	64.4682	43.1964	57.7274	66.7207	33.1654	107.265	48.9846	54.3657	48.661	48.0255	50.7225	54.1684	53.7487	99.1773	37.8973	57.6624	67.0355	65.0843	63.7424	43.6663	59.4019	28.9759	62.1536	60.7857	52.0225	51.4043	66.2884	53.468	56.0773	48.7519	64.6921	71.0921	57.0043	59.5294	58.3486
APOE	138.363	181.954	210.148	218.335	321.912	130.514	241.225	166.734	205.95	192.763	183.263	190.648	231.027	237.495	320.104	162.473	157.703	161.487	121.134	184.223	216.457	169.643	206.839	306.409	136.418	181.585	256.423	177.248	213.512	232.639	252.108	188.99	208.694	166.604	194.988	106.267	221.264	215.1	139.009	201.064	246.678	229.132	166.806	260.493	196.847	281.863	172.892	209.22	254.969
APOF	5.1482	7.65606	3.4358	7.863	8.02266	4.72126	4.44014	3.66843	7.10141	8.08547	3.55535	4.16624	10.6429	4.45083	8.12126	4.62156	3.92047	4.67935	5.37449	4.45003	3.73325	5.91291	7.62896	4.76231	2.79419	3.22449	5.11658	5.35373	8.79023	5.02185	4.59339	2.68765	4.75593	3.34938	5.91515	5.78216	4.85166	4.96358	3.9354	3.63594	5.68046	10.7451	12.6513	4.63232	5.28482	3.6141	10.1664	5.82642	5.5123
APOH	29.6226	42.2923	81.0426	37.7246	63.7729	73.2321	31.5401	38.3946	50.5101	25.46	35.9372	75.4555	65.0286	38.5833	54.3669	50.1193	38.346	67.6358	41.1198	43.3208	76.5032	57.7335	79.0479	43.8127	32.9942	39.9879	32.6994	37.9633	49.3907	30.6593	38.0455	43.2747	35.5972	37.999	79.7309	77.2514	47.0982	49.2506	63.1481	33.6081	49.7912	39.5829	55.86	54.695	36.757	66.8396	65.6752	58.8515	30.9394
APOL1	14.5714	33.3905	45.485	41.3949	27.7024	43.3075	24.5407	19.4136	35.858	25.9329	15.7611	17.6024	16.9927	36.6162	28.1039	30.4289	31.8781	34.7353	16.3565	23.2792	26.1748	48.3649	28.9745	22.2526	34.2865	23.4906	26.8262	27.3898	23.5261	21.4349	36.9286	23.6836	25.6372	23.8795	20.2694	23.3451	33.4396	26.2787	25.7869	30.4726	27.9124	35.0839	20.7097	26.7671	33.0755	30.191	31.0804	23.5216	28.5784
APOL2	1e-05	1e-05	1e-05	1e-05	1e-05	1e-05	0.044733	1e-05	1e-05	1e-05	1e-05	1e-05	1e-05	1e-05	1e-05	1e-05	1e-05	1e-05	1e-05	1e-05	1e-05	1e-05	1e-05	1e-05	0.0998721	1e-05	1e-05	1e-05	1e-05	1e-05	1e-05	1e-05	1e-05	1e-05	1e-05	1e-05	1e-05	1e-05	1e-05	1e-05	1e-05	1e-05	1e-05	1e-05	1e-05	1e-05	1e-05	0.0972893	1e-05
APOL3	1e-05	1e-05	1e-05	1e-05	1e-05	1e-05	1e-05	1e-05	1e-05	1e-05	1e-05	1e-05	1e-05	1e-05	1e-05	1e-05	1e-05	1e-05	1e-05	1e-05	1e-05	1e-05	1e-05	1e-05	1e-05	1e-05	1e-05	1e-05	1e-05	1e-05	1e-05	1e-05	1e-05	1e-05	1e-05	1e-05	1e-05	1e-05	1e-05	1e-05	1e-05	1e-05	1e-05	1e-05	1e-05	1e-05	1e-05	1e-05	1e-05
APOM	33.6262	40.876	44.734	45.428	38.9671	43.4308	60.9432	41.6511	77.6255	35.4349	67.3666	42.084	47.6428	42.7321	66.5049	38.3197	46.9767	52.1528	55.7704	42.0978	52.4598	51.7515	44.0896	52.3801	74.9167	50.1491	69.7168	62.7557	44.9887	49.1266	26.3047	35.7861	62.5732	54.1114	35.8096	32.46	65.4356	47.4263	30.4205	41.0725	44.9203	45.7839	58.2068	35.3761	38.4388	69.5081	57.5172	50.5361	76.9748
APOO	1e-05	1e-05	1e-05	1e-05	1e-05	1e-05	1e-05	1e-05	1e-05	1e-05	0.300523	1.92083	1e-05	1e-05	1e-05	1e-05	1e-05	1e-05	1e-05	1e-05	1e-05	1.57286	1e-05	1e-05	1e-05	1e-05	2.83224	1e-05	1e-05	0.272951	1e-05	1e-05	1e-05	1e-05	1e-05	1e-05	0.291884	1e-05	1e-05	4.39755	7.19734	1e-05	0.446593	1e-05	1e-05	1e-05	1e-05	1e-05	1e-05
APOOL	1e-05	1e-05	1e-05	1e-05	1e-05	1e-05	1e-05	1e-05	1e-05	1e-05	1e-05	1e-05	1e-05	1e-05	1e-05	1e-05	1e-05	1e-05	1e-05	1e-05	1e-05	1e-05	1e-05	1e-05	1e-05	1e-05	1e-05	1e-05	1e-05	1e-05	1e-05	1e-05	1e-05	1e-05	1e-05	1e-05	1e-05	1e-05	1e-05	1e-05	1e-05	1e-05	1e-05	1e-05	1e-05	1e-05	1e-05	1e-05	1e-05
APP	0.0308315	2.54952	2.76675	2.65573	2.58907	2.66382	2.68614	2.46211	2.63341	2.13264	2.91754	2.77789	0.0474654	2.55032	2.77399	2.61719	2.88042	2.79442	2.58955	1.04632	2.81914	0.0988649	0.171239	2.27011	0.019761	2.42879	0.503956	2.65759	2.741	2.70796	2.73757	2.865	0.0357075	0.104092	0.19293	0.0114076	0.0427968	2.71306	2.51576	2.7388	0.0304927	2.62712	2.8486	0.35542	0.0160279	2.91661	2.77519	2.62817	2.94865
APPL1	1e-05	0.0960467	1e-05	1e-05	1e-05	1e-05	1e-05	1e-05	0.0753255	1e-05	1e-05	1e-05	1e-05	1e-05	1e-05	1e-05	1e-05	1e-05	0.162219	1e-05	1e-05	1e-05	1e-05	1e-05	1e-05	1e-05	1e-05	0.116429	0.0278864	1e-05	1e-05	1e-05	1e-05	1e-05	1e-05	1e-05	1e-05	0.131955	1e-05	1e-05	0.119825	1e-05	1e-05	1e-05	1e-05	0.0720489	1e-05	1e-05	1e-05
APPL2	1e-05	1e-05	67.1687	0.0989964	1e-05	0.733739	1e-05	1e-05	1e-05	1e-05	1e-05	1e-05	1e-05	1e-05	1e-05	0.151341	1e-05	1e-05	0.244479	1e-05	1e-05	1e-05	1e-05	1e-05	0.264583	1e-05	1e-05	1e-05	1e-05	1e-05	1e-05	43.1165	1e-05	1e-05	1e-05	1e-05	1e-05	1e-05	1e-05	1e-05	0.0773782	1e-05	1e-05	0.0919835	1e-05	0.955181	0.182533	1e-05	1e-05
APRT	1e-05	1e-05	0.420984	1e-05	1e-05	1e-05	1e-05	1e-05	1e-05	1e-05	1e-05	1e-05	1e-05	1.40057	0.273959	1e-05	1e-05	1e-05	1e-05	1e-05	0.313132	1e-05	1e-05	1e-05	1e-05	1e-05	1e-05	1e-05	1e-05	1e-05	0.738417	0.377832	0.380938	1e-05	1e-05	1e-05	1e-05	1e-05	1e-05	1e-05	1e-05	1e-05	1e-05	1e-05	1e-05	1e-05	1.54637	1e-05	1e-05
AQP1	1e-05	1e-05	1e-05	1e-05	1e-05	0.421943	1e-05	1e-05	1e-05	1e-05	1e-05	1e-05	1e-05	1e-05	1e-05	1e-05	1e-05	1e-05	1e-05	1e-05	1e-05	1e-05	1e-05	1e-05	1e-05	1e-05	1e-05	1e-05	1e-05	1e-05	1e-05	1e-05	1e-05	1e-05	1e-05	1e-05	1e-05	1e-05	1e-05	1e-05	1e-05	1e-05	1e-05	1e-05	1e-05	1e-05	1e-05	1e-05	1e-05
AQP3	1e-05	1e-05	1e-05	1e-05	1e-05	1e-05	1e-05	1e-05	1e-05	1e-05	1e-05	1e-05	1e-05	1e-05	1e-05	1e-05	1e-05	1e-05	1e-05	1e-05	1e-05	1e-05	1e-05	1e-05	1e-05	1e-05	1e-05	1e-05	1e-05	1e-05	1e-05	1e-05	1e-05	1e-05	1e-05	1e-05	1e-05	1e-05	1e-05	1e-05	1e-05	1e-05	1e-05	1e-05	1e-05	1e-05	1e-05	1e-05	1e-05
AQP4	1e-05	1e-05	1e-05	1e-05	1e-05	1e-05	1e-05	1e-05	1e-05	1e-05	1e-05	1e-05	1e-05	1e-05	1e-05	1e-05	1e-05	1e-05	1e-05	1e-05	1e-05	1e-05	1e-05	1e-05	1e-05	1e-05	1e-05	1e-05	1e-05	1e-05	1e-05	1e-05	1e-05	1e-05	1e-05	1e-05	1e-05	1e-05	1e-05	1e-05	1e-05	1e-05	1e-05	1e-05	1e-05	1e-05	1e-05	1e-05	1e-05
AQP9	1e-05	1e-05	1e-05	1e-05	1e-05	1e-05	1e-05	1e-05	1e-05	1e-05	1e-05	1e-05	1e-05	1e-05	1e-05	1e-05	1e-05	1e-05	1e-05	1e-05	1e-05	1e-05	1e-05	0.271561	1e-05	1e-05	1e-05	1e-05	1e-05	1e-05	1e-05	1e-05	1e-05	1e-05	1e-05	1e-05	1e-05	1e-05	1e-05	1e-05	1e-05	1e-05	1e-05	1e-05	1e-05	1e-05	1e-05	1e-05	1e-05
AQR	2.2596	2.54952	2.76675	2.65573	2.58907	0.0242868	2.68614	2.46211	0.622786	2.56695	2.91754	0.765891	2.71377	2.55032	2.77399	2.61719	2.88042	0.308388	2.58955	0.788198	0.153207	0.687237	0.917618	2.27011	2.75609	2.42879	2.58847	2.65759	2.741	2.70796	2.73757	0.7626	2.52944	2.42704	2.97561	0.124105	0.286264	2.71306	0.607188	2.7388	2.39571	2.62712	0.589058	2.36968	2.38399	0.791324	0.735011	2.62817	0.519293
ARAF	0.328654	2.54952	0.355523	0.342138	0.246741	2.66382	0.652732	2.46211	2.63341	2.56695	2.91754	0.185501	0.470954	2.55032	2.77399	2.61719	0.304056	2.79442	2.58955	0.304427	2.81914	0.18737	0.213566	2.27011	2.75609	2.42879	0.245663	2.65759	2.741	0.183097	0.366025	2.865	2.52944	2.42704	0.375669	2.51193	0.417004	0.362265	2.51576	2.7388	2.39571	2.62712	2.8486	2.36968	2.38399	2.91661	2.77519	2.62817	0.191414
ARAP1	0.129991	0.0728556	2.76675	2.65573	0.0413309	2.66382	2.68614	2.46211	0.11828	2.56695	0.201224	0.126041	0.184537	2.55032	2.77399	2.61719	2.88042	2.79442	2.58955	3.35844	2.81914	2.55642	2.84351	0.119797	2.75609	2.42879	2.58847	2.65759	0.109613	0.122162	2.73757	2.865	2.52944	2.42704	0.141641	0.193666	3.02486	2.71306	2.51576	2.7388	2.39571	2.62712	2.8486	2.36968	0.0109906	0.090635	0.050007	2.62817	2.94865
ARAP3	1e-05	1e-05	0.111563	1e-05	1e-05	1e-05	1e-05	1e-05	1e-05	1e-05	1e-05	1e-05	1e-05	1e-05	1e-05	1e-05	1e-05	1e-05	1e-05	1e-05	1e-05	1e-05	1e-05	1e-05	1e-05	1e-05	0.111027	1e-05	0.0769925	1e-05	1e-05	1e-05	1e-05	1e-05	1e-05	1e-05	1e-05	1e-05	1e-05	1e-05	1e-05	1e-05	1e-05	1e-05	1e-05	1e-05	1e-05	1e-05	1e-05
ARCN1	3.18796	3.05495	1.15791	1.73439	4.2793	3.86122	4.32157	3.40555	4.30484	1.6085	3.70779	2.75005	5.15774	3.32095	4.16312	2.93689	9.10032	2.76966	2.74116	1.84689	3.58528	3.27273	3.16862	3.4812	2.57869	4.57825	2.0217	5.04454	2.14816	13.2486	3.80931	7.96614	2.15677	3.73292	7.03162	3.26296	1.97952	5.28703	2.43114	1.63798	5.79225	3.36826	3.58235	4.8258	2.78275	2.75174	3.40679	2.93975	1.8861
ARF1	4.35533	5.21611	6.97076	7.01531	4.29956	5.95316	5.59736	0.311855	4.59714	4.68619	4.76491	2.65256	5.93508	6.91467	2.84342	5.61093	7.57221	5.89883	5.5666	0.805387	7.14939	1.03986	3.72101	3.55496	4.55026	0.161434	0.504253	6.17081	5.63696	6.38524	5.67273	3.42114	3.99242	4.84214	5.76647	4.23146	6.35799	4.06847	3.21533	6.57196	6.97051	7.74751	3.11725	4.21633	5.17714	4.35226	3.9954	4.84576	5.30817
ARF3	4.35533	5.21611	6.97076	7.01531	4.29956	5.95316	5.59736	0.311855	4.59714	4.68619	4.76491	2.65256	5.93508	6.91467	2.84342	5.61093	7.57221	5.89883	5.5666	0.805387	7.14939	1.03986	3.72101	3.55496	4.55026	0.161434	0.504253	6.17081	5.63696	6.38524	5.67273	3.42114	3.99242	4.84214	5.76647	4.23146	6.35799	4.06847	3.21533	6.57196	6.97051	7.74751	3.11725	4.21633	5.17714	4.35226	3.9954	4.84576	5.30817
ARF4	0.648445	0.817207	0.826151	0.751239	0.987878	1.30608	0.55507	1.11587	0.890408	0.873449	0.875992	0.777995	1.27963	0.591045	1.65939	1.64392	1.35202	1.14216	0.87586	1.4855	1.16175	3.11216	0.785143	0.7559	1.35619	0.0676364	0.513243	0.633766	0.20864	0.904493	0.118635	0.957851	1.0369	0.62798	0.280111	0.944332	1.05373	0.931525	0.68394	0.676558	0.758905	0.762406	1.05615	3.26208	0.725957	0.593472	1.13128	0.759369	4.70953
ARF5	1e-05	1e-05	1e-05	1e-05	1e-05	1e-05	1e-05	0.287866	1e-05	0.01195	1e-05	1e-05	1e-05	0.0997124	1e-05	1e-05	0.377257	1e-05	0.180041	1e-05	1e-05	4.07204	0.470146	1e-05	1e-05	0.0676364	1e-05	1e-05	0.20864	1e-05	1e-05	1e-05	1e-05	1e-05	1e-05	1e-05	1e-05	1e-05	1e-05	1e-05	1e-05	2.49939	1e-05	3.26208	1e-05	1e-05	1e-05	1e-05	3.67513
ARF6	1e-05	1e-05	1e-05	1e-05	1e-05	0.613968	1e-05	1e-05	1.34945	1e-05	1e-05	1e-05	1e-05	0.429555	1e-05	1e-05	1e-05	1e-05	1e-05	1e-05	1e-05	1e-05	1e-05	1e-05	1e-05	1e-05	1e-05	1e-05	1e-05	1e-05	0.917394	1e-05	1e-05	1e-05	1e-05	1e-05	1e-05	1e-05	1e-05	1e-05	1e-05	1e-05	1e-05	1e-05	1e-05	1e-05	1e-05	1e-05	1e-05
ARFGAP1	1e-05	1.62287	1e-05	1e-05	1e-05	1e-05	1e-05	1e-05	1e-05	1e-05	1e-05	1e-05	1e-05	1e-05	1e-05	1e-05	1e-05	1e-05	1e-05	1e-05	0.678524	1e-05	1e-05	1e-05	1e-05	1e-05	1e-05	1e-05	1e-05	1e-05	1e-05	1e-05	1e-05	1e-05	1e-05	1e-05	1e-05	1e-05	1e-05	1e-05	1e-05	1e-05	1e-05	1e-05	1e-05	1e-05	1e-05	1e-05	1e-05
ARFGAP2	2.2596	2.54952	0.0262327	0.0464908	2.58907	2.66382	2.68614	1.04673	2.63341	2.56695	2.91754	1.04907	2.71377	2.55032	1.49872	1.17446	2.88042	0.65316	2.58955	3.35844	2.81914	2.55642	2.84351	0.422687	0.649612	2.42879	2.58847	1.089	2.741	0.506694	2.73757	2.865	2.52944	0.059297	2.97561	2.51193	0.52951	0.164836	2.51576	0.918699	0.722575	2.62712	2.8486	0.137137	1.35491	0.044271	0.590751	2.62817	2.94865
ARFGAP3	1e-05	1e-05	1e-05	0.361642	1e-05	0.24058	1e-05	1e-05	0.193918	1e-05	1e-05	1e-05	1e-05	1e-05	1e-05	0.347407	0.581348	1e-05	1e-05	1e-05	0.191659	1e-05	1e-05	1e-05	1e-05	1e-05	1e-05	1e-05	0.219302	1e-05	1e-05	1e-05	1e-05	0.289561	1e-05	1e-05	0.313734	1e-05	0.403022	1e-05	1e-05	1e-05	0.167528	1e-05	1e-05	1e-05	1e-05	0.289966	0.397053
ARFGEF1	0.0769246	0.293134	0.0914165	0.611279	0.533686	0.023833	0.110224	0.0248309	0.0604938	0.312318	0.0284666	0.0662338	0.348607	0.0827504	0.0444458	0.0932634	0.0737214	0.126264	0.243406	0.988212	0.0171102	0.0471625	0.0452507	0.0537044	0.0776118	0.0141314	0.325423	0.799029	0.204769	0.0635606	0.0831838	0.0589138	0.128706	0.063412	1.07726	0.0698451	0.429464	0.0549394	0.15537	0.150935	0.0693604	0.32138	0.0256176	0.107605	0.108062	0.039269	0.100486	0.405177	0.00825403
ARFGEF2	0.0190388	0.0237466	0.1111	0.0624047	0.0534798	0.022769	0.0952875	0.0237224	0.0577932	0.0305256	0.0797306	0.0632769	0.081503	0.0919801	0.0465378	0.0493907	0.0704302	0.0832225	0.175677	0.0585702	0.379574	0.0450571	0.035211	0.0924567	0.135981	0.0135006	0.0884398	0.0165289	0.044676	0.0501126	0.0559768	0.0562837	0.0623043	0.06863	0.0519126	0.0436765	0.0503647	0.0524867	0.0459497	0.043208	0.0662639	0.0116413	0.024474	0.0726688	0.0509607	0.0683029	0.0116031	0.0585401	0.00788555
ARFGEF3	0.679354	1e-05	1e-05	1e-05	0.345614	1e-05	1e-05	1e-05	0.355018	1e-05	1e-05	0.25133	1e-05	1e-05	1e-05	0.500362	1e-05	1e-05	1e-05	1e-05	1e-05	0.339003	1e-05	1e-05	1e-05	1e-05	1e-05	1e-05	1e-05	1e-05	1e-05	1e-05	1e-05	0.373314	1e-05	1e-05	1e-05	1e-05	1e-05	1.13962	1e-05	1e-05	1e-05	1e-05	1e-05	1e-05	1e-05	1e-05	1e-05
ARFIP1	1e-05	1e-05	1e-05	1e-05	1e-05	1e-05	0.920026	1e-05	1e-05	1e-05	0.839132	1e-05	1e-05	1e-05	1e-05	1.57176	1e-05	1e-05	1e-05	1.09508	1e-05	1e-05	0.794553	1e-05	0.0835386	1e-05	1e-05	0.998679	1e-05	0.836752	1e-05	1e-05	1e-05	1e-05	1e-05	1e-05	0.938302	1e-05	0.0538214	1e-05	1e-05	1e-05	1e-05	1e-05	1e-05	1e-05	1e-05	1e-05	1e-05
ARFRP1	1e-05	1e-05	1e-05	1e-05	1e-05	1e-05	1e-05	1e-05	1e-05	1e-05	1e-05	1e-05	1e-05	1e-05	1e-05	1e-05	1e-05	1e-05	1e-05	1e-05	1e-05	1e-05	1e-05	1e-05	1e-05	1e-05	1e-05	1e-05	1e-05	1e-05	1e-05	1e-05	1e-05	1e-05	1e-05	1e-05	1e-05	1e-05	1e-05	1e-05	1e-05	1e-05	1e-05	1e-05	1e-05	1e-05	1e-05	1e-05	1e-05
ARG1	3.45776	1e-05	1e-05	1e-05	1e-05	1e-05	1e-05	5.46164	1e-05	4.44972	0.723385	1e-05	1e-05	1e-05	1e-05	1e-05	0.10352	1e-05	1e-05	1e-05	1e-05	1e-05	1e-05	1e-05	1e-05	1e-05	1.13048	1e-05	1e-05	1e-05	1e-05	0.834736	1e-05	1e-05	5.08992	1e-05	1e-05	9.45542	5.79931	1e-05	1e-05	1e-05	1.72691	1e-05	1e-05	10.8465	0.585315	1e-05	9.26179
ARG2	1e-05	1e-05	1e-05	1e-05	1e-05	1e-05	1e-05	1e-05	1e-05	1e-05	1e-05	1e-05	1e-05	1e-05	1e-05	1e-05	1e-05	1e-05	1e-05	1e-05	1e-05	1e-05	1e-05	1e-05	1e-05	1e-05	1e-05	1e-05	1e-05	1e-05	1e-05	1e-05	1e-05	1e-05	1e-05	1e-05	1e-05	1e-05	1e-05	1e-05	1e-05	1e-05	1e-05	1e-05	1e-05	1e-05	1e-05	1e-05	1e-05
ARHGAP1	2.13572	0.471077	2.76675	2.65573	2.58907	2.66382	2.68614	2.46211	3.5219	0.256592	0.622032	2.77789	2.71377	2.55032	1.01273	0.78945	0.281601	2.79442	2.58955	3.35844	2.81914	2.55642	2.84351	2.27011	2.75609	0.973595	0.584807	0.696178	0.726646	1.32055	0.115666	2.865	0.160314	2.42704	2.97561	0.354799	3.02486	2.71306	2.51576	0.455782	2.39571	2.62712	2.8486	2.36968	2.38399	0.129767	2.77519	2.62817	2.94865
ARHGAP10	1e-05	1e-05	1e-05	1e-05	1e-05	1e-05	1e-05	1e-05	1e-05	1e-05	1e-05	1e-05	1e-05	1e-05	1e-05	1e-05	1e-05	1e-05	1e-05	1e-05	1e-05	1e-05	1e-05	1e-05	1e-05	1e-05	1e-05	1e-05	1e-05	1e-05	1e-05	1e-05	1e-05	1e-05	1e-05	1e-05	1e-05	1e-05	1e-05	1e-05	1e-05	1e-05	1e-05	1e-05	1e-05	1e-05	1e-05	1e-05	1e-05
ARHGAP12	1e-05	1e-05	0.529867	1e-05	1e-05	1e-05	1e-05	0.394133	1e-05	1e-05	1e-05	1e-05	1e-05	1e-05	1e-05	1e-05	1e-05	1e-05	1e-05	1e-05	1e-05	1e-05	1e-05	1e-05	1e-05	1e-05	1e-05	1e-05	1e-05	1e-05	1e-05	1e-05	1e-05	1e-05	1e-05	1e-05	0.6002	1e-05	1e-05	0.823311	1e-05	1e-05	1e-05	1e-05	1e-05	1e-05	1e-05	1e-05	1e-05
ARHGAP17	0.214086	0.68014	0.226034	1e-05	1e-05	1e-05	0.510932	0.32293	1e-05	1e-05	1e-05	1e-05	1e-05	1e-05	1e-05	1e-05	1e-05	1e-05	1e-05	1e-05	1e-05	0.226037	1e-05	1e-05	1e-05	1e-05	1e-05	1e-05	1e-05	1e-05	1e-05	1e-05	1e-05	0.569627	1e-05	1e-05	1e-05	1e-05	1e-05	1e-05	0.350911	1e-05	1e-05	1e-05	1e-05	1e-05	1e-05	1e-05	1e-05
ARHGAP18	1e-05	1e-05	1e-05	1e-05	1e-05	1e-05	1e-05	1e-05	1e-05	1e-05	1e-05	1e-05	1e-05	1e-05	1e-05	1e-05	1e-05	1e-05	1e-05	1e-05	1e-05	1e-05	1e-05	1e-05	1e-05	1e-05	1e-05	1e-05	1e-05	1e-05	1e-05	1e-05	1e-05	1e-05	1e-05	1e-05	1e-05	1e-05	1e-05	1e-05	1e-05	1e-05	1e-05	1e-05	1e-05	1e-05	1e-05	1e-05	1e-05
ARHGAP19	1e-05	1e-05	1e-05	1e-05	1e-05	1e-05	1e-05	1e-05	1e-05	1e-05	1e-05	1e-05	1e-05	1e-05	1e-05	1e-05	1e-05	1e-05	1e-05	1e-05	1e-05	1e-05	1e-05	1e-05	1e-05	1e-05	1e-05	1e-05	1e-05	1e-05	1e-05	1e-05	1e-05	1e-05	1e-05	1e-05	1e-05	1e-05	1e-05	1e-05	1e-05	1e-05	1e-05	1e-05	1e-05	1e-05	1e-05	1e-05	1e-05
ARHGAP21	1e-05	1e-05	1e-05	1e-05	1e-05	1e-05	1e-05	1e-05	1e-05	0.100383	1e-05	1e-05	1e-05	1e-05	1e-05	1e-05	1e-05	1e-05	1e-05	1e-05	1e-05	1e-05	1e-05	1e-05	1e-05	1e-05	1e-05	1e-05	1e-05	1e-05	1e-05	1e-05	1e-05	1e-05	1e-05	1e-05	1e-05	1e-05	1e-05	1e-05	1e-05	1e-05	1e-05	1e-05	1e-05	1e-05	1e-05	1e-05	1e-05
ARHGAP23	1e-05	1e-05	1e-05	1e-05	1e-05	1e-05	1e-05	1e-05	1e-05	1e-05	1e-05	1e-05	1e-05	1e-05	1e-05	1e-05	1e-05	1e-05	1e-05	1e-05	1e-05	1e-05	1e-05	1e-05	1e-05	1e-05	1e-05	1e-05	1e-05	1e-05	1e-05	1e-05	1e-05	1e-05	1e-05	1e-05	1e-05	1e-05	1e-05	1e-05	1e-05	1e-05	1e-05	1e-05	1e-05	1e-05	1e-05	1e-05	1e-05
ARHGAP25	2.2596	0.225124	2.76675	2.65573	2.58907	2.66382	2.68614	2.46211	2.63341	2.56695	2.91754	2.77789	0.306459	0.0778491	2.77399	2.61719	2.88042	2.79442	2.58955	3.35844	2.81914	0.162108	2.84351	0.0710435	0.261124	2.42879	0.818728	2.65759	0.170007	2.70796	0.236517	0.153045	2.52944	2.42704	2.97561	2.51193	0.392988	2.71306	2.51576	2.7388	2.39571	2.62712	0.720876	0.0776821	2.38399	2.91661	0.193082	2.62817	0.216753
ARHGAP26	1e-05	1e-05	1e-05	1e-05	1e-05	1e-05	1e-05	1e-05	1e-05	1e-05	1e-05	1e-05	1e-05	1e-05	1e-05	1e-05	1e-05	1e-05	1e-05	1e-05	1e-05	1e-05	1e-05	1e-05	1e-05	1e-05	1e-05	1e-05	1e-05	1e-05	1e-05	1e-05	1e-05	1e-05	1e-05	1e-05	1e-05	1e-05	1e-05	1e-05	1e-05	1e-05	1e-05	1e-05	1e-05	1e-05	1e-05	1e-05	1e-05
ARHGAP27	1e-05	1e-05	1e-05	1e-05	1e-05	1e-05	1e-05	1e-05	1e-05	1e-05	1e-05	1e-05	1e-05	1e-05	1e-05	1e-05	1e-05	1e-05	1e-05	7.1874	1e-05	1e-05	1e-05	1e-05	1e-05	1e-05	1e-05	1e-05	1e-05	1e-05	1e-05	1e-05	1e-05	1e-05	1e-05	1e-05	1e-05	1e-05	1e-05	1e-05	1e-05	1e-05	1e-05	1e-05	1e-05	1e-05	1e-05	1e-05	1e-05
ARHGAP29	1e-05	1e-05	1e-05	1e-05	1e-05	1e-05	1e-05	1e-05	1e-05	1e-05	1e-05	1e-05	1e-05	1e-05	1e-05	1e-05	1e-05	1e-05	1e-05	1e-05	1e-05	1e-05	1e-05	1e-05	1e-05	1e-05	1e-05	1e-05	1e-05	1e-05	1e-05	1e-05	1e-05	1e-05	1e-05	1e-05	1e-05	1e-05	1e-05	1e-05	1e-05	1e-05	1e-05	1e-05	1e-05	1e-05	1e-05	1e-05	1e-05
ARHGAP30	1e-05	1e-05	1e-05	1e-05	1e-05	1e-05	1e-05	1e-05	1e-05	1e-05	1e-05	1e-05	1e-05	1e-05	1e-05	1e-05	1e-05	1e-05	1e-05	1e-05	1e-05	1e-05	1e-05	1e-05	1e-05	1e-05	1e-05	1e-05	1e-05	1e-05	1e-05	1e-05	1e-05	1e-05	0.240239	1e-05	1e-05	1e-05	1e-05	1e-05	1e-05	1e-05	1e-05	1e-05	1e-05	1e-05	1e-05	1e-05	1e-05
ARHGAP31	1e-05	1e-05	1e-05	1e-05	1e-05	1e-05	1e-05	1e-05	1e-05	1e-05	1e-05	1e-05	1e-05	1e-05	1e-05	1e-05	1e-05	1e-05	1e-05	1e-05	1e-05	1e-05	1e-05	1e-05	1e-05	1e-05	1e-05	1e-05	1e-05	1e-05	1e-05	1e-05	1e-05	1e-05	1e-05	1e-05	1e-05	1e-05	1e-05	1e-05	1e-05	1e-05	1e-05	1e-05	1e-05	1e-05	1e-05	1e-05	1e-05
ARHGAP35	0.0129961	1e-05	1e-05	1e-05	1e-05	1e-05	0.0723185	1e-05	1e-05	1e-05	1e-05	1e-05	1e-05	1e-05	1e-05	1e-05	1e-05	0.00769996	1e-05	1e-05	1e-05	0.0124889	1e-05	1e-05	1e-05	1e-05	1e-05	1e-05	1e-05	0.0297492	1e-05	1e-05	1e-05	1e-05	1e-05	1e-05	0.0236321	1e-05	1e-05	0.0450591	0.0851964	1e-05	1e-05	1e-05	1e-05	1e-05	1e-05	0.0592463	1e-05
ARHGAP36	1e-05	1e-05	1e-05	1e-05	1e-05	1e-05	1e-05	1e-05	1e-05	1e-05	1e-05	1e-05	1e-05	1e-05	1e-05	1e-05	1e-05	1e-05	1e-05	1e-05	1e-05	1e-05	1e-05	1e-05	1e-05	1e-05	1e-05	1e-05	1e-05	1e-05	1e-05	1e-05	1e-05	1e-05	1e-05	1e-05	1e-05	1e-05	1e-05	1e-05	1e-05	1e-05	1e-05	1e-05	1e-05	1e-05	1e-05	1e-05	1e-05
ARHGAP39	1e-05	1e-05	1e-05	1e-05	1e-05	1e-05	1e-05	1e-05	1e-05	1e-05	1e-05	1e-05	1e-05	1e-05	1e-05	1e-05	1e-05	1e-05	1e-05	1e-05	1e-05	1e-05	1e-05	1e-05	1e-05	1e-05	1e-05	1e-05	1e-05	1e-05	1e-05	1e-05	1e-05	1e-05	1e-05	1e-05	1e-05	1e-05	1e-05	1e-05	1e-05	1e-05	1e-05	1e-05	1e-05	1e-05	1e-05	1e-05	1e-05
ARHGAP4	1e-05	0.0588831	1e-05	1e-05	1e-05	1e-05	1e-05	1e-05	1e-05	1e-05	3.26967	1e-05	1e-05	0.0946129	3.29177	1e-05	1e-05	1e-05	1e-05	1e-05	1e-05	1e-05	1e-05	1e-05	1e-05	1e-05	1e-05	1e-05	1e-05	1e-05	1e-05	1.76627	1e-05	1e-05	1e-05	1e-05	1e-05	2.14858	1e-05	1.92355	1e-05	0.0492223	1e-05	1e-05	1e-05	1e-05	1e-05	0.459778	1e-05
ARHGAP44	1e-05	1e-05	1e-05	1e-05	1e-05	1e-05	0.16375	1e-05	0.28467	1e-05	0.433203	1e-05	1e-05	1e-05	1e-05	1e-05	1e-05	1e-05	1e-05	1e-05	0.149657	1e-05	1e-05	1e-05	1e-05	1e-05	1e-05	1e-05	1e-05	1e-05	1e-05	1e-05	1e-05	1e-05	1e-05	1e-05	1e-05	1e-05	1e-05	1e-05	1e-05	1e-05	1e-05	1e-05	1e-05	1e-05	1e-05	1e-05	0.178826
ARHGAP45	1e-05	1e-05	1e-05	0.0371589	1e-05	1e-05	1e-05	1e-05	1e-05	1e-05	1e-05	1e-05	1e-05	1e-05	1e-05	1e-05	1e-05	1e-05	1e-05	1e-05	1e-05	1e-05	1e-05	1e-05	1e-05	1e-05	1e-05	1e-05	1e-05	1e-05	1e-05	1e-05	1e-05	1e-05	1e-05	1e-05	1e-05	1e-05	1e-05	1e-05	1e-05	0.788027	1e-05	1e-05	1e-05	1e-05	1e-05	1e-05	1e-05
ARHGAP5	1e-05	1e-05	1e-05	1e-05	1e-05	1e-05	1e-05	1e-05	1e-05	1e-05	1e-05	0.0546866	1e-05	1e-05	1e-05	1e-05	1e-05	1e-05	1e-05	1e-05	1e-05	1e-05	1e-05	1e-05	1e-05	1e-05	1e-05	1e-05	1e-05	1e-05	1e-05	1e-05	1e-05	1e-05	1e-05	1e-05	1e-05	1e-05	1e-05	1e-05	1e-05	1e-05	1e-05	1e-05	1e-05	1e-05	1e-05	1e-05	1e-05
ARHGAP6	0.304066	1e-05	1e-05	1e-05	1e-05	1e-05	1e-05	1e-05	1e-05	1e-05	1e-05	1e-05	1e-05	1e-05	1e-05	1e-05	1e-05	0.344736	1e-05	1e-05	1e-05	1e-05	1e-05	1e-05	1e-05	1e-05	1e-05	1e-05	1e-05	1e-05	1e-05	1e-05	1e-05	1e-05	1e-05	1e-05	1e-05	1e-05	1e-05	1e-05	1e-05	1e-05	1e-05	1e-05	1e-05	1e-05	1e-05	1e-05	1e-05
ARHGAP8	1e-05	1e-05	1e-05	1e-05	1e-05	1e-05	1e-05	1e-05	0.369288	1e-05	1e-05	1e-05	1e-05	1e-05	1e-05	1e-05	1e-05	1e-05	1e-05	1e-05	1e-05	1e-05	1e-05	1e-05	1e-05	1e-05	1e-05	1e-05	1e-05	1e-05	1e-05	1e-05	1e-05	1e-05	1e-05	1e-05	1e-05	1e-05	1e-05	1e-05	1e-05	1e-05	1e-05	1e-05	1e-05	1e-05	1e-05	1e-05	1e-05
ARHGDIA	1.9727	1.51339	0.222669	0.281749	0.397836	0.187854	0.604468	3.04088	0.443811	0.1676	0.791919	0.463965	0.42359	0.684859	0.631488	3.74852	0.500852	0.808118	0.811358	0.181041	0.756052	1.5034	0.0403724	0.452606	1.03245	0.982073	5.19057	0.630449	58.5423	0.785805	0.293672	0.638508	0.507218	0.739525	0.400167	3.249	1.30209	0.791048	0.761025	0.146173	0.599124	1.0717	1.65484	0.381264	38.9463	0.821361	0.948351	1.93293	0.597296
ARHGDIB	3.75287	3.76042	3.10476	4.37872	1.54382	0.17247	2.91027	2.7356	2.00029	4.45811	0.249509	1.50364	2.34882	1.53024	2.64841	0.115381	0.159315	2.22542	2.28336	2.34706	1.099	2.37496	5.49132	1.7301	2.57977	2.98238	3.26824	2.11922	3.21216	20.2579	2.48367	0.415173	2.45897	1.87773	2.33106	1.70905	2.30947	1.69421	1.67734	3.26597	6.7302	2.55804	2.97613	2.5997	2.5224	3.26958	3.19194	12.3654	16.8482
ARHGEF1	0.760138	0.253749	0.302893	0.188995	0.308173	0.162323	0.276605	0.298757	0.305476	0.287648	0.273161	0.370174	0.310481	0.34904	0.325038	0.243252	0.252529	0.272459	0.371519	1.27156	0.280335	0.194137	0.267001	0.672398	0.265542	0.199469	0.259708	0.423856	0.247393	0.369024	0.212154	0.508103	0.106983	0.307134	0.196492	0.471428	0.627166	0.354969	0.198828	1.12708	0.314695	0.0201666	0.179826	0.125546	0.519483	0.277418	0.469632	0.974863	0.304224
ARHGEF10	1e-05	1e-05	1e-05	1e-05	1e-05	1e-05	0.0818448	1e-05	1e-05	1e-05	1e-05	1e-05	1e-05	0.0753675	1e-05	0.0811371	1e-05	0.0837156	1e-05	1e-05	1e-05	1e-05	0.262418	1e-05	1e-05	1e-05	0.0610799	1e-05	1e-05	0.0828886	0.651894	1e-05	0.0902861	1e-05	1e-05	1e-05	1e-05	1e-05	1e-05	0.249858	1e-05	0.127396	1e-05	0.0804646	1e-05	1e-05	1e-05	1e-05	1e-05
ARHGEF10L	1e-05	1e-05	1e-05	1e-05	1e-05	1e-05	0.0831039	1e-05	1e-05	1e-05	1e-05	1e-05	1e-05	0.076527	1e-05	0.0823854	1e-05	0.0850036	1e-05	1e-05	1e-05	1e-05	0.153408	1e-05	1e-05	1e-05	0.0620196	1e-05	1e-05	0.0841638	0.0751839	1e-05	0.0916751	1e-05	1e-05	1e-05	1e-05	1e-05	1e-05	0.253702	1e-05	0.129356	1e-05	0.0817025	1e-05	1e-05	1e-05	1e-05	1e-05
ARHGEF11	1e-05	1e-05	1e-05	1e-05	1e-05	0.0194903	1e-05	1e-05	1e-05	1e-05	1e-05	1e-05	1e-05	1e-05	0.15109	1e-05	1e-05	1e-05	0.0131325	1e-05	1e-05	1e-05	1e-05	0.109496	1e-05	1e-05	1e-05	0.021568	1e-05	1e-05	1e-05	1e-05	1e-05	1e-05	1e-05	1e-05	1e-05	1e-05	1e-05	1e-05	1e-05	1e-05	1e-05	1e-05	1e-05	1e-05	1e-05	1e-05	1e-05
ARHGEF12	1e-05	1e-05	1e-05	1e-05	1e-05	1e-05	1e-05	1e-05	1e-05	1e-05	1e-05	1e-05	1e-05	1e-05	1e-05	1e-05	0.681485	0.413768	1e-05	1e-05	1.41978	1e-05	1e-05	1e-05	1e-05	1e-05	1e-05	1e-05	1e-05	1e-05	1e-05	0.485904	1e-05	1e-05	1e-05	1e-05	1e-05	1e-05	0.547824	1e-05	1e-05	1e-05	1e-05	1e-05	1e-05	1e-05	1e-05	1e-05	1e-05
ARHGEF16	1e-05	1e-05	1e-05	1e-05	1e-05	1e-05	1e-05	1e-05	1e-05	1e-05	1e-05	1e-05	1e-05	1e-05	1e-05	1e-05	1e-05	1e-05	1e-05	1e-05	1e-05	1e-05	1e-05	1e-05	1e-05	1e-05	1e-05	1e-05	1e-05	1e-05	1e-05	1e-05	1e-05	1e-05	1e-05	1e-05	1e-05	1e-05	1e-05	1e-05	1e-05	1e-05	1e-05	1e-05	1e-05	1e-05	1e-05	1e-05	1e-05
ARHGEF17	1e-05	1e-05	1e-05	1e-05	1e-05	1e-05	1e-05	1e-05	1e-05	1e-05	1e-05	1e-05	1e-05	0.199587	1e-05	1e-05	1e-05	1e-05	1e-05	1e-05	0.100011	1e-05	1e-05	1e-05	1e-05	1e-05	1e-05	1e-05	1e-05	1e-05	1e-05	1e-05	1e-05	1e-05	1e-05	1e-05	0.187165	1e-05	1e-05	1e-05	1e-05	1e-05	1e-05	1e-05	1e-05	1e-05	1e-05	1e-05	1e-05
ARHGEF18	1e-05	1e-05	1e-05	1e-05	1e-05	1e-05	1e-05	1e-05	1e-05	1e-05	1e-05	0.235451	1e-05	1e-05	1e-05	1e-05	1e-05	1e-05	1e-05	0.413495	1e-05	1e-05	1e-05	1e-05	1e-05	1e-05	1e-05	1e-05	1e-05	1e-05	1e-05	1e-05	1e-05	1e-05	1e-05	1e-05	1e-05	1e-05	1e-05	1e-05	1e-05	1e-05	1e-05	1e-05	1e-05	1e-05	1e-05	1e-05	1e-05
ARHGEF2	2.2596	8.02585	2.76675	2.65573	2.58907	2.66382	9.20824	8.35265	2.63341	2.56695	9.01592	2.77789	2.71377	2.55032	16.9	2.61719	2.88042	2.79442	2.58955	11.9415	2.81914	2.55642	2.84351	2.27011	0.142057	11.4538	2.58847	13.4079	2.741	15.4076	1.1442	2.865	12.1295	0.0476723	0.250575	9.50206	11.9133	16.1801	2.51576	2.7388	11.7015	2.62712	0.031943	2.36968	12.6062	14.3135	2.77519	11.8703	2.94865
ARHGEF28	1e-05	1e-05	1e-05	1e-05	1e-05	1e-05	1e-05	1e-05	1e-05	1e-05	1e-05	1e-05	1e-05	1e-05	1e-05	1e-05	1e-05	1e-05	1e-05	1e-05	1e-05	1e-05	1e-05	1e-05	1e-05	1e-05	1e-05	1e-05	1e-05	1e-05	1e-05	1e-05	1e-05	1e-05	1e-05	1e-05	1e-05	1e-05	1e-05	1e-05	1e-05	1e-05	1e-05	1e-05	1e-05	1e-05	1e-05	1e-05	1e-05
ARHGEF37	1e-05	1.86729	1e-05	1e-05	1e-05	1e-05	1e-05	1e-05	1e-05	1e-05	1e-05	1.24434	1e-05	1e-05	1e-05	1e-05	1e-05	1e-05	1e-05	1.08162	1e-05	1e-05	1e-05	1e-05	1e-05	1e-05	1e-05	2.21169	1e-05	2.32083	1.87521	1e-05	1e-05	1e-05	1.53884	1e-05	1e-05	1e-05	1e-05	1e-05	1e-05	0.273741	1e-05	1e-05	1e-05	1e-05	2.13316	1.80294	3.15881
ARHGEF4	1e-05	1e-05	1e-05	1e-05	1e-05	1e-05	1e-05	1e-05	1e-05	1e-05	1e-05	1e-05	1e-05	1e-05	1e-05	1e-05	1e-05	1e-05	1e-05	1e-05	1e-05	1e-05	1e-05	1e-05	1e-05	1e-05	1e-05	1e-05	1e-05	1e-05	1e-05	1e-05	0.0427714	1e-05	1e-05	1e-05	1e-05	1e-05	1e-05	1e-05	1e-05	1e-05	1e-05	1e-05	1e-05	1e-05	1e-05	1e-05	1e-05
ARHGEF40	0.618352	1.96161	0.995332	3.01712	1.35074	1.89388	0.982336	0.951071	2.32726	1.39771	0.610943	1.25391	1.1592	1.22294	0.758543	1.50392	0.585964	1.58771	2.09743	1.23508	1.09107	1.46504	1.41261	0.80767	1.5741	1.08178	1.53701	1.12282	0.455699	1.14282	1.52993	1.20855	0.0169521	1.13397	1.31357	0.906757	0.965556	0.985757	0.895975	1.05209	0.606875	0.466584	1.76238	1.43096	0.63837	2.55874	1.37401	0.602014	1.36758
ARHGEF5	1e-05	1e-05	1e-05	1e-05	1e-05	1e-05	1e-05	1e-05	1e-05	1e-05	1e-05	1e-05	1e-05	1e-05	1e-05	1e-05	1e-05	1e-05	1e-05	1e-05	1e-05	1e-05	1e-05	1e-05	1e-05	1e-05	1e-05	1e-05	1e-05	1e-05	1e-05	1e-05	1e-05	1e-05	1e-05	1e-05	1e-05	1e-05	1e-05	1e-05	1e-05	1e-05	1e-05	1e-05	1e-05	1e-05	1e-05	1e-05	1e-05
ARHGEF6	2.2277	4.54386	4.09149	3.2946	2.40559	4.67704	2.00116	4.11767	6.75999	3.37317	5.56594	2.95683	3.25977	3.53839	5.2918	3.86738	2.65187	3.16011	0.174983	7.33352	3.16739	1.28756	7.29245	0.283655	4.30498	4.8138	2.67499	4.72731	3.09177	3.96289	5.38386	3.17688	2.92823	2.89874	6.76433	1.83314	3.14794	3.21721	3.19257	3.40051	3.04416	3.70191	6.56701	4.92958	0.791573	3.93356	4.87184	0.0669257	5.43071
ARHGEF7	1e-05	1e-05	1e-05	1e-05	1e-05	1e-05	1e-05	1e-05	1e-05	0.126607	1e-05	1e-05	1e-05	1e-05	1e-05	0.0802201	1e-05	0.094932	1e-05	1e-05	1e-05	1e-05	0.47707	0.139448	1e-05	0.171448	1e-05	1e-05	1e-05	1e-05	1e-05	0.456006	1e-05	0.0312245	1e-05	0.0487742	1e-05	1e-05	1e-05	1e-05	1e-05	1e-05	1e-05	1e-05	1e-05	1e-05	1e-05	1e-05	1e-05
ARID1A	1e-05	1e-05	1e-05	1e-05	1e-05	1e-05	1e-05	1e-05	1e-05	1e-05	1e-05	1e-05	1e-05	1e-05	1e-05	1e-05	1e-05	1e-05	1e-05	0.277149	1e-05	1e-05	1e-05	1e-05	1e-05	1e-05	1e-05	29.6986	1e-05	1e-05	1e-05	1e-05	1e-05	1e-05	1e-05	1e-05	1e-05	1e-05	1e-05	1e-05	1e-05	1e-05	1e-05	34.7626	1e-05	1e-05	1e-05	1e-05	1e-05
ARID1B	1e-05	1e-05	1e-05	1e-05	1e-05	1e-05	1e-05	1e-05	1e-05	1e-05	1e-05	1e-05	1e-05	1e-05	1e-05	1e-05	1e-05	1e-05	1e-05	1e-05	1e-05	1e-05	1e-05	1e-05	1e-05	1e-05	1e-05	1e-05	1e-05	1e-05	1e-05	1e-05	1e-05	1e-05	1e-05	1e-05	1e-05	1e-05	1e-05	1e-05	1e-05	1e-05	1e-05	1e-05	1e-05	1e-05	1e-05	1e-05	1e-05
ARID3A	1e-05	1e-05	1e-05	1e-05	1e-05	1e-05	1e-05	1e-05	1e-05	1e-05	1e-05	1e-05	1e-05	1e-05	1e-05	1e-05	1e-05	1e-05	1e-05	1e-05	0.891322	1e-05	1e-05	1e-05	0.182503	1e-05	1e-05	1e-05	1e-05	1e-05	1e-05	1e-05	1e-05	1e-05	1e-05	1e-05	1e-05	1e-05	1e-05	1e-05	1e-05	1e-05	1e-05	1e-05	1e-05	1e-05	1e-05	1e-05	1e-05
ARID3B	1e-05	1e-05	1e-05	1e-05	1e-05	1e-05	1e-05	1e-05	1e-05	1e-05	1e-05	1e-05	1e-05	1e-05	1e-05	1e-05	1e-05	1e-05	1e-05	1e-05	1e-05	1e-05	1e-05	1e-05	1e-05	1e-05	1e-05	1e-05	1e-05	1e-05	1e-05	1e-05	1e-05	1e-05	1e-05	1e-05	1e-05	1e-05	1e-05	1e-05	1e-05	1e-05	1e-05	1e-05	1e-05	1e-05	1e-05	1e-05	1e-05
ARID3C	1e-05	1e-05	1e-05	1e-05	1e-05	1e-05	1e-05	1e-05	1e-05	1e-05	1e-05	1e-05	1e-05	1e-05	1e-05	1e-05	1e-05	1e-05	1e-05	1e-05	1e-05	1e-05	1e-05	1e-05	1e-05	1e-05	1e-05	1e-05	1e-05	1e-05	1e-05	1e-05	1e-05	1e-05	1e-05	1e-05	1e-05	1e-05	1e-05	1e-05	1e-05	1e-05	1e-05	1e-05	1e-05	1e-05	1e-05	1e-05	1e-05
ARIH1	1e-05	1e-05	1e-05	1e-05	0.106057	1e-05	1e-05	1e-05	1e-05	1e-05	1e-05	1e-05	1e-05	1e-05	0.604612	1e-05	1e-05	0.179957	1e-05	1e-05	0.373993	0.216121	0.498142	1e-05	1e-05	0.141778	1e-05	1e-05	1e-05	1e-05	1e-05	1e-05	1e-05	1e-05	1e-05	1e-05	1e-05	1e-05	1e-05	1e-05	1e-05	1e-05	1e-05	1e-05	1e-05	1e-05	1e-05	1e-05	1e-05
ARIH2	1e-05	1e-05	1e-05	1e-05	1e-05	1e-05	1e-05	1e-05	1e-05	1e-05	1e-05	1e-05	1e-05	1e-05	1e-05	1e-05	1e-05	0.322719	1e-05	1e-05	1e-05	1e-05	1e-05	1e-05	1e-05	1e-05	1e-05	1e-05	1e-05	1e-05	1e-05	1e-05	1e-05	1e-05	1e-05	1e-05	1e-05	1e-05	1e-05	1e-05	1e-05	1e-05	1e-05	1e-05	1e-05	1e-05	1e-05	1e-05	1e-05
ARL1	1e-05	1e-05	1e-05	1e-05	1e-05	1e-05	1e-05	0.291417	1e-05	1e-05	1e-05	1e-05	1e-05	1e-05	1e-05	1e-05	1e-05	0.40025	1e-05	1e-05	0.682424	1e-05	1e-05	1e-05	1e-05	1e-05	1e-05	1e-05	1e-05	1e-05	1e-05	1e-05	1e-05	1e-05	1e-05	1e-05	1e-05	0.394288	1e-05	1e-05	1e-05	1e-05	1e-05	1e-05	1e-05	1e-05	1e-05	1e-05	1.64355
ARL14EP	1e-05	1e-05	1e-05	1e-05	1e-05	1e-05	1e-05	1e-05	1e-05	1e-05	1e-05	1e-05	1e-05	1e-05	1e-05	1e-05	1e-05	1e-05	1e-05	1e-05	1e-05	1e-05	1e-05	1e-05	1e-05	1e-05	1e-05	1e-05	1e-05	1e-05	1e-05	1e-05	1e-05	1e-05	1e-05	1e-05	1e-05	1e-05	1e-05	1e-05	1e-05	1e-05	1e-05	1e-05	1e-05	1e-05	1e-05	1e-05	1e-05
ARL15	1e-05	1e-05	1e-05	1e-05	1e-05	1e-05	1e-05	1e-05	1e-05	1e-05	1e-05	1e-05	1e-05	1e-05	1e-05	1e-05	1e-05	1e-05	1e-05	1e-05	1e-05	4.472	1e-05	1e-05	1e-05	1e-05	1e-05	1e-05	1e-05	1e-05	1e-05	1e-05	1e-05	1e-05	1e-05	1e-05	1e-05	2.6409	1e-05	1e-05	1e-05	1e-05	1e-05	1e-05	1e-05	1e-05	1e-05	1e-05	5.14742
ARL2	7.41878	6.77176	7.35713	9.72358	7.33581	7.23574	6.90103	4.80789	6.57174	7.27178	8.73271	7.23831	8.45087	8.2986	9.00307	9.25617	6.8344	6.63431	5.25659	8.40213	7.95865	6.96916	7.71422	6.87222	6.88774	7.53021	7.61999	6.86169	5.05581	10.015	6.9948	7.94179	6.43183	7.97732	6.81381	7.62865	8.48533	8.96932	5.75103	7.81972	6.40151	8.06639	5.9563	9.13052	7.18594	9.05917	8.50783	6.87692	8.17725
ARL2BP	1e-05	1e-05	1e-05	1e-05	1e-05	1e-05	1e-05	1e-05	1e-05	1e-05	1e-05	1e-05	1e-05	1e-05	1e-05	1e-05	1e-05	1e-05	1e-05	1e-05	1e-05	1e-05	1e-05	1e-05	1e-05	1e-05	1e-05	1e-05	1e-05	1e-05	1e-05	1e-05	1e-05	1e-05	1e-05	1e-05	1e-05	1e-05	1e-05	1e-05	1e-05	1e-05	1e-05	1e-05	1e-05	1e-05	1e-05	1e-05	1e-05
ARL3	1e-05	1e-05	1e-05	1e-05	1e-05	0.879856	1e-05	1e-05	1e-05	1e-05	1e-05	1.23124	1e-05	1e-05	1e-05	1e-05	1e-05	1e-05	1.16632	1e-05	1e-05	1e-05	1e-05	2.65957	1e-05	0.465623	0.630754	1e-05	0.0460327	1e-05	1e-05	1e-05	1e-05	1e-05	1e-05	1e-05	1e-05	1e-05	1e-05	1e-05	1e-05	1e-05	1e-05	1e-05	1e-05	1e-05	1e-05	1e-05	1e-05
ARL5A	1e-05	1.10651	1e-05	1e-05	1e-05	1e-05	1e-05	1e-05	1e-05	1e-05	1e-05	1e-05	1e-05	1e-05	1e-05	1e-05	1e-05	1e-05	1e-05	1e-05	1e-05	1e-05	1e-05	1e-05	1e-05	1e-05	1e-05	1e-05	1e-05	1e-05	1e-05	1e-05	1e-05	1e-05	1e-05	1e-05	1e-05	1e-05	1e-05	1e-05	1e-05	1e-05	1e-05	1e-05	1e-05	1e-05	1e-05	1e-05	1e-05
ARL5B	1e-05	1e-05	1e-05	1e-05	1e-05	1e-05	1e-05	1e-05	1e-05	2.23777	1e-05	1e-05	1e-05	1e-05	1e-05	1e-05	1e-05	1e-05	1e-05	1e-05	1e-05	1e-05	1e-05	1e-05	1e-05	1e-05	1e-05	1e-05	1e-05	1e-05	1e-05	1e-05	1e-05	1e-05	1e-05	1e-05	1e-05	1e-05	1e-05	1e-05	1e-05	1e-05	1e-05	1e-05	1e-05	1e-05	1e-05	1e-05	1e-05
ARL6	1e-05	1e-05	1e-05	1e-05	1e-05	1e-05	1.51242	0.92669	1e-05	1e-05	1e-05	1e-05	1e-05	1e-05	1e-05	1e-05	1e-05	1e-05	1e-05	1e-05	1e-05	1e-05	1e-05	0.496972	1e-05	1e-05	1e-05	1e-05	1e-05	1e-05	1e-05	1e-05	1e-05	1e-05	1e-05	1e-05	1e-05	1e-05	1e-05	1e-05	1e-05	1e-05	1e-05	0.532068	1e-05	1e-05	0.652545	1e-05	1e-05
ARL6IP4	1e-05	1e-05	1e-05	1e-05	1e-05	1e-05	1e-05	1e-05	1e-05	1e-05	1e-05	1e-05	1e-05	1e-05	1e-05	1e-05	1e-05	1e-05	1e-05	1e-05	1e-05	1e-05	1e-05	1e-05	1e-05	1e-05	1e-05	1e-05	1e-05	1e-05	1e-05	1e-05	1e-05	1e-05	1e-05	1e-05	1e-05	1e-05	1e-05	1e-05	1e-05	1e-05	1e-05	1e-05	1e-05	1e-05	1e-05	1e-05	1e-05
ARL6IP5	1e-05	1e-05	1e-05	1e-05	1e-05	1e-05	1e-05	1e-05	1e-05	1e-05	18.367	3.93855	1e-05	1e-05	1e-05	1e-05	1e-05	1e-05	1e-05	1e-05	1e-05	1e-05	1e-05	12.8484	2.28411	2.56561	1e-05	1e-05	1e-05	1e-05	0.853966	1e-05	22.0884	1e-05	1e-05	1e-05	0.607235	1e-05	1e-05	0.142026	1e-05	2.89804	1e-05	5.58352	3.39041	1e-05	1e-05	1e-05	1e-05
ARL6IP6	1e-05	1e-05	1e-05	1e-05	1e-05	1e-05	1e-05	1e-05	1e-05	1e-05	1e-05	1e-05	1e-05	1e-05	1e-05	1e-05	1e-05	1e-05	1e-05	1e-05	1e-05	1e-05	1e-05	1e-05	1e-05	1e-05	1e-05	1e-05	1e-05	1e-05	1e-05	1e-05	1e-05	1e-05	1e-05	1e-05	1e-05	1e-05	1e-05	1e-05	1e-05	1e-05	1e-05	1e-05	1e-05	1e-05	1e-05	1e-05	1e-05
ARL8A	1e-05	1e-05	1e-05	1e-05	1e-05	0.0340898	1e-05	8.722	1e-05	1e-05	1e-05	1e-05	1e-05	1e-05	1e-05	1e-05	3.64552	1e-05	2.39703	1e-05	5.48218	8.63253	1e-05	1e-05	1e-05	5.27306	1e-05	1e-05	1e-05	1e-05	1e-05	0.0136389	1e-05	1e-05	1e-05	1e-05	1e-05	1e-05	1e-05	1e-05	1e-05	1e-05	1e-05	3.2226	1e-05	1e-05	0.131776	1e-05	1e-05
ARL8B	1e-05	1e-05	1e-05	1e-05	1e-05	1e-05	1e-05	1e-05	1e-05	1e-05	1e-05	1e-05	1e-05	1e-05	1e-05	1e-05	0.294738	1e-05	1e-05	1e-05	1e-05	1e-05	1e-05	1e-05	1e-05	0.267321	1e-05	1e-05	1e-05	1e-05	1e-05	1e-05	1e-05	1e-05	1e-05	1e-05	1e-05	0.0884805	1e-05	1e-05	1e-05	1e-05	1e-05	1e-05	1e-05	1e-05	1e-05	1e-05	1e-05
ARMC1	1e-05	1e-05	1e-05	1e-05	0.171682	1e-05	1e-05	1e-05	1e-05	1e-05	1e-05	1e-05	1e-05	1e-05	1e-05	1e-05	1e-05	1e-05	1e-05	1e-05	1e-05	0.0721018	1e-05	0.450034	1e-05	1e-05	1e-05	1e-05	0.181551	1e-05	1e-05	1e-05	1e-05	1e-05	1e-05	1e-05	1e-05	1e-05	1e-05	1e-05	1e-05	1e-05	1e-05	1e-05	1e-05	1e-05	1e-05	1e-05	0.216819
ARMC10	1e-05	1e-05	1e-05	1e-05	1e-05	1e-05	1e-05	1e-05	1e-05	1e-05	1e-05	1e-05	1e-05	1e-05	1e-05	1e-05	1e-05	1e-05	1e-05	1e-05	1e-05	1e-05	1e-05	1e-05	1e-05	1e-05	1e-05	1e-05	1e-05	1.97364	1e-05	1e-05	1e-05	1e-05	1e-05	1e-05	1e-05	1e-05	1e-05	1e-05	1e-05	1e-05	1e-05	1e-05	1e-05	1e-05	1e-05	1e-05	1e-05
ARMC5	1e-05	1e-05	1.63211	1e-05	1e-05	1e-05	1e-05	1e-05	1e-05	1e-05	1e-05	1e-05	0.928538	1.58216	1e-05	1e-05	1e-05	1e-05	1e-05	1e-05	1e-05	1e-05	0.882834	1e-05	1e-05	1e-05	1e-05	1e-05	1e-05	1e-05	1.49393	1e-05	0.990773	1e-05	1e-05	1e-05	1e-05	1e-05	1e-05	1e-05	1e-05	1e-05	1e-05	1e-05	1e-05	1e-05	1e-05	1e-05	1e-05
ARMC6	1e-05	1e-05	1e-05	1e-05	1e-05	1e-05	1e-05	1e-05	1e-05	1e-05	1e-05	1e-05	1e-05	1e-05	1e-05	1e-05	1e-05	1e-05	1e-05	12.2407	1e-05	1e-05	1e-05	1e-05	1e-05	1e-05	1e-05	1e-05	1e-05	1e-05	1e-05	1e-05	1e-05	1e-05	1e-05	1e-05	1e-05	1e-05	1e-05	1e-05	1e-05	0.0688461	1e-05	1e-05	1e-05	1e-05	1e-05	1e-05	1e-05
ARMC8	1e-05	1e-05	1e-05	1e-05	1e-05	1e-05	1e-05	1e-05	1e-05	1e-05	1e-05	1e-05	1e-05	1e-05	1e-05	1e-05	1e-05	1e-05	1e-05	1e-05	1e-05	1e-05	1e-05	1e-05	1e-05	1e-05	1e-05	1e-05	0.060934	1e-05	1e-05	1e-05	1e-05	1e-05	1e-05	1e-05	1e-05	1e-05	0.150161	1e-05	1e-05	1e-05	1e-05	1e-05	1e-05	1e-05	1e-05	1e-05	1e-05
ARMC9	1e-05	1e-05	1e-05	1e-05	1e-05	1e-05	1e-05	1e-05	1e-05	1e-05	1e-05	1e-05	1e-05	1e-05	1e-05	1e-05	1e-05	1e-05	1e-05	1e-05	1e-05	1e-05	1e-05	1e-05	1e-05	1e-05	1e-05	1e-05	1e-05	1e-05	1e-05	1e-05	1e-05	1e-05	1e-05	1e-05	1e-05	1e-05	1e-05	1e-05	1e-05	1e-05	1e-05	1e-05	1e-05	1e-05	1e-05	1e-05	1e-05
ARMCX1	2.2596	2.54952	2.76675	0.6355	0.569017	0.0926832	2.68614	0.46593	0.478984	2.56695	0.473983	2.77789	2.71377	2.55032	2.77399	2.61719	2.88042	2.79442	2.58955	3.35844	0.476189	0.577045	2.84351	2.27011	2.75609	2.42879	2.58847	2.65759	2.741	0.485551	2.73757	0.335065	2.52944	2.42704	2.97561	0.376846	0.661135	0.539011	2.51576	2.7388	0.366528	2.62712	2.8486	2.36968	2.38399	2.91661	2.77519	0.62136	0.574803
ARMCX2	1e-05	1e-05	1e-05	1e-05	1e-05	1e-05	1e-05	1e-05	1e-05	1e-05	1e-05	1e-05	1e-05	1e-05	1e-05	1e-05	1e-05	1e-05	1e-05	1e-05	1e-05	1e-05	1e-05	1e-05	1e-05	1e-05	1e-05	1e-05	1e-05	1e-05	1e-05	1e-05	1e-05	1e-05	1e-05	1e-05	1e-05	1e-05	1e-05	1e-05	1e-05	1e-05	1e-05	1e-05	1e-05	1e-05	1e-05	1e-05	1e-05
ARMCX3	1e-05	1e-05	1e-05	1e-05	1e-05	0.557709	1e-05	1e-05	1e-05	1e-05	1e-05	1e-05	1e-05	1e-05	1e-05	1e-05	1e-05	1e-05	0.0520946	1.70731	1e-05	1e-05	1e-05	1e-05	1e-05	1e-05	1e-05	1e-05	1e-05	1e-05	1e-05	1e-05	1e-05	1e-05	1e-05	1e-05	1e-05	1e-05	1e-05	1e-05	1e-05	1e-05	1e-05	1e-05	1e-05	1e-05	1.36396	1e-05	1e-05
ARMCX5	1e-05	1e-05	1e-05	1e-05	1e-05	1e-05	1e-05	1e-05	1e-05	1e-05	1e-05	1e-05	1e-05	1e-05	1e-05	1e-05	1e-05	1e-05	1e-05	1e-05	1e-05	1e-05	1e-05	1e-05	1e-05	1e-05	1e-05	1e-05	1e-05	1e-05	1e-05	1e-05	1e-05	1e-05	1e-05	1e-05	1e-05	1e-05	1e-05	1e-05	1e-05	1e-05	1e-05	1e-05	1e-05	1e-05	1e-05	1e-05	1e-05
ARMH3	1e-05	1e-05	1e-05	1e-05	1e-05	1e-05	1e-05	1e-05	1e-05	1e-05	1e-05	1e-05	1e-05	0.0680985	1e-05	1e-05	1e-05	1e-05	1e-05	1e-05	1e-05	1e-05	1e-05	1e-05	1e-05	1e-05	1e-05	1e-05	1e-05	1e-05	1e-05	1e-05	1e-05	1e-05	1e-05	1e-05	1e-05	1e-05	1e-05	1e-05	1e-05	1e-05	1e-05	1e-05	1e-05	1e-05	1e-05	1e-05	1e-05
ARMT1	1e-05	1e-05	1e-05	1e-05	1e-05	1e-05	1e-05	1e-05	1e-05	1e-05	1e-05	1e-05	1e-05	1e-05	1e-05	1e-05	1e-05	1e-05	1e-05	1e-05	5.95772	1e-05	1e-05	1e-05	1e-05	1e-05	1e-05	1e-05	1e-05	1e-05	1e-05	1e-05	1e-05	1e-05	1e-05	1e-05	1e-05	1e-05	1e-05	1e-05	5.37321	1e-05	1e-05	1e-05	1e-05	1e-05	1e-05	11.081	0.453256
ARNT	1e-05	1e-05	1e-05	1e-05	1e-05	1e-05	1e-05	1e-05	1e-05	1e-05	1e-05	1e-05	1e-05	0.0853307	1e-05	1e-05	1e-05	1e-05	1e-05	1e-05	1e-05	1e-05	1e-05	1e-05	1e-05	1e-05	1e-05	1e-05	1e-05	1e-05	1e-05	1e-05	1e-05	1e-05	1e-05	1e-05	1e-05	1e-05	1e-05	1e-05	1e-05	1e-05	1e-05	1e-05	1e-05	1e-05	1e-05	1e-05	1e-05
ARPC1A	0.595143	2.54952	2.76675	0.679863	2.58907	1.85563	2.68614	2.46211	2.63341	0.949944	2.91754	0.666481	2.71377	2.55032	0.877043	1.56175	0.0339336	0.139717	2.58955	0.662367	0.963122	0.462448	0.398747	2.27011	2.75609	2.42879	0.877229	2.65759	2.741	0.844416	2.73757	1.21802	0.943591	1.57582	2.97561	0.99611	0.301483	0.635996	2.51576	0.523666	0.560386	2.62712	2.8486	2.36968	1.96338	2.91661	2.77519	0.597721	2.94865
ARPC1B	2.2596	2.54952	0.658851	0.511268	0.455929	2.66382	0.342523	2.46211	2.63341	2.56695	2.91754	2.77789	2.71377	2.55032	0.215598	2.40193	2.88042	2.79442	2.58955	3.99274	2.95167	2.55642	0.385527	0.624842	2.75609	2.42879	2.58847	2.65759	1.67199	2.70796	0.504578	2.865	2.52944	2.42704	2.97561	2.51193	0.770993	0.49314	2.51576	2.42715	0.0989036	1.8526	0.613116	0.0652094	0.646124	1.15568	1.11166	2.62817	2.94865
ARPC2	0.542491	0.274466	0.41036	0.301144	0.48636	6.10152	1.61902	0.369882	0.289115	0.277418	3.00372	0.222531	1.61107	0.434699	6.8328	0.551994	0.578096	0.732712	0.44661	0.688551	0.689239	0.182115	1.2055	0.518228	0.990471	0.597549	0.738904	0.473063	1.81492	0.540868	0.506912	0.777096	0.539236	0.312438	0.493381	0.624117	0.815031	0.815921	0.546987	0.175017	0.291362	0.307317	0.514385	0.812269	1.16674	0.295542	0.438409	0.467152	2.00108
ARPC3	1e-05	1e-05	1e-05	0.29591	1.20151	1e-05	0.530386	1e-05	1e-05	1e-05	1e-05	1e-05	0.143876	1e-05	1e-05	1e-05	1e-05	1e-05	1e-05	0.749838	1e-05	1e-05	1e-05	1e-05	1e-05	1e-05	1e-05	1e-05	0.246742	0.732582	1e-05	1e-05	1e-05	1e-05	1e-05	1e-05	1e-05	1e-05	0.0705842	1e-05	1e-05	0.0600544	1e-05	1e-05	1e-05	1e-05	1e-05	1e-05	1e-05
ARPC4	1e-05	1e-05	1e-05	1e-05	0.86085	1e-05	1e-05	2.29347	1e-05	1e-05	0.535617	1e-05	1e-05	1e-05	1e-05	1e-05	1e-05	1e-05	1e-05	1e-05	0.470085	1e-05	1e-05	1e-05	1e-05	1e-05	1e-05	1.04525	1e-05	1e-05	3.89933	1e-05	1e-05	1e-05	0.525401	1e-05	1e-05	1e-05	1e-05	0.162765	1e-05	1e-05	1e-05	1e-05	1e-05	11.8707	1e-05	1e-05	0.415876
ARPC5	0.138773	2.54952	2.76675	4.0413	2.58907	2.66382	0.523404	2.46211	1.67131	2.56695	1.49278	2.77789	0.36566	0.378403	2.77399	0.892857	2.88042	0.859682	2.58955	3.35844	2.81914	2.55642	0.527377	0.756354	1.54912	2.42879	2.58847	0.800417	0.769166	2.70796	0.239026	2.865	2.52944	2.22635	2.97561	0.750315	3.02486	2.71306	2.51576	2.7388	2.39571	2.62712	0.441782	0.415729	2.38399	2.3078	2.77519	2.62817	5.85425
ARPC5L	0.885778	1e-05	1e-05	1e-05	1e-05	1e-05	1e-05	1e-05	2.20727	1e-05	1e-05	1e-05	1e-05	1e-05	1e-05	1e-05	0.725997	1e-05	1e-05	1e-05	1e-05	1e-05	1e-05	1e-05	1e-05	1e-05	1e-05	0.939678	1e-05	1e-05	1e-05	1e-05	1e-05	1e-05	1e-05	1e-05	1e-05	1e-05	1e-05	1e-05	0.956022	1e-05	1e-05	1e-05	1e-05	1e-05	1e-05	1e-05	1e-05
ARPIN	1e-05	1e-05	1e-05	1e-05	1e-05	1e-05	1e-05	1e-05	1e-05	1e-05	1e-05	1e-05	1e-05	1e-05	1e-05	1e-05	1e-05	1e-05	1e-05	1e-05	1e-05	1e-05	1e-05	1e-05	1e-05	1e-05	1e-05	1e-05	1e-05	1e-05	1e-05	1e-05	1e-05	1e-05	1e-05	1e-05	1e-05	1e-05	1e-05	1e-05	1e-05	1e-05	1e-05	1e-05	1e-05	1e-05	1e-05	1e-05	2.69247
ARR3	1e-05	1e-05	1e-05	1e-05	1e-05	1e-05	1e-05	1e-05	1e-05	1e-05	1e-05	1e-05	1e-05	1e-05	1e-05	1e-05	1e-05	1e-05	1e-05	1e-05	1e-05	1e-05	1e-05	1e-05	1e-05	1e-05	1e-05	1e-05	1e-05	1e-05	1e-05	1e-05	1e-05	1e-05	1e-05	1e-05	1e-05	1e-05	1e-05	1e-05	1e-05	1e-05	1e-05	1e-05	1e-05	1e-05	1e-05	1e-05	1e-05
ARRB1	1e-05	1e-05	1e-05	0.24816	1e-05	1e-05	1e-05	1e-05	0.580427	1e-05	1e-05	1e-05	0.568776	1e-05	1e-05	1e-05	1e-05	1e-05	0.273732	1e-05	1e-05	1e-05	1e-05	1e-05	1e-05	0.165727	1e-05	1e-05	1e-05	1e-05	0.540711	1.10907	1e-05	1e-05	1e-05	1e-05	1e-05	1e-05	0.469943	1e-05	1e-05	1e-05	1e-05	1e-05	1e-05	1e-05	1e-05	1e-05	1e-05
ARRB2	1e-05	1e-05	1e-05	1e-05	1e-05	1e-05	1e-05	1e-05	1e-05	1e-05	1e-05	1e-05	1e-05	1e-05	1e-05	1e-05	1e-05	1e-05	1e-05	1e-05	1e-05	1e-05	1e-05	1e-05	1e-05	1e-05	1e-05	1e-05	1e-05	1e-05	1e-05	1e-05	1e-05	1e-05	1e-05	1e-05	1e-05	1e-05	1e-05	1e-05	1e-05	1e-05	1e-05	1e-05	1e-05	1e-05	1e-05	1.59999	1e-05
ARRDC1	1e-05	1e-05	1e-05	1e-05	1e-05	1e-05	1e-05	1e-05	1e-05	1e-05	1e-05	1e-05	1e-05	1e-05	1e-05	1e-05	1e-05	1e-05	1e-05	1e-05	1e-05	1e-05	1e-05	1e-05	1e-05	1e-05	1e-05	1e-05	1e-05	1e-05	1e-05	1e-05	1e-05	1e-05	1e-05	1e-05	1e-05	1e-05	1e-05	1e-05	1e-05	1e-05	1e-05	1e-05	1e-05	1e-05	1e-05	1e-05	1e-05
ARSA	1e-05	1e-05	1e-05	0.105937	1e-05	1e-05	1e-05	1e-05	1e-05	1e-05	1e-05	1e-05	1e-05	1e-05	0.629644	1e-05	1e-05	1.26067	1e-05	1e-05	1e-05	1e-05	1e-05	1e-05	1e-05	0.541127	1e-05	1e-05	1e-05	1e-05	1e-05	1e-05	0.409338	1e-05	2.67799	1e-05	1e-05	1e-05	1e-05	0.301039	1e-05	0.451176	1e-05	1e-05	1e-05	0.191273	1e-05	1e-05	1e-05
ARSB	1e-05	1e-05	1e-05	1e-05	1e-05	1e-05	1e-05	1e-05	1e-05	1e-05	1e-05	1e-05	1e-05	1e-05	1e-05	1e-05	1e-05	1e-05	1e-05	0.369646	1e-05	1e-05	1e-05	1e-05	1e-05	1e-05	1e-05	1e-05	1e-05	1e-05	1e-05	1e-05	1e-05	1e-05	1e-05	1e-05	1e-05	1e-05	1e-05	1e-05	1e-05	1e-05	1e-05	1e-05	1e-05	1e-05	1e-05	1e-05	1e-05
ARSD	1e-05	1e-05	1e-05	1e-05	2.69426	1e-05	3.47332	1e-05	1e-05	1e-05	1e-05	1e-05	1e-05	1e-05	1e-05	1e-05	1.88605	1e-05	1e-05	0.968188	1e-05	1e-05	1e-05	1e-05	1e-05	1e-05	1e-05	1e-05	1e-05	2.9869	3.2527	1e-05	1e-05	1e-05	1e-05	2.68949	1e-05	1e-05	2.83039	1e-05	1e-05	1e-05	0.0844869	1e-05	4.29595	1e-05	1e-05	1e-05	1e-05
ARSF	1e-05	1e-05	1e-05	1e-05	1e-05	1e-05	1e-05	1e-05	1e-05	1e-05	1e-05	1e-05	1e-05	1e-05	1e-05	1e-05	1e-05	1e-05	1e-05	1e-05	1e-05	1e-05	1e-05	1e-05	1e-05	1e-05	1e-05	1e-05	1e-05	1e-05	1e-05	1e-05	1e-05	1e-05	1e-05	1e-05	1e-05	1e-05	1e-05	1e-05	1e-05	1e-05	1e-05	1e-05	1e-05	1e-05	1e-05	1e-05	1e-05
ARSH	1e-05	1e-05	1e-05	1e-05	1e-05	1e-05	1e-05	1e-05	1e-05	1e-05	1e-05	1e-05	1e-05	1e-05	1e-05	1e-05	1.83216	1e-05	1e-05	0.940525	1e-05	1e-05	1e-05	1e-05	1e-05	1e-05	1e-05	1e-05	1e-05	1e-05	1e-05	1e-05	1e-05	1e-05	1e-05	1e-05	1e-05	1e-05	1e-05	1e-05	1e-05	1e-05	1e-05	1e-05	1e-05	1e-05	1e-05	1e-05	1e-05
ARSL	1e-05	1e-05	1e-05	0.313762	1e-05	1e-05	0.330685	1e-05	1e-05	1e-05	1e-05	1e-05	1e-05	1e-05	1e-05	0.142402	1.9432	1e-05	1e-05	0.997527	1e-05	1e-05	1e-05	1e-05	1e-05	1e-05	1e-05	1e-05	1e-05	1e-05	1e-05	1e-05	1e-05	1e-05	1e-05	1e-05	1e-05	1e-05	1e-05	0.165533	1e-05	1e-05	1e-05	1e-05	1e-05	1e-05	1e-05	0.351973	1e-05
ART3	2.2596	2.54952	2.46205	0.291581	2.58907	1.27067	2.68614	0.213506	2.63341	2.56695	2.91754	2.77789	2.71377	2.55032	2.77399	3.3202	2.88042	2.37384	0.201116	3.30639	2.81914	2.55642	2.84351	2.27011	1.22313	2.42879	2.58847	0.0477508	2.741	2.70796	1.87921	0.263051	0.0622429	0.109661	2.97561	2.51193	3.02486	6.36585	0.0252276	2.7388	0.0753882	2.62712	2.8486	3.90806	2.38399	2.91661	0.141338	2.62817	9.9743
ART4	1e-05	1e-05	1e-05	1e-05	1e-05	0.177599	1e-05	1e-05	1e-05	1e-05	1e-05	1e-05	1e-05	1e-05	1e-05	1e-05	0.0868319	1e-05	1e-05	1e-05	1e-05	1e-05	1e-05	1e-05	1e-05	1e-05	1e-05	1e-05	1e-05	1e-05	1e-05	1e-05	0.102931	1e-05	1e-05	1e-05	1e-05	1e-05	1e-05	1e-05	1e-05	1e-05	1e-05	1e-05	1e-05	1e-05	1e-05	1e-05	1e-05
ARVCF	0.0562416	1e-05	1e-05	1e-05	1e-05	0.13397	1e-05	1e-05	1e-05	1e-05	1e-05	1e-05	1e-05	1e-05	1e-05	0.0765941	0.11145	1e-05	0.161639	1e-05	1e-05	1e-05	1e-05	1e-05	1e-05	1e-05	1e-05	1e-05	1e-05	1e-05	1e-05	1e-05	1e-05	0.0947815	1e-05	1e-05	1e-05	1e-05	1e-05	1e-05	0.0622308	1e-05	1e-05	1e-05	1e-05	1e-05	1e-05	1e-05	1e-05
ASAH1	0.566683	1.16947	0.691934	0.0457992	0.848404	0.660681	2.07535	0.668822	17.2969	4.23651	1.97932	1.33819	2.16064	2.4358	2.04078	1.03403	0.786684	0.778463	9.46896	3.62521	1.32579	1.43355	0.591038	0.4334	0.412293	1.17322	1.1132	1.86468	0.726216	1.34395	0.717391	1.24975	0.66937	0.793437	5.91096	0.781023	1.19715	1.88317	0.816158	1.70086	0.643347	1.28994	8.02105	0.86041	0.682012	0.594307	1.93954	0.749505	0.31099
ASAP1	1e-05	1e-05	1e-05	1e-05	1e-05	1e-05	1e-05	1e-05	1e-05	1e-05	1e-05	1e-05	1e-05	1e-05	1e-05	1e-05	1e-05	1e-05	1e-05	1e-05	1e-05	1e-05	0.0164284	1e-05	1e-05	1e-05	1e-05	1e-05	1e-05	1e-05	1e-05	1e-05	1e-05	1e-05	1e-05	1e-05	1e-05	1e-05	1e-05	1e-05	1e-05	1e-05	1e-05	1e-05	1e-05	1e-05	1e-05	1e-05	1e-05
ASAP2	2.2596	0.40778	2.76675	2.65573	0.179214	2.66382	2.68614	0.198622	2.63341	2.56695	0.13508	2.77789	2.71377	2.55032	2.77399	2.61719	2.88042	2.79442	2.58955	3.35844	2.81914	0.126195	2.84351	2.27011	2.75609	0.325429	0.167467	2.65759	0.111833	0.138272	2.73757	0.309459	2.52944	2.42704	0.0875856	2.51193	3.02486	2.71306	2.51576	0.423062	2.39571	0.108953	2.8486	2.36968	0.0616258	0.190747	0.127261	2.62817	0.186332
ASAP3	1e-05	1e-05	1e-05	1e-05	1e-05	1e-05	1e-05	1e-05	1e-05	1e-05	1e-05	1e-05	1e-05	1e-05	1e-05	1e-05	1e-05	1e-05	1e-05	1e-05	1e-05	1e-05	1e-05	1e-05	1e-05	1e-05	1e-05	1e-05	1e-05	1e-05	1e-05	1e-05	1e-05	1e-05	1e-05	1e-05	1e-05	1e-05	1e-05	1e-05	1e-05	1e-05	1e-05	1e-05	1e-05	1e-05	1e-05	1e-05	1e-05
ASCC1	1e-05	0.654141	0.42833	1e-05	1e-05	1e-05	1e-05	1e-05	1e-05	1e-05	0.941568	1e-05	0.111737	1e-05	1e-05	1e-05	1e-05	1e-05	1e-05	0.4261	1e-05	1e-05	0.223441	0.254841	1e-05	1e-05	1e-05	1e-05	1e-05	1e-05	1e-05	0.477668	1e-05	0.098884	1e-05	1e-05	1e-05	1e-05	1e-05	0.619703	1e-05	1e-05	0.118438	1e-05	1e-05	0.0828722	1e-05	1e-05	1e-05
ASCC2	1e-05	1e-05	1e-05	1e-05	1e-05	0.360934	0.366878	1e-05	1e-05	1e-05	0.111966	1e-05	1e-05	1e-05	0.401569	1e-05	1e-05	1e-05	1e-05	1e-05	1e-05	1e-05	1e-05	1e-05	1e-05	1e-05	1e-05	1e-05	1e-05	1e-05	1e-05	1e-05	1e-05	1e-05	1e-05	1e-05	1e-05	1e-05	0.0776201	1e-05	1e-05	1e-05	1e-05	0.154153	1e-05	1e-05	1e-05	1e-05	1e-05
ASCC3	1e-05	1e-05	1e-05	0.0714901	0.15331	1e-05	1e-05	1e-05	1e-05	1e-05	1e-05	1e-05	1e-05	1e-05	1e-05	1e-05	1e-05	0.188356	1e-05	1e-05	1e-05	1e-05	1e-05	1e-05	0.126664	1e-05	1e-05	0.453465	1e-05	1e-05	1e-05	0.0165494	0.161179	1e-05	1e-05	0.0453827	0.114519	1e-05	0.195029	0.395317	0.00721032	1e-05	0.116458	1e-05	1e-05	0.468127	1e-05	0.0537498	1e-05
ASDURF	1e-05	1e-05	1e-05	1e-05	1e-05	1e-05	1e-05	1e-05	1e-05	1e-05	1e-05	1e-05	1e-05	1e-05	1e-05	1e-05	1e-05	1e-05	1e-05	1e-05	1e-05	1e-05	1e-05	2.67507	1e-05	1e-05	1e-05	1e-05	1e-05	1e-05	1e-05	1e-05	1e-05	1e-05	1e-05	1e-05	1e-05	1e-05	1e-05	1e-05	1e-05	1e-05	1e-05	1e-05	1e-05	1e-05	1e-05	1e-05	1e-05
ASF1A	1e-05	1e-05	1.98922	1e-05	1e-05	1e-05	1e-05	1e-05	1e-05	1e-05	1e-05	1e-05	1e-05	1e-05	1e-05	1e-05	1e-05	1e-05	1e-05	1e-05	1e-05	1e-05	0.381959	1e-05	1e-05	1e-05	1e-05	1e-05	1e-05	1e-05	1e-05	1e-05	1e-05	1e-05	1e-05	1e-05	1e-05	1e-05	1e-05	1e-05	1e-05	1e-05	1e-05	1e-05	1e-05	1e-05	1e-05	1e-05	1e-05
ASF1B	1e-05	1e-05	1e-05	1e-05	1e-05	1e-05	1e-05	1e-05	1e-05	1e-05	1e-05	1e-05	1e-05	1e-05	1e-05	1e-05	1e-05	0.0216379	1e-05	1e-05	1e-05	1e-05	1e-05	1e-05	1e-05	1e-05	1e-05	1e-05	1e-05	1e-05	1e-05	1e-05	1e-05	1e-05	1e-05	1e-05	1e-05	1e-05	1e-05	1e-05	1e-05	1e-05	1e-05	1e-05	1e-05	1e-05	1e-05	1e-05	1e-05
ASGR1	1e-05	0.080989	1e-05	1e-05	1e-05	1e-05	1e-05	1e-05	1e-05	1e-05	1e-05	1e-05	1e-05	1e-05	1e-05	1e-05	1e-05	1e-05	1e-05	1e-05	1e-05	1e-05	1e-05	1e-05	1e-05	1e-05	1e-05	1e-05	1e-05	1e-05	1e-05	1e-05	1e-05	1e-05	1e-05	1e-05	1e-05	1e-05	1e-05	1e-05	1e-05	1e-05	1e-05	1e-05	1e-05	1e-05	1e-05	1e-05	1e-05
ASGR2	1e-05	1e-05	1e-05	1e-05	1e-05	1e-05	2.77502	1e-05	1e-05	1e-05	0.532216	1e-05	1e-05	1e-05	1e-05	1e-05	1e-05	0.13705	1e-05	1e-05	1.50342	1e-05	1e-05	1e-05	1e-05	1e-05	1e-05	1e-05	1e-05	1e-05	4.36351	1e-05	1e-05	1e-05	2.54045	1e-05	1e-05	1e-05	1e-05	1e-05	1e-05	1e-05	1e-05	1e-05	1e-05	1e-05	1e-05	1e-05	1e-05
ASH2L	1e-05	1e-05	1e-05	1e-05	1e-05	1e-05	1e-05	1e-05	1e-05	1e-05	1e-05	1e-05	1e-05	1e-05	1e-05	1e-05	1e-05	1e-05	1e-05	1e-05	1e-05	1e-05	1e-05	1e-05	1e-05	1e-05	1e-05	1e-05	1e-05	1e-05	1e-05	1e-05	1e-05	1e-05	1e-05	0.478972	1e-05	1e-05	1e-05	1e-05	0.0343526	1e-05	1e-05	0.739783	1e-05	1e-05	1e-05	1e-05	1e-05
ASL	0.572255	1.29402	1.07044	0.898746	15.9083	0.800572	0.459327	8.6675	11.5411	0.425799	1.71999	18.8441	13.4388	0.573871	2.81783	0.163342	1.6728	0.90792	9.75802	1.06073	6.7108	16.2934	1.13838	0.232168	10.9766	18.7268	10.118	20.7299	0.578842	0.33251	9.35033	8.16924	0.548607	15.8828	1.28028	0.742079	2.13878	1.09615	15.9492	1.52107	0.376946	1.03014	0.844339	0.669028	0.64103	1.4799	4.26883	1.47522	9.07855
ASMTL	1e-05	1.20441	1.97646	1e-05	1e-05	1e-05	1e-05	1e-05	1e-05	1e-05	1e-05	1e-05	1e-05	1e-05	1e-05	1e-05	1e-05	1e-05	2.28607	1e-05	1e-05	1e-05	1e-05	1e-05	1e-05	1e-05	1e-05	1e-05	1e-05	1e-05	1e-05	1e-05	1e-05	1e-05	1e-05	1e-05	1e-05	1e-05	1e-05	1e-05	1e-05	1e-05	1e-05	1e-05	1e-05	1e-05	1e-05	1e-05	1e-05
ASNS	1e-05	1e-05	1e-05	0.0644646	1e-05	1e-05	1e-05	1e-05	0.105556	1e-05	1e-05	1e-05	0.0672317	1e-05	1e-05	1e-05	1e-05	1e-05	1e-05	1e-05	1e-05	1.27669	1e-05	0.87627	1e-05	1.80751	1e-05	1e-05	0.108939	0.133965	1e-05	1e-05	1e-05	1e-05	1e-05	1e-05	1e-05	0.875012	1e-05	1e-05	1.24571	1e-05	1.67542	1e-05	1e-05	1e-05	1e-05	1e-05	1e-05
ASPA	1e-05	1e-05	1e-05	1e-05	1e-05	1e-05	1e-05	1e-05	0.0243728	1e-05	1e-05	1e-05	1e-05	1e-05	1e-05	1e-05	1e-05	1e-05	1e-05	1e-05	1e-05	1e-05	1e-05	1e-05	1e-05	1e-05	1e-05	1e-05	1e-05	1e-05	1e-05	1e-05	1e-05	1e-05	1e-05	1e-05	1e-05	1e-05	1e-05	1e-05	1e-05	1e-05	1e-05	1e-05	1e-05	1e-05	1e-05	1e-05	1e-05
ASPDH	1e-05	1e-05	1e-05	1e-05	1e-05	1e-05	1e-05	1e-05	1e-05	1e-05	1e-05	1e-05	1e-05	2.07575	1e-05	1e-05	1e-05	1e-05	1e-05	1e-05	1e-05	1e-05	1e-05	1e-05	1e-05	1e-05	1e-05	1e-05	1e-05	1e-05	1e-05	1e-05	1e-05	1e-05	1e-05	1e-05	1e-05	1e-05	1e-05	1e-05	1e-05	1e-05	1e-05	1e-05	1e-05	1e-05	1e-05	1e-05	1e-05
ASPH	2.03741	1e-05	1e-05	1e-05	1e-05	1e-05	1e-05	1e-05	0.0549093	1e-05	1e-05	0.96044	1e-05	1e-05	1e-05	1e-05	1e-05	1e-05	1e-05	0.139062	1e-05	1.06844	0.636118	1e-05	0.710606	1e-05	1e-05	1e-05	1e-05	1e-05	1e-05	1e-05	1e-05	7.95782	1e-05	0.0320746	1e-05	0.944207	1e-05	1e-05	1e-05	1e-05	1e-05	1e-05	1e-05	1e-05	1e-05	1e-05	2.92932
ASPHD1	1e-05	1e-05	1e-05	1e-05	1e-05	1e-05	1e-05	1e-05	1e-05	1e-05	1e-05	1e-05	1e-05	1e-05	1e-05	1e-05	1e-05	1e-05	1e-05	1e-05	1e-05	1e-05	1e-05	1e-05	1e-05	1e-05	1e-05	1e-05	1e-05	1e-05	1e-05	1e-05	1e-05	1e-05	1e-05	1e-05	1e-05	1e-05	1e-05	1e-05	1e-05	1e-05	1e-05	1e-05	1e-05	1e-05	1e-05	1e-05	1e-05
ASPN	1e-05	0.605494	1e-05	0.855045	1e-05	1e-05	1e-05	1e-05	1e-05	1e-05	1e-05	1e-05	1e-05	0.221832	1e-05	1e-05	1e-05	0.63038	1e-05	1e-05	1e-05	1e-05	1e-05	1e-05	1e-05	1e-05	1e-05	0.795474	1e-05	0.603212	1e-05	1e-05	1e-05	1e-05	1e-05	1e-05	1e-05	1e-05	1e-05	1.00828	1e-05	1e-05	1e-05	1e-05	1e-05	1e-05	1e-05	1e-05	1e-05
ASPRV1	1e-05	1e-05	1e-05	1e-05	1e-05	1e-05	1e-05	1e-05	1e-05	1e-05	1e-05	1e-05	1e-05	1e-05	1e-05	1e-05	1e-05	1e-05	1e-05	1e-05	1e-05	1e-05	1e-05	1e-05	1e-05	1e-05	1e-05	1e-05	1e-05	1e-05	1e-05	1e-05	1e-05	1e-05	1e-05	1e-05	1e-05	1e-05	1e-05	1e-05	1e-05	1e-05	1e-05	1e-05	1e-05	1e-05	1e-05	1e-05	1e-05
ASPSCR1	1e-05	0.493099	1e-05	1e-05	1e-05	0.238822	1e-05	0.115507	1e-05	1e-05	0.528835	1e-05	0.271192	1e-05	1e-05	1e-05	1e-05	1e-05	0.168593	1e-05	0.198146	1e-05	1e-05	1e-05	1e-05	1e-05	1e-05	1e-05	1e-05	1e-05	1e-05	1e-05	1e-05	1e-05	1e-05	1e-05	1e-05	0.389052	1e-05	1e-05	0.252814	1e-05	0.773729	1e-05	1e-05	0.100062	1e-05	1e-05	1e-05
ASRGL1	1e-05	1e-05	1e-05	1e-05	1e-05	1e-05	1e-05	1e-05	1e-05	1e-05	1e-05	1e-05	1e-05	1e-05	1e-05	1e-05	1e-05	1e-05	1e-05	1e-05	1e-05	1e-05	1e-05	1e-05	1e-05	1e-05	1e-05	1e-05	0.18804	1e-05	1e-05	1e-05	1e-05	1e-05	1e-05	1e-05	1e-05	1e-05	1e-05	1e-05	1e-05	1e-05	0.767539	1e-05	1e-05	1e-05	1e-05	1e-05	1e-05
ASS1	1.11576	2.62307	0.528056	1.41846	1.2743	0.850308	0.659669	0.420708	0.900335	0.945964	0.810786	0.162059	0.822475	0.914187	0.194925	0.657001	1.02516	0.460579	0.77199	1.76573	1.15797	1.04095	0.584769	1.37154	1.12137	0.501499	1.31198	0.429931	0.51248	1.20696	1.57812	0.284215	0.550951	1.17337	0.113245	0.252987	0.569628	3.55952	1.0904	0.0241085	0.951004	0.879392	0.763015	1.15042	1.00276	0.369379	1.18446	1.3534	0.981534
ASTN1	1e-05	1e-05	1e-05	1e-05	1e-05	1e-05	1e-05	1e-05	1e-05	1e-05	1e-05	1e-05	1e-05	1e-05	1e-05	1e-05	1e-05	1e-05	1e-05	1e-05	1e-05	1e-05	1e-05	1e-05	1e-05	1e-05	1e-05	1e-05	1e-05	1e-05	1e-05	1e-05	1e-05	1e-05	1e-05	1e-05	1e-05	1e-05	1e-05	1e-05	1e-05	1e-05	1e-05	1e-05	1e-05	1e-05	1e-05	1e-05	1e-05
ATAD1	3.12068	3.13101	2.76675	2.65573	2.61794	2.66382	2.68614	2.46211	2.63341	2.56695	2.91754	0.914666	2.71377	2.55032	2.77399	2.61719	2.88042	0.105979	2.58955	3.35844	2.81914	2.55642	2.84351	0.874885	0.140752	2.42879	2.58847	1.95657	0.405581	2.70796	0.750651	2.865	0.802837	0.216376	2.97561	3.07351	3.02486	2.71306	3.31271	2.7388	2.39571	2.62712	2.43452	2.36968	2.38399	2.91661	3.06124	2.62817	2.94865
ATAD2B	1e-05	1e-05	1e-05	0.396148	1e-05	1e-05	1e-05	1e-05	1e-05	1e-05	1e-05	1e-05	0.567237	1e-05	1e-05	1e-05	1e-05	1e-05	1e-05	1e-05	1e-05	1e-05	1e-05	1e-05	1e-05	1e-05	1e-05	1e-05	1e-05	1e-05	1e-05	1e-05	1e-05	1e-05	1e-05	0.491521	1e-05	1e-05	1e-05	1e-05	1e-05	1e-05	1e-05	1e-05	1e-05	1e-05	1e-05	1e-05	1e-05
ATAD3A	1e-05	1e-05	1e-05	1e-05	0.384178	1e-05	1e-05	1e-05	1e-05	1e-05	1e-05	1e-05	1e-05	1e-05	1e-05	0.0684989	1e-05	0.0159822	1e-05	1e-05	1e-05	1e-05	0.216937	1e-05	0.033738	1e-05	1e-05	1e-05	0.240005	1e-05	1e-05	1e-05	1e-05	0.0362432	0.0183535	1e-05	1e-05	1e-05	1e-05	1e-05	1e-05	1e-05	1e-05	1e-05	1e-05	1e-05	1e-05	1e-05	0.157255
ATAD3B	1e-05	1e-05	1e-05	1e-05	1e-05	1e-05	0.70735	0.583447	1e-05	1e-05	1e-05	1e-05	1e-05	1e-05	1e-05	0.0700557	1e-05	0.0163454	1e-05	1e-05	1e-05	1e-05	0.221867	1e-05	0.596178	1e-05	1e-05	1e-05	1e-05	1e-05	1e-05	1e-05	1e-05	0.0370669	0.960859	1e-05	1e-05	1e-05	0.753829	1e-05	1e-05	1e-05	1e-05	1e-05	1e-05	1e-05	1e-05	1e-05	1e-05
ATAD3C	1e-05	1e-05	1e-05	1e-05	1e-05	1e-05	1e-05	1e-05	1e-05	1e-05	1e-05	1e-05	1e-05	1e-05	1e-05	0.106291	1e-05	0.0248	1e-05	1e-05	1e-05	1e-05	1e-05	1e-05	0.0523521	1e-05	1e-05	1e-05	1e-05	1e-05	1e-05	1e-05	1e-05	0.0562395	0.0284796	1e-05	1e-05	1e-05	1e-05	1e-05	1e-05	1e-05	1e-05	1e-05	1e-05	1e-05	1e-05	1e-05	0.244016
ATAT1	1e-05	1e-05	1e-05	1e-05	1e-05	1e-05	1e-05	0.679102	1e-05	1e-05	1e-05	1e-05	0.677664	1e-05	1e-05	1e-05	1e-05	1e-05	1e-05	1e-05	1e-05	1e-05	0.921703	1e-05	1e-05	1e-05	1e-05	0.201831	1.46734	1.0523	1e-05	1e-05	1e-05	1e-05	0.106423	1e-05	1e-05	1e-05	1e-05	1e-05	0.457259	1e-05	1e-05	1e-05	0.970846	1e-05	1.1346	0.840188	0.690575
ATE1	1e-05	0.23232	1e-05	1e-05	1e-05	1e-05	1e-05	1e-05	1e-05	1e-05	30.0602	1e-05	1e-05	1e-05	1e-05	1e-05	27.7636	1e-05	1e-05	35.9268	13.6426	1e-05	1e-05	26.3561	1e-05	18.9174	1e-05	1e-05	1e-05	1e-05	1e-05	1e-05	1e-05	1e-05	1e-05	1e-05	1e-05	1e-05	1e-05	1e-05	1e-05	1e-05	9.91951	1e-05	1e-05	1e-05	1e-05	18.1274	0.618044
ATF6	1e-05	1e-05	1e-05	1e-05	1e-05	1e-05	1e-05	1e-05	1e-05	0.0571181	0.139809	1e-05	1e-05	1e-05	1e-05	1e-05	1e-05	1e-05	1e-05	1e-05	1e-05	1e-05	1e-05	1e-05	1e-05	1e-05	1e-05	1e-05	1e-05	1e-05	1e-05	1e-05	1e-05	1e-05	1e-05	0.345023	1e-05	1e-05	1e-05	1e-05	1e-05	1e-05	1e-05	1e-05	1e-05	1e-05	1e-05	1e-05	1e-05
ATF6B	1e-05	1e-05	1e-05	1e-05	1e-05	1e-05	1e-05	1e-05	1e-05	1e-05	1e-05	1e-05	1e-05	1e-05	1e-05	1e-05	1e-05	1e-05	1e-05	1e-05	1e-05	1e-05	1e-05	1e-05	1e-05	1e-05	1e-05	1e-05	1e-05	1e-05	1e-05	1e-05	1e-05	1e-05	1e-05	1e-05	0.84763	1e-05	1e-05	1e-05	1e-05	1e-05	1e-05	1e-05	1e-05	1e-05	1e-05	1e-05	1e-05
ATF7	1e-05	1e-05	1e-05	1e-05	1e-05	1e-05	1e-05	1e-05	1e-05	1e-05	1e-05	1e-05	1e-05	1e-05	1e-05	1e-05	1e-05	1e-05	1e-05	1e-05	1e-05	1e-05	1e-05	1e-05	1e-05	1e-05	1e-05	1e-05	1e-05	1e-05	1e-05	1e-05	1e-05	1e-05	1e-05	1e-05	1e-05	1e-05	1e-05	1e-05	1e-05	1e-05	1e-05	1e-05	1e-05	1e-05	1e-05	1e-05	1e-05
ATG101	1e-05	1e-05	1e-05	1e-05	1e-05	1e-05	1e-05	1e-05	1e-05	0.25195	1e-05	1e-05	1e-05	1e-05	1e-05	1e-05	1e-05	1e-05	1e-05	1e-05	1e-05	1e-05	1e-05	1e-05	1e-05	1e-05	1e-05	1e-05	1e-05	1e-05	1e-05	1e-05	1e-05	1e-05	1e-05	1e-05	1e-05	1e-05	1e-05	1e-05	1e-05	1e-05	1e-05	1e-05	1e-05	1e-05	1e-05	1e-05	1e-05
ATG13	1e-05	1e-05	1e-05	1e-05	1e-05	1e-05	1e-05	1e-05	1e-05	1e-05	1e-05	1e-05	1e-05	1e-05	1e-05	1e-05	1e-05	1e-05	0.291458	1e-05	1e-05	1e-05	1e-05	1e-05	0.219166	1e-05	1e-05	1e-05	1e-05	1e-05	1e-05	0.111171	1e-05	1e-05	0.0866617	1e-05	1e-05	1e-05	1e-05	1e-05	1e-05	1e-05	1e-05	0.303679	1e-05	1e-05	1e-05	1e-05	1e-05
ATG16L1	1e-05	1e-05	1e-05	0.174759	1e-05	1e-05	1e-05	1e-05	1e-05	1e-05	1e-05	1e-05	1e-05	1e-05	1e-05	1e-05	1e-05	1e-05	1e-05	1e-05	1e-05	1e-05	1e-05	1e-05	1e-05	1e-05	1e-05	1e-05	1e-05	0.141831	1e-05	1e-05	1e-05	1e-05	1e-05	1e-05	1e-05	1e-05	1e-05	1e-05	1e-05	1e-05	1e-05	1e-05	1e-05	1e-05	1e-05	1e-05	1e-05
ATG2A	1e-05	1e-05	1e-05	1e-05	1e-05	1e-05	1e-05	1e-05	1e-05	1e-05	1e-05	1e-05	1e-05	1e-05	1e-05	1e-05	1e-05	1e-05	1e-05	1e-05	1e-05	1e-05	1e-05	1e-05	1e-05	1e-05	1e-05	1e-05	1e-05	1e-05	1e-05	1e-05	1e-05	1e-05	1e-05	1e-05	1e-05	1e-05	1e-05	1e-05	1e-05	1e-05	1e-05	1e-05	1e-05	1e-05	1e-05	1e-05	1e-05
ATG2B	1e-05	1e-05	1e-05	1e-05	1e-05	1e-05	1e-05	1e-05	1e-05	1e-05	1e-05	1e-05	0.113339	1e-05	1e-05	1e-05	1e-05	1e-05	1e-05	1e-05	1e-05	1e-05	1e-05	1e-05	1e-05	1e-05	1e-05	1e-05	1e-05	1e-05	1e-05	1e-05	1e-05	1e-05	1e-05	1e-05	1e-05	1e-05	1e-05	1e-05	0.175726	1e-05	1e-05	0.0642876	1e-05	1e-05	1e-05	1e-05	1e-05
ATG3	1e-05	0.967879	1e-05	1e-05	1e-05	1e-05	1e-05	1e-05	1.49572	0.895068	2.02837	1e-05	1.41996	1e-05	1e-05	1.77786	1e-05	1e-05	1e-05	1e-05	1e-05	1.31437	2.2272	1e-05	1e-05	1e-05	1e-05	1e-05	1e-05	1e-05	1e-05	1e-05	1e-05	1e-05	1.38287	1e-05	1.91997	1.13033	1.53819	1e-05	1e-05	1e-05	2.54456	2.11607	1e-05	1e-05	1e-05	1e-05	1e-05
ATG4B	1e-05	1e-05	1e-05	1e-05	1e-05	1e-05	1e-05	1e-05	1e-05	5.50937	1e-05	1e-05	1e-05	1e-05	1e-05	1e-05	1e-05	1e-05	1e-05	0.139267	1e-05	1e-05	1e-05	1e-05	1e-05	1e-05	1e-05	1e-05	1e-05	1e-05	1e-05	1e-05	1e-05	1e-05	1e-05	1e-05	1e-05	1e-05	1e-05	1e-05	0.812279	1e-05	1e-05	1e-05	1e-05	1e-05	1e-05	1e-05	1e-05
ATG5	1e-05	1e-05	1e-05	1e-05	1e-05	1e-05	1e-05	1e-05	1e-05	1e-05	1e-05	1e-05	1e-05	1e-05	1e-05	1e-05	0.253405	1e-05	1e-05	1e-05	1e-05	1e-05	1e-05	1e-05	1e-05	1e-05	1e-05	1e-05	1e-05	1e-05	1e-05	1e-05	1e-05	1e-05	1e-05	0.124125	1e-05	1e-05	1e-05	0.502841	1e-05	1e-05	1e-05	1e-05	1e-05	0.704581	1e-05	1e-05	1e-05
ATG7	1e-05	1e-05	1e-05	1e-05	1e-05	1e-05	1e-05	1e-05	1e-05	1e-05	1e-05	1e-05	1e-05	1e-05	1e-05	1e-05	0.134621	1e-05	1e-05	1e-05	1e-05	1e-05	1e-05	1e-05	0.0858142	0.0657061	1e-05	1e-05	1e-05	1e-05	0.0504078	1e-05	1e-05	1e-05	1e-05	0.0874264	0.236043	1e-05	1e-05	0.0707257	1e-05	1e-05	1e-05	1e-05	0.0922035	1e-05	1e-05	0.184391	0.106357
ATG9A	2.2596	3.09313	2.76675	2.65573	2.58907	2.11274	2.81469	2.46211	2.63341	2.56695	2.91754	4.81281	2.71377	2.55032	2.77399	2.61719	1.64223	2.79442	1.37472	3.35844	2.81914	2.43125	2.4527	2.27011	2.75609	2.42879	2.10918	2.51294	1.30987	3.16328	2.73757	2.865	2.52944	2.42704	3.01963	2.51193	1.0729	2.71306	2.51576	1.81485	2.39571	2.62712	2.8486	2.36968	2.38399	4.87744	2.77519	2.62817	3.8671
ATIC	0.180781	0.149737	0.659052	0.0319059	0.437258	0.121782	0.21825	0.806235	0.198594	0.0822147	0.0517492	0.254896	0.36499	0.139986	0.689848	0.620907	0.222683	0.273444	0.180355	0.175009	0.0809936	0.055711	0.234847	0.187847	0.255495	0.129419	0.0937631	0.384628	0.233413	2.71154	0.365228	0.294814	0.252952	0.266257	0.250512	0.129829	0.478073	0.290239	0.358167	0.203402	0.244029	0.0531718	0.0661873	0.483558	0.313059	0.0700856	0.0371597	0.14677	0.448127
ATL1	1e-05	1e-05	1e-05	1e-05	1e-05	1e-05	1e-05	1e-05	1e-05	1e-05	1e-05	1e-05	1e-05	1e-05	1e-05	1e-05	1e-05	1e-05	1e-05	1e-05	1e-05	1e-05	1e-05	1e-05	1e-05	1e-05	1e-05	1e-05	1e-05	1e-05	1e-05	1e-05	1e-05	1e-05	1e-05	1e-05	1e-05	1e-05	1e-05	1e-05	1e-05	1e-05	1e-05	1e-05	1e-05	1e-05	1e-05	1e-05	1e-05
ATL2	1e-05	1e-05	1e-05	1e-05	1e-05	1e-05	1e-05	1e-05	1e-05	1e-05	1e-05	1e-05	1e-05	1e-05	1e-05	1e-05	1e-05	1e-05	1e-05	1e-05	1e-05	1e-05	1e-05	1e-05	1e-05	1e-05	1e-05	1e-05	1e-05	1e-05	1e-05	1e-05	1e-05	1e-05	1e-05	1e-05	1e-05	1e-05	1e-05	1e-05	1e-05	1e-05	0.223522	1e-05	1e-05	0.438226	1e-05	1e-05	1e-05
ATL3	2.2596	2.54952	2.76675	2.65573	2.58907	0.312114	2.20375	2.71132	1.2464	2.56695	0.736807	1.43024	2.71377	2.55032	0.968316	0.721664	0.691105	0.421475	2.58955	2.15921	2.81914	2.55642	2.84351	2.27011	2.75609	2.42879	2.58847	2.65759	2.741	2.70796	2.73757	1.08638	0.47806	2.42704	2.97561	2.51193	1.33762	0.850389	2.51576	0.0635664	0.434775	2.62712	2.8486	2.36968	0.321486	0.967209	2.77519	2.62817	2.94865
ATM	1e-05	1e-05	1e-05	1e-05	1e-05	1e-05	1e-05	1e-05	1e-05	1e-05	1e-05	1e-05	1e-05	1e-05	0.0130867	1e-05	1e-05	1e-05	1e-05	1e-05	1e-05	1e-05	1e-05	1e-05	1e-05	1e-05	1e-05	1e-05	1e-05	1e-05	1e-05	1e-05	1e-05	1e-05	1e-05	1e-05	1e-05	1e-05	1e-05	1e-05	1e-05	1e-05	1e-05	1e-05	1e-05	1e-05	1e-05	1e-05	1e-05
ATOX1	1e-05	1e-05	1e-05	1e-05	1e-05	1e-05	1e-05	1e-05	1e-05	1e-05	1e-05	1e-05	1e-05	1e-05	1e-05	1e-05	1e-05	1e-05	1e-05	1e-05	1e-05	1e-05	1e-05	1e-05	1e-05	1e-05	1e-05	1e-05	1e-05	1e-05	0.584822	1e-05	1e-05	1e-05	1e-05	1e-05	1e-05	1e-05	1e-05	1e-05	1e-05	1e-05	1e-05	1e-05	1e-05	1e-05	1e-05	1e-05	1e-05
ATP10B	1e-05	1e-05	1e-05	1e-05	1e-05	1e-05	0.410683	1e-05	1e-05	1e-05	1e-05	1e-05	1e-05	1e-05	1e-05	1e-05	1e-05	1e-05	1e-05	1e-05	1e-05	1e-05	1e-05	1e-05	1e-05	1e-05	1e-05	1e-05	1e-05	1e-05	1e-05	1e-05	1e-05	1e-05	1e-05	1e-05	1e-05	1e-05	1e-05	1e-05	1e-05	1e-05	1e-05	1e-05	1e-05	1e-05	1e-05	1e-05	1e-05
ATP11A	1e-05	1e-05	1e-05	1e-05	1e-05	1e-05	1e-05	1e-05	1e-05	1e-05	1e-05	1e-05	1e-05	1e-05	1e-05	1e-05	1e-05	1e-05	1e-05	1e-05	1e-05	1e-05	1e-05	1e-05	1e-05	1e-05	1e-05	0.213314	1e-05	1e-05	1e-05	1e-05	1e-05	1e-05	1e-05	1e-05	1e-05	1e-05	1e-05	1e-05	1e-05	1e-05	1e-05	1e-05	1e-05	1e-05	0.47013	1e-05	1e-05
ATP11B	1e-05	1e-05	1e-05	1e-05	1e-05	1e-05	1e-05	1e-05	1e-05	1e-05	1e-05	1e-05	1e-05	1e-05	1e-05	1e-05	1e-05	1e-05	1e-05	1e-05	1e-05	1e-05	1e-05	1e-05	1e-05	1e-05	1e-05	1e-05	1e-05	1e-05	1e-05	1e-05	1e-05	1e-05	1e-05	1e-05	1e-05	0.107602	1e-05	1e-05	1e-05	1e-05	0.140092	1e-05	1e-05	1e-05	1e-05	1e-05	1e-05
ATP11C	1e-05	1e-05	1e-05	1e-05	1e-05	1e-05	1e-05	1e-05	1e-05	1e-05	1e-05	1e-05	1e-05	1e-05	1e-05	1e-05	1e-05	1e-05	1e-05	1e-05	1e-05	1e-05	1e-05	1e-05	1e-05	1e-05	1e-05	1e-05	1e-05	1e-05	1e-05	1e-05	1e-05	1e-05	1e-05	1e-05	1e-05	1e-05	1e-05	1e-05	1e-05	1e-05	1e-05	1e-05	1e-05	1e-05	1e-05	1e-05	1e-05
ATP12A	0.0330115	2.54952	0.0486697	0.0819106	0.0447124	2.66382	2.68614	2.46211	0.0805649	0.128136	2.91754	2.77789	2.71377	0.0656922	2.77399	2.61719	2.88042	2.79442	2.58955	3.35844	2.81914	0.13682	2.84351	2.27011	2.75609	0.0606952	2.58847	0.0237293	2.741	0.0362177	0.0244446	2.865	0.0738621	0.0704352	2.97561	0.063403	3.02486	0.0517773	0.0196227	0.10051	2.39571	2.62712	2.8486	2.36968	2.38399	2.91661	2.77519	0.0515981	2.94865
ATP13A1	0.266945	0.194857	0.488337	0.302839	0.134971	0.380286	0.60787	0.383007	0.0269774	0.105176	0.971643	0.246599	0.0540773	0.517313	0.120732	0.101159	0.308654	0.166777	0.0765565	1.25124	1.02789	0.230467	0.138106	0.0344319	0.622962	0.317972	0.416813	0.379794	0.0901617	0.602427	0.491989	0.715348	0.803529	0.849089	0.325307	0.280285	0.405216	0.201512	0.221466	0.0704244	0.387781	0.148424	0.0486304	0.497582	0.315916	0.562478	0.321096	0.352964	0.611484
ATP13A4	1e-05	1e-05	1e-05	1e-05	1e-05	1e-05	1e-05	1e-05	1e-05	1e-05	1e-05	1e-05	1e-05	1e-05	1e-05	1e-05	1e-05	1e-05	1e-05	1e-05	1e-05	1e-05	1e-05	1e-05	1e-05	1e-05	1e-05	1e-05	1e-05	1e-05	1e-05	1e-05	1e-05	1e-05	1e-05	1e-05	1e-05	1e-05	1e-05	1e-05	1e-05	1e-05	1e-05	1e-05	1e-05	1e-05	1e-05	1e-05	1e-05
ATP1A1	0.0856585	0.0956359	0.0504079	0.0848359	0.0463092	0.0474092	0.031864	0.0493358	0.140626	0.132713	0.196152	0.0177123	0.175961	0.0680384	0.127267	0.234123	0.108989	0.0658815	0.0754334	0.747817	0.0398965	0.141706	0.0953642	0.115145	0.0752088	0.12495	0.140045	0.0245768	0.124549	0.0375112	0.263887	0.133747	0.0765001	0.0965121	0.430199	0.1526	0.0321332	0.0536265	0.045109	0.1041	0.0269272	0.538404	0.136356	0.385365	0.0449075	13.2722	0.0403155	0.0534409	0.0680278
ATP1A2	0.0319112	2.54952	0.0470474	0.0791802	0.043222	2.66382	2.68614	2.46211	0.0778794	0.123865	2.91754	0.0165315	2.71377	0.0635025	2.77399	2.61719	2.88042	2.79442	2.58955	3.35844	2.81914	0.132259	0.00278718	2.27011	2.75609	0.058672	2.58847	0.0229383	0.0161285	0.0350105	0.0236298	2.865	0.0714001	0.136366	2.97561	0.0612896	3.02486	0.0500514	0.0421017	0.0971599	0.025132	0.502511	2.8486	2.36968	0.0419137	2.91661	2.77519	0.0498781	2.94865
ATP1A3	0.0354568	0.0793276	0.0522748	0.087978	0.0480244	0.139695	0.0777076	0.0645391	0.0865326	0.137628	0.0665814	0.0183683	0.0618985	0.0705583	0.0544426	0.119357	0.115284	0.0554505	0.0872082	0.190186	0.111611	0.146955	0.00309686	0.0881929	0.0654276	0.0651911	0.120154	0.0254871	0.0179205	0.0389005	0.0262553	0.1155	0.0793334	0.100087	0.0950769	0.0680995	0.0651146	0.0556127	0.0467797	0.107955	0.0279245	0.558345	0.0850054	0.112098	0.0465707	0.16054	0.0905253	0.0554202	0.0520982
ATP1A4	0.0335907	2.54952	0.0495235	0.0833476	0.0454968	2.66382	2.68614	2.46211	0.0819783	0.130384	2.91754	0.0174016	2.71377	0.0668447	2.77399	2.61719	2.88042	2.79442	2.58955	3.35844	2.81914	0.13922	0.00293387	2.27011	2.75609	0.06176	2.58847	0.0241456	0.012961	0.0368531	0.0248735	2.865	0.075158	0.0716709	2.97561	0.0645153	3.02486	0.0526857	0.0443176	0.102274	0.0264548	0.528959	2.8486	2.36968	2.38399	2.91661	2.77519	0.0525033	2.94865
ATP1B1	1e-05	1e-05	1e-05	0.496361	0.565815	1e-05	1e-05	1e-05	1e-05	1e-05	1e-05	1e-05	1e-05	0.670926	1e-05	1e-05	1e-05	1.42906	1e-05	0.772705	1e-05	1e-05	0.364985	0.577921	1e-05	1e-05	0.892383	1e-05	1e-05	0.13822	1e-05	0.401175	1e-05	1e-05	0.461288	1e-05	1e-05	1e-05	1e-05	1e-05	0.00966388	0.554872	1e-05	1e-05	1e-05	1e-05	1e-05	1e-05	1e-05
ATP1B3	0.436989	1e-05	1e-05	1e-05	1e-05	1e-05	1e-05	1e-05	1e-05	1e-05	1e-05	1e-05	1e-05	1e-05	1e-05	1e-05	1e-05	1e-05	1e-05	1e-05	1e-05	1e-05	1e-05	1e-05	1e-05	1.05538	1e-05	1e-05	1e-05	1e-05	1e-05	1e-05	1e-05	1e-05	1e-05	1e-05	1e-05	0.301837	1e-05	1e-05	1e-05	0.112825	1e-05	1e-05	1e-05	1e-05	1e-05	1e-05	1e-05
ATP2A1	2.2596	2.54952	2.76675	2.65573	2.58907	2.66382	0.0707766	2.46211	2.63341	2.56695	0.0396828	2.77789	0.0510551	2.55032	2.77399	0.081423	2.88042	0.770372	0.0484395	3.35844	2.81914	0.0682585	0.151814	2.27011	2.75609	2.42879	0.15493	0.0266314	0.0489459	0.0395214	0.0271758	2.865	0.0155067	2.42704	2.97561	2.51193	3.02486	0.208865	2.51576	0.030747	2.39571	2.62712	2.8486	2.36968	2.38399	0.0327358	0.16832	0.0204227	0.109891
ATP2A2	0.161163	0.0515576	0.162807	1.159	0.519032	0.170683	0.109592	0.0503695	0.145773	0.229934	0.0383144	0.259661	0.0492946	0.0551884	0.160039	0.0786153	0.0899275	2.18313	0.0509874	0.406905	0.142998	0.157634	0.368617	0.204599	0.11008	0.169557	0.149587	0.0257131	0.165133	0.0381586	0.163935	0.150732	0.0669438	0.108868	0.258429	0.114314	0.425924	0.201663	0.174398	0.0296868	0.109504	0.10845	0.280479	0.150933	0.0836098	0.42747	0.953442	0.148791	0.106101
ATP2A3	1e-05	1e-05	1e-05	1e-05	1e-05	1e-05	0.082579	1e-05	1e-05	0.164642	1e-05	0.155066	1e-05	1e-05	1e-05	1e-05	1e-05	1e-05	1e-05	1e-05	1e-05	1e-05	0.0562255	1e-05	1e-05	1e-05	0.0987399	1e-05	1e-05	0.236013	1e-05	1e-05	0.014972	1e-05	0.0872044	1e-05	1e-05	1e-05	1e-05	0.210566	1e-05	0.198324	1e-05	1e-05	0.0338331	1e-05	0.106506	1e-05	0.115825
ATP2B1	1e-05	1e-05	1e-05	1e-05	0.00976544	1e-05	1e-05	1e-05	1e-05	1e-05	1e-05	1e-05	1e-05	1e-05	1e-05	1e-05	1e-05	1e-05	1e-05	1e-05	1e-05	1e-05	1e-05	1e-05	1e-05	1e-05	0.0123548	1e-05	1e-05	1e-05	1e-05	1e-05	1e-05	1e-05	1e-05	1e-05	1e-05	1e-05	1e-05	1e-05	1e-05	1e-05	1e-05	1e-05	1e-05	1e-05	1e-05	1e-05	1e-05
ATP2B2	1e-05	1e-05	1e-05	1e-05	0.00976544	1e-05	0.693282	1e-05	1e-05	0.316441	1e-05	1e-05	1e-05	1e-05	1e-05	1e-05	1e-05	1e-05	1e-05	1e-05	1e-05	1e-05	1e-05	1e-05	1e-05	1e-05	0.0123548	0.494929	1e-05	1e-05	1e-05	1e-05	1e-05	0.112657	0.259587	1e-05	1e-05	1e-05	1e-05	1e-05	1e-05	1e-05	0.0202928	1e-05	1e-05	1e-05	1e-05	0.319302	1e-05
ATP2B3	1e-05	1e-05	1e-05	1e-05	0.0103573	1e-05	1e-05	1e-05	1e-05	1e-05	1e-05	1e-05	1e-05	1e-05	1e-05	1e-05	1e-05	1e-05	1e-05	1e-05	1e-05	1e-05	1e-05	1e-05	1e-05	1e-05	0.0131035	1e-05	1e-05	1e-05	1e-05	1e-05	1e-05	1e-05	1e-05	1e-05	1e-05	1e-05	1e-05	1e-05	1e-05	1e-05	1e-05	1e-05	1e-05	1e-05	1e-05	1e-05	1e-05
ATP2B4	1e-05	1e-05	1e-05	0.0878559	0.0100527	1e-05	1e-05	1e-05	1e-05	1e-05	1e-05	1e-05	1e-05	1e-05	1e-05	1e-05	1e-05	1e-05	1e-05	1e-05	1e-05	0.0688117	1e-05	1e-05	1e-05	1e-05	0.0127182	1e-05	1e-05	1e-05	0.0821762	1e-05	1e-05	1e-05	0.0880458	1e-05	1e-05	0.157265	1e-05	0.112745	1e-05	1e-05	1.4833	1e-05	1e-05	1e-05	1e-05	1e-05	1e-05
ATP2C1	1e-05	1e-05	1e-05	1e-05	1e-05	1e-05	1e-05	1e-05	1e-05	1e-05	1e-05	1e-05	1e-05	1e-05	1e-05	1e-05	1e-05	1e-05	1e-05	1e-05	1e-05	1e-05	1e-05	1e-05	1e-05	1e-05	1e-05	1e-05	1e-05	1e-05	1e-05	1e-05	1e-05	0.0318016	0.132017	1e-05	1e-05	1e-05	1e-05	1e-05	1e-05	1e-05	1e-05	1e-05	1e-05	1e-05	1e-05	0.0234258	1e-05
ATP4A	0.0335907	1e-05	1e-05	1e-05	1e-05	1e-05	1e-05	1e-05	1e-05	0.0230267	1e-05	1e-05	1e-05	1e-05	1e-05	1e-05	1e-05	1e-05	1e-05	1e-05	1e-05	1e-05	1e-05	1e-05	1e-05	1e-05	1e-05	1e-05	0.00401637	0.0368531	1e-05	1e-05	1e-05	1e-05	1e-05	1e-05	1e-05	1e-05	1e-05	1e-05	0.234837	1e-05	1e-05	1e-05	1e-05	1e-05	0.223772	0.0525033	1e-05
ATP4B	1e-05	1e-05	1e-05	1e-05	1e-05	1e-05	1e-05	1e-05	1e-05	1e-05	1e-05	1e-05	1e-05	1e-05	1e-05	1e-05	1e-05	1e-05	1e-05	1e-05	1e-05	1e-05	1e-05	1e-05	1e-05	1e-05	1e-05	1e-05	1e-05	1e-05	1e-05	1e-05	1e-05	1e-05	1e-05	1e-05	1e-05	1e-05	1e-05	1e-05	1e-05	1e-05	1e-05	1e-05	1e-05	1e-05	1e-05	1e-05	1e-05
ATP5F1A	6.28122	5.67095	0.234357	6.82645	6.86479	7.67484	9.74448	2.13405	6.90437	12.3905	5.72107	3.54522	3.99883	8.66495	6.79916	15.182	11.7475	9.92247	14.041	8.40554	4.24119	12.8336	5.17682	3.89229	7.60841	3.95081	5.69225	5.06804	0.831861	6.6312	13.2604	4.57423	7.4543	9.461	12.2349	4.4958	2.29935	21.4989	9.51277	6.41534	8.19146	1.77786	6.77836	5.38142	4.53535	10.1958	4.34093	5.1267	3.97607
ATP5F1B	0.194246	0.450216	3.97647	0.13425	1.42009	4.60526	1.66747	1.41213	2.31372	1.4973	8.39613	0.133582	0.464697	0.894624	9.57058	15.6289	8.73803	3.57907	0.201245	1.04544	3.79579	1.25282	0.843787	1.7758	0.272786	3.4682	12.6086	6.44125	1.94789	0.459856	1.01534	1.33177	2.31556	0.324773	1.52983	1.28108	18.262	0.398483	1.79138	4.82975	3.53907	0.137069	2.53638	1.46245	0.579281	0.616604	1.56685	6.70107	1.08892
ATP5F1C	1e-05	1e-05	1e-05	1e-05	1e-05	1e-05	1e-05	1e-05	1e-05	1e-05	1e-05	1e-05	1e-05	1e-05	1e-05	1e-05	1e-05	1e-05	1e-05	0.451619	1e-05	1e-05	1e-05	1e-05	1e-05	1e-05	1e-05	1e-05	1e-05	0.270844	1e-05	1e-05	1e-05	1e-05	1e-05	0.224893	0.183504	1e-05	1e-05	1e-05	1e-05	1e-05	1e-05	1e-05	1e-05	1e-05	1e-05	0.143834	1e-05
ATP5F1D	0.681013	3.65305	1.67896	2.20349	2.93714	2.46787	1.71195	2.53725	2.34886	2.07091	3.28475	8.17057	2.54803	1.30006	2.37645	3.90895	3.19452	2.53191	2.96396	10.7229	2.22299	3.89597	2.6447	4.05243	2.87508	3.091	2.51011	2.86506	1.72175	3.55231	2.58917	1.8587	7.245	2.13321	2.6363	2.9449	3.58992	3.34437	2.74317	1.31738	3.1311	1.23586	14.4127	2.20448	3.51728	3.41531	3.53779	1.21831	3.72911
ATP5ME	1e-05	1e-05	1e-05	1e-05	1e-05	1e-05	1e-05	1e-05	1e-05	1e-05	1e-05	1e-05	1e-05	1e-05	1e-05	1e-05	1e-05	1e-05	1e-05	1e-05	1e-05	1e-05	1e-05	1e-05	1e-05	1e-05	1e-05	1e-05	1e-05	1e-05	1e-05	1e-05	1e-05	1e-05	1e-05	1e-05	1e-05	1e-05	1e-05	1e-05	1e-05	1e-05	1e-05	1e-05	1e-05	1e-05	1e-05	1e-05	1e-05
ATP5MF	1e-05	1e-05	1e-05	1e-05	1e-05	1e-05	1e-05	1e-05	1e-05	1.25476	1e-05	1e-05	1e-05	1e-05	1e-05	1e-05	1e-05	1e-05	1e-05	1e-05	1e-05	1e-05	1e-05	1e-05	1e-05	1e-05	1e-05	1e-05	1e-05	1e-05	1e-05	1e-05	1e-05	1e-05	1e-05	1e-05	1e-05	1e-05	1e-05	1e-05	1e-05	1e-05	1e-05	1e-05	1e-05	4.34571	1e-05	1e-05	1e-05
ATP5MG	1.48853	1e-05	1e-05	2.3778	1e-05	1e-05	1e-05	1e-05	1e-05	0.574382	1e-05	1e-05	1e-05	1e-05	1.09284	1e-05	1e-05	1e-05	1e-05	1e-05	1e-05	1e-05	1e-05	1e-05	1e-05	1e-05	1e-05	1e-05	1e-05	1e-05	0.568889	1.08128	1.77575	1e-05	1e-05	1e-05	1e-05	1e-05	1e-05	1.82103	1e-05	1e-05	1e-05	1e-05	1e-05	1e-05	1e-05	1.1301	1e-05
ATP5MPL	1e-05	1e-05	1e-05	1e-05	1e-05	1e-05	1e-05	1e-05	1e-05	1e-05	1e-05	1e-05	1e-05	1e-05	1e-05	1e-05	1e-05	1e-05	1e-05	1e-05	1e-05	1e-05	1e-05	1e-05	1e-05	1e-05	1e-05	1e-05	1e-05	1e-05	1e-05	1e-05	1e-05	1e-05	1e-05	1e-05	1e-05	1e-05	1e-05	1e-05	1e-05	1e-05	1e-05	1e-05	1e-05	1e-05	1e-05	1e-05	1e-05
ATP5PB	1e-05	0.310152	1e-05	1e-05	1e-05	1.91812	1e-05	1e-05	0.183981	1e-05	1e-05	1e-05	0.147445	0.310123	0.407831	1e-05	1e-05	1e-05	1e-05	1e-05	1e-05	1e-05	1e-05	1e-05	1e-05	1e-05	1e-05	1e-05	1e-05	1e-05	1e-05	1e-05	0.220249	1e-05	1e-05	1e-05	1e-05	1e-05	1e-05	1e-05	1e-05	1e-05	1e-05	1e-05	1e-05	1e-05	1e-05	1e-05	1e-05
ATP5PD	0.793663	1.21151	1.60054	4.45267	0.484761	1.31788	1.40597	0.820188	1.72381	1.34061	4.46733	6.62187	0.747784	0.286268	1.04992	1.34808	2.00956	9.05984	1.28866	1.94896	0.740425	1.52829	7.98659	3.58305	0.366827	1.60807	7.64253	1.19656	1.22188	0.349481	1.61424	1.44759	0.875008	0.781256	1.01558	1.72413	1.44727	0.750225	1.36044	0.491917	1.72286	4.71876	1.48171	0.743678	1.34434	0.824254	2.42922	1.04273	2.19769
ATP5PF	1e-05	1e-05	1e-05	1e-05	1e-05	1e-05	1e-05	1e-05	1e-05	1e-05	1e-05	34.3288	1e-05	1e-05	1e-05	1e-05	1e-05	1e-05	1e-05	1e-05	1e-05	24.3849	1e-05	1e-05	1e-05	1e-05	1e-05	1e-05	1e-05	1e-05	1e-05	1e-05	1e-05	1e-05	1e-05	1e-05	1e-05	1e-05	1e-05	1e-05	1.94071	1e-05	1e-05	1e-05	15.8768	2.67401	1e-05	0.117902	1e-05
ATP5PO	1.10926	0.849444	0.212498	2.39939	2.0092	20.7197	18.4166	0.617587	0.0415689	9.51634	1.29169	0.509776	1.72916	3.15452	11.1125	2.36763	0.994325	1.48994	1.23439	17.7252	2.01116	22.65	4.3748	0.386624	15.0283	19.1372	15.9521	0.369444	27.3365	4.56454	0.933673	0.899036	1.09289	1.03738	20.6156	5.00959	0.622098	0.669084	0.279753	2.75783	2.81684	1.16558	8.91791	17.9852	0.231892	4.10118	1.5327	22.463	2.33724
ATP6AP1	1e-05	0.0224419	1e-05	1e-05	0.0316744	1e-05	1e-05	1e-05	1e-05	1e-05	1e-05	0.205021	1e-05	1e-05	1e-05	6.83976	1e-05	1e-05	1e-05	1.31009	1e-05	1e-05	1e-05	1e-05	1e-05	0.480602	1e-05	1e-05	0.0100203	0.170956	0.789368	1e-05	7.04581	1e-05	1e-05	1e-05	1e-05	1e-05	1e-05	1e-05	1e-05	0.187352	1e-05	1e-05	1e-05	1e-05	1e-05	1e-05	1e-05
ATP6AP2	1e-05	1e-05	1e-05	1e-05	1e-05	1e-05	1e-05	1e-05	1e-05	1e-05	1e-05	0.10884	1e-05	1e-05	1e-05	0.617994	1e-05	1e-05	1e-05	1e-05	1e-05	1e-05	1e-05	1e-05	1e-05	1e-05	1e-05	1e-05	1e-05	1e-05	1e-05	1e-05	1e-05	1e-05	1e-05	1e-05	1e-05	1e-05	1e-05	1e-05	0.147658	1e-05	0.384575	1e-05	1e-05	1e-05	1e-05	1e-05	1e-05
ATP6V0A1	1e-05	1e-05	1e-05	0.0363101	1e-05	1e-05	0.0751574	1e-05	1e-05	1e-05	1e-05	1e-05	1e-05	1e-05	1e-05	0.0746496	1e-05	2.91135	0.529526	1e-05	1e-05	1e-05	1e-05	1e-05	1e-05	1e-05	1e-05	1e-05	1e-05	1e-05	1e-05	0.589468	1e-05	1e-05	1e-05	1e-05	0.32965	1e-05	0.485786	1e-05	1e-05	1e-05	1e-05	1e-05	1e-05	1e-05	1e-05	1e-05	1e-05
ATP6V0A2	1e-05	1e-05	1e-05	1e-05	1e-05	1e-05	1e-05	1e-05	1e-05	1e-05	1e-05	1e-05	1e-05	1e-05	1e-05	1e-05	1e-05	1e-05	1e-05	1e-05	1e-05	1e-05	0.0676452	1e-05	1e-05	1e-05	1e-05	1e-05	1e-05	1e-05	1e-05	1e-05	1e-05	1e-05	1e-05	1e-05	1e-05	1e-05	1e-05	1e-05	1e-05	1e-05	1e-05	1e-05	1e-05	1e-05	1e-05	1e-05	0.0735414
ATP6V0A4	1e-05	1e-05	1e-05	1e-05	1e-05	1e-05	1e-05	1e-05	1e-05	1e-05	1e-05	1e-05	1e-05	1e-05	1e-05	1e-05	1e-05	1e-05	1e-05	1e-05	1e-05	1e-05	1e-05	1e-05	1e-05	1e-05	1e-05	1e-05	1e-05	1e-05	1e-05	1e-05	1e-05	1e-05	1e-05	1e-05	1e-05	1e-05	1e-05	1e-05	1e-05	1e-05	1e-05	1e-05	1e-05	1e-05	1e-05	1e-05	1e-05
ATP6V0C	1e-05	1.92169	1e-05	1e-05	1e-05	1e-05	2.97896	1e-05	1e-05	0.314407	1e-05	1e-05	1e-05	1e-05	1e-05	1e-05	1e-05	1e-05	1.1617	0.517322	1e-05	1e-05	1e-05	1e-05	1e-05	1e-05	0.494286	1e-05	1e-05	1e-05	0.633154	1e-05	1e-05	0.244441	1.61091	1e-05	3.33653	1e-05	1e-05	1e-05	1.61833	1.00568	1e-05	1e-05	1e-05	1e-05	1e-05	1e-05	1e-05
ATP6V0D1	1e-05	1e-05	1e-05	1e-05	1e-05	1e-05	1e-05	1e-05	1e-05	1e-05	1e-05	1e-05	1e-05	1e-05	1e-05	1e-05	1e-05	1e-05	1e-05	1e-05	1e-05	1e-05	1e-05	1e-05	1e-05	1e-05	1e-05	1e-05	1e-05	1e-05	1e-05	1e-05	1e-05	1e-05	1e-05	1e-05	1e-05	1e-05	0.054831	1e-05	1e-05	1e-05	1e-05	1e-05	0.425221	1e-05	1e-05	1e-05	1e-05
ATP6V1A	1.21058	1.80437	0.978852	0.078147	0.115771	1.82606	2.96368	1.94615	4.82671	1.10152	2.86387	1.16345	2.34313	8.52019	0.919844	1.06532	0.0503955	2.16847	1.99167	0.214996	1.23011	1.36742	4.12785	2.25687	1.60772	1.77202	1.64206	1.74206	2.46939	1.58036	1.37876	2.61105	0.629746	1.26107	1.55369	1.18897	1.21656	0.647337	2.1506	2.73247	0.0561761	0.96125	1.40275	1.20908	1.9289	1.57732	1.50675	1.01646	1.65291
ATP6V1B1	1e-05	1e-05	1e-05	1e-05	1e-05	0.267567	1e-05	1e-05	1e-05	1e-05	1e-05	1e-05	1e-05	1e-05	1e-05	1e-05	1e-05	1e-05	1e-05	1e-05	1e-05	1e-05	1e-05	1e-05	1e-05	1e-05	1e-05	1e-05	1e-05	1e-05	1e-05	1e-05	1e-05	1e-05	1e-05	1e-05	1e-05	1e-05	1e-05	1e-05	1e-05	1e-05	1e-05	1e-05	0.0517204	1e-05	1e-05	1e-05	1e-05
ATP6V1B2	0.469083	0.526308	1.27394	0.931252	0.275455	1.14284	0.560061	0.318511	0.0551975	0.322285	1.06251	0.817999	0.0352526	0.436402	1.58714	0.495391	0.607532	0.732977	0.63249	1.69909	1.15853	0.160882	1.31764	1.69526	0.432584	1.20206	0.253043	1.24114	2.89884	0.265454	0.691125	0.688379	0.310017	0.532511	0.302143	8.47736	0.479603	0.561678	0.423821	0.390952	0.607	0.389863	7.27374	0.189345	4.59315	0.509478	0.0838588	0.153457	0.992656
ATP6V1C1	1e-05	0.0970466	1e-05	1e-05	1e-05	1e-05	1e-05	2.30513	1e-05	1e-05	1e-05	1e-05	1e-05	1e-05	0.635392	1e-05	1e-05	1e-05	1e-05	1e-05	1e-05	1e-05	1e-05	1e-05	1e-05	1e-05	1e-05	1e-05	1e-05	1e-05	1e-05	1e-05	1e-05	1e-05	1e-05	1e-05	1e-05	1e-05	1e-05	1e-05	1e-05	1e-05	1e-05	1e-05	1e-05	0.687943	1e-05	1e-05	1e-05
ATP6V1C2	1e-05	1e-05	1e-05	1e-05	1e-05	1e-05	1e-05	1e-05	1e-05	1e-05	1e-05	1e-05	1e-05	1e-05	1e-05	1e-05	1e-05	1e-05	1e-05	1e-05	1e-05	1e-05	1e-05	1e-05	1e-05	1e-05	1e-05	1e-05	1e-05	1e-05	1e-05	1e-05	1e-05	1e-05	1e-05	1e-05	1e-05	1e-05	1e-05	1e-05	1e-05	1e-05	1e-05	1e-05	1e-05	1e-05	1e-05	1e-05	1e-05
ATP6V1D	1e-05	1e-05	1e-05	1e-05	1e-05	1e-05	1e-05	1e-05	1e-05	1e-05	1e-05	1e-05	1e-05	1e-05	1e-05	1e-05	1e-05	1e-05	1e-05	1e-05	1e-05	1e-05	1e-05	1e-05	1e-05	1e-05	1e-05	1e-05	1e-05	1e-05	1e-05	1e-05	1e-05	1e-05	1e-05	1e-05	1e-05	1e-05	1e-05	1e-05	1e-05	1e-05	1e-05	1e-05	1e-05	1e-05	1e-05	1e-05	1e-05
ATP6V1E1	1e-05	1e-05	1e-05	1.9613	0.257001	1e-05	1e-05	1e-05	1e-05	1e-05	1e-05	1e-05	1e-05	1e-05	1e-05	1e-05	1e-05	1e-05	0.103055	1e-05	0.286414	1e-05	1e-05	1e-05	1e-05	1e-05	1e-05	1e-05	1e-05	1e-05	0.268749	1e-05	1e-05	1e-05	1e-05	0.272248	1e-05	1e-05	1e-05	0.228652	1e-05	1e-05	0.26961	0.139811	1e-05	1e-05	1e-05	1e-05	1e-05
ATP6V1E2	1e-05	1e-05	1e-05	1e-05	1e-05	1e-05	1e-05	1e-05	1e-05	1e-05	1e-05	1e-05	1e-05	1e-05	1e-05	1e-05	1e-05	1e-05	1e-05	1e-05	1e-05	1e-05	1e-05	1e-05	1e-05	1e-05	1e-05	1e-05	1e-05	1e-05	1e-05	1e-05	1e-05	1e-05	1e-05	1e-05	1e-05	1e-05	1e-05	1e-05	1e-05	1e-05	1e-05	1e-05	1e-05	1e-05	1e-05	1e-05	1e-05
ATP6V1F	1e-05	1e-05	10.4331	21.6465	1e-05	2.16872	6.35661	1e-05	1e-05	1e-05	1e-05	3.25499	1e-05	1.5185	1e-05	1e-05	1e-05	1e-05	2.50218	1e-05	1e-05	1e-05	8.50377	1e-05	1e-05	1e-05	1e-05	1e-05	6.49359	1e-05	1e-05	1e-05	1e-05	1e-05	1e-05	1e-05	1e-05	1e-05	10.8203	1.26257	1e-05	1e-05	1e-05	1e-05	5.86412	1e-05	1e-05	1e-05	1e-05
ATP6V1G1	1e-05	1e-05	1e-05	1e-05	1e-05	1e-05	1e-05	1e-05	1e-05	1e-05	1e-05	1e-05	1e-05	1e-05	1e-05	1e-05	1e-05	1e-05	1e-05	1e-05	1e-05	1e-05	1e-05	1e-05	1e-05	1e-05	1e-05	1e-05	1e-05	1e-05	1e-05	1e-05	1e-05	1e-05	1e-05	1e-05	1e-05	1e-05	1e-05	1e-05	1e-05	1e-05	1e-05	1e-05	1e-05	1e-05	1e-05	1e-05	1e-05
ATP6V1G2	1e-05	1e-05	1e-05	1e-05	1e-05	1e-05	1e-05	1e-05	1e-05	1e-05	1e-05	1e-05	1e-05	1e-05	1e-05	1e-05	1e-05	1e-05	1e-05	1e-05	5.14788	1e-05	1e-05	1e-05	9.3053	1e-05	1e-05	1e-05	1e-05	1e-05	1e-05	1e-05	1e-05	1e-05	1e-05	1e-05	1e-05	1e-05	1e-05	1e-05	1e-05	1e-05	1e-05	1e-05	1e-05	1e-05	1e-05	1e-05	1e-05
ATP6V1H	1e-05	1e-05	1e-05	1e-05	1e-05	1e-05	1e-05	1e-05	1e-05	1e-05	1e-05	1e-05	1e-05	0.0957515	1e-05	1e-05	1e-05	1e-05	1e-05	1e-05	1e-05	1e-05	1e-05	1e-05	0.0922109	1e-05	1e-05	1e-05	1e-05	1e-05	1e-05	1e-05	1e-05	1e-05	1e-05	1e-05	1e-05	1e-05	1e-05	0.551799	1e-05	1e-05	1e-05	1e-05	1e-05	1e-05	1e-05	1e-05	1e-05
ATP8	1e-05	1e-05	1e-05	1e-05	1e-05	1e-05	1e-05	1e-05	1e-05	1e-05	1e-05	1e-05	1e-05	1e-05	1e-05	1e-05	1e-05	1e-05	1e-05	1e-05	1e-05	1e-05	1e-05	1e-05	1e-05	1e-05	1e-05	1e-05	1e-05	1e-05	1e-05	1e-05	1e-05	1e-05	1e-05	1e-05	1e-05	1e-05	1e-05	1e-05	1e-05	1e-05	1e-05	1e-05	1e-05	1e-05	1e-05	1e-05	1e-05
ATP8A1	1e-05	1e-05	1e-05	1e-05	1e-05	1e-05	1e-05	1e-05	1e-05	1e-05	1e-05	1e-05	1e-05	1e-05	1e-05	1e-05	1e-05	1e-05	1e-05	1e-05	1e-05	1e-05	1e-05	1e-05	1e-05	1e-05	1e-05	1e-05	1e-05	1e-05	1e-05	1e-05	1e-05	1e-05	1e-05	1e-05	1e-05	1e-05	1e-05	1e-05	1e-05	1e-05	1e-05	1e-05	1e-05	1e-05	1e-05	1e-05	1e-05
ATP8A2	1e-05	1e-05	1e-05	1e-05	1e-05	1e-05	1e-05	1e-05	1e-05	1e-05	1e-05	1e-05	1e-05	1e-05	1e-05	1e-05	1e-05	1e-05	1e-05	1e-05	1e-05	1e-05	1e-05	1e-05	1e-05	1e-05	1e-05	1e-05	1e-05	1e-05	1e-05	1e-05	1e-05	1e-05	1e-05	1e-05	1e-05	1e-05	1e-05	1e-05	1e-05	1e-05	1e-05	1e-05	1e-05	1e-05	1e-05	1e-05	1e-05
ATP8B1	1e-05	1e-05	1e-05	1e-05	1e-05	1e-05	1e-05	1e-05	1e-05	1e-05	1e-05	1e-05	1e-05	1e-05	1e-05	1e-05	1e-05	1e-05	1e-05	1e-05	1e-05	1e-05	1e-05	1e-05	1e-05	1e-05	1e-05	1e-05	1e-05	1e-05	1e-05	1e-05	1e-05	1e-05	1e-05	1e-05	1e-05	0.079879	1e-05	1e-05	1e-05	1e-05	1e-05	1e-05	1e-05	1e-05	1e-05	1e-05	0.406325
ATP8B2	1e-05	1e-05	1e-05	1e-05	1e-05	1e-05	1e-05	1e-05	1e-05	1e-05	1e-05	1e-05	1e-05	1e-05	1e-05	1e-05	1e-05	1e-05	1e-05	1e-05	1e-05	1e-05	1e-05	1e-05	1e-05	1e-05	1e-05	1e-05	1e-05	1e-05	1e-05	1e-05	1e-05	1e-05	1e-05	1e-05	1e-05	1e-05	1e-05	1e-05	1e-05	1e-05	1e-05	1e-05	1e-05	1e-05	1e-05	1e-05	1e-05
ATP8B3	1e-05	1e-05	1e-05	1e-05	1e-05	1e-05	1e-05	1e-05	1e-05	1e-05	1e-05	1e-05	1e-05	1e-05	1e-05	1e-05	1e-05	1e-05	1e-05	1e-05	1e-05	1e-05	1e-05	1e-05	1e-05	1e-05	1e-05	1e-05	1e-05	1e-05	1e-05	1e-05	1e-05	1e-05	1e-05	1e-05	1e-05	1e-05	1e-05	1e-05	1e-05	1e-05	1e-05	1e-05	1e-05	1e-05	1e-05	1e-05	1e-05
ATP8B4	1e-05	1e-05	1e-05	1e-05	1e-05	1e-05	1e-05	1e-05	1e-05	1e-05	1e-05	1e-05	1e-05	1e-05	1e-05	1e-05	1e-05	1e-05	1e-05	1e-05	1e-05	1e-05	1e-05	1e-05	1e-05	1e-05	1e-05	1e-05	1e-05	1e-05	1e-05	1e-05	1e-05	1e-05	1e-05	1e-05	1e-05	1e-05	1e-05	1e-05	1e-05	1e-05	1e-05	1e-05	1e-05	1e-05	1e-05	1e-05	1e-05
ATP9A	1e-05	1e-05	1e-05	1e-05	1e-05	1e-05	1e-05	0.501841	1e-05	1e-05	0.935789	1e-05	1e-05	1e-05	1e-05	1e-05	1.1008	1e-05	1e-05	1e-05	1e-05	1e-05	1e-05	1e-05	0.48757	0.406478	0.0853155	1e-05	1e-05	1e-05	1e-05	0.246832	1e-05	1e-05	1e-05	1e-05	0.745721	1e-05	1e-05	1e-05	0.424559	1e-05	0.137096	0.474844	1e-05	1e-05	1e-05	1e-05	1e-05
ATP9B	1e-05	1e-05	1e-05	1e-05	1e-05	1e-05	1e-05	0.494	1e-05	1e-05	0.921167	1e-05	1e-05	1e-05	1e-05	1e-05	1.0836	1e-05	1e-05	1e-05	1e-05	1e-05	1e-05	1e-05	0.479952	0.400127	1e-05	1e-05	1e-05	1e-05	1e-05	0.242976	1e-05	1e-05	1e-05	1e-05	0.73407	1e-05	1e-05	1e-05	0.417925	1e-05	0.134954	0.467425	1e-05	1e-05	1e-05	1e-05	1e-05
ATPAF1	9.49143	2.54952	2.76675	20.6663	15.3706	2.66382	2.68614	2.46211	2.63341	1.90754	2.91754	2.77789	2.71377	0.371446	21.0646	2.61719	12.8185	2.79442	2.36278	3.35844	19.1599	16.9696	2.84351	2.27011	2.75609	2.42879	0.576817	4.46441	2.741	2.70796	2.73757	2.865	2.52944	2.42704	2.97561	2.51193	3.02486	2.71306	2.51576	2.7388	0.352756	0.301688	2.8486	0.577782	0.238255	2.91661	2.77519	2.62817	2.94865
ATPAF2	1e-05	1e-05	1e-05	1e-05	1e-05	1e-05	1e-05	1e-05	1e-05	1e-05	1e-05	1e-05	1e-05	1e-05	1e-05	1e-05	0.0591806	0.968188	1e-05	1e-05	1e-05	1e-05	1e-05	1e-05	1e-05	1e-05	1e-05	1e-05	1e-05	1e-05	1e-05	1e-05	1e-05	1e-05	1e-05	1e-05	1e-05	1e-05	1e-05	1e-05	1e-05	1e-05	1e-05	1e-05	1e-05	1e-05	0.282486	1e-05	1e-05
ATR	1e-05	1e-05	1e-05	1e-05	1e-05	1e-05	1e-05	1e-05	1e-05	1e-05	1e-05	1e-05	1e-05	1e-05	1e-05	1e-05	1e-05	1e-05	1e-05	1e-05	1e-05	1e-05	1e-05	1e-05	1e-05	0.196253	1e-05	1e-05	1e-05	1e-05	1e-05	1e-05	1e-05	1e-05	1e-05	1e-05	1e-05	1e-05	1e-05	1e-05	1e-05	1e-05	1e-05	1e-05	1e-05	1e-05	1e-05	1e-05	1e-05
ATRIP	1e-05	1e-05	1e-05	1e-05	1e-05	1e-05	1e-05	1e-05	1e-05	1e-05	1e-05	1e-05	1e-05	1e-05	1e-05	1e-05	1e-05	1e-05	1e-05	1e-05	1e-05	1e-05	1e-05	1e-05	1e-05	1e-05	1e-05	1e-05	1e-05	1e-05	1e-05	1e-05	1e-05	1e-05	1e-05	1e-05	1e-05	1e-05	1e-05	1e-05	1e-05	1e-05	1e-05	1e-05	1e-05	1e-05	1e-05	1e-05	1e-05
ATRN	3.38959	2.87011	4.6361	5.34395	4.07349	4.6085	4.703	3.31161	6.00196	2.46556	2.1599	2.98309	3.92086	2.46613	3.85535	5.46518	3.61402	4.32281	3.00844	2.20259	4.05739	3.77326	3.27234	2.87286	3.15125	2.58792	5.27333	4.5995	5.06191	3.89001	4.49429	4.17772	2.58372	3.93779	2.94593	3.25374	3.62443	5.67887	3.84588	3.1177	3.49392	4.16205	3.73438	3.19872	2.83132	3.00231	3.7754	5.16306	5.20904
ATRX	1e-05	1e-05	1e-05	1e-05	1e-05	1e-05	1e-05	1e-05	1e-05	1e-05	1e-05	1e-05	1e-05	1e-05	1e-05	1e-05	1e-05	1e-05	1e-05	1e-05	1e-05	1e-05	1e-05	1e-05	1e-05	1e-05	1e-05	1e-05	1e-05	1e-05	1e-05	1e-05	1e-05	1e-05	1e-05	1e-05	1e-05	0.0325756	1e-05	1e-05	1e-05	1e-05	1e-05	1e-05	1e-05	1e-05	1e-05	1e-05	1e-05
ATXN1	1e-05	1e-05	1e-05	1e-05	1e-05	1e-05	1e-05	1e-05	1e-05	1e-05	1e-05	1e-05	1e-05	1e-05	1e-05	1e-05	1e-05	1e-05	1e-05	1e-05	1e-05	1e-05	1e-05	1e-05	1e-05	1e-05	1e-05	1e-05	1e-05	1e-05	1e-05	1e-05	1e-05	1e-05	1e-05	1e-05	1e-05	1e-05	1e-05	1e-05	1e-05	1e-05	1e-05	1e-05	1e-05	1e-05	1e-05	1e-05	1e-05
ATXN10	3.36659	2.60914	2.03832	3.57437	3.19018	3.65045	2.11043	3.61969	4.39706	3.48978	3.62838	2.44226	5.06889	3.56305	4.42605	3.5002	2.01543	4.0622	3.13901	3.44928	3.9764	3.24391	3.22839	2.22355	3.06939	1.98263	2.54433	4.05457	4.76972	3.92787	2.56501	2.9748	2.76211	2.72075	2.81616	3.12419	3.80749	3.64795	2.47146	3.15506	3.08146	3.73572	4.29754	3.41715	3.45128	3.20168	3.82239	2.18283	3.92084
ATXN2	1e-05	1e-05	1e-05	1e-05	1e-05	1e-05	1e-05	1e-05	1e-05	1e-05	1e-05	1e-05	1e-05	1e-05	1e-05	1e-05	1e-05	1e-05	1e-05	1e-05	1e-05	1e-05	1e-05	1e-05	1e-05	1e-05	1e-05	1e-05	1e-05	1e-05	1e-05	1e-05	1e-05	1e-05	1e-05	1e-05	1e-05	1e-05	1e-05	1e-05	1e-05	1e-05	1e-05	1e-05	1e-05	1e-05	1e-05	1e-05	1e-05
ATXN2L	1e-05	1e-05	1e-05	1e-05	1e-05	1e-05	1e-05	1e-05	1e-05	1e-05	1e-05	1e-05	1e-05	1e-05	1e-05	1e-05	1e-05	1e-05	1e-05	1e-05	1e-05	1e-05	1e-05	1e-05	1e-05	1e-05	1e-05	1e-05	1e-05	1e-05	0.575902	1e-05	1e-05	1e-05	1e-05	1e-05	1e-05	1e-05	1e-05	0.0850996	1e-05	1e-05	1e-05	1e-05	1e-05	1e-05	1e-05	1e-05	1e-05
ATXN3	1e-05	1e-05	1e-05	1e-05	1e-05	1e-05	1e-05	1e-05	1e-05	1e-05	1e-05	1e-05	1e-05	1e-05	1e-05	1e-05	1e-05	1e-05	1e-05	1e-05	1e-05	1e-05	1e-05	1e-05	1e-05	1e-05	1e-05	1e-05	1e-05	1e-05	1e-05	1e-05	1e-05	1e-05	1e-05	1e-05	1e-05	1e-05	1e-05	1e-05	1.57227	1e-05	1e-05	1e-05	1e-05	1e-05	1e-05	1e-05	1e-05
ATXN7L3B	1e-05	1e-05	1e-05	1e-05	1e-05	1e-05	1e-05	1e-05	1e-05	1e-05	1e-05	1e-05	1e-05	1e-05	1e-05	1e-05	1e-05	1e-05	1e-05	1e-05	1e-05	1e-05	1e-05	1e-05	1e-05	1e-05	1e-05	1e-05	1e-05	1e-05	1e-05	1e-05	1e-05	1e-05	1e-05	1e-05	1e-05	1e-05	1e-05	1e-05	1e-05	1e-05	1e-05	1e-05	1e-05	1e-05	1e-05	1e-05	1e-05
AUH	1e-05	1e-05	1e-05	1e-05	1e-05	1e-05	1e-05	1e-05	1e-05	1e-05	1e-05	1e-05	1e-05	1e-05	1e-05	1e-05	1e-05	1e-05	1e-05	1e-05	1e-05	1e-05	1e-05	1e-05	1e-05	1e-05	1e-05	1e-05	1e-05	1e-05	1e-05	1e-05	1e-05	1e-05	1e-05	1e-05	1e-05	1e-05	1e-05	1e-05	1e-05	1e-05	1e-05	1e-05	1e-05	1e-05	1e-05	1e-05	1e-05
AUP1	1e-05	1e-05	1e-05	1e-05	1e-05	1e-05	1e-05	1e-05	1e-05	1e-05	1e-05	1e-05	1e-05	1e-05	1e-05	1e-05	0.719448	1e-05	1e-05	1e-05	1e-05	1e-05	1e-05	1e-05	1e-05	1e-05	1e-05	1e-05	1e-05	1e-05	1e-05	1e-05	1e-05	1e-05	1e-05	1e-05	1e-05	1e-05	1e-05	1e-05	1e-05	1e-05	1e-05	1e-05	1e-05	1e-05	1e-05	1e-05	1e-05
AURKA	1e-05	1e-05	1e-05	1e-05	1e-05	1e-05	1e-05	1e-05	1e-05	1e-05	1e-05	1e-05	1e-05	1e-05	1e-05	1e-05	1e-05	1e-05	1e-05	1e-05	1e-05	1e-05	1e-05	1e-05	1e-05	1e-05	1e-05	1e-05	1e-05	1e-05	1e-05	1e-05	1e-05	1e-05	1e-05	1e-05	1e-05	1e-05	1e-05	1e-05	1e-05	1e-05	1e-05	1e-05	1e-05	1e-05	1e-05	1e-05	1e-05
AURKB	1e-05	1e-05	1e-05	1e-05	1e-05	1e-05	1e-05	1e-05	0.0999697	0.135856	1e-05	1e-05	1e-05	1e-05	1e-05	1e-05	1e-05	1e-05	1e-05	1e-05	1e-05	1e-05	1e-05	1e-05	0.0852411	1e-05	1e-05	1e-05	1e-05	1e-05	1e-05	1e-05	1e-05	1e-05	0.0989876	0.11523	1e-05	1e-05	1e-05	1e-05	1e-05	1e-05	0.083998	1e-05	1e-05	1e-05	1e-05	1e-05	1e-05
AVEN	1e-05	1e-05	1e-05	1e-05	1e-05	1e-05	1e-05	1e-05	1e-05	1e-05	1e-05	1e-05	1e-05	1e-05	1e-05	1e-05	0.247763	1e-05	1e-05	1e-05	1e-05	1e-05	1e-05	1e-05	1e-05	1e-05	1e-05	1e-05	1e-05	1e-05	1e-05	1e-05	1e-05	1e-05	1e-05	1e-05	1e-05	1e-05	1e-05	1e-05	1e-05	1e-05	1e-05	1e-05	1e-05	1e-05	1e-05	1e-05	1e-05
AVIL	2.2596	2.54952	2.76675	0.0299024	2.58907	0.0241435	2.68614	2.46211	0.0289854	2.56695	0.0294786	2.77789	2.71377	2.55032	0.0245092	2.61719	2.88042	2.79442	2.58955	3.35844	2.81914	2.55642	2.84351	0.00719157	0.0325435	0.0185029	2.58847	2.65759	0.0175225	0.0173373	2.73757	2.865	2.52944	2.42704	0.0158096	2.51193	0.0101739	2.71306	0.0287525	0.0233175	2.39571	0.00686419	2.8486	2.36968	2.38399	0.0270154	2.77519	2.62817	2.94865
AVL9	1e-05	1e-05	1e-05	1e-05	1e-05	1e-05	1e-05	0.404697	1e-05	1e-05	0.272234	1e-05	1e-05	0.277726	1e-05	1e-05	1e-05	1e-05	1e-05	1e-05	1e-05	1e-05	1e-05	1e-05	1e-05	1e-05	1e-05	1e-05	1e-05	1e-05	1e-05	1e-05	1e-05	1e-05	1e-05	1e-05	1e-05	1e-05	1e-05	1e-05	1e-05	1e-05	1e-05	1e-05	1e-05	1e-05	1e-05	1e-05	1e-05
AXL	1e-05	1e-05	1e-05	1e-05	1e-05	1e-05	1e-05	1e-05	1e-05	1e-05	1e-05	1e-05	1e-05	1e-05	1e-05	1e-05	1e-05	1e-05	1e-05	1e-05	1e-05	1e-05	1e-05	1e-05	1e-05	1e-05	1e-05	1e-05	1e-05	0.138048	1e-05	1e-05	1e-05	1e-05	1e-05	1e-05	1e-05	1e-05	1e-05	1e-05	1e-05	1e-05	1e-05	1e-05	1e-05	1e-05	1e-05	1e-05	1e-05
AZGP1	47.4665	83.5858	99.4712	63.5749	25.1191	47.2446	26.3997	55.984	48.1732	33.7353	81.395	36.2362	86.5452	33.6774	66.0396	57.0773	66.4871	40.8896	57.8463	98.8966	50.2333	47.0684	25.3245	31.3716	86.0174	67.5669	26.3984	52.1716	50.2534	34.2493	54.3546	71.5396	41.3895	34.1741	67.681	35.7731	86.9559	64.1447	30.5844	43.6713	25.0333	43.7692	40.2302	60.9355	36.0126	33.4219	15.1415	55.0838	35.807
AZU1	1.29981	0.313111	1.00739	4.75551	1.56205	2.49964	2.52374	1.05837	5.18366	1.39746	3.87064	2.42581	0.388839	0.655232	1.69202	0.280127	0.507931	2.2207	0.384187	0.538405	0.493476	1.76694	2.38645	0.187547	0.275223	0.612506	1.07691	1.4104	1.32866	0.164771	0.325421	0.559191	1.43351	2.98389	7.79055	1.89729	2.20173	0.963874	0.771181	0.144235	4.32209	3.39352	3.37242	1.04703	0.299174	3.1789	2.04361	0.245659	1.3233
B2M	1.4319	7.04766	3.98467	7.62886	2.80033	1.70369	1.75235	0.604303	4.64694	0.839371	1.53448	8.06289	2.25399	0.609953	4.68519	1.78147	0.731505	1.95823	6.19909	3.67968	4.58877	2.03599	2.48541	3.76984	4.15873	1.47332	5.78989	3.37247	1.74579	5.79606	4.00583	4.06117	3.34318	2.47217	5.5028	3.23898	4.26328	4.6172	2.19865	19.2565	1.63459	3.58792	2.04946	6.16016	2.22236	5.70504	1.87963	0.655553	3.6914
B3GALT5	1e-05	1e-05	1e-05	1e-05	1e-05	1e-05	1e-05	1e-05	1e-05	1e-05	1e-05	1e-05	1e-05	1e-05	1e-05	1e-05	1e-05	1e-05	1e-05	1e-05	1e-05	1e-05	1e-05	1e-05	1e-05	1e-05	1e-05	1e-05	1e-05	1e-05	1e-05	1e-05	1e-05	1e-05	1e-05	1e-05	1e-05	1e-05	1e-05	1e-05	1e-05	1e-05	1e-05	1e-05	1e-05	1e-05	1e-05	1e-05	1e-05
B3GALT6	1e-05	1e-05	1e-05	1e-05	1e-05	1e-05	1e-05	1e-05	1e-05	1e-05	1e-05	1e-05	1e-05	1e-05	1e-05	1e-05	1e-05	1e-05	1e-05	1e-05	1e-05	1e-05	1e-05	1e-05	1e-05	1e-05	1e-05	1e-05	1e-05	1e-05	1e-05	1e-05	1e-05	1e-05	1e-05	1e-05	1e-05	1e-05	1e-05	1e-05	1e-05	1e-05	1e-05	1e-05	1e-05	1e-05	1e-05	1e-05	1.1213
B3GLCT	1e-05	0.424879	1e-05	1e-05	1e-05	1e-05	1e-05	1e-05	1e-05	1e-05	1e-05	1e-05	1e-05	1e-05	1e-05	1e-05	1e-05	1e-05	1e-05	2.24823	1.04734	1e-05	1e-05	1e-05	1e-05	1e-05	1e-05	1e-05	1e-05	1e-05	1e-05	1e-05	1e-05	1e-05	1e-05	1e-05	1e-05	1e-05	1e-05	1e-05	1e-05	1e-05	1e-05	1e-05	1e-05	1e-05	1e-05	1e-05	1e-05
B3GNT2	1e-05	0.231847	1e-05	1e-05	1e-05	1e-05	1e-05	0.216093	1e-05	0.11345	1e-05	1e-05	0.202409	1e-05	1e-05	1e-05	1e-05	1e-05	0.201438	1e-05	1e-05	1e-05	1e-05	1e-05	1e-05	1e-05	1e-05	1e-05	1e-05	0.201002	1e-05	1e-05	1e-05	1e-05	1e-05	1e-05	0.245904	1e-05	1e-05	1e-05	1e-05	0.293594	1e-05	1e-05	1e-05	1e-05	1e-05	1e-05	1e-05
B3GNT3	1e-05	0.0633284	1e-05	0.193757	1e-05	1e-05	1e-05	1e-05	1e-05	1e-05	1e-05	1e-05	1e-05	1e-05	1e-05	1e-05	1e-05	1e-05	1e-05	1e-05	1e-05	1e-05	1e-05	1e-05	1e-05	1e-05	1e-05	1e-05	1e-05	1e-05	1e-05	1e-05	1e-05	1e-05	1e-05	1e-05	1e-05	1e-05	1e-05	1e-05	1e-05	1e-05	1e-05	1e-05	0.211599	1e-05	1e-05	1e-05	1e-05
B3GNT6	1e-05	1e-05	1e-05	1e-05	1e-05	1e-05	1e-05	1e-05	1e-05	1e-05	1e-05	1e-05	1e-05	1e-05	1e-05	1e-05	1e-05	1e-05	1e-05	1e-05	1e-05	1e-05	1e-05	1.86181	1e-05	1e-05	1e-05	1e-05	1e-05	1e-05	1e-05	1e-05	1e-05	0.0895095	1e-05	1e-05	1e-05	1e-05	1e-05	1e-05	1e-05	1e-05	1e-05	1.28297	1e-05	1e-05	1.26996	1e-05	1e-05
B3GNT8	1e-05	1e-05	1e-05	1e-05	1e-05	0.0695108	1e-05	1e-05	1e-05	1e-05	1e-05	1e-05	0.165729	1e-05	1e-05	1e-05	1e-05	1e-05	1e-05	1e-05	1e-05	1e-05	1e-05	1e-05	1e-05	1.89987	1e-05	0.0867254	1e-05	0.0356696	1e-05	1e-05	1e-05	1e-05	1e-05	1e-05	1e-05	0.0638776	1e-05	0.0669385	1e-05	1e-05	1e-05	1e-05	1e-05	1e-05	1e-05	1e-05	1e-05
B4GALNT1	1e-05	1e-05	1e-05	1e-05	1e-05	1e-05	1e-05	1e-05	1e-05	1e-05	1e-05	1e-05	1e-05	1e-05	1e-05	1e-05	1e-05	0.0904532	1e-05	1e-05	1e-05	1e-05	1e-05	1e-05	1e-05	1e-05	1e-05	1e-05	1e-05	1e-05	1e-05	1e-05	1e-05	1e-05	1e-05	1e-05	1e-05	1e-05	1e-05	1e-05	1e-05	1e-05	1e-05	1e-05	1e-05	1e-05	1e-05	1e-05	1e-05
B4GALT1	1e-05	1e-05	1e-05	1e-05	1e-05	1e-05	1e-05	1e-05	1e-05	1e-05	1e-05	1e-05	1e-05	1e-05	1e-05	1e-05	1e-05	1e-05	1e-05	1e-05	4.7432	1e-05	1e-05	1e-05	1e-05	0.375035	1e-05	1e-05	1e-05	1e-05	1e-05	1e-05	1e-05	1e-05	1e-05	1e-05	1e-05	1e-05	1e-05	1e-05	1e-05	1e-05	1.26886	1e-05	1e-05	1e-05	1e-05	1e-05	1e-05
B4GALT3	1e-05	1e-05	1e-05	1e-05	1e-05	1e-05	1e-05	1e-05	1e-05	1e-05	1e-05	1e-05	1e-05	1e-05	1e-05	1e-05	1e-05	1e-05	1e-05	1e-05	1e-05	1e-05	1e-05	1e-05	1e-05	1e-05	1e-05	1e-05	1e-05	1e-05	1e-05	1e-05	1e-05	1e-05	1e-05	1e-05	1e-05	1e-05	1e-05	1e-05	1e-05	1e-05	1e-05	1e-05	1e-05	1e-05	1e-05	1e-05	1e-05
B4GALT4	1e-05	1e-05	1e-05	1e-05	1e-05	1e-05	1e-05	1e-05	1e-05	1e-05	1e-05	1e-05	1e-05	1e-05	1e-05	1e-05	1e-05	1e-05	1e-05	1e-05	1e-05	1e-05	1e-05	1e-05	1e-05	1e-05	1e-05	1e-05	1e-05	1e-05	1e-05	1e-05	1e-05	1e-05	1e-05	1e-05	1e-05	1e-05	1e-05	1e-05	1e-05	1e-05	1e-05	1e-05	1e-05	1e-05	1e-05	1e-05	1e-05
B4GALT5	1e-05	1e-05	1e-05	1e-05	1e-05	1e-05	1e-05	1e-05	1e-05	1e-05	1e-05	1e-05	1e-05	1e-05	1e-05	1e-05	1e-05	1e-05	1e-05	1e-05	1e-05	1e-05	1e-05	1e-05	1e-05	1e-05	1e-05	1e-05	1e-05	1e-05	1e-05	1e-05	1e-05	1e-05	1e-05	1e-05	1e-05	1e-05	1e-05	1e-05	1e-05	1e-05	1e-05	1e-05	1e-05	1e-05	1e-05	1e-05	1e-05
B4GAT1	1e-05	0.501966	0.158984	1e-05	1e-05	1e-05	1e-05	1e-05	1e-05	1e-05	1e-05	1.50009	0.2664	1e-05	1e-05	1e-05	1e-05	1e-05	1e-05	1e-05	1e-05	1e-05	1e-05	0.686624	0.535108	1e-05	1e-05	1e-05	0.791113	0.694216	1e-05	1e-05	1e-05	0.641241	0.705271	1e-05	1e-05	1e-05	1e-05	1e-05	0.348578	0.812284	1e-05	1.12848	0.383358	1e-05	1e-05	0.229273	1e-05
B9D1	1e-05	1e-05	1e-05	1e-05	1e-05	1e-05	1e-05	1e-05	1e-05	1e-05	1e-05	1e-05	1e-05	1e-05	1e-05	1e-05	1e-05	1e-05	1e-05	1e-05	1e-05	1e-05	1e-05	1e-05	1e-05	1e-05	1e-05	1e-05	1e-05	1e-05	1e-05	1e-05	1e-05	1e-05	1e-05	1e-05	1e-05	1e-05	1e-05	1e-05	1e-05	1e-05	1e-05	1e-05	1e-05	1e-05	1e-05	1e-05	1e-05
BAAT	1e-05	1e-05	1e-05	1e-05	1e-05	1e-05	1e-05	1e-05	1e-05	1e-05	1e-05	1e-05	1e-05	1e-05	1e-05	1e-05	1e-05	1e-05	1e-05	1e-05	1e-05	1e-05	1e-05	1e-05	1e-05	1e-05	1e-05	1e-05	1e-05	1e-05	1e-05	1e-05	1e-05	1e-05	1e-05	1e-05	1e-05	1e-05	1e-05	1e-05	1e-05	1e-05	1e-05	1e-05	1e-05	1e-05	1e-05	1e-05	1e-05
BABAM1	1e-05	1e-05	1e-05	1e-05	1e-05	1e-05	1e-05	1e-05	1e-05	1e-05	1e-05	1e-05	1e-05	1e-05	1e-05	1e-05	1e-05	1e-05	1e-05	1e-05	0.683719	1e-05	1e-05	1e-05	1e-05	1e-05	1e-05	1e-05	1e-05	1e-05	1e-05	1e-05	1e-05	1e-05	1e-05	1e-05	1e-05	1e-05	5.19177	1e-05	1e-05	1e-05	1e-05	1e-05	1e-05	1e-05	1e-05	1e-05	1e-05
BABAM2	1e-05	1e-05	1e-05	1e-05	1e-05	1e-05	1e-05	1e-05	1e-05	1e-05	1e-05	1e-05	1e-05	1e-05	1e-05	1e-05	1e-05	1e-05	1e-05	1e-05	1e-05	1e-05	1e-05	1e-05	1e-05	1e-05	1e-05	1e-05	1e-05	1e-05	1e-05	1e-05	1e-05	1e-05	1e-05	1e-05	1e-05	1e-05	1e-05	1e-05	1e-05	1e-05	1e-05	0.241139	1e-05	1e-05	1e-05	1e-05	1e-05
BAD	1e-05	1e-05	1e-05	1e-05	1e-05	1e-05	1e-05	1e-05	1e-05	1e-05	1e-05	1e-05	1e-05	1e-05	1e-05	1e-05	1e-05	1e-05	1e-05	1e-05	1e-05	1e-05	1e-05	1e-05	1e-05	1e-05	1e-05	1e-05	1e-05	1e-05	1e-05	1e-05	1e-05	1e-05	1e-05	1e-05	1e-05	1e-05	1e-05	1e-05	1e-05	1e-05	1e-05	1e-05	1e-05	1e-05	5.70966	1e-05	1e-05
BAG1	1e-05	1e-05	1e-05	1e-05	1e-05	1e-05	1e-05	1e-05	1e-05	1e-05	1e-05	1e-05	1e-05	1e-05	1e-05	1e-05	1e-05	1e-05	1e-05	1e-05	1e-05	1e-05	1e-05	1e-05	1e-05	1e-05	1e-05	1e-05	1e-05	1e-05	1e-05	1e-05	1e-05	0.00832832	1e-05	1e-05	1e-05	1e-05	1e-05	1e-05	1e-05	1e-05	1e-05	1e-05	1e-05	1e-05	1e-05	1e-05	1e-05
BAG2	1e-05	1e-05	1e-05	1e-05	15.6057	1e-05	1e-05	0.247374	1e-05	12.5963	1e-05	2.28032	1e-05	1e-05	1e-05	1e-05	1e-05	0.107151	1e-05	1e-05	1e-05	1e-05	1e-05	1e-05	0.238598	1e-05	1e-05	1e-05	1e-05	1e-05	12.5173	1e-05	1e-05	1e-05	1e-05	19.9904	1e-05	1e-05	1e-05	1e-05	1e-05	24.5105	1e-05	1e-05	1e-05	1e-05	1e-05	1e-05	1e-05
BAG3	1e-05	1e-05	1e-05	1e-05	1e-05	0.650121	1e-05	0.0138176	1e-05	1e-05	2.29429	1e-05	1e-05	1e-05	1e-05	1e-05	1e-05	1e-05	0.095531	1e-05	1e-05	1e-05	1e-05	1e-05	1e-05	1e-05	1e-05	1e-05	1e-05	1e-05	1e-05	1e-05	1e-05	1e-05	1e-05	1e-05	1e-05	1e-05	1e-05	1e-05	1e-05	1e-05	0.00994426	1e-05	0.253763	1e-05	1e-05	1e-05	1e-05
BAG5	1e-05	30.5322	0.285919	0.0956945	1e-05	1e-05	1e-05	1e-05	1e-05	1e-05	1e-05	1e-05	1e-05	1e-05	0.260399	1e-05	1e-05	1e-05	1e-05	1e-05	1e-05	1e-05	1e-05	1e-05	1e-05	1e-05	23.811	0.129251	1e-05	15.0051	1e-05	1e-05	1e-05	1e-05	1e-05	1e-05	1e-05	1e-05	1e-05	1e-05	1e-05	1e-05	0.22794	1e-05	1e-05	1e-05	1e-05	1e-05	1e-05
BAG6	1e-05	0.0361177	0.0217258	1e-05	1e-05	1e-05	0.128519	1e-05	1e-05	1e-05	1e-05	0.175931	1e-05	1e-05	1e-05	0.163348	1e-05	1e-05	1e-05	1e-05	1e-05	1e-05	1e-05	1e-05	1e-05	0.226307	1e-05	1e-05	1e-05	1e-05	1e-05	1e-05	1e-05	0.652013	1e-05	1e-05	1e-05	1e-05	1e-05	0.0791083	1e-05	1e-05	1e-05	1e-05	1e-05	0.101314	1e-05	1e-05	1e-05
BAIAP2	1e-05	1e-05	0.295326	1e-05	1e-05	1e-05	1e-05	1e-05	1e-05	1e-05	1e-05	0.73748	1e-05	0.110196	1e-05	1e-05	1e-05	0.238511	1e-05	11.4244	1e-05	1e-05	1e-05	1e-05	1e-05	1e-05	1e-05	1e-05	1e-05	1e-05	7.41196	1e-05	0.250333	1e-05	1e-05	0.270595	1e-05	1e-05	1e-05	1e-05	1e-05	1e-05	1e-05	1e-05	1e-05	1e-05	1e-05	1e-05	1e-05
BAIAP2L1	1e-05	1e-05	1e-05	1e-05	1e-05	1e-05	1e-05	1e-05	1e-05	1e-05	0.274564	1e-05	1e-05	1e-05	1e-05	1e-05	1e-05	1e-05	1e-05	1e-05	1e-05	0.218373	0.0486959	0.88668	1e-05	1e-05	0.61103	1e-05	1e-05	1e-05	0.41634	1e-05	1e-05	1e-05	1e-05	1e-05	1e-05	1e-05	1e-05	0.324775	1e-05	1e-05	1e-05	1e-05	1e-05	1e-05	0.827211	1e-05	1e-05
BAK1	1e-05	2.44411	1e-05	1e-05	1e-05	1e-05	1e-05	1e-05	1e-05	1e-05	1e-05	1e-05	1e-05	1e-05	1e-05	1e-05	1e-05	1e-05	1e-05	1e-05	1e-05	1e-05	1e-05	1e-05	1e-05	1e-05	1e-05	1e-05	1e-05	1e-05	1e-05	1e-05	1e-05	1e-05	1e-05	1e-05	1e-05	1e-05	1e-05	1e-05	1e-05	1e-05	1e-05	1e-05	1e-05	1e-05	1e-05	1e-05	1e-05
BANF1	1e-05	1e-05	1e-05	1e-05	1e-05	1e-05	1e-05	1e-05	7.26937	1e-05	1e-05	1e-05	1e-05	1e-05	1e-05	1e-05	8.60014	12.7965	1e-05	1e-05	1e-05	1e-05	1e-05	1e-05	8.3869	1e-05	4.38125	1e-05	1e-05	1e-05	1e-05	1e-05	1e-05	7.60882	1e-05	1e-05	1e-05	1e-05	13.3134	1e-05	1e-05	1e-05	1e-05	1e-05	1e-05	2.12102	1e-05	1e-05	1e-05
BANP	1e-05	1e-05	1e-05	1e-05	1e-05	1e-05	1e-05	1.11038	1e-05	1e-05	1e-05	1e-05	1e-05	1e-05	1e-05	1e-05	4.75586	1e-05	1e-05	1e-05	1e-05	1e-05	1e-05	1e-05	1e-05	1e-05	1e-05	1e-05	1e-05	1e-05	1e-05	1e-05	1e-05	1e-05	1e-05	1e-05	1e-05	1e-05	1e-05	1e-05	1e-05	1e-05	1e-05	1e-05	1e-05	1e-05	1e-05	1e-05	1e-05
BASP1	1e-05	1e-05	1e-05	1e-05	1e-05	0.054511	1e-05	1e-05	1e-05	1e-05	1e-05	1e-05	1e-05	1e-05	1e-05	1e-05	1e-05	1e-05	1e-05	1e-05	1e-05	1e-05	1e-05	1e-05	1e-05	1e-05	1e-05	1e-05	1e-05	1e-05	1e-05	1e-05	1e-05	1e-05	1e-05	0.0466259	1e-05	1e-05	1e-05	1e-05	1e-05	1e-05	1e-05	1e-05	1e-05	1e-05	1e-05	1e-05	1e-05
BAX	1e-05	1e-05	1e-05	1e-05	1e-05	1e-05	1e-05	1e-05	1e-05	1e-05	1e-05	1e-05	1e-05	1e-05	1e-05	1e-05	1e-05	1e-05	0.376286	1e-05	1e-05	1e-05	1e-05	1e-05	1e-05	0.157718	1e-05	1e-05	1e-05	1e-05	1e-05	1e-05	0.287081	1e-05	1e-05	1e-05	1e-05	1e-05	1e-05	1e-05	1e-05	1e-05	1e-05	1e-05	1e-05	1e-05	1e-05	1e-05	1e-05
BAZ1A	1e-05	1e-05	1e-05	1e-05	1e-05	1e-05	1e-05	1e-05	1e-05	1e-05	1e-05	1e-05	1e-05	1e-05	1e-05	1e-05	1e-05	1e-05	1e-05	1e-05	1e-05	1e-05	1e-05	1e-05	1e-05	1e-05	1e-05	1e-05	1e-05	1e-05	1e-05	1e-05	1e-05	1e-05	1e-05	1e-05	1e-05	1e-05	1e-05	1e-05	1e-05	1e-05	1e-05	1e-05	1e-05	1e-05	0.0658823	1e-05	1e-05
BAZ1B	1e-05	1e-05	1e-05	1e-05	1e-05	1e-05	1e-05	1e-05	1e-05	1e-05	1e-05	1e-05	1e-05	1e-05	1e-05	1e-05	1e-05	0.0608335	1e-05	1e-05	0.109542	1e-05	1e-05	1e-05	1e-05	1e-05	1e-05	1e-05	1e-05	1e-05	1e-05	1e-05	1e-05	1e-05	1e-05	1e-05	1e-05	1e-05	1e-05	1e-05	1e-05	1e-05	1e-05	1e-05	1e-05	1e-05	1e-05	1e-05	1e-05
BAZ2A	1e-05	1e-05	1e-05	1e-05	1e-05	1e-05	1e-05	1e-05	1e-05	1e-05	1e-05	1e-05	1e-05	1e-05	1e-05	1e-05	1e-05	1e-05	1e-05	1e-05	1e-05	1e-05	1e-05	1e-05	1e-05	1e-05	1e-05	1e-05	1e-05	1e-05	1e-05	1e-05	0.0371066	1e-05	1e-05	1e-05	1e-05	1e-05	1e-05	1e-05	1e-05	1e-05	1e-05	1e-05	1e-05	1e-05	1e-05	1e-05	1e-05
BBOX1	23.9365	2.54952	2.76675	2.65573	2.58907	2.66382	50.78	45.2299	2.63341	24.0068	2.91754	2.77789	2.71377	2.55032	63.4536	2.61719	2.88042	2.79442	45.9982	3.35844	2.81914	2.55642	33.9827	40.7139	47.6271	54.9997	2.58847	2.65759	42.9767	2.70796	31.5529	63.1217	2.52944	2.42704	2.97561	3.04962	89.8863	60.5374	2.51576	2.7388	37.1229	2.62712	0.289578	2.36968	25.4907	28.5098	2.77519	2.62817	2.94865
BBS1	1e-05	1e-05	1e-05	1e-05	1e-05	1e-05	1e-05	1e-05	1e-05	1e-05	1e-05	1e-05	1e-05	1e-05	1e-05	1e-05	1e-05	1e-05	1e-05	1e-05	1e-05	1e-05	1e-05	1e-05	1e-05	1e-05	1e-05	1e-05	1e-05	1e-05	1e-05	1e-05	1e-05	1e-05	1e-05	1e-05	1e-05	1e-05	1e-05	1e-05	1e-05	1e-05	1e-05	1e-05	1e-05	1e-05	1e-05	1e-05	1e-05
BBS2	1e-05	1e-05	1e-05	1e-05	1e-05	1e-05	1e-05	1e-05	1e-05	1e-05	1e-05	1e-05	1e-05	1e-05	1e-05	1e-05	1e-05	0.132141	1e-05	1e-05	1e-05	1e-05	1e-05	1e-05	1e-05	1e-05	1e-05	1e-05	1e-05	1e-05	1e-05	1e-05	1e-05	1e-05	1e-05	1e-05	1e-05	1e-05	1e-05	1e-05	1e-05	1e-05	1e-05	1e-05	1e-05	1e-05	1e-05	1e-05	1e-05
BBS7	1e-05	1e-05	1e-05	1e-05	1e-05	1e-05	1e-05	1e-05	1e-05	1e-05	1e-05	1e-05	1e-05	1e-05	1e-05	1e-05	1e-05	1e-05	1e-05	1e-05	1e-05	1e-05	1e-05	1e-05	1e-05	1e-05	1e-05	1e-05	1e-05	1e-05	1e-05	1e-05	1e-05	1e-05	1e-05	1e-05	1e-05	0.0767305	1e-05	1e-05	1e-05	1e-05	1e-05	1e-05	1e-05	1e-05	1e-05	1e-05	1e-05
BBX	1e-05	1e-05	1e-05	1e-05	1e-05	1e-05	1e-05	1e-05	1e-05	1e-05	1e-05	1e-05	1e-05	1e-05	1e-05	1e-05	1e-05	1e-05	1e-05	1e-05	1e-05	1e-05	1e-05	1e-05	1e-05	1e-05	1e-05	1e-05	1e-05	1e-05	1e-05	1e-05	1e-05	1e-05	1e-05	1e-05	1e-05	1e-05	1e-05	1e-05	1e-05	1e-05	1e-05	1e-05	1e-05	1e-05	1e-05	1e-05	1e-05
BCAM	1e-05	1e-05	1e-05	1e-05	1e-05	1e-05	1e-05	1e-05	1e-05	1e-05	1e-05	1e-05	0.044319	0.187613	1e-05	0.123332	1e-05	1e-05	1e-05	6.2791	0.0247566	1e-05	1e-05	1e-05	1e-05	1e-05	1e-05	1e-05	1e-05	1e-05	1e-05	1e-05	1e-05	1e-05	1e-05	1e-05	1e-05	1e-05	1e-05	0.0308258	1e-05	1e-05	1e-05	1e-05	1e-05	1e-05	1e-05	1e-05	1e-05
BCAN	2.2596	2.54952	2.76675	2.65573	2.58907	0.200637	2.68614	0.169341	0.672884	2.56695	0.603809	2.77789	0.586315	2.55032	0.0662843	2.06395	2.88042	2.79442	2.58955	3.35844	2.81914	2.55642	2.84351	2.27011	2.75609	2.42879	2.58847	0.511861	2.741	2.70796	2.73757	2.865	0.355967	1.19162	2.97561	2.51193	3.02486	2.71306	2.51576	3.09313	2.39571	2.62712	0.826706	0.946939	2.43921	2.91661	0.468305	2.62817	0.824062
BCAP29	1e-05	1e-05	1e-05	1e-05	1e-05	1e-05	1e-05	1e-05	1e-05	1e-05	1e-05	1e-05	1e-05	0.858836	1e-05	1e-05	1e-05	1e-05	1e-05	1e-05	1e-05	1e-05	1e-05	1e-05	1e-05	1e-05	1e-05	1e-05	1e-05	1e-05	1e-05	1e-05	1e-05	1e-05	1e-05	1e-05	1e-05	1e-05	1e-05	1e-05	1e-05	1e-05	1e-05	1e-05	1e-05	1e-05	1e-05	1e-05	1e-05
BCAP31	3.21372	8.74795	3.29787	5.23149	3.87685	1.0966	0.726717	0.458412	4.84887	1.54129	5.85797	1.68533	9.26431	6.9171	6.30937	23.2093	6.11577	7.48715	3.78494	2.18098	7.3958	1.08697	1.87525	4.64969	12.8599	3.76698	13.7196	5.07287	9.03415	19.1475	7.32562	13.6264	1.38348	5.38678	2.17131	3.89953	4.59021	6.35697	9.7018	12.0996	1.49614	1.1974	1.58589	3.7165	4.15284	2.73847	4.08342	3.94739	16.9598
BCAR1	0.0617204	1e-05	1e-05	1e-05	1e-05	1e-05	1e-05	1e-05	0.184526	1e-05	1e-05	1e-05	1e-05	1e-05	1e-05	1e-05	1e-05	0.109614	0.463285	1e-05	0.0782157	1e-05	0.0821271	1e-05	1e-05	1e-05	1e-05	1e-05	1e-05	1e-05	1e-05	1e-05	1e-05	1e-05	1e-05	0.695414	0.389434	0.0593388	1e-05	1e-05	1e-05	1e-05	1e-05	1e-05	0.0663515	1e-05	1e-05	1e-05	1e-05
BCAS1	1e-05	1e-05	1e-05	1e-05	1e-05	1e-05	1e-05	1e-05	1e-05	1e-05	1e-05	1e-05	1e-05	1e-05	1e-05	1e-05	1e-05	1e-05	1e-05	1e-05	1e-05	1e-05	1e-05	1e-05	0.141569	1e-05	1e-05	1e-05	1e-05	1e-05	0.0792343	1e-05	1e-05	1e-05	1e-05	1e-05	1e-05	1e-05	1e-05	1e-05	1e-05	1e-05	1e-05	1e-05	1e-05	1e-05	1e-05	1e-05	1e-05
BCAS2	1e-05	1e-05	1e-05	1e-05	1e-05	1e-05	1e-05	1e-05	1e-05	1e-05	1e-05	1e-05	1e-05	1e-05	1e-05	1e-05	1e-05	1e-05	0.0609326	1e-05	1e-05	1e-05	1e-05	0.370442	1e-05	1e-05	0.163251	1e-05	1e-05	1e-05	1e-05	1e-05	1e-05	1e-05	1e-05	1e-05	1e-05	1e-05	1e-05	1e-05	1e-05	1e-05	1e-05	1e-05	1e-05	1e-05	1e-05	1e-05	1e-05
BCAS3	1e-05	1e-05	1e-05	1e-05	1e-05	1e-05	1e-05	1e-05	1e-05	1e-05	1e-05	1e-05	0.0577188	1e-05	1e-05	1e-05	1e-05	1e-05	1e-05	1e-05	1e-05	1e-05	1e-05	1e-05	1e-05	1e-05	1e-05	1e-05	1e-05	1e-05	1e-05	1e-05	1e-05	1e-05	1e-05	1e-05	1e-05	1e-05	1e-05	1e-05	1e-05	1e-05	1e-05	1e-05	1e-05	1e-05	1e-05	1e-05	1e-05
BCAT1	1e-05	1e-05	1e-05	1e-05	1e-05	1e-05	1e-05	1e-05	1e-05	1e-05	1e-05	1e-05	1e-05	1e-05	1e-05	1e-05	1e-05	1e-05	1e-05	1e-05	1e-05	1e-05	1e-05	1e-05	1e-05	1e-05	1e-05	1e-05	1e-05	1e-05	1e-05	1e-05	0.107234	1e-05	1e-05	1e-05	1e-05	1e-05	1e-05	1e-05	1e-05	1e-05	1e-05	1e-05	1e-05	1e-05	1e-05	1e-05	1e-05
BCAT2	1e-05	1e-05	1e-05	1e-05	1e-05	1e-05	1.00548	1e-05	1e-05	1e-05	0.105934	0.497968	1e-05	1e-05	1e-05	1e-05	1e-05	1e-05	1e-05	1e-05	6.19405	1.0907	1e-05	1e-05	0.672957	1e-05	1e-05	1e-05	1e-05	1e-05	1e-05	1e-05	1e-05	0.893389	1e-05	1.2773	1e-05	1e-05	1e-05	1e-05	1e-05	1e-05	1e-05	1e-05	0.522119	1e-05	1e-05	1.25096	1e-05
BCCIP	1e-05	1e-05	1e-05	1e-05	1e-05	1e-05	1e-05	1e-05	1e-05	1e-05	1e-05	1e-05	1e-05	1e-05	1e-05	1e-05	1e-05	1e-05	1e-05	1e-05	1e-05	1e-05	1e-05	1e-05	1e-05	1e-05	1e-05	1e-05	1e-05	1e-05	1e-05	1e-05	1e-05	1e-05	1e-05	1e-05	1e-05	1e-05	1.55076	1e-05	1e-05	1e-05	1e-05	1e-05	1e-05	1e-05	1e-05	1e-05	1e-05
BCHE	3.69865	18.9071	6.16774	21.3323	13.3081	4.73041	3.78009	2.88429	11.4076	3.43976	4.01622	4.81247	3.89494	5.62013	4.30484	6.1518	3.90968	4.96474	4.73663	3.80742	16.6837	8.84342	9.11881	5.23005	15.0467	4.35113	3.39057	5.01852	17.677	20.4183	5.67471	4.20109	3.96654	13.9285	5.52183	3.01508	3.12116	5.66951	4.97306	19.5769	10.5648	5.80815	15.4937	9.10211	9.5486	12.1419	3.92824	6.16626	6.40305
BCKDHA	1e-05	1e-05	1e-05	1e-05	1e-05	1e-05	1e-05	1e-05	1e-05	1e-05	1e-05	1e-05	1e-05	1e-05	1e-05	1e-05	1e-05	1e-05	1e-05	1e-05	1e-05	1e-05	1e-05	1e-05	1e-05	1e-05	1e-05	1e-05	1e-05	1e-05	1e-05	1e-05	1e-05	1e-05	1e-05	1e-05	1e-05	0.0248405	1e-05	1e-05	0.0129948	1e-05	1e-05	1e-05	1e-05	1e-05	1e-05	1e-05	1e-05
BCKDHB	2.2596	2.80796	2.76675	0.539665	2.58907	2.66382	0.568877	2.46211	0.916018	2.56695	2.91754	1.7952	1.85739	4.03124	2.19566	2.61719	2.88042	2.79442	2.58955	0.135622	2.81914	0.888739	0.629671	2.27011	0.218334	2.42879	2.58847	2.65759	2.741	2.70796	6.20544	2.865	2.52944	2.42704	1.62274	2.78964	3.02486	1.54539	1.13363	2.7388	2.39571	2.62712	2.8486	7.69784	2.38399	2.91661	2.77519	2.62817	2.94865
BCKDK	1e-05	1e-05	1e-05	1e-05	0.36521	1e-05	1e-05	1e-05	1e-05	1e-05	1e-05	1e-05	1e-05	1e-05	1e-05	1e-05	1e-05	1e-05	1e-05	1e-05	1e-05	1e-05	1e-05	0.604561	1e-05	0.494353	1e-05	1e-05	1e-05	1e-05	1e-05	1e-05	1e-05	1e-05	0.541114	1e-05	1e-05	1e-05	1e-05	1e-05	1e-05	1e-05	2.72403	1e-05	1e-05	1e-05	1e-05	1e-05	1e-05
BCL10	1e-05	1e-05	1e-05	1e-05	1e-05	1e-05	1e-05	1e-05	1e-05	1e-05	1e-05	1e-05	1e-05	1e-05	1e-05	1e-05	1e-05	1e-05	1e-05	1e-05	1e-05	1e-05	2.0313	1e-05	1e-05	1e-05	1e-05	1e-05	1e-05	1e-05	2.41559	1e-05	1e-05	1e-05	1e-05	1e-05	1e-05	1e-05	1e-05	1e-05	1e-05	1e-05	1e-05	1e-05	1e-05	1e-05	1e-05	1e-05	1e-05
BCL11A	1e-05	1e-05	1e-05	1e-05	1e-05	1e-05	1e-05	1e-05	1e-05	1e-05	1e-05	1e-05	1e-05	1e-05	1e-05	1e-05	1e-05	1e-05	1e-05	1e-05	1e-05	1e-05	1e-05	1e-05	1e-05	1e-05	1e-05	1e-05	1e-05	1e-05	1e-05	1e-05	1e-05	1e-05	1e-05	1e-05	1e-05	1e-05	1e-05	1e-05	1e-05	1e-05	1e-05	1e-05	1e-05	1e-05	1e-05	1e-05	1e-05
BCL2	1e-05	1e-05	1e-05	1e-05	1e-05	1e-05	1e-05	1e-05	1e-05	1e-05	1e-05	1e-05	1e-05	1e-05	1e-05	1e-05	1e-05	1e-05	1e-05	1e-05	1e-05	1e-05	1e-05	1e-05	1e-05	1e-05	1e-05	1e-05	1e-05	1e-05	1e-05	1e-05	0.190777	1e-05	1e-05	1e-05	1e-05	1e-05	1e-05	1e-05	1e-05	1e-05	1e-05	1e-05	1e-05	1e-05	1e-05	1e-05	1e-05
BCL2L1	1e-05	1e-05	1e-05	1e-05	1e-05	1e-05	1e-05	1e-05	5.88349	1e-05	6.14791	1e-05	1e-05	1e-05	1e-05	1e-05	1e-05	1e-05	1e-05	1e-05	1e-05	1e-05	1e-05	1e-05	1e-05	1e-05	1e-05	1e-05	1e-05	1e-05	1e-05	1e-05	1e-05	1e-05	1e-05	1e-05	1e-05	6.31869	1e-05	1e-05	1e-05	1e-05	1e-05	1e-05	1e-05	1e-05	1e-05	1e-05	1e-05
BCL2L11	1e-05	1e-05	1e-05	1e-05	1e-05	1e-05	1e-05	1.00933	1e-05	1e-05	1e-05	1e-05	1e-05	1e-05	1e-05	1e-05	1e-05	1e-05	1e-05	1e-05	1e-05	1e-05	1e-05	1e-05	1e-05	1e-05	1e-05	1e-05	1e-05	1e-05	1e-05	1e-05	1e-05	1e-05	1e-05	1e-05	1e-05	1e-05	1e-05	1e-05	1e-05	1e-05	1e-05	1e-05	1e-05	1e-05	1e-05	1e-05	1e-05
BCL2L13	1e-05	1e-05	1e-05	1e-05	0.394071	1e-05	1e-05	1e-05	1.3127	1e-05	8.88134	1e-05	1e-05	1e-05	1e-05	1e-05	1e-05	1e-05	1e-05	1e-05	1e-05	1e-05	0.0818361	1e-05	1.6571	1e-05	1e-05	1e-05	1e-05	1e-05	1e-05	0.768247	1e-05	1e-05	1e-05	1e-05	1e-05	1e-05	1e-05	1e-05	1e-05	1e-05	1e-05	1e-05	1e-05	1e-05	1e-05	3.83555	1e-05
BCL2L14	1e-05	1e-05	1e-05	1e-05	1e-05	1e-05	1e-05	1e-05	1e-05	1e-05	1e-05	1e-05	1e-05	1e-05	1e-05	1e-05	1e-05	1e-05	1e-05	1e-05	1e-05	1e-05	1e-05	1e-05	1e-05	1e-05	1e-05	1e-05	1e-05	1e-05	1e-05	1e-05	1e-05	1e-05	1e-05	1e-05	1e-05	1e-05	1e-05	1e-05	1e-05	1e-05	1e-05	1e-05	1e-05	1e-05	1e-05	4.0034	1e-05
BCL2L15	8.00899	2.51454	11.5367	10.7671	5.72194	8.8146	10.8508	8.16016	9.41084	9.0765	17.3315	17.19	13.986	7.13892	10.8167	7.55839	14.0808	27.1065	11.2105	26.2528	8.57427	7.479	7.85688	5.00703	4.16807	6.66002	4.90769	12.2541	11.1534	8.21629	9.57371	12.9325	6.52901	6.34043	15.9357	8.38491	17.7409	7.11298	6.16621	7.50387	10.7615	13.0801	7.32539	8.10562	8.2691	9.88041	3.05029	16.5411	6.05518
BCL2L2	1e-05	1e-05	1e-05	1e-05	1e-05	1e-05	1e-05	1e-05	1e-05	1e-05	0.201423	1e-05	1e-05	1e-05	1e-05	1e-05	1e-05	1e-05	1e-05	1e-05	1e-05	1e-05	1e-05	1e-05	1e-05	1e-05	1e-05	1e-05	1e-05	1e-05	1e-05	1e-05	1e-05	1e-05	1e-05	1e-05	1e-05	1e-05	1e-05	1e-05	1e-05	1e-05	1e-05	1e-05	1e-05	1e-05	1e-05	1e-05	1e-05
BCL7A	0.161707	1e-05	1e-05	1e-05	1e-05	1e-05	1e-05	1e-05	1e-05	1e-05	1e-05	1e-05	1e-05	1e-05	1e-05	1e-05	1e-05	1e-05	1e-05	1e-05	1e-05	1e-05	1e-05	1e-05	1e-05	1e-05	1e-05	1e-05	1e-05	1e-05	1e-05	1e-05	1e-05	1e-05	1e-05	1e-05	1e-05	1e-05	1e-05	1e-05	1e-05	1e-05	1e-05	1e-05	1e-05	1e-05	1e-05	1e-05	1e-05
BCL7B	0.161707	1e-05	1e-05	1e-05	1e-05	1e-05	1e-05	1e-05	1e-05	1e-05	1e-05	1e-05	1e-05	1e-05	1e-05	1e-05	1e-05	1e-05	1e-05	1e-05	1e-05	1e-05	1e-05	1e-05	1e-05	1e-05	1e-05	1e-05	1e-05	1e-05	1e-05	1e-05	1e-05	1e-05	1e-05	1e-05	1e-05	1e-05	1e-05	1e-05	1e-05	1e-05	1e-05	1e-05	1e-05	1e-05	1e-05	1e-05	1e-05
BCL7C	0.161707	1e-05	1e-05	1e-05	1e-05	1e-05	1e-05	1e-05	1e-05	1e-05	1e-05	1e-05	0.111312	1e-05	1e-05	1e-05	1e-05	1e-05	1e-05	1e-05	1e-05	1e-05	1e-05	1e-05	1e-05	1e-05	1e-05	1e-05	1e-05	1e-05	1e-05	1e-05	1e-05	1e-05	1e-05	1e-05	1e-05	1e-05	1e-05	1e-05	1e-05	1e-05	1e-05	1e-05	1e-05	1e-05	1e-05	1e-05	1e-05
BCL9L	1e-05	1e-05	1e-05	1e-05	1e-05	1e-05	1e-05	1e-05	1e-05	1e-05	1e-05	1e-05	1e-05	1e-05	1e-05	1e-05	1e-05	1e-05	1e-05	1e-05	1e-05	1e-05	1e-05	1e-05	1e-05	1e-05	1e-05	1e-05	1e-05	1e-05	1e-05	1e-05	1e-05	1e-05	1e-05	1e-05	1e-05	1e-05	1e-05	1e-05	1e-05	1e-05	1e-05	1e-05	1e-05	1e-05	1e-05	1e-05	1e-05
BCLAF1	1e-05	1e-05	1e-05	1e-05	1e-05	1e-05	0.116673	1e-05	1e-05	1e-05	1e-05	1e-05	1e-05	1e-05	0.775764	1e-05	1e-05	1e-05	1e-05	1e-05	1e-05	1e-05	1e-05	1e-05	1e-05	1e-05	1e-05	1e-05	1e-05	1e-05	1e-05	1e-05	1e-05	1e-05	1e-05	1e-05	1e-05	1e-05	1e-05	1e-05	1e-05	1e-05	1e-05	1e-05	1e-05	1e-05	1e-05	1e-05	1e-05
BCR	1e-05	1e-05	1e-05	1e-05	1e-05	1e-05	1e-05	1e-05	1e-05	1e-05	1e-05	1e-05	1e-05	1e-05	1e-05	1e-05	1e-05	1e-05	1e-05	0.716096	1e-05	1e-05	1e-05	1e-05	1e-05	1e-05	1e-05	1e-05	1e-05	1e-05	1e-05	1e-05	1e-05	1e-05	1e-05	1e-05	1e-05	1e-05	1e-05	1e-05	1e-05	1e-05	1e-05	1e-05	1e-05	1e-05	1e-05	1e-05	1e-05
BCS1L	1e-05	1e-05	1e-05	1e-05	1e-05	1e-05	0.0475393	1e-05	1e-05	1e-05	0.234389	1e-05	1e-05	1e-05	1e-05	1e-05	1e-05	1e-05	1e-05	1e-05	1e-05	1e-05	1e-05	1e-05	1e-05	1e-05	0.0201116	1e-05	1e-05	1e-05	1e-05	1e-05	1e-05	1e-05	1e-05	1e-05	1e-05	1e-05	1e-05	1e-05	1e-05	1e-05	1e-05	1e-05	1e-05	1e-05	0.0444806	1e-05	0.0429193
BDH1	0.506099	1e-05	0.0751687	1e-05	1e-05	1.43863	1e-05	0.0677494	1e-05	1e-05	1e-05	1e-05	1e-05	1e-05	1e-05	1e-05	1e-05	1e-05	1e-05	1e-05	1e-05	0.63107	1e-05	1e-05	1e-05	1e-05	0.0553878	1e-05	1e-05	1e-05	1e-05	1.03813	1e-05	0.207483	1e-05	1e-05	1e-05	1e-05	1e-05	0.20614	1e-05	1e-05	1e-05	1e-05	1e-05	1e-05	1e-05	1e-05	1e-05
BDH2	1e-05	1e-05	1e-05	1e-05	1e-05	1.06928	1e-05	1e-05	1e-05	0.223591	1e-05	1e-05	1e-05	1e-05	1e-05	1e-05	1e-05	1e-05	1e-05	1e-05	1e-05	1e-05	1e-05	1e-05	1e-05	0.173173	1e-05	1e-05	1e-05	1e-05	1e-05	1e-05	1e-05	1e-05	1e-05	1e-05	1e-05	1e-05	1e-05	1e-05	1e-05	1e-05	1e-05	1e-05	1e-05	1e-05	1e-05	1e-05	0.450285
BECN1	1e-05	1e-05	1e-05	1e-05	1e-05	1e-05	1e-05	1e-05	1e-05	1e-05	1e-05	1e-05	1e-05	1e-05	1e-05	1e-05	1e-05	1e-05	1e-05	1e-05	1e-05	1e-05	1e-05	1e-05	1e-05	1e-05	1e-05	1e-05	1e-05	1e-05	1e-05	1e-05	1e-05	1e-05	1e-05	1e-05	1e-05	1e-05	1e-05	1e-05	1e-05	1e-05	1e-05	1e-05	1e-05	1e-05	1e-05	1e-05	1e-05
BEND3	1e-05	1e-05	1e-05	1e-05	1e-05	1e-05	1e-05	1e-05	1e-05	1e-05	1e-05	1e-05	1e-05	1e-05	1e-05	1e-05	1e-05	1e-05	1e-05	1e-05	1e-05	1e-05	1e-05	1e-05	1e-05	1e-05	1e-05	1e-05	1e-05	1e-05	1e-05	1e-05	1e-05	1e-05	1e-05	1e-05	1e-05	1e-05	1e-05	1e-05	1e-05	1e-05	1e-05	1e-05	1e-05	1e-05	1e-05	1e-05	1e-05
BET1	1e-05	1e-05	1e-05	1e-05	1.20841	1e-05	1e-05	1e-05	1e-05	1e-05	11.7278	1e-05	1e-05	1e-05	1.11405	0.683053	1e-05	1e-05	1.15607	1e-05	1e-05	0.67524	1e-05	1e-05	1e-05	1e-05	1e-05	1e-05	1e-05	1e-05	0.826803	1e-05	1e-05	0.673979	1e-05	1e-05	1e-05	0.477114	1e-05	1.40006	1e-05	1e-05	1e-05	3.43359	1e-05	1e-05	1e-05	1e-05	1e-05
BET1L	1e-05	1e-05	1e-05	1e-05	1e-05	1e-05	1e-05	1e-05	1e-05	1e-05	1e-05	1e-05	1e-05	1e-05	1e-05	1e-05	1e-05	1e-05	1e-05	1e-05	1e-05	1e-05	1e-05	1e-05	1e-05	1e-05	1e-05	1e-05	1e-05	1e-05	1e-05	1e-05	1e-05	1e-05	1e-05	1e-05	1e-05	1e-05	1e-05	1e-05	1e-05	1e-05	1e-05	1e-05	1e-05	1e-05	1e-05	1e-05	1e-05
BGN	2.2596	2.54952	0.138572	0.292538	2.58907	0.0894433	0.260899	0.140755	0.241936	0.171155	1.13962	2.77789	2.71377	2.55032	0.0741379	0.042082	16.4085	2.79442	2.58955	14.2999	2.81914	37.1666	2.84351	0.0924932	15.2103	2.42879	2.58847	0.0788762	0.035405	2.70796	2.73757	32.4934	21.5931	22.9291	2.97561	2.51193	3.02486	7.6908	2.51576	2.7388	0.11153	2.62712	0.0932996	2.36968	2.38399	2.91661	2.77519	2.62817	0.691621
BHMT	1.10511	2.54952	2.76675	0.187363	2.67255	2.66382	0.12128	2.46211	2.63341	2.08495	0.273512	0.868616	2.71377	2.55032	2.77399	0.512802	2.88042	0.839689	0.404358	3.35844	2.81914	2.55642	2.84351	2.27011	0.263652	2.42879	2.58847	2.65759	2.741	0.827156	2.73757	2.865	0.127717	2.42704	2.97561	2.51193	0.195449	2.71306	2.51576	2.7388	2.39571	2.62712	2.8486	2.36968	2.38399	2.91661	2.77519	7.38977	2.94865
BHMT2	1e-05	1e-05	1e-05	1e-05	1e-05	1e-05	1e-05	1e-05	1e-05	1e-05	0.285945	0.472426	1e-05	1e-05	1e-05	0.536111	1e-05	0.239887	0.422738	1e-05	1e-05	1e-05	1e-05	1e-05	1e-05	1e-05	1e-05	1e-05	1e-05	1e-05	1e-05	1e-05	1e-05	1e-05	1e-05	1e-05	1e-05	1e-05	1e-05	1e-05	1e-05	1e-05	1e-05	1e-05	1e-05	1e-05	1e-05	1e-05	1e-05
BICC1	1e-05	1e-05	1e-05	1e-05	1e-05	1e-05	1e-05	1e-05	1e-05	1e-05	1e-05	1e-05	1e-05	1e-05	1e-05	1e-05	1e-05	1e-05	1e-05	1e-05	1e-05	1e-05	1e-05	1e-05	1e-05	1e-05	1e-05	1e-05	1e-05	1e-05	1e-05	1e-05	1e-05	1e-05	1e-05	1e-05	1e-05	1e-05	1e-05	1e-05	1e-05	1e-05	1e-05	1e-05	1e-05	1e-05	1e-05	1e-05	1e-05
BICD2	1e-05	1e-05	1e-05	1e-05	1e-05	1e-05	1e-05	0.225111	1e-05	1e-05	1e-05	1e-05	1e-05	1e-05	1e-05	0.302999	0.181368	0.148889	1e-05	0.113469	1e-05	1e-05	1e-05	1e-05	1e-05	1e-05	1e-05	1e-05	1e-05	1e-05	1e-05	0.328447	1e-05	1e-05	1e-05	1e-05	1e-05	1e-05	1e-05	1e-05	1e-05	1e-05	1e-05	1e-05	1e-05	1e-05	1e-05	1e-05	1e-05
BICDL2	1.57837	1.08229	0.720978	1e-05	1e-05	0.248115	1e-05	0.699895	1e-05	1e-05	1e-05	1e-05	1e-05	0.67275	1e-05	1e-05	0.416563	1e-05	1e-05	18.5529	1.26362	1e-05	1e-05	1.24585	0.940979	1e-05	1e-05	1e-05	1e-05	1e-05	1e-05	1e-05	1e-05	1e-05	1.93224	1e-05	1e-05	1e-05	1e-05	1e-05	1e-05	1e-05	1e-05	1e-05	0.391605	1e-05	1e-05	1e-05	1e-05
BID	2.19794	1.76211	1e-05	1e-05	1e-05	1e-05	1.00558	1e-05	1e-05	0.977892	1e-05	1e-05	1e-05	1e-05	0.462792	2.08034	3.14095	1e-05	1e-05	3.09978	1.51217	1e-05	1e-05	1e-05	1e-05	1e-05	1.94735	1e-05	1e-05	1e-05	1e-05	1e-05	1e-05	1e-05	1.46895	1e-05	1e-05	1e-05	1e-05	1e-05	1e-05	1e-05	1e-05	1e-05	1.71827	1e-05	1e-05	1e-05	1e-05
BIN1	1e-05	1e-05	1e-05	1e-05	1e-05	0.350819	1e-05	1e-05	0.144656	1e-05	1e-05	1e-05	1e-05	1e-05	1e-05	1e-05	1e-05	1e-05	1e-05	2.71863	1e-05	1e-05	1e-05	1e-05	0.200594	1e-05	1e-05	1e-05	1e-05	1e-05	1e-05	1e-05	1e-05	1e-05	1e-05	1e-05	1e-05	0.778668	1e-05	1e-05	1e-05	0.133152	1e-05	1e-05	1e-05	1e-05	1e-05	1e-05	1e-05
BIN2	1e-05	1e-05	1e-05	1e-05	1e-05	1e-05	1e-05	1e-05	1e-05	1e-05	1e-05	1e-05	1e-05	1e-05	1e-05	0.111037	1e-05	1e-05	1e-05	1e-05	1e-05	1e-05	1e-05	1e-05	1e-05	1e-05	1e-05	1e-05	1e-05	1e-05	1e-05	1e-05	1e-05	1e-05	1e-05	1e-05	1e-05	1e-05	1e-05	1e-05	1e-05	1e-05	1e-05	1e-05	1e-05	1e-05	1e-05	0.0617085	1e-05
BIN3	2.2596	3.3045	2.76675	2.65573	2.58907	4.33052	2.68614	2.46211	2.63341	2.56695	2.91754	2.79517	2.71377	2.55032	2.77399	2.61719	2.88042	2.79442	2.58955	2.73894	2.81914	3.69345	2.84351	4.71824	2.75609	2.42879	2.58847	2.65759	2.741	2.70796	2.73757	2.9021	2.37353	3.49424	2.97561	2.51193	5.22744	4.30888	3.55799	2.7388	2.39571	3.66823	3.66263	5.42098	2.38399	2.91661	2.9491	2.62817	5.73943
BIRC6	1e-05	1e-05	1e-05	1e-05	1e-05	0.00482002	0.00947913	1e-05	0.0236768	1e-05	1e-05	1e-05	1e-05	0.00850425	0.0193599	0.00928276	1e-05	1e-05	1e-05	1e-05	1e-05	1e-05	1e-05	1e-05	1e-05	1e-05	1e-05	0.00847577	1e-05	1e-05	1e-05	0.00668716	0.00146051	1e-05	1e-05	1e-05	0.0167534	1e-05	0.079627	1e-05	0.012333	0.00771442	1e-05	1e-05	1e-05	1e-05	1e-05	1e-05	1e-05
BLK	1e-05	1e-05	1e-05	1e-05	1e-05	1e-05	1e-05	1e-05	1e-05	1e-05	1e-05	1e-05	1e-05	1e-05	1e-05	1e-05	1e-05	1e-05	1e-05	1e-05	1e-05	1e-05	1e-05	1e-05	1e-05	1e-05	1e-05	1e-05	1e-05	1e-05	1e-05	1e-05	1e-05	1e-05	1e-05	1e-05	1e-05	1e-05	1e-05	1e-05	1e-05	1e-05	1e-05	1e-05	1e-05	1e-05	1e-05	1e-05	1e-05
BLM	1e-05	1e-05	1e-05	1e-05	1e-05	1e-05	1e-05	1e-05	1e-05	1e-05	1e-05	1e-05	1e-05	1e-05	1e-05	1e-05	1e-05	1e-05	1e-05	1e-05	1e-05	1e-05	1e-05	1e-05	1e-05	1e-05	1e-05	1e-05	1e-05	1e-05	1e-05	1e-05	1e-05	1e-05	1e-05	1e-05	1e-05	1e-05	1e-05	1e-05	1e-05	1e-05	1e-05	1e-05	1e-05	1e-05	1e-05	1e-05	1e-05
BLMH	1.57296	1.65667	1.50065	0.129111	3.79879	1.95254	0.621963	3.60179	3.04573	2.55132	1.29593	3.65004	2.59162	0.413261	5.14616	1.59081	0.0827205	6.43847	1.62089	3.92522	1.81609	4.83161	11.4002	0.12257	1.23692	0.177281	3.37631	3.23842	2.94057	3.62154	2.89605	3.00267	3.86676	3.40691	0.330158	4.37425	1.2646	0.44525	4.12953	0.347962	4.09191	0.262794	5.53265	2.20919	2.83295	6.56324	7.74565	0.318173	5.96293
BLOC1S1	1e-05	1e-05	1e-05	1e-05	1e-05	1e-05	1.05338	1e-05	1e-05	1e-05	1e-05	1e-05	1e-05	1e-05	1e-05	1e-05	1e-05	1e-05	1e-05	1e-05	1e-05	1e-05	1e-05	1e-05	1e-05	1e-05	1e-05	1e-05	1e-05	1e-05	1e-05	1e-05	1e-05	1e-05	1e-05	1e-05	1e-05	1e-05	1e-05	1e-05	1e-05	1e-05	1e-05	1e-05	1e-05	1e-05	1e-05	1e-05	1e-05
BLOC1S2	1e-05	1e-05	1e-05	1e-05	1e-05	1e-05	1e-05	1e-05	1e-05	1e-05	1e-05	1e-05	1e-05	1e-05	1e-05	1e-05	1e-05	1e-05	1e-05	1e-05	1e-05	1e-05	1e-05	1e-05	1e-05	1e-05	1e-05	1e-05	1e-05	1e-05	1e-05	1e-05	1e-05	1e-05	1e-05	1e-05	1e-05	1e-05	1e-05	1e-05	1e-05	1e-05	1e-05	1e-05	1e-05	1e-05	1e-05	1e-05	1e-05
BLOC1S3	1e-05	1e-05	1e-05	1e-05	1e-05	1e-05	1e-05	1e-05	1e-05	1.03455	1e-05	1e-05	1e-05	1e-05	1e-05	1e-05	1e-05	1e-05	1e-05	1e-05	1e-05	1e-05	1e-05	1e-05	1e-05	1e-05	1e-05	1e-05	1e-05	4.83522	1e-05	1e-05	1e-05	1e-05	1e-05	1e-05	1e-05	1e-05	1e-05	1e-05	1e-05	1e-05	1e-05	1e-05	1e-05	1e-05	1e-05	1e-05	1e-05
BLOC1S4	2.2596	2.54952	2.76675	2.65573	1.59626	2.66382	2.68614	2.46211	2.63341	0.966015	2.91754	2.77789	2.71377	1.28781	1.64705	2.61719	2.88042	2.79442	2.58955	3.35844	0.992969	2.55642	0.924322	0.414959	2.75609	1.36833	0.320014	0.653677	0.997022	0.761118	2.73757	2.865	1.38219	2.42704	2.97561	1.34081	1.1374	2.71306	1.41727	0.879011	0.533464	2.62712	2.8486	1.53927	1.34044	1.21558	1.08213	2.62817	1.0936
BLOC1S6	1e-05	1e-05	1e-05	1e-05	1e-05	1e-05	1e-05	1e-05	1e-05	1e-05	1e-05	1e-05	1e-05	1e-05	1e-05	0.662399	1e-05	1e-05	1e-05	1e-05	1e-05	1e-05	1e-05	1e-05	0.541144	1e-05	1e-05	1e-05	1e-05	1e-05	1e-05	1e-05	1e-05	1e-05	1e-05	1e-05	1e-05	1e-05	1e-05	1e-05	1e-05	1e-05	1e-05	1e-05	1e-05	1e-05	1e-05	1e-05	1e-05
BLVRA	2.54947	3.05891	8.09302	0.0248079	4.18557	8.31247	2.06665	1.70782	3.05183	2.66291	3.01174	6.36091	3.43172	0.0530652	2.77919	0.158068	2.89224	4.88828	4.60544	1.10584	3.92938	2.79851	4.30505	2.15498	4.68099	2.65705	3.41036	1.9641	3.4486	4.71647	2.86075	7.52265	2.35094	4.50258	3.22831	4.66722	2.75028	3.14521	2.64679	3.49008	2.04777	4.05867	4.32465	4.14012	1.96012	4.8298	2.83415	2.79468	2.40651
BLVRB	3.95138	2.31849	5.94269	1.34094	2.58463	4.41238	1.07443	1.12641	1.86209	4.8771	3.61477	4.451	0.717506	2.50132	6.38221	0.76572	2.68776	4.03769	3.5825	7.7885	2.97195	5.01501	3.9393	10.8832	1.40139	3.34164	4.74527	2.11474	0.747098	2.47612	2.89063	0.882142	5.4759	2.75685	1.13377	0.194224	1.31885	1.84892	1.57682	7.10811	2.24721	1.02645	1.89247	2.45192	3.33058	0.56306	2.88036	6.80842	1.55248
BMERB1	1e-05	1e-05	1e-05	1e-05	1e-05	1e-05	1e-05	1e-05	1e-05	1e-05	1e-05	1e-05	1e-05	1e-05	1e-05	1e-05	1e-05	1e-05	1e-05	1e-05	1e-05	1e-05	1e-05	1e-05	1e-05	1e-05	1e-05	1e-05	1e-05	1e-05	1e-05	1e-05	1e-05	1e-05	1e-05	1e-05	1e-05	1e-05	1e-05	1e-05	1e-05	1e-05	1e-05	1e-05	1e-05	1e-05	1e-05	1e-05	1e-05
BMI1	1e-05	1e-05	1e-05	1e-05	1e-05	1e-05	1e-05	1e-05	1e-05	1e-05	1e-05	1e-05	1e-05	1e-05	1e-05	1e-05	1e-05	1e-05	1e-05	1e-05	1e-05	1e-05	1e-05	1e-05	1e-05	1e-05	1e-05	1e-05	1e-05	1e-05	1e-05	1e-05	1e-05	1e-05	1e-05	1e-05	1e-05	1e-05	1e-05	1e-05	1e-05	1e-05	1e-05	1e-05	1e-05	1e-05	1e-05	1e-05	1e-05
BMP1	1e-05	1e-05	1e-05	1e-05	1e-05	1e-05	1e-05	1e-05	1e-05	1e-05	1e-05	1e-05	1e-05	1e-05	1e-05	1e-05	1e-05	1e-05	1e-05	1e-05	1e-05	1e-05	1e-05	1e-05	1e-05	1e-05	1e-05	1e-05	1e-05	1e-05	1e-05	1e-05	1e-05	1e-05	1e-05	1e-05	1e-05	1e-05	1e-05	1e-05	1e-05	1e-05	1e-05	1e-05	1e-05	1e-05	1e-05	1e-05	1e-05
BMP2K	1e-05	1e-05	1e-05	1e-05	1e-05	1e-05	1e-05	1e-05	1e-05	1e-05	1e-05	1e-05	1e-05	1e-05	1e-05	1e-05	1e-05	1e-05	1e-05	1e-05	1e-05	1e-05	1e-05	1e-05	1e-05	1e-05	1e-05	1e-05	1e-05	1e-05	1e-05	1e-05	1e-05	1e-05	0.0748979	1e-05	1e-05	1e-05	1e-05	1e-05	1e-05	1e-05	1e-05	1e-05	1e-05	1e-05	1e-05	1e-05	1e-05
BMP8A	1e-05	1e-05	1e-05	1e-05	1e-05	1e-05	1e-05	1e-05	1e-05	1e-05	1e-05	1e-05	1e-05	1e-05	1e-05	1e-05	1e-05	1e-05	1e-05	1e-05	1e-05	1e-05	1e-05	1e-05	1e-05	1e-05	1e-05	1e-05	1e-05	1e-05	1e-05	1e-05	1e-05	1e-05	1e-05	1e-05	1e-05	1e-05	1e-05	1e-05	1e-05	1e-05	1e-05	1e-05	1e-05	1e-05	1e-05	1e-05	1e-05
BMP8B	1e-05	1e-05	1e-05	1e-05	1e-05	1e-05	1e-05	1e-05	1e-05	1e-05	1e-05	1e-05	1e-05	1e-05	1e-05	1e-05	1e-05	1e-05	1e-05	1e-05	1e-05	1e-05	1e-05	1e-05	1e-05	1e-05	1e-05	1e-05	1e-05	1e-05	1e-05	1e-05	1e-05	1e-05	1e-05	1e-05	1e-05	1e-05	1e-05	1e-05	1e-05	1e-05	1e-05	1e-05	1e-05	1e-05	1e-05	1e-05	1e-05
BMPER	1e-05	1e-05	1e-05	1e-05	1e-05	1e-05	1e-05	1e-05	1e-05	1e-05	1e-05	1e-05	1e-05	1e-05	1e-05	1e-05	1e-05	1e-05	1e-05	1e-05	1e-05	1e-05	1e-05	1e-05	1e-05	1e-05	1e-05	1e-05	1e-05	1e-05	1e-05	1e-05	1e-05	1e-05	1e-05	1e-05	1e-05	1e-05	1e-05	1e-05	1e-05	1e-05	1e-05	1e-05	1e-05	1e-05	1e-05	1e-05	1e-05
BMS1	0.301006	0.352777	0.437152	0.408092	0.473983	0.320549	0.360332	0.815915	0.440066	0.382227	0.349924	0.465211	0.392938	0.439043	0.542862	0.296691	0.537514	0.425272	0.418859	0.577538	0.435027	0.235912	0.316511	0.324049	0.413171	0.362184	0.252886	0.391817	0.370354	0.358214	0.41795	0.371877	0.367195	0.436038	0.288331	0.45678	0.519058	0.270732	0.459869	0.331193	0.295607	0.392371	0.172798	0.385125	0.299647	0.339898	0.471081	0.392038	0.548475
BNIP1	1e-05	1e-05	1e-05	1e-05	1e-05	1e-05	1e-05	1e-05	1e-05	1e-05	1e-05	1e-05	1e-05	1e-05	1e-05	1e-05	1e-05	1e-05	0.181422	1e-05	1e-05	1e-05	1e-05	1e-05	1e-05	1e-05	1e-05	1e-05	1e-05	1e-05	1e-05	1e-05	1e-05	1e-05	1e-05	1e-05	1e-05	1e-05	1e-05	1e-05	1e-05	1e-05	1e-05	1e-05	1e-05	1e-05	1e-05	1e-05	1e-05
BOD1	1e-05	1e-05	1e-05	1e-05	1e-05	1e-05	1e-05	1e-05	1e-05	1e-05	1e-05	1e-05	1e-05	1e-05	1e-05	1e-05	1e-05	1e-05	1e-05	1e-05	1e-05	1e-05	1e-05	1e-05	1e-05	1e-05	1e-05	1e-05	1e-05	1e-05	1e-05	1e-05	1e-05	1e-05	1e-05	1e-05	1e-05	1e-05	1e-05	1e-05	1e-05	1e-05	1e-05	1e-05	1e-05	1e-05	1e-05	1e-05	1e-05
BOD1L1	1e-05	1e-05	1e-05	1e-05	1e-05	1e-05	1e-05	1e-05	1e-05	1e-05	1e-05	1e-05	1e-05	1e-05	1e-05	1e-05	1e-05	1e-05	1e-05	1e-05	1e-05	1e-05	1e-05	1e-05	1e-05	1e-05	1e-05	1e-05	1e-05	1e-05	1e-05	1e-05	1e-05	1e-05	1e-05	1e-05	1e-05	1e-05	1e-05	1e-05	1e-05	1e-05	1e-05	1e-05	1e-05	1e-05	1e-05	0.161419	1e-05
BOK	1e-05	1e-05	1e-05	1e-05	1e-05	1e-05	1e-05	1e-05	1e-05	1e-05	1e-05	1e-05	1e-05	1e-05	1e-05	1e-05	1e-05	1e-05	1e-05	1e-05	1e-05	1e-05	1e-05	1e-05	1e-05	1e-05	1e-05	1e-05	1e-05	1e-05	1e-05	1e-05	1e-05	1e-05	1e-05	1e-05	1e-05	1e-05	1e-05	1e-05	1e-05	1e-05	1e-05	1e-05	1e-05	1e-05	1e-05	1e-05	1e-05
BOLA2	0.161958	1e-05	1e-05	1e-05	1e-05	1e-05	1e-05	1e-05	1e-05	1e-05	1e-05	1e-05	1e-05	1e-05	1e-05	1e-05	1e-05	1.95514	1e-05	1e-05	1e-05	1e-05	1.33341	1e-05	1e-05	1e-05	1e-05	1e-05	1e-05	1e-05	1e-05	1e-05	1e-05	1e-05	1e-05	1e-05	1e-05	1e-05	1e-05	1e-05	1e-05	1e-05	1e-05	1e-05	1e-05	1e-05	1e-05	1e-05	1e-05
BOLA3	1e-05	1e-05	1e-05	1e-05	1e-05	1e-05	1e-05	1e-05	1e-05	1e-05	1e-05	1e-05	1e-05	1e-05	1e-05	1e-05	1e-05	1e-05	1e-05	1e-05	1e-05	1e-05	1e-05	1e-05	1e-05	1e-05	1e-05	1e-05	1e-05	1e-05	1e-05	1e-05	1e-05	1e-05	1e-05	1e-05	1e-05	1e-05	1e-05	1e-05	1e-05	1e-05	1e-05	1e-05	1e-05	1e-05	1e-05	1e-05	0.396535
BOP1	1e-05	1e-05	1e-05	1e-05	1e-05	1e-05	1e-05	1e-05	1e-05	1e-05	1e-05	1e-05	1e-05	1e-05	1e-05	1e-05	1e-05	1e-05	1e-05	1e-05	1e-05	1e-05	1e-05	1e-05	1e-05	1e-05	1e-05	1e-05	1e-05	1e-05	1e-05	1e-05	1e-05	0.945162	1e-05	1e-05	1e-05	1e-05	1e-05	1e-05	1e-05	1e-05	1e-05	1.24702	1e-05	1e-05	1e-05	1e-05	1e-05
BORCS5	1e-05	1e-05	1e-05	1e-05	1e-05	1e-05	1e-05	1e-05	1e-05	1e-05	1e-05	1e-05	1e-05	1e-05	1e-05	1e-05	1e-05	1e-05	1e-05	1e-05	1e-05	1e-05	1e-05	1e-05	1e-05	1e-05	1e-05	1e-05	1e-05	1e-05	1e-05	1e-05	1e-05	1e-05	1e-05	1e-05	1e-05	1e-05	1e-05	1e-05	1e-05	1e-05	1e-05	1e-05	1e-05	1e-05	1e-05	1e-05	1e-05
BORCS6	1e-05	1e-05	1e-05	1e-05	1e-05	1e-05	1e-05	1e-05	1e-05	1e-05	1e-05	1e-05	1e-05	1e-05	1e-05	1e-05	1e-05	1e-05	1e-05	1e-05	1e-05	1e-05	0.12933	1e-05	1e-05	1e-05	1e-05	1e-05	1e-05	1e-05	1e-05	1e-05	1e-05	1e-05	1e-05	1e-05	1e-05	1e-05	0.406426	1e-05	1e-05	1e-05	1e-05	1e-05	1e-05	1e-05	1e-05	1e-05	0.344189
BORCS7	1e-05	1e-05	1e-05	1e-05	1e-05	1e-05	1e-05	1e-05	1e-05	1e-05	1e-05	1e-05	1e-05	1e-05	1e-05	1e-05	1e-05	1e-05	1e-05	1e-05	1e-05	1e-05	1e-05	1e-05	1e-05	1e-05	1e-05	1e-05	1e-05	1e-05	1e-05	1e-05	1e-05	1e-05	1e-05	1e-05	1e-05	1e-05	1e-05	1e-05	1e-05	1e-05	1e-05	1e-05	1e-05	1e-05	1e-05	1e-05	1e-05
BORCS8	1e-05	1e-05	1e-05	1e-05	1e-05	1e-05	1e-05	1e-05	1e-05	1e-05	1e-05	9.85547	1e-05	1e-05	1e-05	1e-05	1e-05	1e-05	1e-05	1e-05	1e-05	14.0609	1e-05	1e-05	1e-05	1e-05	1e-05	1e-05	1e-05	1e-05	1e-05	1e-05	1e-05	1e-05	1e-05	1e-05	1e-05	1e-05	1e-05	1e-05	1e-05	1e-05	1e-05	1e-05	1e-05	1e-05	1e-05	1e-05	1e-05
BPGM	0.115742	6.05017	0.33381	0.460181	0.957017	0.733252	0.523042	0.510235	1.32342	0.244257	0.824893	0.326938	0.909235	0.169477	0.56399	0.351537	7.22731	0.695124	0.308621	0.732115	0.502275	4.65641	4.12246	0.727429	0.33812	4.0019	0.68805	0.816914	0.109452	4.03894	2.22521	0.417415	0.637653	0.877884	0.727334	0.712063	3.97313	3.26131	0.492901	1.08515	0.644068	9.95869	0.930732	0.544876	0.43672	0.605939	6.44565	0.708042	13.1275
BPHL	1e-05	0.704231	1e-05	1e-05	1e-05	1e-05	1e-05	1e-05	1e-05	1e-05	1e-05	1e-05	1e-05	1e-05	1e-05	1e-05	1e-05	1e-05	1e-05	1e-05	1e-05	1e-05	1e-05	1e-05	1e-05	1e-05	1e-05	1e-05	1e-05	1e-05	1e-05	0.298806	2.47894	1e-05	1e-05	1e-05	1e-05	1e-05	1e-05	1e-05	1e-05	1e-05	1e-05	1e-05	1e-05	0.241637	1e-05	1e-05	1e-05
BPI	1e-05	1e-05	1e-05	1e-05	1e-05	1e-05	1e-05	1e-05	1e-05	1e-05	1e-05	0.489428	1e-05	1e-05	1e-05	1e-05	1e-05	1e-05	1e-05	1e-05	1e-05	1e-05	1e-05	1e-05	1e-05	1e-05	1e-05	1e-05	1e-05	1e-05	1e-05	1e-05	1e-05	1e-05	1e-05	1e-05	0.504361	1e-05	1e-05	1e-05	1e-05	0.119554	1e-05	1.19022	1e-05	1e-05	1e-05	1e-05	1e-05
BPIFA1	1e-05	1e-05	1e-05	1e-05	1e-05	1e-05	1e-05	1e-05	1e-05	1e-05	1e-05	1e-05	1e-05	1e-05	1e-05	1e-05	1e-05	1e-05	1e-05	1e-05	1e-05	1e-05	1e-05	1e-05	1e-05	1e-05	1e-05	1e-05	1e-05	1e-05	1e-05	1e-05	1e-05	1e-05	1e-05	1e-05	1e-05	1e-05	1e-05	1e-05	1e-05	1e-05	1e-05	1e-05	1e-05	1e-05	1e-05	1e-05	1e-05
BPIFB1	1e-05	1e-05	1e-05	1e-05	1e-05	0.350568	1e-05	1e-05	1e-05	1e-05	1e-05	0.265112	1e-05	1e-05	1e-05	1e-05	1e-05	1e-05	1e-05	1e-05	1e-05	1e-05	1e-05	1e-05	1e-05	1e-05	1e-05	1e-05	1e-05	1e-05	1e-05	1e-05	1e-05	1e-05	1e-05	1e-05	0.101311	1e-05	1e-05	1e-05	0.151613	0.199749	1e-05	1e-05	1e-05	1e-05	1e-05	1e-05	1e-05
BPNT1	1e-05	1e-05	1e-05	1e-05	1e-05	1e-05	0.383685	1e-05	4.67775	1e-05	1e-05	1e-05	1e-05	1.06032	1e-05	1e-05	1e-05	1e-05	1e-05	1e-05	1e-05	1e-05	1e-05	1e-05	1e-05	1e-05	1.7063	0.280095	1e-05	1e-05	1e-05	1e-05	1e-05	1e-05	1e-05	1e-05	1e-05	1e-05	0.262968	1e-05	1e-05	1e-05	0.766407	1e-05	1e-05	1e-05	1e-05	1e-05	1e-05
BPTF	1e-05	1e-05	1e-05	1e-05	1e-05	1e-05	1e-05	1e-05	1e-05	1e-05	1e-05	1e-05	1e-05	1e-05	1e-05	1e-05	1e-05	1e-05	1e-05	1e-05	1e-05	1e-05	1e-05	1e-05	1e-05	1e-05	1e-05	1e-05	1e-05	1e-05	1e-05	1e-05	1e-05	1e-05	1e-05	1e-05	1e-05	1e-05	1e-05	1e-05	1e-05	1e-05	1e-05	1e-05	1e-05	1e-05	1e-05	1e-05	1e-05
BRAF	0.305178	1e-05	0.330129	1e-05	0.229117	1e-05	0.231232	1e-05	1e-05	1e-05	1e-05	0.172251	0.437314	1e-05	1e-05	1e-05	1e-05	1e-05	1e-05	0.282683	1e-05	0.173986	0.198311	1e-05	1e-05	1e-05	0.228115	1e-05	1e-05	0.170019	1e-05	1e-05	1e-05	1e-05	0.348836	1e-05	0.387218	0.336389	1e-05	1e-05	1e-05	1e-05	1e-05	1e-05	1e-05	1e-05	1e-05	1e-05	0.177742
BRAT1	1e-05	1e-05	1e-05	1e-05	1e-05	0.7111	1e-05	1e-05	1e-05	0.286871	1e-05	1e-05	1e-05	1e-05	1e-05	0.39695	1e-05	0.163775	0.512727	1e-05	1e-05	0.579276	1e-05	1e-05	1e-05	1e-05	1e-05	1e-05	0.194009	1e-05	1e-05	1e-05	1e-05	1e-05	1e-05	0.269899	1e-05	1e-05	1e-05	1e-05	0.771512	0.502581	1e-05	0.278672	0.724668	1e-05	1e-05	1e-05	1e-05
BRCC3	1e-05	1e-05	1e-05	1e-05	1e-05	2.17288	0.270739	1e-05	1e-05	1e-05	1e-05	1e-05	1e-05	1e-05	1e-05	1e-05	1e-05	0.448036	1e-05	1e-05	1e-05	1e-05	1e-05	1e-05	1e-05	1e-05	1e-05	1e-05	2.12952	1e-05	1e-05	1e-05	1e-05	1e-05	1e-05	1e-05	1e-05	1e-05	1e-05	1e-05	1e-05	1e-05	1e-05	0.485591	1e-05	1e-05	1e-05	1e-05	1e-05
BRD1	1e-05	1e-05	1e-05	1e-05	1e-05	1e-05	1e-05	1e-05	1e-05	1e-05	1e-05	1e-05	1e-05	1e-05	1e-05	1e-05	1e-05	1e-05	1e-05	1e-05	1e-05	1e-05	1e-05	1e-05	1e-05	1e-05	1e-05	1e-05	1e-05	1e-05	1e-05	0.12844	1e-05	1e-05	1e-05	1e-05	1e-05	1e-05	1e-05	1e-05	1e-05	1e-05	1e-05	1e-05	1e-05	1e-05	1e-05	1e-05	1e-05
BRD3	1e-05	1e-05	1e-05	1e-05	1e-05	1e-05	1e-05	1e-05	1e-05	1e-05	1e-05	1e-05	1e-05	1e-05	1e-05	1e-05	1e-05	1e-05	1e-05	1e-05	1e-05	1e-05	1e-05	1e-05	1e-05	1e-05	1e-05	1e-05	1e-05	1e-05	1e-05	1e-05	1e-05	1e-05	1e-05	1e-05	1e-05	1e-05	1e-05	1e-05	1e-05	1e-05	1e-05	1e-05	1e-05	1e-05	1e-05	1e-05	1e-05
BRD4	1e-05	1e-05	1e-05	1e-05	1e-05	1e-05	1e-05	1e-05	1e-05	1e-05	1e-05	1e-05	1e-05	1e-05	1e-05	1e-05	1e-05	1e-05	1e-05	1e-05	1e-05	1.13698	1e-05	1e-05	1e-05	1e-05	1e-05	1e-05	1e-05	1e-05	1e-05	1e-05	1e-05	1e-05	1e-05	1e-05	1e-05	1e-05	2.14969	1e-05	1e-05	1e-05	1e-05	1e-05	1e-05	1e-05	1e-05	1e-05	1e-05
BRD7	0.431787	1e-05	1e-05	1e-05	1e-05	1e-05	1e-05	1e-05	1e-05	1e-05	1e-05	1e-05	1e-05	1e-05	1e-05	1e-05	1e-05	1e-05	1e-05	1e-05	1e-05	1e-05	1e-05	1e-05	1e-05	1e-05	1e-05	1e-05	1e-05	1e-05	1e-05	1e-05	1e-05	1e-05	1e-05	1e-05	1e-05	1e-05	1e-05	1e-05	1e-05	1e-05	1e-05	1e-05	1e-05	1e-05	1e-05	1e-05	1e-05
BRD9	1e-05	1e-05	1e-05	1e-05	0.252016	1e-05	1e-05	1e-05	1e-05	1e-05	1e-05	1e-05	1e-05	1e-05	1e-05	1e-05	1e-05	1e-05	1e-05	1e-05	1e-05	1e-05	1e-05	1e-05	1e-05	1e-05	1e-05	1e-05	1e-05	1e-05	1e-05	1e-05	1e-05	1e-05	1e-05	1e-05	1e-05	1e-05	1e-05	1e-05	1e-05	1e-05	1e-05	1e-05	1e-05	1e-05	1e-05	1e-05	1e-05
BRI3BP	1e-05	1e-05	1e-05	1e-05	1e-05	1e-05	1e-05	1e-05	1e-05	1e-05	1e-05	1e-05	1e-05	1e-05	1e-05	1e-05	1e-05	1e-05	1e-05	1e-05	1e-05	1e-05	1e-05	1e-05	1e-05	1e-05	1e-05	1e-05	1e-05	1e-05	1e-05	0.264387	1e-05	1e-05	1e-05	1e-05	1e-05	1e-05	1e-05	1e-05	1e-05	1e-05	1e-05	1e-05	1e-05	1e-05	1e-05	1e-05	1e-05
BRIX1	2.66984	1.83333	2.54948	2.65573	0.616646	2.66382	1.9085	2.46211	2.63341	2.90355	1.93363	1.16648	2.23457	1.64198	2.87959	2.61719	1.93103	0.918658	2.58955	3.35844	1.53736	2.55642	2.84351	2.27011	2.75609	2.01198	1.67576	2.65759	0.948821	2.70796	1.90141	2.865	2.52944	2.09197	2.01467	2.51193	3.05312	2.05199	1.87905	2.7388	2.39571	2.62712	2.8486	2.36968	1.05236	2.91661	2.77519	2.62817	2.94865
BRK1	1e-05	1e-05	1e-05	1e-05	1e-05	1e-05	3.08174	1e-05	1e-05	0.885726	1e-05	1e-05	1e-05	1e-05	1e-05	1e-05	2.18076	1e-05	1e-05	1e-05	1e-05	1e-05	1e-05	1e-05	1e-05	1e-05	2.49739	2.53725	1e-05	1e-05	1e-05	1e-05	1e-05	1e-05	1e-05	1e-05	1e-05	1e-05	1.58483	1e-05	1e-05	1e-05	0.608401	1e-05	1e-05	1e-05	2.1452	1e-05	2.93863
BRMS1	1e-05	1e-05	1e-05	1e-05	1e-05	1e-05	1e-05	1e-05	1e-05	1e-05	1e-05	1e-05	1e-05	1e-05	1e-05	1e-05	1e-05	1e-05	1e-05	1e-05	1e-05	1e-05	1e-05	1e-05	1e-05	1e-05	1e-05	1e-05	1e-05	1e-05	1e-05	1e-05	1e-05	1e-05	1e-05	1e-05	1e-05	1e-05	1e-05	1e-05	1e-05	1e-05	1e-05	1e-05	1e-05	1e-05	1e-05	1e-05	1e-05
BROX	1e-05	1e-05	1e-05	1e-05	1e-05	1e-05	1e-05	1e-05	1e-05	1e-05	1e-05	1e-05	1e-05	1e-05	1e-05	2.24935	1e-05	1e-05	1e-05	1e-05	1e-05	1e-05	1e-05	1e-05	1e-05	1e-05	1e-05	0.143908	1e-05	1e-05	1e-05	1e-05	1e-05	1e-05	1e-05	1e-05	1e-05	1e-05	1e-05	1e-05	1e-05	1e-05	1e-05	1e-05	1e-05	1e-05	1e-05	1e-05	1e-05
BRSK1	1e-05	1e-05	1e-05	1e-05	1e-05	1e-05	1e-05	1e-05	1e-05	1e-05	1e-05	1e-05	1e-05	1e-05	1e-05	1e-05	1e-05	1e-05	1e-05	1e-05	1e-05	1e-05	1e-05	1e-05	1e-05	1e-05	1e-05	1e-05	1e-05	1e-05	1e-05	1e-05	1e-05	1e-05	1e-05	1e-05	1e-05	1e-05	1e-05	0.0221621	1e-05	1e-05	1e-05	1e-05	1e-05	1e-05	1e-05	1e-05	1e-05
BSCL2	1e-05	1e-05	1e-05	1e-05	1e-05	1e-05	1e-05	1e-05	11.2654	1e-05	1e-05	1e-05	1e-05	1e-05	1e-05	1e-05	1e-05	1e-05	1e-05	1e-05	1e-05	1e-05	1e-05	1e-05	1e-05	1e-05	1e-05	1e-05	1e-05	1e-05	1e-05	1e-05	1e-05	1e-05	1e-05	1e-05	1e-05	1e-05	1e-05	1e-05	1e-05	1e-05	1e-05	1e-05	1e-05	1e-05	1e-05	1e-05	1e-05
BSDC1	1e-05	1e-05	1e-05	1e-05	1e-05	1e-05	1e-05	1e-05	1e-05	1e-05	0.21026	1e-05	1e-05	1e-05	1e-05	1e-05	1e-05	1e-05	1e-05	1e-05	1e-05	0.0869016	1e-05	1e-05	1e-05	1e-05	1e-05	1e-05	1e-05	1e-05	1e-05	0.485597	1e-05	1e-05	1e-05	1e-05	1e-05	1e-05	1e-05	0.184888	1e-05	1e-05	1e-05	1e-05	1e-05	1e-05	1e-05	1e-05	1e-05
BSG	2.2596	0.235176	2.76675	2.65573	2.58907	2.66382	1.18525	1.46478	2.63341	2.56695	2.91754	6.26054	8.16407	2.55032	2.77399	2.61719	0.260835	2.79442	0.204481	51.6409	6.74273	2.55642	2.84351	0.208867	1.54634	13.9213	2.58847	2.65759	2.76408	2.70796	1.37435	29.833	1.19249	2.42704	7.34877	2.51193	1.01254	2.71306	1.50043	2.7388	2.39571	2.62712	1.46397	0.0653708	1.09631	2.91661	1.78653	0.773967	2.94865
BSN	2.2596	2.54952	2.76675	2.65573	2.58907	0.110615	2.68614	2.46211	2.63341	0.20356	0.083854	0.300466	0.104462	2.55032	2.77399	0.136517	2.88042	2.79442	2.58955	3.35844	2.81914	2.55642	0.10057	0.067313	0.0793926	2.42879	0.145923	0.161165	2.741	0.175445	2.73757	2.865	2.52944	2.42704	2.97561	0.203269	3.02486	2.71306	2.51576	2.7388	2.39571	0.202537	0.0843187	0.112565	2.38399	2.91661	0.064674	0.268086	2.94865
BSPRY	1e-05	1e-05	1e-05	1e-05	1e-05	1e-05	1e-05	1e-05	1e-05	1e-05	1e-05	1e-05	1e-05	1e-05	1e-05	1e-05	1e-05	1e-05	1e-05	1e-05	1e-05	1e-05	1e-05	1e-05	1e-05	1e-05	1e-05	1e-05	1e-05	1e-05	1e-05	1e-05	1e-05	1e-05	1e-05	1e-05	1e-05	1e-05	1e-05	1e-05	1e-05	1e-05	1e-05	1e-05	1e-05	1e-05	1e-05	1e-05	1e-05
BST1	2.2596	2.54952	2.76675	2.65573	2.58907	2.66382	0.086832	0.263324	0.103233	2.56695	2.91754	2.77789	2.71377	0.103461	0.335246	2.61719	2.88042	0.158927	2.58955	3.35844	2.81914	0.8489	2.84351	0.342035	2.75609	2.42879	2.88786	2.65759	2.741	2.70796	0.446579	0.211685	2.52944	0.180939	2.97561	0.062386	0.12178	2.71306	2.51576	2.7388	2.39571	2.62712	2.8486	2.36968	2.38399	2.91661	0.0702849	0.0941274	2.94865
BST2	1e-05	1e-05	1e-05	1e-05	1e-05	1e-05	1e-05	1e-05	1e-05	1e-05	1e-05	1e-05	1e-05	1e-05	1e-05	1e-05	1e-05	1e-05	1e-05	1e-05	1e-05	1e-05	1e-05	1e-05	1e-05	1e-05	1e-05	1e-05	1e-05	1e-05	1e-05	1e-05	1e-05	1e-05	1e-05	1e-05	1e-05	1e-05	1e-05	1e-05	1e-05	1e-05	1e-05	1e-05	1e-05	1e-05	1e-05	1e-05	1e-05
BTAF1	1e-05	1e-05	1e-05	1e-05	1e-05	1e-05	1e-05	0.0580233	1e-05	1e-05	1e-05	1e-05	1e-05	1e-05	1e-05	1e-05	1e-05	1e-05	0.240365	1e-05	1.04467	0.874662	1e-05	1e-05	1e-05	1e-05	1e-05	1e-05	1e-05	1e-05	1e-05	1e-05	1e-05	1e-05	1e-05	1e-05	1e-05	1.00037	1e-05	1e-05	0.755685	0.205248	1e-05	1e-05	1e-05	1e-05	1e-05	1e-05	1e-05
BTBD1	1e-05	1e-05	1e-05	1e-05	1e-05	1e-05	1e-05	1e-05	1e-05	1e-05	1e-05	1e-05	1e-05	1e-05	1e-05	1e-05	1e-05	1e-05	1e-05	1e-05	1e-05	1e-05	1e-05	1e-05	1e-05	1e-05	1e-05	1e-05	1e-05	1e-05	1e-05	1e-05	1e-05	1e-05	1e-05	1e-05	1e-05	1e-05	1e-05	1e-05	1e-05	1e-05	1e-05	1e-05	1e-05	1e-05	1e-05	1e-05	1e-05
BTBD11	1e-05	1e-05	1e-05	1e-05	1e-05	1e-05	1e-05	1e-05	1e-05	1e-05	1e-05	1e-05	1e-05	1e-05	1e-05	1e-05	1e-05	1e-05	1e-05	1e-05	1e-05	1e-05	1e-05	1e-05	1e-05	1e-05	1e-05	1e-05	1e-05	1e-05	1e-05	1e-05	1e-05	1e-05	1e-05	1e-05	1e-05	1e-05	1e-05	1e-05	1e-05	1e-05	1e-05	1e-05	1e-05	1e-05	1e-05	1e-05	1e-05
BTD	43.4868	50.5194	33.0034	35.5487	43.0637	43.9981	43.3995	30.5995	38.766	39.3358	35.3027	45.5628	43.0709	40.2721	30.5577	27.2253	37.7964	40.746	37.1635	16.1742	26.9554	38.675	36.599	49.0714	40.9361	42.6004	30.4075	30.8534	25.6985	37.7917	38.7341	48.1665	37.5046	50.1588	36.0173	31.0382	36.4641	31.4125	45.4332	40.0737	49.595	33.5113	34.1786	45.2542	49.4052	52.0056	52.2261	64.8226	34.2241
BTF3	1e-05	0.101507	0.27269	0.0571094	0.10754	1e-05	1e-05	1e-05	0.161101	1e-05	1e-05	1e-05	1e-05	1e-05	0.14261	1e-05	0.193597	1e-05	1e-05	0.0437376	0.134416	1e-05	0.105498	1e-05	1e-05	1e-05	1e-05	1e-05	1e-05	1e-05	1e-05	1e-05	1e-05	1e-05	1e-05	1e-05	0.199834	1e-05	1e-05	1e-05	1e-05	1e-05	1e-05	1e-05	1e-05	1e-05	1e-05	1e-05	1e-05
BTF3L4	1e-05	1e-05	1e-05	1e-05	1e-05	1e-05	1e-05	1e-05	1e-05	1e-05	1e-05	1e-05	1.69092	1e-05	1e-05	1e-05	1e-05	1e-05	1e-05	1e-05	1e-05	1e-05	1e-05	1e-05	1e-05	1e-05	1e-05	1e-05	1e-05	1e-05	1.85023	1e-05	1e-05	1e-05	1e-05	0.247009	1e-05	1e-05	1e-05	1e-05	1e-05	1e-05	1e-05	1e-05	1e-05	1e-05	0.483672	1e-05	1e-05
BTK	1e-05	1e-05	1e-05	1e-05	1e-05	1e-05	1e-05	1e-05	1e-05	1e-05	1e-05	1e-05	1e-05	1e-05	1e-05	1e-05	1e-05	1e-05	1e-05	1e-05	1e-05	1e-05	1e-05	1e-05	1e-05	1e-05	1e-05	1e-05	1e-05	1e-05	1e-05	1e-05	1e-05	1e-05	0.133098	1e-05	1e-05	1e-05	1e-05	1e-05	1e-05	1e-05	1e-05	1e-05	1e-05	1e-05	0.235281	1e-05	1e-05
BTN2A1	1e-05	1e-05	1e-05	1e-05	1e-05	1e-05	1e-05	1e-05	1e-05	1e-05	1e-05	1e-05	1e-05	1e-05	1e-05	1e-05	1e-05	1e-05	1e-05	1e-05	1e-05	1e-05	1e-05	1e-05	1e-05	1e-05	1e-05	1e-05	1e-05	1e-05	1e-05	1e-05	1e-05	1e-05	1e-05	1e-05	1e-05	1e-05	1e-05	1e-05	1e-05	1e-05	1e-05	1e-05	1e-05	1e-05	1e-05	1e-05	1e-05
BTN2A2	1e-05	1e-05	1e-05	1e-05	1e-05	1e-05	1e-05	1e-05	1e-05	1e-05	1e-05	1e-05	1e-05	1e-05	1e-05	1e-05	1e-05	1e-05	1e-05	1e-05	1e-05	1e-05	1e-05	1e-05	1e-05	1e-05	1e-05	1e-05	1e-05	1e-05	1e-05	1e-05	1e-05	1e-05	1e-05	1e-05	1e-05	1e-05	1e-05	1e-05	1e-05	1e-05	1e-05	1e-05	1e-05	1e-05	1e-05	1e-05	1e-05
BTN3A1	1e-05	1e-05	1e-05	1e-05	1e-05	1e-05	1e-05	1e-05	1e-05	1e-05	1e-05	1e-05	1e-05	1e-05	1e-05	1e-05	1e-05	1e-05	1e-05	1e-05	1e-05	1e-05	1e-05	1e-05	1e-05	1e-05	1e-05	1e-05	1e-05	1e-05	1e-05	1e-05	1e-05	1e-05	1e-05	1e-05	1e-05	1e-05	1e-05	1e-05	1e-05	1e-05	1e-05	1e-05	1e-05	1e-05	1e-05	1e-05	1e-05
BTN3A2	1e-05	1e-05	1e-05	1e-05	1e-05	1e-05	1e-05	1e-05	1e-05	1e-05	1e-05	1e-05	1e-05	1e-05	1e-05	1e-05	1e-05	1e-05	1e-05	1e-05	1e-05	1e-05	1e-05	1e-05	1e-05	1e-05	1e-05	1e-05	1e-05	1e-05	1e-05	1e-05	1e-05	1e-05	1e-05	1e-05	1e-05	1e-05	1e-05	1e-05	1e-05	1e-05	1e-05	1e-05	1e-05	1e-05	1e-05	1e-05	1e-05
BTN3A3	1e-05	1e-05	1e-05	1e-05	1e-05	1e-05	1e-05	1e-05	1e-05	1e-05	1e-05	1e-05	1e-05	1e-05	1e-05	1e-05	1e-05	1e-05	1e-05	1e-05	1e-05	1e-05	1e-05	1e-05	1e-05	1e-05	1e-05	1e-05	1e-05	1e-05	1e-05	1e-05	1e-05	1e-05	1e-05	1e-05	1e-05	1e-05	1e-05	1e-05	1e-05	1e-05	1e-05	1e-05	1e-05	1e-05	1e-05	1e-05	1e-05
BTRC	1e-05	1e-05	1e-05	1e-05	1e-05	1e-05	1e-05	1e-05	1e-05	1e-05	1e-05	1e-05	1e-05	1e-05	1e-05	1e-05	1e-05	1e-05	1e-05	1e-05	1e-05	1e-05	1e-05	1e-05	1e-05	1e-05	1e-05	1e-05	1e-05	1e-05	1e-05	1e-05	1e-05	1e-05	1e-05	1e-05	1e-05	1e-05	1e-05	1e-05	1e-05	1e-05	1e-05	1e-05	1e-05	1e-05	1e-05	1e-05	1e-05
BUB1B	9.31101	8.73412	8.78123	2.8858	11.632	7.20157	9.09372	6.24318	12.9041	7.96652	7.03944	9.53033	8.29087	7.11892	17.0099	8.29609	8.18056	7.6763	3.73756	6.31581	8.00902	9.90077	10.4277	5.75229	6.7092	2.71193	5.88672	9.3644	10.8576	2.91899	9.69682	6.48149	6.0388	6.1631	12.3156	5.82754	14.3783	8.14395	9.49127	5.8163	6.69122	8.54998	7.82674	7.15587	5.94696	5.5641	8.11553	6.69341	9.89619
BUB3	1e-05	1e-05	1e-05	0.130983	1e-05	1e-05	0.0681944	1e-05	1e-05	1e-05	1e-05	0.797007	0.141393	1e-05	1e-05	1e-05	1e-05	1e-05	1e-05	1e-05	1e-05	0.0593947	1e-05	1e-05	1e-05	1e-05	1.47439	1e-05	0.138206	1e-05	1e-05	1e-05	1e-05	1e-05	0.826951	0.255673	1e-05	1e-05	0.122617	1e-05	1e-05	0.330117	1e-05	1e-05	1e-05	1e-05	1e-05	1e-05	1e-05
BUD23	1e-05	1e-05	1e-05	1e-05	1e-05	1e-05	11.0905	1e-05	1e-05	9.26745	1e-05	1e-05	1e-05	1e-05	1e-05	1e-05	1e-05	1e-05	1e-05	1e-05	1e-05	1e-05	1e-05	1e-05	1e-05	1e-05	10.3663	1e-05	1e-05	1e-05	1e-05	1e-05	1e-05	1e-05	1e-05	1e-05	1e-05	1e-05	1e-05	13.9052	1e-05	1e-05	1e-05	1e-05	1e-05	1e-05	1e-05	1e-05	1e-05
BUD31	1e-05	1e-05	0.488608	1e-05	1e-05	1e-05	1e-05	1e-05	1e-05	1e-05	1e-05	1e-05	1e-05	1e-05	1e-05	1e-05	1e-05	1e-05	1e-05	1e-05	1e-05	1e-05	1e-05	1e-05	1e-05	1e-05	1e-05	1e-05	1e-05	1e-05	1e-05	1e-05	1e-05	1e-05	0.303504	1e-05	1e-05	1e-05	1e-05	1e-05	1e-05	1e-05	1e-05	1e-05	1e-05	1e-05	1e-05	1e-05	1e-05
BYSL	1e-05	1e-05	1e-05	1e-05	1e-05	1e-05	1e-05	1e-05	1e-05	1e-05	1e-05	1e-05	1e-05	1e-05	0.320953	0.299473	1e-05	0.411228	1e-05	1e-05	1e-05	1e-05	1e-05	0.427594	1e-05	0.313087	1e-05	1e-05	1e-05	1e-05	1e-05	0.416715	1e-05	1e-05	1e-05	1e-05	1e-05	1e-05	1e-05	1e-05	1e-05	1e-05	1e-05	0.216882	1e-05	1e-05	1e-05	1e-05	1e-05
BZW1	1e-05	1e-05	1e-05	1e-05	1e-05	1e-05	1e-05	1e-05	1e-05	1e-05	1e-05	1e-05	1e-05	1e-05	1e-05	0.230082	0.0101424	0.187281	1e-05	1e-05	1e-05	1e-05	1e-05	1e-05	1e-05	1e-05	1e-05	1e-05	1e-05	0.694035	0.405772	1e-05	1e-05	1e-05	1e-05	1e-05	1e-05	1e-05	1e-05	1e-05	1e-05	1e-05	1e-05	1e-05	1e-05	1e-05	0.0141914	1e-05	1e-05
BZW2	1e-05	1e-05	1e-05	1e-05	1e-05	1e-05	1e-05	0.412903	1e-05	1e-05	1e-05	1e-05	1e-05	1e-05	0.264277	1e-05	0.0364481	0.119773	1e-05	0.450044	1e-05	1e-05	1e-05	1e-05	0.282689	1e-05	1e-05	1e-05	1e-05	0.0269154	1e-05	1e-05	0.115931	1e-05	1e-05	0.807772	1e-05	1e-05	1e-05	1e-05	1e-05	1e-05	1e-05	1e-05	1.6329	1e-05	0.401692	1e-05	1e-05
C11orf52	1e-05	1e-05	1e-05	1e-05	1e-05	1e-05	1e-05	1e-05	1e-05	1e-05	1e-05	1e-05	1e-05	1e-05	1e-05	1e-05	1e-05	1e-05	1e-05	1e-05	1e-05	1e-05	1e-05	1e-05	1e-05	1e-05	1e-05	1e-05	1e-05	1e-05	1e-05	1e-05	1e-05	1e-05	1e-05	1e-05	1e-05	1e-05	1e-05	1e-05	1e-05	1e-05	1e-05	1e-05	1e-05	1e-05	1e-05	1e-05	1e-05
C11orf54	2.2596	0.236907	0.103735	2.65573	2.58907	2.66382	2.68614	2.46211	1.5423	2.56695	1.52886	0.337319	1.03148	2.55032	0.413469	2.61719	2.88042	2.79442	2.58955	3.35844	2.81914	2.55642	0.141663	2.27011	2.75609	2.42879	2.58847	2.65759	2.741	2.70796	2.73757	2.865	1.89077	2.42704	2.97561	2.51193	3.02486	2.71306	0.54771	2.7388	2.39571	0.168908	0.178795	1.34913	0.065317	2.91661	0.083289	2.62817	2.94865
C11orf58	1e-05	1e-05	1e-05	1e-05	0.885369	0.138714	1e-05	1e-05	1e-05	1e-05	1e-05	1e-05	1e-05	1e-05	1e-05	1e-05	1e-05	1e-05	1e-05	1e-05	1e-05	1e-05	1e-05	1e-05	1e-05	1e-05	0.0566601	1e-05	1e-05	1e-05	1e-05	1e-05	0.202541	1e-05	1e-05	1e-05	1e-05	1e-05	1e-05	1e-05	1e-05	0.0977431	1e-05	1e-05	0.101514	1e-05	1.13481	1e-05	1e-05
C11orf68	1e-05	1e-05	1e-05	1e-05	1e-05	1e-05	1e-05	1e-05	1e-05	1e-05	1e-05	1e-05	1e-05	1e-05	1e-05	1e-05	1e-05	1e-05	1e-05	1e-05	1e-05	1e-05	1e-05	1e-05	1e-05	1e-05	1e-05	1e-05	1e-05	1e-05	1e-05	1e-05	1e-05	1e-05	1e-05	1e-05	1e-05	1e-05	1e-05	1e-05	1e-05	1e-05	1e-05	1e-05	1e-05	1e-05	1e-05	1e-05	1e-05
C11orf96	1e-05	1e-05	1e-05	1e-05	1e-05	1e-05	1e-05	1e-05	1e-05	1e-05	1e-05	1e-05	1e-05	1e-05	1e-05	1e-05	1e-05	1e-05	1e-05	1e-05	1e-05	1e-05	1e-05	1e-05	1e-05	1e-05	1e-05	1e-05	1e-05	1e-05	1e-05	1e-05	1e-05	1e-05	1e-05	1e-05	1e-05	1e-05	1e-05	1e-05	1e-05	1e-05	1e-05	1e-05	1e-05	1e-05	1e-05	1e-05	1e-05
C12orf10	0.0886004	0.305537	2.76675	0.84832	2.58907	2.66382	2.68614	2.46211	2.63341	2.56695	2.91754	2.77789	0.122231	2.55032	2.77399	2.61719	0.144093	0.433222	0.38622	3.35844	0.402623	2.55642	2.84351	2.27011	2.75609	0.272201	2.58847	2.65759	0.530786	1.09936	2.73757	0.0889556	2.52944	2.42704	0.502468	2.51193	3.02486	0.788031	2.51576	2.7388	0.183225	0.794292	1.09513	2.36968	2.38399	2.91661	2.77519	2.62817	0.625316
C12orf4	1e-05	1e-05	1e-05	1e-05	1e-05	1e-05	1e-05	1e-05	1e-05	1e-05	1e-05	1e-05	1e-05	1e-05	1e-05	1e-05	1e-05	1e-05	1e-05	1e-05	1e-05	1e-05	1e-05	1e-05	1e-05	1e-05	1e-05	1e-05	1e-05	1e-05	1e-05	1e-05	1e-05	1e-05	1e-05	1e-05	1e-05	1e-05	1e-05	1e-05	1e-05	1e-05	1e-05	1e-05	1e-05	1e-05	1e-05	1e-05	1e-05
C12orf45	1e-05	1e-05	1e-05	1e-05	1e-05	1e-05	1e-05	1e-05	1e-05	1e-05	1e-05	1e-05	1e-05	1e-05	1e-05	1e-05	1e-05	1e-05	1e-05	1e-05	1e-05	1e-05	1e-05	1e-05	1e-05	1e-05	1e-05	1e-05	1e-05	1e-05	1e-05	1e-05	1e-05	1e-05	1e-05	1e-05	1e-05	1e-05	1e-05	1e-05	1e-05	1e-05	1e-05	1e-05	1e-05	1e-05	1e-05	7.25191	1e-05
C12orf57	1e-05	1e-05	1e-05	1e-05	1e-05	1e-05	1e-05	1e-05	1e-05	1e-05	1e-05	1e-05	1e-05	1e-05	1e-05	0.44714	1e-05	1e-05	1e-05	1e-05	1e-05	1e-05	1e-05	1e-05	1e-05	1e-05	1e-05	1e-05	1e-05	1e-05	1e-05	1e-05	1e-05	1e-05	1e-05	1e-05	1e-05	1e-05	1e-05	1e-05	1e-05	1e-05	1e-05	1e-05	1e-05	1e-05	1e-05	1e-05	1e-05
C15orf48	1e-05	1e-05	1e-05	1e-05	1e-05	1e-05	1e-05	1e-05	1e-05	1e-05	1e-05	1e-05	1e-05	1e-05	1e-05	1e-05	1e-05	1e-05	1e-05	1e-05	1e-05	1e-05	1e-05	1e-05	1e-05	1e-05	1e-05	1e-05	1e-05	1e-05	1e-05	1e-05	1e-05	1e-05	1e-05	1e-05	1e-05	1e-05	1e-05	1e-05	1e-05	1e-05	1e-05	1e-05	1e-05	1e-05	1e-05	1e-05	1e-05
C16orf54	1e-05	1e-05	1e-05	1e-05	1e-05	1e-05	1e-05	1e-05	1e-05	1e-05	1e-05	1e-05	1e-05	1e-05	1e-05	1e-05	1e-05	1e-05	1e-05	1e-05	1e-05	1e-05	1e-05	1e-05	1e-05	1e-05	1e-05	1e-05	1e-05	1e-05	1e-05	1e-05	1e-05	1e-05	1e-05	1e-05	1e-05	1e-05	1e-05	1e-05	1e-05	1e-05	1e-05	1e-05	1e-05	1e-05	1e-05	1e-05	1e-05
C16orf58	1e-05	1e-05	1e-05	1e-05	1e-05	1e-05	1e-05	1e-05	1e-05	1e-05	1e-05	1e-05	1e-05	1e-05	1e-05	1e-05	1e-05	1e-05	1e-05	1e-05	1e-05	1e-05	0.046759	1e-05	1e-05	0.86256	1e-05	1e-05	0.0537492	1e-05	1e-05	1e-05	1e-05	1e-05	1e-05	0.0489196	1e-05	1e-05	1e-05	1e-05	1e-05	1e-05	1e-05	1e-05	1e-05	1e-05	1e-05	1e-05	1e-05
C16orf89	1e-05	1e-05	1e-05	1e-05	1e-05	1e-05	1e-05	1e-05	1e-05	1e-05	1e-05	1e-05	1e-05	1e-05	1e-05	1e-05	1e-05	1e-05	1e-05	1e-05	1e-05	1e-05	1e-05	1e-05	1e-05	1e-05	1e-05	1e-05	1e-05	1e-05	1e-05	1e-05	1e-05	1e-05	1e-05	1e-05	1e-05	1e-05	1e-05	1e-05	1e-05	1e-05	1e-05	1e-05	1e-05	1e-05	1e-05	1e-05	1e-05
C17orf49	1.41707	1e-05	1e-05	1e-05	1e-05	1e-05	1e-05	1e-05	1e-05	1e-05	1e-05	1e-05	1e-05	1e-05	1e-05	2.0755	1e-05	1e-05	1e-05	1e-05	1e-05	1e-05	1e-05	1e-05	45.9264	1e-05	1e-05	1e-05	1e-05	1e-05	1e-05	1e-05	1e-05	1e-05	1e-05	1e-05	1e-05	1e-05	1e-05	1e-05	1e-05	1e-05	1e-05	1e-05	1e-05	1e-05	1e-05	1e-05	1e-05
C17orf58	1e-05	0.360752	1e-05	1e-05	1e-05	1e-05	1e-05	1e-05	1e-05	1e-05	1e-05	1e-05	1e-05	1e-05	1e-05	1e-05	1e-05	1e-05	1e-05	1e-05	1e-05	1e-05	1e-05	1e-05	1e-05	1e-05	1e-05	1e-05	1e-05	1e-05	1e-05	1e-05	1e-05	1e-05	1e-05	1e-05	1e-05	1e-05	1e-05	1e-05	1e-05	1e-05	1e-05	1e-05	1e-05	1e-05	1e-05	1e-05	1e-05
C17orf75	1e-05	1e-05	1e-05	1e-05	1e-05	0.0556463	1e-05	1e-05	1e-05	1e-05	1e-05	1e-05	1e-05	1e-05	1e-05	1e-05	0.167426	1e-05	1e-05	1e-05	1e-05	1e-05	1e-05	1e-05	1e-05	1e-05	1e-05	1e-05	1e-05	1e-05	1e-05	1e-05	1e-05	1e-05	1e-05	1e-05	1e-05	1e-05	1e-05	1e-05	1e-05	1e-05	1e-05	1e-05	1e-05	1e-05	1e-05	1e-05	1e-05
C19orf25	1e-05	1e-05	1e-05	1e-05	1e-05	1e-05	1e-05	1e-05	1e-05	1e-05	1e-05	1e-05	1e-05	1e-05	1e-05	1e-05	1e-05	1e-05	1e-05	1e-05	1e-05	1e-05	1e-05	1e-05	1e-05	1e-05	1e-05	1e-05	1e-05	1e-05	1e-05	1e-05	0.395699	1e-05	1e-05	1e-05	1e-05	1e-05	1e-05	1e-05	1e-05	1e-05	1e-05	1e-05	1e-05	1e-05	1e-05	1e-05	1e-05
C19orf38	1e-05	1e-05	1e-05	1e-05	1e-05	1e-05	1e-05	1e-05	1e-05	1e-05	1e-05	1e-05	1e-05	1e-05	1e-05	1e-05	1e-05	1e-05	1e-05	1e-05	1e-05	1e-05	1e-05	1e-05	1e-05	1e-05	1e-05	1e-05	1e-05	1e-05	1e-05	1e-05	1e-05	1e-05	1e-05	1e-05	1e-05	1e-05	1e-05	1e-05	1e-05	1e-05	1e-05	1e-05	1e-05	1e-05	1e-05	1e-05	1e-05
C1GALT1C1	1e-05	1e-05	1e-05	1e-05	1e-05	1e-05	1e-05	1e-05	1e-05	1e-05	1e-05	1e-05	1e-05	1e-05	1e-05	1e-05	1e-05	1e-05	1e-05	1e-05	1e-05	1e-05	1e-05	1e-05	1e-05	1e-05	1e-05	1e-05	1e-05	1e-05	1e-05	1e-05	1e-05	1e-05	1e-05	1e-05	1e-05	1e-05	1e-05	1e-05	1e-05	1e-05	1e-05	1e-05	1e-05	1e-05	1e-05	1e-05	1e-05
C1orf116	1e-05	1e-05	1e-05	1e-05	1e-05	1e-05	1e-05	1e-05	1e-05	1e-05	1e-05	1e-05	1e-05	1e-05	1e-05	1e-05	1e-05	1e-05	1e-05	1e-05	1e-05	1e-05	1e-05	1e-05	1e-05	1e-05	1e-05	1e-05	1e-05	1e-05	1e-05	1e-05	1e-05	1e-05	1e-05	1e-05	1e-05	1e-05	1e-05	1e-05	1e-05	1e-05	1e-05	1e-05	1e-05	1e-05	1e-05	1e-05	1e-05
C1orf122	1e-05	1e-05	1e-05	1e-05	1e-05	1e-05	1e-05	1e-05	1e-05	1e-05	1e-05	1e-05	1e-05	1e-05	1e-05	1e-05	1e-05	1e-05	1e-05	1e-05	1e-05	1e-05	1e-05	1e-05	1e-05	1e-05	1e-05	1e-05	1e-05	1e-05	1e-05	1e-05	1e-05	1e-05	1e-05	1e-05	1e-05	1e-05	1e-05	1e-05	1e-05	1e-05	1e-05	1e-05	1e-05	1e-05	1e-05	1e-05	1e-05
C1orf198	1e-05	1e-05	1e-05	1e-05	1e-05	1e-05	1e-05	1e-05	1e-05	1e-05	1e-05	1e-05	1e-05	1e-05	0.880241	1e-05	1e-05	1e-05	1e-05	1e-05	1e-05	1e-05	1e-05	1e-05	1e-05	1e-05	1e-05	1e-05	1e-05	1e-05	1e-05	1e-05	1e-05	1e-05	1e-05	1e-05	1e-05	1e-05	1e-05	1e-05	1e-05	1e-05	1e-05	1e-05	1e-05	1e-05	1e-05	1e-05	1e-05
C1orf35	1e-05	0.289828	1e-05	1e-05	1e-05	0.289453	0.645284	1e-05	0.579821	1e-05	1e-05	0.742331	0.253842	1e-05	1e-05	1e-05	1e-05	1e-05	0.231057	1e-05	1e-05	1e-05	1e-05	1e-05	1e-05	1e-05	1e-05	1e-05	0.262838	1e-05	1e-05	1e-05	1e-05	1e-05	1e-05	1e-05	1e-05	1e-05	1e-05	1e-05	0.372389	1e-05	1e-05	1e-05	1e-05	1e-05	1e-05	1e-05	1e-05
C1orf53	1e-05	1e-05	1e-05	1e-05	1e-05	1e-05	1e-05	1e-05	1e-05	1e-05	1e-05	1e-05	1e-05	1e-05	1e-05	1e-05	1e-05	1e-05	1e-05	1e-05	1e-05	1e-05	1e-05	1e-05	1e-05	1e-05	1e-05	1e-05	1e-05	1e-05	1e-05	1e-05	1e-05	1e-05	1e-05	1e-05	1e-05	1e-05	1e-05	1e-05	1e-05	1e-05	1e-05	1e-05	1e-05	1e-05	1e-05	1e-05	1e-05
C1orf56	0.075694	0.0997178	1e-05	0.375092	1e-05	1e-05	1e-05	1e-05	1e-05	1e-05	1e-05	1e-05	0.147178	0.227178	1e-05	1e-05	1e-05	1e-05	1e-05	0.10057	1e-05	0.271437	1e-05	1e-05	1e-05	0.169947	0.312793	1e-05	1e-05	0.533204	1e-05	1e-05	1e-05	1e-05	0.183902	0.139772	0.136342	1e-05	0.233646	1e-05	1e-05	1e-05	1e-05	1e-05	1e-05	1e-05	1e-05	0.450027	1e-05
C1orf87	1e-05	1e-05	1e-05	1e-05	1e-05	1e-05	1e-05	1e-05	1e-05	1e-05	1e-05	1e-05	1e-05	1e-05	1e-05	1e-05	1e-05	1e-05	1e-05	1e-05	1e-05	1e-05	1e-05	1e-05	1e-05	1e-05	1e-05	1e-05	1e-05	1.04065	1e-05	1e-05	1e-05	1e-05	1e-05	1e-05	1e-05	1e-05	1e-05	1e-05	1e-05	1e-05	1e-05	1e-05	1e-05	1e-05	1e-05	1e-05	1e-05
C1QA	64.6263	78.8926	88.5753	83.5775	65.0961	59.8662	62.8257	56.4566	62.0947	27.7242	75.9512	57.0017	69.0511	84.5885	52.3719	105.635	91.8062	44.1564	91.9209	105.378	44.7834	40.3374	68.6581	73.0242	97.9202	67.4385	59.6135	79.6296	33.9228	72.3976	84.4963	95.2864	86.2443	38.2305	69.8087	35.6659	104.162	64.2514	90.5346	81.0402	47.5259	71.7396	86.2896	71.0823	40.6489	37.7991	61.0271	76.8523	85.2945
C1QB	39.8576	40.5128	42.5714	57.1889	36.5516	56.235	47.2565	40.2621	50.0495	36.2327	44.3879	55.7397	31.7754	48.9147	59.6032	55.247	52.8034	54.944	49.2003	41.2453	48.7477	54.8629	40.3907	38.4385	48.7242	35.7047	43.3267	57.5711	44.4891	48.9451	66.7866	41.2677	44.6558	44.0182	47.0746	43.0502	38.1857	53.5414	47.524	50.8971	51.6448	47.0242	63.5574	42.3509	43.3805	79.8701	49.6599	34.6555	66.5323
C1QBP	1e-05	1e-05	1e-05	1e-05	2.51605	1e-05	1e-05	1e-05	1e-05	1e-05	1e-05	1e-05	1e-05	1.29379	1e-05	1e-05	1e-05	1e-05	1.00105	1e-05	1e-05	1e-05	1e-05	1e-05	1e-05	1e-05	1e-05	1e-05	1e-05	1e-05	1e-05	1e-05	1e-05	1e-05	1e-05	1e-05	1e-05	1e-05	1e-05	1e-05	1.16725	1e-05	5.08633	1e-05	1e-05	1e-05	1e-05	1e-05	1e-05
C1QC	52.7359	45.0088	47.4278	93.7084	67.8834	55.5129	63.4109	40.5801	61.2168	52.0689	40.943	53.0137	39.6728	51.4302	73.6872	55.1296	58.6151	56.7101	53.4268	39.2105	49.8745	57.5684	58.5757	44.432	49.1523	46.8417	44.3917	69.4437	63.1701	66.7666	62.1794	54.4728	52.6094	46.244	56.2948	45.3101	54.0879	46.5937	50.7336	66.6775	60.2438	48.5169	78.727	56.7635	55.6463	69.6783	52.1889	45.4511	77.4368
C1QTNF3	1e-05	1e-05	0.387754	1e-05	1e-05	1e-05	1e-05	1e-05	0.264345	1e-05	1e-05	1e-05	1e-05	1e-05	1e-05	1e-05	1e-05	1e-05	1e-05	1e-05	1e-05	1e-05	1e-05	1e-05	1e-05	1e-05	1e-05	1e-05	1e-05	1e-05	1e-05	1e-05	1e-05	1e-05	1e-05	1e-05	1e-05	1e-05	1e-05	1e-05	1e-05	1e-05	1e-05	1e-05	1e-05	1e-05	1e-05	1e-05	1e-05
C1QTNF7	1e-05	1e-05	1e-05	1e-05	1e-05	1e-05	1e-05	1e-05	1e-05	0.170663	1e-05	1e-05	1e-05	1e-05	1e-05	1e-05	1e-05	1e-05	1e-05	1e-05	1e-05	1e-05	1e-05	1e-05	1e-05	1e-05	1e-05	1e-05	1e-05	1e-05	1e-05	1e-05	1e-05	1e-05	1e-05	1e-05	1e-05	1e-05	1e-05	1e-05	1e-05	1e-05	1e-05	1e-05	1e-05	1e-05	1e-05	1e-05	1e-05
C1R	17.5933	17.4271	21.25	23.5177	21.5063	20.8901	19.8276	10.9461	22.9267	18.9228	15.5378	15.3407	12.7381	17.4852	26.3357	24.5653	17.2552	24.4694	15.759	13.4483	39.1842	16.0975	20.4766	15.227	16.424	15.4235	12.1046	21.1365	23.4281	19.7028	23.3428	16.2168	20.4196	18.2651	15.4151	25.4411	16.3795	25.5861	11.2516	22.4681	23.1852	16.879	24.1893	18.1459	17.2317	20.0823	19.533	20.9042	19.4557
C1RL	11.9134	8.42783	11.849	9.9874	9.82031	10.6336	8.93761	8.68028	8.57531	10.4433	5.88306	15.7475	7.56393	9.57719	12.0998	10.8103	8.76735	12.7663	12.8906	8.90252	11.2548	8.59326	9.48926	7.09124	7.18963	8.04929	6.36704	7.77643	9.53741	12.3254	10.136	9.49876	8.69358	12.2139	12.024	12.6447	8.22135	11.2238	8.90356	11.531	8.65798	11.5886	11.4435	9.34838	7.07982	16.244	9.74661	7.77799	14.4373
C1S	33.8646	37.247	43.9398	40.0256	30.5623	40.3399	34.579	28.7115	52.8288	36.6018	35.1614	29.7912	37.609	39.3331	50.4558	41.7055	39.338	42.6248	36.0911	33.6034	58.3265	34.5533	40.9922	36.1075	40.9155	32.1074	33.5246	39.2539	39.9005	41.1758	43.9596	36.7904	35.3649	33.1955	38.1506	45.6586	38.2754	54.4582	29.5657	45.0873	42.0639	34.9718	53.4175	32.1623	39.0611	40.944	35.3228	31.4365	33.5518
C2	13.01	10.6076	12.2233	16.8538	11.5869	15.9401	12.4158	7.61142	13.9012	11.9654	10.9351	10.3657	11.4051	9.84411	12.604	14.4486	12.4722	12.2015	9.92137	82.1919	14.2263	12.6745	16.0369	11.7344	42.7002	9.04728	8.03116	12.3599	13.9952	13.6162	14.7673	19.6884	10.4322	11.1655	9.78299	15.7606	9.7521	11.7033	12.0178	19.9612	14.4364	13.2716	15.1446	9.7852	16.1991	15.8193	13.8767	11.6817	16.0119
C20orf27	1e-05	1e-05	1e-05	1e-05	1e-05	1e-05	1e-05	1e-05	1e-05	1e-05	1e-05	1e-05	1e-05	1e-05	1e-05	1e-05	1e-05	1e-05	1e-05	0.511717	1e-05	1e-05	1e-05	1e-05	1e-05	1e-05	1e-05	1e-05	1e-05	1e-05	1e-05	1e-05	172.252	1e-05	1e-05	1e-05	1e-05	1e-05	1e-05	1e-05	1e-05	1e-05	1e-05	1e-05	0.0872646	1e-05	1e-05	1e-05	1e-05
C2CD2	1e-05	1e-05	1e-05	0.0826361	1e-05	1e-05	1e-05	1e-05	1e-05	1e-05	1e-05	1e-05	1e-05	1e-05	1e-05	1e-05	1e-05	1e-05	1e-05	0.174666	1e-05	1e-05	1e-05	1e-05	1e-05	1e-05	1e-05	1e-05	1e-05	1e-05	1e-05	1e-05	1e-05	1e-05	1e-05	1e-05	1e-05	1e-05	1e-05	1e-05	1e-05	1e-05	1e-05	1e-05	1e-05	1e-05	0.0941165	1e-05	1e-05
C2CD2L	1e-05	1e-05	1e-05	1e-05	1e-05	1e-05	1e-05	1e-05	1e-05	1e-05	1e-05	1e-05	1e-05	1e-05	1e-05	1e-05	1e-05	0.374453	1e-05	1e-05	1e-05	1e-05	1e-05	1e-05	1e-05	1e-05	1e-05	1e-05	1e-05	1e-05	1e-05	1e-05	1e-05	1e-05	1e-05	1e-05	1e-05	1e-05	1e-05	1e-05	1e-05	1e-05	1e-05	1e-05	1e-05	1e-05	1e-05	1e-05	1e-05
C2CD5	2.2596	2.54952	2.76675	2.65573	2.58907	2.66382	2.68614	0.877844	0.912126	2.56695	2.91754	2.77789	2.71377	2.55032	2.77399	1.76888	2.88042	1.23045	0.0712294	0.169133	2.81914	0.959919	1.45707	2.27011	1.26879	2.42879	0.134209	2.65759	2.741	2.70796	0.0714394	0.145264	2.52944	0.859159	2.97561	2.51193	3.02486	1.88488	0.73437	2.7388	2.01681	2.62712	1.04335	2.36968	1.2663	0.973467	2.22463	2.62817	2.94865
C2orf49	1e-05	1e-05	1e-05	1e-05	1e-05	1e-05	1e-05	1e-05	1e-05	1e-05	1e-05	1e-05	1e-05	1e-05	1e-05	1e-05	1e-05	1e-05	1e-05	1e-05	1e-05	1e-05	1e-05	1e-05	1e-05	1e-05	1e-05	1e-05	1e-05	1e-05	1e-05	1e-05	1e-05	1e-05	1e-05	1e-05	1e-05	1e-05	1e-05	1e-05	1e-05	1e-05	1e-05	1e-05	1e-05	1e-05	1e-05	1e-05	1e-05
C2orf69	1e-05	1e-05	1e-05	1e-05	1e-05	1e-05	1e-05	1e-05	1e-05	1e-05	1e-05	1e-05	1e-05	1e-05	1e-05	1e-05	1e-05	1e-05	1e-05	1e-05	1e-05	1e-05	1e-05	1e-05	1e-05	1e-05	1e-05	1e-05	1e-05	1e-05	1e-05	1e-05	1e-05	1e-05	1e-05	1e-05	1e-05	1e-05	1e-05	1e-05	1e-05	1e-05	1e-05	1e-05	1e-05	1e-05	0.504889	1e-05	1e-05
C2orf72	1e-05	1e-05	1e-05	1e-05	1e-05	1e-05	1e-05	1e-05	1e-05	1e-05	1e-05	1e-05	1e-05	1e-05	1e-05	1e-05	1e-05	1e-05	1e-05	1e-05	1e-05	1e-05	1e-05	1e-05	1e-05	1e-05	1e-05	1e-05	1e-05	1e-05	1e-05	1e-05	1e-05	1e-05	1e-05	1e-05	1e-05	1e-05	1e-05	1e-05	1e-05	1e-05	1e-05	1e-05	1e-05	1e-05	1e-05	1e-05	1e-05
C2orf88	1e-05	1e-05	1e-05	1e-05	1e-05	1e-05	1e-05	1e-05	1e-05	1e-05	1e-05	1e-05	1e-05	1e-05	1e-05	1e-05	1e-05	2.1834	1e-05	1e-05	1e-05	2.60595	1e-05	1e-05	1e-05	1e-05	1e-05	1e-05	1e-05	1e-05	1e-05	1e-05	1e-05	1e-05	1e-05	1e-05	1e-05	1e-05	1e-05	1e-05	1e-05	1e-05	1e-05	1e-05	3.39904	1e-05	1e-05	1e-05	1e-05
C3	650.742	628.02	901.822	845.011	653.819	760.354	655.396	461.721	953.897	619.606	901.311	755.472	640.582	731.635	896.66	1054.63	860.332	697.108	560.968	965.623	800.206	829.005	669.871	625.083	934.37	607.149	736.848	798.01	595.786	824.665	898.162	714.187	641.815	653.751	572.395	755.371	611.438	752.529	778.361	770.497	642.452	846.939	818.55	629.331	607.666	747.775	901.447	648.757	901.447
C3AR1	1e-05	1e-05	1e-05	1e-05	1e-05	1e-05	1e-05	1e-05	1e-05	1e-05	1e-05	1e-05	1e-05	1e-05	1e-05	1e-05	1e-05	1e-05	1e-05	1e-05	1e-05	1e-05	1e-05	1e-05	1e-05	1e-05	1e-05	1e-05	1e-05	1e-05	1e-05	1e-05	1e-05	1e-05	1e-05	1e-05	1e-05	1e-05	1e-05	1e-05	1e-05	1e-05	1e-05	1e-05	1e-05	1e-05	1e-05	1e-05	1e-05
C3orf38	0.0466705	1e-05	1e-05	1e-05	1e-05	1e-05	1e-05	1e-05	1e-05	1e-05	1e-05	1e-05	1e-05	1e-05	1e-05	0.423423	1e-05	0.552917	1e-05	1e-05	1e-05	1e-05	1e-05	1e-05	1e-05	1e-05	1e-05	1e-05	1e-05	1e-05	1e-05	1e-05	1e-05	1e-05	1e-05	0.0409083	1e-05	1e-05	1e-05	0.968708	1e-05	1e-05	1e-05	1e-05	1e-05	1e-05	1.37823	1e-05	1e-05
C4A	77.5061	139.249	122.372	145.686	69.1959	217.645	72.0113	50.8498	131.942	66.6383	131.287	169.806	101.2	181.248	219.531	155.815	108.506	250.43	93.6971	82.988	123.628	98.9044	149.389	95.2665	123.642	72.5747	89.2	88.8912	98.3668	91.1862	116.788	139.604	85.4239	109.247	82.6535	132.748	75.5697	114.238	92.2316	144.503	97.1943	132.56	130.351	112.639	139.594	121.379	140.939	84.768	108.023
C4B	79.6514	143.646	123.539	147.237	70.0807	223.404	72.8009	51.575	133.987	68.9534	133.474	168.392	102.662	184.057	222.765	156.165	110.079	254.288	95.7027	82.3348	124.371	100.553	150.013	97.2147	124.557	74.0551	84.0395	91.0498	99.2926	91.9529	117.216	142.623	83.9384	110.828	84.1839	133.257	76.7932	117.274	91.6662	146.973	100.472	136.822	128.956	118.162	139.289	121.726	138.312	86.2655	110.972
C4BPA	34.6863	50.6014	59.5018	80.7235	50.4758	71.0123	51.7924	34.6864	58.841	51.013	50.0479	35.504	62.1739	62.7702	70.0656	53.9281	61.2933	67.0375	57.817	56.4896	57.0576	47.9093	52.4644	50.0779	48.5301	46.8751	55.3401	51.2698	57.9099	53.834	57.8927	50.687	51.1722	55.4158	40.5578	63.9855	41.5048	58.704	40.9928	72.8179	65.6413	78.6605	50.0608	47.212	50.1144	53.1254	64.5786	47.1154	62.8759
C4BPB	0.475173	2.22972	2.5643	0.937792	1.29744	1.99536	0.950025	2.73266	1.29264	0.737448	2.19109	1.06992	3.86325	1.59645	4.113	1.49101	2.47762	1.02818	2.26731	1.18099	4.56755	0.865878	0.888416	1.06379	1.32125	1.95734	1.2898	2.45846	0.739925	0.617309	4.40927	0.876857	1.21083	1.86641	1.50351	2.37821	2.08954	1.03802	0.978333	1.84274	1.40374	1.84842	0.999597	2.56204	1.07967	3.68726	0.972628	0.731197	0.909
C4orf33	1e-05	1e-05	1e-05	1e-05	1e-05	1e-05	1e-05	1e-05	1e-05	1e-05	1e-05	1e-05	1e-05	1e-05	1e-05	1e-05	1e-05	1e-05	1e-05	1e-05	1e-05	1e-05	1e-05	1e-05	1e-05	1e-05	1e-05	1e-05	1e-05	1e-05	1e-05	1e-05	1e-05	1e-05	1e-05	1e-05	1e-05	1e-05	1e-05	1e-05	1e-05	1e-05	1e-05	1e-05	1e-05	1e-05	1e-05	1e-05	1e-05
C5	31.1563	26.2996	40.0922	43.5202	31.5939	40.4831	27.8453	22.6236	32.827	35.3283	34.1315	23.6913	26.49	36.9209	40.2621	41.1491	29.7761	38.4715	32.3323	28.8873	36.986	31.8745	27.4975	30.0642	29.4694	35.7192	28.4928	27.7521	34.2803	36.834	36.6489	31.7315	26.9841	31.6635	25.8676	35.0629	27.5033	36.5263	24.0596	38.5185	27.6407	41.6632	26.5639	31.3128	27.7044	30.4905	37.2117	26.039	36.3266
C5orf22	1e-05	1e-05	1e-05	1e-05	1e-05	1e-05	1e-05	1e-05	1e-05	1e-05	1e-05	1e-05	1e-05	1e-05	1e-05	1e-05	1e-05	1e-05	1e-05	1e-05	1e-05	1e-05	1e-05	1e-05	1e-05	1e-05	1e-05	1e-05	1e-05	1e-05	1e-05	1e-05	1e-05	1e-05	1e-05	1e-05	1e-05	1e-05	1e-05	1e-05	1e-05	1e-05	1e-05	1e-05	1e-05	1e-05	1e-05	1e-05	1e-05
C6	12.363	14.5519	18.7782	13.6345	17.5099	18.5866	16.8545	11.6887	20.8443	20.6034	18.7216	9.52087	16.4761	15.6885	28.5488	24.8275	14.8986	17.5593	13.087	17.2163	17.2785	21.1852	14.9671	16.121	13.0301	15.0472	16.476	21.557	16.4345	18.1774	20.4523	17.8588	20.283	21.7766	11.4894	16.254	17.3304	17.4167	17.044	14.0149	14.342	17.4262	17.0847	11.1776	21.9002	17.894	19.0126	18.159	17.1922
C6orf120	1e-05	1e-05	1e-05	1e-05	1e-05	1e-05	1e-05	1e-05	1e-05	1e-05	1e-05	1e-05	1e-05	1e-05	1e-05	1e-05	1e-05	1e-05	1e-05	1e-05	1e-05	1e-05	1e-05	1e-05	1e-05	1e-05	1e-05	1e-05	1e-05	1e-05	1e-05	1e-05	1e-05	1e-05	1e-05	1e-05	1e-05	1e-05	1e-05	1e-05	1e-05	1e-05	1e-05	1e-05	1e-05	1e-05	1e-05	1e-05	1e-05
C6orf132	1e-05	1e-05	1e-05	1e-05	1e-05	1e-05	1e-05	1e-05	1e-05	1e-05	1e-05	1e-05	1e-05	1e-05	1e-05	1e-05	1e-05	1e-05	1e-05	1e-05	1e-05	1e-05	1e-05	1e-05	1e-05	1e-05	1e-05	1e-05	1e-05	1e-05	1e-05	1e-05	1e-05	1e-05	1e-05	1e-05	1e-05	1e-05	1e-05	1e-05	1e-05	1e-05	1e-05	1e-05	1e-05	1e-05	1e-05	1e-05	1e-05
C6orf58	1e-05	1e-05	1e-05	0.278459	1e-05	1e-05	1e-05	1e-05	1e-05	1e-05	1e-05	1e-05	1e-05	1e-05	1e-05	1e-05	1e-05	1e-05	0.171138	1e-05	1e-05	1e-05	1e-05	0.24364	1e-05	1e-05	1e-05	1e-05	1e-05	1e-05	0.477983	1e-05	1e-05	0.235404	1e-05	1e-05	1e-05	1e-05	1e-05	1e-05	1e-05	0.243157	1e-05	1e-05	1e-05	1e-05	1e-05	1e-05	1e-05
C6orf89	1e-05	1e-05	1e-05	1e-05	1e-05	1e-05	1e-05	1e-05	1e-05	1e-05	1e-05	1e-05	1e-05	1e-05	1e-05	1e-05	1e-05	1e-05	1e-05	1e-05	1e-05	1e-05	0.0344192	1e-05	1e-05	1e-05	1e-05	1e-05	1e-05	1e-05	1e-05	1e-05	1e-05	1e-05	1e-05	1e-05	1e-05	1e-05	1e-05	1e-05	1e-05	1e-05	1e-05	1e-05	1e-05	1e-05	1e-05	1e-05	1e-05
C7	32.4998	34.2889	27.3901	39.7458	44.0038	15.1301	38.9638	20.8248	41.7681	13.7696	13.8674	31.0505	45.8999	38.0774	49.9531	59.9135	20.7036	39.5846	20.3197	21.5719	12.5437	15.3889	52.1644	25.5425	10.4338	17.3133	10.0473	32.4874	12.818	16.7875	32.4874	23.965	24.8872	23.6974	15.2181	26.8984	34.8347	19.4143	11.2843	45.3411	23.6742	29.9257	47.431	24.7542	21.45	41.7255	49.1839	39.7634	56.0941
C7orf26	1e-05	1e-05	1e-05	1e-05	1e-05	1e-05	1e-05	1e-05	1e-05	1e-05	1e-05	1e-05	1e-05	1e-05	1e-05	0.194318	1e-05	1e-05	1e-05	1e-05	1e-05	1e-05	1e-05	1e-05	1e-05	1e-05	1e-05	1e-05	1e-05	1e-05	0.149804	1e-05	1e-05	1e-05	1e-05	1e-05	1e-05	1e-05	1e-05	1e-05	1e-05	1e-05	1e-05	1e-05	1e-05	1e-05	1.01147	1e-05	1e-05
C7orf50	1e-05	1e-05	1e-05	1e-05	1e-05	1e-05	1e-05	1e-05	1e-05	1e-05	1e-05	1e-05	1e-05	1e-05	1e-05	1e-05	1e-05	1e-05	1e-05	1e-05	1e-05	1e-05	1e-05	1e-05	1e-05	1e-05	1e-05	1e-05	1e-05	1e-05	1e-05	1e-05	1e-05	1e-05	1e-05	1e-05	1e-05	1e-05	1e-05	1e-05	1e-05	1e-05	1e-05	1e-05	1e-05	1e-05	1e-05	1e-05	1e-05
C8A	1037.56	895.097	908.523	31.2673	653.411	846.032	940.984	819.048	813.934	503.873	486.013	836.45	847.569	736.445	725.743	936.251	809.654	864.201	745.474	599.981	1037.33	1159.87	896.982	1065.31	782.207	1044.62	344.804	757.039	984.476	799.574	680.196	775.08	1005.16	966.386	832.067	765.124	685.609	822.24	782.642	769.992	1075.13	586.461	697.497	779.781	929.81	854.667	639.669	964.245	748.659
C8B	28.9743	22.5773	36.8808	42.3042	31.3284	34.6392	26.7005	19.2935	27.408	25.4871	34.694	23.6252	27.6853	38.3223	38.325	39.9691	29.4678	32.5679	23.6083	26.994	31.3665	25.6343	30.4421	30.6817	25.8179	21.149	25.7361	25.3968	33.3483	33.3084	26.4669	28.7691	23.1071	32.5723	21.161	24.1947	26.496	36.681	31.6911	34.4881	35.2902	33.6132	23.2335	28.3219	27.2594	31.8846	32.5383	30.1364	34.3568
C8G	16.2201	26.1893	38.2083	43.4795	20.7304	18.1137	27.6758	21.1613	41.8212	31.6882	32.0846	31.1766	28.687	42.8871	44.5076	27.0079	28.8221	30.2009	15.6427	26.2555	42.0982	17.9852	47.7335	37.34	21.2324	17.4224	20.2115	29.2547	37.0188	38.0484	32.4138	29.1367	21.7002	28.2782	30.5052	29.3799	23.7677	34.168	15.9922	26.7139	15.7971	34.56	22.3485	24.1569	27.0084	46.8464	47.5769	35.399	44.3579
C8orf82	1e-05	1e-05	1e-05	1e-05	1e-05	1e-05	1e-05	1e-05	1e-05	1e-05	1e-05	1e-05	1e-05	1e-05	1e-05	1e-05	1e-05	1e-05	1e-05	1e-05	1e-05	1e-05	1e-05	1e-05	1e-05	1e-05	1e-05	1e-05	1e-05	1e-05	1e-05	1e-05	1e-05	1e-05	1e-05	1e-05	1e-05	1e-05	1e-05	1e-05	1e-05	1e-05	1e-05	1e-05	1e-05	1e-05	1e-05	1e-05	1e-05
C9	21.9861	26.4412	44.1791	53.3233	38.7794	47.7299	25.3478	24.4391	33.999	41.7712	43.4025	28.3922	31.5423	41.5434	46.2212	33.804	14.9593	32.9152	30.6541	34.7902	28.7556	39.1833	34.6364	25.9652	27.2245	25.2522	23.7035	28.2204	37.0133	31.9064	39.3901	28.4903	41.704	27.9801	24.0188	75.8992	23.4313	53.6264	23.1307	38.2866	35.7782	44.1355	35.8111	33.7377	33.0294	41.622	61.5622	27.5642	44.1444
C9orf129	1e-05	1e-05	1e-05	1e-05	1e-05	1e-05	1e-05	1e-05	1.64614	1e-05	1e-05	1e-05	1e-05	1e-05	1e-05	1e-05	1e-05	0.467992	1e-05	1e-05	1e-05	1e-05	1e-05	2.21343	1e-05	1e-05	1e-05	1e-05	1e-05	1e-05	1e-05	1e-05	1e-05	1e-05	1e-05	1e-05	1e-05	1e-05	1e-05	1e-05	1e-05	1e-05	1e-05	1e-05	1e-05	1e-05	1e-05	1e-05	1e-05
C9orf16	1e-05	1e-05	1e-05	1e-05	1e-05	1e-05	1e-05	1e-05	1e-05	1e-05	1e-05	1e-05	1e-05	1e-05	1e-05	1e-05	1e-05	1e-05	1e-05	1e-05	1e-05	1e-05	1e-05	1e-05	1e-05	1e-05	1e-05	1e-05	1e-05	1e-05	1e-05	1e-05	1e-05	1e-05	1e-05	1e-05	1e-05	1e-05	1e-05	1e-05	1e-05	1e-05	1e-05	1e-05	1e-05	1e-05	1e-05	1e-05	1e-05
C9orf64	2.2596	2.54952	0.601809	0.429127	2.58907	2.66382	2.68614	2.46211	2.63341	2.56695	0.241499	0.14036	0.557488	2.55032	15.0062	0.34283	1.14472	0.339257	2.58955	0.553961	2.81914	2.55642	2.84351	2.27011	0.620374	0.40479	2.58847	2.65759	2.741	2.70796	0.888856	2.865	14.5211	2.42704	0.270827	2.51193	2.63405	22.5445	2.51576	2.7388	0.3466	1.53465	0.597101	2.36968	0.806383	2.91661	2.77519	0.650688	2.94865
C9orf78	1e-05	1e-05	1e-05	1e-05	1e-05	1e-05	1e-05	1e-05	1e-05	1e-05	1e-05	1e-05	1e-05	1e-05	1e-05	1e-05	1e-05	1e-05	1e-05	1e-05	1e-05	1e-05	1e-05	1e-05	1e-05	1e-05	1e-05	1e-05	1e-05	1e-05	1e-05	1e-05	1e-05	1e-05	1e-05	1e-05	1e-05	1e-05	1e-05	1e-05	1e-05	1e-05	1e-05	1e-05	1e-05	1e-05	1e-05	1e-05	1e-05
CA1	5.03254	4.56739	10.2151	10.4127	3.41908	16.6987	5.01999	12.9089	4.57625	6.08367	21.0609	6.02611	7.89997	5.93902	7.75572	12.198	16.5042	9.3756	6.94778	20.8647	3.58402	3.8131	14.2119	15.5442	5.65909	18.806	1.87192	13.354	14.9821	5.17341	14.6694	6.24852	4.8139	11.7753	7.95484	3.69101	22.6075	6.53132	9.70358	12.7578	11.5945	4.90735	7.52485	17.8109	8.81982	15.0186	5.6929	7.05023	18.3072
CA12	1e-05	2.08742	1e-05	1e-05	1.39095	1e-05	1e-05	1e-05	1e-05	1e-05	1e-05	1e-05	1e-05	1e-05	1e-05	1e-05	1e-05	1e-05	1e-05	1e-05	1e-05	1.89253	1e-05	1e-05	1e-05	1e-05	1e-05	1e-05	1e-05	1e-05	1e-05	1e-05	1e-05	1e-05	1e-05	1e-05	1e-05	1e-05	1e-05	1e-05	1e-05	1e-05	1e-05	1e-05	1e-05	1e-05	1e-05	1e-05	1e-05
CA13	1e-05	1e-05	1e-05	1e-05	1e-05	1e-05	1e-05	1e-05	1e-05	1e-05	1e-05	1e-05	1e-05	1e-05	1e-05	1e-05	1e-05	1e-05	1e-05	1e-05	1e-05	1e-05	1e-05	1e-05	1e-05	1e-05	1e-05	1e-05	1e-05	1e-05	1e-05	1e-05	1e-05	1e-05	1e-05	1e-05	1e-05	1e-05	1e-05	1e-05	1e-05	1e-05	1e-05	1e-05	1e-05	1e-05	1e-05	1e-05	1e-05
CA2	6.14848	40.5663	6.24468	15.8845	312.74	34.5922	0.925819	2.64388	114.18	16.0823	9.82237	7.00507	5.84871	4.7065	12.4446	5.34932	3.10843	1.29379	2.34904	5.212	7.60604	0.798394	4.70062	24.2565	103.629	0.773264	8.53678	15.8127	7.73461	3.18934	3.35032	38.5973	2.71348	0.313449	247.799	1.82989	13.703	11.8726	3.36941	539.114	3.93905	1.23393	364.882	3.69467	2.99818	2.92972	1.13905	9.73151	2.58749
CA3	2.2596	2.54952	2.76675	0.106713	0.704551	0.0996899	2.68614	2.46211	0.198325	0.569246	0.236406	0.17536	2.71377	0.114497	2.77399	2.61719	0.135695	0.108667	0.314432	0.278255	0.135258	2.55642	2.84351	2.27011	2.75609	0.417135	0.653233	2.65759	0.185191	0.708365	0.746156	0.134832	2.52944	0.321617	2.97561	2.51193	3.02486	2.71306	2.51576	2.7388	2.39571	2.62712	0.169639	0.100754	0.622322	2.91661	2.77519	2.62817	2.94865
CA4	1e-05	1e-05	1e-05	1e-05	0.435836	1e-05	1e-05	0.303028	1e-05	1e-05	1e-05	1e-05	1e-05	1e-05	1e-05	1.07967	1.15941	1e-05	1e-05	1e-05	1e-05	1e-05	1e-05	1e-05	7.52584	1e-05	0.414763	1e-05	1e-05	1e-05	1e-05	1e-05	1e-05	1e-05	1e-05	1e-05	1e-05	1e-05	1e-05	1e-05	1e-05	1e-05	1e-05	1e-05	1e-05	1e-05	1e-05	1e-05	1e-05
CA5B	1e-05	1e-05	1e-05	1e-05	1e-05	1e-05	1e-05	1e-05	1e-05	1e-05	1e-05	1e-05	1e-05	1e-05	1e-05	1e-05	1e-05	1e-05	1e-05	1e-05	1e-05	1e-05	1e-05	1e-05	1e-05	1e-05	1e-05	1e-05	1e-05	1e-05	1e-05	1e-05	1e-05	1e-05	1e-05	1e-05	1e-05	1e-05	1e-05	1e-05	1e-05	1e-05	1e-05	1e-05	1e-05	1e-05	1e-05	1e-05	1e-05
CA6	1e-05	1e-05	1e-05	1e-05	1e-05	1e-05	1e-05	1e-05	1e-05	1e-05	1e-05	1e-05	1e-05	1e-05	1e-05	1e-05	1e-05	1e-05	1e-05	1e-05	1e-05	1e-05	1e-05	1e-05	1e-05	1e-05	1e-05	1e-05	1e-05	1e-05	1e-05	1e-05	1e-05	1e-05	1e-05	1e-05	1e-05	1e-05	1e-05	1e-05	1e-05	1e-05	1e-05	1e-05	1e-05	1e-05	1e-05	1e-05	1e-05
CA8	1e-05	1e-05	1e-05	1e-05	1e-05	1e-05	1e-05	1e-05	1e-05	1e-05	1e-05	1e-05	1e-05	1e-05	1e-05	1e-05	5.25517	1e-05	1e-05	1e-05	1e-05	1e-05	1e-05	1e-05	1e-05	1e-05	1e-05	1e-05	4.25601	1e-05	1e-05	1e-05	1e-05	1e-05	1e-05	1e-05	1e-05	1e-05	1e-05	1e-05	1e-05	1e-05	1e-05	1e-05	1e-05	1e-05	1e-05	1e-05	1e-05
CA9	1e-05	1e-05	0.544514	1e-05	1e-05	1e-05	1e-05	1e-05	1e-05	0.271723	1e-05	1e-05	1e-05	1e-05	1e-05	1e-05	1e-05	1e-05	1e-05	1e-05	1e-05	1e-05	1e-05	1e-05	1e-05	1e-05	1e-05	1e-05	1e-05	1e-05	1e-05	1e-05	1e-05	1e-05	1e-05	1e-05	1e-05	0.366243	1e-05	1e-05	1e-05	1e-05	1e-05	1e-05	0.334317	1e-05	1e-05	1e-05	1e-05
CAB39	1e-05	1e-05	1e-05	1e-05	1e-05	1e-05	1e-05	1e-05	1e-05	1e-05	1e-05	1e-05	1e-05	1e-05	1e-05	1e-05	1e-05	1e-05	1e-05	1e-05	1e-05	1e-05	1e-05	1e-05	1e-05	0.246638	1e-05	1e-05	1e-05	1e-05	1e-05	1e-05	1e-05	1e-05	1e-05	1e-05	1e-05	1e-05	1e-05	1e-05	1e-05	1e-05	1e-05	1e-05	1e-05	1e-05	1e-05	1e-05	1e-05
CAB39L	1e-05	1e-05	1e-05	1e-05	1e-05	1e-05	1e-05	1e-05	1e-05	1e-05	1e-05	1e-05	1e-05	1e-05	1e-05	1e-05	1e-05	1e-05	1e-05	1e-05	1e-05	1e-05	1e-05	1e-05	1e-05	1e-05	1e-05	1e-05	1e-05	1e-05	1e-05	1e-05	1e-05	1e-05	1e-05	1e-05	1e-05	1e-05	1e-05	1e-05	1e-05	1e-05	1e-05	1e-05	1e-05	1e-05	1e-05	1e-05	1e-05
CACNA2D1	0.733706	0.0966342	0.393876	1.45666	0.519686	0.827662	0.242829	0.689012	0.127019	0.420799	0.0121036	0.15359	0.393782	0.0865235	0.354603	1.03579	0.237222	0.367653	0.494372	0.330662	0.851047	0.746788	0.287983	0.506076	0.523591	0.560415	0.77882	1.1835	0.277302	2.07245	0.656117	0.322729	0.3702	0.97741	0.356587	0.326285	0.49148	0.464646	0.875771	0.327674	0.54592	0.549098	1.85514	0.580905	0.41482	0.346272	0.256144	1.73702	0.225937
CACNA2D2	0.376513	0.0966342	0.23282	0.349653	0.46244	0.327273	0.242829	0.219142	0.303154	0.420799	0.224019	0.15359	0.261587	0.278645	0.217149	0.681136	0.237222	0.324461	0.446221	0.330662	0.494855	0.161861	0.287983	0.488892	0.286341	0.560415	0.443414	0.173681	0.277302	0.85435	0.256996	0.267678	0.341076	0.446858	0.250623	0.326285	0.176075	0.28732	0.0953334	0.295858	0.313353	0.216185	0.310158	0.310665	0.41482	0.346272	0.256144	0.26423	0.225937
CACNA2D3	1e-05	1e-05	1e-05	1e-05	1e-05	1e-05	1e-05	1e-05	1e-05	1e-05	1e-05	1e-05	1e-05	1e-05	1e-05	1e-05	1e-05	1e-05	1e-05	1e-05	1e-05	0.0440647	1e-05	1e-05	1e-05	1e-05	1e-05	1e-05	1e-05	1e-05	1e-05	1e-05	1e-05	1e-05	1e-05	1e-05	1e-05	1e-05	0.0366499	1e-05	1e-05	1e-05	1e-05	1e-05	1e-05	1e-05	1e-05	1e-05	1e-05
CACTIN	1e-05	1e-05	1e-05	1e-05	1e-05	1e-05	1e-05	1e-05	0.330085	1e-05	1e-05	1e-05	1e-05	1e-05	1e-05	1e-05	1e-05	1e-05	1e-05	1e-05	1e-05	1e-05	1e-05	1e-05	1e-05	1e-05	1e-05	1e-05	1e-05	1e-05	1e-05	1e-05	1e-05	1e-05	1e-05	1e-05	1e-05	1e-05	1e-05	1e-05	1e-05	1e-05	1e-05	1e-05	1e-05	1e-05	1e-05	1e-05	1e-05
CACYBP	1e-05	1e-05	1e-05	1e-05	1e-05	1e-05	1e-05	1e-05	1e-05	1e-05	1e-05	1e-05	1e-05	1e-05	1e-05	1e-05	1e-05	1e-05	1e-05	1e-05	1e-05	1e-05	1e-05	1e-05	1e-05	1e-05	1e-05	1e-05	1e-05	1e-05	1e-05	1e-05	1e-05	1e-05	1e-05	1e-05	0.476453	1e-05	1e-05	1e-05	1e-05	1e-05	1e-05	1e-05	1e-05	1e-05	1e-05	1e-05	1e-05
[truncated: 7,948 more rows]
[truncated: 262 more columns]

## Sheet: Table S1C
Table S1C : Genes identified at protein level in confirmatory cohort.
[truncated: 7,596 more rows]
[truncated: 64 more columns]
